# Supplementary material for: Transcriptional Repression of MFG-E8 Causes Disturbance in the Homeostasis of Cell Cycle Through DOCK/ZP4/STAT Signaling in Buffalo Mammary Epithelial Cells
Source: Front Cell Dev Biol. 2021 Apr 1;9:568660. doi: 10.3389/fcell.2021.568660 (PMC8047144; doi:10.3389/fcell.2021.568660)
Supplement: Supplementary Table 1 — Total combined identified protein and peptide list together with the identification of all ontological information associated in the Uniprot database. [file Table_1.XLSX]

## Sheet: azmalmfge8cometinteract.prot
entry no.	protein	protein probability	protein description	percent coverage	tot indep spectra	percent share of spectrum ids	LIBRA number peptides	LIBRA 1 ratio	LIBRA 1 error	LIBRA 2 ratio	LIBRA 2 error	Fold change 114 /115 treatment/control	LIBRA 3 ratio	LIBRA 3 error	LIBRA 4 ratio	LIBRA 4 error	peptides
4	sp|A0JN52|SF3B3_BOVIN tr|L8IPC4|L8IPC4_9CETA	1	Splicing factor 3B subunit 3 OS=Bos taurus GN=SF3B3 PE=2 SV=1;Splicing factor 3B subunit 3 OS=Bos mutus GN=M91_18490 PE=4 SV=1	18.1	15	0.004	6	0.16	0.02	0.33	0.04	0.484848	0.14	0.03	0.33	0.04	DYIVVGSDSGR+EMSADVVCMSLANVPPGEQR+ITLETDEDMVTEIR+IVPGQFLAVDPKGR+KEMSADVVCMSLANVPPGEQR+LGAVFNQVAFPLQYTPR+LVYILNR+MQGQEAVLAMSSR+QKNVSEELDRTPPEVSK+RNENQLIIFADDTYPR+SWLSYSYQSR+TPVEEVPAAIAPFQGR+TVLDPVTGDLSDTRTR+VYDLGKK+WVTTASLLDYDTVAGADK+YLGSRPVK
5	sp|A0JN54|DGKA_BOVIN	1	Diacylglycerol kinase alpha OS=Bos taurus GN=DGKA PE=2 SV=1	15.5	21	0.005	5	0.19	0.02	0.36	0.02	0.527778	0.16	0.03	0.28	0.02	CLRWGGGYEGQNLGK+DGPEPGLR+DIGVQSHVWVRGGCESGR+DNGQHMWRPKR+IIIQMMR+ISQKTMDDLSLSTSEALR+ITHRNQMPMLVGPPPR+MAKERGLISPSDFAQLQK+NQMPMLVGPPPR+TMDDLSLSTSEALR+TSKISQKTMDDLSLSTSEALR
6	sp|A0JN62-2|CE120_BOVIN sp|A0JN62|CE120_BOVIN	1	Isoform 2 of Centrosomal protein of 120 kDa OS=Bos taurus GN=CEP120;Centrosomal protein of 120 kDa OS=Bos taurus GN=CEP120 PE=2 SV=2	20.2	22	0.006	9	0.17	0.02	0.27	0.02	0.62963	0.23	0.02	0.32	0.02	AKQKLAPIPVELAPTVGVSVALQR+ASVRIRSSIEILR+DKMSKDLLLGIAR+EGMDVQSLIELK+EQQLAIAESELQRER+EQQLAIAESELQRERR+ETIGYIVLDLR+EVLAKNNASN+LIEERDTLMR+NLQELQDSIRR+QIREVLAKNNASN+QKELAHMQALAEEWKK+QQEELEQMR+QTFSESVPIVATQGSNNR+TERQELLDIRNELNR+TLIDLEKR
7	sp|A0JN86|PCGF5_BOVIN tr|L8HYV8|L8HYV8_9CETA	1	Polycomb group RING finger protein 5 OS=Bos taurus GN=PCGF5 PE=2 SV=1;Polycomb group RING finger protein 5 OS=Bos mutus GN=M91_06942 PE=4 SV=1	12.9	7	0.002	3	0.15	0.04	0.3	0.01	0.5	0.19	0.08	0.32	0.05	LDNTLEEIIFKLVPGLR+NNGQSGDNVVK+NNGQSGDNVVKGLMKK
8	sp|A0JN95|MET15_BOVIN tr|L8IY08|L8IY08_9CETA	1	Probable methyltransferase-like protein 15 OS=Bos taurus GN=METTL15 PE=2 SV=1;Putative S-adenosyl-L-methionine-dependent methyltransferase METT5D1 OS=Bos mutus GN=M91_05047 PE=3 SV=1	19.4	6	0.002	3	0.2	0.04	0.32	0.02	0.625	0.25	0.03	0.2	0.05	IASAIIQAR+IASAIIQARGLYPITR+KDGPLDMRMDGDR+LHIPVMVDEVVR+QIRAILGQFSQAEALLMK+TQQLASIVAGAFPPSALYAR
9	sp|A0JNB0|FYN_BOVIN tr|L8IYA5|L8IYA5_9CETA	1	Tyrosine-protein kinase Fyn OS=Bos taurus GN=FYN PE=2 SV=1;Tyrosine-protein kinase OS=Bos mutus GN=M91_09960 PE=3 SV=1	22	18	0.006	10	0.16	0.02	0.32	0.01	0.5	0.2	0.02	0.3	0.02	DAERQLLSFGNPR+DGEGRALK+DWDDMKGDHVK+EVLEQVERGYR+FPIKWTAPEAALYGR+GSLLDFLKDGEGR+GSLLDFLKDGEGRALK+GTFLIRESETTK+LDNGGYYITTR+LPNLVDMAAQVAAGMAYIER+VPYPGMNNREVLEQVER
10	sp|A0JND3|EOGT_BOVIN tr|L8IV21|L8IV21_9CETA	1	EGF domain-specific O-linked N-acetylglucosamine transferase OS=Bos taurus GN=EOGT PE=2 SV=1;Putative glycosyltransferase AER61 (Fragment) OS=Bos mutus GN=M91_09008 PE=4 SV=1	15	23	0.006	9	0.21	0.02	0.2	0.04	1.05	0.21	0.03	0.32	0.02	DSHCPYK+EDFVQSGEIGGYCK+EKNDSSLVCSR+GGKIRVTILAR+LNITQEGPKGGKIR+NDSSLVCSR+RVCFKEAIFSLLPR+TVSTFEVQIVDYK
11	sp|A0JND4|SBNO2_BOVIN tr|L8IW59|L8IW59_9CETA	1	Protein strawberry notch homolog 2 OS=Bos taurus GN=SBNO2 PE=2 SV=1;Protein strawberry notch-like protein 2 OS=Bos mutus GN=M91_07140 PE=4 SV=1	17	32	0.009	12	0.16	0.02	0.31	0.02	0.516129	0.19	0.02	0.29	0.02	AGFLIGDGAGVGK+DLHGPGVLER+DLHGPGVLERVER+DLRDIAAPGIAVHALSKIK+DMKQGLLSVGIGGR+EGQLDGFVSAAEGVFLSLIQK+FMSGEKLVAIISEASSSGVSLQADR+GLKWEEAYAR+GRTVAGVILENYLRGR+GRVVSRPDGTVAFESR+HHYMLCGALLR+IAAVMADVTSSSYLQIVR+ISKFLNR+LRHHYMLCGALLR+RGVGAMEIVAMDMK+RGVGAMEIVAMDMKVSGMYIAR+TFEEFLHAIEKR+TVAGVILENYLR+TVAGVILENYLRGR+VRGNKPSCLLAQQNR
12	sp|A0JNE3|NR2C1_BOVIN tr|F1N0I2|F1N0I2_BOVIN tr|L8HRT2|L8HRT2_9CETA	1	Nuclear receptor subfamily 2 group C member 1 OS=Bos taurus GN=NR2C1 PE=2 SV=1;Nuclear receptor subfamily 2 group C member 1 OS=Bos taurus GN=NR2C1 PE=3 SV=2;Nuclear receptor subfamily 2 group C member 1 OS=Bos mutus GN=M91_16243 PE=3 SV=1	16.8	8	0.003	5	0.13	0.03	0.38	0.05	0.342105	0.15	0.04	0.29	0.04	DKISAER+EGPLLSDSHVAFR+LQRCIAFGMKQDSVQCER+NLVYSCRGSK+NRCQYCRLQR+QFILTNHDGSTPNKVILAR+SPLAATPTFVTDSETAR+TYPDDTYRLSR
13	sp|A0JNH1|KIZ_BOVIN	1	Centrosomal protein kizuna OS=Bos taurus GN=KIZ PE=2 SV=2	27.2	18	0.004	0	-9	-9	-9	-9	1	-9	-9	-9	-9	AEINSGTAMSR+EKVVMRAEINSGTAMSR+ELCNHSDILREGPDAYR+GGSDKEQVR+IEFETQIKK+KMQLLSK+KMQLLSKDSLGK+LDQRTKATALLK+LKYIKLK+LSGVFLVSK+LSGVFLVSKLDQRTK+LYEYHQSDVCRAK+QFERIQANITASLEK+SAELHSPLWER+SGQHIAALK+SKAFWSESDESNSEIEAALRPR+TAVLHQLSQLCPR+TGSGTFKTKTTHK+TKATALLKK+TTDLKCDSSR
14	sp|A0JNI5|CLASR_BOVIN tr|L8IC10|L8IC10_9CETA	1	CLK4-associating serine/arginine rich protein OS=Bos taurus GN=CLASRP PE=2 SV=1;Splicing factor, arginine/serine-rich 16 OS=Bos mutus GN=M91_05712 PE=4 SV=1	18.2	15	0.003	3	0.23	0.01	0.22	0.04	1.04545	0.26	0.04	0.27	0.02	EKLSRPAASPAVGEK+ETGAAKPKLTPQEK+GGRGPRHHSSSR+GRRHSGGGSR+IKKDPAQFLQVHGR+KDPAQFLQVHGR+QATTYGMADGDFVR+QEREDELRAMAR+RHSGGGSRDGHR+RSPSESSSESRSR+SGDRYRR
15	sp|A0N0X6|LRRN1_BOVIN tr|L8IIB7|L8IIB7_9CETA	1	Leucine-rich repeat neuronal protein 1 OS=Bos taurus GN=LRRN1 PE=3 SV=1;Leucine-rich repeat neuronal protein 1 OS=Bos mutus GN=M91_04760 PE=4 SV=1	12.6	6	0.002	1	0.08	99.99	0.25	99.99	0.32	0.19	99.99	0.49	99.99	DGTADTKPTQVDTSR+DGTADTKPTQVDTSRSYYMW+IYVKQTESHSILVSWK+LSSEGTLEISKIQIEDSGR+LSYIHRLAFR+NPIHKIQEGDFKNMLR+TVESLPNLR
16	sp|A1A4I9|UFL1_BOVIN tr|L8IS41|L8IS41_9CETA	1	E3 UFM1-protein ligase 1 OS=Bos taurus GN=UFL1 PE=2 SV=1;E3 UFM1-protein ligase 1 OS=Bos mutus GN=M91_13298 PE=4 SV=1	22.6	31	0.011	17	0.13	0.01	0.33	0.01	0.393939	0.14	0.01	0.39	0.01	ARIRGLFSAITR+ATEGSGSVRGGGGSNAR+DLQEEVSNLYNNIR+ELQELSSSIKDLVLKSR+EMKNNPVHLITEEDLK+EMRDELHVRGGR+GTVVGGRQDK+IINGHIDLDNR+KATEGSGSVRGGGGSNAR+KPEITFMFQDEIEDFLR+KYQGLVVK+LGIPDAMSYIK+RLAADFQRAQFAEATQR+TQSTWVDSFLR
17	sp|A1A4J7-2|SMG8_BOVIN sp|A1A4J7|SMG8_BOVIN tr|F1MZ61|F1MZ61_BOVIN tr|L8I538|L8I538_9CETA	1	Isoform 2 of Protein SMG8 OS=Bos taurus GN=SMG8;Protein SMG8 OS=Bos taurus GN=SMG8 PE=2 SV=2;Protein SMG8 OS=Bos taurus GN=SMG8 PE=4 SV=1;Protein SMG8 OS=Bos mutus GN=M91_17962 PE=4 SV=1	24.3	17	0.004	7	0.15	0.02	0.41	0.06	0.365854	0.11	0.03	0.27	0.01	AFVGFEYEDSRGR+ARSTGACNCGR+DPESLLVPAPLSGSR+DPESLLVPAPLSGSRR+DWKLNCRPCPPR+EDEICVVGIFGKTALR+EEDPASPTGELTSK+FMCSGPDKVMKVMGSGPK+GFDDSVGR+GLLPKFSSWSLVKLGPAK+HQDPGDSGAGIR+LDHINFPVFEPSTPDPAPAK+NESSPAPPDADADK+NESSPAPPDADADKLK+NQDPAHPDKPK+NQLAQALR+QKVLPLLK+SAVVMGRGRR+TALRLNSEK+WISAASKLYEVAIDGK
18	sp|A1A4K3|DDB1_BOVIN tr|L8HPU4|L8HPU4_9CETA	1	DNA damage-binding protein 1 OS=Bos taurus GN=DDB1 PE=2 SV=1;DNA damage-binding protein 1 OS=Bos mutus GN=M91_19546 PE=4 SV=1	10.4	27	0.007	13	0.17	0.01	0.3	0.02	0.566667	0.21	0.02	0.29	0.02	DLLFILTAKYNACILEYK+DSAATTDEER+EEQMDGTVTLK+EEQMDGTVTLKDLR+EMLGGEIIPR+ETDDTLVLSFVGQTR+EVGMYGKIAVMELFRPK+GDFILVGDLMR+KVTLGTQPTVLR+LPSFELLHK+TKGDFILVGDLMR
19	sp|A1A4L0|SNX4_BOVIN tr|L8I1K5|L8I1K5_9CETA	1	Sorting nexin-4 OS=Bos taurus GN=SNX4 PE=2 SV=1;Sorting nexin-4 (Fragment) OS=Bos mutus GN=M91_06060 PE=4 SV=1	37.5	18	0.007	10	0.15	0.02	0.33	0.05	0.454545	0.11	0.02	0.33	0.04	DEGPGDGTMTENNFSLKK+EFVRNAWADIERFK+EGEQQLKSKNLEGR+HYSDELQSVISHLLR+HYSDELQSVISHLLRVR+IKMLEEQIK+KGIQVWTNAKECFSK+KHELMQYDLEMAAQDLASKK+KIEISVSEAEKR+KQQCEELATGTVR+LSADNMDPDFVER+LSADNMDPDFVERR+NAWADIERFKEQK+RTGRNAMNMQETYTAYLIETR+TGRNAMNMQETYTAYLIETR
20	sp|A2VDN5|SPAST_BOVIN tr|L8ISA3|L8ISA3_9CETA	1	Spastin OS=Bos taurus GN=SPAST PE=2 SV=1;Spastin (Fragment) OS=Bos mutus GN=M91_20402 PE=3 SV=1	36	32	0.007	6	0.21	0.02	0.34	0.02	0.617647	0.15	0.03	0.27	0.02	AFHKQAFEYISVALR+DAALGPIR+DPLTHASNSLPR+EGEHDASR+ELKPEQVKNMSASEMR+FSRALMAAKR+LQAKMMTNLVMAKDR+LVRALFAVAR+LVRALFAVARELQPSIIFIDEVDSLLCER+MMTNLVMAKDR+NLLCKQGSPLTQK+NLLCKQGSPLTQKELAQLAR+NLYYFSYPLFLGFALLR+NMSASEMR+NMSASEMRNIR+NMSASEMRNIRLSDFTESLK+QAFEYISVALR+RLKTEFLIEFDGVQSAGDDR+RNLYYFSYPLFLGFALLR+RSSGAAPASASPPAPVPGGEAER+RSVSPQTLEAYIR+SSGAAPASASPPAPVPGGEAER
21	sp|A2VDP6|NXPE3_BOVIN tr|L8IWV6|L8IWV6_9CETA	1	NXPE family member 3 OS=Bos taurus GN=NXPE3 PE=2 SV=1;Protein FAM55C (Fragment) OS=Bos mutus GN=M91_03020 PE=4 SV=1	21.5	23	0.005	6	0.16	0.01	0.23	0.02	0.695652	0.22	0.04	0.36	0.03	CHGPPIRFTTVFSSDLR+ETASATFIDSGGQFVSSQVIR+IHSPKLQAGAVGR+KVVYLFGDSTIR+KYGGDYLQARIHSPK+NQVDMFLSFVCPLET+NVGPFLAVDQKHNILLK+RAVVQLLDR+VVYLFGDSTIR
22	sp|A2VDR9|ZN750_BOVIN	1	Zinc finger protein 750 OS=Bos taurus GN=ZNF750 PE=2 SV=1	11.2	10	0.003	6	0.16	0.02	0.28	0.04	0.571429	0.21	0.05	0.28	0.03	DDIKENLDLHAR+DDIKENLDLHARGPHR+DGQRDTEGTKMSPR+EVGKGQQGSK+KNTEHPHSQAPENR+LQHSLAKDDIK+NSITLVSEQDR+NSITLVSEQDRVPK+NTEHPHSQAPENR+TSPREVGKGQQGSK
23	sp|A2VDS0|KPRB_BOVIN tr|L8J2W9|L8J2W9_9CETA	1	Phosphoribosyl pyrophosphate synthase-associated protein 2 OS=Bos taurus GN=PRPSAP2 PE=2 SV=1;Phosphoribosyl pyrophosphate synthase-associated protein 2 OS=Bos mutus GN=M91_01737 PE=4 SV=1	28.5	10	0.003	2	0.19	0.1	0.33	0.02	0.575758	0.22	0.06	0.22	0.06	DVNTTIMELLIMVYACKTSCAK+EIQGFFNIPVDNLR+EKPPITVVGDVGGR+GGLVLFSANSNSSCMELSK+GGLVLFSANSNSSCMELSKK+GSIVSKLLASMMCK+LQCPKIK+TVDISMTLSEAIR+TVDISMTLSEAIRR
24	sp|A2VDY4|CD027_BOVIN tr|L8IQR1|L8IQR1_9CETA	1	UPF0609 protein C4orf27 homolog OS=Bos taurus PE=2 SV=1;Uncharacterized protein (Fragment) OS=Bos mutus GN=M91_11000 PE=4 SV=1	19.9	5	0.002	2	0.19	0.06	0.39	0.09	0.487179	0.08	0.06	0.28	0.1	ELPETDASLR+LPLPEDFYHFWR+LVGPYDILAGK+NDVGYRELPETDASLR+NLFAEIIEAHLANR+TFHGAGLVVPVDKNDVGYR
25	sp|A2VDZ4|PLK4_BOVIN tr|L8HZU9|L8HZU9_9CETA	1	Serine/threonine-protein kinase PLK4 OS=Bos taurus GN=PLK4 PE=2 SV=1;Serine/threonine-protein kinase PLK (Fragment) OS=Bos mutus GN=M91_01154 PE=3 SV=1	18.4	14	0.005	4	0.15	0.03	0.3	0.02	0.5	0.17	0.02	0.37	0.03	DCLPKSAQLLK+DLTLSNLLLTRNMNIK+EAKDLIHQLLR+EEVKMYMNHANEGHR+KAMYKAGMVQR+LSLSSVLDHPFMSR+MIINSAASPK+MYMNHANEGHR+NMNIKIADFGLAAQLK+RLLIEQPLPNKMTIFPK+SGSAPFFPIIVGR+SGVEENER+TEDLIQVIEKTGR+VVLADYEMPTFLSR
26	sp|A2VE01|CLP1_BOVIN tr|L8IT02|L8IT02_9CETA	1	Polyribonucleotide 5'-hydroxyl-kinase Clp1 OS=Bos taurus GN=CLP1 PE=2 SV=1;Polyribonucleotide 5'-hydroxyl-kinase Clp1 OS=Bos mutus GN=CLP1 PE=3 SV=1	16.2	6	0.002	0	-9	-9	-9	-9	1	-9	-9	-9	-9	LADVFNQRCEVNR+NFLLIMDIR+NFLLIMDIRFMDLK+SGGVVERSKDFR+STVCRLLLNYAVRLGR+TEVAYVSK+TVLLPKSGGVVER
27	sp|A2VE39|CMTR1_BOVIN	1	Cap-specific mRNA (nucleoside-2'-O-)-methyltransferase 1 OS=Bos taurus GN=CMTR1 PE=2 SV=1	25.4	30	0.009	13	0.16	0.01	0.25	0.02	0.64	0.24	0.02	0.32	0.02	ASATSLSGSDSETEGK+ASATSLSGSDSETEGKQR+DIVEASNQKGR+DIVEASNQKGRR+DSYGKPLVKDR+GLGLTLQGFDQELNVNWR+GSSGTPKLSYTGRDDR+IIKGSSGTPK+ISAIHILDVLVLNGSDVR+LMAKMGFK+LMAKMGFKEGEGLGK+LNQLRNTDSDVNLVVPLEVIK+NDSECTAPLK+RRNDSECTAPLK+SVFDVLDGEEMRR+TGGHFICK+TRANPYEMIR+VHESQKPQDPDKLSK+WVKLDLKTELPR+YSMYNSVSQKLMAKMGFK
28	sp|A2VE53|IKIP_BOVIN	1	Inhibitor of nuclear factor kappa-B kinase-interacting protein OS=Bos taurus GN=IKBIP PE=2 SV=1	34.7	27	0.006	9	0.16	0.03	0.3	0.03	0.533333	0.17	0.03	0.31	0.04	ADQSTTSMAKDIGLK+DIGLKITTIKTDIR+DMKDEIKHISDMD+EKEIAFLKEK+INSVKKILSELQGDFNK+ITIRLGR+NEGGKSPEAR+NEGGKSPEARGGGGR+NIGDLLSSSIDRTAMLR+NTVKNIGDLLSSSIDR+SGTKGAPAEPGKR+TASENSQRINSVK+TASENSQRINSVKK
29	sp|A3FPG8|GPAT4_BOVIN tr|A6H7D4|A6H7D4_BOVIN tr|L8I747|L8I747_9CETA	1	Glycerol-3-phosphate acyltransferase 4 OS=Bos taurus GN=AGPAT6 PE=3 SV=1;1-acylglycerol-3-phosphate O-acyltransferase 6 (Lysophosphatidic acid acyltransferase, zeta) OS=Bos taurus GN=AGPAT6 PE=2 SV=1;Glycerol-3-phosphate acyltransferase 4 (Fragment) OS=Bos mutus GN=M91_18174 PE=4 SV=1	18.6	9	0.003	5	0.16	0.02	0.28	0.05	0.571429	0.24	0.05	0.27	0.04	DPTSLEEEIKEIR+EFLSKHVHLMCYR+LTEHVQDK+MIVGNHEDRSR+QAEEDAVQFANRVK+TLLKIFAWATLR+YDPQFGDAFWNSSK
30	sp|A3KMV1|SHKB1_BOVIN tr|L8IVR4|L8IVR4_9CETA	1	SH3KBP1-binding protein 1 OS=Bos taurus GN=SHKBP1 PE=2 SV=1;SH3KBP1-binding protein 1 OS=Bos mutus GN=M91_14237 PE=4 SV=1	23	27	0.007	7	0.13	0.02	0.34	0.03	0.382353	0.17	0.01	0.34	0.03	CQELVRSGPEPR+DNDLLVSELYR+GGGSFVER+GSLPSPSPR+GSPSPPQAEARR+ISTLKDETGAIFIDR+MAAAAPAVDGVPGR+NRHSLVGPQQAGGRPAPVR+RGGGSFVER+RLGSRPR+RRGGGSFVER+RSNTMPPNLGNAGLLGR+SNTMPPNLGNAGLLGR+SVDGSPTTAFTVLECEGSRRLGSRPR+VVPSASQLFVRLSSTGQR
31	sp|A3KMV5|UBA1_BOVIN tr|L8IE61|L8IE61_9CETA	1	Ubiquitin-like modifier-activating enzyme 1 OS=Bos taurus GN=UBA1 PE=2 SV=1;Ubiquitin-like modifier-activating enzyme 1 OS=Bos mutus GN=M91_07843 PE=3 SV=1	28.9	22	0.007	8	0.21	0.02	0.3	0.02	0.7	0.21	0.02	0.25	0.03	DDDTNFHMDFIVAASNLR+DNPGVVTCLDEAR+ERLDQPMTEIVSR+FEVQGLQPNGEEMTLKQFLDYFK+IIPAIATTTAAVVGLVCLELYKVVQGHR+ISFKSLPASLAEPDFVMTDFAK+KLAYVAAGDLAPINAFIGGLAAQEVMKACSGK+LAYVAAGDLAPINAFIGGLAAQEVMK+LAYVAAGDLAPINAFIGGLAAQEVMKACSGK+LDQPMTEIVSRVSKR+LEELKATLPSPEK+LGKQKYFLVGAGAIGCELLK+LKSDTAAAAVR+LQTSSVLVSGLR+MSSSPLSK+MYPIDFEKDDDTNFHMDFIVAASNLR+NRAEVSQPR+SDTAAAAVRQMNPHIRVTSHQNR+SIPICTLKNFPNAIEHTLQWAR+SLPASLAEPDFVMTD…
32	sp|A3KMV8|RBP10_BOVIN tr|F1MSI0|F1MSI0_BOVIN tr|L8IL11|L8IL11_9CETA	1	Ran-binding protein 10 OS=Bos taurus GN=RANBP10 PE=2 SV=1;Ran-binding protein 10 OS=Bos taurus GN=RANBP10 PE=4 SV=2;Ran-binding protein 10 OS=Bos mutus GN=M91_18259 PE=4 SV=1	33.7	14	0.005	6	0.18	0.01	0.28	0.04	0.642857	0.24	0.04	0.25	0.04	DGYMGIGLSAQGVNMNR+DKYNYIGLSQGNLRVHYK+ELQALSEQLGR+EPVCAALNSAILESQNLPK+IVSKGRDGYMGIGLSAQGVNMNR+LGEWQAVLQNMVSSYLVHHGYCATATAFAR+LMARAGLGSCSFARVDDYLH+LYPAVNQHETPLPR+MTETPIQEEQASIKNR+NHKDAASVR+QFVEMVNGTDSEVR+QPPLMLALGQASECLRLMAR+RQLCGGNQAATERIILFGR+YNYIGLSQGNLR
33	sp|A3KMW7|MAP10_BOVIN	1	Microtubule-associated protein 10 OS=Bos taurus GN=MAP10 PE=2 SV=1	23.8	11	0.003	5	0.23	0.08	0.22	0.04	1.04545	0.14	0.03	0.33	0.04	AGKDLKGR+DKLSVGENEK+EEGEGASPPRPSRSLCPAVAFR+ENQRDQNSMHNSKVIK+GSFPLCNR+GSFPLCNRDGER+ILRACDSSPGTENPK+KDKLSVGENEK+LLYGLTNTLK+LNCATEKTVDCDENR+NQTENLK+NSQHTSTSSETRLSIR+NSSAKSSILSPPFSAGSPVLSHK+QDHDISAKPK+RIGDIALGYR+SLEEASSSDFSSSQWTEEK+SSILSPPFSAGSPVLSHK+TRTGCKSSEK+VLGFAAPGSSQSHRGSFPLCNR
34	sp|A3KMX8|ARMT1_BOVIN tr|F1MC76|F1MC76_BOVIN tr|L8IS35|L8IS35_9CETA	1	Protein-glutamate O-methyltransferase OS=Bos taurus GN=ARMT1 PE=2 SV=1;Uncharacterized protein OS=Bos taurus GN=C9H6orf211 PE=4 SV=1;Uncharacterized protein OS=Bos mutus GN=M91_14730 PE=4 SV=1	7.9	5	0.002	3	0.13	0.05	0.26	0.03	0.5	0.16	0.05	0.4	0.07	DVGSFAYLSVKDR+GDLNYRKLTGDR+KAISLLSKLR
35	sp|A3KMY4|CTL4_BOVIN tr|L8HPJ8|L8HPJ8_9CETA	1	Choline transporter-like protein 4 OS=Bos taurus GN=SLC44A4 PE=2 SV=1;Choline transporter-like protein 4 OS=Bos mutus GN=M91_14113 PE=4 SV=1	18.1	11	0.003	4	0.13	0.02	0.34	0.05	0.382353	0.17	0.03	0.33	0.03	DIPTFPLGSAFLR+ICIAIALLKEASR+LLVVGGVGVLSFFFFTGR+NAYIMIAIYGK+NAYIMIAIYGKNFCVSAK+NAYIMIAIYGKNFCVSAKNAFMLLMR+NDGSADRPYYMSKSLLK+NIVRVVVLDKVTDLLLFFGK+QFSQTVEQVFYAANR
36	sp|A4FUD3|U5S1_BOVIN tr|F1N6D5|F1N6D5_BOVIN tr|L8I6F5|L8I6F5_9CETA	1	116 kDa U5 small nuclear ribonucleoprotein component OS=Bos taurus GN=EFTUD2 PE=2 SV=1;116 kDa U5 small nuclear ribonucleoprotein component OS=Bos taurus GN=EFTUD2 PE=4 SV=1;116 kDa U5 small nuclear ribonucleoprotein component OS=Bos mutus GN=M91_16926 PE=4 SV=1	21.8	11	0.004	5	0.25	0.03	0.21	0.04	1.19048	0.22	0.03	0.28	0.03	EELKLNIRPLLR+FFDDPMLLELAK+FNTTSVIKIAVEPVNPSELPKMLDGLR+FTKKAPTSSSQR+GGGQIIPTARR+GNEEAQIFRPLKFNTTSVIK+IAVEPVNPSELPKMLDGLR+ILAQVVGDVDTSLPR+KRYDQDLCYTDILFTEQER+LAVTVCINK+LILELKLPPTDAYYK+LNIRPLLR+LWGDIYFNPK+NKITMIAEPLEK+NVKFKILDAVVAQEPLHR+NVTLCGHLHHGK+SYPSLTTK+TATITEPR
37	sp|A4FUF0-2|GLYR1_BOVIN sp|A4FUF0|GLYR1_BOVIN tr|L8J435|L8J435_9CETA tr|M5FK22|M5FK22_BOVIN	1	Isoform 2 of Putative oxidoreductase GLYR1 OS=Bos taurus GN=GLYR1;Putative oxidoreductase GLYR1 OS=Bos taurus GN=GLYR1 PE=2 SV=1;Putative oxidoreductase GLYR1 OS=Bos mutus GN=M91_05059 PE=4 SV=1;Putative oxidoreductase GLYR1 OS=Bos taurus GN=GLYR1 PE=4 SV=1	22.7	7	0.002	2	0.22	0.03	0.24	0.03	0.916667	0.26	0.05	0.26	0.05	DLSIPESSTVKGMMAGPMATFK+DQTSSHSSADDKNR+DQTSSHSSADDKNRR+EEMIKINK+RVPSGSSERGSK+VPSGSSER+VPSGSSERGSK+VPSGSSERGSKSPLK
38	sp|A4FUZ5|SERC3_BOVIN tr|L8I429|L8I429_9CETA	1	Serine incorporator 3 OS=Bos taurus GN=SERINC3 PE=2 SV=1;Serine incorporator 3 OS=Bos mutus GN=M91_07792 PE=4 SV=1	19.4	8	0.003	2	0.36	0.14	0.18	0.04	2	0.2	0.01	0.22	0.09	DTAANGASDEEDGRPR+ECDVLVRYKAVYR+IPGFCDEGLSTRITDIMDKECDVLVR+ISFALAVFFFAFSLLMLNVK+ITDIMDKECDVLVR+KIPGFCDEGLSTR+LTLSGSDSVILR+NSSNSQVSKLTLSGSDSVILR
39	sp|A4FV61|ZN512_BOVIN tr|L8IJD2|L8IJD2_9CETA	1	Zinc finger protein 512 OS=Bos taurus GN=ZNF512 PE=2 SV=1;Zinc finger protein 512 (Fragment) OS=Bos mutus GN=M91_00187 PE=4 SV=1	24.9	37	0.013	23	0.17	0.01	0.31	0.01	0.548387	0.14	0.01	0.35	0.01	AGDEIDEPSER+AGDEIDEPSERERLR+DMSLESKSGGR+EPEQEPVPTQFQKVR+GSVSCPTCQAVGR+IKSAAASHVEGPGGVSTKGK+NHEELLVATSR+QEEDEDYR+QLRSLAGMKYHVMANHNSLPILK+QRPKAQPNPK+SAAASHVEGPGGVSTK+TVLKRLGK
40	sp|A4FV84|MRT4_BOVIN tr|L8HRX1|L8HRX1_9CETA	1	mRNA turnover protein 4 homolog OS=Bos taurus GN=MRTO4 PE=2 SV=1;mRNA turnover protein 4-like protein OS=Bos mutus GN=M91_20686 PE=3 SV=1	42.3	9	0.003	6	0.18	0.03	0.28	0.03	0.642857	0.2	0.03	0.3	0.03	EGDVLTPEQAR+KVSLTKTAK+LFGYEMAEFKVSIKYMWDAQSGR+LRGEVGLLFTNR+MFFGKNKVMMVALGR+NAWKHSR+NKVMMVALGR+NSKLKDIR+QLGLPTALK+VMMVALGRSPSDEYK
41	sp|A4IF62|RPC1_BOVIN	1	DNA-directed RNA polymerase III subunit RPC1 OS=Bos taurus GN=POLR3A PE=2 SV=1	25.5	20	0.008	8	0.22	0.03	0.28	0.04	0.785714	0.21	0.01	0.27	0.01	AEALVLMGTKANLVTPR+AVIHIDEQSGK+DEPLEFKRVLDNIK+DRPCETCGK+DWGQNEAADAMSR+DWGQNEAADAMSRLAR+ELDKSNSPLTMALCGSK+FRGNLSGK+GEVLGITRFGIAKMK+ILTFPEKVNKANINFLR+ITPTQIEKFLETCRDK+KISHICFGMKSAEEMR+LLHKANRDPSPPR+LLVEGDNLR+LRVKPGDVAVHGEAVVCVTPRENSK+LVKSLEDLCSQYDLTVR+MGTSEKDRPCETCGK+MKESVLMLASFEK+NELLLSAESIMKK+QFLDYLKRPGLTYLQKR+QGRFRGNLSGK+QIFSVILRPSDDNPVRANLR+SGTNEDDLTMK+SNSPLTMALCGSK+TFHFAGVASMNITLGVPR+TKGKQYCGR+…
42	sp|A4IF63|TRIM2_BOVIN tr|L8I1X2|L8I1X2_9CETA	1	Tripartite motif-containing protein 2 OS=Bos taurus GN=TRIM2 PE=2 SV=1;Tripartite motif-containing protein 2 (Fragment) OS=Bos mutus GN=M91_19236 PE=4 SV=1	17.5	13	0.004	6	0.24	0.04	0.25	0.05	0.96	0.14	0.07	0.25	0.05	ACCVFIFQPNGKIVTR+ASLQVQLDAANRR+ENPIEDDLIFRVGTKGR+FKTKIGSGK+GVAALQNNFFITNLMDVLQR+IGSGKLMGPK+NKGEFTNLQGVAASTNGK+QTSILPEKGVAALQNNFFITNLMDVLQR+SADVSPTTEGVK+SADVSPTTEGVKRR+VKSPGSGHVK
43	sp|A4IF87|GNPAT_BOVIN tr|G3X6V2|G3X6V2_BOVIN tr|L8IUI7|L8IUI7_9CETA	1	Dihydroxyacetone phosphate acyltransferase OS=Bos taurus GN=GNPAT PE=2 SV=1;Dihydroxyacetone phosphate acyltransferase (Fragment) OS=Bos taurus GN=GNPAT PE=4 SV=1;Dihydroxyacetone phosphate acyltransferase (Fragment) OS=Bos mutus GN=M91_14825 PE=4 SV=1	24.8	11	0.004	5	0.1	0.03	0.36	0.03	0.277778	0.11	0.03	0.4	0.02	DFEEGCYLLCKSEAIQVMTR+ESTTGLLKARR+EVFDTYLVPISISYDR+FGNIHVYFGDPVSLRSLAAGRMGR+IFKQIFSKVR+ILEETLYAYELLGVPKPK+LYWAVFSEYVKTMLR+MSGAFFMRR+MVGELLRMSGAFFMR+MVGELLRMSGAFFMRR+NALAAFVR+SLAAGRMGR+TMLRNGYAPVEFFLEGTRSR+VRVNEEGIQKLQR
44	sp|A4IF89|EXOC8_BOVIN tr|L8IWZ7|L8IWZ7_9CETA	1	Exocyst complex component 8 OS=Bos taurus GN=EXOC8 PE=2 SV=1;Exocyst complex component 8 OS=Bos mutus GN=M91_14824 PE=4 SV=1	21.5	12	0.004	3	0.17	0.01	0.29	0.02	0.586207	0.24	0.01	0.3	0.05	DGSGPGEEGK+DGSGPGEEGKQR+DMFKLLMFPESR+DNPPMKDMFK+DQLRGQTGFFPSPGGASR+GGPKATRR+GQTGFFPSPGGASRDGSGPGEEGKQR+HRNSEEMWR+IFQAENAK+LGQCTKACELFLR+MAMAMSDSGASRLR+MNLMTPEALGKLK+QRIQALAEETAQNLKR+QTMGFLEEALK+YNALYPLDGLAVVNVK
45	sp|A4IF98|RMI1_BOVIN tr|L8IGW3|L8IGW3_9CETA	1	RecQ-mediated genome instability protein 1 OS=Bos taurus GN=RMI1 PE=2 SV=1;RecQ-mediated genome instability protein 1 OS=Bos mutus GN=M91_15989 PE=4 SV=1	10.7	6	0.002	1	0.15	99.99	0.32	99.99	0.46875	0.25	99.99	0.28	99.99	AMVLALQDVNTDHLENLKRR+EQMETKELQLLTLNR+LLPSGILETPK+SSETYKIKQISSSDGHSLNNK
46	sp|A4IFA3|GT2D2_BOVIN tr|F1MS50|F1MS50_BOVIN tr|L8IQZ2|L8IQZ2_9CETA	1	General transcription factor II-I repeat domain-containing protein 2 OS=Bos taurus GN=GTF2IRD2 PE=2 SV=1;General transcription factor II-I repeat domain-containing protein 2 OS=Bos taurus GN=GTF2IRD2 PE=4 SV=1;General transcription factor II-I repeat domain-containing protein 2 OS=Bos mutus GN=M91_01079 PE=4 SV=1	24.6	25	0.007	10	0.19	0.01	0.28	0.02	0.678571	0.22	0.02	0.3	0.02	ALGTAAMVPVPYEK+DEKLQELKEGLR+DLAFLVDMTMHLNTLNISLQGHSQIVTQMYDLIR+DSQWDSVLHIST+KFGEAIGVDFPVK+KYLLGSSDTVCPEQK+LCLWETHLAR+LQELKEGLRK+LSSLEKIKQLR+MVVTFLVSALESMCKELAKSK+QVDSGETEILR+QVFAKVNPR+SGNEIFLRVEK+SGNEIFLRVEKSLK+SKAEVACIAMYEADVFVIGTEK+SKVAMVCKGSDLK+TEPMEDSGISLK+TKYDKVGIPEFYK
47	sp|A4IFA7|CBR4_BOVIN tr|L8IRI0|L8IRI0_9CETA	1	Carbonyl reductase family member 4 OS=Bos taurus GN=CBR4 PE=2 SV=1;Carbonyl reductase family member 4 OS=Bos mutus GN=M91_10996 PE=3 SV=1	38	21	0.007	10	0.17	0.01	0.34	0.01	0.5	0.17	0.01	0.3	0.02	DLNEELLK+GGLVGFSRALAK+GGLVGFSRALAKEVAK+GIGRAVAR+GSIVNVGSVVGLK+LAIVARNLEGAR+LMAQRGYRLAIVAR+NLGRVNFLVNAAGINR+VCAVFGGSRGIGR
48	sp|A4IFD8|MET14_BOVIN tr|F1MNV7|F1MNV7_BOVIN tr|L8IE29|L8IE29_9CETA	1	N6-adenosine-methyltransferase subunit METTL14 OS=Bos taurus GN=METTL14 PE=2 SV=1;N6-adenosine-methyltransferase subunit METTL14 OS=Bos taurus GN=METTL14 PE=4 SV=2;Methyltransferase-like protein 14 (Fragment) OS=Bos mutus GN=M91_05318 PE=4 SV=1	13.6	12	0.003	5	0.15	0.01	0.3	0.04	0.5	0.2	0.04	0.31	0.04	GGAHRGGFPPR+GGGAPRGGGR+GGGAPRGGGRGGTSAGR+GGGRGGTSAGR+GGGRGGTSAGRGR+GGTSAGRGR+NRSNFRGER+TKTLDPKAVFQR+TNKNNPGK
49	sp|A4IFJ5|PA24A_BOVIN tr|L8I8A2|L8I8A2_9CETA	1	Cytosolic phospholipase A2 OS=Bos taurus GN=PLA2G4A PE=1 SV=1;Phospholipase A2 OS=Bos mutus GN=M91_05907 PE=4 SV=1	20.4	8	0.003	4	0.21	0.04	0.25	0.04	0.84	0.18	0.01	0.34	0.01	AGKVHNFMLGLNLNTSYPMSPLR+DVPVVAILGSGGGFR+DVPVVAILGSGGGFRAMVGFSGVMK+GPEEINKELMK+GTEHEEAER+MLMALVSDSALFNTREGR+MLMALVSDSALFNTREGRAGK+MNTTLSSLK+NSEGLHSTR+RLHDLMYFNTLNNIDVIK+RQNPSRCSVSLSSVEAR+YKAPGVPRETNEEK
50	sp|A4IFQ0-2|THOC5_BOVIN sp|A4IFQ0|THOC5_BOVIN tr|F1MS93|F1MS93_BOVIN tr|L8J0G7|L8J0G7_9CETA	1	Isoform 2 of THO complex subunit 5 homolog OS=Bos taurus GN=THOC5;THO complex subunit 5 homolog OS=Bos taurus GN=THOC5 PE=2 SV=1;THO complex subunit 5 homolog OS=Bos taurus GN=THOC5 PE=4 SV=1;THO complex subunit 5-like protein OS=Bos mutus GN=M91_07599 PE=4 SV=1	12.7	9	0.003	5	0.18	0.01	0.33	0.01	0.545455	0.17	0.03	0.29	0.04	DAAVEIEDR+ECLSNKEK+GGKDAAVEIEDR+HPLSVLLDLKCK+LFRGPSR+LMAEIQDLKSRGGK+RRPTLGVQLDDKR+TNNNDDNIR+YYSEEAEVDLRDPGR
51	sp|A5D794|GAPD1_BOVIN	1	GTPase-activating protein and VPS9 domain-containing protein 1 OS=Bos taurus GN=GAPVD1 PE=2 SV=1	16.1	17	0.005	4	0.16	0.04	0.31	0.03	0.516129	0.13	0.01	0.37	0.06	CRQGLQTTQAHLER+DIKQEER+DMMGLTDDR+DSSRGETEERK+EVSSRPSTPGLSVVSGISATSEDIPNK+KDSDDEKSDR+KFEIRDMMGLTDDR+LAFYPNQDGDILR+LQELESCSGLGSTSDDTDVR+LRENPRLIASSLVAGEK+LVALVNKFIGYLK+LYVNSEK+QERLYVNSEKQLIQR+QGLQTTQAHLER+QLGFQETAYGEFLSR+RFVSAMPKDDPSPR+SCVAAFLDVVIGGR+SSLGKFDKSCVAAFLDVVIGGR+TAEKLYRTAWIAK+TISAYKTPR+TKSSLGKFDK
52	sp|A5D7B7|SEPR_BOVIN tr|L8IGJ9|L8IGJ9_9CETA	1	Prolyl endopeptidase FAP OS=Bos taurus GN=FAP PE=1 SV=1;Seprase (Fragment) OS=Bos mutus GN=M91_05758 PE=4 SV=1	16.4	10	0.002	2	0.12	0.01	0.38	0.06	0.315789	0.18	0.02	0.3	0.1	EGIVIALVDGR+ELENALKNIQLPK+FMGLPTKDDNLK+LGVYEVEDQITAVR+LLYAVYRKLGVYEVEDQITAVR+NIYRISIGSHSPSKK+NSTVMARAEYFR+RNELPRPIQYLCWSPVGSK+VTQDSLFYSSNEFEGYPGRR
53	sp|A5D7F5|DJC27_BOVIN tr|L8ILK8|L8ILK8_9CETA	1	DnaJ homolog subfamily C member 27 OS=Bos taurus GN=DNAJC27 PE=2 SV=1;DnaJ-like protein subfamily C member 27 OS=Bos mutus GN=M91_00135 PE=4 SV=1	38.5	10	0.003	5	0.16	0.01	0.33	0.01	0.484848	0.15	0.01	0.35	0.02	CVAPGSEDAFKAVVNARTALLK+DREIKVNIFDMAGDPFFYEVR+DSWDMLGVKPGASR+EQADTIRR+IDCTKHRCVDESEGR+IRSSKDSWDMLGVKPGASR+QDLGPHGNMENIVFAVCANKIDCTK
54	sp|A5D7H3|CTL2_BOVIN tr|L8IUC1|L8IUC1_9CETA	1	Choline transporter-like protein 2 OS=Bos taurus GN=SLC44A2 PE=2 SV=1;Choline transporter-like protein 2 OS=Bos mutus GN=M91_04923 PE=4 SV=1	15.2	8	0.003	4	0.24	0.03	0.25	0.03	0.96	0.21	0.02	0.29	0.02	DGDCPAVLIPSKPFAQR+KNITELVEGAK+LLIVGSVGILAFFFFTHR+NDGTPERPYFMSLTLK+NITELVEGAK+NITELVEGAKKASGILEAR+TNKRQAEA+VIYPTDSR+YHTGSLAFGSLLLAIVQVIR
55	sp|A5D7I0|T10IP_BOVIN	1	Testis-specific protein 10-interacting protein OS=Bos taurus GN=TSGA10IP PE=2 SV=2	31.5	23	0.007	16	0.12	0.02	0.31	0.02	0.387097	0.15	0.02	0.36	0.02	DMEGAPRRHR+EQRVQHQVAR+EQRVQHQVARCLAAYAPR+LESVSSSTNLR+LQQELDCGPEKQPWKSLR+NSGEEAWEESEVRR+QQLRACSCTSIPPGR+QQLRACSCTSIPPGRGTSQELEPSGEGGLQSPR+QQTPGTATGLLK+QRSRSAGQTPK+RFSQVLSALGLDEEQLLAK+RLESVSSSTNLR+TEEPNLERRQQLR+VQARPYLFQQAMQANAR+VQHQVARCLAAYAPRGSR
56	sp|A5D7J5|RHOU_BOVIN	1	Rho-related GTP-binding protein RhoU OS=Bos taurus GN=RHOU PE=2 SV=1	18.8	11	0.002	2	0.21	0.05	0.28	0.05	0.75	0.22	0.07	0.26	0.03	AGGPEGHGVK+ERGVRGPGAPGGR+GPGAPGGRGR+MPPQQGDPAFPGR+MPPQQGDPAFPGRCEAPPVPPRR
57	sp|A5D7K8|PD2R_BOVIN tr|L8IMD1|L8IMD1_9CETA	1	Prostaglandin D2 receptor OS=Bos taurus GN=PTGDR PE=2 SV=1;Prostaglandin D2 receptor OS=Bos mutus GN=M91_14394 PE=4 SV=1	14.7	8	0.003	6	0.19	0.02	0.29	0.02	0.655172	0.21	0.03	0.29	0.03	GAMVAPVVGAFCLAFCALPLVGFGK+NLYAMHLR+NLYAMHLRLR+SGLGSCPPR+TSVFRMFFR
58	sp|A5D7L8|PERM1_BOVIN tr|L8IZI9|L8IZI9_9CETA	1	PGC-1 and ERR-induced regulator in muscle protein 1 OS=Bos taurus GN=PERM1 PE=2 SV=1;Uncharacterized protein OS=Bos mutus GN=M91_10943 PE=4 SV=1	8.2	24	0.005	7	0.19	0.03	0.29	0.02	0.655172	0.25	0.03	0.24	0.03	GSGAWDSVAVGPR+GSGAWDSVAVGPRSPQPR+HLPPPAPSASMGPGR+ILKHLPPPAPSASMGPGR+RTAGTKAGGR+TAGTKAGGR+TSDLHAPDAWK+TVLLANIGTISAIR+TVLLANIGTISAIRYFR
59	sp|A5D7M3|GAS8_BOVIN tr|F1MYR3|F1MYR3_BOVIN tr|L8IR06|L8IR06_9CETA	1	Growth arrest-specific protein 8 OS=Bos taurus GN=GAS8 PE=2 SV=1;Growth arrest-specific protein 8 OS=Bos taurus GN=GAS8 PE=4 SV=1;Growth arrest-specific protein 8 (Fragment) OS=Bos mutus GN=M91_08259 PE=4 SV=1	35.8	19	0.007	9	0.12	0.02	0.31	0.03	0.387097	0.2	0.02	0.32	0.03	AEGTVVMKLAQK+AQEGTLRRDMR+DELDLRRK+DKQILVCTKAR+DLQYELARVCKAHNDLLR+DREREER+ELKSLRWEHEVLEQR+EMTEVAMQNR+EQELANEVMVKNLR+KNGQITTLMQR+LKVTEKELK+MKMLRDELDLR+MLRDELDLRR+MRNDFERQVR+NDFERQVREIEAK+NYYNDITLNNLALINSLK+RLADPLQKAR
60	sp|A5D7N9|MS18A_BOVIN tr|L8IND2|L8IND2_9CETA	1	Protein Mis18-alpha OS=Bos taurus GN=MIS18A PE=2 SV=1;Protein Mis18-alpha OS=Bos mutus GN=M91_17683 PE=4 SV=1	26.8	6	0.002	3	0.19	0.06	0.28	0.01	0.678571	0.19	0.01	0.3	0.06	LSEDSSRHQLLQKWASMWSSVSGDASAACPER+QMEDVLKALQTK+SKWGDSSLLGR+VEIEKSLKQMEDVLK+WASMWSSVSGDASAACPER+WGDSSLLGR
61	sp|A5D7R8|KITH_BOVIN tr|L8HMW2|L8HMW2_9CETA	1	Thymidine kinase, cytosolic OS=Bos taurus GN=TK1 PE=2 SV=1;Thymidine kinase OS=Bos mutus GN=M91_08209 PE=3 SV=1	28.6	4	0.002	2	0.21	0	0.28	0.01	0.75	0.25	0.04	0.25	0.04	ASGQPAVLDSEENK+CLVIKYAKDTR+ENCPMTLGKPAEAPGVR+EVEVIGGADK+TRGQIQVILGPMFSGK
62	sp|A5D7U4|SCNNB_BOVIN tr|M0QSG5|M0QSG5_9CETA	1	Amiloride-sensitive sodium channel subunit beta OS=Bos taurus GN=SCNN1B PE=2 SV=1;Amiloride-sensitive sodium channel subunit beta (Fragment) OS=Bos mutus GN=M91_12532 PE=3 SV=1	14.4	26	0.004	5	0.18	0.01	0.3	0.02	0.6	0.18	0.01	0.33	0.01	DLDELMEAVLGR+DLDELMEAVLGRILGPELSQVNDTR+DQSSNITLSRK+GEPYSQCTK+LILDMGQEDYVPFLTSTAGAR+LQPLDVIESDSEGDAI+LQRKGEPYSQCTK+VQHLLKDLDELMEAVLGR
63	sp|A5D7V9|SYHM_BOVIN tr|F1N0T6|F1N0T6_BOVIN tr|L8IDG1|L8IDG1_9CETA	1	Probable histidine--tRNA ligase, mitochondrial OS=Bos taurus GN=HARS2 PE=2 SV=1;Probable histidine--tRNA ligase, mitochondrial OS=Bos taurus GN=HARS2 PE=3 SV=1;Putative histidyl-tRNA synthetase, mitochondrial OS=Bos mutus GN=M91_15344 PE=3 SV=1	36.6	9	0.003	3	0.22	0.03	0.28	0.01	0.785714	0.23	0.03	0.27	0.01	AWTVLLGLLRPPPGALCIR+DLSPQQMVVREK+DQGGELLSLR+EFYQCDFDIAGQFDPMIPDAECLK+EILTEKYGEDSGLIYDLKDQGGELLSLR+ENLVAEIQK+ESPTIVQGRYR+IFSIVEQR+IKTFGEKIR+IMCEILSGLHLGDFLIKVSDR+IRTTETQVFVATPQK+ISWKDVR+LIAELWDAGIK+LIYDLKDQGGELLSLR+LRSVASREEVAIK
64	sp|A5D9D4|MSTO1_BOVIN tr|L8IGN5|L8IGN5_9CETA	1	Protein misato homolog 1 OS=Bos taurus GN=MSTO1 PE=2 SV=2;Protein misato-like protein 1 OS=Bos mutus GN=M91_20880 PE=4 SV=1	18.2	34	0.008	11	0.14	0.01	0.31	0.03	0.451613	0.2	0.02	0.31	0.02	DLSKLDLR+EPPGELCPDVLYR+EPPGELCPDVLYRTGR+GSLSSLKQEGGLYR+LEAFGQGESILK+LRSSPVSMVHLADMLNFSGK+LRSSPVSMVHLADMLNFSGKK+LSKLDLR+LTTHKEELYPK+SSSHLLLTPCK+TGRTLHGQETYTPR
65	sp|A5PJS6|UBP10_BOVIN tr|L8IQY2|L8IQY2_9CETA	1	Ubiquitin carboxyl-terminal hydrolase 10 OS=Bos taurus GN=USP10 PE=2 SV=1;Ubiquitin carboxyl-terminal hydrolase 10 (Fragment) OS=Bos mutus GN=M91_18154 PE=4 SV=1	20.3	12	0.003	4	0.21	0.02	0.27	0.03	0.777778	0.18	0.03	0.32	0.01	IDDQTVKVVSQQQVVRPAAER+IRTVQDALESLVAR+LMNEFTNMPVPPKPR+NIEYPVDLEISKELLSPGVKNK+NKTSVTR+QADFVQTPITGIFGGHIR+QALGDKIVR+QYIFGDFSPDEFNQFFVTPR+TGGCQKLIK+TRQEVEISRR+TVQDALESLVAR+VQRPCTSTPMIDSFVR
66	sp|A5PJX7|S6A13_BOVIN	1	Sodium- and chloride-dependent GABA transporter 2 OS=Bos taurus GN=SLC6A13 PE=2 SV=1	10.6	5	0.002	4	0.19	0.03	0.31	0.04	0.612903	0.15	0.03	0.32	0.01	AAEDGALQR+DLPQGHREGPSAPATPRTSLLILTELEPHH+GSFRERVR+ISEGIQHLGALR+LSTLKGSFR+TSLLILTELEPHH
67	sp|A5PJZ1|SCMC1_BOVIN tr|L8IT82|L8IT82_9CETA	1	Calcium-binding mitochondrial carrier protein SCaMC-1 OS=Bos taurus GN=SLC25A24 PE=2 SV=1;Calcium-binding mitochondrial carrier protein SCaMC-1 (Fragment) OS=Bos mutus GN=M91_01648 PE=3 SV=1	20.1	11	0.003	3	0.19	0.01	0.32	0.01	0.59375	0.15	0.02	0.33	0.01	DGKLDFEEFMK+DIEEIIR+EGLPGLYR+ILSKEGLPGLYR+ILSKEGLPGLYRGITPNFMK+LKVMMQVHGSK+MKLAFKSLDK+MQAQAMIEK+SLWRGNGTNVIKIAPETAVK+TSTAPLDRLKVMMQVHGSK+VMMQVHGSK
68	sp|A5PJZ5|NUP93_BOVIN tr|L8ICW7|L8ICW7_9CETA	1	Nuclear pore complex protein Nup93 OS=Bos taurus GN=NUP93 PE=2 SV=1;Nuclear pore complex protein Nup93 OS=Bos mutus GN=M91_00045 PE=4 SV=1	28.3	52	0.015	14	0.15	0.02	0.3	0.03	0.5	0.17	0.02	0.29	0.03	ASVLLGSRGLDISHISQR+AVYCIIGR+CGDLLAASQVVNR+DNALLSAIEESR+DSQGENMFLR+GLDISHISQR+KFESTDPR+KRTFGMAEEYHR+LKNMALSIAER+LKNMALSIAERYR+LLSPIVPQISAPQSNK+LNFVRLLMLYTR+LYDLAKNADK+NADKVLELMNK+NISDMWAMVK+NNTDPYKRAVYCIIGR+NSVEVRMEFVR+QMTDVLLVPATDALK+QMTDVLLVPATDALKSR+RLKGTSPSSATRPQR+RLSPATENKLR+TFGMAEEYHR+TLTRTSQETADVK+TSGDTNAR
69	sp|A5PK23|MED26_BOVIN tr|L8I749|L8I749_9CETA	1	Mediator of RNA polymerase II transcription subunit 26 OS=Bos taurus GN=MED26 PE=2 SV=1;Mediator of RNA polymerase II transcription subunit 26 (Fragment) OS=Bos mutus GN=M91_13776 PE=4 SV=1	20.1	18	0.005	5	0.13	0.01	0.35	0.03	0.371429	0.14	0.01	0.37	0.02	AGFSPDSSKADSDAASSGGSDSK+EALEETRLGK+GSLPSPSPR+LCGQRLDR+LCGQRLDRLGSR+LEHGENDKHSGK+NDMPRLCGQR+NDMPRLCGQRLDR+NEELAKR+NMVAVQEVISSLEK+QIKPLTQKEPVR+QIKPLTQKEPVRADSPVHTEQPR
70	sp|A5PK45|GT251_BOVIN tr|L8IEC5|L8IEC5_9CETA	1	Procollagen galactosyltransferase 1 OS=Bos taurus GN=COLGALT1 PE=2 SV=1;Procollagen galactosyltransferase 1 (Fragment) OS=Bos mutus GN=M91_16397 PE=4 SV=1	24.3	10	0.003	5	0.18	0.04	0.33	0.02	0.545455	0.15	0.03	0.29	0.04	AMNTSQVEALGIQMLPGYR+EGLDWDLIYVGR+EQQALSREAK+EVYGFLPVPLR+MGFDEVFMINLKRR+NSDVLQSPLDSAAR+RMQVEHPEKAVPR+TPAYIPIRKR+TPDKMGFDEVFMINLKR+VRNLVEADYSYWTLAYVISLQGARK
71	sp|A5PKF5|THA11_BOVIN tr|L8IJZ0|L8IJZ0_9CETA	1	THAP domain-containing protein 11 OS=Bos taurus GN=THAP11 PE=2 SV=1;THAP domain-containing protein 11 OS=Bos mutus GN=M91_18256 PE=4 SV=1	23.8	13	0.004	5	0.18	0.02	0.23	0.01	0.782609	0.16	0.02	0.42	0.02	DILALMEVKMK+DRLLAMAVIR+EMKGSIRHLR+HLRLTEAKLR+LCSVHFQGGRKTYTVR+LNEQRDILALMEVKMK+LTEAKLR+VARRPAGAAAAR+VARRPAGAAAARR
72	sp|A6H750|KIF2B_BOVIN tr|F1N0Y3|F1N0Y3_BOVIN	1	Kinesin-like protein KIF2B OS=Bos taurus GN=KIF2B PE=2 SV=1;Kinesin-like protein OS=Bos taurus GN=KIF2B PE=3 SV=1	20.4	11	0.003	3	0.21	0.06	0.28	0.02	0.75	0.27	0.04	0.21	0.05	ARDADTGNAHYEIR+ARDADTGNAHYEIRR+ASRSVSLAPPSVIGDQR+ATCFAYGQTGSGK+ECIRALGQNK+EMPRVLENHIRNSEMSLQGDEFIR+GMATCFAYGQTGSGK+HGMATCFAYGQTGSGK+ISGPEPRDGR+ISGPEPRDGRR+KRPLNRQEATR+QEATREDLDIVTIPSDNVVMVHESK+REMPRVLENHIR+TDGRIHLAVVTEVR
73	sp|A6H754-2|CD37L_BOVIN sp|A6H754|CD37L_BOVIN tr|L8ISH5|L8ISH5_9CETA	1	Isoform 2 of Hsp90 co-chaperone Cdc37-like 1 OS=Bos taurus GN=CDC37L1;Hsp90 co-chaperone Cdc37-like 1 OS=Bos taurus GN=CDC37L1 PE=2 SV=2;Hsp90 co-chaperone Cdc37-like 1 OS=Bos mutus GN=M91_11902 PE=4 SV=1	31	7	0.002	3	0.16	0.02	0.27	0.05	0.592593	0.22	0.09	0.31	0.06	ETEDEDKSKSFMQK+GALMEQIAHQAVVMQFIMEMAK+IRHFGMLSR+KETEDEDKSK+LGSLALHNSESLDQEHAK+NCNVDPRGCFR+NELEAFK+NELEAFKSR+QKEEALVQR+QKEEALVQRER
74	sp|A6H759|LRC72_BOVIN tr|G3X7X5|G3X7X5_BOVIN tr|L8IIB8|L8IIB8_9CETA	1	Leucine-rich repeat-containing protein 72 OS=Bos taurus GN=LRRC72 PE=2 SV=1;Leucine-rich repeat-containing protein 72 OS=Bos taurus GN=LRRC72 PE=4 SV=1;Leucine-rich repeat-containing protein ENSP00000371558-like protein OS=Bos mutus GN=M91_02491 PE=4 SV=1	28.5	11	0.004	5	0.18	0.06	0.18	0.05	1	0.24	0.04	0.28	0.05	DADVFELFLSQK+DTGPAQMLTITLR+KAHIVQSIAFR+LKYLWLHHNK+QKPAQRVPSDFAFANNVDK+RSAMAITSLNWDTVPTR+SAMAITSLNWDTVPTR
75	sp|A6H768|GALK1_BOVIN tr|G1K1R6|G1K1R6_BOVIN	1	Galactokinase OS=Bos taurus GN=GALK1 PE=2 SV=2;Galactokinase OS=Bos taurus GN=GALK1 PE=1 SV=2	30.1	11	0.003	4	0.15	0.02	0.28	0.02	0.535714	0.21	0.01	0.34	0.01	AFGRLMVESHHSLR+ARRAFLEEFGAEPELAVSAPGR+DLMSTEAFRRAR+ESLREVQLEELEAGR+EVQLEELEAGRDLMSTEAFRR+GDYRAFGRLMVESHHSLR+LAVLITNSNVR+QCEEVAR+QCEEVARALGKESLR+RAFLEEFGAEPELAVSAPGR+TAQAAAALR+TAQAAAALRR+VDGLVSLLTTSEDADEPRR
76	sp|A6H773|TMM70_BOVIN	1	Transmembrane protein 70, mitochondrial OS=Bos taurus GN=TMEM70 PE=2 SV=1	33.9	9	0.003	5	0.17	0.03	0.3	0.03	0.566667	0.17	0.02	0.34	0.03	CSHTQLDKSEDGR+GSSGRVGGTGLSAAAPVLR+GSSGRVGGTGLSAAAPVLRR+LIYTGNLARTVFGVK+LSGKRTALWASSALR+MLFLALGGPWAAGLRLSGK+SEDGRLIYTGNLAR+TALWASSALR+TALWASSALRDPRAAVSR
77	sp|A6H789|LRC3B_BOVIN tr|L8ISS7|L8ISS7_9CETA	1	Leucine-rich repeat-containing protein 3B OS=Bos taurus GN=LRRC3B PE=2 SV=1;Leucine-rich repeat-containing protein 3B OS=Bos mutus GN=M91_19050 PE=4 SV=1	18.9	6	0.002	5	0.19	0.02	0.3	0.02	0.633333	0.21	0.04	0.24	0.05	ARARIANNPWHCDCTLQQVLR+NAFNNLKAR+NAFNNLKARAR+NQEDARR+QKKADEPDDISTVV
78	sp|A6H7B5|CSN3_BOVIN tr|L8IPK6|L8IPK6_9CETA	1	COP9 signalosome complex subunit 3 OS=Bos taurus GN=COPS3 PE=2 SV=1;COP9 signalosome complex subunit 3 OS=Bos mutus GN=M91_06563 PE=4 SV=1	22.7	12	0.004	6	0.17	0.01	0.3	0.01	0.566667	0.2	0.02	0.31	0.02	CIELDER+DNNMGLVK+LTKTFLTLSLQDMASR+MASALEQFVNSVR+QLSAQGQMTQLCELINK+QPLRGIGVLR+TFLTLSLQDMASR+VQLSGPQEAEK+VQQLPKYTSQIVGR
79	sp|A6H7E1|SYMM_BOVIN tr|L8ILI2|L8ILI2_9CETA	1	Methionine--tRNA ligase, mitochondrial OS=Bos taurus GN=MARS2 PE=2 SV=1;Methionyl-tRNA synthetase, mitochondrial OS=Bos mutus GN=M91_09509 PE=4 SV=1	23.9	9	0.003	1	0.22	99.99	0.34	99.99	0.647059	0.04	99.99	0.4	99.99	EADISSTDFIRTTEARHR+EENYIFR+IAVQHFWGMLKSRGLLYK+LLDSELADALGGLLNR+LLSRLGVSSTER+QGVPSWDCDYYDEKVVK+SLGNVVDPR+VFGTLLQPVTPSLADR+VSAFRLLGR+VSLLEDFSFRYYSSGPLGVR+VVKLLDSELADALGGLLNR
80	sp|A6H7I8|TBC14_BOVIN tr|L8HZF4|L8HZF4_9CETA	1	TBC1 domain family member 14 OS=Bos taurus GN=TBC1D14 PE=2 SV=2;TBC1 domain family member 14 OS=Bos mutus GN=M91_18448 PE=4 SV=1	21.2	17	0.004	4	0.19	0.03	0.26	0.1	0.730769	0.14	0.11	0.23	0.06	AGRPSKPPSPKQNVR+AGRPSKPPSPKQNVRK+DCAGETEEGR+DCAGETEEGRKLR+DGEEFLFRTALGLLR+DLQRDCAGETEEGR+DLWWQGIPPSVR+DSREMEKGSPSLR+EASLELIKLDISR+ETRDLQRDCAGETEEGR+LRLLGPFSHFFTR+LYSPASQTLQR+NKKWAQVLTALQK+NSLARKQNAR+QQYEEMVVQAK+VRDLWWQGIPPSVR
81	sp|A6QLA0|NFX1_BOVIN tr|L8I6C1|L8I6C1_9CETA	1	Transcriptional repressor NF-X1 OS=Bos taurus GN=NFX1 PE=2 SV=1;Transcriptional repressor NF-X1 (Fragment) OS=Bos mutus GN=M91_04153 PE=4 SV=1	17.3	10	0.003	4	0.16	0.02	0.26	0.04	0.615385	0.22	0.03	0.33	0.05	CQRLCHKGECLGDEICK+DVLCGTDIGK+EHSPSESEKEIVGADPR+GKQNHMLK+ITDMQLGDSVEISK+KWARSPASQADGQSGWR+LDSNRIGR+LECDEECSALER+NPPKQEGQRHTNAGSR+NSGLYCGSQRRLDSNR+NVVVTAVR+QTDKNPGSSNLQK+RLDSNRIGR+SESGTNLR+SPASQADGQSGWRCPACQNVSAHVPNTYTCFCGK+TSVISCRCSFRTK+WARSPASQADGQSGWR
82	sp|A6QLE1|TDRD7_BOVIN	1	Tudor domain-containing protein 7 OS=Bos taurus GN=TDRD7 PE=2 SV=1	14.5	15	0.005	5	0.26	0.04	0.21	0.05	1.2381	0.14	0.05	0.3	0.05	ASLPPRFQMHLSR+DQVYAAKVENK+DQVYAAKVENKWHR+HMTSEYFVSLPFCGK+HVAVEKDQVYAAK+KLPFQAVTAQLAGVK+KPLVALVQTVIENTNPWDRK+KSLTDVLK+KTMPFFLEGKPKATLR+MLEADLVSKMLR+NFPDPHRSINR+QITNADLWKHQKDVFLSAISSGASSPNTK+TMPFFLEGKPK
83	sp|A6QLE5|NLRP3_BOVIN tr|L8ITQ2|L8ITQ2_9CETA	1	NACHT, LRR and PYD domains-containing protein 3 OS=Bos taurus GN=NLRP3 PE=2 SV=1;NACHT, LRR and PYD domains-containing protein 3 OS=Bos mutus GN=M91_04691 PE=4 SV=1	12.8	13	0.005	8	0.19	0.03	0.29	0.02	0.655172	0.18	0.03	0.3	0.02	DVKVLLENYGK+DVKVLLENYGKFEK+EHELLAIGRTWAK+GDILLSSLIRKR+IEIKLSTR+KIMLDWASEK+KIMLDWASEKLYQDR+KVERGDILLSSLIR+LLHNSPK+LQHLLGQAR+LVELDLSHNALGDFGIR+NHGLQKADVSAFLR+NTPQACSKLPNR+QQMDSGK+VERGDILLSSLIR
84	sp|A6QLI1|VGLU2_BOVIN tr|L8IVX1|L8IVX1_9CETA	1	Vesicular glutamate transporter 2 OS=Bos taurus GN=SLC17A6 PE=2 SV=1;Vesicular glutamate transporter 2 OS=Bos mutus GN=M91_06450 PE=4 SV=1	4.5	3	0.001	2	0.12	0.03	0.29	0.04	0.413793	0.19	0.01	0.4	0.02	HPTITDEER+NFAGKSLGQIYR+NFAGKSLGQIYRVLEK+SLGQIYRVLEKK
85	sp|A6QLJ3|GUF1_BOVIN tr|L8IPY6|L8IPY6_9CETA	1	Translation factor GUF1, mitochondrial OS=Bos taurus GN=GUF1 PE=2 SV=1;GTP-binding protein GUF1-like protein OS=Bos mutus GN=M91_13113 PE=3 SV=1	24.7	9	0.004	3	0.17	0	0.31	0.01	0.548387	0.23	0.02	0.29	0.02	EITIINPAQFPDKSK+EKIDMSCFPVENTR+GTAAESRAPDR+IDMSCFPVENTR+IMMLCQAR+ISAKLGTNVESVLDAVIKR+KGLLWPHLAPARGTAAESR+MWTLAGQGWWRGR+NADPERVEK+NADPERVEKQIEK+NMMYIDQNR+NVLAKCYGGDITRK+QVLDKLQVER+SAKPMVFAGMYPVDQSEYNNLKSAIEK
86	sp|A6QLT4|MTM1_BOVIN tr|L8IXA3|L8IXA3_9CETA	1	Myotubularin OS=Bos taurus GN=MTM1 PE=2 SV=2;Myotubularin (Fragment) OS=Bos mutus GN=M91_01342 PE=4 SV=1	23.1	20	0.004	3	0.13	0.05	0.36	0.03	0.361111	0.18	0.02	0.3	0.04	CSQPLVGMSGK+EINRVLYPVASMR+EINRVLYPVASMRHLELWVNYYIR+EVIYICPFNGPIKGRVYITNYR+FALKQEGHSR+GENSYGLDITCKDLR+IEKMGGATSRGENSYGLDITCK+LDELQLANSAK+NKEDERYLDVIR+NLRFALK+SPIFLQFIDCVWQMSK+TVIVRCSQPLVGMSGK
87	sp|A6QLU1|GPDM_BOVIN tr|L8HWH5|L8HWH5_9CETA	1	Glycerol-3-phosphate dehydrogenase, mitochondrial OS=Bos taurus GN=GPD2 PE=2 SV=1;Glycerol-3-phosphate dehydrogenase OS=Bos mutus GN=M91_19612 PE=3 SV=1	29.8	14	0.004	5	0.19	0.03	0.19	0.05	1	0.19	0.04	0.38	0.03	AFEVAKMASVTGK+AFEVAKMASVTGKR+CKDVLTGEEFDVR+CKDVLTGEEFDVRAK+DVLTGEEFDVR+GRVSGSRLAILMK+IVELMGR+KFLYYEMGYKSR+KQVNLAFVEAADCISEPVNR+LVSEFPYIEAEVK+LYDLVAGSNCLK+MNLAIALTAARYGAATANYMEVMSLLK+NGQVELNEFLQLMSAIQKGR+NTSEFDVLVIGGGATGSGCALDAVTRGLK+SEQLTDRSEISLLPSDIDR+TVGLFLQGGK+WPIVGVRLVSEFPYIEAEVK
88	sp|A6QLV3|SHOC2_BOVIN tr|L8ILV1|L8ILV1_9CETA	1	Leucine-rich repeat protein SHOC-2 OS=Bos taurus GN=SHOC2 PE=2 SV=1;Leucine-rich repeat protein SHOC-2 OS=Bos mutus GN=M91_12167 PE=4 SV=1	22.2	14	0.005	5	0.2	0.05	0.25	0.03	0.8	0.22	0.02	0.27	0.05	ASGGFGKESKEK+DIKNLSKLSMLSIR+EENSMRLDLSKR+KDSSAAQPGVAFSVDNTIK+LDSLTTLYLRFNR+LNSLTLAR+LPHGLGNLR+LPHGLGNLRK+LPHGLGNLRKLR+LSMLSIR+LSMLSIRENK+LVLTNNQLTTLPR+MSSSLGKEK+NLSKLSMLSIR+NLSKLSMLSIRENK+SSNAEVIKELNKCR
89	sp|A6QNM2|RRF2M_BOVIN tr|L8IAG0|L8IAG0_9CETA	1	Ribosome-releasing factor 2, mitochondrial OS=Bos taurus GN=GFM2 PE=2 SV=1;Ribosome-releasing factor 2, mitochondrial (Fragment) OS=Bos mutus GN=M91_13567 PE=3 SV=1	17.9	9	0.003	3	0.17	0.06	0.23	0.09	0.73913	0.15	0.01	0.39	0.02	AFKGVVDVVRTEK+EYGLETYLGPLQVAYREAILNSIR+ICFLNKMDK+IGASFNYAVESIR+ISSLHYFNNMCSSKIR+NIGIMAHIDAGK+QDNKVVIGYVPLAEIMGYSTVLR+QILEPLMNLEVTVSR+SLHSIINPPIAKIR
90	sp|A6QP57|TGM3_BOVIN tr|F1MIC8|F1MIC8_BOVIN	1	Protein-glutamine gamma-glutamyltransferase E OS=Bos taurus GN=TGM3 PE=2 SV=1;Protein-glutamine gamma-glutamyltransferase E OS=Bos taurus GN=TGM3 PE=4 SV=2	24.2	21	0.004	0	-9	-9	-9	-9	1	-9	-9	-9	-9	DCVLMVEGSGLLLGNLK+DIILDNPTLTLEVLDEAR+DPATDVAHR+DPATDVAHRNDPKYVGR+EEYVQEDAGIIFVGSTNR+FEILPTR+KLKPTMSFSATSASSLAR+LKPTMSFSATSASSLAR+NDPKYVGR+NNVLNISILSPANAPIGR+SGTKQLLANFSCNK+SRVRFEILPTR+VAGVLTVGKEVNLILMLK+VTFTASTGPYPSESANTK
91	sp|A6QP75|AL2CL_BOVIN tr|G3X7C3|G3X7C3_BOVIN tr|L8I930|L8I930_9CETA	1	ALS2 C-terminal-like protein OS=Bos taurus GN=ALS2CL PE=2 SV=1;ALS2 C-terminal-like protein OS=Bos taurus GN=ALS2CL PE=4 SV=1;Uncharacterized protein OS=Bos mutus GN=M91_11270 PE=4 SV=1	21.3	16	0.005	6	0.19	0.02	0.27	0.02	0.703704	0.25	0.06	0.24	0.03	CFLSATECLQK+DLTLTTNQRYSLVRDK+EALLGFHVQSSRELR+EGSMCGYGICEYSTSEVYK+EHKLPMDDLLPLLIYVVSR+INSLVFQPLLEAGPEASDPWGR+KALSNSLHPLGKLLR+LEEVFSATLAR+LEVLERTYGEIEATVSRVLGR+QVLSGLSSEGSVGTALLQALR+RQLGQGVFPVESR+SGYGVEEDSDR+TCPEDQAGR
92	sp|A6QP79|COL12_BOVIN tr|L8ID82|L8ID82_9CETA	1	Collectin-12 OS=Bos taurus GN=COLEC12 PE=2 SV=1;Collectin-12 (Fragment) OS=Bos mutus GN=M91_00552 PE=4 SV=1	17.3	18	0.006	9	0.19	0.02	0.3	0.03	0.633333	0.19	0.02	0.29	0.02	DAENRTAAKFSQLEER+DLQDVHRDAENR+DLQDVHRDAENRTAAK+GEPGVPGPR+GPPGPPGPSGAAVPLALK+GSKGLQGSK+GSKGLQGSKGSR+GSKGSKGLQGSK+LDTEVANLSVIMEEMKLVDSK+MDNVTGGMETSR+QTYDDKLTAVESDLK+SVDDTSQAIQR
93	sp|A6QPC8|EID3_BOVIN	1	EP300-interacting inhibitor of differentiation 3 OS=Bos taurus GN=EID3 PE=2 SV=1	21.1	3	0.002	1	0.3	99.99	0.07	99.99	4.28571	0.12	99.99	0.51	99.99	EVERILGLLQTYFR+KVQKMEENGVMPTK+LDLSGNQEATEKEVER+NIVAAFEISEAMITNSY+TREAALDSQFLVLASDLGK+TREAALDSQFLVLASDLGKEK+VQKMEENGVMPTKLR
94	sp|A6QPE7|ANR65_BOVIN	1	Ankyrin repeat domain-containing protein 65 OS=Bos taurus GN=ANKRD65 PE=2 SV=1	33.9	13	0.003	2	0.16	0.03	0.31	0.04	0.516129	0.19	0	0.33	0.01	DGVGATVLGVAAGLGR+DGVGATVLGVAAGLGRR+GGHIEVTGHLLDRGAEINAAGWLHK+LDSVLLVAAAAGR+LDSVLLVAAAAGRATALR+LLLQRGAQVGAADR+RQDMEVLLEHGADPSLTDR+TLMVGHLLAAPHPGPTAADAR+TPLHEAAWHGPSR+VAELLLRR
95	sp|A6QPU5|SYDM_BOVIN tr|F1MEQ5|F1MEQ5_BOVIN tr|L8IVA7|L8IVA7_9CETA	1	Aspartate--tRNA ligase, mitochondrial OS=Bos taurus GN=DARS2 PE=2 SV=1;Uncharacterized protein OS=Bos taurus GN=DARS2 PE=3 SV=1;Aspartyl-tRNA synthetase, mitochondrial OS=Bos mutus GN=M91_17759 PE=3 SV=1	18.3	14	0.004	7	0.17	0.01	0.33	0.02	0.515152	0.13	0.02	0.34	0.02	DFMKKTETLR+FYSLPQSPQQFK+FYSLPQSPQQFKQLLMVGGLDR+KACSLMGK+KDIESIR+LECADLLEAR+LMCLVTGAPSIR+LRLECADLLEAR+NPKMPTGEIEIK+QNIFLVLR+TPGGAKEFVIPSREPGK+VKTAKLLNSCK
96	sp|A6QQ24|PIGL_BOVIN tr|L8J4K3|L8J4K3_9CETA	1	N-acetylglucosaminyl-phosphatidylinositol de-N-acetylase OS=Bos taurus GN=PIGL PE=2 SV=1;N-acetylglucosaminyl-phosphatidylinositol de-N-acetylase OS=Bos mutus GN=M91_01718 PE=4 SV=1	24.1	7	0.002	2	0.16	0.11	0.24	0.16	0.666667	0.06	0.07	0.43	0.02	EAAQAQRAMSCHR+ELLQSCDVLGIPPSNVMIIENR+GCSVLTLQSVNLLR+GCSVLTLQSVNLLRK+KELLQSCDVLGIPPSNVMIIENR+TLQAEGKLPK
97	sp|A6QQ71|FKBP6_BOVIN tr|L8IPF9|L8IPF9_9CETA	1	Inactive peptidyl-prolyl cis-trans isomerase FKBP6 OS=Bos taurus GN=FKBP6 PE=2 SV=1;Peptidyl-prolyl cis-trans isomerase FKBP6 OS=Bos mutus GN=M91_01055 PE=4 SV=1	23.3	11	0.004	6	0.19	0.02	0.31	0.02	0.612903	0.17	0.02	0.31	0.02	EFGNYLFRQNR+EQPFNHDINNELK+LERPTMALR+LGEDITLWGMELGLLSMRR+LMKLGEDITLWGMELGLLSMR+MLDISGDRGVLK+RALLLLHRR
98	sp|A6QQ91|RASL3_BOVIN	1	RAS protein activator like-3 OS=Bos taurus GN=RASAL3 PE=2 SV=1	28	15	0.005	4	0.18	0.04	0.23	0.06	0.782609	0.23	0.09	0.26	0.06	AKSELGASASR+AQALVTDLGTAELARSGGR+ATGRAQALVTDLGTAELARSGGR+DGPPSALGSRESLATISELDLGAER+DLPKHTPLISK+DLPKHTPLISKSQSLR+DQALGTHRPVGK+DRSTNEGHRLK+EELAAAMVRVLRATGR+GSEALGPRLVCASLFLR+LEEEQPPR+LRGAGPGDAVLGR+LSLRLRGAGPGDAVLGR+LVLLGNEDEGPRQPR+QDLKMLSGLVESLSTHIRSLSEQQEQLR+SAAERDR+SGGREALLFR+SGGREALLFRENTLATK+TLTLIAKVIQNLANRAPFGEK+TQLQLLDSRLR+TQSVPAGRPAR+TTPRAGPGQLFWAERFHFEALPPAR
99	sp|A6QQJ3|PERI_BOVIN tr|L8IHY9|L8IHY9_9CETA	1	Peripherin OS=Bos taurus GN=PRPH PE=2 SV=1;Peripherin (Fragment) OS=Bos mutus GN=M91_03112 PE=3 SV=1	44.8	18	0.006	8	0.23	0.02	0.27	0.01	0.851852	0.24	0.03	0.21	0.04	ADQLCQQELRELR+DIRAQYESIAAK+DVDDATLSR+DVDDATLSRLELER+EEMARHLREYQELLNVK+ELRRELELLGR+FSSSRLLGSASPGSSVR+LDFSMAEALNQEFLATRSNEK+LEEELRQLKEEMAR+LGSFRGPR+LGSFRGPRAGTGALLR+LLGSASPGSSVR+LLGSASPGSSVRLGSFRGPR+MVLIRTIETR+NLQEAEEWYKSKYADLSDAANR+QELQELNDRFANFIEKVR+QEMNESRRQIQSLTCEVDGLR+QLKEEMAR+REDAEHNLVLFR+YADLSDAANR
100	sp|A6QQL9|SRP14_BOVIN	1	Signal recognition particle 14 kDa protein OS=Bos taurus GN=SRP14 PE=3 SV=1	64.5	16	0.004	2	0.11	0.03	0.25	0.07	0.44	0.35	0.02	0.28	0.03	CRLSGSVFITLKK+EVNKFQMAYSNLLR+EVNKFQMAYSNLLRANMDGLK+GSVEGFEPSDNK+GSVEGFEPSDNKCLLRATDGK+KGSVEGFEPSDNKCLLR+MVLLESEQFLTELTR
101	sp|A6QQP7|DYSF_BOVIN tr|F1MB01|F1MB01_BOVIN	1	Dysferlin OS=Bos taurus GN=DYSF PE=2 SV=1;Dysferlin OS=Bos taurus GN=DYSF PE=4 SV=2	15.7	34	0.009	12	0.19	0.02	0.26	0.02	0.730769	0.18	0.02	0.33	0.02	AFEGLSDFCNTFK+CDPYIKISIGKK+DHETMGRNR+DLSQMEALK+DLSQMEALKRHR+EDIESNLLRPIGVALRGAHFCLKVFR+EELYCPPIVVKVIDNRQFGR+IYPLPEDPAIPLPPR+KQPSHPPPYHPGGGR+LALVGNWGTTGLTYPK+LGHSELPAALEQAEDWLLR+LLSKFGAR+LPGGQWIYMSDNYTDVNGEK+LQTIFLKYPMEGVPR+LYRGKTQEETEDPSVIGEFK+NCGKLQTIFLK+NRFLGEANIPLR+QFGRRPVVGQCTIR+QIFGFDSNK+QIFGFDSNKK+QLPGVNIKPVVKVTAAGQTKR+QPSHPPPYHPGGGR+RPVVGQCTIR+SLRTDALIGEFRLDVGSIYR+TDALIGEFR+TMKFILWRR+TRHLS…
102	sp|A6QQR4|ERC6L_BOVIN	1	DNA excision repair protein ERCC-6-like OS=Bos taurus GN=ERCC6L PE=2 SV=1	24.2	23	0.007	9	0.15	0.02	0.29	0.03	0.517241	0.22	0.03	0.27	0.04	ACLSVDLSEEDDEPEEVVNVKIRR+DEGHQTLVFSQSR+DGRRGGILADDMGLGK+DIFPNEKVMSRIQK+DLSRIKLNDTIPQDGR+DLSVKEELDVIEDSHYIQQR+EAKEATKNGDLEQALK+EATKNGDLEQALKLFNLAK+EELDVIEDSHYIQQR+FVSLDHIKELLMETRSPLAELGVLK+GGILADDMGLGK+IKLNDTIPQDGR+ISENLMAIIKPYFLRR+KFVSLDHIKELLMETR+KLCDHPRLLSAR+KSSNPEVQLSEKSPDVGAICEMPSLSR+LFNLAKDIFPNEK+LITCGTVEEKIYR+LITCGTVEEKIYRR+LLSARACGLLNLGAAK+LVPLQEEIYR+NDISLPER+NDISLPERFFSPK+NDISLPERFFSPKISD…
103	sp|A6QQS3-2|SPERT_BOVIN sp|A6QQS3|SPERT_BOVIN tr|L8IHP8|L8IHP8_9CETA	1	Isoform 2 of Spermatid-associated protein OS=Bos taurus GN=SPERT;Spermatid-associated protein OS=Bos taurus GN=SPERT PE=2 SV=2;Spermatid-associated protein OS=Bos mutus GN=M91_03673 PE=4 SV=1	31.1	13	0.002	1	0.15	99.99	0.26	99.99	0.576923	0.54	99.99	0.04	99.99	ALREMVSTLSAQPGEEVGK+DNASSLEAMK+EMNQALQALREENQSLQVLR+ENKILQVFWEEHQAALGR+ETALQAHRGRENSTLQLLR+GGPGLPDGSQSLELLR+ILQVFWEEHQAALGR+LSRRVVSQHSYPLNR+VQLSDEMFVFQDGR
104	sp|A6QQV6|ANM7_BOVIN tr|F1MQX7|F1MQX7_BOVIN tr|L8IHQ2|L8IHQ2_9CETA	1	Protein arginine N-methyltransferase 7 OS=Bos taurus GN=PRMT7 PE=2 SV=1;Protein arginine N-methyltransferase 7 OS=Bos taurus GN=PRMT7 PE=4 SV=1;Protein arginine N-methyltransferase 7 OS=Bos mutus GN=M91_18238 PE=4 SV=1	9.9	10	0.002	0	-9	-9	-9	-9	1	-9	-9	-9	-9	IFKANHLEDK+MKVFCGR+NMKYYQGIRAAVSR+QPVPLQPIHAEGTIELR+QPVPLQPIHAEGTIELRR+SSYADMLHDKDR+SSYADMLHDKDRNMK+TSPEKNGR
105	sp|A6QQZ7|MPP7_BOVIN tr|L8IWY2|L8IWY2_9CETA	1	MAGUK p55 subfamily member 7 OS=Bos taurus GN=MPP7 PE=2 SV=1;MAGUK p55 subfamily member 7 (Fragment) OS=Bos mutus GN=M91_00321 PE=4 SV=1	20.7	10	0.003	4	0.14	0.03	0.38	0.05	0.368421	0.17	0.02	0.29	0.04	AIPCKEAGLSFKK+DEQTGAIVVAR+KDEQTGAIVVARIMR+KGDILQIMSQDDATWWQAK+KSSGFRR+LALRRPEILVQPLKVSSR+NNYYGTSIDSVR+NNYYGTSIDSVRSVLAKNK+RLALRRPEILVQPLK+SAQIMESQYGHLFDK+SGLIHVGDELR
106	sp|A6QR40|ELMO3_BOVIN	1	Engulfment and cell motility protein 3 OS=Bos taurus GN=ELMO3 PE=2 SV=1	28.1	13	0.004	3	0.12	0.03	0.31	0.07	0.387097	0.15	0.03	0.39	0.01	DCPHVREKGSGK+EALRHLLLLAPDLTFAR+EKLKPELMGLIR+EMRATQEDFDKVMQVVR+EQIQALR+EQLQALRQAAFEPEGESVGAGLSADRR+LGTIIEDGDDLGEVLALALR+LKPELMGLIR+MRTPLDPYSQEQR+NGSILCLSTAPDR+NGSILCLSTAPDREAERLLR+QAAFEPEGESVGAGLSADR+QAAFEPEGESVGAGLSADRR+QAPSAYSRFVLENSSR+TKVNALTYGEVLR+VPPGLLALDNMLYFSR
107	sp|A6QR55|UBP4_BOVIN tr|L8HR56|L8HR56_9CETA	1	Ubiquitin carboxyl-terminal hydrolase 4 OS=Bos taurus GN=USP4 PE=2 SV=1;Ubiquitin carboxyl-terminal hydrolase 4 OS=Bos mutus GN=M91_16972 PE=4 SV=1	13.9	15	0.005	9	0.18	0.02	0.31	0.01	0.580645	0.18	0.01	0.32	0.02	ADTIATIEKEMR+DAHVAPRMFK+DAHVAPRMFKTQVGR+DANGRPDAVVAK+DANGRPDAVVAKEAWENHRLR+DEYEAEINR+EAWENHRLR+HVSMLQPQKKK+KFDLWSLPK+LDTVVEFPVR+LSGIAAENMVVTDVYNHR+NEDGTWPR+QMWSGRDAHVAPR+TTLQRGAQWYLIDSR
108	sp|A7E2Z2-2|EZH1_BOVIN sp|A7E2Z2|EZH1_BOVIN tr|L8IFI9|L8IFI9_9CETA	1	Isoform 2 of Histone-lysine N-methyltransferase EZH1 OS=Bos taurus GN=EZH1;Histone-lysine N-methyltransferase EZH1 OS=Bos taurus GN=EZH1 PE=2 SV=2;Histone-lysine N-methyltransferase EZH1 (Fragment) OS=Bos mutus GN=M91_17126 PE=4 SV=1	16.5	15	0.005	5	0.18	0.04	0.26	0.05	0.692308	0.23	0.04	0.24	0.06	ESLILKLPTDELMNPSQKK+EYAMLHNPRSKCSGR+LQANMGAKALYVANFAK+NCSIQRGLK+NCSIQRGLKK+QCPCYLAVR+QDDSKEDLPVTR+RHAIEGSK+VYDKYMSSFLFNLNNDFVVDATR+YMSSFLFNLNNDFVVDATRKGNK
109	sp|A7E300|RHG07_BOVIN tr|F1MIZ8|F1MIZ8_BOVIN tr|L8IWU6|L8IWU6_9CETA	1	Rho GTPase-activating protein 7 OS=Bos taurus GN=DLC1 PE=2 SV=1;Rho GTPase-activating protein 7 OS=Bos taurus GN=DLC1 PE=4 SV=2;Rho GTPase-activating protein 7 (Fragment) OS=Bos mutus GN=M91_08852 PE=4 SV=1	21.9	20	0.005	8	0.2	0.03	0.24	0.04	0.833333	0.18	0.04	0.31	0.03	AAIMLLPDENR+ALSNGSFSPSGNNSSVNWR+DAIEALCR+DLPEPLMTNK+DQRLQAIK+DSGVGASLTR+DSGVGASLTRSNR+GSHHSKHKAPSK+IKVPDYKDR+NSSSSVSSR+NSYTEQELKPLTLEALGR+QDPIPGSPDAVHLK+QIHLDVDNDR+QMNESTIDCVNYEGQSAYDVADMLKQYFR+RDSGVGASLTR+SAPSHENMQTDLSDR+SGVKSRIQALR+TGSFHGPGHISLR+TGSFHGPGHISLRR+THSLLKR+TRSLSACNKR+TWRTNLPK
110	sp|A7E371|PRCA1_BOVIN tr|L8J2J2|L8J2J2_9CETA	1	Protein PROCA1 OS=Bos taurus GN=PROCA1 PE=2 SV=2;Protein PROCA1 OS=Bos mutus GN=M91_14633 PE=4 SV=1	19.9	7	0.002	2	0.12	0	0.28	0.13	0.428571	0.18	0.04	0.37	0.09	EEETDEKEK+EEPSSEDIVESSSPRKR+QDLESEDSYNDPGR+SLSPRELARMSESSPDSR+TEDDTSSWDESSTDINR
111	sp|A7E3C4|F187A_BOVIN tr|L8I5N6|L8I5N6_9CETA	1	Ig-like V-type domain-containing protein FAM187A OS=Bos taurus GN=FAM187A PE=2 SV=2;Ig-like V-type domain-containing protein FAM187A (Fragment) OS=Bos mutus GN=M91_16928 PE=4 SV=1	12.8	11	0.004	7	0.16	0.01	0.31	0.03	0.516129	0.2	0.02	0.31	0.02	AKASDHNPELLVR+ASDHNPELLVR+IAGFRLGVTSPGR+KVQEGVMAIFNYVSK+VGSDMLVRFSIR
112	sp|A7MB12|UTP15_BOVIN tr|L8IWL0|L8IWL0_9CETA	1	U3 small nucleolar RNA-associated protein 15 homolog OS=Bos taurus GN=UTP15 PE=2 SV=1;U3 small nucleolar RNA-associated protein 15-like protein OS=Bos mutus GN=M91_09407 PE=4 SV=1	28.1	8	0.003	2	0.16	0.01	0.42	0.03	0.380952	0.15	0	0.27	0.02	DEKEISRVLNFLIR+DTAYCATFRQDGR+ELLETLGMMDMLFATMTR+LLSGSLDRK+LLVAGSEDGGVQLFDISGR+LNTDLFVTGSYDHTVK+NFRISKALDR+QDGRLLVAGSEDGGVQLFDISGR+QDGRLLVAGSEDGGVQLFDISGRAPLR+QQDDILINRPSKKHLELYDR+SEAKKDSVPR+TVTCLCLSSSGQR
113	sp|A7MB46|PCD18_BOVIN tr|F1MJ04|F1MJ04_BOVIN tr|L8IQT5|L8IQT5_9CETA	1	Protocadherin-18 OS=Bos taurus GN=PCDH18 PE=2 SV=1;Protocadherin-18 OS=Bos taurus GN=PCDH18 PE=4 SV=2;Protocadherin-18 (Fragment) OS=Bos mutus GN=M91_12341 PE=4 SV=1	15.8	14	0.004	6	0.14	0.01	0.33	0.02	0.424242	0.14	0.02	0.38	0.02	AMQRGNTPLLVVNEDNGEISIGAKIDR+DSGRGDSEAGDSDYDLGR+ELKSSYELQLTASDMGVPQRSGSSILK+GAESGFHVTR+LLGEGFSDLFLTDGR+LSEDVADVLVK+NLKYRIYEEQR+NNTAEISIPKGAESGFHVTRIR+VAESTYQHHPKRPSR+VLGHSDQCWMPPLPSPSSDYR+YALQDMDKFSLK
114	sp|A7MB64|IPRI_BOVIN tr|L8I302|L8I302_9CETA	1	Inositol 1,4,5-trisphosphate receptor-interacting protein OS=Bos taurus GN=ITPRIP PE=2 SV=1;Inositol 1,4,5-triphosphate receptor-interacting protein OS=Bos mutus GN=M91_18612 PE=4 SV=1	22.7	15	0.004	3	0.23	0.01	0.3	0	0.766667	0.2	0.01	0.27	0.01	AADPLCAPNSPYLDTMR+ASSTDWLLSFAVYER+EALERVAEEGQQQNESR+KVPQAMGLPEAVRR+LQLEQLRLEEEMAR+NNVVHHGSK+QGYGQIKVVR+RAEPLNLFRPFVLQRSLYR+VVRADEDTLGCICGK
115	sp|A7MB70|SEM3C_BOVIN tr|L8IVA1|L8IVA1_9CETA	1	Semaphorin-3C OS=Bos taurus GN=SEMA3C PE=2 SV=1;Semaphorin-3C (Fragment) OS=Bos mutus GN=M91_06784 PE=4 SV=1	8.2	7	0.002	4	0.22	0.04	0.28	0.04	0.785714	0.21	0.03	0.27	0.02	DIMGAFSHSEMQMINQYCK+IIATSQGLLIR+LNERIIATSQGLLIR+NHAPITTMK+NHAPITTMKISSKK+QQHQQGEESQK
116	sp|A7MB73|GT253_BOVIN tr|F1MWR5|F1MWR5_BOVIN tr|L8HT99|L8HT99_9CETA	1	Probable inactive glycosyltransferase 25 family member 3 OS=Bos taurus GN=CERCAM PE=2 SV=1;Probable inactive glycosyltransferase 25 family member 3 (Fragment) OS=Bos taurus GN=CERCAM PE=4 SV=2;Glycosyltransferase 25 family member 3 (Fragment) OS=Bos mutus GN=M91_12716 PE=4 SV=1	10.4	4	0.002	2	0.23	0.01	0.32	0.01	0.71875	0.27	0	0.19	0.01	GPRLDLAGGSGHSLRPHPR+KLLASQPLRR+LPWDLIYLGR+MLNSSVMR+VVDAVDGRMLNSSVMR
117	sp|A7MB80|GTF2I_BOVIN tr|L8IQ62|L8IQ62_9CETA	1	General transcription factor II-I OS=Bos taurus GN=GTF2I PE=2 SV=1;General transcription factor II-I OS=Bos mutus GN=M91_01077 PE=4 SV=1	18.5	22	0.006	6	0.16	0.03	0.35	0.01	0.457143	0.1	0.03	0.35	0.02	AAEMHKMKSTAQANR+ESTSSSKSPPR+ETDGNSQIK+GSNKIKFVVK+IKFIIKKPEMFETAIK+ILLAKERIR+KFGEAIGMGFPVKVPYR+MVVTFLMSALESMCKELAKSK+QKVENLFNEKCGEALGLK+RPSTYGIPRLERILLAK+SKAEVACIAVYETDVFVVGTERGR+TEPSEDSGISLEMAAVTVK+VKTEPSEDSGISLEMAAVTVK
118	sp|A7MBF6|CA228_BOVIN	1	Uncharacterized protein C1orf228 homolog OS=Bos taurus PE=2 SV=1	26.7	9	0.003	3	0.18	0.02	0.25	0.03	0.72	0.19	0.03	0.36	0.05	GLVALLIPSFKETSK+KESIKLLQVIANSGR+LLQVIANSGR+LLRSIGVFLSAVSSNR+LLSFLQDWDNAGKVAR+LTYMTGSPLDK+MTSIKEQAAISR+SIGVFLSAVSSNR+TAPELEQEFSQGASLFLVRLTTWLR+TMGEELYK
119	sp|A7MBI0|PACN1_BOVIN	1	Protein kinase C and casein kinase substrate in neurons protein 1 OS=Bos taurus GN=PACSIN1 PE=2 SV=1	39.6	14	0.004	6	0.19	0.02	0.34	0.03	0.558824	0.15	0.04	0.29	0.02	EAEDGFRKAQKPWAK+ELEQAIRGADAQDDLR+GPQYGSLERAWGAIMTEADKVSELHQEMK+IDDGHRLCNDLMSCVQERAK+KAEGAALTNAAGVVESTSQAGDR+LCNDLMSCVQER+LDSGQLGLYPANYVEVV+NSLLNEDLEK+NSLLNEDLEKVK+QLLEKGPQYGSLER+QPKKAEGAALTNAAGVVESTSQAGDR+RHLNLAESSSYVQVYR+TEQSVTPEQQKKLQDK+TVKRIDDGHR
120	sp|A7MBJ2|SENP7_BOVIN tr|L8IVL7|L8IVL7_9CETA	1	Sentrin-specific protease 7 OS=Bos taurus GN=SENP7 PE=2 SV=1;Sentrin-specific protease 7 (Fragment) OS=Bos mutus GN=M91_03013 PE=4 SV=1	9.6	11	0.003	4	0.12	0.03	0.27	0.02	0.444444	0.22	0.03	0.35	0.05	DDTNSVSR+EFSKTNMVDLCPK+ENNLTEDNPNLSMAQRR+ENNLTEDNPNLSMAQRRHK+ISPERQLKVMLTNVLWTDLGR+KENNLTEDNPNLSMAQR+MCKRPCILILDSLK+MEPTLISR+NKDDTNSVSR+NKDDTNSVSRMEPTLISR+TNMVDLCPK+VILTNVLGTKLGR+VMLTNVLWTDLGR
121	sp|A7MBJ4|PTPRF_BOVIN	1	Receptor-type tyrosine-protein phosphatase F OS=Bos taurus GN=PTPRF PE=2 SV=1	17.9	26	0.005	0	-9	-9	-9	-9	1	-9	-9	-9	-9	DEAIYECTATNSLGEINTSAK+DFLPVDPAASNGR+DFLPVDPAASNGRIKQLR+DGQSRTIR+DSLLAHSSDPVEMRR+EDEMPVGRNVLELSNVVR+EFKVTDARDGQSR+ELPGELLGYR+FISANLPCNK+GAGPLSPSIQSRTMPVEQVFAK+GAGPLSPSIQSRTMPVEQVFAKNFR+GSSAGGLQHLVSIR+ILYNGQSVEVDGHSMR+LIADLQPNTEYSFVLMNR+LVNIMPYELTR+NFRVEAAMK+NFRVEAAMKTSVLLSWEVPDSYK+NRLVNIMPYELTRVCLQPIR+NVLELSNVVR+SGSSEKRELR+TATVVMMTR+TFALYKSGSSEKR+TGCFIVIDAMLER+TGEGFIDFIGQVHK+TGEQAPSSPPR+TGEQAPSSPP…
122	sp|A7MBJ5|CAND1_BOVIN tr|L8J2U2|L8J2U2_9CETA	1	Cullin-associated NEDD8-dissociated protein 1 OS=Bos taurus GN=CAND1 PE=2 SV=1;Cullin-associated NEDD8-dissociated protein 1 OS=Bos mutus GN=M91_05979 PE=4 SV=1	22.4	20	0.005	8	0.18	0.02	0.34	0.03	0.529412	0.2	0.02	0.25	0.03	AADIDQEVK+CVAALTRACPKEGPAVVGQFIQDVK+DISSIGLKTVIGELPPASSGSALAANVCK+DSIKLDDDSER+EVEMGPFKHTVDDGLDIR+IDLRPVLGEGVPILASFLR+ISGSILNELIGLVR+KAAFECMYTLLDSCLDR+LDDDSERKVVK+LSTLCPSAVLQR+LTLIDPETLLPRLK+MILKLLEDKNGEVQNLAVK+MLTFLMLVR+NDSMSTTR+NEITRLTTVK+NQRALKLGTLSALDILIK+QDELKRSAMR+TYIQCIAAISR+VIRPLDQPSSFDATPYIK
123	sp|A7YSY2|SPA5L_BOVIN tr|L8IWI3|L8IWI3_9CETA	1	Spermatogenesis-associated protein 5-like protein 1 OS=Bos taurus GN=SPATA5L1 PE=2 SV=1;Spermatogenesis-associated protein 5-like protein 1 OS=Bos mutus GN=M91_07887 PE=3 SV=1	16	27	0.005	8	0.18	0.01	0.31	0.02	0.580645	0.17	0.02	0.32	0.02	ELLRLPLR+EVVIGTPTLRQR+EVVVVGSTNRPDALDPALR+GGPHQAPESR+GSKSDQHGKCK+LDKIIYIPPPDEKGR+LLPVDTR+RPGRFDREVVIGTPTLR+TQLVRAVAR+TVKPSLSHK+VVAQVLTLLDGIGEDR
124	sp|A7YVD7|NDUF6_BOVIN	1	NADH dehydrogenase (ubiquinone) complex I, assembly factor 6 OS=Bos taurus GN=NDUFAF6 PE=2 SV=1	30.3	9	0.003	3	0.12	0.02	0.37	0.03	0.324324	0.15	0.06	0.32	0.04	ARRLSEPVASGR+DLHADHAASHIGK+DSVSEKTIGLMR+DSVSEKTIGLMRMQFWK+KTVDDIYSDNPPHQPVAIELWK+MAASTLGSAWGPLR+NTLLPLSLYIQSWR+RLSEPVASGR+RPPRGLWARAR+TIGLMRMQFWKK
125	sp|A7YW98|SYRC_BOVIN tr|L8I316|L8I316_9CETA	1	Arginine--tRNA ligase, cytoplasmic OS=Bos taurus GN=RARS PE=2 SV=1;Arginyl-tRNA synthetase, cytoplasmic OS=Bos mutus GN=M91_17050 PE=3 SV=1	39.8	17	0.005	4	0.18	0.05	0.26	0.02	0.692308	0.22	0.01	0.31	0.03	AAQTSVAYGCIK+AAQTSVAYGCIKYADLSHNR+DRQSGEVLKVNMWR+EENLKLKYR+EFEDRGFVQVDDGR+ERDKVLTTEELK+GNTAAYLLYAFTRIR+GNTAAYLLYAFTRIRSIAR+IPSIGENK+LFEFAGYNVLR+LNDYIFSFDKMLDDR+NPDIIKAWKLICDVSR+NYSCSEASADLEKLREENLK+QEFNKIYEALDISLIER+QEFNKIYEALDISLIERGESFYQDR+QSGEVLKVNMWR+QSGEVLKVNMWRMLLCEAVAAVMAK+RFDTEEEFKK+SIARLANIDEEMLR+TRSGETVRLIDLLEEGLK+VEIAGPGFINIHLR+VIVDFSSPNIAKEMHVGHLR
126	sp|A7YWC4|ATAD3_BOVIN	1	ATPase family AAA domain-containing protein 3 OS=Bos taurus GN=ATAD3 PE=2 SV=1	26.8	26	0.005	7	0.19	0.02	0.27	0.02	0.703704	0.17	0.02	0.35	0.03	DGVTAMHKVFDWASTSRR+DKWSNFDPTGLER+EALSLAQMQEQTLQLEHQAK+EERERLVR+KLALHSGMDYAIMTGGDVAPMGR+LALHSGMDYAIMTGGDVAPMGR+LAQFDYGKK+MQWLKAEGSQPPTLR+NATSVAGRYIEAR+NEMLRVEAEAR+NVLMYGPPGTGK+RATVEREMELR+SLYRNVLMYGPPGTGK
127	sp|A7YWH3|KCD19_BOVIN	1	BTB/POZ domain-containing protein KCTD19 OS=Bos taurus GN=KCTD19 PE=2 SV=1	27	25	0.006	5	0.12	0.03	0.38	0.04	0.315789	0.16	0.03	0.3	0.03	AITAKVVSLVNQLWTLHISPK+CHCFLTDIILDSIR+DITYEPMKVALK+DITYEPMKVALKTHLEPR+DKGPEPNFNPYFPMK+DPGPQAGAGAGTK+EASALTSSENQRLFIDRDGSTFR+EGKHHLRVRPADIPVAER+ESENEEAFPIR+FIVNFLRSQK+HILNFLR+HWGGHPESPPKKK+LYITGNGVLFQHVKNWLGTCR+LYRMNMGGCSR+MEEPGMPHESAEDLFHFNVGGWHFSVPRSK+NWLGTCR+TMWNKAKGTLAR+TSCPPPSPGKGGR
128	sp|A7YY57|RHG29_BOVIN	1	Rho GTPase-activating protein 29 OS=Bos taurus GN=ARHGAP29 PE=2 SV=1	26.2	26	0.005	7	0.17	0.04	0.3	0.05	0.566667	0.19	0.04	0.26	0.04	DQPDVPTACQRPR+EFIDLAVEIQHVNEEQEMK+EPDGIPFVLKMCASEIENR+GRLLVDQELESASR+HQNLNSVDLQNAAEMLIAK+KFSHMLLYLK+LCKNPVFEGVNR+LCKNPVFEGVNRK+LDELLRVLK+LLCMQRQDEYEK+LPDSSNKMEEDR+LYDPGQEYSEFVRATNSAEEEK+MEEDRCSNSADITGPSFLR+MLETETALK+NGRNMGNVNSDK+NIVKLAEATR+NPVFEGVNR+NTNSVELALSYAK+QEQNKMLETETALK+QEQNKMLETETALKK+RMQQFEDLEDEIPQFV+SSMFRAEEEHLSSSSGLVKNLNR+TGMIVPSAFQERGVALNIR+TLMSKAALTHK+TLMSKAALTHKFR+TPSSGTMSSADDLDER+…
129	sp|A7YY75|SEH1_BOVIN tr|L8ITL0|L8ITL0_9CETA	1	Nucleoporin SEH1 OS=Bos taurus GN=SEH1L PE=2 SV=1;Nucleoporin SEH1 (Fragment) OS=Bos mutus GN=M91_15563 PE=4 SV=1	27.8	8	0.004	6	0.14	0.04	0.22	0.03	0.636364	0.19	0.04	0.38	0.05	DLIHDVSFDFHGR+FAPKHMGLMLATCSADGIVR+HMGLMLATCSADGIVR+RTTLVDSRTSVTDVK+TTLVDSRTSVTDVK+VQIFEYNENTRKYAK+VSWNITGTVLASSGDDGCVR+VWDKSESGEWHCTASWK
130	sp|A7Z052|WDR6_BOVIN	1	WD repeat-containing protein 6 OS=Bos taurus GN=WDR6 PE=2 SV=1	23.7	12	0.004	5	0.17	0.04	0.34	0.04	0.5	0.13	0.01	0.32	0.04	AIFVKER+ATSELILLPVTGLECVGER+AVAVWGVGTPGGPQDPQPGLTAHVVSAGGR+GGQLQPVLR+GGQLQPVLRQKPCRGMNWVAGVR+GHQGRGIRALAAHER+GLLATASEDR+GMNWVAGVR+GSVLLYPSRPDLLK+ILSRSLMVSASIDQR+ISWGQGR+IWKVGDLRVPGGR+LACHVMHLSSHR+MIKVDPETR+SGLWNMSDWIWDAR+SHEKLHIINCGGGHRSWAFSDTEAAMAFAYLK+SHSRPGVLKAVTLAGSWR+YMSLAVCELDRPGLGPLVAAACSDGAVR
131	sp|A7Z056|UBP20_BOVIN	1	Ubiquitin carboxyl-terminal hydrolase 20 OS=Bos taurus GN=USP20 PE=2 SV=1	13	16	0.003	3	0.17	0.05	0.32	0.04	0.53125	0.14	0.01	0.35	0.03	DNEPPGPIDNSRIAQVK+ERQQVVSLAAMREPSLLR+HNLTVNLTTFR+KSSEEAVRER+LVSEVWHRKRPSYVVPTSLSHGIK+SGGGSQAEAELLMADEAGR+SVISDIFDGSVLSLVQCLTCDR
132	sp|A7Z063|WASH1_BOVIN	1	WAS protein family homolog 1 OS=Bos taurus GN=WASH1 PE=1 SV=1	20.4	8	0.003	3	0.16	0.02	0.31	0.02	0.516129	0.18	0.01	0.35	0.05	EVVDPSSGRATLLESIRQAGGIGK+GPGSGASEGPGGAFAR+IEKIKGSK+IQSKHRPLDER+KAIKVFSSAK+LFDAPLSISR+VSGDIFSR+VSGDIFSRISQRVELSR
133	sp|A8E657|AASS_BOVIN tr|L8IP57|L8IP57_9CETA	1	Alpha-aminoadipic semialdehyde synthase, mitochondrial OS=Bos taurus GN=AASS PE=2 SV=1;Alpha-aminoadipic semialdehyde synthase, mitochondrial OS=Bos mutus GN=M91_03184 PE=4 SV=1	23.7	17	0.004	7	0.26	0.03	0.25	0.03	1.04	0.21	0.05	0.21	0.03	AQEANMGLLDEILKQEIR+DAVIASNGMLSNK+DAVIASNGMLSNKYKYIQK+DMIVMRDSFGIR+EHAQSLSMGTKK+GLHHKAVMALRR+KVLVLGSGYVSEPVLEYLLR+LIDYEKMVDHRGIR+LMPKKTYAFFSHTIK+LRENREHAQSLSMGTK+LSYGPGEKDMIVMRDSFGIR+MLLDGEIQAKGLMGPFSK+NSGQAVQAVR+QDAQSLLAPGKSPVAGVEGCPALPHK+QEIRLIDYEK+TVGLPTAMAAK+YAEIYGIPSAHTLLRGTLR
137	sp|E1B7Q7|TRIPC_BOVIN tr|L8J5P9|L8J5P9_9CETA	1	E3 ubiquitin-protein ligase TRIP12 OS=Bos taurus GN=TRIP12 PE=2 SV=2;Putative E3 ubiquitin-protein ligase TRIP12 OS=Bos mutus GN=M91_11025 PE=4 SV=1	23.4	70	0.017	23	0.19	0.01	0.27	0.02	0.703704	0.23	0.01	0.28	0.01	ANTSEKQKTGQVPK+DAVSREIRLK+DCVGGKRGR+DDDKVDNQAK+DDSLDLSPQGR+DIPVTIHNLEEYLR+DNSRGVKR+DQNKARR+DTISNNR+EDEESNKDCVGGKR+EDPELAKSFIK+EKLLMAAR+EQSKTGGSSKFDWAAR+GGKDIPVTIHNLEEYLR+GSGLGKRGAAEAR+GSRRPKYSPPR+HLAESESLLTSPPK+IDPLALVQAIERYLVVR+IDPLALVQAIERYLVVRGYGR+IIEQINEDTGTAR+IVVGALQMAEILMQK+KGGKDIPVTIHNLEEYLR+KRSESPPAELPSLR+LEQDKSQTK+LLMAAREGQQSFHLS+LPDYSSLEIMR+LQALLEAR+LQALLEARGLPPHLFGPLGPR+LSAQSNSNNIEPAR+…
138	sp|E1BC52|CH037_BOVIN tr|L8IJ15|L8IJ15_9CETA	1	Protein C8orf37 homolog OS=Bos taurus PE=1 SV=1;Uncharacterized protein OS=Bos mutus GN=M91_13755 PE=4 SV=1	23.7	13	0.004	6	0.17	0.01	0.29	0.02	0.586207	0.18	0.01	0.35	0.02	GGGGGFFGHDQNR+GGGGGFFGHDQNRAEAK+LKSKSSGNTSVR+NNMPEFHK+NNMPEFHKLKTK+SKSSGNTSVR+SSGNTSVRASIQGLGK
139	sp|E1BGQ2|ZCHC4_BOVIN tr|L8IGM4|L8IGM4_9CETA	1	Zinc finger CCHC domain-containing protein 4 OS=Bos taurus GN=ZCCHC4 PE=3 SV=1;Zinc finger CCHC domain-containing protein 4 OS=Bos mutus GN=M91_04082 PE=4 SV=1	9.9	5	0.002	3	0.21	0.01	0.32	0.04	0.65625	0.15	0.06	0.29	0.01	GQSMNHTSATR+LGTLEAEGSSGR+LSGARLAAR+MATSRDRLGTLEAEGSSGR+RSACPNISTSKK
140	sp|E1BH29|ALKB5_BOVIN	1	RNA demethylase ALKBH5 OS=Bos taurus GN=ALKBH5 PE=3 SV=1	23.9	11	0.004	6	0.18	0.01	0.34	0.04	0.529412	0.19	0.03	0.27	0.03	AVIILRKTR+DNYKAGSR+DPALKPKRSHR+EKLKSMTSR+KADPDAAHRPR+LFSQDECAKIEAR+LKSMTSR+QKEEEARK+RAGRFSSENYR+TRLDAPR+VKSGIRQMR
141	sp|E1BK52|STK10_BOVIN tr|H2XJF0|H2XJF0_BOVIN	1	Serine/threonine-protein kinase 10 OS=Bos taurus GN=STK10 PE=3 SV=3;Serine/threonine-protein kinase 10 OS=Bos taurus GN=STK10 PE=4 SV=1	23.1	34	0.004	8	0.15	0.02	0.32	0.02	0.46875	0.15	0.03	0.34	0.03	AGNVLMTLEGDIR+ALEEDLNQKKR+DLKAGNVLMTLEGDIR+DYAKFQEQLK+EDLELAMKR+ELRLLQKEEHR+ELVAEAKAEVMEEIEDGR+ERECLTRK+EVKNEVEKLPR+EYEHVRRDLDPNEVWEIVGELGDGAFGK+FQEQLKLMKK+IISEDEKKDEEMR+KEVKNEVEK+KSLHINGGGSAAEQR+LADFGVSAK+LHNKTLKR+LSTFEKRK+NEVEKLPR+NLKTLQK+NQTQLSSKHELQLEQMHK+NQTQLSSKHELQLEQMHKR+QAADQGGDLSPAASR+QAADQGGDLSPAASRSQK
142	sp|E1BKA3|AJUBA_BOVIN tr|L8IKD2|L8IKD2_9CETA	1	LIM domain-containing protein ajuba OS=Bos taurus GN=AJUBA PE=3 SV=1;Protein ajuba OS=Bos mutus GN=M91_15382 PE=4 SV=1	17.7	9	0.002	4	0.2	0.03	0.24	0.04	0.833333	0.18	0.03	0.35	0.04	HSYPPALGSPGALAGAGVGATGPLER+ILQAMGKSYHPGCFR+IREPESREDYFGTCIK+KGESSRSGSDGTPGPGK+LSGLGGPRKSGPR+NPRGSFEVPR+SGSDGTPGPGK
143	sp|E1BLP6|ARI5B_BOVIN tr|G5E585|G5E585_BOVIN tr|L8IJJ9|L8IJJ9_9CETA	1	AT-rich interactive domain-containing protein 5B OS=Bos taurus GN=ARID5B PE=3 SV=1;AT-rich interactive domain-containing protein 5B OS=Bos taurus GN=ARID5B PE=4 SV=1;AT-rich interactive domain-containing protein 5B (Fragment) OS=Bos mutus GN=M91_14421 PE=4 SV=1	29.5	15	0.004	5	0.21	0.02	0.24	0.03	0.875	0.22	0.02	0.32	0.01	ARAVSPLDPAKEVSGK+AVSPLDPAK+CGLQAGSVKTESLGR+CTPKDPICIAELQLLWEER+DPNNNSDGKSVAK+EKASEQESEGSKAAHSGHSGGTSEGHK+EKENAPKPQDASEVSSEQEK+ERKTPIER+LGGYETITAR+LPAMADYIANCTVKVDQLGSDDIHNALK+NNHNNCKKVSNEEKPK+QENNSQENENKTKVSGAK+QSTLNSGLNFKDVLKEK+QWKHIYDELGGNPGSTSAATCTR+RIKHEISK+RSLEDLDLVIAGK+SITEPLPIADTK+SLEDLDLVIAGKK+TKVSGAKR+VAEEAGEKGPAPPLASAPLAPTPGTGKQSLTSPSALVDSK+VAIGEECR+VAIGEECRADEQAFLVALYK+VSPMTMSAPK
144	sp|E1BLT8|ZDHC5_BOVIN tr|L8IWA0|L8IWA0_9CETA	1	Palmitoyltransferase ZDHHC5 OS=Bos taurus GN=ZDHHC5 PE=3 SV=1;Palmitoyltransferase OS=Bos mutus GN=M91_06063 PE=3 SV=1	25	14	0.004	7	0.21	0.02	0.31	0.03	0.677419	0.11	0.03	0.31	0.05	GIQVRMKWCATCR+GRGLASPEPGLPAPYLGR+IMDNGIQGELR+QPSYRSEPSLEPESFR+RSPLGKTPLARPVAPR+TPLARPVAPR+TSSSSDDSKRSPLGK+TVEIKGIQVR+YRPGYSSSSASAAMPHSSSAKLSRGDSLK+YTGLRTHLSLATNEESSLLGKDSPPTPTMYK
145	sp|E1BP36-2|MMS19_BOVIN sp|E1BP36|MMS19_BOVIN tr|K7DXW6|K7DXW6_BOVIN tr|L8IA98|L8IA98_9CETA	1	Isoform 2 of MMS19 nucleotide excision repair protein homolog OS=Bos taurus GN=MMS19;MMS19 nucleotide excision repair protein homolog OS=Bos taurus GN=MMS19 PE=2 SV=3;MMS19 nucleotide excision repair protein homolog (Fragment) OS=Bos taurus GN=MMS19 PE=4 SV=1;MMS19 nucleotide excision repair protein-like protein (Fragment) OS=Bos mutus GN=M91_14349 PE=4 SV=1	11.4	13	0.005	9	0.18	0.01	0.31	0.02	0.580645	0.2	0.02	0.3	0.02	DFLPSLWASIR+DHHLVIPSVLQGLR+EDLILSLRAVLASTPR+ELKDFLPSLWASIR+LLQAAAGASAR+TILEMILGFLK+VEAEGLAALNSLTACLSR
146	sp|E1BP74|MARF1_BOVIN tr|L8HXR7|L8HXR7_9CETA	1	Meiosis arrest female protein 1 OS=Bos taurus GN=MARF1 PE=3 SV=2;Limkain-b1 OS=Bos mutus GN=M91_01453 PE=4 SV=1	15.5	38	0.01	15	0.19	0.01	0.29	0.02	0.655172	0.22	0.01	0.29	0.01	ALKRMENEDVFGNR+APGLAESVYKTNPK+DGKSISNR+DGKSISNRLR+DNCLMMTDLLK+DVPSPLHAGSK+DYMENKKVAVELK+GSLYCEDCLSKPARNSIIDAAK+GSQANSGSATR+GSQANSGSATRNANVK+ILEVPESPPASELR+IREKFFK+IVVLKNDMK+LAANFSFAPITK+LCHVVKVADMESGK+LHFQSCR+LNVSDLYKLTDTVAIR+LSDNCGGK+LSDNCGGKVLNITGCSAILR+LTDTVAIR+NAADDKLR+NQASEALLHHANELIR+NSIIDAAK+QFSKDVVDLLR+SKSPVGNPQLIQFSR+SSELCETK+TKQFSKDVVDLLR
147	sp|E1BPH3|TDRD5_BOVIN tr|G5E528|G5E528_BOVIN	1	Tudor domain-containing protein 5 OS=Bos taurus GN=TDRD5 PE=3 SV=1;Tudor domain-containing protein 5 OS=Bos taurus GN=TDRD5 PE=4 SV=1	11.1	34	0.007	20	0.18	0.01	0.29	0.01	0.62069	0.21	0.01	0.31	0.01	ASVCSGPSSRRR+DSSELLEDMMIEMR+ENVPSKGFR+GRASVCSGPSSR+IQECLRKEIR+KSVSEEK+MSEQERIQECLRK+NHKEPEQK+NSLSTAVIK+NSMQKGR+NSRSNVMETSR+QILGMER+SVSEEKQRGWPAAK
148	sp|E1BPW0|ENTP5_BOVIN tr|G5E5P3|G5E5P3_BOVIN tr|L8IRF0|L8IRF0_9CETA	1	Ectonucleoside triphosphate diphosphohydrolase 5 OS=Bos taurus GN=ENTPD5 PE=3 SV=1;Ectonucleoside triphosphate diphosphohydrolase 5 OS=Bos taurus GN=ENTPD5 PE=3 SV=1;Ectonucleoside triphosphate diphosphohydrolase 5 OS=Bos mutus GN=M91_00647 PE=3 SV=1	17.1	7	0.003	6	0.18	0.04	0.34	0.04	0.529412	0.17	0.04	0.2	0.05	AEALLFEVK+EVGFEPCYAEVLRVVQGK+GSFYAFSYYYDR+LYTHSYLGFGLKAAR+TLEQTPR+TPVVLKATAGLR
150	sp|F1MBP6|KLHL3_BOVIN tr|J9JH85|J9JH85_BOVIN tr|L8ISF8|L8ISF8_9CETA	1	Kelch-like protein 3 OS=Bos taurus GN=KLHL3 PE=3 SV=3;Kelch-like protein 3 (Fragment) OS=Bos taurus GN=KLHL3 PE=4 SV=1;Kelch-like protein 3 (Fragment) OS=Bos mutus GN=M91_11396 PE=4 SV=1	21.7	8	0.003	4	0.19	0.06	0.24	0.08	0.791667	0.2	0.06	0.28	0.04	AFKVMNELR+AGVVFMAGHVYAVGGFNGSLR+AGVVFMAGHVYAVGGFNGSLRVR+DFLIEAMKYHLLPLDQRLLIK+DQWTSIASMQER+NNNTCKDFLIEAMK+QVADMNMCRR+TITVNPAHMGKAFKVMNELR+TPVSLPKVMIVVGGQAPK+TPVSLPKVMIVVGGQAPKAIR+WTLLPTNMSTGR
151	sp|F1MJM0|ZN326_BOVIN tr|L8HSB8|L8HSB8_9CETA	1	DBIRD complex subunit ZNF326 OS=Bos taurus GN=ZNF326 PE=2 SV=1;Zinc finger protein 326 (Fragment) OS=Bos mutus GN=M91_16254 PE=4 SV=1	31.4	20	0.007	8	0.17	0.01	0.3	0.01	0.566667	0.18	0.01	0.34	0.02	DLYRSGYGFNEPEQSRFGGSYGGR+DQQIEGDEEEEEK+DVMEGVTADDHMMK+DYGPGSYGGMDR+ENYSSYSSFSSPHMKPAPVGSR+FGPYESYDSRSSLGGR+IIEKDVMEGVTADDHMMK+LRPGFMEDR+LRPGFMEDRGR+NEEEEKRR+NQGGSSWEAPYSR+NQGGSSWEAPYSRSK+NSEKYGDGYR+NSLDSFGGR+NYDAFGGPSTGR+NYDAFGGPSTGRGR+NYDAFGGPSTGRGRGR+SGYGFNEPEQSR+SKLRPGFMEDRGR+SSLGGRDLYR
152	sp|F1MJR8|TEX14_BOVIN tr|L8I8U4|L8I8U4_9CETA	1	Inactive serine/threonine-protein kinase TEX14 OS=Bos taurus GN=TEX14 PE=3 SV=2;Testis-expressed protein 14 OS=Bos mutus GN=M91_18584 PE=4 SV=1	14.7	27	0.006	6	0.15	0.01	0.35	0.04	0.428571	0.17	0.01	0.31	0.03	DCLESIPFQDTK+DFIGAQR+EKAKSLDSLLTSSEVLPAR+ELKETGSQFHSPRGHSSPTGK+EQAERRSLWASSR+GEESTKPEKR+IDSPQRLISGVPR+ISMQSVSSEIYNAKSR+LEMIQKEQAER+LHDEKGR+LISGVPRFGGLMQGNPNGSPNRPPK+LPAFTGAGSSSIAK+NDLKDFIGAQR+NLGKNSEILTKSQFQPIR+NSEILTKSQFQPIR+QDAASPACSVAEEAR+QKDRTMNLQDIR+SGLQVKQKDR+TEVKEMAAK+TMNLQDIR
153	sp|F1MLB4|DAAF3_BOVIN tr|L8I6W8|L8I6W8_9CETA	1	Dynein assembly factor 3, axonemal OS=Bos taurus GN=DNAAF3 PE=3 SV=2;Uncharacterized protein (Fragment) OS=Bos mutus GN=M91_04011 PE=4 SV=1	6.2	4	0.001	2	0.22	0.01	0.28	0	0.785714	0.25	0	0.26	0	LAHLVPEPDR+VGELAQAAGFAPQLGGKPSDTFAR
154	sp|F1MRK3|AMOL2_BOVIN tr|K7DXW2|K7DXW2_BOVIN tr|L8HWR5|L8HWR5_9CETA	1	Angiomotin-like protein 2 OS=Bos taurus GN=AMOTL2 PE=2 SV=3;Angiomotin-like protein 2 (Fragment) OS=Bos taurus GN=AMOTL2 PE=4 SV=1;Angiomotin-like protein 2 OS=Bos mutus GN=M91_11921 PE=4 SV=1	24.7	20	0.006	7	0.2	0.03	0.26	0.03	0.769231	0.2	0.03	0.3	0.02	AGRIEKLESEIQR+DPRGPPGGSRR+EALEKTMR+ELESTAEKAGR+ENARLQRDNER+GSPHFQHAEVR+HGHVRSLSER+LASKTQEAQAGSQDMVAK+LQRELESTAEK+LRTRLEQELK+NKMDSEMRR+NQQGPPAR+QAGTPGGGGGSGGTPELSALR+RAELLEQALSNAQGR+RLASKTQEAQAGSQDMVAK+RLQDFNRDLR+TASLDSIATSR+TQEAQAGSQDMVAK+VQDFSDMVEILI
155	sp|F1MRW8|RN169_BOVIN tr|J9JH84|J9JH84_BOVIN tr|L8I4A0|L8I4A0_9CETA	1	E3 ubiquitin-protein ligase RNF169 OS=Bos taurus GN=RNF169 PE=3 SV=3;E3 ubiquitin-protein ligase RNF169 (Fragment) OS=Bos taurus GN=RNF169 PE=4 SV=1;RING finger protein 169 (Fragment) OS=Bos mutus GN=M91_10000 PE=4 SV=1	24.5	17	0.005	5	0.14	0.03	0.32	0.04	0.4375	0.2	0.03	0.3	0.03	ATAMTPTSNPIIGVLLSTR+EKPLLALNTR+GSVDQYLLR+LPDGRVLSPLIIKSTPR+LRQSSGEVGLAPTDPVLR+LSDSENEEPSR+NSVLGGVLK+NSVLGGVLKTKK+QSSGEVGLAPTDPVLR+RLPFSSLSALASLHKPER+SGSSPDAKLDKTR+TRITASMK
156	sp|F1MT22|LGR5_BOVIN tr|L8IKH1|L8IKH1_9CETA	1	Leucine-rich repeat-containing G-protein coupled receptor 5 OS=Bos taurus GN=LGR5 PE=3 SV=2;Leucine-rich repeat-containing G-protein coupled receptor 5 OS=Bos mutus GN=M91_11637 PE=4 SV=1	17.4	18	0.004	5	0.16	0.04	0.35	0.05	0.457143	0.13	0.03	0.31	0.02	DLEDFLLDFEEDLR+GAFAGLYSLKVLMLQNNHLR+GCPAHCQCEPDGR+GDNSTAEDLHK+HTSLMSINSDDVEK+IAIIDPNAFSTLPSLR+ISSVPPSCFSGLHSLR+LAGNALTYIPK+LDANRISSVPPSCFSGLHSLR+LQKIDLR+LYCHLEKGDLESMWDCSMVK+QVPTEALQNLR
157	sp|F1N152|HTRA1_BOVIN tr|L8IUW7|L8IUW7_9CETA	1	Serine protease HTRA1 OS=Bos taurus GN=HTRA1 PE=2 SV=1;Serine protease HTRA1 (Fragment) OS=Bos mutus GN=M91_16347 PE=4 SV=1	20.4	11	0.003	2	0.16	0.02	0.36	0.04	0.444444	0.13	0.01	0.35	0.01	ELKDRHR+ESTLNMVVR+ESTLNMVVRR+GGKELGLR+IAPAVVHIELFR+IDHQGKLPVLLLGR+KESTLNMVVRR+VKVELKNGATYEAK
158	sp|F1N2W9|MCM9_BOVIN tr|L8IAC2|L8IAC2_9CETA	1	DNA helicase MCM9 OS=Bos taurus GN=MCM9 PE=3 SV=2;DNA replication licensing factor MCM9 (Fragment) OS=Bos mutus GN=M91_20133 PE=3 SV=1	17.7	18	0.004	5	0.21	0.02	0.27	0.03	0.777778	0.25	0.02	0.25	0.02	DRPEEKRER+DVGHFLSVTGTVIR+ERAPAKGTVQPELELGNDMGR+FDLILVLLDTK+GTVQPELELGNDMGR+KAATVSEAAVSADEPDSVLTHHVPR+LAEAHARLMFR+LAVAMVLAGGIQR+LHKARAQELCR+LWSMEKMK+NAARTTIR+NDILLILK+NPSEGGPSCVATATALGR+NTAPVSPSPKTSR+SGDDITIYGVVMQR+TKDVGHFLSVTGTVIR+TSRGAMALKICNNR+TTIRLLESLIR
159	sp|F1N3B8|OAS2_BOVIN	1	2'-5'-oligoadenylate synthase 2 OS=Bos taurus GN=OAS2 PE=2 SV=1	21.3	9	0.003	4	0.19	0.04	0.27	0.09	0.703704	0.23	0.05	0.23	0.03	DFEVKFEISK+EATEWLSSLCFKDK+GGSYGRRTVLR+GSGAQDFDMAEGFR+KALKIICSFLEENCFR+MELQNTNR+NFVRSLPLK+RSLDMVKARPGEFSVCFTELQEK+SGCPIQPWNVPKKR+TRPVILDPADPTGDVGGGHR+YALELLSIYAWEK
160	sp|F1N4M2|MRFL_BOVIN tr|L8I8G7|L8I8G7_9CETA	1	Myelin regulatory factor-like protein OS=Bos taurus GN=MYRFL PE=2 SV=1;Myelin regulatory factor (Fragment) OS=Bos mutus GN=M91_18923 PE=4 SV=1	12	27	0.005	6	0.18	0.02	0.31	0.02	0.580645	0.21	0.01	0.28	0.02	ALSASSPKRTISK+DQIFMENVGAVK+IEELEIWNR+IFMENVGAVK+IFNPIKINLLADQVTKVTLGR+INLLADQVTKVTLGR+LHFSETTANNMR+LSSSKSSASEASSISK+NSKVSFSGK+QNVQEVDTNEQLR+QNVQEVDTNEQLRR+VTLGRLHFSETTANNMR
161	sp|F1N5V1|UBP37_BOVIN tr|L8IZH4|L8IZH4_9CETA	1	Ubiquitin carboxyl-terminal hydrolase 37 OS=Bos taurus GN=USP37 PE=3 SV=1;Ubiquitin carboxyl-terminal hydrolase 37 OS=Bos mutus GN=M91_13929 PE=4 SV=1	30.2	30	0.011	22	0.16	0.01	0.3	0.01	0.533333	0.18	0.01	0.35	0.01	CGGKCALVR+DCDENKENK+DRSGYIFFYMHK+DYSPGSTNLDR+EDDDLKR+EEQELQQALAQSLQEQEAWEQK+EIFDELLETEKNSQALNLEVGK+EQFNDLSIDLPR+FSGYMQNDAHEFLSQCLDQLKEDMEKLNK+GSIKAAAGNGVTPAR+IRSMQTGITK+IRSMQTGITKWK+LNAAMKPSQGSGSFGAILGSR+NAETGNLPHSYR+NAISATAER+NSQALNLEVGKTTR+NVVLRPSGAK+QGIPWKKIPLNALIR+SCRIEPDK+SGLLENRTEKR+SGYIFFYMHK+SLGFLPQPAPLSVKKLR+TNISSQTPSAK+VLGNPSRGSIK+YSFNVALSLNNK
162	sp|G3MWR8|MICA3_BOVIN	1	Protein-methionine sulfoxide oxidase MICAL3 OS=Bos taurus GN=MICAL3 PE=3 SV=1	22.7	38	0.011	11	0.15	0.01	0.3	0.02	0.5	0.21	0.02	0.31	0.02	ASPVSRAELRTR+DASDLNAEER+DLDGAGKR+DLSSSSGLGLQGSSSRTR+ELAAERMR+ELAAERMRAR+ELGISPIMTGR+ELGISPIMTGREMASVGEPDK+EMDIAAAAPR+EMDIAAAAPRTPR+EPRTYTEEELNAK+FVQATTCKGTLK+GEAGMGKKDDPK+KSDGRSCPSTPSSGTTVDAGKPR+KTSQSEEEDTPR+LAIAITANFINR+LMQEWFKLVQEKNAMVR+LSAYAYALEDGK+LSGPAQRKRPAGVPLSGK+LVQEKNAMVR+MEESKNEATNR+NAMVRYESELMIFAR+NFSQYSIDPVTR+NTLEGFRRK+QLQLILLK+QLSCSEDSDLSSDDVLERTSQK+RDAFSRNNVLHLWPFTIHDLR+RLHRAQIIQR+S…
163	sp|G5E5X0|LIMD1_BOVIN	1	LIM domain-containing protein 1 OS=Bos taurus GN=LIMD1 PE=3 SV=1	13.1	5	0.002	2	0.1	0.08	0.38	0.09	0.263158	0.16	0.01	0.33	0	GSRQGSQDCGSK+IYCVRDYHKVLAPK+LEALTQR+LEREMDAHPK+LPCQTLIPGPELGPTAAELK+MAKIHLQQQQQQQLLQEETLPR+MAKIHLQQQQQQQLLQEETLPRASR+QGSQDCGSK
165	sp|O02740|GUC2F_BOVIN tr|F1MRI0|F1MRI0_BOVIN tr|L8HYU1|L8HYU1_9CETA	1	Retinal guanylyl cyclase 2 OS=Bos taurus GN=GUCY2F PE=2 SV=1;Guanylate cyclase OS=Bos taurus GN=GUCY2F PE=3 SV=2;Guanylate cyclase OS=Bos mutus GN=M91_09145 PE=3 SV=1	22.6	10	0.004	4	0.13	0.04	0.31	0.05	0.419355	0.14	0.04	0.35	0.05	ENGWASAASLVQHSR+EWELHSTYTVDMETELLR+EWELHSTYTVDMETELLRFGETPIHFPGGRPPR+GKKTNIIDSMLR+GSHASVSFQITSEVQSGR+LKSRNCVVDGR+MESTGLPYR+MRHMPEVPVRIR+NCVVDGR+NGMRHAAEIANMSLDILSSVGTFKMR+NSHPTFSRTLPSPIR+QCWAEAAEQRPTFDEIFNQFKTFNKGK+RGSHASVSFQITSEVQSGRSPR+SVESSASDIFEMMKDLR+TEKLLTQMLPPSVAESLK+TLGEGYEVELRGR+TLPSPIRVLLTVMK+TNIIDSMLR+TNIIDSMLRMLEQYSSNLEDLIQER
166	sp|O02776|PARG_BOVIN tr|F1MG95|F1MG95_BOVIN	1	Poly(ADP-ribose) glycohydrolase OS=Bos taurus GN=PARG PE=1 SV=1;Poly(ADP-ribose) glycohydrolase OS=Bos taurus GN=PARG PE=4 SV=1	21.7	20	0.005	7	0.19	0.04	0.3	0.04	0.633333	0.18	0.04	0.25	0.04	AGMNDVNAKRPGSTSSLNVECR+CGIRLPPLRPSANHTVTIR+DIYSMHTFLTER+EADTELR+EESMMSSVQK+GGEIRLHFQFEGGESR+GSATSLVFKQK+HVKMPCSEQNLYPVEDENGER+ITDHFMR+KDSKITDHFMR+KRPGSTSS+LENVSQLGFDK+LFEGRSSRKPEK+LHFQFEGGESR+LPPLRPSANHTVTIR+LTVGEVYK+MPCSEQNLYPVEDENGER+MPRCGIRLPPLRPSANHTVTIR+NSKQHGR+RPGSTSSLNVECRNSKQHGR+RSSAKGGEIR+TITSWMDTKGIKTVESESLHSK+WDAAATSPPAASDAR
168	sp|O18728|FSCN2_BOVIN	1	Fascin-2 OS=Bos taurus GN=FSCN2 PE=2 SV=1	17.5	20	0.007	15	0.14	0.02	0.32	0.02	0.4375	0.16	0.02	0.34	0.02	AEDFLFEFRERGR+GSNQLDTNR+LAIRARSGK+MPTNGLHQVLK+QMWVLEPDPGEGTAVLFRSSHLGR+SGKYLRGGASGLLR+VNASAPSLK
169	sp|O46382|BIG1_BOVIN tr|E1BP90|E1BP90_BOVIN tr|L8IP69|L8IP69_9CETA	1	Brefeldin A-inhibited guanine nucleotide-exchange protein 1 OS=Bos taurus GN=ARFGEF1 PE=1 SV=1;Brefeldin A-inhibited guanine nucleotide-exchange protein 1 OS=Bos taurus GN=ARFGEF1 PE=4 SV=2;Brefeldin A-inhibited guanine nucleotide-exchange protein 1 OS=Bos mutus GN=M91_16530 PE=4 SV=1	20.2	22	0.006	3	0.2	0.03	0.27	0.03	0.740741	0.18	0.03	0.33	0.04	ACEVALEEIKAETEKQSPPHGEAK+AGSSTLPPVK+DAYVQALAR+DFLRPFEHIMKRNR+DFVSALR+DFVSALRMFLEGFRLPGEAQK+DLPEEYLSAIYNEIAGK+EDAENLAAAQRDAVDFDVR+EGSLTGAKDQAPDEFVGLGLVGGNVDWK+EQYIKMNR+FKAHASFYYPLLCEIMQFDLIPELRAVLR+GREGSLTGAK+GSQELGMSNVQELSLR+GSQELGMSNVQELSLRKK+IFTGSTRLDGNAIVDFVR+LDSTQVGEFLGDNDK+LLYNLEMEQMAK+LLYNLEMEQMAKTAK+LMEKFAAR+LSVSSNDTQESGNSSGPSPGAK+LVNDLSKIAQGR+MFSLQKIVEISYYNMGR+NMFLTRALEK+NRSPTIRDMVVR+QETS…
170	sp|O46411|5NTC_BOVIN tr|B1H0W4|B1H0W4_BOVIN tr|L8J2V6|L8J2V6_9CETA	1	Cytosolic purine 5'-nucleotidase OS=Bos taurus GN=NT5C2 PE=1 SV=1;5'-nucleotidase, cytosolic II OS=Bos taurus GN=NT5C2 PE=2 SV=1;Cytosolic purine 5'-nucleotidase OS=Bos mutus GN=M91_06637 PE=4 SV=1	23.4	15	0.004	4	0.16	0.04	0.26	0.06	0.615385	0.22	0.07	0.28	0.05	DGDLFMSYRSMFQDVR+EAYHRVFVNRSLAMEK+EQYPNKFIQRDDTER+EVGKVFLATNSDYK+KVTHDMDMCYGMMGSLFR+LPLLLSR+LQNAADMPANMDK+NRTSVDFK+QVDTKTGKLK+SGSRQTLFASQVMR+VTHDMDMCYGMMGSLFR+VTHDMDMCYGMMGSLFRSGSR
177	sp|O77588|PLOD1_BOVIN tr|G8JKV7|G8JKV7_BOVIN	1	Procollagen-lysine,2-oxoglutarate 5-dioxygenase 1 OS=Bos taurus GN=PLOD1 PE=2 SV=2;Procollagen-lysine,2-oxoglutarate 5-dioxygenase 1 OS=Bos taurus GN=PLOD1 PE=4 SV=1	16.5	14	0.005	9	0.18	0.02	0.23	0.03	0.782609	0.2	0.04	0.34	0.03	APRKGWTLMHPGR+EKYIHENYTKALAGK+EQINITLDHRCR+GTRYIAVSFVDP+GWTLMHPGR+LDPDMAFCANIR+LDPDMAFCANIRQQDVFMFLTNR+LHYPQKRLR+LTHYHEGLPTTK+NMGADLCRQDR+NVIAPLMTRHGR+QQDVFMFLTNR+REQINITLDHRCR
178	sp|O77628|FOS_BOVIN tr|L8I833|L8I833_9CETA	1	Proto-oncogene c-Fos OS=Bos taurus GN=FOS PE=2 SV=2;Proto-oncogene c-Fos OS=Bos mutus GN=M91_20353 PE=4 SV=1	15.8	9	0.003	4	0.18	0.01	0.3	0.02	0.6	0.15	0.01	0.37	0.01	AGVMKTMTGGR+AGVMKTMTGGRAQSIGR+GSSSNEPSSDSLSSPTLLAL+LEFILAAHRPACK+NKMAAAKCR+TMTGGRAQSIGRR
179	sp|O77834|PRDX6_BOVIN tr|L8IXN6|L8IXN6_9CETA	1	Peroxiredoxin-6 OS=Bos taurus GN=PRDX6 PE=1 SV=3;Peroxiredoxin-6 OS=Bos mutus GN=M91_17764 PE=4 SV=1	52.2	16	0.005	3	0.18	0	0.27	0.01	0.666667	0.24	0.04	0.3	0.04	DEKGMPVTAR+DFTPVCTTELGRAAK+DINAYNGEEPTEKLPFPIIDDKNR+GVFTKELPSGK+KLKLSILYPATTGR+LFPKGVFTKELPSGK+MPGGLLLGDEAPNFEANTTIGR+NGDSVMVLPTIPEEEAK
183	sp|O97790|TBCD1_BOVIN	1	TBC1 domain family member 1 OS=Bos taurus GN=TBC1D1 PE=2 SV=2	22.7	33	0.007	3	0.15	0.04	0.32	0.05	0.46875	0.17	0.04	0.33	0.06	ADDQTKVPEIISSIR+ANTLSHVPVECQEPPQLVR+ELWQKAILQQILLLR+ENELIISFLR+EPGTKPVRLCVSPSGLR+IQSLEATVEK+KFEVLFCGR+LCERIEGMNSSK+LCVSPSGLR+LDYEEITPCLK+LEKTNSSLRK+LLHDYHR+LQASENDLLNKR+MHSAVGQGVPRHHR+QAFTVAAVQQTAK+QAFTVAAVQQTAKAPAQLCEGCPLQGLHK+QATLALELER+QLTSQQHAILIDLGR+QQPKDTPYKELLK+QTSQIAAENIGSELPSSATRFR+SLAFRKEFQDAGLR
184	sp|P00727-2|AMPL_BOVIN sp|P00727|AMPL_BOVIN tr|G3N0I4|G3N0I4_BOVIN tr|L8J1N1|L8J1N1_9CETA	1	Isoform 2 of Cytosol aminopeptidase OS=Bos taurus GN=LAP3;Cytosol aminopeptidase OS=Bos taurus GN=LAP3 PE=1 SV=3;Cytosol aminopeptidase OS=Bos taurus GN=LAP3 PE=1 SV=1;Cytosol aminopeptidase OS=Bos mutus GN=M91_14809 PE=3 SV=1	36.3	52	0.015	15	0.17	0.02	0.31	0.03	0.548387	0.18	0.02	0.29	0.02	AAANMDLMRADMGGAATICSAIVSAAK+ADMGGAATICSAIVSAAK+EILNISGPPLK+EILNISGPPLKAGKTR+FAEIVEENLK+GSPNASEPPLVFVGKGITFDSGGISIK+KVVVSAKLHGSEDQEAWQR+LILADALCYAHTFNPK+LREILNISGPPLKAGK+LVSGKLREILNISGPPLK+MPLFEHYTR+MPLFEHYTRQVIDCQLADVNNIGK+QVIDCQLADVNNIGK+RLMETPANEMTPTK+TDVFIRPK+WAHLDIAGVMTNK
185	sp|P00743|FA10_BOVIN tr|Q3MHW2|Q3MHW2_BOVIN	1	Coagulation factor X OS=Bos taurus GN=F10 PE=1 SV=1;F10 protein (Fragment) OS=Bos taurus GN=F10 PE=2 SV=1	20.5	7	0.002	2	0.2	0.05	0.3	0.02	0.666667	0.15	0.03	0.33	0.03	DGIGDYTCTCAEGFEGKNCEFSTR+EVFEDAEQTDEFWSK+FVKETYDFDIAVLR+IMKARAGAAGSR+LSSTLKMLEVPYVDR+NCEFSTR+TEPSAGEDGSQVVRIVGGR
186	sp|P02548|NFL_BOVIN tr|L8I3G3|L8I3G3_9CETA	1	Neurofilament light polypeptide OS=Bos taurus GN=NEFL PE=1 SV=3;Neurofilament light polypeptide OS=Bos mutus GN=M91_04128 PE=3 SV=1	45.8	16	0.005	4	0.17	0.05	0.33	0.03	0.515152	0.23	0.03	0.17	0.08	AEEAKDEPPSEGEAEEEEKEK+DEPPSEGEAEEEEKEK+DIRAQYEKLAAK+EDAEGRLMEAR+EDAEGRLMEARK+FTVLTESAAKNTDAVR+GADEAALARAELEK+IDSLMDEIAFLKK+KGADEAALAR+KGADEAALARAELEK+LENELRTTKSEMAR+LLKAKTLEIEACR+LSFTSVGSLTTGYTQSSQVFGR+NLQARYEEEVLSREDAEGR+NTDAVRAAK+QKHSEPSR+QLQELEDKQNADISAMQDTINKLENELR+QNADISAMQDTINKLENELR+RSYSSSSGSLMPSLESLDLSQVAAISNDLK+SAYGGLQTSSYLMSAR+SAYSSYSAPVSSSLSVRR+TLEIEACRGMNEALEK
187	sp|P02698|GBG1_BOVIN tr|L8HQH7|L8HQH7_9CETA	1	Guanine nucleotide-binding protein G(T) subunit gamma-T1 OS=Bos taurus GN=GNGT1 PE=1 SV=2;Guanine nucleotide-binding protein subunit gamma OS=Bos mutus GN=M91_14199 PE=3 SV=1	90.5	7	0.003	3	0.22	0.04	0.2	0.04	1.1	0.26	0.02	0.3	0.03	EVTLERMLVSKCCEEFR+LKMEVDQLK+MPVINIEDLTEKDK+NPFKELKGGCVIS+SGEDPLVK+SGEDPLVKGIPEDK
188	sp|P04272|ANXA2_BOVIN tr|L8I1U1|L8I1U1_9CETA	1	Annexin A2 OS=Bos taurus GN=ANXA2 PE=1 SV=2;Annexin (Fragment) OS=Bos mutus GN=M91_19103 PE=3 SV=1	33.3	52	0.02	30	0.17	0.01	0.3	0.01	0.566667	0.21	0.01	0.28	0.01	AEDGSVIDYELIDQDAR+DIVSDTSGDFR+DLYDAGVK+GLGTDEDSLIEIICSRTNQELQEINR+KGTDVPKWISIMTER+KLMVALAKGR+LMVALAKGRR+QDIAFAYQR+RAEDGSVIDYELIDQDAR+TKGVDEVTIVNILTNR+TNQELQEINR
190	sp|P05128|KPCG_BOVIN tr|F1MU35|F1MU35_BOVIN tr|L8J5G7|L8J5G7_9CETA	1	Protein kinase C gamma type (Fragment) OS=Bos taurus GN=PRKCG PE=2 SV=1;Protein kinase C OS=Bos taurus GN=PRKCG PE=3 SV=1;Protein kinase C OS=Bos mutus GN=M91_02874 PE=3 SV=1	16.6	20	0.004	3	0.16	0.02	0.28	0.02	0.571429	0.22	0.01	0.34	0.03	APTSDEIHVTVGEAR+GSDELYAIKILK+GSFGKVMLAER+GSFGKVMLAERR+ITDFGMCKENVFPGSTTR+NDFMGAMSFGVSELLK+NLIPMDPNGLSDPYVK+NLTKQKTR+QKTRTVK+RLGSGPDGEPTIR
192	sp|P07353|IFNG_BOVIN sp|Q866Y6|IFNG_BOSIN tr|A9QXB7|A9QXB7_BOVIN tr|L8HQQ5|L8HQQ5_9CETA	1	Interferon gamma OS=Bos taurus GN=IFNG PE=1 SV=1;Interferon gamma OS=Bos indicus GN=IFNG PE=2 SV=1;Interferon gamma OS=Bos taurus PE=2 SV=1;Interferon gamma OS=Bos mutus GN=M91_15471 PE=3 SV=1	17.5	7	0.002	3	0.18	0.02	0.33	0.01	0.545455	0.18	0.01	0.31	0.02	AINELIKVMNDLSPKSNLR+GGPLFSEILK+VMNDLSPKSNLR
193	sp|P08057|TNNI3_BOVIN tr|L8I4K0|L8I4K0_9CETA	1	Troponin I, cardiac muscle OS=Bos taurus GN=TNNI3 PE=1 SV=2;Troponin I, cardiac muscle (Fragment) OS=Bos mutus GN=M91_04010 PE=4 SV=1	23.1	7	0.003	3	0.2	0.08	0.22	0.06	0.909091	0.17	0.05	0.34	0.03	ISADAMMQALLGAR+ISADAMMQALLGARAKETLDLR+RRSSANYR+SGGSTAGDTVPAPPPVR+VRISADAMMQALLGAR+VRISADAMMQALLGARAK
194	sp|P08760|KAD3_BOVIN tr|L8IVR0|L8IVR0_9CETA	1	GTP:AMP phosphotransferase AK3, mitochondrial OS=Bos taurus GN=AK3 PE=1 SV=3;GTP:AMP phosphotransferase AK3, mitochondrial OS=Bos mutus GN=AK3 PE=3 SV=1	48.5	32	0.006	4	0.15	0.01	0.31	0.03	0.483871	0.19	0.04	0.33	0.03	AAIMGAPGSGK+AAIMGAPGSGKGTVSSR+AYQIDTVINLNVPFEVIKQR+GTEIGVLAKTFIDQGK+GTVSSRITKHFELK+HLSSGDLLRDNMLR+HLSSGDLLRDNMLRGTEIGVLAK+LLRAAIMGAPGSGK+LPQRSQETSVTP+MGASARLLRAAIMGAPGSGK+NLTQYNWLLDGFPR
195	sp|P08831|IL1A_BOVIN tr|L8IYR5|L8IYR5_9CETA	1	Interleukin-1 alpha OS=Bos taurus GN=IL1A PE=2 SV=1;Interleukin-1 alpha OS=Bos mutus GN=M91_19272 PE=3 SV=1	16	11	0.004	5	0.13	0.04	0.3	0.05	0.433333	0.25	0.04	0.24	0.04	DETNLLFFWEK+LSFKENVVMVAASGK+LSFKENVVMVAASGKILK+SFYDASYEPLR+TSKLSFKENVVMVAASGK
196	sp|P09487|PPBT_BOVIN	1	Alkaline phosphatase, tissue-nonspecific isozyme OS=Bos taurus GN=ALPL PE=1 SV=2	34	4	0.003	2	0.11	0.06	0.36	0.02	0.305556	0.25	0	0.26	0.04	ANEGTVGVSAATQRSQCNTTQGNEVTSILRWAK+DAGKSVGIVTTTR+DIAYQLMHNIKDIEVIMGGGR+DIAYQLMHNIKDIEVIMGGGRK+DQAQQTLK+DQAQQTLKNALR+GTRLDGLNLIDIWK+HETHGGEDVAVFAK+ILNKNPKGFFLLVEGGR+MGVSTVTAARILK+NNATDPSLSEMVEMAIR+NNATDPSLSEMVEMAIRILNK+NPKGFFLLVEGGR+NRTDVEYELDEKAR+NVIMFLGDGMGVSTVTAAR+SQCNTTQGNEVTSILR
197	sp|P09851|RASA1_BOVIN tr|F1N7N8|F1N7N8_BOVIN tr|L8I139|L8I139_9CETA	1	Ras GTPase-activating protein 1 OS=Bos taurus GN=RASA1 PE=1 SV=1;Ras GTPase-activating protein 1 OS=Bos taurus GN=RASA1 PE=4 SV=2;Ras GTPase-activating protein 1 (Fragment) OS=Bos mutus GN=M91_08221 PE=4 SV=1	20.7	14	0.004	3	0.1	0.02	0.39	0.1	0.25641	0.21	0.02	0.22	0.1	ATATQFVHHALKDSILR+CQLSRLQKGHATDEWFLLSSHIPLK+DSILRIMESK+EPYMEGVNPFIKSNK+ESDRRPGSFVLSFLSQTNVVNHFR+IFMASEILPPTLR+IIAMCGDYYIGGR+IIAMCGDYYIGGRR+IMPEEEYSEFKELILQK+LESLLLCTLNDR+QAGKSGSYLIR+SGSYLIRESDR+SKDPDILFMRCQLSR+TDLCRDLAALHEICVAHSDELR+TRVVSGFVFLR
198	sp|P0CG10|CTF8A_BOVIN tr|L8IJX0|L8IJX0_9CETA	1	Chromosome transmission fidelity protein 8 homolog isoform 2 OS=Bos taurus GN=CHTF8 PE=2 SV=1;Chromosome transmission fidelity protein 8-like protein isoform 2 OS=Bos mutus GN=M91_18230 PE=4 SV=1	27	20	0.006	9	0.16	0.01	0.35	0.03	0.457143	0.14	0.03	0.31	0.01	AGGLGPGPNLDARAGGLLGTGSGLNLR+ASGPLGPNPANFPR+DPGLASFPR+ERPTPWTRAPLPPR+ERPTPWTRAPLPPRGR+LPGPIGPNSGPGSR+MAGPQGLDLAPILR+SAGLQGSSPAVFPR+SGFVGTNPAPR+SGGPMGPGSGPSLR+SSGLGPGLGPNPR+SSGLGPGLGPNPRAGGLGPGPNLDAR
199	sp|P0CG25|EFCC1_BOVIN	1	EF-hand and coiled-coil domain-containing protein 1 OS=Bos taurus GN=EFCC1 PE=2 SV=1	28.3	16	0.004	7	0.16	0.02	0.34	0.04	0.470588	0.16	0.03	0.29	0.04	AAVLRSLGRVR+EKWQEAQRLPAEVTALLAGLSGCGSGCDDQTAK+ELEALARQMPGLQRGLR+ELRQARGALAAAEAQAGR+LARLEEENSSLR+LEEENSSLRELVEDLR+LPRADFR+QARGALAAAEAQAGR+QARGALAAAEAQAGRLR+QELQMVEAER+QMPGLQRGLRLLEGELR+RAARPPGPDGGPDGER+SQAGAQEAARGEPEAAAR+TPEEEAELQRK
200	sp|P10881|LA_BOVIN tr|L8J0X0|L8J0X0_9CETA	1	Lupus La protein homolog OS=Bos taurus GN=SSB PE=2 SV=2;Lupus La protein-like protein OS=Bos mutus GN=M91_01865 PE=4 SV=1	29	10	0.003	3	0.22	0.02	0.3	0.01	0.733333	0.2	0.01	0.28	0.01	AELMEISEDKTKIR+DENGASRAVK+EWLEDKGQVLNIQMRR+FLKEQIK+FLKEQIKLDEGWVPLEIMIK+GFPTDAALDDIK+KTKFDSDDER+LAENAEMKSLEEK+LDEGWVPLEIMIKFNR+LDEGWVPLEIMIKFNRLNR+MAENGDNEKMAALEAK
201	sp|P10894|PLCB1_BOVIN tr|L8IAH3|L8IAH3_9CETA	1	1-phosphatidylinositol 4,5-bisphosphate phosphodiesterase beta-1 OS=Bos taurus GN=PLCB1 PE=1 SV=1;Phosphoinositide phospholipase C (Fragment) OS=Bos mutus GN=M91_20111 PE=4 SV=1	21.7	13	0.004	4	0.2	0.04	0.27	0.02	0.740741	0.17	0.02	0.33	0.04	DKQQQQLLNLR+HFDPFTEGIVDGIVANTLSVK+ISEDSNHSSAPPLMTSDSGK+KRVETALEACSLPSSR+LEEAQSKRQEK+LFSADRKR+LKPEFMR+LRELLDVGNIGR+LVEKHKEIR+NDSIPQEDFTPEVYR+QEQVQVLIEKYEPNNSLAKK+QQQQLLNLRQEQYYSEK+QTLEELK+QVLLSGCRCVELDCWKGR+SGYRLKPEFMR+SKPYLTVDQMMDFINLKQR+TEMIRSYIQEVVQYIKR+VFLNNLCPRPEIDNIFSEFGAK+YVNLMEQRAK
202	sp|P11181|ODB2_BOVIN tr|L8HZ69|L8HZ69_9CETA	1	Lipoamide acyltransferase component of branched-chain alpha-keto acid dehydrogenase complex, mitochondrial OS=Bos taurus GN=DBT PE=1 SV=2;Uncharacterized protein OS=Bos mutus GN=M91_14832 PE=3 SV=1	19.3	9	0.003	4	0.25	0.06	0.15	0.04	1.66667	0.29	0.07	0.24	0.06	EDILNYLEKQTGAILPPSPK+EELKPIAFARGIK+LAMENNIKLSEVIGSGK+LSEVIGSGK+MAAALVLRTWSRAAGQLICVR+QTGAILPPSPK+QTGAILPPSPKAEIMPPPPKPKDR+TLATPAVRR
208	sp|P14099-2|PDE2A_BOVIN sp|P14099|PDE2A_BOVIN tr|F1N0Y8|F1N0Y8_BOVIN tr|L8IS18|L8IS18_9CETA	1	Isoform PDE2A3 of cGMP-dependent 3',5'-cyclic phosphodiesterase OS=Bos taurus GN=PDE2A;cGMP-dependent 3',5'-cyclic phosphodiesterase OS=Bos taurus GN=PDE2A PE=1 SV=2;cGMP-dependent 3',5'-cyclic phosphodiesterase OS=Bos taurus GN=PDE2A PE=4 SV=1;cGMP-dependent 3',5'-cyclic phosphodiesterase (Fragment) OS=Bos mutus GN=M91_03536 PE=4 SV=1	19.9	12	0.003	3	0.11	0.05	0.39	0.09	0.282051	0.17	0.03	0.28	0.01	DIILATDLAHHLR+DLQKMAEVGYDR+FCLMVKK+HTLVALKRVQALQQR+KVNEAQYRSHLANEMMMYHMK+LKCECQALLQVAK+LLHDGIQPVAAIDSNFASFTYTPR+MAEVGYDR+MLDLMRDIILATDLAHHLR+NENQEVIGVAELVNK+NILCFPIK+RLGCNGLGPSDLPGKPLAR+SLPEDDTSMAILSMLQDMNFINNYK
211	sp|P16586|PDE6C_BOVIN tr|E1BKB8|E1BKB8_BOVIN tr|L8IU22|L8IU22_9CETA	1	Cone cGMP-specific 3',5'-cyclic phosphodiesterase subunit alpha' OS=Bos taurus GN=PDE6C PE=1 SV=1;Cone cGMP-specific 3',5'-cyclic phosphodiesterase subunit alpha' OS=Bos taurus GN=PDE6C PE=4 SV=2;Cone cGMP-specific 3',5'-cyclic phosphodiesterase subunit alpha OS=Bos mutus GN=M91_12384 PE=4 SV=1	12	20	0.006	5	0.19	0.03	0.26	0.05	0.730769	0.24	0.04	0.27	0.03	DIAQEMLMNHTKATPDEIK+EVLAVFMAVNK+KGYRAVTYHNWR+LAQLLQADRCSMFLCR+LHGSSILER+MKVIEEMKK+NSHFSDFMDK+NSHFSDFMDKQTGYVTR+VFEELTDVER
214	sp|P17697|CLUS_BOVIN	1	Clusterin OS=Bos taurus GN=CLU PE=1 SV=1	19.4	10	0.003	5	0.22	0.02	0.2	0.03	1.1	0.25	0.04	0.29	0.03	CQEILEVDCSASNPTQTLLR+ELQEMSTEGSK+EQSHVMDVMEDSFTR+GSLFFNPK+GSLFFNPKSR+GSLFFNPKSRFAR+HNSTGCLRMK+MLNTSALLK+TVCKEIRHNSTGCLR
215	sp|P18892|BT1A1_BOVIN tr|E1BHI7|E1BHI7_BOVIN tr|F1MZQ4|F1MZQ4_BOVIN tr|L8HLI3|L8HLI3_9CETA	1	Butyrophilin subfamily 1 member A1 OS=Bos taurus GN=BTN1A1 PE=1 SV=2;Butyrophilin subfamily 1 member A1 OS=Bos taurus GN=BTN1A1 PE=1 SV=2;Butyrophilin subfamily 1 member A1 (Fragment) OS=Bos taurus GN=BTN1A1 PE=1 SV=2;Butyrophilin subfamily 1 member A1 OS=Bos mutus GN=M91_00347 PE=4 SV=1	26.2	14	0.003	3	0.14	0.02	0.32	0.02	0.4375	0.23	0.04	0.3	0.03	EKVSPAVFVSR+EKVSPAVFVSREGQEQEGEEMAEYR+IQEVKASDDGEYR+NLLLGQEK+NPDEEGLFTVR+NPDEEGLFTVRASVIIR+THRGEEFPSMSESR+VSPAVFVSREGQEQEGEEMAEYRGR
216	sp|P19238|CD5_BOVIN tr|L8I6F6|L8I6F6_9CETA	1	T-cell surface glycoprotein CD5 OS=Bos taurus GN=CD5 PE=2 SV=2;T-cell surface glycoprotein CD5 OS=Bos mutus GN=M91_18529 PE=4 SV=1	16.7	8	0.002	0	-9	-9	-9	-9	1	-9	-9	-9	-9	KVQPWVGGQALGLICSDFQPK+LVGGSDVCEGSVEVR+LVGGSDVCEGSVEVRSGK+QRQWIGPTGMNQNMSFHR+TTAPPTTSPPTTTPEPTAPPR
217	sp|P19483|ATPA_BOVIN tr|F1MLB8|F1MLB8_BOVIN tr|L8IQG1|L8IQG1_9CETA	1	ATP synthase subunit alpha, mitochondrial OS=Bos taurus GN=ATP5A1 PE=1 SV=1;ATP synthase subunit alpha OS=Bos taurus GN=ATP5A1 PE=1 SV=1;ATP synthase subunit alpha OS=Bos mutus GN=M91_01007 PE=3 SV=1	41.6	43	0.012	13	0.2	0.02	0.27	0.02	0.740741	0.17	0.02	0.32	0.02	AVDSLVPIGRGQR+EIVTNFLAGFEA+ELIIGDRQTGK+ISVREPMQTGIK+NLHASNSR+NVQAEEMVEFSSGLK+QAVAYRQMSLLLR+QAVAYRQMSLLLRRPPGR+QGQYSPMAIEEQVAVIYAGVR+QIFLETELFYK+QMSLLLRRPPGR+RAGLVSKNALGSSFIAAR+RFNDGTDEKK+RTGAIVDVPVGEELLGR+TDGKISEESDAK+TGTAEVSSILEER+VGLKAPGIIPRISVR+VLSIGDGIAR+VVDALGNAIDGKGPIGSK
218	sp|P19534|CADH2_BOVIN tr|F1N0S5|F1N0S5_BOVIN tr|L8I3Z5|L8I3Z5_9CETA	1	Cadherin-2 (Fragment) OS=Bos taurus GN=CDH2 PE=2 SV=1;Cadherin-2 OS=Bos taurus GN=CDH2 PE=4 SV=2;Cadherin-2 (Fragment) OS=Bos mutus GN=M91_21275 PE=4 SV=1	10.9	5	0.002	2	0.26	0.06	0.28	0.02	0.928571	0.19	0.01	0.26	0.02	IDSVNGQITTIAVLDR+KLADMYGGGDD+LDERPIHAEPQYPVR+LNGDFAQLNLK+LSLKPALPEDSVK+LSLKPALPEDSVKESR+LSLKPALPEDSVKESREIEEIVFPR+NWTITRLNGDFAQLNLKIK+SNISILR
220	sp|P20237|GBRA4_BOVIN tr|L8IPA6|L8IPA6_9CETA	1	Gamma-aminobutyric acid receptor subunit alpha-4 OS=Bos taurus GN=GABRA4 PE=2 SV=2;Gamma-aminobutyric acid receptor subunit alpha-4 OS=Bos mutus GN=M91_15793 PE=3 SV=1	19.3	28	0.005	5	0.17	0.02	0.21	0.04	0.809524	0.28	0.04	0.3	0.02	EKHPETPLQNTNANLSMR+EKHPETPLQNTNANLSMRK+IKTTVNSIGTSGK+ILDSLLDGYDNR+KTSKAPQEISAAPVLR+LNNMMVTK+LRPGFGGPVTEVK+LTISAECPMR+QVPVGSASTQHVFGSR+TTVNSIGTSGK
221	sp|P22457|FA7_BOVIN	1	Coagulation factor VII OS=Bos taurus GN=F7 PE=1 SV=2	15.4	7	0.003	5	0.19	0.01	0.31	0.01	0.612903	0.16	0.04	0.31	0.04	GVTARKLMVVLVPR+IVGGHVCPKGECPWQAMLK+LNGALLCGGTLVGPAWVVSAAHCFERLR+NGSKPQGR
222	sp|P23389|SCG1_BOVIN tr|L8IWM4|L8IWM4_9CETA	1	Secretogranin-1 OS=Bos taurus GN=CHGB PE=1 SV=2;Secretogranin-1 (Fragment) OS=Bos mutus GN=M91_03055 PE=4 SV=1	12.7	4	0.002	4	0.15	0.02	0.34	0.04	0.441176	0.19	0.08	0.24	0.08	ARGGEAAAYSTLGQTDEK+ARHPAHFRALEEGAEYGEEVR+GGEAAAYSTLGQTDEKR+GKQYAPHHITEKR+HPAHFRALEEGAEYGEEVR+RERGEVGSEER+WQPQGDPRDADENREEAR
223	sp|P23726|P85B_BOVIN tr|L8IH63|L8IH63_9CETA	1	Phosphatidylinositol 3-kinase regulatory subunit beta OS=Bos taurus GN=PIK3R2 PE=1 SV=1;Phosphatidylinositol 3-kinase regulatory subunit beta (Fragment) OS=Bos mutus GN=M91_16411 PE=4 SV=1	21	44	0.009	10	0.17	0.02	0.27	0.03	0.62963	0.18	0.02	0.34	0.01	DQYLVWLTQKGARQK+DTPDGTFLVR+EDSVEAVGAQLK+EDSVEAVGAQLKVYHQQYQDK+EYDQLYEEYTRTSQELQMK+GGNNKLIKVFHR+ILLNSERLK+INRTQAEEMLSGK+INRTQAEEMLSGKR+IQGEYTLTLR+LIKVFHR+LRDTPDGTFLVR+RDGTFLIRESSQR+TKLEQELRAQASDNR+TQAEEMLSGK+TQAEEMLSGKR+TQAEEMLSGKRDGTFLIR+TWYVGKINRTQAEEMLSGK
228	sp|P26884|FKBP3_BOVIN tr|L8IT18|L8IT18_9CETA	1	Peptidyl-prolyl cis-trans isomerase FKBP3 OS=Bos taurus GN=FKBP3 PE=1 SV=2;Peptidyl-prolyl cis-trans isomerase OS=Bos mutus GN=M91_01165 PE=4 SV=1	24.1	5	0.002	3	0.18	0.08	0.28	0.02	0.642857	0.1	0.07	0.36	0.02	AWTVEQLRSEQLPK+GWDEALLTMSKGEKAR+LNEDKPKETKSEETLDEGPPK+NVKLNEDKPK+NVKLNEDKPKETK
229	sp|P27117|DCOR_BOVIN tr|L8HNA3|L8HNA3_9CETA	1	Ornithine decarboxylase OS=Bos taurus GN=ODC1 PE=2 SV=1;Ornithine decarboxylase OS=Bos mutus GN=M91_12561 PE=3 SV=1	20.2	11	0.004	1	0.14	99.99	0.29	99.99	0.482759	0.2	99.99	0.37	99.99	DAFYVADLGDILKK+IATDDSKAVCR+IIYANPCKQVSQIK+TIVKTLAAIGTGFDCASK+VGFNMYLLDIGGGFPGSEDVKLK+VTPFYAVKCNDSR
231	sp|P27674|GTR1_BOVIN tr|L8I9W6|L8I9W6_9CETA	1	Solute carrier family 2, facilitated glucose transporter member 1 OS=Bos taurus GN=SLC2A1 PE=1 SV=1;Solute carrier family 2, facilitated glucose transporter member 1 (Fragment) OS=Bos mutus GN=M91_02916 PE=3 SV=1	20	10	0.003	5	0.16	0.02	0.32	0.01	0.5	0.2	0.02	0.31	0.01	DLQEMKEESR+KVTILELFRSAAYR+LGKSFEMLILGR+NEENRAKSVLK+QGGASQSDK+SFEMLILGR+TLHLIGLAGMAGCAVLMTIALALLER+TPEELFHPLGADSQV
232	sp|P29105|HPCL1_BOVIN tr|L8HKI5|L8HKI5_9CETA	1	Hippocalcin-like protein 1 OS=Bos taurus GN=HPCAL1 PE=1 SV=4;Hippocalcin-like protein 1 OS=Bos mutus GN=M91_12562 PE=4 SV=1	31.6	4	0.002	3	0.2	0.03	0.31	0.04	0.645161	0.14	0.05	0.32	0.02	DCPTGHLTVDEFK+LEQKLKWAFSMYDLDGNGYISR+LRPEVLQDLR+NGDGTIDFR+RTDKIFR
233	sp|P29473|NOS3_BOVIN tr|F1MY54|F1MY54_BOVIN	1	Nitric oxide synthase, endothelial OS=Bos taurus GN=NOS3 PE=1 SV=3;Nitric oxide synthase OS=Bos taurus GN=NOS3 PE=3 SV=1	19.8	32	0.007	11	0.18	0.01	0.29	0.01	0.62069	0.19	0.01	0.33	0.01	CVGRIQWGKLQVFDAR+DEVQDAQERGVFGR+DEVQDAQERGVFGRVLTAFSR+ESSNTDSAGALGTLR+EVANAVKISASLMGTLMAK+GAVPWAFDPPGPDTPGP+GSATKGAGITRK+IRTQSFSLQERHLR+ISASLMGTLMAK+ISASLMGTLMAKR+KESSNTDSAGALGTLR+LDTAGQEGLQYQPGDHIGICPPNRPGLVEALLSR+MTLVFGCR+QALTFFLDITSPPSPRLLR+TQEVTSRIR+TQSFSLQERHLR+TYVQDILR+VKATILYASETGR+VKATILYASETGRAQSYAQQLGR+YNILEDVAVCMDLDTRTTSSLWK
237	sp|P31408|VATB2_BOVIN tr|L8IAY4|L8IAY4_9CETA	1	V-type proton ATPase subunit B, brain isoform OS=Bos taurus GN=ATP6V1B2 PE=1 SV=3;V-type proton ATPase subunit B, brain isoform (Fragment) OS=Bos mutus GN=M91_08859 PE=3 SV=1	25.8	27	0.006	9	0.18	0.01	0.28	0.01	0.642857	0.19	0.02	0.33	0.01	EQALAVSR+EQALAVSRNYLSQPR+EVSAAREEVPGR+IYPEEMIQTGISAIDGMNSIAR+KTSCEFTGDILR+LMKSAIGEGMTR+LTYKTVSGVNGPLVILDHVKFPR+NYLSQPR+QIYPPINVLPSLSRLMK+SGQVLEVSGSK+TVSGVNGPLVILDHVK+VFNGSGKPIDR
238	sp|P31754|UMPS_BOVIN tr|L8INT8|L8INT8_9CETA	1	Uridine 5'-monophosphate synthase OS=Bos taurus GN=UMPS PE=2 SV=1;Uridine 5'-monophosphate synthase OS=Bos mutus GN=M91_04241 PE=3 SV=1	18.3	19	0.007	12	0.19	0.02	0.3	0.01	0.633333	0.19	0.01	0.29	0.02	EGLKVTDAVVLVDR+EQGGRDNLQAR+EQGGRDNLQARGIR+GSDIIIVGR+GSDIIIVGRGIIASANQLEAAKMYR+INAETVER+KETNLCLSADVSESR+SGLSSPVYIDLR
239	sp|P31976|EZRI_BOVIN tr|L8IBW5|L8IBW5_9CETA	1	Ezrin OS=Bos taurus GN=EZR PE=1 SV=2;Ezrin (Fragment) OS=Bos mutus GN=M91_06270 PE=4 SV=1	23	12	0.004	8	0.2	0.03	0.32	0.03	0.625	0.13	0.02	0.29	0.03	DDKLTPKIGFPWSEIR+DSAMLEYLK+EELERQAADQIK+ENEVEEWQLRAK+IDEFEAM+ITEAEKNER+LQDYEEKTRK+NISFNDK+QLMTLTSELSQAR+QLMTLTSELSQARDENKR+RILQLCMGNHELYMR+RTHNDIIHNENMRQGR+THNDIIHNENMR+THNDIIHNENMRQGR+VQRQLMTLTSELSQAR
241	sp|P32871|PK3CA_BOVIN tr|L8IQ23|L8IQ23_9CETA	1	Phosphatidylinositol 4,5-bisphosphate 3-kinase catalytic subunit alpha isoform OS=Bos taurus GN=PIK3CA PE=1 SV=1;Phosphatidylinositol-4,5-bisphosphate 3-kinase catalytic subunit alpha isoform (Fragment) OS=Bos mutus GN=M91_09224 PE=4 SV=1	30	18	0.005	5	0.17	0.02	0.3	0.04	0.566667	0.2	0.03	0.3	0.01	ACGMYLKHLNR+DFLWSHR+EAGFSYSHAGLSNR+ENDKEQLR+ESLYSQLPMDCFTMPSYSRR+FLVEQMR+FPDMSVIEEHANWSVSR+IKILCATYVNVNIR+ILCATYVNVNIR+ILVECLLPNGMIVTLECLREATLITIK+IMENIWQNQGLDLR+INHDCVPEQVIAEAIR+IYVRTGIYHGGEPLCDNVNTQR+LCLSICSVKGR+LINLTDILKQEK+LSQYLIQLVQVLKYEQYLDNLLVR+MPNLMLMAKESLYSQLPMDCFTMPSYSRR+NGDDLRQDMLTLQIIR+NSHTIMQIQCKGGLK+QDMLTLQIIR+QHANLFINLFSMMLGSGMPELQSFDDIAYIR+RNILNVCKEAVDLR+SCIMLGRMPNLMLMAK+VQMKFLVEQ…
247	sp|P38657|PDIA3_BOVIN tr|A5D7E8|A5D7E8_BOVIN tr|L8IQN1|L8IQN1_9CETA	1	Protein disulfide-isomerase A3 OS=Bos taurus GN=PDIA3 PE=2 SV=1;Protein disulfide-isomerase OS=Bos taurus GN=PDIA3 PE=1 SV=1;Protein disulfide-isomerase OS=Bos mutus GN=M91_01180 PE=3 SV=1	23.6	8	0.003	4	0.19	0.01	0.3	0.01	0.633333	0.21	0	0.3	0.02	DGEESGAYDGPR+GIVPLAKVDCTANTNTCNKYGVSGYPTLK+LALFPGLALLLAAAR+LRKDPNIVIAK+LRRLALFPGLALLLAAAR+QNPKKYEGGR+REATNPPVIQEEKPKK+RLALFPGLALLLAAAR+TADGIVSHLK+TVAYTEQKMTSGK
250	sp|P46198|IF2M_BOVIN tr|L8J0F8|L8J0F8_9CETA	1	Translation initiation factor IF-2, mitochondrial OS=Bos taurus GN=MTIF2 PE=1 SV=1;Translation initiation factor IF-2, mitochondrial OS=Bos mutus GN=M91_19377 PE=3 SV=1	18	18	0.006	8	0.18	0.02	0.3	0.03	0.6	0.21	0.01	0.29	0.02	CDKAEADPEKVK+EDLKLIEEKR+EKRQQQPLKPK+ERSYIKYR+EVEVWLGMTVEELAR+EVEVWLGMTVEELARAMEK+GSILVAGKSWAK+GSILVAGKSWAKVR+GSLISLKHHK+IKLHKIIYR+ITFLDTPGHAAFSAMRAR+KGSILVAGKSWAK+LLVTKKEK+QLHSLCQR+SKKEVEVWLGMTVEELAR
251	sp|P49259|PLA2R_BOVIN tr|L8IGJ2|L8IGJ2_9CETA	1	Secretory phospholipase A2 receptor OS=Bos taurus GN=PLA2R1 PE=1 SV=1;Secretory phospholipase A2 receptor (Fragment) OS=Bos mutus GN=M91_05747 PE=4 SV=1	11.8	23	0.005	4	0.2	0.04	0.21	0.05	0.952381	0.23	0.05	0.31	0.04	GSNLLTIK+HSHIIFGRLAQFR+IRALSKYGVNWWIGLR+KTITGPLQYLVQVK+MEADIHTVKK+NCAVYKANKTLLPSYCGSK+NIPNHNTTEVQK+QPRYSGGCVVMR+QPRYSGGCVVMRGR+RIPLCGLLSNNPNFHFTGK+TAGQQLEPVK+TGLVLSDTESGCQKGWERHGK+TLLPSYCGSK+YLNPTDHGVVEK+YSGGCVVMRGR
253	sp|P51176|TGM2_BOVIN tr|L8IM46|L8IM46_9CETA	1	Protein-glutamine gamma-glutamyltransferase 2 OS=Bos taurus GN=TGM2 PE=1 SV=1;Protein-glutamine gamma-glutamyltransferase 2 (Fragment) OS=Bos mutus GN=M91_02800 PE=4 SV=1	16.7	22	0.009	11	0.18	0.02	0.31	0.01	0.580645	0.18	0.01	0.32	0.02	DGCQRVK+DIYLENPEIKIR+DLLSLSLEPYSEK+DLLSLSLEPYSEKSIPLR+EDITHSYKYPEGSPEER+EETGVAMRIR+LSDATEEGAWAAVAADQR+LVNKEETGVAMRIR+VDLLPLYVGR+VVSGMVNCNDDQGVLLGR
254	sp|P52173|IL5_BOVIN tr|B5LVM9|B5LVM9_BOVIN tr|B5LVN5|B5LVN5_BOSIN tr|B5LVS3|B5LVS3_BOSGA tr|B5LVT5|B5LVT5_BISBI tr|L8J309|L8J309_9CETA	1	Interleukin-5 OS=Bos taurus GN=IL5 PE=2 SV=1;Interleukin 5 OS=Bos taurus GN=IL5 PE=4 SV=1;Interleukin 5 OS=Bos indicus GN=IL5 PE=4 SV=1;Interleukin 5 OS=Bos gaurus GN=IL5 PE=4 SV=1;Interleukin 5 OS=Bison bison GN=IL5 PE=4 SV=1;Interleukin-5 OS=Bos mutus GN=M91_18679 PE=4 SV=1	23.9	2	0.001	1	0.18	99.99	0.3	99.99	0.6	0.17	99.99	0.35	99.99	IFQNLSLIK+VKQFLDYLQVFLGVINTEWTMES
256	sp|P53619|COPD_BOVIN tr|L8IFV9|L8IFV9_9CETA	1	Coatomer subunit delta OS=Bos taurus GN=ARCN1 PE=1 SV=1;Coatomer subunit delta (Fragment) OS=Bos mutus GN=M91_09730 PE=4 SV=1	26	13	0.004	7	0.19	0.03	0.28	0.03	0.678571	0.13	0.03	0.34	0.03	DGGLQNMELHGMIMLR+IEEKITLTCGR+IEGLLAAFPK+KLFTAESLIGLKNPEK+LFTAESLIGLK+LKSEGENIISSNMGK+LKSEGENIISSNMGKR+NSNILEDLETLR+NSNILEDLETLRLFSR+QHTFVETESVR+QHTFVETESVRYVYQPMEKLYMVLITTK+TSEATKVHAPPINMESVHMK+VHAPPINMESVHMK
258	sp|P56722|PTPRN_BOVIN tr|L8IW25|L8IW25_9CETA	1	Receptor-type tyrosine-protein phosphatase-like N OS=Bos taurus GN=PTPRN PE=1 SV=1;Receptor-type tyrosine-protein phosphatase-like N (Fragment) OS=Bos mutus GN=M91_13958 PE=4 SV=1	13.2	17	0.007	7	0.16	0.02	0.26	0.02	0.615385	0.25	0.03	0.31	0.01	AEGPPEPSR+DGSRGSESSPGMVSVDPLPK+DGSRGSESSPGMVSVDPLPKAEAPAFLSR+GSESSPGMVSVDPLPKAEAPAFLSR+IPRLRPPEPHPR+IRHNEQNLSLADVTQQAGLVK+LLQILPK+LPGRPGGPGGSGGLR+TGTYILIDMVLNR+TGTYILIDMVLNRMAK+VLLCLLLLGSRPGGCNAISAHGCLFDR
259	sp|P56966|GGPPS_BOVIN tr|L8HZ05|L8HZ05_9CETA	1	Geranylgeranyl pyrophosphate synthase OS=Bos taurus GN=GGPS1 PE=1 SV=2;Geranylgeranyl pyrophosphate synthase OS=Bos mutus GN=M91_17224 PE=3 SV=1	32.7	7	0.002	2	0.23	0.01	0.22	0.04	1.04545	0.24	0.02	0.31	0	EDLKPLLDTLGLFFQIR+GGNPELVALIKHLSKMFK+LQIIIEVTEMLHNASLLIDDIEDNSKLRR+MEKTQETVQR+NTLKELESKAYK+QIDARGGNPELVALIK+TENIDIK
260	sp|P57709|AT2C1_BOVIN	1	Calcium-transporting ATPase type 2C member 1 OS=Bos taurus GN=ATP2C1 PE=2 SV=1	20	13	0.003	3	0.14	0.01	0.3	0.06	0.466667	0.16	0.09	0.35	0.03	AQMGSAGLR+DLVPGDTVCLSVGDR+DLYQQEKAQMGSAGLR+DTTMTFTCFVFFDMFNALSSRSQTK+GQTLTLTQQQRDLYQQEKAQMGSAGLR+ILVSSIIIVCGTLFVFWR+MITGDSQETAVAIASR+MMQAEEAPKTPLQKSMDLLGK+NEMTVTHIFTSDGLR+SMDLLGKQLSFYSFGIIGIIMLVGWLLGK+TGVKEAVTTLIASGVSIK+YPIHAIRKYLSMLR
261	sp|P58874|OPT_BOVIN tr|L8ISX5|L8ISX5_9CETA	1	Opticin OS=Bos taurus GN=OPTC PE=1 SV=2;Opticin OS=Bos mutus GN=M91_14775 PE=4 SV=1	19.6	25	0.007	12	0.19	0.01	0.3	0.02	0.633333	0.17	0.01	0.32	0.01	GTSLASLTRTR+IDLSGNSISSIDDK+IDLSGNSISSIDDKALR+IDLSGNSISSIDDKALRLLPALR+LDGNPINLSLFPSAYFCLPR+TRFTQSTEAAR
262	sp|P58875|S14L2_BOVIN tr|L8J460|L8J460_9CETA	1	SEC14-like protein 2 OS=Bos taurus GN=SEC14L2 PE=1 SV=2;SEC14-like protein 2 OS=Bos mutus GN=M91_07616 PE=4 SV=1	23.8	12	0.003	4	0.17	0.04	0.38	0.03	0.447368	0.07	0.03	0.34	0.03	AGEMREVLPSQR+ARNFNLQKSEAMLR+INYGGDIPKKYYVR+KIEATTLIYDCEGLGLK+NFNLQKSEAMLR+QDLFKTKMR+QQYEHSVQISR+QRAGEMREVLPSQR+TKMRDCELLLQECVR+TKVGERQR
263	sp|P61420|VA0D1_BOVIN tr|L8IHS3|L8IHS3_9CETA	1	V-type proton ATPase subunit d 1 OS=Bos taurus GN=ATP6V0D1 PE=1 SV=1;V-type proton ATPase subunit d 1 OS=Bos mutus GN=M91_18269 PE=4 SV=1	12	5	0.003	4	0.18	0.02	0.27	0.03	0.666667	0.19	0.02	0.34	0.01	AKLFPHCGRLYPEGLAQLAR+EDRAKLFPHCGR+EKMVVEFRHMR+LFPHCGR+LFPHCGRLYPEGLAQLARADDYEQVK
264	sp|P68399|CSK21_BOVIN tr|E1BH82|E1BH82_BOVIN tr|L8J093|L8J093_9CETA	1	Casein kinase II subunit alpha OS=Bos taurus GN=CSNK2A1 PE=1 SV=1;Casein kinase II subunit alpha OS=Bos taurus GN=CSNK2A1 PE=4 SV=2;Casein kinase II subunit alpha OS=Bos mutus GN=M91_18135 PE=4 SV=1	19.9	4	0.002	2	0.24	0.06	0.18	0.03	1.33333	0.15	0.04	0.42	0.06	EYNVRVASR+GGPNIITLADIVK+KEPFFHGHDNYDQLVR+QLYQTLTDYDIR+VLGTEDLYDYIDK+YNIELDPRFNDILGR
265	sp|P69341|PARN_BOVIN tr|L8HXS7|L8HXS7_9CETA	1	Poly(A)-specific ribonuclease PARN OS=Bos taurus GN=PARN PE=1 SV=2;Poly(A)-specific ribonuclease PARN (Fragment) OS=Bos mutus GN=M91_01463 PE=4 SV=1	13.6	14	0.003	2	0.18	0.02	0.23	0.07	0.782609	0.23	0.03	0.35	0.05	DHVLHVTFPK+DIINNTSLAELEK+EQEELNDAVGFSR+LMASTQPFK+NLDLEPCTGFQR+NLSPSRAEAGLEAR+YIVISKVDEEERK
267	sp|P79122|PININ_BOVIN	1	Pinin OS=Bos taurus GN=PNN PE=2 SV=3	28.2	20	0.005	2	0.1	0.01	0.32	0.03	0.3125	0.18	0.04	0.39	0.01	DAKAVSSSGMPR+DAKAVSSSGMPRFKPGQL+DLEGAVSRLGGER+DSSSSTTSSSESRSR+EFLVESVKLTEVPTEPVLTVHSESK+ESLKNVDENIR+ETPERPGPIFGLLMGTLQKFKQESTVATER+GGSSRDAKAVSSSGMPR+GSLLLRR+IFGLLMGTLQK+LIEESQR+LLALSGPGGGR+NVDENIR+QEMEVKMEEETEVR+QESTVATERQKR+QRDLEGAVSR+TLQEQLEKAK+VMLRALDDLVAR+VMLRALDDLVARVGTPSPR+YETKTRSR
268	sp|P79136-2|CAPZB_BOVIN sp|P79136|CAPZB_BOVIN	1	Isoform Beta-2 of F-actin-capping protein subunit beta OS=Bos taurus GN=CAPZB;F-actin-capping protein subunit beta OS=Bos taurus GN=CAPZB PE=1 SV=1	36.8	14	0.005	8	0.12	0.02	0.31	0.02	0.387097	0.19	0.01	0.35	0.04	IKGCWDSIHVVEVQEK+LRKLEVEANNAFDQYR+LTSTVMLWLQTNKSGSGTMNLGGSLTR+NDLVEALK+SGSGTMNLGGSLTR+SGSGTMNLGGSLTRQMEK+SPWSNKYDPPLEDGAMPSARLR+TKDIVNGLR
269	sp|P80025|PERL_BOVIN tr|G3MXZ0|G3MXZ0_BOVIN tr|L8ICE9|L8ICE9_9CETA	1	Lactoperoxidase OS=Bos taurus GN=LPO PE=1 SV=1;Lactoperoxidase (Fragment) OS=Bos taurus GN=LPO PE=1 SV=1;Lactoperoxidase OS=Bos mutus GN=M91_18575 PE=4 SV=1	23.7	9	0.003	3	0.2	0.04	0.17	0.09	1.17647	0.22	0.05	0.35	0.02	GRVGPLLACLLGR+IIKDGGIDPLVR+KPSPCEFINTTAR+LDLSPWASR+LFQPTHKIHGFDLAAINLQR+LMNQDKMVTSELRNK+LNPHWNGEKLYQEAR+MVTSELRNK+QRDSLQKVSFSR+TPDNIDIWIGGNAEPMVERGR+VGPLLACLLGR+VKCDENSPYR
270	sp|P80109|PHLD_BOVIN tr|F1MNM2|F1MNM2_BOVIN tr|L8I4G7|L8I4G7_9CETA	1	Phosphatidylinositol-glycan-specific phospholipase D OS=Bos taurus GN=GPLD1 PE=1 SV=1;Phosphatidylinositol-glycan-specific phospholipase D OS=Bos taurus GN=GPLD1 PE=4 SV=1;Phosphatidylinositol-glycan-specific phospholipase D OS=Bos mutus GN=M91_16493 PE=4 SV=1	14.3	23	0.008	13	0.17	0.01	0.32	0.01	0.53125	0.18	0.01	0.31	0.01	ALEFLHLQDGSINYKELLLR+DTSSQGHLFR+EKNQVIIAAGR+EKNQVIIAAGRSSLGAR+FGSSVITVRSK+GEEDFAWLGYSLHGVNVNNR+ITDATAGLMGEEDGR+LSGVLHIYR+NGFHKNVTAALTK+NQVIIAAGRSSLGAR+SSLGARLSGVLHIYR+SSLGARLSGVLHIYRLGQD
271	sp|P80227|ACPH_BOVIN tr|L8IRI5|L8IRI5_9CETA	1	Acylamino-acid-releasing enzyme OS=Bos taurus GN=APEH PE=1 SV=2;Acylamino-acid-releasing enzyme (Fragment) OS=Bos mutus GN=M91_12445 PE=4 SV=1	11	7	0.003	3	0.14	0.04	0.29	0.06	0.482759	0.2	0.06	0.32	0.05	DLERMENIR+DLMVAQFSTPNLPPCLK+ESPSGTMK+LKSFNLSALEK+RPKAESFFQTK+TPVLLMLGQEDRR+VTVVVVDVVPR
272	sp|P81134|RENR_BOVIN tr|G8JKY4|G8JKY4_BOVIN tr|L8J0I1|L8J0I1_9CETA	1	Renin receptor OS=Bos taurus GN=ATP6AP2 PE=1 SV=2;Renin receptor (Fragment) OS=Bos taurus GN=ATP6AP2 PE=4 SV=1;Renin receptor (Fragment) OS=Bos mutus GN=M91_17207 PE=4 SV=1	21.4	14	0.003	5	0.2	0.03	0.24	0.03	0.833333	0.27	0.04	0.26	0.03	ANSVFEDLSVTLRQLR+ATVMVMVKGVDK+DASKILIDALQK+DISSLLSR+ILIDALQK+NGNWPIPGER+QVKDPSTTYNLAYK
273	sp|P82649|RT22_BOVIN tr|G3N3U9|G3N3U9_BOVIN tr|L8I1M0|L8I1M0_9CETA	1	28S ribosomal protein S22, mitochondrial OS=Bos taurus GN=MRPS22 PE=1 SV=2;28S ribosomal protein S22, mitochondrial OS=Bos taurus GN=MRPS22 PE=4 SV=1;28S ribosomal protein S22, mitochondrial OS=Bos mutus GN=M91_08400 PE=4 SV=1	14.8	4	0.002	2	0.34	0.1	0.1	0.03	3.4	0.23	0.01	0.31	0.06	DRMIQIYFPK+GAGRVYFRAR+IKKPTFMDEEVQSILIKMTGLDLLK+KPTFMDEEVQSILIK+YGKYDLLR
274	sp|P82916|RT17_BOVIN tr|E1BF33|E1BF33_BOVIN tr|L8J5T3|L8J5T3_9CETA	1	28S ribosomal protein S17, mitochondrial OS=Bos taurus GN=MRPS17 PE=1 SV=3;Uncharacterized protein OS=Bos taurus PE=3 SV=1;28S ribosomal protein S17, mitochondrial OS=Bos mutus GN=M91_19497 PE=3 SV=1	22.3	6	0.002	3	0.16	0.02	0.27	0.03	0.592593	0.19	0.02	0.38	0.02	MSVVRSSVHAKWIVGK+SSVHAKWIVGK+VIGTAMQKTAKVR+WIVGKVIGTAMQKTAK
275	sp|P82925|RT31_BOVIN	1	28S ribosomal protein S31, mitochondrial OS=Bos taurus GN=MRPS31 PE=1 SV=3	28.5	8	0.002	0	-9	-9	-9	-9	1	-9	-9	-9	-9	AQKDGEKPK+ETENQGSTKENKK+ISFSNIISDMKVAR+LPLCSAGPEASAATVVPLASPHGTVRTK+MFPRVSAVLPFRPLSR+NYFNEKQDILK+QHEEDSK+QLRQHEEDSK+QTTKSELLR
276	sp|P82929|RT34_BOVIN tr|F1MKN3|F1MKN3_BOVIN tr|L8J5Y7|L8J5Y7_9CETA	1	28S ribosomal protein S34, mitochondrial OS=Bos taurus GN=MRPS34 PE=1 SV=2;28S ribosomal protein S34, mitochondrial OS=Bos taurus GN=MRPS34 PE=4 SV=1;28S ribosomal protein S34, mitochondrial (Fragment) OS=Bos mutus GN=M91_08751 PE=4 SV=1	21	8	0.002	2	0.26	0.02	0.3	0	0.866667	0.07	0.09	0.32	0.09	AMILAERQKNGDPSTEEPMLSLER+ESRLLQLLGR+LLQLLGRLPFFGLGR+LPFFGLGR
277	sp|P83862|OX26_BOVIN	1	Orexigenic neuropeptide QRFP OS=Bos taurus GN=QRFP PE=2 SV=1	6.7	14	0.005	7	0.22	0.01	0.25	0.01	0.88	0.2	0.01	0.32	0.02	EMSWMDPAR
279	sp|Q02337|BDH_BOVIN tr|L8IFB4|L8IFB4_9CETA	1	D-beta-hydroxybutyrate dehydrogenase, mitochondrial OS=Bos taurus GN=BDH1 PE=1 SV=2;D-beta-hydroxybutyrate dehydrogenase, mitochondrial OS=Bos mutus GN=M91_13867 PE=3 SV=1	31.1	18	0.005	5	0.16	0.02	0.26	0.03	0.615385	0.17	0.04	0.37	0.05	AKGRVVNISSMMGR+DKGSDGVKELDSMK+GRVVNISSMMGRMANVAR+GSLLLYSAPFVPVGR+GSLLLYSAPFVPVGRR+KYFDEKVAR+LSRPLSQLPRKTLNFSDR+TYAASVDPVGSK+VVNISSMMGRMANVAR+VVNISSMMGRMANVARSPYCITK+YHPMDYYWWLR
280	sp|Q03763|DSG1_BOVIN tr|F1MIW8|F1MIW8_BOVIN tr|L8IBI6|L8IBI6_9CETA	1	Desmoglein-1 OS=Bos taurus GN=DSG1 PE=1 SV=1;Desmoglein-1 OS=Bos taurus GN=DSG1 PE=4 SV=2;Desmoglein-1 OS=Bos mutus GN=M91_20076 PE=4 SV=1	13	13	0.004	5	0.19	0.02	0.29	0.05	0.655172	0.2	0.03	0.29	0.03	DGSNVIVTER+IIRQEPSDSPMFIINR+MSGGPEICQEYPGTLR+NKVTMEQYK+NPTDLLAIDSKTAIITLR+NSMRECR+QSSNVVVTER+TAIITLRNK+TFVVNSNMGQNYK+TGEINITSIVDR+TMNNFLDR+TTGFELTDGVKMSGGPEICQEYPGTLR+YVMGRNPTDLLAIDSKTAIITLR
282	sp|Q05718|IBP6_BOVIN tr|F1MUK3|F1MUK3_BOVIN tr|L8I6G2|L8I6G2_9CETA	1	Insulin-like growth factor-binding protein 6 OS=Bos taurus GN=IGFBP6 PE=2 SV=2;Insulin-like growth factor-binding protein 6 OS=Bos taurus GN=IGFBP6 PE=4 SV=1;Insulin-like growth factor-binding protein 6 (Fragment) OS=Bos mutus GN=M91_05602 PE=4 SV=1	23.3	9	0.003	5	0.1	0.04	0.37	0.01	0.27027	0.12	0.01	0.38	0.03	DQQRNSGTSTTPSR+ESKPQAGTAR+KHLDSVLQQLQTEVFR+NSGTSTTPSRSNSGGVQDTEMGPCR+SNSGGVQDTEMGPCR
283	sp|Q06807|TIE2_BOVIN tr|L8I0R6|L8I0R6_9CETA tr|Q0IIL9|Q0IIL9_BOVIN	1	Angiopoietin-1 receptor OS=Bos taurus GN=TEK PE=2 SV=1;Angiopoietin-1 receptor (Fragment) OS=Bos mutus GN=M91_17944 PE=4 SV=1;Receptor protein-tyrosine kinase OS=Bos taurus GN=TEK PE=2 SV=1	18.5	14	0.004	3	0.14	0.03	0.25	0.04	0.56	0.26	0.02	0.33	0.03	AKNNPDPTIYPVLDWNDIK+DFAGELEVLCK+DFEALMNQHQDPLEVTQDATREWAK+DGLRMDAAIK+DLAARNILVGENYVAK+DLAARNILVGENYVAKIADFGLSR+EEPAVQFNSGTLALNR+EGVPRMTPK+EGVPRMTPKIEDLPDHIEVNSGK+GQEVYVKKTMGR+HIQVTNEIVTLNYLEPR+IADFGISR+KVLIKEEDAVIYK+NEDQHIDVK+NGSFIHSVPR+NNPDPTIYPVLDWNDIK+QFIHRDLAAR+TEYELCVQLVRR
284	sp|Q06846|RP3A_BOVIN tr|A6QR65|A6QR65_BOVIN	1	Rabphilin-3A OS=Bos taurus GN=RPH3A PE=1 SV=1;Rabphilin 3A homolog (Mouse) OS=Bos taurus GN=RPH3A PE=2 SV=1	30	25	0.007	9	0.18	0.01	0.29	0.02	0.62069	0.18	0.01	0.33	0.02	AEKMEEMEQER+AEKMEEMEQERIGR+DSDSWDQGHGMAAGDPSQSPAGLR+EERTGGIGGYSAAGTREDR+GGLLVGILR+GKILVSLMYSTQQGGLIVGIIR+GSYGPPVR+GSYGPPVRR+GSYGPPVRRASEAR+LENMRKNVAGDGVNR+LHLLPGASK+LHLLPGASKSNK+NFNICLERVIPMKR+NPIWNETLVYHGITDEDMQRK+QEELTDEEKEIINRVIAR+RAGTTGSAR+RASEARMSSSGR+SLDISVWDYDIGK+TGPDMTSAPGR+TGPDMTSAPGRGSYGPPVR
287	sp|Q07537|GALT1_BOVIN tr|L8IWU8|L8IWU8_9CETA	1	Polypeptide N-acetylgalactosaminyltransferase 1 OS=Bos taurus GN=GALNT1 PE=1 SV=1;Polypeptide N-acetylgalactosaminyltransferase OS=Bos mutus GN=M91_09054 PE=3 SV=1	13.4	14	0.005	6	0.21	0.04	0.3	0.06	0.7	0.15	0.03	0.26	0.05	INQFNLMASEMIALNR+LNFRWYPVPQREMDR+NVETNQCLDNMAR+NVETNQCLDNMARK+NVTLPEIF+SGLIRARLK+VDYGDISSRLGLR
288	sp|Q08DA0|RABL6_BOVIN	1	Rab-like protein 6 OS=Bos taurus GN=RABL6 PE=2 SV=1	15.1	12	0.004	5	0.14	0.02	0.35	0.03	0.4	0.17	0.02	0.3	0.04	DAAPRAAKPRPEGPSGK+DDSDLFGLGLEEPGR+DEKRLGAR+DRNIPAGLQSMNQALQR+GPQDSDSDR+GVQYNMKIVIRGDR+LKDDSDLFGLGLEEPGR+LVGSEQAPGR+NIPAGLQSMNQALQR+NTGKTALWHRLQGK
289	sp|Q08DA4|PHTF1_BOVIN tr|L8J4Z0|L8J4Z0_9CETA	1	Putative homeodomain transcription factor 1 OS=Bos taurus GN=PHTF1 PE=2 SV=1;Putative homeodomain transcription factor 1 OS=Bos mutus GN=M91_03155 PE=4 SV=1	20.3	18	0.006	8	0.13	0.02	0.31	0.03	0.419355	0.15	0.02	0.37	0.04	ARGVETLESAPLNGSFWRTLFGNR+EQLTLVNNVLKLSTKLLK+GVETLESAPLNGSFWR+IGAYDQQIWEK+KMDMSVLEISGIIMSR+KMGHIKADLIDVDLIR+KTVNGDGSR+LFSHITSAR+LRKTVNGDGSR+LYGLTMNPLIYNITR+SGMSGGSRSLNMLR+SGMSGGSRSLNMLRR+SLNMLRRDSESTR+TLFGNRMK+TLFGNRMKR+VENIKIWLSLR
290	sp|Q08DA7|GTDC1_BOVIN tr|L8IN72|L8IN72_9CETA	1	Glycosyltransferase-like domain-containing protein 1 OS=Bos taurus GN=GTDC1 PE=2 SV=1;Glycosyltransferase-like domain-containing protein 1 (Fragment) OS=Bos mutus GN=M91_05787 PE=4 SV=1	15.9	4	0.001	2	0.16	0.06	0.32	0.02	0.5	0.1	0.07	0.37	0.15	ENGGNAPSTALPFQQQLR+FRSLLTAEPR+SGPCDAAQQESLGCSVR
291	sp|Q08DB4|CPNE1_BOVIN tr|L8IAV8|L8IAV8_9CETA	1	Copine-1 OS=Bos taurus GN=CPNE1 PE=1 SV=1;Copine-1 OS=Bos mutus GN=M91_17818 PE=4 SV=1	15.3	10	0.002	3	0.18	0.02	0.26	0.04	0.692308	0.21	0.01	0.34	0.03	DFLGKSDPFLEFFR+DNRVVTMEVEAR+GTITVSAQELKDNR+NLDKKDFLGK+NSGTICVK+QGDGKWHLAYR+SDPLCVLLQDVGGGNWTELGR
292	sp|Q08DB5|STX5_BOVIN tr|L8I381|L8I381_9CETA	1	Syntaxin-5 OS=Bos taurus GN=STX5 PE=2 SV=1;Syntaxin-5 OS=Bos mutus GN=M91_07646 PE=4 SV=1	29	5	0.002	2	0.11	0	0.36	0.07	0.305556	0.13	0.01	0.39	0.05	ADTMQNIESTIVELGSIFQQLAHMVK+ADTMQNIESTIVELGSIFQQLAHMVKEQEETIQR+ASGDVAIDMMDSR+DLSNTFAKLEK+DLSNTFAKLEKLTILAK+EQEETIQR+QNGIQANKPALRAVR+QRSEFTLMAKR+RIGKDLSNTFAK+TENLKQQRSR
293	sp|Q08DI1|ETAA1_BOVIN	1	Ewing's tumor-associated antigen 1 homolog OS=Bos taurus GN=ETAA1 PE=2 SV=1	26.7	38	0.007	2	0.15	0.02	0.4	0.12	0.375	0.23	0	0.17	0.1	AMATEEGSLVFESGK+AMATEEGSLVFESGKR+DNVQMQLLCDTVPEIDK+IITNESVVTENLPSK+LEKSFNIVVNQDK+LSEYVFTK+MLQMDLLSSTFSSPNDPDGQNDIFWDQNSPMTK+NCPMLSPFNNSSVTGSISDTKIAQGLEK+NMEELDVIQEQDK+QGSQFMQSK+QPSKEEEEKNR+QTPRKAMATEEGSLVFESGK+QVNSSKSVLTGSSSLNVGSHHMSTEIAASK+SGMNKSVDVK+SGMNKSVDVKLR+TKLSCTKLK+VDSKTSESVLEINNSSKHGAK
294	sp|Q08DI8|PUS7_BOVIN tr|F1ML88|F1ML88_BOVIN tr|G3N0P5|G3N0P5_BOVIN tr|L8I9T4|L8I9T4_9CETA	1	Pseudouridylate synthase 7 homolog OS=Bos taurus GN=PUS7 PE=2 SV=1;Pseudouridylate synthase 7 homolog OS=Bos taurus GN=PUS7 PE=4 SV=2;Pseudouridylate synthase 7 homolog (Fragment) OS=Bos taurus GN=PUS7 PE=4 SV=1;Pseudouridylate synthase 7-like protein OS=Bos mutus GN=M91_01670 PE=4 SV=1	33.7	17	0.005	8	0.16	0.02	0.28	0.03	0.571429	0.2	0.03	0.33	0.02	DPAAALRKLPVK+DTMDAINLLSK+ERYSDFVVHEIGRDGR+ETSVAIEVIEDTKEK+EVLKMDTSIKNQTQLNTTWLR+GSVAIEDNDSVAPAEEAK+GSYCHFVLYK+IDEYGLKPVPGDLVLK+ITAQRLAHLNK+MDTSIKNQTQLNTTWLR+NIVSAFGIIPR+NIVSAFGIIPRNNR+RCVEGQLLR+SGAEKGYLVK+SLFPGLETKTEDR+VKPNIFSYMGTKDK+YIVAYHAAGKK+YRALKMDFSLPPSTYATMAIR
295	sp|Q08DK1|IGS11_BOVIN tr|G3N2T6|G3N2T6_BOVIN	1	Immunoglobulin superfamily member 11 OS=Bos taurus GN=IGSF11 PE=2 SV=1;Immunoglobulin superfamily member 11 OS=Bos taurus GN=IGSF11 PE=4 SV=1	9.6	7	0.002	3	0.18	0.01	0.24	0.04	0.75	0.22	0.04	0.34	0	IGAVPVMVPAQSR+LPPTATQDQVQGTVTIR+NTESFGHFGDLR
296	sp|Q08DK3|KLH20_BOVIN tr|L8ITM7|L8ITM7_9CETA	1	Kelch-like protein 20 OS=Bos taurus GN=KLHL20 PE=2 SV=3;Kelch-like protein 20 (Fragment) OS=Bos mutus GN=M91_17761 PE=4 SV=1	23.4	14	0.004	4	0.18	0.05	0.22	0.07	0.818182	0.26	0.04	0.28	0.02	DDTTELSSAER+ELCDVVLVVGAKK+FLVGTVGSDPLIK+HLGCAVYQDMIYAVGGR+LGGGVGVIK+LPEGVPQPARMPYISDK+QLDPSNCLGIR+QTEVVIR+QTLEVINLLR+QTLEVINLLRKHR+RKHLGCAVYQDMIYAVGGR+WHTIAPMGTRR+YNPRTNQWSPVVAMTSR+YNPRTNQWSPVVAMTSRR
297	sp|Q08DM7|SEPT3_BOVIN tr|L8HUR1|L8HUR1_9CETA	1	Neuronal-specific septin-3 OS=Bos taurus GN=SEPT3 PE=2 SV=3;Neuronal-specific septin-3 (Fragment) OS=Bos mutus GN=M91_14874 PE=3 SV=1	15.8	4	0.002	2	0.2	0.02	0.27	0.03	0.740741	0.24	0.01	0.27	0.04	ADTMTLEEK+DFVIRTHLQDLK+EYQVNGK+KTPWGIIEVENLNHCEFALLR+TENDKIR
298	sp|Q08DP6|RHG10_BOVIN	1	Rho GTPase-activating protein 10 OS=Bos taurus GN=ARHGAP10 PE=2 SV=1	16.3	10	0.002	0	-9	-9	-9	-9	1	-9	-9	-9	-9	AAKKFTMIPFEHR+ECIRRHTDSIDR+EPGWLEGTLNGKR+ERIRAHEAELER+IRAHEAELER+KDSHLQEADIQVEQNR+LLSMLMDVK+LPEKNKEMLDILVK+LSAAQRKFAHSLR+NLIAATKTLSAAQR+QWLEVLGGKEALFPSFNR
299	sp|Q08DQ0|PKP3_BOVIN	1	Plakophilin-3 OS=Bos taurus GN=PKP3 PE=2 SV=1	28	17	0.004	3	0.08	0.03	0.38	0.06	0.210526	0.21	0.04	0.29	0.07	DEMSTKLVSHLIEK+EQDDELR+GAEGPEAERLRAAR+GVAAGGPGGVLEPVTRAPSVR+HNGPAEPDGAAEAARGASR+KEDFLGP+LALVEENGIFELLRALR+LRAARVQEQVR+LSSGFDDIDLPSAVK+LYDEMPPSALQRLEGR+NLSRNAR+NLSSASQATRQK+NVTGILWNLSSSDHLK+RASSSSSR+RLSSVHNGGGAFGAAGYR+RWAGVLSR+VRTADHHQLRSLTGLIR
300	sp|Q08E08|SCN4B_BOVIN tr|M0QSG9|M0QSG9_9CETA tr|V6F7R8|V6F7R8_BOVIN	1	Sodium channel subunit beta-4 OS=Bos taurus GN=SCN4B PE=2 SV=1;Sodium channel subunit beta-4 OS=Bos mutus GN=M91_09744 PE=4 SV=1;Sodium channel subunit beta-4 OS=Bos taurus GN=SCN4B PE=4 SV=1	32.5	7	0.003	5	0.21	0.03	0.27	0.02	0.777778	0.21	0.02	0.3	0.02	DQGAARAR+ILIDGTVKNEK+ITLEGSTKEK+KECLVSSSGNDNTENGLPGSK+NEKSDPKVK+NLEFSDTGKYTCHVKNPK
301	sp|Q08E13|RNF10_BOVIN	1	RING finger protein 10 OS=Bos taurus GN=RNF10 PE=2 SV=1	21.2	16	0.006	11	0.16	0.02	0.32	0.02	0.5	0.17	0.01	0.32	0.02	AEFSPAQFSGPK+AEFSPAQFSGPKK+CPICYSSVHKKDLK+EYGSLEQSPEK+GGGSSKLFSSSFNGGR+IEMEENK+IEMEENKK+LDTPVTSDPLSEEKGGKK+MPPQRGGGSSKLFSSSFNGGR+MPQSSPSAAATASDMDKNSGSSSSSASSGSSKGQQPPR+NSGSSSSSASSGSSK+QYVVGDTITMQLMK+QYVVGDTITMQLMKR+REKGVLVALPK+RIEMEENKK+SDGKNSSGSKR+SVVATESRQYVVGDTITMQLMKR+TWSKCPICYSSVHKK
302	sp|Q08E27|STRBP_BOVIN tr|L8IS79|L8IS79_9CETA	1	Spermatid perinuclear RNA-binding protein OS=Bos taurus GN=STRBP PE=2 SV=1;Spermatid perinuclear RNA-binding protein (Fragment) OS=Bos mutus GN=M91_20642 PE=4 SV=1	18.2	13	0.004	7	0.2	0.05	0.2	0.05	1	0.23	0.04	0.25	0.06	ASAALAALEK+EDITHSAQHALR+EEAVDTYSKDQGGR+EGAGSSALK+GVVNTAVSAAVQAVR+GVVNTAVSAAVQAVRGR+KDGEKVAMK+KEEAVDTYSKDQGGR+KIIPQAKGVVNTAVSAAVQAVR+NPVMELNEKRR+TLCGVMR+TQGPILTASGK+VAKASAALAALEKLFSGPNAANNK
303	sp|Q08E39|SPY2_BOVIN tr|L8HZ36|L8HZ36_9CETA	1	Protein sprouty homolog 2 OS=Bos taurus GN=SPRY2 PE=2 SV=1;Protein sprouty-like protein 2 OS=Bos mutus GN=M91_16179 PE=4 SV=1	47	8	0.003	4	0.2	0.01	0.28	0.02	0.714286	0.2	0.02	0.31	0.01	AQSGSGSQPLLQAPRDSGR+DALPQQVHVLSLDQIRAIR+EDVGLHAYK+LLGSSFSSGPLADR+LLGSSFSSGPLADRIIRVQPK+NTNEYTEGPTVLPR+QPSRPQHPPAHPSAR+SISTVSSGSRSSTR+TSTSSSSSEQRLLGSSFSSGPLADR+VPTVPPRNFEKPT+VQPKSELKPGELKPLSK
304	sp|Q0II59|PDXK_BOVIN tr|L8HWN9|L8HWN9_9CETA	1	Pyridoxal kinase OS=Bos taurus GN=PDXK PE=2 SV=1;Pyridoxal kinase (Fragment) OS=Bos mutus GN=M91_12141 PE=4 SV=1	35.4	10	0.004	4	0.16	0.03	0.37	0.08	0.432432	0.14	0.06	0.26	0.02	AKSGEGVKPSPAQLELRMVQSK+APDGSMVTQR+APDGSMVTQRIR+APDGSMVTQRIRMEMHK+DIESPEIVVQATVL+GSDYLMALGSQR+GSDYLMALGSQRTRAPDGSMVTQR+QQNPRLVYVCDPVMGDQR+SGEGVKPSPAQLELR+TRAPDGSMVTQR+TRAPDGSMVTQRIR+TVSAMHHVLQR+VACEKTVSAMHHVLQR
305	sp|Q0II86|SNP29_BOVIN	1	Synaptosomal-associated protein 29 OS=Bos taurus GN=SNAP29 PE=2 SV=1	41.9	28	0.004	4	0.17	0.02	0.36	0.1	0.472222	0.2	0.02	0.18	0.08	AEATAASTGR+DLADGPGAPADRQQALR+DLADGPGAPADRQQALRQEVLR+EQEAQYQASHPNLR+IDSNLDELSVGLGR+IGVVSAEELVR+IGVVSAEELVRQR+MVDKMEQDLK+QEVLRRAEATAASTGR+QQALRQEVLR+SKPAETPSAQNGTLTPQPSGR+TEKMVDK
306	sp|Q0IIC2|KLD10_BOVIN tr|L8I2A3|L8I2A3_9CETA	1	Kelch domain-containing protein 10 OS=Bos taurus GN=KLHDC10 PE=2 SV=1;Kelch domain-containing protein 10 OS=Bos mutus GN=M91_00893 PE=4 SV=1	20.8	22	0.004	5	0.13	0.02	0.32	0.02	0.40625	0.21	0.04	0.31	0.03	ELWRYHFATGVWHQMGTDGYMPR+GGGAAGGGGGGSGAGGGSGGNGGR+GGGAAGGGGGGSGAGGGSGGNGGRGTGQLNR+IPNRFLRGHRPPPAR+LNLQTFQWVK+MSAAQGWDRNR+RGGGAAGGGGGGSGAGGGSGGNGGR+RGGGAAGGGGGGSGAGGGSGGNGGRGTGQLNR+RRGGGAAGGGGGGSGAGGGSGGNGGR
307	sp|Q0IIC4|ZMAT3_BOVIN tr|L8IT64|L8IT64_9CETA	1	Zinc finger matrin-type protein 3 OS=Bos taurus GN=ZMAT3 PE=2 SV=1;Zinc finger matrin-type protein 3 OS=Bos mutus GN=M91_09223 PE=4 SV=1	43.9	16	0.004	7	0.18	0.02	0.32	0.02	0.5625	0.19	0.01	0.3	0.01	KEGNEYKMMPNR+LRLAEAQSNSFSDSSEVGQRR+MSNAVEAVAAPAVSVPPQMGSFKPGGR+NEMENLGYV+NHAKRLR+NHGKKLR+NMYAVQNNSAGPYFNPRSR+NYYAANSCPPPAR+RNMYAVQNNSAGPYFNPRSR+RPSSSPPMSVAAR
308	sp|Q0IIG5|PFKAM_BOVIN tr|L8HYJ7|L8HYJ7_9CETA	1	ATP-dependent 6-phosphofructokinase, muscle type OS=Bos taurus GN=PFKM PE=2 SV=1;ATP-dependent 6-phosphofructokinase OS=Bos mutus GN=M91_21474 PE=3 SV=1	23.6	24	0.007	8	0.15	0.01	0.28	0.02	0.535714	0.22	0.03	0.32	0.02	DVTRAMDERR+EATWESVSMMLQLGGTVIGSAR+ESYRNGR+GQIEEAGWSYVGGWTGQGGSK+GQIEEAGWSYVGGWTGQGGSKLGTK+GSRLNIIIVAEGAIDK+IKQSAAGTKR+LNIIIVAEGAIDK+LSETRNRGSR+MGAKAMNWMSGK+NFATKMGAK+NFATKMGAKAMNWMSGK+NGKPITSEDIK+QSAAGTKR+SEWSDLLSDLQKSGK+SGKITAEEATK+SGSHTVAVMNVGAPAAGMNAAVR+SGSHTVAVMNVGAPAAGMNAAVRSTVR+TFVLEVMGR
309	sp|Q0IIK5|DDX1_BOVIN tr|A7E3W7|A7E3W7_BOVIN tr|L8IWN9|L8IWN9_9CETA	1	ATP-dependent RNA helicase DDX1 OS=Bos taurus GN=DDX1 PE=2 SV=1;DEAD (Asp-Glu-Ala-Asp) box polypeptide 1 OS=Bos taurus GN=DDX1 PE=2 SV=1;ATP-dependent RNA helicase DDX1 (Fragment) OS=Bos mutus GN=M91_00603 PE=4 SV=1	16.4	16	0.005	5	0.14	0.02	0.33	0.03	0.424242	0.16	0.04	0.33	0.04	ALIVEPSR+DQLSVLDNGVDIVVGTPGR+DQQEGKKGK+ELLIIGGVAAR+ELLIIGGVAARDQLSVLDNGVDIVVGTPGR+LDDLVSTGKLNLSQVR+LGKSHIRTDEVHAK+LQVIVCSATLHSFDVKK+MDQAIIFCRTK+NGKDLGLAFEIPPHMK
310	sp|Q0IIL1|MICU1_BOVIN	1	Calcium uptake protein 1, mitochondrial OS=Bos taurus GN=MICU1 PE=2 SV=1	34.9	19	0.005	5	0.28	0.03	0.24	0.01	1.16667	0.19	0.04	0.26	0.02	CAQETAWDFALPK+DMGFTRLMQAMWK+DRKVMEYENR+DRSTTGNTLK+EFVSIMKQR+HDPVDGRITERQFGGMLLAYSGVQSK+IFRYFATLK+LEFERHDPVDGR+LMRGLEKPK+LNSLSALAELAVGSR+MFRLNSLSALAELAVGSR+RLMMVAFLGASAVTASTGLLWKR+SQTSMGMRHR+VTMQQVARTVAK
311	sp|Q0P569|NUCB1_BOVIN tr|L8IJU8|L8IJU8_9CETA	1	Nucleobindin-1 OS=Bos taurus GN=NUCB1 PE=2 SV=1;Nucleobindin-1 OS=Bos mutus GN=M91_16014 PE=4 SV=1	26.4	11	0.004	4	0.16	0.04	0.28	0.02	0.571429	0.19	0.03	0.33	0.06	AALFLLPSLLLLR+EAELNAKAQRLSQETEALGR+EKLQAANAEDIKSGK+EMEEERLRMR+EVWEELDGLDPNR+KEFGDTGEGWEQGK+LQAANAEDIKSGK+LSQETEALGRSQGR+MPPSGPRAALFLLPSLLLLR+NEDDDMR+NEDDDMREMEEERLR+QEVSRLR+RYEMLKEHER+SQGRLEAQK
312	sp|Q0P591|MA6D1_BOVIN tr|L8HSF7|L8HSF7_9CETA	1	MAP6 domain-containing protein 1 OS=Bos taurus GN=MAP6D1 PE=2 SV=1;MAP6 domain-containing protein 1 OS=Bos mutus GN=M91_03623 PE=4 SV=1	32.8	9	0.003	6	0.18	0.04	0.27	0.03	0.666667	0.19	0.04	0.31	0.02	AGFQAPEVR+DATQGRGPGASSR+DFGVWTAPSGSRDATQGR+MAWPCISRLCCLAR+VITTHSSGWDGSPRAGFQAPEVRK
313	sp|Q0P5D1|CC153_BOVIN	1	Coiled-coil domain-containing protein 153 OS=Bos taurus GN=CCDC153 PE=2 SV=1	34.3	8	0.002	3	0.21	0.02	0.24	0.04	0.875	0.22	0.01	0.32	0.06	ASEDQLKQR+EAEAAQREAKQALGER+EQLELCQREAEAAQR+EVLQDCLALQR+IKDLEAELEGAR+NAGADVEAESMRR+RNAGADVEAESMRR
314	sp|Q0P5E7|GTPB8_BOVIN	1	GTP-binding protein 8 OS=Bos taurus GN=GTPBP8 PE=2 SV=1	26.4	18	0.004	7	0.17	0.03	0.27	0.03	0.62963	0.17	0.04	0.34	0.03	AESFFTASARNR+IEYLTSAVR+LDHAPDLHRPEVCFIGR+LFAMGPELGSGR+LNFYKVGKYFTLVDMPGYGYR+QSVGRLFAMGPELGSGR+YFTLVDMPGYGYR
315	sp|Q0P5F7|PI42C_BOVIN tr|G3X6D7|G3X6D7_BOVIN tr|L8I6H9|L8I6H9_9CETA	1	Phosphatidylinositol 5-phosphate 4-kinase type-2 gamma OS=Bos taurus GN=PIP4K2C PE=2 SV=1;Phosphatidylinositol 5-phosphate 4-kinase type-2 gamma (Fragment) OS=Bos taurus GN=PIP4K2C PE=4 SV=1;Phosphatidylinositol-5-phosphate 4-kinase type-2 gamma (Fragment) OS=Bos mutus GN=M91_11205 PE=4 SV=1	20.4	9	0.003	5	0.17	0.01	0.31	0.01	0.548387	0.19	0.03	0.31	0.01	ENLPSHFK+EYCPQVFR+GSEPEEDGPVR+GSLVSREASDK+IMDYSLLLGIHDIIR+TVKHGAGAEISTVHPEQYAKR
316	sp|Q0P5I5|HOGA1_BOVIN	1	4-hydroxy-2-oxoglutarate aldolase, mitochondrial OS=Bos taurus GN=HOGA1 PE=1 SV=1	25.7	5	0.002	2	0.16	0.02	0.38	0.05	0.421053	0.2	0.07	0.25	0.01	DSGGDVTR+IGLIVHKTR+LCLTGQWEDAQK+LEENLHKLGTLPFR+LEVVSRARQALPK+TMDWFGYYGGPCRSPLQELSPAQEEALR
317	sp|Q0P5I8|GET4_BOVIN tr|F1MQU5|F1MQU5_BOVIN	1	Golgi to ER traffic protein 4 homolog OS=Bos taurus GN=GET4 PE=2 SV=1;Golgi to ER traffic protein 4 homolog OS=Bos taurus GN=GET4 PE=4 SV=2	24.9	9	0.003	6	0.16	0.02	0.27	0.04	0.592593	0.17	0.02	0.36	0.04	ALKWSSGGSGK+ASVEKGDYYEAHQMYR+GGVQRVEGKLR+MAAAAMAEQESAR+TLFFRYMAQSK+VAFVSRALKWSSGGSGK
318	sp|Q0P5J0|QRIC1_BOVIN tr|L8HTM5|L8HTM5_9CETA	1	Glutamine-rich protein 1 OS=Bos taurus GN=QRICH1 PE=2 SV=2;Glutamine-rich protein 1 OS=Bos mutus GN=M91_16962 PE=4 SV=1	20.3	16	0.004	4	0.17	0.04	0.24	0.05	0.708333	0.22	0.03	0.33	0.02	ALGIHQTGQKVTDDMYAEQTENPENPLR+DAQNRLAPIGR+EKMVGTTSVVK+EQMGQMLTR+ILVIREIQEAIAVASASTMH+LEDDKEK+MNNSLENTISFEEYIRVKAR+NAELEKDAQNRLAPIGR+NPSNPKDK+QLGAHSPSTLLTTLMFFNTK+TVDQHMKLAFSKVLR+YFLLKTVDQHMK
319	sp|Q0P5J1|FACR2_BOVIN tr|L8IQ03|L8IQ03_9CETA	1	Fatty acyl-CoA reductase 2 OS=Bos taurus GN=FAR2 PE=2 SV=1;Fatty acyl-CoA reductase 2 OS=Bos mutus GN=M91_00453 PE=4 SV=1	17.5	7	0.002	3	0.16	0.05	0.33	0.01	0.484848	0.11	0.02	0.38	0.04	EVCPNVHEKIR+FLSYFRASSTLNV+KPRMTKLMNR+LLIARSQVAR+MTKLMNRLLR+NVWFFIVSFCYKFLSYFR+QGQTLQQRVFQILDSKLFEK+TLSMLEYFVNR
320	sp|Q0V7M1|KPSH1_BOVIN tr|L8IH27|L8IH27_9CETA	1	Serine/threonine-protein kinase H1 OS=Bos taurus GN=PSKH1 PE=2 SV=1;Serine/threonine-protein kinase H1 OS=Bos mutus GN=M91_18252 PE=4 SV=1	38	16	0.006	9	0.18	0.01	0.31	0.01	0.580645	0.19	0.02	0.29	0.03	CQSTKSAQSTRSSR+DATRVLQMVLDGVR+DLKPENLLYYHPGTDSK+GSFSRVVR+GSFTERDATR+GSFTERDATRVLQMVLDGVR+HPWVVSMAASSSMK+IIITDFGLASARK+NLHRSISQNLLK+QILRGKYSYSGEPWPSVSNLAK+VTAKYDIKALIGR+VYMVMELATGGELFDRIIAK+YRAKFDPR
321	sp|Q0V7M8|F167A_BOVIN tr|L8J5W5|L8J5W5_9CETA	1	Protein FAM167A OS=Bos taurus GN=FAM167A PE=2 SV=1;Protein FAM167A OS=Bos mutus GN=M91_07534 PE=4 SV=1	52.1	8	0.003	5	0.23	0.02	0.26	0.03	0.884615	0.17	0.02	0.3	0.05	DELSDLFCDAPLASSFSLSAPLKLIGVTK+GSGEEEPSLLR+IEQTCDLHR+LETRRPSYLEWQAR+LIGVTKMNINSR+LQDQQLAR+RMLNDATYELEER+SDIHKLKIEQTCDLHR+TRALRPHPPPNGR
322	sp|Q0V8C2|EXOC3_BOVIN tr|L8INM9|L8INM9_9CETA	1	Exocyst complex component 3 OS=Bos taurus GN=EXOC3 PE=2 SV=1;Exocyst complex component 3 (Fragment) OS=Bos mutus GN=M91_19560 PE=4 SV=1	18	14	0.005	4	0.19	0.01	0.3	0.03	0.633333	0.21	0.04	0.27	0.04	ASVEARLKAAIQSQLDGVR+DGAERMVR+DGLMYEQYR+EAEQLRFLFRK+EEAQLYRDEHLR+IEGTQADTRESDRMWLVR+KDGAERMVR+LKAAIQSQLDGVR+QLWMVLQRSLVTVR+QLWMVLQRSLVTVRR+QSINTIESLKDVK+QTGFVPPGRPKNWK+RDPTLLVSVVRIIER
323	sp|Q0V8R7|NSUN4_BOVIN tr|L8IQQ7|L8IQQ7_9CETA	1	5-methylcytosine rRNA methyltransferase NSUN4 OS=Bos taurus GN=NSUN4 PE=2 SV=2;Putative methyltransferase NSUN4 OS=Bos mutus GN=M91_21635 PE=4 SV=1	7.8	4	0.001	3	0.13	0.03	0.32	0.02	0.40625	0.19	0.02	0.35	0.01	MAALVVRGVR+NLAANDLSTSR+VSAELEQLK
324	sp|Q0VBZ8|PRR14_BOVIN tr|L8J1U7|L8J1U7_9CETA	1	Proline-rich protein 14 OS=Bos taurus GN=PRR14 PE=2 SV=1;Proline-rich protein 14 OS=Bos mutus GN=M91_10829 PE=4 SV=1	26.1	9	0.004	6	0.21	0.02	0.36	0.05	0.583333	0.17	0.05	0.19	0.05	HHSNHRDSVR+IAISEAGQPGASEGTVTVSPRPPIR+IRRPPSTPRR+LQPLGAPSPLEKASR+LQPLGAPSPLEKASRR+LSPWGLAPLFHSVR+MVPLEPQEESSTPR+NGTLIFTSSR+NGTLIFTSSRKLR+NYQSPTTRRTFETIFEEPR+RVLAVVLEDVMAAR+TLPPSLAPSPDVEPLLQQR
325	sp|Q0VC30|DPOG2_BOVIN tr|L8J1X9|L8J1X9_9CETA	1	DNA polymerase subunit gamma-2, mitochondrial OS=Bos taurus GN=POLG2 PE=2 SV=1;DNA polymerase subunit gamma-2, mitochondrial OS=Bos mutus GN=M91_08948 PE=4 SV=1	32	12	0.004	5	0.21	0.01	0.31	0.07	0.677419	0.19	0.04	0.22	0.05	CLLSGFGGQVDGR+DFLTKYISSAK+DLHRKVLK+DSLLNGCHPGLGPLGIELR+DTTMKEMMHISKVK+EPGPSLPVDNGFR+EQLVAFLENLLNTSGK+FAMSPSNFSSGDCQDEAGR+ICRCLLSGFGGQVDGR+ICRCLLSGFGGQVDGRQPEQLSK+KNVVPSVLSINGDLDR+LHPCLAPIKAALDVGR+NVVPSVLSINGDLDR+VLKLHPCLAPIKAALDVGR
326	sp|Q0VC50|RT4I1_BOVIN tr|L8IDR6|L8IDR6_9CETA	1	Reticulon-4-interacting protein 1, mitochondrial OS=Bos taurus GN=RTN4IP1 PE=2 SV=1;Reticulon-4-interacting protein 1, mitochondrial OS=Bos mutus GN=M91_21189 PE=4 SV=1	20.7	15	0.004	5	0.2	0.06	0.3	0.04	0.666667	0.18	0.02	0.26	0.03	DPLHVKIKGEEFPLTLGR+DVSGVVMECGLDVR+GEEFPLTLGR+IKGEEFPLTLGR+ISTTSPRSTVMPAWVIDK+KISTTSPRSTVMPAWVIDK+NACTAVCFWR+SGNVEAQLK+SGYGATALNMK+SGYGATALNMKR
327	sp|Q0VC66|CTU1_BOVIN tr|E1BII1|E1BII1_BOVIN	1	Cytoplasmic tRNA 2-thiolation protein 1 OS=Bos taurus GN=CTU1 PE=2 SV=1;Cytoplasmic tRNA 2-thiolation protein 1 OS=Bos taurus GN=LOC100297056 PE=3 SV=1	30.3	8	0.002	3	0.16	0.01	0.25	0.08	0.64	0.24	0.06	0.3	0.05	ACCTFCGVLRR+ALCQACALLDGLNR+DAALAAVRR+DAALAAVRRQAAR+GGGLGSPGEGGALPR+LLPPGAVVAVGASGGK+MLEAARPSAVLDLVHSAER+MPAPQCASCHKAR+MPAPQCASCHKARAALR
328	sp|Q0VC84|C1GLT_BOVIN tr|L8HNP0|L8HNP0_9CETA	1	Glycoprotein-N-acetylgalactosamine 3-beta-galactosyltransferase 1 OS=Bos taurus GN=C1GALT1 PE=2 SV=1;Glycoprotein-N-acetylgalactosamine 3-beta-galactosyltransferase 1 OS=Bos mutus GN=M91_04475 PE=4 SV=1	21.7	8	0.003	4	0.19	0.01	0.38	0.05	0.5	0.19	0.04	0.21	0.04	CMEIINVEAGDSR+CTHSSSIEDLALGR+DFPAVGLKTR+DIQPSILHNDPHAR+NEDTNVNQEPLKEK+TDKCTHSSSIEDLALGR+YNPEEPIYFGRR
329	sp|Q0VCC5|REPI1_BOVIN	1	Replication initiator 1 OS=Bos taurus GN=REPIN1 PE=2 SV=1	22	21	0.004	4	0.18	0.02	0.37	0.04	0.486486	0.13	0.03	0.29	0.04	GTAAAQSGGQALGR+GTAAAQSGGQALGRAHR+LPRPCPECGR+LPRPCPECGRRFR+RCHPPAPEARPFICGNCGR+RIHTGERPYACPDCDRSFSQK+RPIACPACER+SEGSAQGGPQPPASAPER+SRGTAAAQSGGQALGR+THLVAHSRVHSGERPFACEECGR
330	sp|Q0VCH4|G3ST3_BOVIN	1	Galactose-3-O-sulfotransferase 3 OS=Bos taurus GN=GAL3ST3 PE=2 SV=1	24.8	9	0.004	7	0.14	0.02	0.28	0.03	0.5	0.16	0.04	0.36	0.04	ACVEREARELR+AGPATEACLK+DDDAYLAGLIR+ILLLVLGCSTLSLLIHQGAQLSWYPK+KVDIMGYDLPSGR+LAMPEVQYSSYLLR+LNARAASSR+TAGTTVQNILFR+VDIMGYDLPSGR
331	sp|Q0VCI1|OSGEP_BOVIN tr|L8I716|L8I716_9CETA	1	Probable tRNA N6-adenosine threonylcarbamoyltransferase OS=Bos taurus GN=OSGEP PE=2 SV=1;Putative O-sialoglycoprotein endopeptidase OS=Bos mutus GN=M91_09640 PE=4 SV=1	36.4	6	0.002	3	0.24	0.07	0.25	0.07	0.96	0.24	0.09	0.18	0.05	DGKVLANPR+FCIDNGAMIAQAGWEMFQAGHRTPLSESGITQR+ISNDPSPGYNIEQMAKRGK+KLVELPYTVKGMDVSFSGILSFIEDVAQR+LQEMMETMCQER+LQEMMETMCQERGAR+TYVTPPGTGFLPGDTAR
332	sp|Q0VCM4|PYGL_BOVIN	1	Glycogen phosphorylase, liver form OS=Bos taurus GN=PYGL PE=2 SV=1	36.8	28	0.01	10	0.18	0.02	0.29	0.02	0.62069	0.21	0.02	0.29	0.02	ARPEFMLPVHFYGR+AWNIMVLKNIAASGK+DGWQIEEADDWLR+DIWNMEPSDIK+DLVNMLFYHDR+EISNVKQENKLK+EYARDIWNMEPSDIK+FQNKTNGITPR+FSSDRTIK+HLHFTLVKDR+IEDVAALDKKGYEAK+IGEDYVKDLSQLTK+INMAHLCIVGSHAVNGVAK+INPSSMFDVQVK+INPSSMFDVQVKR+IRDGWQIEEADDWLR+LAACFLDSMATLGLAAYGYGIR+LAIDQIDKGFFSPKQPDLFK+LFVPRTVIIGGK+LKLIFLENYR+LKQEYFVVAATLQDVIR+LNSFLGDDIFLR+LNSFLGDDIFLREISNVK+MSLIEEEGGK+NIAASGKFSSDRTIK+QLLNCLHVVTMYNR+QPDLFKDLVNMLFYH…
333	sp|Q0VCP1|KAD4_BOVIN	1	Adenylate kinase 4, mitochondrial OS=Bos taurus GN=AK4 PE=2 SV=1	13.9	2	0.001	1	0.04	99.99	0.43	99.99	0.0930233	0.25	99.99	0.28	99.99	DVAKPVIELYKSR+LLRAVILGPPGSGK+MASKLLRAVILGPPGSGK
334	sp|Q0VCP3|OLFL3_BOVIN tr|L8J1E8|L8J1E8_9CETA	1	Olfactomedin-like protein 3 OS=Bos taurus GN=OLFML3 PE=2 SV=1;Olfactomedin-like protein 3 OS=Bos mutus GN=M91_03162 PE=4 SV=1	23.6	7	0.002	3	0.23	0.03	0.26	0.03	0.884615	0.21	0.02	0.29	0.02	ARIQCSFDASGTLTPERAALPYFPR+DFTLAMAARK+DFTLAMAARKASR+EALRTEADTISGR+LAALEER+LRDFTLAMAAR+NEKYDMITDCGYTISQVRSMK+RYGAHASLR+SMKILKR+YDMITDCGYTISQVR
335	sp|Q0VCR8|EX3L1_BOVIN tr|F1MBI4|F1MBI4_BOVIN	1	Exocyst complex component 3-like protein OS=Bos taurus GN=EXOC3L1 PE=2 SV=1;Exocyst complex component 3-like protein OS=Bos taurus GN=EXOC3L1 PE=4 SV=2	14.2	6	0.002	1	0.13	99.99	0.32	99.99	0.40625	0.23	99.99	0.32	99.99	EQRLAALSSLR+LAALSSLR+LAALSSLRAGPQPSPQAGR+LRAVPAAVAHTQTLIDAQR+LVLEALLAELQPLFAALPSRR+QLQALSQLLPR+QQFPDVSEDHVSALLDLR+TVVLQYLSALMQGR
336	sp|Q0VCW4|SDHL_BOVIN tr|F1N0R8|F1N0R8_BOVIN tr|L8I028|L8I028_9CETA	1	L-serine dehydratase/L-threonine deaminase OS=Bos taurus GN=SDS PE=2 SV=1;L-serine dehydratase/L-threonine deaminase OS=Bos taurus GN=SDS PE=1 SV=1;L-serine dehydratase/L-threonine deaminase OS=Bos mutus GN=M91_10544 PE=4 SV=1	25.7	8	0.002	1	0.18	99.99	0.3	99.99	0.6	0.18	99.99	0.34	99.99	AGKLVTLPCITSVAK+ALGVTTVAAQAMK+GCEHFVCSSAGNAGMAAAYAARK+LDSAQPSGSFKIR+LKNEGATVKVVGETLDEAIR+LVTLPCITSVAK+NEGATVKVVGETLDEAIR
337	sp|Q0VCW8|PDCL3_BOVIN tr|F1MTW8|F1MTW8_BOVIN tr|L8ICC8|L8ICC8_9CETA	1	Phosducin-like protein 3 OS=Bos taurus GN=PDCL3 PE=2 SV=1;Phosducin-like protein 3 OS=Bos taurus GN=PDCL3 PE=4 SV=1;Phosducin-like protein 3 (Fragment) OS=Bos mutus GN=M91_20461 PE=4 SV=1	29.4	7	0.002	2	0.19	0.01	0.32	0.05	0.59375	0.1	0.01	0.38	0.03	AQFIGPLVFGGMNLTLDELEWK+DLEKEAEEEEQRILQQSIVK+DYVQEVTK+FGEVLEISGK+LSESGAIK+NKFGEVLEISGK
338	sp|Q0VCX4|CTNB1_BOVIN tr|L8IT83|L8IT83_9CETA	1	Catenin beta-1 OS=Bos taurus GN=CTNNB1 PE=1 SV=1;Catenin beta-1 (Fragment) OS=Bos mutus GN=M91_15433 PE=4 SV=1	19.6	15	0.007	10	0.19	0.01	0.29	0.02	0.655172	0.17	0.02	0.32	0.02	EDITEPAICALR+HAVVNLINYQDDAELATR+LAGGLQKMVALLNK+LIILASGGPQALVNIMR+LSVELTSSLFR+NEGVATYAAAVLFR+NKMMVCQVGGIEALVR+NLALCPANHAPLR+TMQNTNDVETAR+TNVKFLAITTDCLQILAYGNQESK
339	sp|Q0X0E2|HEXI2_BOVIN tr|F1MGX5|F1MGX5_BOVIN tr|L8IJ84|L8IJ84_9CETA	1	Protein HEXIM2 OS=Bos taurus GN=HEXIM2 PE=2 SV=2;Protein HEXIM2 OS=Bos taurus GN=HEXIM2 PE=4 SV=1;Protein HEXIM2 OS=Bos mutus GN=M91_10292 PE=4 SV=1	38.3	23	0.006	8	0.17	0.01	0.29	0.03	0.586207	0.17	0.02	0.34	0.02	DERQSQRASR+ISGTCGSPR+LRQENEMWNREGGR+LSQAEEEMRRLR+QENEMWNR+QENEMWNREGGR+QENEMWNREGGRR+RHWRPYLELSWAEK+RHWRPYLELSWAEKQQR+SKEELVR+TQSLGACSAEAMLAR+TSPEPHDPGGSQPLTPR+VREEMFAK
340	sp|Q10568|CPSF2_BOVIN tr|L8HPA9|L8HPA9_9CETA	1	Cleavage and polyadenylation specificity factor subunit 2 OS=Bos taurus GN=CPSF2 PE=1 SV=1;Cleavage and polyadenylation specificity factor subunit 2 OS=Bos mutus GN=M91_17677 PE=4 SV=1	18.3	16	0.004	2	0.12	0.05	0.35	0.11	0.342857	0.18	0.07	0.31	0.01	DAELAWIDGVLDMR+DGEEEIVYAVDFNHK+DLFIQWCQDPK+DSLVSSLQFCKAK+EGIQAEFVGGVLVCNNQVAVRRTETGR+GDGNVLIAVDTAGR+HDLMMKGEGSR+IINQMKPR+SDGDSIKKIINQMKPR+VYMPKLHETVDATSETHIYQVR
341	sp|Q10741|ADA10_BOVIN tr|L8IX70|L8IX70_9CETA	1	Disintegrin and metalloproteinase domain-containing protein 10 OS=Bos taurus GN=ADAM10 PE=1 SV=1;Disintegrin and metalloproteinase domain-containing protein 10 (Fragment) OS=Bos mutus GN=M91_14882 PE=4 SV=1	13.7	17	0.004	6	0.14	0.02	0.33	0.02	0.424242	0.18	0.02	0.33	0.02	DDKELCHVCCMKK+IRINTTADEK+LNNNKFSLCSIR+LPPPKPLPGTLKR+LPPPKPLPGTLKRR+LVDADGPLAR+NISFMVKR+NISFMVKRIR+NISQVLEKKR+RAVSHEDQFLR+TEKCRDDSDCAK
342	sp|Q148G5|PROD_BOVIN tr|G3N3Y2|G3N3Y2_BOVIN tr|L8I3Y7|L8I3Y7_9CETA	1	Proline dehydrogenase 1, mitochondrial OS=Bos taurus GN=PRODH PE=2 SV=1;Proline dehydrogenase 1, mitochondrial OS=Bos taurus GN=PRODH PE=4 SV=1;Proline dehydrogenase, mitochondrial (Fragment) OS=Bos mutus GN=M91_03686 PE=4 SV=1	26.1	10	0.003	3	0.14	0.02	0.37	0.06	0.378378	0.15	0.06	0.27	0.09	AAVMVASHNEDTVRFTLR+DGCGVSKREK+DGVTSARTYFYASEAK+FNVERPLIFNTFQCYLR+HLVVPNMQTGR+LEPLLSQFTEEEERQMTR+LEVAALQESVVK+LTLEMQR+QMTRMLQRMDVLAK+REKQFQAHR+SRRSWELAR+TELSRHLVVPNMQTGR
343	sp|Q148G8|UQCC3_BOVIN	1	Ubiquinol-cytochrome-c reductase complex assembly factor 3 OS=Bos taurus GN=UQCC3 PE=3 SV=1	62.1	66	0.014	22	0.14	0.01	0.33	0.01	0.424242	0.16	0.01	0.34	0.01	KLLLVGALLGAGAGVGTALFALVTPGEER+KNWMSGGGGGGGGGGR+NWMSGGGGGGGGGGR+QAMLKEMPEQYPQR
344	sp|Q148I1|PAAF1_BOVIN tr|L8IS09|L8IS09_9CETA tr|Q1JP70|Q1JP70_BOVIN	1	Proteasomal ATPase-associated factor 1 OS=Bos taurus GN=PAAF1 PE=2 SV=1;Proteasomal ATPase-associated factor 1 (Fragment) OS=Bos mutus GN=M91_07336 PE=4 SV=1;Proteasomal ATPase-associated factor 1 (Fragment) OS=Bos taurus GN=WDR71 PE=2 SV=1	20.4	10	0.002	3	0.19	0.07	0.35	0.03	0.542857	0.14	0.03	0.29	0.04	DGTARLWDCGR+EVGTESKMLLLAR+GGILDTAIVDR+GHKGGILDTAIVDRGK+KSIHVSCPK+NPRTPVQVIHR+NVVSGSRDGTAR+SGAPVMSLLSFR
345	sp|Q148K5|PX11B_BOVIN tr|L8IDV0|L8IDV0_9CETA	1	Peroxisomal membrane protein 11B OS=Bos taurus GN=PEX11B PE=2 SV=1;Peroxisomal membrane protein 11B OS=Bos mutus GN=M91_04794 PE=4 SV=1	39.5	6	0.003	3	0.28	0.04	0.27	0.05	1.03704	0.2	0.05	0.22	0.03	HGASPELQK+LLMEQESSACSR+LLMEQESSACSRR+LRVLLLARVLR+MDAWVRFSAQSQAR+QLEGHLSLGR+QLEGHLSLGRK+RAVHLSDVVLR+SGLAPRVDQEKWAQR+YYLFSLIMNLSRDAYEIR
346	sp|Q148M6|MXRA8_BOVIN	1	Matrix-remodeling-associated protein 8 OS=Bos taurus GN=MXRA8 PE=2 SV=1	35.6	9	0.003	2	0.2	0.04	0.24	0.02	0.833333	0.13	0.09	0.38	0.15	AGGPARRLVDMYSTGEQR+CQSPRMVWTQDRLHDR+DINMAEFAVASGDQSLYR+DRGRLLLPPSAFHDGNFSLFIR+DSPGNGSSHSGAPGPGAR+EVLAVERGAPALLTCVNR+LGEQRVGEQR+LHDRQRVVHWDLSGSK+LVDMYSTGEQR+NIDLDKEFR+RAYGPPFLR+SVVSESTVSWAAGAR
347	sp|Q17Q97|CS060_BOVIN tr|F1MFT3|F1MFT3_BOVIN tr|L8IEC9|L8IEC9_9CETA	1	Uncharacterized protein C19orf60 homolog OS=Bos taurus PE=2 SV=1;Uncharacterized protein OS=Bos taurus GN=C19orf60 PE=4 SV=1;Uncharacterized protein OS=Bos mutus GN=M91_10177 PE=4 SV=1	28.9	4	0.002	3	0.2	0.03	0.26	0.04	0.769231	0.12	0.01	0.4	0.02	EVLAVEAELAGPR+IHQLQAER+IHQLQAERAQAFR+QYLSSGPPYDFPR+TMEAISEVLQDLR
348	sp|Q17QG2|NUDC_BOVIN tr|L8IME5|L8IME5_9CETA	1	Nuclear migration protein nudC OS=Bos taurus GN=NUDC PE=2 SV=1;Nuclear migration protein nudC (Fragment) OS=Bos mutus GN=M91_13419 PE=4 SV=1	32.5	16	0.004	7	0.19	0.01	0.29	0.02	0.655172	0.16	0.03	0.33	0.02	DVVVDIQR+DVVVDIQRR+EAKSETSGPQIK+EKAERAAR+INKMEWWSR+INKMEWWSRLVSSDPEINTK+INPENSKLSDLDSETR+KDAENQEAQLKNGSLGSPGK+KINPENSK+LSDLDSETR+LSDLDSETRSMVEK+LSDLDSETRSMVEKMMYDQR+NGSLGSPGK+SMGLPTSDEQK+SMVEKMMYDQR
349	sp|Q17QH9|IQCD_BOVIN tr|L8I0V3|L8I0V3_9CETA	1	IQ domain-containing protein D OS=Bos taurus GN=IQCD PE=2 SV=1;IQ domain-containing protein D OS=Bos mutus GN=M91_10537 PE=4 SV=1	22.3	6	0.002	5	0.17	0.02	0.36	0.05	0.472222	0.15	0.02	0.28	0.03	DTEQALRKK+LEDEQEMVR+LEDEQEMVRMVR+LIAQTTKKSTIPPK+NRRHQEIIDTLENELAACVR+SKLTTIETKR+SQLPPLMQEIKESTKNVVR+TSEGMLGPDIAKAVR
350	sp|Q17QJ1|ACSF2_BOVIN tr|G1K208|G1K208_BOVIN tr|L8IUN9|L8IUN9_9CETA	1	Acyl-CoA synthetase family member 2, mitochondrial OS=Bos taurus GN=ACSF2 PE=2 SV=1;Acyl-CoA synthetase family member 2, mitochondrial OS=Bos taurus GN=ACSF2 PE=4 SV=2;Acyl-CoA synthetase family member 2, mitochondrial OS=Bos mutus GN=M91_15593 PE=4 SV=1	22	14	0.005	5	0.19	0.02	0.26	0.02	0.730769	0.2	0.03	0.32	0.02	EEVDKAASGLLSIGLRK+GGVIAGSPAPPELIRAIINKLNMK+KTLEAISRER+LCARSPRVLGAR+LHQKTPEESR+MAVYVGMLRVAR+MAVYVGMLRVARLCAR+TEEAIGQDK+TGDIAMMDEQGFCKIVGR+TVGRCLDATAQR+VGLSRVWQEAR+VLGARVGLSRVWQEAR
351	sp|Q17QN2|TOE1_BOVIN tr|L8ILN7|L8ILN7_9CETA	1	Target of EGR1 protein 1 OS=Bos taurus GN=TOE1 PE=2 SV=1;Target of EGR1 protein 1 OS=Bos mutus GN=M91_21617 PE=4 SV=1	11.3	5	0.002	4	0.15	0.02	0.27	0.05	0.555556	0.22	0.06	0.3	0.04	ALLGLPGKQPSR+CLLNQCIEER+QPSREAEDSPPTKQVCK+QSVRTLFLELIR+QVCKDNR+YKAVCHAAR
352	sp|Q17QV2|MON1A_BOVIN	1	Vacuolar fusion protein MON1 homolog A OS=Bos taurus GN=MON1A PE=2 SV=1	44.3	12	0.004	3	0.25	0.03	0.24	0.01	1.04167	0.29	0.04	0.2	0.06	AESPTPGLAQGMEPGAGQEGAMFVHAR+ARSLVFSILLAR+ASAVSAIHKLMR+DGAGEGDEEEAAEAWR+DGAGEGDEEEAAEAWRR+DLQEEMLPGSSEDWPESPGAAR+DPSFLMGAAR+DPSFLMGAARCLPLAAAVR+DVVSASLQQARAR+EDFFAVSDCRR+ITDNLLQLMAR+LLGLYQYLHSR+LLSGSERITDNLLQLMAR+RHQKHVFVLSEAGKPVYSR+RPATEPPR+RSPLVLVAVAR+SKSSGLFTSPEIEAPYDSEEEQER+SPLVLVAVAR+YGSEEALSSTMGVMVALVSFLEADK
353	sp|Q17QX2|ZGPAT_BOVIN tr|L8HNZ3|L8HNZ3_9CETA	1	Zinc finger CCCH-type with G patch domain-containing protein OS=Bos taurus GN=ZGPAT PE=2 SV=1;Zinc finger CCCH-type with G patch domain-containing protein OS=Bos mutus GN=M91_04664 PE=4 SV=1	21.8	14	0.004	6	0.17	0.02	0.35	0.03	0.485714	0.17	0.03	0.28	0.03	ALSLRLLQTEEKIEQTQR+CRSRGSGPGGRPPPR+GGAPGAPEVGAAPPGR+LAGAQQQLGQLR+LKGGAPGAPEVGAAPPGR+LKGGAPGAPEVGAAPPGRSGK+MGYEFGKGLGR+NAGRHSVTTAQLQEK+SGKEVYHASR+TRAGQAGVSKPPKCR
354	sp|Q1ECT8|CSMT1_BOVIN tr|M5FK53|M5FK53_BOVIN	1	Protein CCSMST1 OS=Bos taurus GN=CCSMST1 PE=2 SV=1;Protein CCSMST1 OS=Bos taurus GN=CCSMST1 PE=4 SV=1	37	6	0.002	3	0.17	0.02	0.28	0.02	0.607143	0.18	0.07	0.34	0.07	ARAQLAAEGDEEDDPHLPLR+MSGVLSAPAAGALR+MSGVLSAPAAGALRALR+WASRSPPPPPSGRAR
355	sp|Q1JP79|ARC1A_BOVIN	1	Actin-related protein 2/3 complex subunit 1A OS=Bos taurus GN=ARPC1A PE=2 SV=1	21.9	17	0.004	6	0.16	0.01	0.31	0.01	0.516129	0.19	0.02	0.33	0.02	DGVWKPTLVILRINR+EHNGHITGIDWAPKSDR+EVDEKPASTPWGSK+NMDKRATTEDR+NMSAMER+NMSAMERFR+NMSAMERFRNMDK+QSIQRNMSAMER+QSIQRNMSAMERFR+TLESSIQGLR
356	sp|Q1JPJ2|XPP1_BOVIN tr|L8IL42|L8IL42_9CETA	1	Xaa-Pro aminopeptidase 1 OS=Bos taurus GN=XPNPEP1 PE=2 SV=1;Xaa-Pro aminopeptidase 1 (Fragment) OS=Bos mutus GN=M91_12175 PE=3 SV=1	25.7	12	0.004	4	0.16	0.03	0.39	0.03	0.410256	0.15	0.01	0.28	0.02	ELQKQGRQEALEWLIR+EVPKGGVTEISAANKAEEFR+GHIAVSAAVFPTGTKGHLLDSFAR+ILCASLSPR+ILCASLSPREK+LKMAERNVVWFVVTALDEIAWLFNLR+MAKVLRSAGHHLIPVK+MAPKITSELLRQLR+NSAESEGMR+QEALEWLIRETQPISKQP+VGVDPLIIPTDYWKK+VGVDPLIIPTDYWKKMAK
357	sp|Q1JQA2|SMAD1_BOVIN tr|F1MD43|F1MD43_BOVIN tr|L8HZJ1|L8HZJ1_9CETA tr|L8ITC0|L8ITC0_9CETA tr|Q1LZG1|Q1LZG1_BOVIN	1	Mothers against decapentaplegic homolog 1 OS=Bos taurus GN=SMAD1 PE=2 SV=1;Mothers against decapentaplegic homolog OS=Bos taurus GN=SMAD5 PE=3 SV=2;Mothers against decapentaplegic homolog (Fragment) OS=Bos mutus GN=M91_06511 PE=3 SV=1;Mothers against decapentaplegic homolog (Fragment) OS=Bos mutus GN=M91_11393 PE=3 SV=1;Mothers against decapentaplegic homolog OS=Bos taurus GN=MGC139219 PE=2 SV=1	14.9	7	0.002	2	0.18	0.05	0.35	0.04	0.514286	0.15	0.03	0.3	0.06	AVDALVKKLK+KGAMEELEK+KKGAMEELEK+NSTIENTRR+QGDEEEKWAEK+RVESPVLPPVLVPR+WAEKAVDALVKK
358	sp|Q1JQD9|LMBL2_BOVIN tr|L8HR44|L8HR44_9CETA	1	Lethal(3)malignant brain tumor-like protein 2 OS=Bos taurus GN=L3MBTL2 PE=2 SV=1;Lethal(3)malignant brain tumor-like protein 2 OS=Bos mutus GN=M91_08481 PE=4 SV=1	14.4	21	0.004	3	0.15	0.03	0.36	0.02	0.416667	0.16	0.03	0.31	0.02	ALLEEDLQAAAKAPSEPAPDEIITVR+EAFFSKTKR+GMKVEVLNSDAVLPSR+QGSKKALLEEDLQAAAK+SQVSRTRMAVVDTVIGGR+TKRFCSVSCSR+TLPVDFHIKMVESMK+TRMAVVDTVIGGR+TRPLRQGSK
359	sp|Q1LZE9|PRS23_BOVIN	1	Serine protease 23 OS=Bos taurus GN=PRSS23 PE=2 SV=1	17.6	16	0.004	5	0.19	0.02	0.29	0.02	0.655172	0.18	0.02	0.32	0.02	DGRGANDSHSALPEK+FMKIGVSPPAKQLPGGR+HVLTAAHCIHDGK+IGVSPPAKQLPGGR+SGEEQSSGK+SGEEQSSGKSR+TYVKGTQKLR
360	sp|Q1LZG6|CCNB1_BOVIN tr|L8IX45|L8IX45_9CETA	1	G2/mitotic-specific cyclin-B1 OS=Bos taurus GN=CCNB1 PE=2 SV=1;G2/mitotic-specific cyclin-B1 (Fragment) OS=Bos mutus GN=M91_09437 PE=3 SV=1	23.8	14	0.004	6	0.18	0.01	0.3	0.04	0.6	0.19	0.03	0.3	0.01	AKISMAGAK+DIYAYLRQLEEEQAVKPKYLMGR+EAKTLASGK+FQIRQMEMKILR+ISAENKAKISMAGAK+ISMAGAKR+ISMAGAKRVPVAAVATSKPGLRPR+KEAKTLASGK+KMLQLVGVTAMFVASK+NVVMVNR+QMEMKILR
361	sp|Q1LZH0|U1SBP_BOVIN tr|L8I061|L8I061_9CETA	1	U11/U12 small nuclear ribonucleoprotein 35 kDa protein OS=Bos taurus GN=SNRNP35 PE=2 SV=1;U11/U12 small nuclear ribonucleoprotein 35 kDa protein (Fragment) OS=Bos mutus GN=M91_19030 PE=4 SV=1	33.5	7	0.002	1	0.04	99.99	0.34	99.99	0.117647	0.22	99.99	0.4	99.99	AMLARYTPNKGVTGDPLLTLFVAR+EEKLKEVFSR+KPINLPVVKNDQFREGK+LGGGLGGKKESGQLR+LNLQTKEEKLK+NDQFREGKR+TKEEKIK+TLKGWIPRR
362	sp|Q1LZH7|KANK2_BOVIN tr|F1N7N7|F1N7N7_BOVIN	1	KN motif and ankyrin repeat domain-containing protein 2 OS=Bos taurus GN=KANK2 PE=2 SV=1;KN motif and ankyrin repeat domain-containing protein 2 (Fragment) OS=Bos taurus GN=KANK2 PE=4 SV=2	31.8	23	0.005	4	0.17	0.03	0.24	0.03	0.708333	0.25	0.07	0.3	0.04	AGYSPIMLTALATLK+AQSLEPYGAGLR+ASQAGQTALMLAVSHGR+DEIRMELSPDLISACLALEK+DLGMPDGEAALAAK+EEPTDPEAHRR+ERDLGMPDGEAALAAK+EVEVAASTAAGAPAQR+LACRSDAHPELVR+LACRSDAHPELVRR+LIPVLQVKLSVLQEEKR+NTGQVPAHDDTTIK+QADLPPQAWPPPDSPVR+QADLPPQAWPPPDSPVRVDTVR+SDAHPELVRRHLVTFR+SLQFVGVNGSISPR+SQKFLGHPAGARGR+TQDDIQTILQLFR
363	sp|Q1RMH9|DNJC2_BOVIN tr|L8INR2|L8INR2_9CETA	1	DnaJ homolog subfamily C member 2 OS=Bos taurus GN=DNAJC2 PE=2 SV=1;DnaJ-like protein subfamily C member 2 OS=Bos mutus GN=M91_11964 PE=4 SV=1	21.6	22	0.005	6	0.2	0.02	0.28	0.02	0.714286	0.23	0.02	0.28	0.02	AALEKQIEEINEQIR+EEEEVRQQALLAK+IAEAVPGR+KAAQEQVLNASRGK+KEQEAKEK+LDPHQKDDINK+NAEKSAGGGGNGSK+NASASFQELEDKK+NSRWSNK+QASKNAEKSAGGGGNGSK+SEAKDNFFEVFSPVFERNSR+TAKDVIGKAK
364	sp|Q1RMS8|FBX25_BOVIN tr|L8I7V3|L8I7V3_9CETA	1	F-box only protein 25 OS=Bos taurus GN=FBXO25 PE=2 SV=1;F-box only protein 25 OS=Bos mutus GN=M91_02715 PE=4 SV=1	14.6	9	0.002	3	0.15	0.02	0.37	0.03	0.405405	0.16	0.03	0.32	0.03	DLLQDLSSTLCILIR+DLLQDLSSTLCILIRGVGK+HGYCTLGEAFNR+LDFSSAIQDIR+LDFSSAIQDIRRFNYVVR+LIKDLLQDLSSTLCILIR
365	sp|Q1RMT7|RIOK3_BOVIN tr|L8ID50|L8ID50_9CETA	1	Serine/threonine-protein kinase RIO3 OS=Bos taurus GN=RIOK3 PE=2 SV=1;Serine/threonine-protein kinase RIO3 OS=Bos mutus GN=M91_00538 PE=4 SV=1	11.9	12	0.003	3	0.32	0.04	0.25	0.04	1.28	0.11	0.07	0.28	0.04	DITTKHDEVVCGR+EHSTAEKAVDPK+EHSTAEKAVDPKTR+EMHNLTR+LSSEEMK+TTLNEFKNR+VIPTECAIKVFK
366	sp|Q1RMU2|CYLD_BOVIN	1	Ubiquitin carboxyl-terminal hydrolase CYLD OS=Bos taurus GN=CYLD PE=2 SV=1	14.8	6	0.002	3	0.16	0.03	0.33	0.04	0.484848	0.17	0.02	0.33	0.01	DVVEINEKFTELLLAITNCEERFSLFK+EKNDVEYYSETQELLR+FASLQPVSNQIER+GLQIDVGCPVKVQLR+GSIGQNIQDR+GTRYFTCALKK+ICGGLAMYECR+LNHKYNPVSLPK+NDVEYYSETQELLR+QTQKLLKVPK+TVSGIFFGVELLEEGR
367	sp|Q1RMU5|RBM5_BOVIN tr|L8ISD7|L8ISD7_9CETA	1	RNA-binding protein 5 OS=Bos taurus GN=RBM5 PE=2 SV=1;RNA-binding protein 5 (Fragment) OS=Bos mutus GN=M91_12460 PE=4 SV=1	25.5	18	0.007	7	0.16	0.02	0.32	0.02	0.5	0.15	0.04	0.32	0.03	AMFARFTEME+DLVLPDGNR+DYDSPERER+EMMESFEGPQPADVRLMK+ESAAADAGFALFEKK+GAGLGAKGSAYGLSGADSYKDAVR+GSAYGLSGADSYK+GSAYGLSGADSYKDAVR+IDGKTIGVDFAKSAR+LSEQELEALELR+LSEQELEALELRER+MLQAMGWREGSGLGR+NIAPHTVVDSIMTALSPYASLAVNNIR+NSFQPVNSLR+QFPNKDALVR+QKENFKNSFQPVNSLR+SGRYGSIIDR+SKTAQQIAKDMER+SRLSEQELEALELR+TIGVDFAKSAR
368	sp|Q1RMU7|SESQ2_BOVIN tr|L8HVU3|L8HVU3_9CETA	1	Sesquipedalian-2 OS=Bos taurus GN=FAM109B PE=2 SV=1;Protein FAM109B OS=Bos mutus GN=M91_14877 PE=4 SV=1	31.7	8	0.003	5	0.16	0.02	0.31	0.02	0.516129	0.16	0.02	0.35	0.03	ALSRASFGYMRLVVR+ASFGYMRLVVR+DCSPMGLVEEGGSRPAGR+LNERSVAHYALSDSPADHTGFLR+RSSWKAVSSR+TWGGAGTPPTPSGAGR
369	sp|Q1RMV0|PEX5_BOVIN tr|L8HPW5|L8HPW5_9CETA	1	Peroxisomal targeting signal 1 receptor OS=Bos taurus GN=PEX5 PE=2 SV=1;Peroxisomal targeting signal 1 receptor (Fragment) OS=Bos mutus GN=M91_00204 PE=4 SV=1	24.7	8	0.003	4	0.25	0.03	0.23	0.04	1.08696	0.25	0.03	0.26	0.01	DHPQPFEEGLR+ELFLAAVR+ELVEAECGGANPLMKLAGHFTQDKALR+GEGGAMSENIWSTLR+LALSMLGQSDAYGAADAR+LANSEFLKFVR+LGATLANGNQSEEAVAAYRR+QACETLRDWLR+SAIESDVDFWDKLQAELEEMAKR+YNLGISCINLGAHR
370	sp|Q1RMX9|DCNL5_BOVIN tr|L8J3Z0|L8J3Z0_9CETA	1	DCN1-like protein 5 OS=Bos taurus GN=DCUN1D5 PE=2 SV=1;DCN1-like protein OS=Bos mutus GN=M91_06497 PE=4 SV=1	28	14	0.004	4	0.21	0.05	0.37	0.08	0.567568	0.16	0.02	0.21	0.04	DQRSLDIDTAKSMLALLLGR+KSGVAAAAAEDGGLK+LEAESMGFFTKEEWLKGMTSLQCDCTEK+SGVAAAAAEDGGLK+SGVAAAAAEDGGLKK+SGVAAAAAEDGGLKKCK+SLDIDTAKSMLALLLGR
371	sp|Q27958|DPOLB_BOVIN tr|L8I911|L8I911_9CETA	1	DNA polymerase beta OS=Bos taurus GN=POLB PE=2 SV=3;DNA polymerase beta OS=Bos mutus GN=M91_05776 PE=4 SV=1	21.5	27	0.01	18	0.17	0.01	0.28	0.02	0.607143	0.22	0.01	0.3	0.01	IKSGAEAKK+IPREEMLQMQDIVLSEVKK+NMRAHALEK+QDDTSSSINFLTR+SGAEAKKLPGVGTK+VDSEYIATVCGSFRR
372	sp|Q27966-2|MYO1C_BOVIN sp|Q27966-3|MYO1C_BOVIN sp|Q27966|MYO1C_BOVIN tr|L8IZM3|L8IZM3_9CETA	1	Isoform 2 of Unconventional myosin-Ic OS=Bos taurus GN=MYO1C;Isoform 3 of Unconventional myosin-Ic OS=Bos taurus GN=MYO1C;Unconventional myosin-Ic OS=Bos taurus GN=MYO1C PE=1 SV=3;Myosin-Ic OS=Bos mutus GN=M91_14681 PE=4 SV=1	20.1	19	0.007	8	0.13	0.02	0.31	0.02	0.419355	0.19	0.02	0.34	0.03	AKNGHLAVVAPR+DQAVMISGESGAGK+DQAVMISGESGAGKTEATK+DQAVMISGESGAGKTEATKR+DRLLQSNPVLEAFGNAK+EASELLRELCRK+INRSLASKDAESPSWR+KDNYPQSVPR+KGYKPRSR+LGADEINPR+MESALTAR+NILDTSWPTPPPALR+NNDLLFR+NNDLLFRNLK+QHPHFLTHKLADQRTR+QLLLTPNAVVIVEDAK+QLPRNILDTSWPTPPPALREASELLR+QPGRFDEVLIR+QSLATKIQATWR+VSSINDKSDWK
373	sp|Q27969|ITFG2_BOVIN	1	Integrin-alpha FG-GAP repeat-containing protein 2 OS=Bos taurus GN=ITFG2 PE=2 SV=1	11.1	9	0.002	4	0.16	0.02	0.32	0.02	0.5	0.18	0.04	0.32	0.05	IYVYWEVQLERMESTNLLK+MAAPLGCGDCRPPGRLGEGR+QHIPANTK+QHIPANTKVMLISDIDGDGR+VMLISDIDGDGR
374	sp|Q28009|FUS_BOVIN tr|L8J1R4|L8J1R4_9CETA	1	RNA-binding protein FUS OS=Bos taurus GN=FUS PE=2 SV=2;RNA-binding protein FUS (Fragment) OS=Bos mutus GN=M91_19514 PE=4 SV=1	29.1	56	0.012	15	0.18	0.02	0.31	0.02	0.580645	0.21	0.02	0.27	0.02	ADFNRGGGNGRGGR+GGDRGGFRGGR+GGFNKFGGPR+GGFPSGGGGGGGQQR+GGFPSGGGGGGGQQRAGDWK+GGFRGGRGGGDR+GGGGGYNRSSGGYEPRGR+GGGNGRGGRGR+GGMGGSDRGGFNKFGGPR+GGPMGRGGYGGGGSGGGGR+GGRGGYDR+GGRGRGGPMGR+GGYDRGGYR+GGYDRGGYRGR+GGYGGGGSGGGGR+GGYGGGGSGGGGRGGFPSGGGGGGGQQR+GRGGPMGRGGYGGGGSGGGGR+KTGQPMINLYTDR+QIGIIKTNK+RADFNRGGGNGR+SSGGYEPRGRGGGR+TGQPMINLYTDR
375	sp|Q28021|ROCK2_BOVIN tr|F1N319|F1N319_BOVIN	1	Rho-associated protein kinase 2 OS=Bos taurus GN=ROCK2 PE=1 SV=1;Rho-associated protein kinase 2 (Fragment) OS=Bos taurus GN=ROCK2 PE=4 SV=2	30.4	43	0.008	17	0.17	0.02	0.33	0.02	0.515152	0.17	0.01	0.3	0.01	ADAKEIPR+DATIASLEETNR+DEEISAAAIKAQFEK+DLQDKNCLLETAKLK+DSLAAQLEITLTK+DVLNEDVRNLTLK+EELEQKCKSVNTR+EKIMKELEIK+EKNNMEIDMTYQLK+ELEEEITLR+ELEIKEMMAR+ELKEECEEK+ELNEMQAQIAEESQIR+IELQMTLDSKDSDIEQLR+IEQETQKR+IEQETQKRCLTQNDLK+IIHRDVK+IMKELEIK+IMKELEIKEMMAR+IPKKPPAPDPFAR+ISGLEEDVK+IYESIEEAKSEAMK+KNVESTLR+KPPAPDPFAR+LAEIMNR+LDFPALR+MQTQQVNTLKMSEKQLK+MSLEKQNAELRK+NCLLETAK+NDQWNWDNIR+NEESQEIQK+NGVEEIKQHPFFKNDQW…
376	sp|Q28030|AT1B2_BOVIN tr|A6QLL5|A6QLL5_BOVIN tr|L8IL27|L8IL27_9CETA	1	Sodium/potassium-transporting ATPase subunit beta-2 OS=Bos taurus GN=ATP1B2 PE=2 SV=1;Sodium/potassium-transporting ATPase subunit beta OS=Bos taurus GN=ATP1B2 PE=2 SV=1;Sodium/potassium-transporting ATPase subunit beta OS=Bos mutus GN=M91_20386 PE=3 SV=1	9.7	2	0.001	0	-9	-9	-9	-9	1	-9	-9	-9	-9	EFVWNPRTHQFMGR+INAANIATDDERDK
377	sp|Q28044|ADRB2_BOVIN tr|L8HR98|L8HR98_9CETA	1	Beta-2 adrenergic receptor OS=Bos taurus GN=ADRB2 PE=2 SV=2;Beta-2 adrenergic receptor OS=Bos mutus GN=M91_08542 PE=3 SV=1	16.7	5	0.002	3	0.11	0.01	0.32	0.03	0.34375	0.11	0.06	0.42	0.04	AYGNGCSSNSNDR+EAINCYAK+IAFQELLCLRR+NCSTNDSLL+SEGRFHAQNVSQVEQDGR+VFQVAKRQLQK
378	sp|Q28068|CALI_BOVIN tr|L8HRP5|L8HRP5_9CETA	1	Calicin OS=Bos taurus GN=CCIN PE=1 SV=1;Calicin OS=Bos mutus GN=M91_10876 PE=4 SV=1	30.8	13	0.004	3	0.18	0.04	0.28	0.03	0.642857	0.21	0.06	0.29	0.07	AGEWKTLAPPPEALDCPACCLAK+DNFHYWASPEGCVHFMR+ETWCLAGKMSIPMDGTAVITRGDR+EVSDLAYSGIR+GDRNLYIVTGRCLVK+KGALLDSVVILGGQK+LMGMENSSAHSTLIESVLVDR+NLISNHDMK+NLYIVTGR+NVLAAVSPLVK+VFVCGGVTTTTDVQTK+YLFLAELFELKEVSDLAYSGIR+YVSNIYRYDER
379	sp|Q28106|CNTN1_BOVIN tr|F1MVI0|F1MVI0_BOVIN tr|L8IHI7|L8IHI7_9CETA	1	Contactin-1 OS=Bos taurus GN=CNTN1 PE=2 SV=1;Contactin-1 OS=Bos taurus GN=CNTN1 PE=4 SV=1;Contactin-1 (Fragment) OS=Bos mutus GN=M91_00872 PE=4 SV=1	15.9	11	0.003	2	0.06	0	0.37	0.15	0.162162	0.2	0.01	0.32	0.14	DAKTDPPIIEGNMEAAR+DETMRPSTAFQVK+GMVLLCDPPYHFPDDLSYR+GPPGPPGGLR+GSDNHSPISK+ILAAKGGRVIIECKPK+ILIWEDGSLEINNITR+NFMLDSNGELLIR+NFMLDSNGELLIRNAQLKHAGR+SDGGVYTCFVENNKGK+TDPPIIEGNMEAAR+TILSDDWKDAK+VTVTNPDTGR
380	sp|Q28141|DHX9_BOVIN tr|G5E5N3|G5E5N3_BOVIN tr|L8HPJ9|L8HPJ9_9CETA	1	ATP-dependent RNA helicase A OS=Bos taurus GN=DHX9 PE=2 SV=1;ATP-dependent RNA helicase A OS=Bos taurus GN=DHX9 PE=1 SV=1;ATP-dependent RNA helicase A OS=Bos mutus GN=M91_09891 PE=4 SV=1	16.6	33	0.01	9	0.19	0.01	0.28	0.02	0.678571	0.19	0.01	0.33	0.02	DAQSNAAR+DINTDFLLVVLR+GESGGGYRGSGGFQRGGGR+GGGRGGYGGGYFGQGR+GGSSYSGGGYGLGGYGTGGYGGGGGYGGR+GGYGGGYFGQGR+GGYSGGGYGGGSNSFR+GSGGFQRGGGR+GSGGFQRGGGRGGYGGGYFGQGR+GSYVGGGGGVGGGGGGFR+GSYVGGGGGVGGGGGGFRGLSR+IKEIILN+ISAVSVAER+LNMATLR+LNMATLRMTWEAKVQLK+MGGEEAEIR+MTPSYEIRAVGNKNR+MTWEAKVQLK+NRQKFMCEVR+QIGRRIFAR+QKFMCEVR+TPLHEIALSIKLLR+VQSDGQLVLVDDWIR
381	sp|Q28156|PDE5A_BOVIN	1	cGMP-specific 3',5'-cyclic phosphodiesterase OS=Bos taurus GN=PDE5A PE=1 SV=1	18	9	0.004	6	0.17	0.03	0.33	0.03	0.515152	0.17	0.01	0.3	0.01	EGIKGHTESCSCPLQPSPR+ELNIEPADLMNR+ELNIEPADLMNREKK+EMVNAWFAERVHTIPVCK+FDNDEGDQCSR+IAATIISFMQVQK+KIAATIISFMQVQK+KSGNGGTFTEKDEK+NTMEPLNIPDVSK+NVAYHNWRHAFNTAQCMFAALKAGK+QAILATDLALYIKRR+TLINGESSQTKR
382	sp|Q29397|SV2A_BOVIN tr|L8ILF4|L8ILF4_9CETA	1	Synaptic vesicle glycoprotein 2A OS=Bos taurus GN=SV2A PE=2 SV=1;Synaptic vesicle glycoprotein 2A OS=Bos mutus GN=M91_14433 PE=4 SV=1	15.1	10	0.002	2	0.15	0.02	0.31	0.01	0.483871	0.16	0.01	0.38	0.02	AESGGKGER+AESGGKGERMADGAPLAGVR+DMCLSDSNK+DRAAFIRGAK+GGLGDGEGPPGGR+GGLGDGEGPPGGRGEAQR+GGQYFNDKFIGLR+GMLGLIVYLGMMVGAFLWGGLADRLGR+MADGAPLAGVRGGLGDGEGPPGGR+QVHDTNMR+QVHDTNMRAK+QVHDTNMRAKGHPER
383	sp|Q29441|CNGA3_BOVIN tr|L8HLT0|L8HLT0_9CETA	1	Cyclic nucleotide-gated cation channel alpha-3 OS=Bos taurus GN=CNGA3 PE=2 SV=1;Cyclic nucleotide-gated cation channel alpha-3 OS=Bos mutus GN=M91_04304 PE=4 SV=1	21.5	9	0.003	3	0.17	0.04	0.3	0.05	0.566667	0.21	0.03	0.3	0.01	DIEEKVEHLETSLDSLQTR+DLDCIENGLSR+DLETRVIR+ESHVQFNVGSQEPPDR+ESHVQFNVGSQEPPDRGR+FARLLAEYNATQMK+IDSIKQYMQFR+ISTQYSHPTR+KGDIGREMYIIK+LRPAVFSPGDYICK+LSRLIISLRAWSAR+NNTNTCNNSEK+SGNRRTANIR
384	sp|Q29466-2|VPP1_BOVIN sp|Q29466|VPP1_BOVIN tr|A7Z016|A7Z016_BOVIN tr|F1MH43|F1MH43_BOVIN tr|F1MJV0|F1MJV0_BOVIN	1	Isoform 2 of V-type proton ATPase 116 kDa subunit a isoform 1 OS=Bos taurus GN=ATP6V0A1;V-type proton ATPase 116 kDa subunit a isoform 1 OS=Bos taurus GN=ATP6V0A1 PE=2 SV=1;V-type proton ATPase subunit a OS=Bos taurus GN=ATP6V0A1 PE=2 SV=1;V-type proton ATPase subunit a OS=Bos taurus GN=ATP6V0A1 PE=3 SV=1;V-type proton ATPase subunit a OS=Bos taurus GN=ATP6V0A1 PE=3 SV=1	16.1	6	0.002	2	0.19	0.03	0.27	0.03	0.703704	0.19	0.01	0.35	0.02	APSLLIHFINMFLFSYGDSGNSMLYSGQK+ASLYPCPETPQERK+DMIDLEANFEKIENELK+EMASGVNTR+GTEHSGSTVPSILNR+MLWRVCRGNVFLR+NENEMFSTIFSGR+NFLELTELKFILR+NIRVWFIKVR+RGTEHSGSTVPSILNR
385	sp|Q29626|PTGIS_BOVIN tr|L8IBN3|L8IBN3_9CETA	1	Prostacyclin synthase OS=Bos taurus GN=PTGIS PE=1 SV=1;Prostacyclin synthase (Fragment) OS=Bos mutus GN=M91_17010 PE=4 SV=1	22	17	0.005	7	0.22	0.01	0.26	0.02	0.846154	0.24	0.02	0.27	0.03	DAAGFLTR+DAAGFLTRMKEK+DPEIYTDPEVFK+DPEIYTDPEVFKYNR+ELQALTDAMYTNLR+EVVADLALPMADGR+EVVADLALPMADGREFSLR+GSLSAGDKDR+GSLSAGDKDRVGK+HGDIFTVLVGGR+LTAAPFITREVVADLALPMADGR+NPEALAAVR
386	sp|Q29RI6|CAB39_BOVIN tr|L8J576|L8J576_9CETA	1	Calcium-binding protein 39 OS=Bos taurus GN=CAB39 PE=2 SV=1;Calcium-binding protein 39 OS=Bos mutus GN=M91_11018 PE=4 SV=1	30.8	12	0.004	2	0.17	0.03	0.34	0.06	0.5	0.28	0.08	0.16	0.11	ATEEVSKNLVAMKEILYGTNEK+ESMAVLEKQDISDK+LLGELLLDRHNFTIMTK+LMMNLLR+LMMNLLRDKSR+MPFPFGKSHKSPADIVK+NLKESMAVLEK+NLKESMAVLEKQDISDK+NQAKLIEFLSK+QSLKLLGEILLDR+SHKSPADIVK+TQPILDILLK
387	sp|Q29RK0|ZN574_BOVIN tr|G5E624|G5E624_BOVIN tr|L8HUI0|L8HUI0_9CETA	1	Zinc finger protein 574 OS=Bos taurus GN=ZNF574 PE=2 SV=1;Zinc finger protein 574 (Fragment) OS=Bos taurus GN=ZNF574 PE=4 SV=1;Zinc finger protein 574 (Fragment) OS=Bos mutus GN=M91_20830 PE=4 SV=1	8.4	6	0.002	4	0.18	0.04	0.29	0.05	0.62069	0.22	0.05	0.26	0.05	CSSCGAAFPSSLRLR+EPPAPRAPRAAR+FECGTCGKKVGSAAR+LLEVHQLVAHAGR+NGEALGRDR+RLLEVHQLVAHAGRQPHR
388	sp|Q29RL1-2|CF165_BOVIN sp|Q29RL1|CF165_BOVIN tr|L8I3U5|L8I3U5_9CETA	1	Isoform 2 of UPF0704 protein C6orf165 homolog OS=Bos taurus;UPF0704 protein C6orf165 homolog OS=Bos taurus PE=2 SV=2;Uncharacterized protein OS=Bos mutus GN=M91_07407 PE=4 SV=1	23.2	18	0.005	7	0.18	0.02	0.32	0.02	0.5625	0.16	0.03	0.3	0.02	EHIEDKVNVADFKK+ENCSQVYPSKDVGTQSMR+ENCSQVYPSKDVGTQSMREGSSR+GGQTKTTYGVK+KIVSYVLLRSGLGSPTDIK+NPLMSQELQPYMLR+NPLMSQELQPYMLREALYNVR+NPSLDTIK+SDVQKLVKLCVNR+SGLGSPTDIKIVR+VIESRLSSVSR+VPRPQIYIAGLR
389	sp|Q29RM6-2|NRAC_BOVIN sp|Q29RM6|NRAC_BOVIN tr|G5E5T8|G5E5T8_BOVIN tr|L8IE15|L8IE15_9CETA	1	Isoform 2 of Nutritionally-regulated adipose and cardiac-enriched protein homolog OS=Bos taurus GN=NRAC;Nutritionally-regulated adipose and cardiac-enriched protein homolog OS=Bos taurus GN=NRAC PE=2 SV=2;Uncharacterized protein OS=Bos taurus GN=C14orf180 PE=4 SV=1;Uncharacterized protein (Fragment) OS=Bos mutus GN=M91_07057 PE=4 SV=1	34.2	17	0.005	7	0.17	0.02	0.34	0.03	0.5	0.15	0.01	0.3	0.03	KNEEAAPGSPTPR+NEEAAPGSPTPR+NEEAAPGSPTPRAGR+NEEAAPGSPTPRAGREGR+TTRHVRFR
390	sp|Q29RP1|UBP1_BOVIN tr|F1MKU4|F1MKU4_BOVIN tr|L8IB34|L8IB34_9CETA	1	Ubiquitin carboxyl-terminal hydrolase 1 OS=Bos taurus GN=USP1 PE=2 SV=1;Ubiquitin carboxyl-terminal hydrolase 1 OS=Bos taurus GN=USP1 PE=4 SV=2;Ubiquitin carboxyl-terminal hydrolase 1 OS=Bos mutus GN=M91_03699 PE=4 SV=1	15.3	7	0.002	0	-9	-9	-9	-9	1	-9	-9	-9	-9	DFLNSLSPSTSPTSTPYLLFYK+GAEQIGFELVEK+GSEIDQVVPAAQSSPINCEKR+HLFNIISRK+IATNQGSK+INTPLLTPLK+NVEAIGLLGGQKSK+QPSILSKFCSMGKIATNQGSK+WAISQFASVER
391	sp|Q29RR5|TFP11_BOVIN tr|F1MR60|F1MR60_BOVIN	1	Tuftelin-interacting protein 11 OS=Bos taurus GN=TFIP11 PE=2 SV=2;Tuftelin-interacting protein 11 OS=Bos taurus GN=TFIP11 PE=3 SV=1	27.7	20	0.005	9	0.16	0.02	0.32	0.04	0.5	0.22	0.01	0.25	0.03	AEEHNIVFMPVIGKR+ARDYSAPVNFISAGLKK+DFQYEAMQERREAENMAQR+DKFNEALDIMNR+DKYYEEYRMSDR+DVFTPGSWEAFMVK+DYSAPVNFISAGLK+EAENMAQR+FNEALDIMNR+FNEALDIMNRAVSSNVGAYMQPGAR+GIGQKLLQKMGYVPGR+GLGKNAQGIINPIEAK+HSVPDDGLPPQAQPPPPPGK+KPKYSYKTVEELK+LILQPWK+LLQKMGYVPGR+MSLSHLYRDGEGHMDDDEDER+NDRQLQYER+TVEELKAKGR+VFQTLRDKYYEEYR+VIDMTGR+WHPSDSSAK
392	sp|Q29RT6|KI20A_BOVIN tr|L8IV31|L8IV31_9CETA	1	Kinesin-like protein KIF20A OS=Bos taurus GN=KIF20A PE=2 SV=1;Kinesin-like protein OS=Bos mutus GN=M91_11404 PE=3 SV=1	23.4	61	0.012	12	0.12	0.02	0.31	0.02	0.387097	0.18	0.03	0.33	0.02	AELNSTTEELQKYQKMLEPPPSAKPFIVDVDK+CIAALRQNQQNR+DQKSGER+DSFAQKSNER+EAGNINTSLHTLGR+ISELSLCDLAGSERCK+KAACIAEQYHTVLKLQGQASTK+LTRVFQGFFTGRGR+NQSFASTHLNQNSSRSHSIFSIR+QALATCDDILIK+QDQTLAELQNNMTLVK+QDQTLAELQNNMTLVKLDLR+SGERLKEAGNINTSLHTLGR+TPTCQSSTDCSPYAR+TYTIQGTIK
393	sp|Q2HJ18|VP33B_BOVIN tr|L8IL37|L8IL37_9CETA	1	Vacuolar protein sorting-associated protein 33B OS=Bos taurus GN=VPS33B PE=2 SV=1;Vacuolar protein sorting-associated protein 33B OS=Bos mutus GN=M91_16073 PE=4 SV=1	20.1	14	0.005	6	0.14	0.01	0.3	0.01	0.466667	0.2	0.02	0.34	0.02	EKGYRFIFLTTAVTNSAR+IANVSILK+IKNMRYIASLVNADK+ITDAFSSLAK+LMCLLSITENGLIPK+LMEAMSEVK+NMRYIASLVNADK+NMRYIASLVNADKMAGR+QMKNFVSQELK+QVSPIESLR+RLEEEEDGETKGR+TEHALLEGFNIR+YIASLVNADK
394	sp|Q2HJ40|BACE1_BOVIN tr|L8IGK5|L8IGK5_9CETA tr|V6F9A9|V6F9A9_BOVIN	1	Beta-secretase 1 OS=Bos taurus GN=BACE1 PE=2 SV=1;Beta-secretase 1 OS=Bos mutus GN=M91_09753 PE=3 SV=1;Beta-secretase 1 OS=Bos taurus GN=BACE1 PE=3 SV=1	14.8	16	0.006	10	0.18	0.01	0.31	0.01	0.580645	0.19	0.01	0.31	0.01	ETDEESEEPGR+EYNYDKSIVDSGTTNLR+GSFVEMVDNLR+GSFVEMVDNLRGK+KVFEAAVK+LPRETDEESEEPGRR+RGSFVEMVDNLRGK+SGLGGAPLGLR+SGLGGAPLGLRLPR+SIKAASSTEK
395	sp|Q2HJ46|RNF8_BOVIN tr|L8HYF6|L8HYF6_9CETA	1	E3 ubiquitin-protein ligase RNF8 OS=Bos taurus GN=RNF8 PE=2 SV=1;E3 ubiquitin-protein ligase RNF8 OS=Bos mutus GN=M91_08141 PE=3 SV=1	21.1	19	0.006	10	0.25	0.02	0.2	0.02	1.25	0.28	0.02	0.24	0.02	DIKSKTR+DKELEQTK+DNKSLNGVWLNR+GKVASQPSEYLDPK+ILMLKTQMQEK+MVDNLNSEVK+NFEAIIQAKDK+QNAEGQWTIKDNKSLNGVWLNR+RVGMNTEWLLLEDGNEVTVGR+VGMNTEWLLLEDGNEVTVGR
396	sp|Q2HJ49|MOES_BOVIN tr|L8II38|L8II38_9CETA	1	Moesin OS=Bos taurus GN=MSN PE=2 SV=3;Moesin (Fragment) OS=Bos mutus GN=M91_15303 PE=4 SV=1	28.8	16	0.005	7	0.19	0.02	0.29	0.02	0.655172	0.22	0.02	0.28	0.03	ALELEQER+EELMERLK+EVHKSGYLAGDR+ILALCMGNHELYMR+IQVWHEEHRGMLR+ISQLEMAR+KESPLLFKFR+KTANDMIHAENMR+KTANDMIHAENMRLGR+KTQEQLALEMAELTAR+NISFNDK+QLFDQVVKTIGLREIWFFGLQYQDTK+QMERALLENEK+QRIDEFESM+RILALCMGNHELYMRR+SGYLAGDR+SGYLAGDRLLPQR+TANDMIHAENMR+TANDMIHAENMRLGR
397	sp|Q2HJ55|SAM50_BOVIN tr|G3MZZ3|G3MZZ3_BOVIN	1	Sorting and assembly machinery component 50 homolog OS=Bos taurus GN=SAMM50 PE=2 SV=1;Sorting and assembly machinery component 50 homolog OS=Bos taurus GN=SAMM50 PE=4 SV=1	32.8	18	0.005	6	0.15	0.01	0.25	0.04	0.6	0.23	0.04	0.32	0.04	AKNLIEVMRK+DDIIMYEIR+DVVVQHVHFDGLGR+DVVVQHVHFDGLGRTKDDIIMYEIR+KESGHSLKSSLSHSMVIDSR+LAECIRWSYGAGIVLR+LELNYCVPMGVQR+LTGSYNTMVGNNEGSMVLGLK+NLIEVMRKSHEAR+NSSILPKRGALLK+QLILDTVFSASLWGGMLVPMGDKPSSIADR+RLTGSYNTMVGNNEGSMVLGLK+TKDDIIMYEIR+VVVQHVHFDGLGRTK
398	sp|Q2HJ60|ROA2_BOVIN tr|L8I257|L8I257_9CETA	1	Heterogeneous nuclear ribonucleoproteins A2/B1 OS=Bos taurus GN=HNRNPA2B1 PE=2 SV=1;Heterogeneous nuclear ribonucleoproteins A2/B1 (Fragment) OS=Bos mutus GN=M91_04236 PE=4 SV=1	31.6	7	0.004	7	0.16	0.01	0.3	0.02	0.533333	0.21	0.03	0.31	0.02	ALSRQEMQEVQSSR+EESGKPGAHVTVKK+GGNFGFGDSR+IDTIEIITDRQSGK+LFIGGLSFETTEESLR+NMGGPYGGGNYGPGGSGGSGGYGGR+NMGGPYGGGNYGPGGSGGSGGYGGRSR+QEMQEVQSSR+YHTINGHNAEVR
399	sp|Q2HJ75|RITA1_BOVIN tr|L8I2P4|L8I2P4_9CETA	1	RBPJ-interacting and tubulin-associated protein 1 OS=Bos taurus GN=RITA1 PE=2 SV=1;Uncharacterized protein OS=Bos mutus GN=M91_10538 PE=4 SV=1	23.4	8	0.004	2	0.15	0.02	0.41	0.04	0.365854	0.13	0.02	0.31	0.04	LSVDGLDTPRPLRR+QEGAGWEAK+QEGAGWEAKWMAR+QEGAGWEAKWMARGDAAK+RLSVDGLDTPRPLR+TEHRVMASSRR+TPVELAISGMQTLHVQHR+TPVELAISGMQTLHVQHRGR+VMASSRR+VMASSRRLSVDGLDTPRPLR
400	sp|Q2HJ90|LRC42_BOVIN tr|L8I397|L8I397_9CETA	1	Leucine-rich repeat-containing protein 42 OS=Bos taurus GN=LRRC42 PE=2 SV=1;Leucine-rich repeat-containing protein 42 OS=Bos mutus GN=M91_12028 PE=4 SV=1	29	10	0.003	6	0.2	0.02	0.29	0.03	0.689655	0.2	0.01	0.3	0.01	DNCLSDAGVR+EKAADCHGPLLK+HEALSSQESKK+KMTAPVRVMK+LFPKGFSVELCMNR+LFSAAEARQKFTEPGAGLR+LKDNCLSDAGVR+LNCLDISGTGLK+LNCLDISGTGLKDIKAVK+LQFYKEKAADCHGPLLK+TDHFIFTYTR+YPLTEAHMNSSEKLQFYKEK
401	sp|Q2HJ93|PHF11_BOVIN tr|L8I1I0|L8I1I0_9CETA	1	PHD finger protein 11 OS=Bos taurus GN=PHF11 PE=2 SV=1;PHD finger protein 11 OS=Bos mutus GN=M91_14947 PE=4 SV=1	20.2	6	0.002	5	0.22	0.01	0.29	0.02	0.758621	0.18	0.03	0.29	0.03	CKEAGLLDALFEEILDKLHLIQER+DGRHTDAIVK+DIVPLPTGVFQVAERLQK+NDHAVLQADGR+NDHAVLQADGRTGIYK
402	sp|Q2HJA9|PHLP_BOVIN tr|L8HKN3|L8HKN3_9CETA tr|Q9GJT4|Q9GJT4_BOVIN	1	Phosducin-like protein OS=Bos taurus GN=PDCL PE=2 SV=1;Phosducin-like protein OS=Bos mutus GN=M91_20743 PE=4 SV=1;Phosducin-like protein OS=Bos taurus GN=phlp PE=2 SV=1	28.4	19	0.004	5	0.16	0.05	0.24	0.05	0.666667	0.21	0.05	0.31	0.05	DLQEKISGK+DLQEKISGKMTLK+GGELIGNFVR+ISGKMTLK+KQRMEEMR+QVFEIPSGEGFLDMIDK+VRSSVIGASSRFTR
403	sp|Q2HJD7|3HIDH_BOVIN tr|L8I240|L8I240_9CETA	1	3-hydroxyisobutyrate dehydrogenase, mitochondrial OS=Bos taurus GN=HIBADH PE=2 SV=1;3-hydroxyisobutyrate dehydrogenase, mitochondrial OS=Bos mutus GN=M91_04220 PE=4 SV=1	39.9	8	0.002	4	0.17	0.02	0.32	0.05	0.53125	0.22	0.04	0.26	0.03	GAASGLRYWSR+GSLLIDSSTIDPMVSK+ICNNLLLAISMIGTAEAMNLGIR+IITMLPTSINAIEAYSGANGILKK+ILNMSSGR+KGSLLIDSSTIDPMVSKELAK+LGLDPKLLAKILNMSSGR+LLAKILNMSSGR+MGAVFMDAPVSGGVGAAR+QPPAVASLAAVCSR+QPPAVASLAAVCSRSMASK
404	sp|Q2HJE1|WDR91_BOVIN	1	WD repeat-containing protein 91 OS=Bos taurus GN=WDR91 PE=2 SV=2	21.7	17	0.005	8	0.21	0.02	0.26	0.03	0.807692	0.18	0.02	0.31	0.03	ASSISKSPLLSLEWATKR+DRLLLLGSGVGTVR+ERKELLSMTLQCAEK+ESFGSQTTKGR+GTNQVPGR+IKLTTLLAHK+IKLTTLLAHKV+KEEQQPEEEEALVQHK+KELLSMTLQCAEK+LLLLGSGVGTVR+LPPYVSNMDR+LQDHGKER+LSPAQGPPQTQSSAK+LSPAQGPPQTQSSAKK+LTTLLAHK+NLCEININDDMPR+VDCSGRR+VGFLSSLLPQSKKSPSR
405	sp|Q2HJF3|ORC6_BOVIN tr|L8IRR5|L8IRR5_9CETA	1	Origin recognition complex subunit 6 OS=Bos taurus GN=ORC6 PE=2 SV=1;Origin recognition complex subunit 6 OS=Bos mutus GN=M91_08256 PE=4 SV=1	46.8	12	0.003	2	0.2	0.04	0.24	0.03	0.833333	0.28	0	0.26	0.07	AIFDRLCKQLEK+CPLDRAYLIKLSGLNK+EAGDSVTPPQK+LAPRLGIAEQEVLR+LSRVKCVGLSAR+MESGLIRR+NILENAAR+NKMAATSGVK+QLEKIGQQIDR+RNILENAAR+TTETSNAVMCLDLAASCMK
406	sp|Q2HJF9|RSAD2_BOVIN tr|L8I5W2|L8I5W2_9CETA	1	Radical S-adenosyl methionine domain-containing protein 2 OS=Bos taurus GN=RSAD2 PE=2 SV=1;Radical S-adenosyl methionine domain-containing protein 2 OS=Bos mutus GN=M91_20368 PE=4 SV=1	31.7	14	0.004	6	0.13	0.02	0.29	0.04	0.448276	0.17	0.03	0.37	0.04	AASWLAGGERSRPLQDR+DSYLILDEYMR+EAGMEKINFSGGEPFLQDR+FSGFDEKMFLK+INFSGGEPFLQDRGEYLGR+INSVINR+INSVINRFNVDEDMK+MWMLVPIAFALK+NHVENLQKLR+QCNYKCGFCFHTAK
407	sp|Q2HJG2|PUF60_BOVIN tr|F1N238|F1N238_BOVIN tr|L8J287|L8J287_9CETA	1	Poly(U)-binding-splicing factor PUF60 OS=Bos taurus GN=PUF60 PE=2 SV=1;Poly(U)-binding-splicing factor PUF60 OS=Bos taurus GN=PUF60 PE=4 SV=1;Poly(U)-binding-splicing factor PUF60 (Fragment) OS=Bos mutus GN=M91_04705 PE=4 SV=1	11.9	9	0.003	2	0.24	0.03	0.31	0.03	0.774194	0.18	0.02	0.27	0.03	IYVASVHQDLSDDDIK+KQESTVMVLR+MENGQGTAAK+QESTVMVLR+QESTVMVLRNMVDPK+QGEEEDAEIIVK+QRALAIMCR
408	sp|Q2HJG8|TAF7_BOVIN tr|F1N4B6|F1N4B6_BOVIN	1	Transcription initiation factor TFIID subunit 7 OS=Bos taurus GN=TAF7 PE=2 SV=1;Transcription initiation factor TFIID subunit 7 OS=Bos taurus GN=TAF7 PE=4 SV=1	30.4	12	0.004	5	0.17	0.03	0.26	0.01	0.653846	0.23	0.02	0.32	0.03	DDAPHELESQFILR+DRLSIELHPDGR+ETENQGLDISSPGMSGHR+KKYIESPDVEK+LPPEYASTVRR+QEDLIMKVENLALK+QEDLIMKVENLALKNR+QIDNMKGKLQETQDR+VDRVPLAAK
409	sp|Q2KHU0|SERB_BOVIN tr|L8J1Q1|L8J1Q1_9CETA	1	Phosphoserine phosphatase OS=Bos taurus GN=PSPH PE=2 SV=1;Phosphoserine phosphatase (Fragment) OS=Bos mutus GN=M91_19495 PE=4 SV=1	33.3	12	0.003	2	0.11	0.16	0.3	0.01	0.366667	0.16	0.06	0.33	0.1	ELVSRLQER+FYFNGEYAGFDETQPTAESGGK+LLAEHPPHLTPGIR+LNIPSTNVFANR+LNIPSTNVFANRLK+QAMGGAVPFKAALTQR
410	sp|Q2KHV7|UBP2_BOVIN tr|L8IJR8|L8IJR8_9CETA	1	Ubiquitin carboxyl-terminal hydrolase 2 OS=Bos taurus GN=USP2 PE=2 SV=1;Ubiquitin carboxyl-terminal hydrolase 2 OS=Bos mutus GN=M91_09702 PE=4 SV=1	24.6	12	0.004	5	0.21	0.01	0.28	0.02	0.75	0.22	0.03	0.29	0.01	AHTALMEEFAK+CIKKFSIQR+DLSHSSRAHTALMEEFAK+DTMNSKSAQGLAGLR+FPKILVLHLKR+IGDLFVGQLK+IRTSKLTAFVNFPLR+LDSGNLGR+LDSGNLGRSPMLAR+LDSGNLGRSPMLARTR+LIQTIWTSSPNDVVSPSEFK+LTAFVNFPLR+TQIQRYAPRFVGYNQQDAQEFLR+TYGPPSILDYDR
411	sp|Q2KHW5|ACBG1_BOVIN	1	Long-chain-fatty-acid--CoA ligase ACSBG1 OS=Bos taurus GN=ACSBG1 PE=2 SV=1	19.4	13	0.004	6	0.12	0.02	0.47	0.08	0.255319	0.12	0.01	0.21	0.06	DFSISGGELGPTMK+ELIITAGGENVPPVPIEEAVK+GFLKLGLER+GSLVNTLR+LADYLVLAK+LDADGFLYITGR+LVNEDAEGIGEICLWGR+LYAGYGLSETSGPHFMSSPYNYR+NFYGAAPMTAETQHFFLGLNIR+WAILEKDFSISGGELGPTMK
412	sp|Q2KI19|GPT11_BOVIN tr|L8I6Z5|L8I6Z5_9CETA	1	G patch domain-containing protein 11 OS=Bos taurus GN=GPATCH11 PE=2 SV=2;Coiled-coil domain-containing protein 75 OS=Bos mutus GN=M91_08057 PE=4 SV=1	13.1	3	0.002	3	0.17	0.05	0.32	0.05	0.53125	0.2	0.06	0.26	0.06	LLTSYLR+MGYKSGQALGK+QDEMKLEGDLRR+SGIGHETLLK+SGIGHETLLKR
413	sp|Q2KI51|PR15A_BOVIN tr|G3X6A2|G3X6A2_BOVIN tr|L8IKH8|L8IKH8_9CETA	1	Protein phosphatase 1 regulatory subunit 15A OS=Bos taurus GN=PPP1R15A PE=2 SV=2;Protein phosphatase 1 regulatory subunit 15A OS=Bos taurus GN=PPP1R15A PE=4 SV=1;Protein phosphatase 1 regulatory subunit 15A OS=Bos mutus GN=M91_16016 PE=4 SV=1	9.6	25	0.007	11	0.23	0.01	0.27	0.01	0.851852	0.23	0.01	0.27	0.01	DRSRFAR+DSGAAEEDR+GTHPLFLLSPLMGLLSR+LPLRLQRR+QAEKGDADPGPHFTSLAQRPSLR
414	sp|Q2KI54|ARMC8_BOVIN tr|L8HS74|L8HS74_9CETA	1	Armadillo repeat-containing protein 8 OS=Bos taurus GN=ARMC8 PE=2 SV=1;Armadillo repeat-containing protein 8 OS=Bos mutus GN=M91_14274 PE=4 SV=1	24.4	12	0.004	3	0.17	0.04	0.33	0.03	0.515152	0.2	0.07	0.25	0.05	DMGIVDILHKLSQSPDSNLCDK+HYVDRLFDPDPQK+IASITDHLIAMLADYFKYPSSVSAITDIKR+IVTGLSESSVKVR+KKIIDTENMMDR+LAAVRCLHSLSR+LDHDLKHAHELR+LLSDSDLNVLMKTLGLLR+LYASLGANDEDIRKK+VLQGVIDMKNAVIGNNK
415	sp|Q2KI62|PTCD3_BOVIN tr|L8IA27|L8IA27_9CETA	1	Pentatricopeptide repeat domain-containing protein 3, mitochondrial OS=Bos taurus GN=PTCD3 PE=2 SV=1;Pentatricopeptide repeat-containing protein 3, mitochondrial OS=Bos mutus GN=M91_04845 PE=4 SV=1	33.6	21	0.005	4	0.12	0.05	0.27	0.02	0.444444	0.26	0.02	0.31	0.04	AGHQLGVTWR+AHTQALSMYTELLNNR+DLELAYQVHGLLNTGDNR+DLIPSVFFPHSQTLIDLLQALDVANR+EEILMLMAR+EYGHTFRSDLK+GSSLIIYDIMDEITGK+IFALMPEK+IFALMPEKNAHSYCTMIR+IPRNELLNEFMDSAK+KKAGHQLGVTWR+LEMIPQIWK+MASVASAR+NAHSYCTMIR+NELLNEFMDSAK+NFYYSKFFSLLCLMEQIDVTLK+QTASEWPANSLNYIAILFLR+QTASEWPANSLNYIAILFLRAGRTQEAWK+SGENAAKFIINSYPK+TQEAWKMLGLFR+TQEAWKMLGLFRK
416	sp|Q2KI74|TRADD_BOVIN tr|L8IHT3|L8IHT3_9CETA	1	Tumor necrosis factor receptor type 1-associated DEATH domain protein OS=Bos taurus GN=TRADD PE=2 SV=1;Tumor necrosis factor receptor type 1-associated DEATH domain protein OS=Bos mutus GN=M91_18288 PE=4 SV=1	17.1	5	0.002	2	0.13	0.08	0.33	0.05	0.393939	0.16	0.01	0.35	0.01	CLNCICAQKPDRLR+DEELTELENALR+FVQAEGRRATLQR+LRDEELTELENALR+SDPQLIVQLRFSGR
417	sp|Q2KIA5|DNM1L_BOVIN	1	Dynamin-1-like protein OS=Bos taurus GN=DNM1L PE=2 SV=1	35.9	25	0.008	11	0.2	0.03	0.28	0.03	0.714286	0.17	0.01	0.31	0.01	DIELQIRELILR+DLLPRGTGIVTR+DTLQSELVGQLYK+EAADMLKALQGASQIIAEIR+ELPSAVSRDK+FATEYCNTIEGTAK+IIQHCSNYSTQELLR+ISGNNKGVSPEPIHLK+KEAADMLKALQGASQIIAEIR+LDLMDAGTDAMDVLMGR+LEEPSLR+LGIIGVVNR+LIKSYFLIVR+NGTKYLAR+NIQDSVPKAVMHFLVNHVK+SSLLDDLLTESEDMAQR+TLAVITKLDLMDAGTDAMDVLMGR+TLESVDPLGGLNTIDILTAIR+TLNRLLMHHIR+VPSALAPASQEPSPAASAEADGK+YPSLANRNGTKYLAR
418	sp|Q2KIE2|HAX1_BOVIN tr|F1MC83|F1MC83_BOVIN tr|L8IFC9|L8IFC9_9CETA	1	HCLS1-associated protein X-1 OS=Bos taurus GN=HAX1 PE=2 SV=1;HCLS1-associated protein X-1 OS=Bos taurus GN=HAX1 PE=4 SV=1;HCLS1-associated protein X-1 OS=Bos mutus GN=M91_20839 PE=4 SV=1	25.4	7	0.002	3	0.22	0.03	0.19	0.14	1.15789	0.25	0.05	0.22	0.08	DGPESPTPPSLDDSSSILDLFLGR+ETTVTHQEAGSSPR+GFFGFSGPRSHRDPFFGGMTR+IFGGGLESDAR+KETTVTHQEAGSSPR
419	sp|Q2KII6|NGDN_BOVIN tr|L8HSS0|L8HSS0_9CETA	1	Neuroguidin OS=Bos taurus GN=NGDN PE=2 SV=1;Neuroguidin (Fragment) OS=Bos mutus GN=M91_12882 PE=4 SV=1	40.8	8	0.003	3	0.16	0.03	0.32	0.05	0.5	0.14	0.06	0.34	0.03	ASGGSLQGHPAVLR+DQLLLMYLMDLSHLILDK+INYEESMMVR+KYVPPRLVPVHYDETEAER+LSSEDEEEDEAEEGQSGASGK+LVKTAVTGSLSENDPLR+NLQEQVMAVTAQVQTLTK+QSQEDQHRINYEESMMVR+TAVTGSLSENDPLR
420	sp|Q2KIJ2|MET18_BOVIN tr|L8I7P9|L8I7P9_9CETA	1	Histidine protein methyltransferase 1 homolog OS=Bos taurus GN=METTL18 PE=2 SV=1;Uncharacterized protein OS=Bos mutus GN=M91_03734 PE=4 SV=1	23.1	5	0.002	1	0.21	99.99	0.32	99.99	0.65625	0.24	99.99	0.23	99.99	CLIEMTFKYPT+ESLVSERQKGTHR+KVLDLGCGSGLLGIMALK+KVLDLGCGSGLLGIMALKGGAK+RCLIEMTFKYPT+RSTVAQELCKCR+TLEIIDEGLKR+VLDLGCGSGLLGIMALK+VTETLPGLQHVNISIMK
421	sp|Q2KIN0|ZCHC7_BOVIN tr|F1MUH8|F1MUH8_BOVIN tr|L8HNN7|L8HNN7_9CETA	1	Zinc finger CCHC domain-containing protein 7 OS=Bos taurus GN=ZCCHC7 PE=2 SV=2;Zinc finger CCHC domain-containing protein 7 OS=Bos taurus GN=ZCCHC7 PE=4 SV=2;Zinc finger CCHC domain-containing protein 7 OS=Bos mutus GN=M91_06582 PE=4 SV=1	15.8	9	0.004	6	0.18	0.04	0.33	0.04	0.545455	0.15	0.02	0.31	0.02	DIRTSHASWKNNR+ETQKETMSRNMR+KETQKETMSR+NSGNSESFSSKPNQK+NVTCRNCDKCGHLSK+RCDRCDMIGHYADACPEIWR+WTHRYYTANKNVTCR
422	sp|Q2KIP2|HASP_BOVIN tr|F1MG77|F1MG77_BOVIN	1	Serine/threonine-protein kinase haspin OS=Bos taurus GN=GSG2 PE=2 SV=1;Serine/threonine-protein kinase haspin OS=Bos taurus GN=GSG2 PE=4 SV=1	11.9	9	0.002	3	0.16	0.04	0.35	0.07	0.457143	0.15	0.05	0.3	0.03	DEDLFMGQGDYQFEIYRLMR+DLHWGNVLLK+ELVGRRLESPGLSGR+GCKGGIASGKSNGPER+LAHQAQASLR+SALFSFLDPGNPEDSELGTDGK
423	sp|Q2KIQ5|T23O_BOVIN tr|L8J1J6|L8J1J6_9CETA	1	Tryptophan 2,3-dioxygenase OS=Bos taurus GN=TDO2 PE=2 SV=1;Tryptophan 2,3-dioxygenase OS=Bos mutus GN=TDO2 PE=3 SV=1	20.2	11	0.003	3	0.13	0.02	0.3	0.07	0.433333	0.19	0.11	0.32	0.05	DERNMLK+DNELLLK+EEQMAEFQKQK+EIFQNGHVR+MLGSKAGTGGSSGYQYLR+NMLKVITR+NMLKVITRMHR+TLLQLVEAWLER+WRYNHVCLVHRMLGSK
424	sp|Q2KIT4|DNJB4_BOVIN tr|L8I253|L8I253_9CETA	1	DnaJ homolog subfamily B member 4 OS=Bos taurus GN=DNAJB4 PE=2 SV=1;DnaJ-like protein subfamily B member 4 (Fragment) OS=Bos mutus GN=M91_13287 PE=4 SV=1	25.8	14	0.006	10	0.22	0.02	0.25	0.02	0.88	0.24	0.02	0.26	0.01	DGSNIIYTAK+DGSNIIYTAKISLR+DRNSVGPSR+EALCGCSINVPTMDGR+NSVGPSRLK+RMGGGRDSDEMEVDGDPFGAFGFSMNGYPR+TIPMTINDIVKPGMR+TIPMTINDIVKPGMRR
425	sp|Q2KIZ8|MCM6_BOVIN tr|E1BH89|E1BH89_BOVIN	1	DNA replication licensing factor MCM6 OS=Bos taurus GN=MCM6 PE=2 SV=1;DNA helicase OS=Bos taurus GN=MCM6 PE=3 SV=2	25.7	19	0.006	11	0.16	0.02	0.33	0.02	0.484848	0.15	0.03	0.29	0.03	DGSGVTKSSWR+DLSYRLVFLACCVAPTNPR+DVEQQFK+EAFRLLNKSIIR+GSIPRSLEVILR+GVLLMLFGGVPKTTGEGTSLR+IQETQAELPR+LSTPGARAETDSR+LVFLACCVAPTNPR+QNINLSAPIMSR+QRDGSGVTK+RIVDLHSRIEDSIDR+SQFLKHVEEFSPRAVYTSGK+TSILAAANPISGHYDRSK+TSILAAANPISGHYDRSKSLK+TTGEGTSLR+VYSLDEIRRYLLFAR
426	sp|Q2KJ16|PHKG2_BOVIN tr|L8IXM6|L8IXM6_9CETA	1	Phosphorylase b kinase gamma catalytic chain, liver/testis isoform OS=Bos taurus GN=PHKG2 PE=2 SV=1;Phosphorylase b kinase gamma catalytic chain, testis/liver isoform OS=Bos mutus GN=M91_10826 PE=4 SV=1	20.9	20	0.005	7	0.2	0.02	0.26	0.03	0.769231	0.24	0.02	0.26	0.04	DLISRLLQVDPVER+DLKPENILLDDNMQIR+DVIGRGVSSVVRR+IRPLTKSALLR+LSDFGFSCHLEPGEKLR+LTAEQALQHPFFER
427	sp|Q2KJ21|CACO1_BOVIN tr|F1N037|F1N037_BOVIN tr|L8I8B9|L8I8B9_9CETA	1	Calcium-binding and coiled-coil domain-containing protein 1 OS=Bos taurus GN=CALCOCO1 PE=2 SV=1;Calcium-binding and coiled-coil domain-containing protein 1 OS=Bos taurus GN=CALCOCO1 PE=4 SV=1;Calcium-binding and coiled-coil domain-containing protein 1 OS=Bos mutus GN=M91_05581 PE=4 SV=1	28.5	25	0.008	7	0.16	0.04	0.3	0.04	0.533333	0.18	0.03	0.31	0.03	AALLGEELASAAGAR+AGLLQSVEAEKDK+DRTIAELHR+DSSLVQLSESKRELTELR+ELTELRSALRVLQK+EQLRGAQELAASSQQK+EVQADKEQSEAELQMAQQENR+GGVNFLNVAR+LEKAVQEEK+LEKVADEK+MEESSLSRAPSR+MEESSLSRAPSRGGVNFLNVAR+QEEQSAQAQR+QELLEYMR+SQVQELEKALAAARQEHAELAEQYK+TQSQVFKTELAR
428	sp|Q2KJ37|ERD22_BOVIN	1	ER lumen protein-retaining receptor 2 OS=Bos taurus GN=KDELR2 PE=2 SV=1	19.8	24	0.005	8	0.19	0.01	0.31	0.01	0.612903	0.18	0.02	0.31	0.01	IWKTRSCAGISGK+LTGDLSHLAAIVILLLKIWKTR+TRSCAGISGK+TRSCAGISGKSQLLFALVFTTR
429	sp|Q2KJ56|HOME1_BOVIN tr|L8HPT0|L8HPT0_9CETA	1	Homer protein homolog 1 OS=Bos taurus GN=HOMER1 PE=2 SV=1;Homer protein-like protein 1 (Fragment) OS=Bos mutus GN=M91_15738 PE=4 SV=1	32.7	13	0.003	5	0.14	0.03	0.3	0.03	0.466667	0.19	0.03	0.33	0.02	AHVFQIDPNTKKNWVPTSK+DLEGQLSDLEQR+DSLTQKLQEVEIR+EEEIERLKQEIDNAR+IFELTELRDNLAK+LTAALLESTANVK+NKDLEGQLSDLEQR+NKDLEGQLSDLEQRLEK+NVYRIISLDGSK+NWVPTSKHAVTVSYFYDSTR
430	sp|Q2KJ61|ELP3_BOVIN tr|L8ICM8|L8ICM8_9CETA	1	Elongator complex protein 3 OS=Bos taurus GN=ELP3 PE=2 SV=2;Elongator complex protein 3 (Fragment) OS=Bos mutus GN=M91_10607 PE=4 SV=1	27.8	14	0.003	2	0.07	0.04	0.46	0.05	0.152174	0.08	0.03	0.36	0.04	DILLGLLR+DIPMPLVSSGVEHGNLR+EEHGSGKIAVISGVGTR+ELAFARMKDLGIQCR+ELHVYGSVVPVSSR+FQHQGFGMLLMEEAER+GDLSPAQLMMLTIGDVIK+ILALVPPWTR+QLIEAHEQGKDIDLNKVK+TREVGIQEIHHK+TRTAAKYGLSAQPR
431	sp|Q2KJ84|TMED5_BOVIN tr|L8IM16|L8IM16_9CETA	1	Transmembrane emp24 domain-containing protein 5 OS=Bos taurus GN=TMED5 PE=2 SV=1;Transmembrane emp24 domain-containing protein 5 (Fragment) OS=Bos mutus GN=M91_06375 PE=3 SV=1	7.5	5	0.002	5	0.15	0.03	0.27	0.04	0.555556	0.17	0.03	0.37	0.02	LSKSGHIQTLLR+SGHIQTLLRAFEAR
432	sp|Q2KJA2|ABCF2_BOVIN tr|L8HUT4|L8HUT4_9CETA	1	ATP-binding cassette sub-family F member 2 OS=Bos taurus GN=ABCF2 PE=2 SV=1;ATP-binding cassette sub-family F member 2 (Fragment) OS=Bos mutus GN=M91_18750 PE=3 SV=1	16.3	2	0.001	0	-9	-9	-9	-9	1	-9	-9	-9	-9	DFSGGWRMRVALAR+EKTLQKMMASGLTER+ELEDFEMKKAAAR+IIGRYGLTGK+ILHGLGFTPAMQR+LELEENQMKR+LLTGELLPTDGMIR+TLQKMMASGLTER+TPLQCVMEVDTER
433	sp|Q2KJA6|INT9_BOVIN tr|F1MMA6|F1MMA6_BOVIN tr|L8HX69|L8HX69_9CETA	1	Integrator complex subunit 9 OS=Bos taurus GN=INTS9 PE=2 SV=1;Integrator complex subunit 9 OS=Bos taurus GN=INTS9 PE=4 SV=1;Integrator complex subunit 9 (Fragment) OS=Bos mutus GN=M91_15875 PE=4 SV=1	7.3	3	0.002	3	0.21	0.03	0.26	0.04	0.807692	0.25	0.03	0.26	0.04	DAVEVSTWRR+HYPSIHGDFSNDFR+LNFIQVSKLLK+QPCVVFTGHPSLR
434	sp|Q2KJC3|MPEG1_BOVIN tr|L8HXW0|L8HXW0_9CETA	1	Macrophage-expressed gene 1 protein OS=Bos taurus GN=MPEG1 PE=2 SV=2;Macrophage-expressed 1 protein OS=Bos mutus GN=M91_21540 PE=4 SV=1	14.6	7	0.002	3	0.2	0.02	0.28	0.05	0.714286	0.16	0.04	0.34	0.02	DLGAPSLR+INPDAELSLGFKK+KALMDISEQLENNQTR+LPVLPVLPGGGWDNLR+NVDTGRVMELAYSHCR+SAVTASAGITFLNIVNFK+TTEDGQYIVPDEIFTIPQK
435	sp|Q2KJD8|CDN2B_BOVIN tr|F1N340|F1N340_BOVIN	1	Cyclin-dependent kinase 4 inhibitor B OS=Bos taurus GN=CDKN2B PE=2 SV=1;Cyclin-dependent kinase 4 inhibitor B OS=Bos taurus GN=CDKN2B PE=4 SV=1	59.5	12	0.003	2	0.13	0.03	0.27	0	0.481481	0.2	0.12	0.36	0.1	EGFLDTLVALHRAGGR+LNRFGRRPIQVMMMGSAR+LPVDLAEERGHR+LPVDLAEERGHRDVAR+MLSGGGGDADLANAAAR+QLLEAGVDPNR+QLLEAGVDPNRLNRFGR
436	sp|Q2KJD9|ELOV5_BOVIN	1	Elongation of very long chain fatty acids protein 5 OS=Bos taurus GN=ELOVL5 PE=2 SV=1	3.7	11	0.004	7	0.16	0.01	0.31	0.02	0.516129	0.2	0.01	0.32	0.01	SGGEADMK+SGGEADMKIIR
437	sp|Q2KJF7|GLCTK_BOVIN tr|E1BK74|E1BK74_BOVIN tr|L8IGS1|L8IGS1_9CETA	1	Glycerate kinase OS=Bos taurus GN=GLYCTK PE=2 SV=1;Glycerate kinase OS=Bos taurus GN=GLYCTK PE=4 SV=2;Glycerate kinase OS=Bos mutus GN=M91_21126 PE=4 SV=1	20	18	0.005	9	0.19	0.02	0.27	0.03	0.703704	0.2	0.03	0.28	0.03	ALSLDPDSGELKVR+GGRNQELALR+LQGSGKGGRNQELALR+MAAALQVLRHLAR+QAEALGYRAVVLSTAIQGDVK+QEMLLKPHSR+QLFESTVGAVLPGPLLQRALSLDPDSGELK+TALPRSVK
438	sp|Q2KJG8|BCKD_BOVIN tr|L8J5D0|L8J5D0_9CETA	1	[3-methyl-2-oxobutanoate dehydrogenase [lipoamide]] kinase, mitochondrial OS=Bos taurus GN=BCKDK PE=2 SV=1;[3-methyl-2-oxobutanoate dehydrogenase [lipoamide]] kinase, mitochondrial OS=Bos mutus GN=M91_19518 PE=4 SV=1	29.9	17	0.004	7	0.23	0.03	0.28	0.03	0.821429	0.2	0.01	0.27	0.01	DQADEAR+DVVTLLAEGLR+DVVTLLAEGLRESR+FPFIPMPLDYILPELLKNAMR+GGGIAHKDLDR+INGHVAAR+ISDRGGGIAHKDLDR+LQSLQGIGTDVYLRLRHIDGR+MILASVLGSGPRGGPPLRPLLGPALSLR+TLTSRLGIR
439	sp|Q2KJH6|SERPH_BOVIN tr|L8I5Y3|L8I5Y3_9CETA	1	Serpin H1 OS=Bos taurus GN=SERPINH1 PE=2 SV=1;Serpin H1 OS=Bos mutus GN=M91_10013 PE=3 SV=1	30.6	8	0.003	3	0.16	0.04	0.31	0.03	0.516129	0.24	0.02	0.27	0.03	AATASQAKAVLSAEQLR+AATLAERSAGLAFSLYQAMAK+AVLSAEQLRDDEVHAGLGELLR+DDEVHAGLGELLRSLSNSTAR+DTQSGSLLFIGR+GVVEVTHDLQK+LQMVEMPLAHK+SALQSINEWAAQTTDGK+SLSNSTARNVTWK+TGLYNYYDDEKEK
440	sp|Q2KJI3|FA49B_BOVIN tr|L8IA39|L8IA39_9CETA	1	Protein FAM49B OS=Bos taurus GN=FAM49B PE=2 SV=1;Protein FAM49B OS=Bos mutus GN=M91_03450 PE=4 SV=1	28.7	45	0.016	37	0.13	0.01	0.32	0.01	0.40625	0.17	0.01	0.36	0.01	AWGAVVPLVGKLKK+DQPPNSVEGLLNALR+HLNDETTSKQIK+IDMKGCIKVLK+INNVPAEGENEVNNELANR+RTLSRMR+VLKDQPPNSVEGLLNALRYTTK+VMLETPEYRSR
441	sp|Q2KJJ0|PRP6_BOVIN tr|L8HUJ3|L8HUJ3_9CETA	1	Pre-mRNA-processing factor 6 OS=Bos taurus GN=PRPF6 PE=2 SV=1;Pre-mRNA-processing factor 6 (Fragment) OS=Bos mutus GN=M91_13203 PE=4 SV=1	30.1	24	0.008	11	0.12	0.02	0.34	0.03	0.352941	0.18	0.03	0.31	0.02	AGSVATCQAVMR+AGSVATCQAVMRAVIGIGIEEEDR+ARSSAPTARVFMK+AVAHCPKAEVLWLMGAK+DIANWQRKIGEILVLVAAR+HGELWCATSKDIANWQR+HTWMEDADSCVAHNALECAR+KCPHSTPLWLLLSR+KIGEILVLVAAR+KIGEILVLVAARIK+KPFLGMPAPLGYVPGLGR+KPFLGMPAPLGYVPGLGRGATGFTTRSDIGPAR+LEEANGNTQMVEK+LEYRAGLK+LEYRAGLKNIASTLMAK+LLAKARSSAPTAR+LQPGDTAKAVVAQAVR+LQVARNLIMKGTEMCPK+LSQVSDSVSGQTVVDPK+NLIMKGTEMCPKSEDVWLEAAR+NPKNPGLWLESVR+NTLMDMR+SDIGPARDANDPVDDR+TKSV…
442	sp|Q2M2S6|HPIP_BOVIN tr|L8J2I2|L8J2I2_9CETA tr|M5FHS9|M5FHS9_BOVIN	1	Host cell factor C1 regulator 1 OS=Bos taurus GN=HCFC1R1 PE=3 SV=1;Host cell factor C1 regulator 1 OS=Bos mutus GN=M91_18784 PE=4 SV=1;Host cell factor C1 regulator 1 OS=Bos taurus GN=HCFC1R1 PE=4 SV=1	54.6	3	0.001	2	0.17	0.04	0.27	0.02	0.62963	0.19	0	0.36	0.06	AFPPALPPLRSPCSELLLWR+GPQGRAQR+LSLHNDHPYCSPPR+MILQQPLERGPQGR+QFLSEENMATHFSR
443	sp|Q2M2T7|RT24_BOVIN tr|L8I075|L8I075_9CETA	1	28S ribosomal protein S24, mitochondrial OS=Bos taurus GN=MRPS24 PE=1 SV=1;28S ribosomal protein S24, mitochondrial OS=Bos mutus GN=M91_17832 PE=4 SV=1	19.2	5	0.002	5	0.14	0.02	0.35	0.01	0.4	0.2	0.02	0.3	0.03	DLPCIWRALHTSAVCFKNR+RANQVEICALVLR
444	sp|Q2NKZ1|TCPH_BOVIN tr|F1MWR8|F1MWR8_BOVIN tr|L8I7D0|L8I7D0_9CETA	1	T-complex protein 1 subunit eta OS=Bos taurus GN=CCT7 PE=1 SV=1;T-complex protein 1 subunit eta (Fragment) OS=Bos taurus GN=CCT7 PE=3 SV=2;T-complex protein 1 subunit eta (Fragment) OS=Bos mutus GN=M91_12369 PE=3 SV=1	35.6	12	0.004	2	0.2	0.02	0.27	0.03	0.740741	0.15	0	0.38	0.05	AFRTATQLAVNK+AIKNDSVVAGGGAIEMELSKYLR+DMFCAGR+GGAEQFMEETERSLHDAIMIVR+LNKIRAR+MVVDAVMMLDDLLQLK+MVVDAVMMLDDLLQLKMIGIK+NDSVVAGGGAIEMELSKYLR+NPRSTVDASPAAGR+NPRSTVDASPAAGRGR+QLCDNAGFDATNILNK+QVKPYVEEGLHPQIIIR+STVDASPAAGRGR+TMMACGGSIQTSVNALSSDVLGR+TTLGPRGMDKLIVDGR+YNFFTGCPKAKTCTIILR
445	sp|Q2NL14-2|KANL2_BOVIN sp|Q2NL14|KANL2_BOVIN	1	Isoform 2 of KAT8 regulatory NSL complex subunit 2 OS=Bos taurus GN=KANSL2;KAT8 regulatory NSL complex subunit 2 OS=Bos taurus GN=KANSL2 PE=2 SV=1	20.7	10	0.003	4	0.14	0.04	0.35	0.05	0.4	0.22	0.04	0.25	0.02	IHVLPTNR+IRIHVLPTNRGR+MNRIRIHVLPTNR+NALALHAQMKK+RMLATDGAAQQAHTTR+TELGSQTPESSRSEASR+YRQRYGVEALLHR
446	sp|Q2NL16|FBX28_BOVIN tr|L8I2Y2|L8I2Y2_9CETA	1	F-box only protein 28 OS=Bos taurus GN=FBXO28 PE=2 SV=1;F-box only protein 28 (Fragment) OS=Bos mutus GN=M91_07375 PE=4 SV=1	27.7	5	0.002	1	0.2	99.99	0.27	99.99	0.740741	0.2	99.99	0.33	99.99	DISSMAMEYFDEKIVPILK+EVMESAVGNSSGSGQSEESPR+EVMESAVGNSSGSGQSEESPRK+IVPILKR+LQQQVKTNGAGVTVLRR+LSLLNMTFMK+RMDLVCQR
447	sp|Q2NL21|DJC11_BOVIN tr|L8IT04|L8IT04_9CETA	1	DnaJ homolog subfamily C member 11 OS=Bos taurus GN=DNAJC11 PE=2 SV=1;DnaJ-like protein subfamily C member 11 (Fragment) OS=Bos mutus GN=M91_04531 PE=4 SV=1	14.9	8	0.003	4	0.16	0.04	0.33	0	0.484848	0.22	0.02	0.27	0.04	ISRHSVLGAAVSIGVPQGVSLKIK+IYDIYGK+LMQESVR+NTVGYLQWR+QEAEAAVRLMQESVR+VTSAKGWGELEFGAGDLQGPLFGLK
448	sp|Q2NL37|BCCIP_BOVIN tr|L8I6S4|L8I6S4_9CETA	1	BRCA2 and CDKN1A-interacting protein OS=Bos taurus GN=BCCIP PE=2 SV=1;BRCA2 and CDKN1A-interacting protein (Fragment) OS=Bos mutus GN=M91_11571 PE=4 SV=1	18.1	7	0.003	5	0.16	0.04	0.33	0.06	0.484848	0.15	0.03	0.3	0.04	CYFYLLISKTFVEAGKSNSK+GTPCAEQIKELILR+NCEKSMVEQLDR+TFVEAGKSNSKK
449	sp|Q2T9N1|F1142_BOVIN tr|F1N189|F1N189_BOVIN	1	Protein FAM114A2 OS=Bos taurus GN=FAM114A1 PE=2 SV=1;Uncharacterized protein OS=Bos taurus GN=FAM114A2 PE=4 SV=1	19.6	7	0.002	2	0.14	0.09	0.27	0.07	0.518519	0.31	0.13	0.2	0.11	AETSLGIPSPSEISTEVQYATGETSAK+DDLETAVITEATPIR+KTMDVIAEGDPGFKR+LARARNTAYEWIR+RTKGLMNR+SESKSEPVASTR+TKGLMNRTSTLSQVLR
450	sp|Q2T9N4|PMF1_BOVIN	1	Polyamine-modulated factor 1 OS=Bos taurus GN=PMF1 PE=2 SV=1	24.9	8	0.003	5	0.19	0.04	0.31	0.03	0.612903	0.17	0.02	0.29	0.04	DALQRRVQR+DLRSAMAPYLLQQR+DLRSAMAPYLLQQRDALQR+MAEASSVNVGSGCAEK+QLEELQLQAQAR
451	sp|Q2T9S4|PGP_BOVIN tr|M5FJY9|M5FJY9_BOVIN	1	Phosphoglycolate phosphatase OS=Bos taurus GN=PGP PE=2 SV=1;Phosphoglycolate phosphatase OS=Bos taurus GN=PGP PE=4 SV=1	33.3	13	0.005	6	0.2	0.02	0.26	0.02	0.769231	0.24	0.02	0.28	0.03	DVKSNQESDCMAK+EAYAEKLRCLGFGAPAGPDAGR+GETAVPGAPETLTALRAR+LAFITNNSSK+LPLENGRFIAGTGCLVR+LRCLGFGAPAGPDAGR+MAEAEAGGDDGR+MAEAEAGGDDGRCVR+QADIIGKPSR+TREAYAEKLR
452	sp|Q2T9U1|SRP54_BOVIN tr|L8IVN8|L8IVN8_9CETA	1	Signal recognition particle 54 kDa protein OS=Bos taurus GN=SRP54 PE=2 SV=1;Signal recognition particle 54 kDa protein OS=Bos mutus GN=M91_01762 PE=3 SV=1	48.2	16	0.005	6	0.19	0.02	0.31	0.02	0.612903	0.21	0.02	0.26	0.03	DKVDVASVIVTK+DKVDVASVIVTKLDGHAK+EVCTALLEADVNIK+GGDMSKNVSQSQMAK+GGDMSKNVSQSQMAKLNQQMAK+GSGVSTRDVQELLTQYTKFAQMVK+KLMTIMDSMNDQELDSTDGAK+KMGGIKGLFK+LDDNEALIEKLK+LDGHAKGGGALSAVAATK+LMTIMDSMNDQELDSTDGAKVFSKQPGR+MVLADLGRKITSALR+NVSQSQMAKLNQQMAKMMDPR+QFQQGAAGNMK+QFQQGAAGNMKGMMGFNNM+QNVIMFVGLQGSGK+SAIDLEEMASGLNKR+TCLICADTFRAGAFDQLK+VLHHMGGMAGLQSMMR
453	sp|Q2T9W0|BACD1_BOVIN tr|F1N648|F1N648_BOVIN tr|L8HPB2|L8HPB2_9CETA	1	BTB/POZ domain-containing adapter for CUL3-mediated RhoA degradation protein 1 OS=Bos taurus GN=KCTD13 PE=2 SV=1;BTB/POZ domain-containing adapter for CUL3-mediated RhoA degradation protein 1 OS=Bos taurus GN=KCTD13 PE=4 SV=1;BTB/POZ domain-containing adapter for CUL3-mediated RhoA degradation protein 1 OS=Bos mutus GN=M91_01258 PE=4 SV=1	27.7	10	0.003	4	0.21	0.04	0.27	0.03	0.777778	0.19	0.01	0.31	0.01	DGSVPLPESTRELGELLGEAR+GPDPALLEATGGAAGGGGASR+LKAMFSGR+LLHNRSNNK+NIELFDKLALR+TLTGQDTRLK+TLTGQDTRLKAMFSGR+YSYTSTSDDNLLK
454	sp|Q2T9W8|ANR61_BOVIN	1	Ankyrin repeat domain-containing protein 61 OS=Bos taurus GN=ANKRD61 PE=2 SV=1	39.2	65	0.019	28	0.2	0.01	0.28	0.01	0.714286	0.2	0.01	0.3	0.01	DHDGQAAIHEACFGGR+DTALLARLLFRSYPLR+GSKGRAADGPK+GSNIRDTALLAR+ILCAHGAQVNAR+IQTMLTDVQRNAVLCLR+LAVSTASSKAGR+LAVSTASSKAGRLLAAGLGCIR+LFLSQETLSFLPIHLAAK+LLLVHGAQVNAR+NGESPIHMYLQRGSNIRDTALLAR+NIYGEKHKQLLK+NKIQTMLTDVQR+QDCAALRALLR
455	sp|Q2T9W9|CAAP1_BOVIN tr|L8HZY5|L8HZY5_9CETA	1	Caspase activity and apoptosis inhibitor 1 OS=Bos taurus GN=CAAP1 PE=2 SV=1;Uncharacterized protein OS=Bos mutus GN=M91_17947 PE=4 SV=1	33.7	4	0.002	2	0.2	0.02	0.28	0	0.714286	0.15	0.04	0.37	0.01	AIKALMKAGDIK+ALMKAGDIKKPA+DIEKSVNEILGLAESSPK+EPKAATLTVPPPEDVQPSAQQLELLELEMRAR+ILKILEGDNGMDSEMEEEADDGSK+KILKILEGDNGMDSEMEEEADDGSK+MLPDVLKNCSIEEIK+QCFCIIGEK+QPEGLELK+SVNEILGLAESSPKEPK
456	sp|Q2T9X8|SPICE_BOVIN tr|F1MIU6|F1MIU6_BOVIN tr|L8I2V9|L8I2V9_9CETA	1	Spindle and centriole-associated protein 1 OS=Bos taurus GN=SPICE1 PE=2 SV=1;Spindle and centriole-associated protein 1 OS=Bos taurus GN=SPICE1 PE=4 SV=1;Spindle and centriole-associated protein 1 OS=Bos mutus GN=M91_07944 PE=4 SV=1	19.4	12	0.004	2	0.25	0.05	0.39	0.14	0.641026	0.11	0.05	0.21	0.04	AHLNNIIGPGGEQGDGLR+EILSDQYQLQDVLEK+IAELNRQSMEARGK+LTPLNPR+NCPVISNKESQALERGATSQR+NPTLSEEPLVLGDGQQLR+NPTLSEEPLVLGDGQQLRTNETLIQR+QEWDNTVTDLTVHR+QEWDNTVTDLTVHRATPEDLIR+QKPEISNLEKR+QSMEARGKLLQLIEQQK+SDHLMATAK+TNETLIQR+TNETLIQRKDIMAR+TVQTRPAPR
457	sp|Q2T9Y0|RSRC1_BOVIN tr|L8HX54|L8HX54_9CETA	1	Serine/Arginine-related protein 53 OS=Bos taurus GN=RSRC1 PE=2 SV=1;Serine/Arginine-related protein 53 (Fragment) OS=Bos mutus GN=M91_07356 PE=4 SV=1	28.3	8	0.002	3	0.16	0.02	0.31	0.06	0.516129	0.22	0.04	0.29	0.01	ARLQLVLEAAAK+DKELHNIK+DKELHNIKR+GESGNIKAGLEHLPPAEQAK+KEEDQTTLVEQVK+SRSRPRPRSHSR
458	sp|Q2T9Z0|TRI17_BOVIN tr|F1MRB0|F1MRB0_BOVIN	1	E3 ubiquitin-protein ligase TRIM17 OS=Bos taurus GN=TRIM17 PE=2 SV=1;E3 ubiquitin-protein ligase TRIM17 OS=Bos taurus GN=TRIM17 PE=4 SV=2	21.5	9	0.003	2	0.15	0.05	0.21	0.17	0.714286	0.39	0.11	0.18	0	DRFLAYPCAVGQEIYSSGR+GSFPCPECR+GSFPCPECRELSPQR+LLTKVAEMVR+NLRPNRLLTK+QQSHSLERLLLQLEDRNEHTPLQMLQDMK+SGQMVISTVTLWVK+SGQMVISTVTLWVKG+VAEMVRQHPSPQSR
459	sp|Q2T9Z2|CT195_BOVIN tr|L8HNY8|L8HNY8_9CETA	1	Uncharacterized protein C20orf195 homolog OS=Bos taurus PE=2 SV=1;Uncharacterized protein OS=Bos mutus GN=M91_04658 PE=4 SV=1	27.6	12	0.004	3	0.17	0.01	0.34	0.05	0.5	0.15	0.03	0.33	0.01	KESVAHQDWVSLR+LADLSAVMDSFLAMMVPGR+LMLSTKMPVMFDRK+LVSDIGATK+LVSDIGATKIPHIR+NLLPNRAYK+VGAAQTKIQLLLLGDLLEQLDHGR
460	sp|Q2T9Z6|CC175_BOVIN tr|L8I5Z6|L8I5Z6_9CETA	1	Coiled-coil domain-containing protein 175 OS=Bos taurus GN=CCDC175 PE=2 SV=2;Uncharacterized protein (Fragment) OS=Bos mutus GN=M91_05626 PE=4 SV=1	21.7	16	0.005	6	0.18	0.02	0.29	0.03	0.62069	0.18	0.02	0.33	0.03	DARRVNLVEMSELHTK+DEIKELIDK+ENFLSKR+IKDEIKELIDK+INLEKKELELQK+IVLNEEDK+KKILHLQTDNTALGER+KLIQELSKFEQR+LDDSSNFEKSELLLK+LRLTMTKMR+LTMTKMR+NEQNLLNNNISQFTRDFIR+NFLKDVAIAVK+QYKIVLNEEDK+TDALILENK+TKAHFEILK
461	sp|Q2TA08|BAG5_BOVIN tr|L8I492|L8I492_9CETA	1	BAG family molecular chaperone regulator 5 OS=Bos taurus GN=BAG5 PE=2 SV=1;BAG family molecular chaperone regulator 5 (Fragment) OS=Bos mutus GN=M91_04953 PE=4 SV=1	11.2	9	0.003	6	0.18	0.01	0.29	0.01	0.62069	0.22	0.01	0.3	0.01	GTLIALLMGVNNK+INSVMCEVNK+INSVMCEVNKTR+NPCIREAR+TELQGLIGQLDEVSLEKNPCIR
462	sp|Q2TA43|ACTT2_BOVIN	1	Actin-related protein T2 OS=Bos taurus GN=ACTRT2 PE=2 SV=1	23.1	6	0.002	1	0.06	99.99	0.35	99.99	0.171429	0.28	99.99	0.31	99.99	AGLSGEIGPRHVVSSVVGHPKFK+DITEHLTRLLLASGR+EKLCYVALEPDKELCR+ELEQLASKGTPIK+QMWVTSADFKEFGTSVIQRR
463	sp|Q2TBG8|UCHL3_BOVIN tr|L8IW61|L8IW61_9CETA	1	Ubiquitin carboxyl-terminal hydrolase isozyme L3 OS=Bos taurus GN=UCHL3 PE=2 SV=1;Ubiquitin carboxyl-terminal hydrolase OS=Bos mutus GN=M91_15797 PE=3 SV=1	30.4	5	0.002	3	0.18	0.02	0.38	0.03	0.473684	0.19	0.01	0.24	0.04	DKMHFESGSTLKK+KFLEESASMSPEERAR+MHFESGSTLKK+QTISNACGTIGLIHAIANNKDK+TEEEEKIK+TEEEEKIKSQGQDVTSSVYFMK
464	sp|Q2TBK0|CF163_BOVIN tr|L8I6N2|L8I6N2_9CETA	1	Uncharacterized protein C6orf163 homolog OS=Bos taurus PE=2 SV=1;Uncharacterized protein OS=Bos mutus GN=M91_07406 PE=4 SV=1	53.2	11	0.004	5	0.17	0.02	0.3	0.03	0.566667	0.27	0.01	0.23	0.04	ALEEANDMYKMQIQFLK+AMEELMSSGVTVVK+EKQHEMNLYYCMTQR+EKVQAVQEAR+ELKEMATRTK+EQERLMAQEEIQSQRR+ERIAQAEADIWAKADER+IHEYKPFKTR+IIPPAPFGETFK+IIPPAPFGETFKR+IMMECHR+KAMEELMSSGVTVVK+LEEEIQR+LGSVMDKLVNTQGELLSIAK+LMAQEEIQSQRR+MVHRIQRIMMECHR+QEEVQEVLQEAEKTHQAK+QEEVQEVLQEAEKTHQAKLGSVMDK
465	sp|Q2TBR0|PCCB_BOVIN	1	Propionyl-CoA carboxylase beta chain, mitochondrial OS=Bos taurus GN=PCCB PE=2 SV=1	29.1	25	0.008	12	0.16	0.03	0.27	0.02	0.592593	0.17	0.02	0.35	0.02	EFFEIMPNYAKNIIVGFARMNGR+FPGDSVVTGRGR+FPGDSVVTGRGRINGR+GAGRSLCTQPVSVNER+IQEGVESLAGYADIFLR+LLYAFAEATVPKVTVITRK+LSVVLRSLRGAGR+MAAAMRVAVAGAR+MAAAMRVAVAGARLSVVLR+NIIVGFARMNGR+NKFPGDSVVTGR+NKFPGDSVVTGRGR+QAALLGGGQR+SLRGAGRSLCTQPVSVNER+SVTNEDVTQEELGGAR+VASGCLDINSSVK+VASGCLDINSSVKGAR
466	sp|Q2TBS9|SMU1_BOVIN tr|L8I6B6|L8I6B6_9CETA	1	WD40 repeat-containing protein SMU1 OS=Bos taurus GN=SMU1 PE=2 SV=1;WD40 repeat-containing protein SMU1 OS=Bos mutus GN=M91_04148 PE=4 SV=1	34.3	16	0.005	7	0.19	0.01	0.29	0.02	0.655172	0.2	0.02	0.3	0.02	DTEMLATGAQDGK+DTEMLATGAQDGKIK+DVEEEKFPTQLSR+EAYPDGSSKEK+ELGAARSLLRQTDPMIMLK+IHGLKSGK+IQSGQCLRR+LMALLGQALK+QTDPMIMLKQTQPER+QTQPERYIHLENLLAR+REGGDFVCCALSPR+SLGSTAGTDITVNSVILLPK+SNTVVIMNMQGQIVR+SNTVVIMNMQGQIVRSFSSGK+WQQHQGLLPPGMTIDLFRGK
467	sp|Q2TBT3|ECHD2_BOVIN tr|L8IL76|L8IL76_9CETA	1	Enoyl-CoA hydratase domain-containing protein 2, mitochondrial OS=Bos taurus GN=ECHDC2 PE=2 SV=1;Enoyl-CoA hydratase domain-containing protein 2, mitochondrial OS=Bos mutus GN=M91_12078 PE=3 SV=1	19.6	5	0.002	2	0.2	0.01	0.3	0	0.666667	0.19	0.01	0.31	0	ALAQEILPQAPIAVR+EQMSEAEVGLFVQR+EREQMSEAEVGLFVQRLR+LEGMAAFR+LEGMAAFREKR+SGVKGVFCAGADLK
468	sp|Q2TBT7|FXR1_BOVIN tr|A6QLG6|A6QLG6_BOVIN tr|F1N4M9|F1N4M9_BOVIN tr|L8IRL5|L8IRL5_9CETA	1	Fragile X mental retardation syndrome-related protein 1 OS=Bos taurus GN=FXR1 PE=2 SV=1;FXR1 protein OS=Bos taurus GN=FXR1 PE=2 SV=1;Fragile X mental retardation syndrome-related protein 1 OS=Bos taurus GN=FXR1 PE=4 SV=1;Fragile X mental retardation syndrome-related protein 1 (Fragment) OS=Bos mutus GN=M91_09237 PE=4 SV=1	22.6	13	0.004	6	0.16	0.01	0.27	0.05	0.592593	0.16	0.04	0.35	0.02	EDLMGLAIGTHGSNIQQAR+EISEGDEVEVYSR+EVEQLRMERLQIDEQLR+GGKSSISSVLK+IEGDNENK+KVPGVTAIELDEDTGTFR+LRPVNQNKTVK+MERLQIDEQLR+NLVGKVIGKNGK+RPGGRGRSVSGGR
469	sp|Q2TBX2|PFD3_BOVIN tr|G5E5K1|G5E5K1_BOVIN tr|L8IET6|L8IET6_9CETA	1	Prefoldin subunit 3 OS=Bos taurus GN=VBP1 PE=2 SV=1;Prefoldin subunit 3 OS=Bos taurus GN=VBP1 PE=4 SV=1;Prefoldin subunit 3 OS=Bos mutus GN=M91_13583 PE=4 SV=1	15.2	5	0.002	3	0.14	0.02	0.36	0.04	0.388889	0.12	0.05	0.35	0.04	DGCGVGEVAAGNGR+DGCGVGEVAAGNGRR+KESTSSLETR+MAASKDGCGVGEVAAGNGRR
470	sp|Q2TLZ3|MACOI_BOVIN tr|L8II87|L8II87_9CETA	1	Macoilin OS=Bos taurus GN=TMEM57 PE=2 SV=1;Macoilin (Fragment) OS=Bos mutus GN=M91_13383 PE=4 SV=1	31	14	0.004	4	0.12	0.03	0.23	0.06	0.521739	0.31	0.07	0.27	0.06	DKQNISQLEK+DLKQKIAEVMAVMPSITYSAAASPLSPVSPHYSSK+DTEVLMSALSAMQDK+DTEVLMSALSAMQDKTQHLENSLSAETR+EDSCTASSK+LDLFSALGDAK+LEEATAARAVAFAAASR+LHNAVQMKQK+LHNAVQMKQKDK+LKADLQASR+LKADLQASRQVEQELR+LSTTLPEIEYREK+LTMDMKVK+NASGVVNSSPR+NYKNASGVVNSSPR+QKDKQNISQLEK+QLEIAQGQILQK+QVEQELRSQISSLSSTER+SQISSLSSTERGIR+TQHLENSLSAETRIK
471	sp|Q2YDD0|HSP7E_BOVIN tr|L8INA2|L8INA2_9CETA	1	Heat shock 70 kDa protein 14 OS=Bos taurus GN=HSPA14 PE=2 SV=1;Heat shock 70 kDa protein 14 OS=Bos mutus GN=M91_10662 PE=3 SV=1	23.2	9	0.003	5	0.11	0.04	0.32	0.06	0.34375	0.13	0.06	0.3	0.08	AAGFNVLR+DILVKGVDESGANSFK+ENGLRDILAVLTMKR+LGGTSLSISVMEVNSGIYR+NEEVVGLAAKQSR+NEEVVGLAAKQSRIR+NISNTVMK+NISNTVMKVKQILGR+NSAKVENK+QKSALGEAAR+VVLCGGSSRIPR
472	sp|Q2YDD2|SMG9_BOVIN tr|F1MBJ5|F1MBJ5_BOVIN	1	Protein SMG9 OS=Bos taurus GN=SMG9 PE=2 SV=1;Protein SMG9 OS=Bos taurus GN=SMG9 PE=4 SV=2	23.1	13	0.002	2	0.2	0.08	0.24	0.05	0.833333	0.19	0	0.34	0.03	AQSAEMKERGGNQTSGIDFFITQER+DYIAPWERERR+EPGPGGPQNLSGPGGR+EPGPGGPQNLSGPGGRER+GMGTAAPAAMDPVVGQAKLLPPERMK+NWFHYAAR+QMHLMIDQLMAHSHLR+RDGSEETSTAVMQK+RWKEPGPGGPQNLSGPGGR+WKEPGPGGPQNLSGPGGR
473	sp|Q2YDD9|ADT4_BOVIN tr|A0A060ILH6|A0A060ILH6_9CETA tr|F1MDK8|F1MDK8_BOVIN tr|L8I2G5|L8I2G5_9CETA	1	ADP/ATP translocase 4 OS=Bos taurus GN=SLC25A31 PE=2 SV=1;ADP/ATP translocase 4 OS=Bos mutus GN=SLC25A31 PE=2 SV=1;ADP/ATP translocase 4 OS=Bos taurus GN=SLC25A31 PE=3 SV=1;Uncharacterized protein OS=Bos mutus GN=M91_01152 PE=3 SV=1	43	15	0.004	4	0.2	0.01	0.25	0.02	0.8	0.19	0.05	0.33	0.04	ASYFGAYDTVK+DLLAGGVAAAVSK+DLLAGGVAAAVSKTTVAPIER+DLLNIDIGGSSSGD+EQGFLSYWRGNLANVIR+GTGGALVLVLYDKIK+IYQQEGIGAFFRGAFSNILR+LGADIGKGPEER+QLFMSGVNKEK+QLFMSGVNKEKQFWR+RMMMQSGEAERQYK
474	sp|Q2YDE9|TES_BOVIN tr|L8ICM4|L8ICM4_9CETA	1	Testin OS=Bos taurus GN=TES PE=2 SV=1;Testin (Fragment) OS=Bos mutus GN=M91_16197 PE=4 SV=1	15.7	9	0.003	4	0.14	0.05	0.32	0.1	0.4375	0.16	0.04	0.3	0.03	EVKEMEQFVK+KYKNEALGVGDVK+LKSDGIPMYKR+NHAEVCQGCHNAIDPEVQR+NVMILTNPVAAK+SDGIPMYKR+SDGIPMYKRNVMILTNPVAAK+YKNEALGVGDVK
475	sp|Q2YDF9|PCGF1_BOVIN tr|F1MM90|F1MM90_BOVIN tr|L8HYJ0|L8HYJ0_9CETA	1	Polycomb group RING finger protein 1 OS=Bos taurus GN=PCGF1 PE=2 SV=2;Polycomb group RING finger protein 1 OS=Bos taurus GN=PCGF1 PE=4 SV=1;Polycomb group RING finger protein 1 OS=Bos mutus GN=M91_06127 PE=4 SV=1	20.8	16	0.003	4	0.19	0.01	0.24	0.03	0.791667	0.22	0.02	0.34	0.04	CSVRAEVR+LRNQLQSVYK+LRNQLQSVYKMDPLR+LSSGKDKNK+MASPQGGQIAIAMRLR+NEEEVRVK
476	sp|Q2YDI2|ORC4_BOVIN tr|L8HZ22|L8HZ22_9CETA	1	Origin recognition complex subunit 4 OS=Bos taurus GN=ORC4 PE=2 SV=1;Origin recognition complex subunit 4 (Fragment) OS=Bos mutus GN=M91_21416 PE=4 SV=1	19.9	10	0.003	2	0.12	0.03	0.36	0.02	0.333333	0.14	0.04	0.37	0.04	EVLQKHFNVSKNLR+GSGKTMLINHALK+HFNVSKNLRSLHMLLMLALNR+LDILELLEKR+LDILELLEKRVK+NLRSLHMLLMLALNR+QIHLMNSFSFPQYLK+RTAIHGESNSILIIGPRGSGK
477	sp|Q2YDM2|INT11_BOVIN tr|A7E3Q0|A7E3Q0_BOVIN tr|E1B7Q9|E1B7Q9_BOVIN tr|L8IZH6|L8IZH6_9CETA	1	Integrator complex subunit 11 OS=Bos taurus GN=CPSF3L PE=2 SV=2;Related to CPSF subunits 68 kDa OS=Bos taurus GN=CPSF3L PE=2 SV=1;Integrator complex subunit 11 OS=Bos taurus GN=CPSF3L PE=4 SV=2;Integrator complex subunit 11 OS=Bos mutus GN=M91_10927 PE=4 SV=1	18.1	11	0.003	1	0.25	99.99	0.27	99.99	0.925926	0.22	99.99	0.27	99.99	GGKVLIPVFALGR+ILSGQRKLEMEGR+KEQEMAMR+LEMEGRQVLEVK+LFIPWTNQK+LVSSEQALK+MPEIRVTPLGAGQDVGRSCILVSIAGK+NVMLDCGMHMGFSDDR+VHETVERGGKVLIPVFALGR
478	sp|Q32KP2|LRC23_BOVIN tr|F1N124|F1N124_BOVIN tr|L8HWY9|L8HWY9_9CETA	1	Leucine-rich repeat-containing protein 23 OS=Bos taurus GN=LRRC23 PE=2 SV=1;Leucine-rich repeat-containing protein 23 OS=Bos taurus GN=LRRC23 PE=4 SV=2;Leucine-rich repeat-containing protein 23 OS=Bos mutus GN=M91_17652 PE=4 SV=1	27.8	16	0.006	9	0.13	0.02	0.3	0.02	0.433333	0.2	0.02	0.34	0.02	DLTDIHLLR+DLTDIHLLRSYIHLR+DRDLTDIHLLRSYIHLR+EEQEQEAEVEPESELDQSST+KVEGLENLSNLTTLHLR+NLFLAQNMLKK+SLQYLNLR+SLQYLNLRGNMVADLGELAK+TGNGLAHAYVK
479	sp|Q32KQ1|F228A_BOVIN	1	Protein FAM228A OS=Bos taurus GN=FAM228A PE=2 SV=1	24.5	19	0.005	6	0.16	0.01	0.27	0.03	0.592593	0.21	0.02	0.34	0.02	DRPKAFARPVGSK+DRPKAFARPVGSKTHSK+EFKELEK+IMEKVISYKALEK+MTSDVNQTVFERR+NQTVFER+RLDTYFQHLDAFKER+SWAAGEGQQR+SWAAGEGQQRR+VKMTSDVNQTVFER
480	sp|Q32KV2|MAEL_BOVIN tr|F1MMI4|F1MMI4_BOVIN tr|L8HRU4|L8HRU4_9CETA	1	Protein maelstrom homolog OS=Bos taurus GN=MAEL PE=2 SV=1;Protein maelstrom homolog OS=Bos taurus GN=MAEL PE=4 SV=1;Protein maelstrom-like protein OS=Bos mutus GN=M91_13684 PE=4 SV=1	8.6	10	0.004	6	0.18	0.02	0.34	0.01	0.529412	0.17	0.02	0.3	0.03	ISGQNSSVR+ISGQNSSVRGR+NAYYFFVQEK+VNWCLKHMAKSSEIR
481	sp|Q32KY1-2|DRC1_BOVIN sp|Q32KY1|DRC1_BOVIN	1	Isoform 2 of Dynein regulatory complex protein 1 OS=Bos taurus GN=DRC1;Dynein regulatory complex protein 1 OS=Bos taurus GN=DRC1 PE=2 SV=1	21.5	12	0.003	3	0.2	0.02	0.33	0.03	0.606061	0.19	0.02	0.27	0.03	EALGEYLDGKK+IAARLEARR+INRLHDVLNNLR+INSELQVPPTQVFRVPTK+IPQELWEMLNAQQVHCAGLIEDK+LKLAKLLLCGTELVTNIQVAADIR+QFQEENQSLTSDYKR+QFQEENQSLTSDYKRLVLQFK+QSDDICLLLERMEEQVK+RLRIAAR
482	sp|Q32KZ2|ACL7A_BOVIN tr|L8IRI1|L8IRI1_9CETA	1	Actin-like protein 7A OS=Bos taurus GN=ACTL7A PE=2 SV=1;Actin-like protein 7A OS=Bos mutus GN=M91_02694 PE=3 SV=1	24	10	0.003	3	0.3	0.08	0.28	0.02	1.07143	0.16	0.02	0.22	0.04	CGFAGLPKPTHRISTTVGKPYMETAKTGDNR+DLMGNILLCGGSTMLSGFPNR+DLMGNILLCGGSTMLSGFPNRLQK+ETFVGHELINPEVR+HFTEGQLGIVEDIKKK+ISTTVGKPYMETAKTGDNR+LSMYSYGR+RDLMGNILLCGGSTMLSGFPNR+TPAMHIAYQSRLSMYSYGR
483	sp|Q32L27|UB2Q2_BOVIN tr|L8IT57|L8IT57_9CETA	1	Ubiquitin-conjugating enzyme E2 Q2 OS=Bos taurus GN=UBE2Q2 PE=2 SV=1;Ubiquitin-conjugating enzyme E2 Q2 (Fragment) OS=Bos mutus GN=M91_16799 PE=4 SV=1	19.1	17	0.003	4	0.23	0.05	0.26	0.03	0.884615	0.21	0.03	0.27	0.04	DIYRSQSYK+DNFPFDPPFVR+EEEPISGK+ENLAILEKIR+NQYNLAR+QDHLNGAVSGSVQASDR
484	sp|Q32L52|GID8_BOVIN tr|L8IMK3|L8IMK3_9CETA	1	Glucose-induced degradation protein 8 homolog OS=Bos taurus GN=GID8 PE=2 SV=1;Uncharacterized protein (Fragment) OS=Bos mutus GN=M91_18932 PE=4 SV=1	43.9	8	0.003	0	-9	-9	-9	-9	1	-9	-9	-9	-9	ECLTEMERTLALLAFDNPEDSPFGDLLNMMQR+GQIQEAIALINSLHPELLDTNR+LIMNYLVTEGFK+LNNLHVQRADMNR+MESGIEPSVDLETLDER+MESGIEPSVDLETLDERIKIR
485	sp|Q32L60|TRI13_BOVIN tr|L8I3V8|L8I3V8_9CETA	1	E3 ubiquitin-protein ligase TRIM13 OS=Bos taurus GN=TRIM13 PE=2 SV=2;E3 ubiquitin-protein ligase TRIM13 (Fragment) OS=Bos mutus GN=M91_14953 PE=4 SV=1	20.4	8	0.002	5	0.18	0.07	0.25	0.09	0.72	0.17	0.04	0.24	0.05	KCLEGILEGNVR+LDTLETSKRK+LQYTLDQKK+NEILSDFETMK+VKEFFEKLQYTLDQK+VSPKMPVCKGHLGQPLNIFCLTDMQLICGICATR
486	sp|Q32L91|ACL7B_BOVIN tr|L8INH1|L8INH1_9CETA	1	Actin-like protein 7B OS=Bos taurus GN=ACTL7B PE=2 SV=1;Actin-like protein 7B OS=Bos mutus GN=M91_02695 PE=3 SV=1	15.6	6	0.002	3	0.13	0.08	0.29	0.05	0.448276	0.16	0.06	0.32	0.09	ALITDLGSQYCK+DTSSATQLK+DTSSATQLKMKPKK+EEMAANVLLCGGCTMLDGFPER+KETYVGHELLNMEAPLK
487	sp|Q32LB0|WDR70_BOVIN tr|F1MXI9|F1MXI9_BOVIN tr|L8IDT6|L8IDT6_9CETA	1	WD repeat-containing protein 70 OS=Bos taurus GN=WDR70 PE=2 SV=1;WD repeat-containing protein 70 OS=Bos taurus GN=WDR70 PE=4 SV=1;WD repeat-containing protein 70 OS=Bos mutus GN=M91_20525 PE=4 SV=1	20.1	15	0.004	7	0.13	0.02	0.31	0.03	0.419355	0.21	0.04	0.28	0.05	DRLDPLKSHKPEPPVAGPGR+EEEMNREKELR+EREEEMNR+GGDDTLKLWDIR+IKGEFMTCSNDATVR+LDPLKSHKPEPPVAGPGRGGR+LNQIMVGTGNGLAK+LVFFERR+QNEDLEPTSSGSNVAR+TDDSNPR+TMQGKKVIPTTCTYSR+TWEVENPK
488	sp|Q32LB7|VATE2_BOVIN tr|L8IK09|L8IK09_9CETA	1	V-type proton ATPase subunit E 2 OS=Bos taurus GN=ATP6V1E2 PE=2 SV=1;V-type proton ATPase subunit E 2 OS=Bos mutus GN=M91_03773 PE=3 SV=1	23.9	47	0.018	34	0.15	0.01	0.34	0.01	0.441176	0.15	0.01	0.35	0.01	IMVSNTLESR+KALFGANANR+LDLLSQQKMPEIR+LKVLRAR+NDLISELLNDAK+NDLISELLNDAKLR
489	sp|Q32LB9|NOA1_BOVIN tr|F1ML97|F1ML97_BOVIN tr|L8IC08|L8IC08_9CETA	1	Nitric oxide-associated protein 1 OS=Bos taurus GN=NOA1 PE=2 SV=1;Nitric oxide-associated protein 1 OS=Bos taurus GN=NOA1 PE=4 SV=1;Uncharacterized protein OS=Bos mutus GN=M91_21392 PE=4 SV=1	21.3	8	0.002	3	0.17	0.03	0.36	0.1	0.472222	0.13	0.03	0.25	0.11	CWLLVHHRRALR+DVRLISAK+EVNIVLPTHSIIPRTFMLKPGMVLFLGALGRIDFLK+FPICNPTPYR+KHGYLVGRVGR+LISAKTGYGVEELISALQR+LNLLKKHGYLVGR+LQVSQGQFLELVSAALR+LWDECIGAGLLPPRGYRR+RDATEAEEDLSQQEQNK
490	sp|Q32LC7|G3BP1_BOVIN tr|L8IDN9|L8IDN9_9CETA	1	Ras GTPase-activating protein-binding protein 1 OS=Bos taurus GN=G3BP PE=2 SV=1;Ras GTPase-activating protein-binding protein 1 (Fragment) OS=Bos mutus GN=M91_20719 PE=4 SV=1	20.4	16	0.005	7	0.17	0.01	0.32	0.01	0.53125	0.22	0.01	0.27	0.03	EAGEQGDVEPRR+GGLGGGMRGPPR+GGLGGGMRGPPRGGMVQKPGFGVGR+GGMVQKPGFGVGR+GGMVQKPGFGVGRSIAPR+LRGPGGPRGGLGGGMR+MVMEKPSPLLVGR+QYYTLLNQAPDMLHR+RFMQTFVLAPEGSVANK
491	sp|Q32LE2|GKAP1_BOVIN tr|L8I3M0|L8I3M0_9CETA	1	G kinase-anchoring protein 1 OS=Bos taurus GN=GKAP1 PE=2 SV=2;G kinase-anchoring protein 1 OS=Bos mutus GN=M91_04185 PE=4 SV=1	16.8	22	0.004	7	0.14	0.02	0.34	0.04	0.411765	0.18	0.02	0.3	0.03	DGRIERLK+EQQQSEANELR+KEQQQSEANELR+LEDDVHKILTR+NTGKSQTNK+NTGKSQTNKSTTNEK+VKVLQAELAKYQGGR
492	sp|Q32LH3|PIHD2_BOVIN tr|F1MNJ0|F1MNJ0_BOVIN tr|L8I9H4|L8I9H4_9CETA	1	PIH1 domain-containing protein 2 OS=Bos taurus GN=PIH1D2 PE=2 SV=1;PIH1 domain-containing protein 2 OS=Bos taurus GN=PIH1D2 PE=4 SV=2;PIH1 domain-containing protein 2 (Fragment) OS=Bos mutus GN=M91_13071 PE=4 SV=1	17.8	8	0.002	4	0.2	0.05	0.28	0.01	0.714286	0.16	0.03	0.34	0.02	DQLIRMAMR+ELCAAPEPQLCLQTR+ELCAAPEPQLCLQTRILKPKEK+MKQNLMGIQTNPADLR+NELTLEKIR+QNLMGIQTNPADLR
493	sp|Q32PB1|PROF3_BOVIN tr|L8I3N5|L8I3N5_9CETA	1	Profilin-3 OS=Bos taurus GN=PFN3 PE=2 SV=1;Profilin-3 OS=Bos mutus GN=M91_05840 PE=4 SV=1	38.7	12	0.002	3	0.17	0	0.3	0.03	0.566667	0.21	0.01	0.32	0.02	DHLLAEGDGVLDARTKGLDGR+GVHGGILNKTMHELIHGLR+IDDVAIVGHSDNR+TMHELIHGLR
494	sp|Q32PG1|AP3B1_BOVIN tr|L8IBE2|L8IBE2_9CETA	1	AP-3 complex subunit beta-1 OS=Bos taurus GN=AP3B1 PE=2 SV=1;AP-3 complex subunit beta OS=Bos mutus GN=M91_15988 PE=3 SV=1	24.4	30	0.009	9	0.15	0.01	0.32	0.03	0.46875	0.18	0.02	0.31	0.02	ATGYLELSNWPEVAPDPSVR+DKSTLVAGSVVMAFEEVCPDR+DPNQLIRASALR+DSAKLDAMK+EFQTYVKSQDKQFAAATIQTIGR+ELKPVLSQG+EMLIEIIEK+EMLIEIIEKLLK+EMLIEIIEKLLKDK+GDSKDVDKEK+IENIHVGGK+IENIHVGGKK+IVGMIAKGKNASELFPAVVK+KENPDKK+LLQMQPMQHGEIIKHMAK+NASELFPAVVK+NASELFPAVVKNVASKNIEIK+NEDLKQMLESNK+NEDLKQMLESNKDSAK+NVASKNIEIKK+QFAAATIQTIGR+RPYAMDPDHR+SGALSKYAKK+SGDSAEDSGESGSEPEAGKGR+SQDKQFAAATIQTIGR+TAKSFTSEDDLVK+THVLLHR+TVIGSVLLR…
495	sp|Q32PG9|FXL12_BOVIN tr|G3MW06|G3MW06_BOVIN tr|L8IGZ2|L8IGZ2_9CETA	1	F-box/LRR-repeat protein 12 OS=Bos taurus GN=FBXL12 PE=2 SV=1;F-box/LRR-repeat protein 12 OS=Bos taurus GN=FBXL12 PE=4 SV=1;F-box/LRR-repeat protein 12 OS=Bos mutus GN=M91_14051 PE=4 SV=1	21.2	4	0.002	1	0.31	99.99	0.27	99.99	1.14815	0.19	99.99	0.23	99.99	ISRVCHHWK+LCLHVANLSMVPITSLPCTLR+RLCLHVANLSMVPITSLPCTLR+VLELQGLGWEGQEAERILSK+VTETGLDMGLQELNYLQR
496	sp|Q32PI1|VRK1_BOVIN tr|H9KUU9|H9KUU9_BOVIN tr|L8I332|L8I332_9CETA	1	Serine/threonine-protein kinase VRK1 OS=Bos taurus GN=VRK1 PE=2 SV=1;Serine/threonine-protein kinase VRK1 OS=Bos taurus GN=VRK1 PE=4 SV=1;Serine/threonine-protein kinase VRK1 OS=Bos mutus GN=M91_16414 PE=3 SV=1	31.1	13	0.003	3	0.14	0.04	0.41	0.1	0.341463	0.17	0.03	0.24	0.04	DDGKLDLTVVENGSLK+DILLQGLKAIGSK+DPNYVRDSKIR+EAEESVESSVEDMECSDK+FMIIDRFGSDLQK+IYEANAKR+LKYLGVPKYWGSGLHDK+QTEEATQTRSKTR+SYRFMIIDRFGSDLQK+YCPEGTHKEYK
497	sp|Q32PI8|RT27_BOVIN tr|F1N1S1|F1N1S1_BOVIN	1	28S ribosomal protein S27, mitochondrial OS=Bos taurus GN=MRPS27 PE=1 SV=1;28S ribosomal protein S27, mitochondrial OS=Bos taurus GN=MRPS27 PE=4 SV=1	20.5	6	0.002	2	0.17	0	0.29	0.01	0.586207	0.25	0.01	0.29	0	AVYHNMPLLWRPGYLDRALQVMEK+EDCHLADLASLMDK+EMREKAR+MAAPMVRR+NWTIHTWIRQCLKYGAQDK+QCLKYGAQDK+YEALHSKLQALGK
498	sp|Q32PJ3|ORC3_BOVIN tr|F1N6W8|F1N6W8_BOVIN tr|L8I4T4|L8I4T4_9CETA	1	Origin recognition complex subunit 3 OS=Bos taurus GN=ORC3 PE=2 SV=1;Origin recognition complex subunit 3 OS=Bos taurus GN=ORC3 PE=4 SV=2;Origin recognition complex subunit 3 (Fragment) OS=Bos mutus GN=M91_07410 PE=4 SV=1	22.3	17	0.004	3	0.19	0.01	0.23	0.05	0.826087	0.21	0.05	0.34	0.03	CLHQFTSSLPKYPLGR+DELMAMLQNCFKLFQSSSGK+EIPTAALVLGVNVTDHDLTLR+EQVVSFVDSLVR+IALHTALNNPYYYLK+IRFLSANQCENIR+ISVPIEDYFNKGK+LFQSSSGK+NEIIHAR+QHLNAAPRIALHTALNNPYYYLKNEALR+SLTEVLQNNVTPYVVSLQAK+TDPKMPR
499	sp|Q3B7M1|KLH36_BOVIN tr|E1BDD0|E1BDD0_BOVIN tr|L8IU98|L8IU98_9CETA	1	Kelch-like protein 36 OS=Bos taurus GN=KLHL36 PE=2 SV=1;Kelch-like protein 36 OS=Bos taurus GN=KLHL36 PE=4 SV=2;Kelch-like protein 36 OS=Bos mutus GN=M91_18155 PE=4 SV=1	14.8	6	0.002	2	0.19	0	0.37	0.01	0.513514	0.1	0.01	0.34	0	DNGGDAASNLLYR+EVELIGASYIGLK+LCAYLGSSEVQR+RVDFYLASIEDMLVAVGGR+VDFYLASIEDMLVAVGGR+VYRWAEHSGTVLQRLNEQR+YHNSLAAQPVMQTKR
500	sp|Q3B7M5|LASP1_BOVIN	1	LIM and SH3 domain protein 1 OS=Bos taurus GN=LASP1 PE=2 SV=1	29.6	5	0.002	2	0.15	0	0.32	0.06	0.46875	0.2	0.05	0.32	0.01	DPQESSYR+IKKTQDQISNIK+LKQQSELQSQVR+MGPSGGEGLECER+MGPSGGEGLECERR+QSFTMVADTPENLR+SRMGPSGGEGLECERR+TGDTGMLPANYVEAI
501	sp|Q3B7M6|NEDD1_BOVIN tr|L8I0X1|L8I0X1_9CETA	1	Protein NEDD1 OS=Bos taurus GN=NEDD1 PE=2 SV=1;Protein NEDD1 (Fragment) OS=Bos mutus GN=M91_19008 PE=4 SV=1	25.9	10	0.003	3	0.13	0.01	0.25	0.1	0.52	0.28	0.1	0.27	0.04	FEKPEKEIEAQLINEPPGNGSSTPNPK+GAVAPQDKAGLPR+GAVAPQDKAGLPRSINTDTLSK+GDGLDFLPQLNSVFPPR+GDGLDFLPQLNSVFPPRK+NQDFSNFDDSGKSSLGDMFSPVR+RIILYDTSSKK+RTANVSAGGGGAQNPGVVR+SGLNKGCSNKPTAVNK+SGLNKGCSNKPTAVNKR+TLVADAPLTAVDFMPDGATLAIGSSRGKIYQYDLR
502	sp|Q3B7M7|RMP_BOVIN tr|F1MTD6|F1MTD6_BOVIN tr|L8IEW3|L8IEW3_9CETA	1	Unconventional prefoldin RPB5 interactor OS=Bos taurus GN=URI1 PE=2 SV=1;Unconventional prefoldin RPB5 interactor OS=Bos taurus GN=URI1 PE=4 SV=1;Unconventional prefoldin RPB5 interactor (Fragment) OS=Bos mutus GN=M91_20425 PE=4 SV=1	15.6	13	0.004	3	0.14	0.02	0.27	0.02	0.518519	0.13	0.06	0.41	0.09	EVLSEVSEGTTKR+INTGKNTTLK+KEVLSEVSEGTTK+KEVLSEVSEGTTKR+LREEQEKVVTNCQEK+NFESRVEFTEDLQK+NTTLKFSEKK+QAVGLVEHRKEHVR+TDFEFKAKHR
503	sp|Q3MHE4|MSH2_BOVIN tr|L8IJE3|L8IJE3_9CETA	1	DNA mismatch repair protein Msh2 OS=Bos taurus GN=MSH2 PE=2 SV=1;DNA mismatch repair protein Msh2 OS=Bos mutus GN=M91_10324 PE=3 SV=1	35.2	31	0.009	9	0.13	0.02	0.34	0.02	0.382353	0.2	0.03	0.3	0.02	CKTPQGQR+DIYQDLNR+DKQMFHIITGPNMGGK+DSLIIIDELGR+ECVMPGGETAGDMGK+EDALLAAR+EIMDDLEKK+FFQGMPEKPTTTVR+FPDLNRLAK+GGILITER+GGILITERK+GRITLKASR+GVSTFMAEMLETASILR+IIQEFLSKVKQVPFTEMSEESITR+KMQSTLVSAAR+LDSSTQFGYYFR+LNLVEAFVEDAELR+LRQVIQRGGILITER+LTSLNEEYTK+LVNQWIKQPLMDKNR+MNFESFVKDLLLVR+MQSTLVSAAR+MSTVDGQRQVGVGYVDSTQR+NNKNFSTVDIQK+NNKNFSTVDIQKNGVK+NNSFVNEIISR+QMFHIITGPNMGGK+QYRVEVYK+RADFSTKDIYQDLNR+RCYLEREQ…
504	sp|Q3MHE8|SRPR_BOVIN tr|F1MNJ2|F1MNJ2_BOVIN tr|L8IUL4|L8IUL4_9CETA	1	Signal recognition particle receptor subunit alpha OS=Bos taurus GN=SRPR PE=2 SV=1;Signal recognition particle receptor subunit alpha OS=Bos taurus GN=SRPR PE=4 SV=1;Signal recognition particle receptor subunit alpha OS=Bos mutus GN=M91_20293 PE=4 SV=1	22.7	20	0.007	8	0.12	0.03	0.33	0.03	0.363636	0.11	0.02	0.39	0.03	DAAGIAMEAIAFAR+EAEESSKIRAPTTMK+EDMESVLDKMR+EGSDGPLATSK+GTLGGMFGMLKGLVGSK+GTLGGMFGMLKGLVGSKSLTR+GYGKDAAGIAMEAIAFAR+KEGSDGPLATSK+KFEDSEKAK+KREEFIQK+LLREAEESSK+LSALHPPEKHGGR+MQDNAPLMTALAK+RLSALHPPEKHGGR+VDMLRDIMDAQR
505	sp|Q3MHF7|MTAP_BOVIN tr|H9KUV2|H9KUV2_BOVIN tr|L8J3F4|L8J3F4_9CETA	1	S-methyl-5'-thioadenosine phosphorylase OS=Bos taurus GN=MTAP PE=1 SV=1;S-methyl-5'-thioadenosine phosphorylase (Fragment) OS=Bos taurus GN=MTAP PE=1 SV=1;S-methyl-5'-thioadenosine phosphorylase (Fragment) OS=Bos mutus GN=M91_15273 PE=3 SV=1	34.6	8	0.003	4	0.17	0.03	0.26	0.04	0.653846	0.24	0.06	0.27	0.06	AESIMFQTWGADVINMTTVPEVVLAK+EEIQPGDIIIIDQFIDRTTRR+EHEEAVSVDR+IKNVDCVLLAR+IKNVDCVLLARHGR+LQTFYDGNHSCAR+NVDCVLLAR+TREVLIETAK
506	sp|Q3MHF8|LS14A_BOVIN tr|F1MSA5|F1MSA5_BOVIN	1	Protein LSM14 homolog A OS=Bos taurus GN=LSM14A PE=2 SV=1;Protein LSM14 homolog A OS=Bos taurus GN=LSM14A PE=4 SV=1	25.5	24	0.005	2	0.17	0.01	0.32	0	0.53125	0.15	0.01	0.36	0.02	EEIDREFHNKLK+GGAFTTPR+GGHRGGRGR+GGLGFRGGR+GGLGFRGGRGR+GGRGRFGIR+LNAETFGIPLRPNR+MSGGTPYIGSK+MSGGTPYIGSKISLISKAEIR+SPTMEQAVQTASAHLPAPAPVGR+TKSFFDNISCDDNRER
507	sp|Q3MHG6|GTPBA_BOVIN tr|L8IS11|L8IS11_9CETA	1	GTP-binding protein 10 OS=Bos taurus GN=GTPBP10 PE=2 SV=1;GTP-binding protein 10 OS=Bos mutus GN=M91_18714 PE=4 SV=1	24	18	0.006	9	0.19	0.01	0.33	0.01	0.575758	0.18	0.01	0.29	0.01	FVAGEGANSRVSALKGSK+GGDVWVVAHNR+GGDVWVVAHNRMTLK+GGSGGMGYPR+GGSGGMGYPRLGGEGGK+IIGELNKEKDR+IMYSDFK+LFTKGGSGGMGYPR+LGGEGGKGGDVWVVAHNR+MVRCSCVLFR+TAVSSPRMDIT
508	sp|Q3MHH0|DCA12_BOVIN tr|L8I3J4|L8I3J4_9CETA	1	DDB1- and CUL4-associated factor 12 OS=Bos taurus GN=DCAF12 PE=2 SV=2;DDB1-and CUL4-associated factor 12 (Fragment) OS=Bos mutus GN=M91_04159 PE=4 SV=1	16.8	2	0.001	0	-9	-9	-9	-9	1	-9	-9	-9	-9	CNTLFVVDVQTSQITKIPILK+DGSMGLWEVTDDVLTK+HNVSRVPVYSHITHKALK+LFVAGGPLPSGLHGNYAGLWS
509	sp|Q3MHH4|SYQ_BOVIN tr|F1MTC2|F1MTC2_BOVIN tr|L8HRA3|L8HRA3_9CETA	1	Glutamine--tRNA ligase OS=Bos taurus GN=QARS PE=2 SV=1;Glutamine--tRNA ligase OS=Bos taurus GN=QARS PE=1 SV=2;Glutaminyl-tRNA synthetase OS=Bos mutus GN=M91_16963 PE=3 SV=1	25.3	30	0.008	12	0.23	0.02	0.24	0.02	0.958333	0.23	0.02	0.26	0.02	ADAGEKPK+ARETLKNTVLSAQLR+ATGTLLYGLASR+DQAYVCHQR+DVLNDTAPR+EAATQAQQTLGSSIDK+ETLKNTVLSAQLR+ILQLVAAGAVR+KGKFAEGEATLR+LFTLTALR+LFTLTALRR+LSFLVSYITSR+MDPVAYRVKYTPHHR+QHLDITGGQVR+RGFPPEAINNFCAR+TPGYVTTPHTMDLLKQHLDITGGQVRTR+TVTLKEDPGK+YHFSMGLLMGEARAALK
510	sp|Q3MHH6|PYRD2_BOVIN tr|F1MN72|F1MN72_BOVIN tr|L8I7M5|L8I7M5_9CETA	1	Pyridine nucleotide-disulfide oxidoreductase domain-containing protein 2 OS=Bos taurus GN=PYROXD2 PE=2 SV=1;Pyridine nucleotide-disulfide oxidoreductase domain-containing protein 2 OS=Bos taurus GN=PYROXD2 PE=4 SV=1;Pyridine nucleotide-disulfide oxidoreductase domain-containing protein 2 OS=Bos mutus GN=M91_14362 PE=4 SV=1	13	6	0.002	2	0.11	0.06	0.36	0.01	0.305556	0.19	0.01	0.32	0.06	FGVNTAVFERR+GLYLCGSGAHPGGGVMGAAGRNAAHVVFRDLR+NPYSFTPMLEEGTGGKVPR+VQGVVLQDGSEVR
511	sp|Q3MHP0|RBM40_BOVIN tr|F1MJQ8|F1MJQ8_BOVIN tr|L8IF20|L8IF20_9CETA	1	RNA-binding protein 40 OS=Bos taurus GN=RNPC3 PE=2 SV=1;RNA-binding protein 40 OS=Bos taurus GN=RNPC3 PE=4 SV=1;RNA-binding protein 40 OS=Bos mutus GN=M91_14128 PE=4 SV=1	26.7	11	0.004	5	0.13	0.03	0.33	0	0.393939	0.2	0.02	0.32	0.02	DDSDEMPSECISRR+DLKFIFGRYVDFSSETQR+EDLLKYFGAQSVR+EEMETLSVFR+ESEYESSDDEDRQR+HVQEKDLK+IFPQPNLNITEEIKDDSDEMPSECISRR+IMFDIRLMKEGR+ISREEMETLSVFR+LMKEGRMK+MTKLMELANLQPKRPKPIK+NLAKHVQEK+RSDDPVEDDK
512	sp|Q3MHW9|NB5R1_BOVIN tr|G5E5N5|G5E5N5_BOVIN tr|L8HSW9|L8HSW9_9CETA	1	NADH-cytochrome b5 reductase 1 OS=Bos taurus GN=CYB5R1 PE=2 SV=1;NADH-cytochrome b5 reductase 1 (Fragment) OS=Bos taurus GN=CYB5R1 PE=4 SV=1;NADH-cytochrome b5 reductase 1 (Fragment) OS=Bos mutus GN=M91_13305 PE=4 SV=1	37.3	11	0.003	0	-9	-9	-9	-9	1	-9	-9	-9	-9	APPEARVARNLGMIAGGTGITPMLQLIR+EDLEELQAR+FRFALPTAHHVLGLPVGK+LLDKTTVNHNTKR+NLGMIAGGTGITPMLQLIR+SPVLLASLGVGLLTLLGVALGAYLVR+SRRPPVTLLDPNEKYQLR+TTVNHNTKR+VARNLGMIAGGTGITPMLQLIR
513	sp|Q3MHX5|SUCB2_BOVIN tr|A5D9G3|A5D9G3_BOVIN	1	Succinyl-CoA ligase [GDP-forming] subunit beta, mitochondrial OS=Bos taurus GN=SUCLG2 PE=2 SV=1;Succinyl-CoA ligase subunit beta (Fragment) OS=Bos taurus GN=LOC283398 PE=2 SV=1	21.5	16	0.005	9	0.15	0.03	0.24	0.05	0.625	0.12	0.03	0.38	0.02	DIFAMDDK+EIVLKAQILAGGR+INFDDNAEFR+KLYNLFLK+KVMVAEALDISR+KVMVAEALDISRETYLAILMDR+LNAKEIVLKAQILAGGR+QKDIFAMDDKSENEPIENEAAR+QMIGYNLATKQTPK
514	sp|Q3MHY8|RBM7_BOVIN tr|L8IRY6|L8IRY6_9CETA tr|V6F9A6|V6F9A6_BOVIN	1	RNA-binding protein 7 OS=Bos taurus GN=RBM7 PE=2 SV=1;RNA-binding protein 7 OS=Bos mutus GN=M91_14861 PE=4 SV=1;RNA-binding protein 7 OS=Bos taurus GN=RBM7 PE=4 SV=1	22.9	10	0.003	7	0.2	0.01	0.23	0.01	0.869565	0.26	0.03	0.29	0.02	LNSHPYVMDR+NHDGWSHDYDNRRDSGR+QAVMNNVLR+SFSSSENFQRQAVMNNVLR+TVDNMTPSAQTIQR
515	sp|Q3MI00|DNJB1_BOVIN tr|L8J1A7|L8J1A7_9CETA	1	DnaJ homolog subfamily B member 1 OS=Bos taurus GN=DNAJB1 PE=2 SV=3;DnaJ-like protein subfamily B member 1 (Fragment) OS=Bos mutus GN=M91_00839 PE=4 SV=1	17.4	6	0.002	3	0.19	0.01	0.28	0.02	0.678571	0.21	0.01	0.31	0.02	EALCGCTVNVPTLDGR+ISLREALCGCTVNVPTLDGR+KVPGEGLPLPK+KVPGEGLPLPKTPEK+LNPDGKSIRNEDK+RDGSDVIYPAR
516	sp|Q3SWX5|CADH6_BOVIN tr|L8J3E7|L8J3E7_9CETA	1	Cadherin-6 OS=Bos taurus GN=CDH6 PE=2 SV=1;Cadherin-6 OS=Bos mutus GN=M91_06499 PE=4 SV=1	21.5	14	0.004	5	0.11	0.02	0.21	0.05	0.52381	0.21	0.04	0.41	0.04	ADQLIQTLRAIDK+DDPYSGHQFSFSLAPEAASGSNFTIQDNKDNTAGIFTR+DIVPEALFLPRR+DNTAGIFTRKNGYNR+DSATVRIMVEDVDEPPVFSK+EDAQINTTIGSVTAQDPDAARNPVK+EEKPVYILR+KRTLELSGNSK+LDREEKPVYILR+NPEAIEDSKLR+RDIVPEALFLPR+TGRPVEPESEFIIK+TSGFPAKKR
517	sp|Q3SWX9|RAD21_BOVIN tr|L8IJM4|L8IJM4_9CETA	1	Double-strand-break repair protein rad21 homolog OS=Bos taurus GN=RAD21 PE=2 SV=1;Double-strand-break repair protein rad21-like protein (Fragment) OS=Bos mutus GN=M91_19968 PE=4 SV=1	23.2	13	0.003	4	0.15	0.03	0.4	0.03	0.375	0.17	0.02	0.26	0.04	GGEADNLDEFLK+LFSLPAQPLWNNR+LLKLFTRCLTPLVPEDLR+MALRTSGHLLLGVVR+NTNRKQAAAK+TGAESISLLELCRNTNR+TNLDESAMPPPPPQGVK+TNLDESAMPPPPPQGVKR+TQQMLHGLQRALAK+VEEITMREEVGNISILQENDFGDFGMDDREIMR
518	sp|Q3SX14|GELS_BOVIN tr|F1MJH1|F1MJH1_BOVIN tr|F1N1I6|F1N1I6_BOVIN tr|L8IZV3|L8IZV3_9CETA	1	Gelsolin OS=Bos taurus GN=GSN PE=2 SV=1;Gelsolin OS=Bos taurus GN=GSN PE=1 SV=1;Gelsolin OS=Bos taurus GN=GSN PE=1 SV=1;Gelsolin (Fragment) OS=Bos mutus GN=M91_04258 PE=4 SV=1	23.4	15	0.004	4	0.16	0.04	0.3	0.02	0.533333	0.19	0.02	0.33	0.02	AAYRTSPR+EGGQTAPASTR+EGGQTAPASTRLFQVR+EPAHLMSLFGGKPMIIYR+EVQGFESATFLGYFKSGLKYK+HVVPNEVVVQR+KMDAHPPRLFACSNK+LFQVKGR+LFQVKGRR+LFQVRASSSGATR+LFQVRASSSGATRAVEVMPK+LYKVSNGAGTMSVSLVADENPFAQGALR+MDAHPPRLFACSNKIGR+QTQVSVLPEGGETPLFK+TGALELLRVLR+VSNGAGTMSVSLVADENPFAQGALR
519	sp|Q3SX26|TRIP6_BOVIN	1	Thyroid receptor-interacting protein 6 OS=Bos taurus GN=TRIP6 PE=2 SV=1	19.8	2	0.001	1	0.19	99.99	0.46	99.99	0.413043	0.04	99.99	0.31	99.99	AQLRGQHFYAVER+GGLRPGSLDAEIDSLTSMLAELDGGR+ILRAMGKAYHPGCFTCVVCHR+QPEPARAPQGRALPR+RGASQASGPSPGPHFPLPGR
520	sp|Q3SX41|LC7L3_BOVIN	1	Luc7-like protein 3 OS=Bos taurus GN=LUC7L3 PE=2 SV=1	22	11	0.003	5	0.16	0.02	0.29	0.03	0.551724	0.14	0.03	0.37	0.04	ATVEELKEK+DRNLAPDEK+ESDTKNEVNGTSEDIKSEGDTQSN+GSDDKKSSVK+LDELMGR+NEEKIQVLTDK+NLAPDEKRSNVR+VGYERDFLRYLQSLLAEVER
521	sp|Q3SYS0|RM24_BOVIN tr|L8IGQ7|L8IGQ7_9CETA	1	39S ribosomal protein L24, mitochondrial OS=Bos taurus GN=MRPL24 PE=1 SV=1;39S ribosomal protein L24, mitochondrial OS=Bos mutus GN=M91_20915 PE=3 SV=1	39.8	4	0.002	1	0.19	99.99	0.3	99.99	0.633333	0.19	99.99	0.33	99.99	DAGKQGKVVQVIR+LSALLALASK+MRLSALLALASK+RVAVEPIPEEDWHLFCGDR+TLEEEVMEAMGIQETR+TLEEEVMEAMGIQETRR+YVGKTVDFRGTMVPSEAPLLHNQVK
522	sp|Q3SYT6|CLGN_BOVIN tr|L8IJ42|L8IJ42_9CETA tr|Q2EGT5|Q2EGT5_BOVIN	1	Calmegin OS=Bos taurus GN=CLGN PE=2 SV=1;Calmegin (Fragment) OS=Bos mutus GN=M91_09208 PE=3 SV=1;Calmegin-like (Fragment) OS=Bos taurus PE=3 SV=1	23.8	12	0.004	0	-9	-9	-9	-9	1	-9	-9	-9	-9	AALEKPVDLEEEK+ALGLELWSMTSDIYFDNFIICSEKEVADR+DDIDAEISIYDGR+EADESTGSGDGPIK+EEEGEPEEK+HAKPPDVDLKRFFTDR+HPKTGVFEEK+LDCGGAYIK+QSDGEIVEK+SGSEDEMK+SGSEDEMKEADESTGSGDGPIK+YKGIWRPPMIDNPNYQGIWSPRK
523	sp|Q3SYU1|NOC2L_BOVIN tr|L8J181|L8J181_9CETA	1	Nucleolar complex protein 2 homolog OS=Bos taurus GN=NOC2L PE=2 SV=1;Nucleolar complex protein 2-like protein OS=Bos mutus GN=M91_10946 PE=4 SV=1	20.8	23	0.005	7	0.19	0.02	0.31	0.02	0.612903	0.18	0.02	0.29	0.03	DREIQLEISGK+DREIQLEISGKER+DSSRVLQPSSSPLWAKLR+DVFLSPVLK+EIQLEISGK+FQVTDSAVFNALVTFCIR+ISSRPINFAVILKLSK+LFHEVVQAFRAAVATTQGDEEGAETSK+LRDREIQLEISGK+NAMTTRR+QCRMLLKR+QLAIHLRNAMTTR+QMYITYVR+RMVVLWSTGEETLRVLAFVVLIK+VLQPSSSPLWAK
524	sp|Q3SYU3|S39A1_BOVIN tr|L8HSA3|L8HSA3_9CETA	1	Zinc transporter ZIP1 OS=Bos taurus GN=SLC39A1 PE=2 SV=1;Zinc transporter ZIP1 (Fragment) OS=Bos mutus GN=M91_03042 PE=4 SV=1	18.5	4	0.002	2	0.25	0	0.22	0.04	1.13636	0.28	0.04	0.24	0.01	DQARAMELCLALLLHKGILAVSLSLR+EQSGPPPREETR+ILKVILLLAGFALLTGLLFIQI
525	sp|Q3SYV3|OXA1L_BOVIN	1	Mitochondrial inner membrane protein OXA1L OS=Bos taurus GN=OXA1L PE=2 SV=1	21.8	59	0.026	46	0.19	0.01	0.29	0.01	0.655172	0.2	0.01	0.29	0.01	EAKLTGNHTEFYR+IHNHLPEIQKFSARIR+KPLTAGLGFPADR+MALALMCGR+MALALMCGRR+NAEMAHQLQER+NDPPNTPNSSSSSSSSNK+NDPPNTPNSSSSSSSSNKAKSK+RMQNHLELAAR
526	sp|Q3SYW9|CHTOP_BOVIN tr|L8HPT6|L8HPT6_9CETA	1	Chromatin target of PRMT1 protein OS=Bos taurus GN=CHTOP PE=2 SV=1;Friend of PRMT1 protein OS=Bos mutus GN=M91_03033 PE=4 SV=1	50	43	0.009	11	0.14	0.02	0.36	0.02	0.388889	0.17	0.01	0.3	0.02	GAMGRGGIGGRGR+GGFGGRGRGR+GGIGGRGRGMIGR+GGLGRGAMGR+GGLGRGAMGRGGIGGR+GGMSLRGQNLLRGGR+GGPGRGGLGR+GGPGRGGLGRGAMGR+GGRAVAPRMGLR+GMIGRGRGGFGGR+LGKSNIQAR+LGRPIGALAR+LGRPIGALARGAIGGR+NKQPMPVNIR+NRRLAQQMENRPSVQAALK+RLAQQMENRPSVQAALKLK+TLLRGGMSLRGQNLLR
527	sp|Q3SYX0|NDRG1_BOVIN tr|F1MS38|F1MS38_BOVIN	1	Protein NDRG1 OS=Bos taurus GN=NDRG1 PE=2 SV=1;Protein NDRG1 OS=Bos taurus GN=NDRG1 PE=1 SV=1	14.3	8	0.003	4	0.26	0.02	0.29	0.02	0.896552	0.19	0.01	0.25	0.03	LMRSRTASGSSVTSLEGAR+SHTSEGTRSRSHTSEGTR+TASGSSVTSLEGAR+TASGSSVTSLEGARSR+YFVQGMGYMPSASMTR
528	sp|Q3SYY9|LMBD1_BOVIN tr|F1N364|F1N364_BOVIN tr|L8IJ80|L8IJ80_9CETA	1	Probable lysosomal cobalamin transporter OS=Bos taurus GN=LMBRD1 PE=2 SV=1;Probable lysosomal cobalamin transporter OS=Bos taurus GN=LMBRD1 PE=4 SV=1;Putative lysosomal cobalamin transporter (Fragment) OS=Bos mutus GN=M91_12585 PE=4 SV=1	11	5	0.002	2	0.19	0.07	0.33	0.27	0.575758	0.17	0.16	0.15	0.03	CTQVKMALK+DGRPLPAR+SKDGRPLPARDR+YTLGFVVICALLLLVGAFVPLNLPDNKNSTEWEKVK
529	sp|Q3SYZ4|SYDC_BOVIN tr|F1MTX7|F1MTX7_BOVIN tr|L8IBZ8|L8IBZ8_9CETA	1	Aspartate--tRNA ligase, cytoplasmic OS=Bos taurus GN=DARS PE=2 SV=1;Aspartate--tRNA ligase, cytoplasmic OS=Bos taurus GN=DARS PE=3 SV=1;Aspartyl-tRNA synthetase, cytoplasmic OS=Bos mutus GN=M91_16842 PE=3 SV=1	31.3	20	0.006	8	0.15	0.02	0.32	0.02	0.46875	0.19	0.03	0.3	0.03	EAGIEMGDEEDLSTPNEK+EAGIEMGDEEDLSTPNEKLLGR+EIMDAAEDYAK+EIMDAAEDYAKER+FAANINKESIVDVEGVVR+ISDLTVQK+IYVISSAEPR+LEYCEALAMLR+QMCICADFEKVFCIGPVFRAEDSNTHR+QSNSYDMFMR+QTSMFPRDPKR+SQEKPREIMDAAEDYAK+TSTSQAIFR+VTMLFLGLHNVRQTSMFPR
530	sp|Q3SZ40|DDX56_BOVIN tr|L8IF71|L8IF71_9CETA	1	Probable ATP-dependent RNA helicase DDX56 OS=Bos taurus GN=DDX56 PE=2 SV=1;Putative ATP-dependent RNA helicase DDX56 OS=Bos mutus GN=M91_15816 PE=4 SV=1	17.9	8	0.002	1	0.11	99.99	0.35	99.99	0.314286	0.14	99.99	0.39	99.99	ARTGSGKTAAYAIPMLQLLLHR+DAMRSVTKQAIR+DKASDPEAGVAR+DLLARARTGSGK+EELLHSEKLK+ELARQAQSMIQQLAAYCARDIR+LKTYFEDNPR+LKTYFEDNPRDLQLLR+RDKASDPEAGVAR+TAAYAIPMLQLLLHR+TYFEDNPRDLQLLR
531	sp|Q3SZ52|UB2V1_BOVIN tr|L8IDG6|L8IDG6_9CETA	1	Ubiquitin-conjugating enzyme E2 variant 1 OS=Bos taurus GN=UBE2V1 PE=2 SV=1;Transmembrane protein 189 (Fragment) OS=Bos mutus GN=M91_17001 PE=4 SV=1	29.3	4	0.002	2	0.19	0.08	0.34	0.11	0.558824	0.19	0.09	0.2	0.12	INMNGVNSSNGVVDPR+IYSLKIECGPK+WTGMIIGPPRTIYENR
532	sp|Q3SZ54|IF4A1_BOVIN tr|L8IKI3|L8IKI3_9CETA	1	Eukaryotic initiation factor 4A-I OS=Bos taurus GN=EIF4A1 PE=2 SV=1;Eukaryotic initiation factor 4A-I (Fragment) OS=Bos mutus GN=M91_20379 PE=3 SV=1	40.2	24	0.008	10	0.18	0.02	0.29	0.02	0.62069	0.21	0.02	0.29	0.02	AIIPCIKGYDVIAQAQSGTGK+DQIYDIFQK+EELTLEGIR+EELTLEGIRQFYINVER+ENYIHRIGRGGR+GVAINMVTEEDKR+KGVAINMVTEEDK+KVDWLTEKMHAR+LNSNTQVVLLSATMPSDVLEVTKK+LQMEAPHIIVGTPGR+LQMEAPHIIVGTPGRVFDMLNR+LQMEAPHIIVGTPGRVFDMLNRR+SGSSRVLITTDLLAR+VDWLTEKMHARDFTVSAMHGDMDQK+YLSPKYIKMFVLDEADEMLSR
533	sp|Q3SZ57|FETA_BOVIN tr|L8IT90|L8IT90_9CETA	1	Alpha-fetoprotein OS=Bos taurus GN=AFP PE=2 SV=1;Alpha-fetoprotein OS=Bos mutus GN=M91_08160 PE=4 SV=1	26.9	15	0.005	3	0.2	0.04	0.27	0	0.740741	0.17	0.06	0.33	0.01	DKDLSMAR+DKDLSMARFTYEYSR+DLCQVQGVPLQTMKQQFLINLVK+DLSMARFTYEYSR+ELFINRYIYEIAR+IIPHCCK+LPTTLELGHCIIHAENDDKPEGLSPNVNR+LPTTLELGHCIIHAENDDKPEGLSPNVNRFLGDR+QLACGEGVADLIIGHLCIR+QQFLINLVK+VMSYICSQQDILSR+VSQKFPKANFTEIQK+VTSITKELRESSLLNQHICAVMGK
534	sp|Q3SZ71|MPPB_BOVIN tr|E1B941|E1B941_BOVIN	1	Mitochondrial-processing peptidase subunit beta OS=Bos taurus GN=PMPCB PE=2 SV=1;Mitochondrial-processing peptidase subunit beta OS=Bos taurus GN=PMPCB PE=3 SV=1	16.7	10	0.003	5	0.22	0.01	0.25	0.02	0.88	0.23	0.03	0.28	0.01	EWMRLCTSVTESEVAR+FTGSEIRVR+LCGFTERLLIGGAAGR+LFSAARR+LLIGGAAGR+LLIGGAAGRSLYFGGNRLR+NLLKTNMLLQLDGSTPICEDIGR+RLCGFTERLLIGGAAGR+TNMLLQLDGSTPICEDIGR
535	sp|Q3SZ76|COMD3_BOVIN tr|F1MUK6|F1MUK6_BOVIN tr|L8I7E5|L8I7E5_9CETA	1	COMM domain-containing protein 3 OS=Bos taurus GN=COMMD3 PE=2 SV=1;COMM domain-containing protein 3 (Fragment) OS=Bos taurus GN=COMMD3 PE=4 SV=2;COMM domain-containing protein 3 OS=Bos mutus GN=M91_16237 PE=4 SV=1	21.2	7	0.002	4	0.18	0.03	0.35	0.01	0.514286	0.17	0.01	0.3	0.02	DASKSLER+LEYQIKTNQLDK+NSLEILLGSIGR
536	sp|Q3SZ87|SSRG_BOVIN tr|L8IGX6|L8IGX6_9CETA	1	Translocon-associated protein subunit gamma OS=Bos taurus GN=SSR3 PE=2 SV=1;Uncharacterized protein OS=Bos mutus GN=M91_11447 PE=4 SV=1	26.5	12	0.006	5	0.15	0.02	0.29	0.03	0.517241	0.21	0.03	0.32	0.02	EDAVSKEVTR+EDAVSKEVTRK+EVTRKLSEADNR+LSEADNR+MAPKGGPKQQSEEDLLLQDFSR+NVKFVLK+NVKFVLKHK+QQSEEDLLLQDFSR
537	sp|Q3SZC2|PSB9_BOVIN tr|L8IVM2|L8IVM2_9CETA	1	Proteasome subunit beta type-9 OS=Bos taurus GN=PSMB9 PE=1 SV=1;Proteasome subunit beta type OS=Bos mutus GN=M91_02556 PE=3 SV=1	21.9	14	0.003	6	0.16	0.02	0.33	0.02	0.484848	0.22	0.02	0.26	0.03	EGGQVYGTMSGMLIR+RFTTNAIALAMKR+TGAPNGDLPR+VSAGEAVVNR
538	sp|Q3SZC4|NSF1C_BOVIN tr|L8J3P2|L8J3P2_9CETA	1	NSFL1 cofactor p47 OS=Bos taurus GN=NSFL1C PE=2 SV=1;NSFL1 cofactor p47 OS=Bos mutus GN=M91_17502 PE=4 SV=1	34.3	16	0.005	6	0.16	0.02	0.35	0.03	0.457143	0.14	0.02	0.33	0.04	EANLLNAVIVQRLT+EFVAVTGAEEDRAR+FYAGGSERSGQQIVGPPRK+LADGGRLVQKFNHSHR+LAHGGQVNLDMEDHR+LGSTAPQILNTSSPAQQAENEAK+QDALREFVAVTGAEEDRAR+RGEVPAELRR+TGFSLDNGELR
539	sp|Q3SZE9|TBCC_BOVIN tr|L8I9Z2|L8I9Z2_9CETA	1	Tubulin-specific chaperone C OS=Bos taurus GN=TBCC PE=2 SV=1;Tubulin-specific chaperone C OS=Bos mutus GN=M91_00718 PE=4 SV=1	16.8	6	0.002	2	0.15	0.15	0.36	0.04	0.416667	0.16	0.05	0.22	0.16	DTRIFLQVTSR+ERTLVPERLQK+METGGLSAAALANGDLGSQR+NKNNWNDVDDFNWLAR+TLVPERLQK
540	sp|Q3SZG6|F92A1_BOVIN tr|E1B7H1|E1B7H1_BOVIN tr|F1MWJ9|F1MWJ9_BOVIN tr|L8IN17|L8IN17_9CETA	1	Protein FAM92A1 OS=Bos taurus GN=FAM92A1 PE=2 SV=1;Protein FAM92A1 (Fragment) OS=Bos taurus GN=FAM92A1 PE=4 SV=2;Protein FAM92A1 (Fragment) OS=Bos taurus GN=FAM92A1 PE=4 SV=2;Protein FAM92A1 (Fragment) OS=Bos mutus GN=M91_13740 PE=4 SV=1	22	5	0.002	1	0.19	99.99	0.38	99.99	0.5	0.1	99.99	0.33	99.99	AYGTIVKMK+DHQTEDDDEEDEDLDVTEEEN+IDEEEDLEVFR+LEAKVVEPLK+RDDLKATLTAR
541	sp|Q3SZK8|NHRF1_BOVIN	1	Na(+)/H(+) exchange regulatory cofactor NHE-RF1 OS=Bos taurus GN=SLC9A3R1 PE=2 SV=1	18.2	4	0.001	1	0.13	99.99	0.26	99.99	0.5	0.33	99.99	0.28	99.99	EAEQSPQER+EAEQSPQERRELRPR+EEMLRAQEGPGQAEPPAAAAEERGAGGENEPPAAAPEPR+MSADAGAGAPLPR
542	sp|Q3SZM1|MK67I_BOVIN	1	MKI67 FHA domain-interacting nucleolar phosphoprotein OS=Bos taurus GN=NIFK PE=2 SV=1	40.9	12	0.002	2	0.12	0.03	0.34	0.03	0.352941	0.17	0.02	0.36	0.02	AYFSQFGTVTR+DNEIVFKQPVSGVK+EETQETQSPASSK+KGIDYNFPSLVK+MAAFGGPAKPLLSLNPQEDAKFK+NEENASNTGPQNSR+NEENASNTGPQNSRKHQALR+QPVSGVKEETQETQSPASSK+QPVSGVKEETQETQSPASSKK+RPSYPAVK+VHEELFR+YNQNRSLVQKLR
543	sp|Q3T046|BDH2_BOVIN tr|F1MLA4|F1MLA4_BOVIN tr|L8IUU5|L8IUU5_9CETA	1	3-hydroxybutyrate dehydrogenase type 2 OS=Bos taurus GN=BDH2 PE=2 SV=1;3-hydroxybutyrate dehydrogenase type 2 OS=Bos taurus GN=BDH2 PE=3 SV=1;3-hydroxybutyrate dehydrogenase type 2 (Fragment) OS=Bos mutus GN=M91_01469 PE=3 SV=1	16.3	7	0.002	2	0.17	0.01	0.23	0.1	0.73913	0.31	0.04	0.25	0.13	LDGKVIVLTAAAQGIGR+LDGKVIVLTAAAQGIGRAAALAFAK+SGNIINMSSVASSIK
544	sp|Q3T057|RL23_BOVIN tr|A1XED4|A1XED4_BOVIN tr|L8IGX3|L8IGX3_9CETA	1	60S ribosomal protein L23 OS=Bos taurus GN=RPL23 PE=2 SV=2;RPL23 (Fragment) OS=Bos taurus PE=2 SV=1;60S ribosomal protein L23 (Fragment) OS=Bos mutus GN=M91_05261 PE=3 SV=1	46.7	31	0.014	25	0.22	0	0.28	0	0.785714	0.2	0.01	0.3	0	ECADLWPRIASNAGSIA+GSAITGPVAK+LPAAGVGDMVMATVK
545	sp|Q3T063|NADC_BOVIN tr|F1MHB8|F1MHB8_BOVIN	1	Nicotinate-nucleotide pyrophosphorylase [carboxylating] OS=Bos taurus GN=QPRT PE=2 SV=1;Nicotinate-nucleotide pyrophosphorylase [carboxylating] OS=Bos taurus GN=QPRT PE=3 SV=1	12	5	0.002	2	0.18	0.02	0.29	0	0.62069	0.22	0.04	0.3	0.05	AARRAADFALK+AVRAARR+DNHVMAAGGVKKAVR+RAADFALK+YDLGGLVMVKDNHVMAAGGVKK
546	sp|Q3T0A0|ABHD1_BOVIN tr|L8IJW2|L8IJW2_9CETA	1	Abhydrolase domain-containing protein 1 OS=Bos taurus GN=ABHD1 PE=2 SV=1;Abhydrolase domain-containing protein 1 (Fragment) OS=Bos mutus GN=M91_00163 PE=4 SV=1	12.4	5	0.001	1	0.11	99.99	0.4	99.99	0.275	0.18	99.99	0.31	99.99	AFCASNTEDLVTVINHIKSR+KVMDNVVNVDFVLQARTIR+LTAGLCQVVNR
547	sp|Q3T0L3|RM17_BOVIN tr|L8HXK1|L8HXK1_9CETA	1	39S ribosomal protein L17, mitochondrial OS=Bos taurus GN=MRPL17 PE=1 SV=1;39S ribosomal protein L17, mitochondrial OS=Bos mutus GN=M91_19696 PE=3 SV=1	41.3	10	0.003	0	-9	-9	-9	-9	1	-9	-9	-9	-9	DLIPKLFQVLAPR+GLRQDQEASTRSSHPAQTPEV+IHLLQNLLTGLVR+IHLLQNLLTGLVRHERIEASWAR+MLQIPNRNQQDRAK+QDQEASTRSSHPAQTPEV
548	sp|Q3T0L7|RL28_BOVIN tr|L8HY95|L8HY95_9CETA	1	60S ribosomal protein L28 OS=Bos taurus GN=RPL28 PE=2 SV=3;60S ribosomal protein L28 OS=Bos mutus GN=M91_13717 PE=4 SV=1	71.5	8	0.003	5	0.2	0.03	0.24	0.03	0.833333	0.2	0.02	0.33	0.02	ARNSFRYNGLIHR+MSAHLQWMVVR+NKYRPDLRMAAIR+QTYSTEPNNLKAR+RASAILRSQKPVMVK+SQKPVMVKR+TTINKNARATLSSIR+TVGVEPAADGK+TVGVEPAADGKGVVVVMKR
549	sp|Q3T0R4|DRS7B_BOVIN tr|F1MN23|F1MN23_BOVIN tr|L8IS22|L8IS22_9CETA	1	Dehydrogenase/reductase SDR family member 7B OS=Bos taurus GN=DHRS7B PE=2 SV=1;Dehydrogenase/reductase SDR family member 7B OS=Bos taurus GN=DHRS7B PE=3 SV=1;Dehydrogenase/reductase SDR family member 7B (Fragment) OS=Bos mutus GN=M91_06555 PE=3 SV=1	25.6	15	0.005	8	0.24	0.04	0.22	0.03	1.09091	0.19	0.02	0.31	0.02	ALLPAMIRRR+LLQWLRMRAYVR+LMASRAR+MRAYVRNAVVVITGATSGLGR+NAEALEELSQELAASR+NAVVVITGATSGLGR+TLAPGLFFRLMASRAR+VMETNYFGPVALTKALLPAMIR
550	sp|Q3T0V9|DEOC_BOVIN	1	Deoxyribose-phosphate aldolase OS=Bos taurus GN=DERA PE=2 SV=1	22	13	0.003	3	0.14	0.02	0.26	0.08	0.538462	0.21	0	0.34	0.1	ASMIAMMAGSDFIKTSTGK+ETVNATFPVAIVMLR+IQVNKPAVLR+QIYHHVTGR+TGNKVGFKPAGGIR+TSTGKETVNATFPVAIVMLRAIR
551	sp|Q3T0W4|PP1R7_BOVIN tr|L8I7S8|L8I7S8_9CETA	1	Protein phosphatase 1 regulatory subunit 7 OS=Bos taurus GN=PPP1R7 PE=1 SV=1;Protein phosphatase 1 regulatory subunit 7 (Fragment) OS=Bos mutus GN=M91_12490 PE=4 SV=1	40.2	31	0.008	8	0.19	0.02	0.26	0.03	0.730769	0.2	0.02	0.31	0.03	CIENLEGLQSLR+ELYLSHNGIEVIEGLDNNNK+IEGLQSLVNLR+IENISSLHQLQMLELGSNRIR+KIMLALPSVR+LTKIEGLQSLVNLR+LTMLDIASNR+LTMLDIASNRIK+LTMLDIASNRIKK+NIEGIDKLTR+NPLQRDPQYRR+QNLIKCIENLEGLQSLR+RIENLDALTELEVLDISFNLLR
552	sp|Q3T0X8|NHRF3_BOVIN	1	Na(+)/H(+) exchange regulatory cofactor NHE-RF3 OS=Bos taurus GN=PDZK1 PE=2 SV=1	39.8	12	0.005	5	0.19	0.02	0.25	0.03	0.76	0.22	0.02	0.3	0.04	AYDYFQAKKIPIVSSMADPLDDDPDPDEGR+DIDPKSPAEK+ETDKHHSEQK+EVQKGGPADLAGLEDEDVIIEVNGVNMLDESYEK+GGDQTSLLVVDK+GSPAEKAGLQDGDR+IEKDTDGHLVR+INGVFVDK+IPIVSSMADPLDDDPDPDEGR+KIPIVSSMADPLDDDPDPDEGR+LTKQEGNSYGFFLR+NNDLVVAVNGK+QEGNSYGFFLR+SGNSVTLLVLDGDSYEK+SGNSVTLLVLDGDSYEKAMK+SGSRVTFLLVDK+TVQGKNGVYMTDIKPQGVAMK+VTFLLVDKETDK
553	sp|Q3T122|EIF3D_BOVIN tr|L8J494|L8J494_9CETA	1	Eukaryotic translation initiation factor 3 subunit D OS=Bos taurus GN=EIF3D PE=2 SV=1;Eukaryotic translation initiation factor 3 subunit D (Fragment) OS=Bos mutus GN=M91_10497 PE=3 SV=1	22.8	15	0.006	7	0.19	0.03	0.3	0.02	0.633333	0.19	0.03	0.28	0.03	CVIDICMK+EEMDFPQLMK+ITTRSEKPLRSIK+NEIASVAYR+NEIASVAYRYR+NLAMEATYINHNFSQQCLR+NMLQFNLQTLPKSAK+NNSYKLAR+RIFHTVTTTDDPVIR+RIFHTVTTTDDPVIRK+TLNEWDSRHCNGVDWR+TQKTAYQR
554	sp|Q3T148|EIF3M_BOVIN tr|F1N5F7|F1N5F7_BOVIN tr|L8ITI0|L8ITI0_9CETA	1	Eukaryotic translation initiation factor 3 subunit M OS=Bos taurus GN=EIF3M PE=2 SV=2;Eukaryotic translation initiation factor 3 subunit M OS=Bos taurus GN=EIF3M PE=3 SV=1;Eukaryotic translation initiation factor 3 subunit M OS=Bos mutus GN=EIF3M PE=3 SV=1	32.7	24	0.005	7	0.17	0.02	0.33	0.02	0.515152	0.22	0.02	0.27	0.02	DVESVMNSVVSLLLILEPDK+IDQTQRKVVVSHSTHR+LLYEALVDCKK+NSLLSLSDT+QEALIESLCEK+QNLNKVKNSLLSLSDT+SDAASKVMVELLGSYTEDNASQARVDAHR+VAASCGAIQYIPTELDQVR+VKNSLLSLSDT
555	sp|Q3ZBA3|PKHA2_BOVIN tr|F1MHG9|F1MHG9_BOVIN tr|L8IHX0|L8IHX0_9CETA	1	Pleckstrin homology domain-containing family A member 2 OS=Bos taurus GN=PLEKHA2 PE=2 SV=1;Pleckstrin homology domain-containing family A member 2 (Fragment) OS=Bos taurus GN=PLEKHA2 PE=4 SV=1;Pleckstrin-like protein domain-containing family A member 2 (Fragment) OS=Bos mutus GN=M91_10730 PE=4 SV=1	26.4	15	0.005	9	0.19	0.02	0.28	0.02	0.678571	0.18	0.01	0.33	0.01	DWVEALNQASKITVPKAGNLPLTTEVLK+EIGAAVQALKCHPR+EKPFVFNLDDENIR+LGESSTSAVLPSSRIR+SGDLLMR+SGYCVKQGNVR+SGYCVKQGNVRK+TIFLKDVLK
556	sp|Q3ZBA6|DJB11_BOVIN tr|L8HN38|L8HN38_9CETA	1	DnaJ homolog subfamily B member 11 OS=Bos taurus GN=DNAJB11 PE=2 SV=1;DnaJ-like protein subfamily B member 11 OS=Bos mutus GN=M91_05076 PE=4 SV=1	36	7	0.002	5	0.14	0.06	0.31	0.03	0.451613	0.14	0.04	0.34	0.04	AQEKFQDLGAAYEVLSDSEK+DGMEYPFIGEGEPHVDGEPGDLR+DKITRPGAKLWK+FQMTQEVVCDECPNVKLVNEER+GSLIITFDVDFPK+LALQLHPDR+NKPVARQAPGKR+NPDDPRAQEK+QEMRTTQLGPGR
557	sp|Q3ZBD7|G6PI_BOVIN tr|L8HW81|L8HW81_9CETA	1	Glucose-6-phosphate isomerase OS=Bos taurus GN=GPI PE=2 SV=4;Glucose-6-phosphate isomerase (Fragment) OS=Bos mutus GN=M91_04642 PE=3 SV=1	23.2	42	0.018	11	0.22	0.02	0.25	0.02	0.88	0.23	0.03	0.26	0.03	EFGIDPQNMFEFWDWVGGR+ILLANFLAQTEALMR+INFTEDR+INFTEDRAVLHVALR+INFTEDRAVLHVALRNR+KELQAAGR+NLVTETVMQMLVDVAK+NLVTETVMQMLVDVAKSR+NRSNAPILVDGK+NRSNAPILVDGKDVMPEVNR+RLFEGDRDR+SGEWKGYSGK+TWYEQHGSDLNLR+VKEFGIDPQNMFEFWDWVGGR
558	sp|Q3ZBE0|DQX1_BOVIN	1	ATP-dependent RNA helicase DQX1 OS=Bos taurus GN=DQX1 PE=2 SV=1	11.3	7	0.002	2	0.18	0.01	0.32	0.02	0.5625	0.16	0.02	0.33	0.03	AAGIPPGSCLCLYPK+DFLNQLREERTDSSIR+EERTDSSIR+KLRGELLELMQR+LGSLPGDLR+LLLQEVASTRGTGARGVLILDEAQER+RLRAAGIPPGSCLCLYPK
559	sp|Q3ZBE5|SLU7_BOVIN tr|L8IJ54|L8IJ54_9CETA	1	Pre-mRNA-splicing factor SLU7 OS=Bos taurus GN=SLU7 PE=2 SV=2;Pre-mRNA-splicing factor SLU7 OS=Bos mutus GN=M91_05163 PE=4 SV=1	21	14	0.004	5	0.17	0.03	0.25	0.04	0.68	0.18	0.02	0.35	0.05	GSEVHLQADPTK+HGTVIKGQER+INNHTHIWGSYWKEGR+LGNAPAEVDEEGK+LVEQANSPK+MSAAAVDAANAAPLSGSKEMSLEEPKK+MTREDWR+NLDPNSAYYDPKTR+TLKAQKLQEELASGK
560	sp|Q3ZBE9|NSDHL_BOVIN tr|L8J1X3|L8J1X3_9CETA	1	Sterol-4-alpha-carboxylate 3-dehydrogenase, decarboxylating OS=Bos taurus GN=NSDHL PE=2 SV=1;Sterol-4-alpha-carboxylate 3-dehydrogenase, decarboxylating (Fragment) OS=Bos mutus GN=M91_08438 PE=3 SV=1	37.9	6	0.002	3	0.12	0	0.36	0.02	0.333333	0.1	0.07	0.36	0.08	DPQLVPILIEAAK+GKMKFMIGNGK+GVSTVFHCASPPPFNNNKELFYR+ILTGLNYEAPK+KLMGYRPLVTMDDAVDK+NLVDFTFVENVVHGHILAAEHLSQDTALGGK+RCTVIGGCGFLGQHMVEQLLAR
561	sp|Q3ZBG4|HES1_BOVIN tr|G3N2D5|G3N2D5_BOVIN tr|L8I3Y8|L8I3Y8_9CETA	1	Transcription factor HES-1 OS=Bos taurus GN=HES1 PE=2 SV=1;Transcription factor HES-1 OS=Bos taurus GN=HES1 PE=4 SV=1;Transcription factor HES-1 (Fragment) OS=Bos mutus GN=M91_13763 PE=4 SV=1	40.8	9	0.003	2	0.32	0.18	0.21	0.01	1.52381	0.27	0.2	0.1	0.01	FLSTCEGVNTEVRTR+INESLSQLK+INESLSQLKTLILDALKK+LEKADILEMTVKHLR+MPADIMEKNSSSPVAATPASVNTTPDKPK+NLQRAQMTAALSTDPSVLGK+NSSSPVAATPASVNTTPDKPK
562	sp|Q3ZBI3|RNH2B_BOVIN tr|L8I3D4|L8I3D4_9CETA	1	Ribonuclease H2 subunit B OS=Bos taurus GN=RNASEH2B PE=2 SV=2;Ribonuclease H2 subunit B OS=Bos mutus GN=M91_02378 PE=4 SV=1	19.8	13	0.004	6	0.16	0.02	0.33	0.02	0.484848	0.16	0.02	0.33	0.02	KMKSGLVFVK+KVNQTMAALKTNK+NPPSKKAK+SGMKSIDSFFGTK+TNKVNVSAR+YSKEKTLK
563	sp|Q3ZBI5|NRROS_BOVIN tr|G3X6S8|G3X6S8_BOVIN tr|L8IEH7|L8IEH7_9CETA	1	Negative regulator of reactive oxygen species OS=Bos taurus GN=NRROS PE=2 SV=1;Negative regulator of reactive oxygen species OS=Bos taurus GN=NRROS PE=4 SV=1;Leucine-rich repeat-containing protein 33 OS=Bos mutus GN=M91_13855 PE=4 SV=1	16.2	10	0.003	5	0.22	0.03	0.29	0.04	0.758621	0.23	0.02	0.22	0.05	FGGSLALQTLDLRR+IGHVAFQEQAR+KMPSLSHLNLK+LTELPAGVPQVCK+NLASVPSDLPPSSR+NVGLTSSFTELDFSAFENLR+RNLLTALPQRAVSEQLAGSLR+TLGNNSLQR
564	sp|Q3ZBJ1|NCBP2_BOVIN tr|L8IEI3|L8IEI3_9CETA	1	Nuclear cap-binding protein subunit 2 OS=Bos taurus GN=NCBP2 PE=2 SV=1;Nuclear cap-binding protein subunit 2 OS=Bos mutus GN=M91_13861 PE=4 SV=1	46.8	8	0.002	1	0.17	99.99	0.3	99.99	0.566667	0.15	99.99	0.38	99.99	ADAENAMRYINGTRLDDR+DEYRQDYDAGR+EGRQYGR+QDYDAGRGGYGKLAQNQ+SGDIKKIIMGLDK+SGGQVRDEYR+SGGQVRDEYRQDYDAGR+TDWDAGFKEGR+TDWDAGFKEGRQYGR
565	sp|Q3ZBK1|WDR89_BOVIN tr|L8IEI8|L8IEI8_9CETA	1	WD repeat-containing protein 89 OS=Bos taurus GN=WDR89 PE=2 SV=1;WD repeat-containing protein 89 OS=Bos mutus GN=M91_06904 PE=4 SV=1	18.7	31	0.012	20	0.15	0.01	0.32	0.01	0.46875	0.16	0.01	0.35	0.01	GSLVAVLCSNGSIR+IASSVHQR+IASSVHQRVR+IMNCMTSGLVHVTSLQGGHAATVR+LASGKPVQLFK+LFVVGGTNTGIIR
566	sp|Q3ZBK6|LSM4_BOVIN tr|L8IEA2|L8IEA2_9CETA	1	U6 snRNA-associated Sm-like protein LSm4 OS=Bos taurus GN=LSM4 PE=2 SV=1;U6 snRNA-associated Sm-like protein LSm4 (Fragment) OS=Bos mutus GN=M91_11698 PE=4 SV=1	46.8	13	0.003	6	0.17	0.01	0.27	0.02	0.62963	0.21	0.03	0.33	0.02	EEVVAKGRGR+EVICTSR+GMGGAGRGVFGGR+GRGMGGAGRGVFGGR+GSTIKYLR+IPDEIIDMVK+IPDEIIDMVKEEVVAKGR+QQKGRGMGGAGR+TAQNHPMLVELK
567	sp|Q3ZBK7|GLE1_BOVIN tr|L8HT59|L8HT59_9CETA	1	Nucleoporin GLE1 OS=Bos taurus GN=GLE1 PE=2 SV=1;Nucleoporin GLE1 OS=Bos mutus GN=M91_12718 PE=4 SV=1	25.6	19	0.006	6	0.2	0.01	0.29	0.02	0.689655	0.16	0.02	0.33	0.02	AATIPVSQISTIAGSKLK+ALSEMASEQLK+DLLQVDLSAFR+DLLSNLHQEIR+GAEGLRQWQEEQEKK+GEDVLQECMSLPK+IHSLLSGKPVQSGGR+LCYDRDWLLR+LYAAIIQLR+MPSEGRCWETLQALRSCDK+QYQVQFWKMILLIK+QYQVQFWKMILLIKEDYFPR+TRGNQLCSLVSGIIR+VGALILAHLHKK
568	sp|Q3ZBN0|ABRAL_BOVIN tr|L8IVA6|L8IVA6_9CETA	1	Costars family protein ABRACL OS=Bos taurus GN=ABRACL PE=3 SV=1;Uncharacterized protein OS=Bos mutus GN=M91_20305 PE=4 SV=1	46.9	5	0.002	2	0.18	0.04	0.3	0.01	0.6	0.2	0.04	0.31	0	CANLFEALVGTLKAAKR+LGSKNADGK+LLVEEIHRLGSK+NADGKLSVK
569	sp|Q3ZBT2|FBX9_BOVIN tr|L8I1V7|L8I1V7_9CETA	1	F-box only protein 9 OS=Bos taurus GN=FBXO9 PE=2 SV=2;F-box only protein 9 (Fragment) OS=Bos mutus GN=M91_01085 PE=4 SV=1	11.4	10	0.003	6	0.12	0.02	0.35	0.01	0.342857	0.14	0.01	0.37	0.03	FDGVYISKTTYIR+GSLLRAADTR+GSLLRAADTRGK+STGETAVTAFEIDKMYTPLLFARVR
570	sp|Q3ZBU9|UBXN4_BOVIN	1	UBX domain-containing protein 4 OS=Bos taurus GN=UBXN4 PE=2 SV=2	23.8	15	0.003	7	0.21	0.04	0.31	0.03	0.677419	0.11	0.03	0.3	0.03	EMLDYKR+ETSTKERSTVAR+IKQQIALDRAER+IQFRLPDGSSFTNQFPSDAPLEEAR+QAEMEIKRETSTK+QEEELTKR+QQIALDRAER+TGKEMLDYK+TGKEMLDYKR+TKEEVEAAK+TQDDGEDENNTWNGNSTQQM+VTEASSNSFVAIK+VTEASSNSFVAIKIDTR
571	sp|Q3ZBY2|TAGL3_BOVIN tr|L8I664|L8I664_9CETA	1	Transgelin-3 OS=Bos taurus GN=TAGLN3 PE=2 SV=1;Transgelin OS=Bos mutus GN=M91_10276 PE=3 SV=1	50.8	11	0.003	2	0.13	0.06	0.3	0.03	0.433333	0.14	0.02	0.4	0.04	DDGCYRGEPSWFHR+DMAAVQR+GASQAGMTGYGMPR+GASQAGMTGYGMPRQIM+GPSYGLSREVQEK+MANRGPSYGLSREVQEK+QGQNVIGLQMGSNKGASQAGMTGYGMPR+QGQNVIGLQMGSNKGASQAGMTGYGMPRQIM+QMEQISQFLK+TLMALGSVAVTK+TLMALGSVAVTKDDGCYRGEPSWFHR+WLMDGTVLCK
572	sp|Q3ZC98|NUP85_BOVIN tr|L8HUD8|L8HUD8_9CETA	1	Nuclear pore complex protein Nup85 OS=Bos taurus GN=NUP85 PE=2 SV=1;Nuclear pore complex protein Nup85 (Fragment) OS=Bos mutus GN=M91_03318 PE=4 SV=1	21.4	13	0.004	4	0.18	0.03	0.28	0.08	0.642857	0.1	0.07	0.31	0.08	ACMEEMHQFAVADKDSAIGR+DAAFATLVSDR+DAAFATLVSDRFLR+EADSNPTSAGMCRVLGDLMR+IEEELTGKSR+IPLTTEQKALK+IPLTTEQKALKVLR+LDEARQMLSKEADSNPTSAGMCR+LGSALSWSIR+NNRLGSALSWSIR+NYRSVIR+QMTEQVRSICKVLAMK+VEILRLALAR+VEILRLALARNLAR
573	sp|Q3ZCC3|TRAF6_BOVIN tr|L8IXL6|L8IXL6_9CETA tr|L8IZW2|L8IZW2_9CETA tr|Q1KLV9|Q1KLV9_BOVIN	1	TNF receptor-associated factor 6 OS=Bos taurus GN=TRAF6 PE=2 SV=1;TNF receptor-associated factor 6 OS=Bos mutus GN=M91_01253 PE=4 SV=1;Uncharacterized protein OS=Bos mutus GN=M91_01211 PE=4 SV=1;TNF receptor-associated factor 6 OS=Bos taurus GN=TRAF6 PE=2 SV=1	9.8	8	0.003	4	0.2	0.04	0.25	0.05	0.8	0.31	0.04	0.19	0.04	CPNEGCLHKMELR+METQSMYVNELKR+METQSMYVNELKRTIR+NPKGFGYVTFMHLEALR+TIRTLEDK
574	sp|Q3ZCC8|TPPP3_BOVIN tr|L8IH45|L8IH45_9CETA	1	Tubulin polymerization-promoting protein family member 3 OS=Bos taurus GN=TPPP3 PE=1 SV=1;Tubulin polymerization-promoting protein family member 3 OS=Bos mutus GN=M91_18273 PE=4 SV=1	42.6	6	0.002	2	0.23	0.01	0.28	0.02	0.821429	0.17	0.01	0.31	0	EEAFDAICQLVAGK+LTDTSKYTGSHKER+MAASTDVAGLEESFR+QDILDDSGYVSAYK+SARVINYEEFK+TGGAVERLTDTSK
575	sp|Q3ZCH0|GRP75_BOVIN tr|L8IC80|L8IC80_9CETA	1	Stress-70 protein, mitochondrial OS=Bos taurus GN=HSPA9 PE=2 SV=1;Stress-70 protein, mitochondrial (Fragment) OS=Bos mutus GN=M91_15307 PE=3 SV=1	36.4	28	0.009	17	0.15	0.01	0.31	0.02	0.483871	0.2	0.01	0.31	0.02	AAVSRFVGTAASR+DAGQISGLNVLR+DAGQISGLNVLRVINEPTAAALAYGLDK+DNMALQRVR+DQLPADECNK+DQLPADECNKLK+EGSGSSGTGEQKDNQKEEK+ERVEAVNMAEGIIHDTETKMEEFK+ETGVDLTKDNMALQR+FVGTAASR+LKEEISKMR+LTRAQFEGIVTDLIR+MASEREGSGSSGTGEQK+MEEFKDQLPADECNKLK+MISASRAAVSR+MISASRAAVSRFVGTAASR+NVPFKIVR+QAKVLENAEGAR+QAVTNPNNTFYATKRLIGR+RTIAPCQKAMQDAEVSK+SQVFSTAADGQTQVEIKVCQGER+TTPSVVAFTADGERLVGMPAK+TTPSVVAFTADGERLVGMPAKR
576	sp|Q4PJK1|KCAB1_BOVIN tr|A6QPP0|A6QPP0_BOVIN	1	Voltage-gated potassium channel subunit beta-1 OS=Bos taurus GN=KCNAB1 PE=2 SV=1;KCNAB1 protein OS=Bos taurus GN=KCNAB1 PE=2 SV=1	22.2	11	0.002	6	0.21	0.05	0.25	0.05	0.84	0.15	0.02	0.32	0.02	DLSPIAERLGCTLPQLAVAWCLR+HIIEGLKGSLQR+IGVGAMTWSPLACGIISGK+LYWGGKAETER+NKPYSKKDYR+WSAMEIMEAYSVAR
577	sp|Q4PL64|HPCA_BOVIN tr|L8HX05|L8HX05_9CETA	1	Neuron-specific calcium-binding protein hippocalcin OS=Bos taurus GN=HPCA PE=2 SV=3;Neuron-specific calcium-binding protein hippocalcin OS=Bos mutus GN=M91_11113 PE=4 SV=1	28.5	5	0.002	1	0.14	99.99	0.3	99.99	0.466667	0.27	99.99	0.29	99.99	DCPTGILNVDEFKK+DGKLSLEEFIR+IFRQMDTNNDGKLSLEEFIR+MGKQNSKLRPEMLQDLR+QMDTNNDGKLSLEEFIR+QNSKLRPEMLQDLR+RTEKIFR+TEKIFRQMDTNNDGK
578	sp|Q4U5R3|PSME1_BOVIN tr|L8I0F6|L8I0F6_9CETA tr|Q2KJE7|Q2KJE7_BOVIN	1	Proteasome activator complex subunit 1 OS=Bos taurus GN=PSME1 PE=1 SV=1;Proteasome activator complex subunit 1 OS=Bos mutus GN=M91_12422 PE=4 SV=1;Proteasome (Prosome, macropain) activator subunit 1 (PA28 alpha) OS=Bos taurus GN=PSME1 PE=1 SV=1	26.5	10	0.003	6	0.17	0.02	0.32	0.02	0.53125	0.17	0.05	0.3	0.01	DIRLMVMEIR+ISELDAFLK+LMVMEIR+MATLRVLPEAQAK+QLVHELDEAEYR+QQEKEDKDEK+TENLLGSYFPKK
580	sp|Q52QI2|RTL1_BOVIN	1	Retrotransposon-like protein 1 OS=Bos taurus GN=RTL1 PE=2 SV=2	9.5	15	0.004	3	0.14	0.02	0.36	0.07	0.388889	0.17	0.02	0.29	0.08	LLPESRPR+LNKSIVSTITGYPTPGSR+NHLFLLLLVR+NISPMEVEASPAEMK+NISPMEVEASPAEMKILPIR+NLLAMAALLVMLR+NLLAMAALLVMLRFRR+NLMEFAFPYR+QALRVAEDAMFNLR+QMESSEGSSNTTVETPPGGR+RAILRLLPESRPR+SLLFWKNLLAMAALLVMLR
581	sp|Q56JZ1|RL13_BOVIN tr|F1MK30|F1MK30_BOVIN tr|Q3SZG7|Q3SZG7_BOVIN	1	60S ribosomal protein L13 OS=Bos taurus GN=RPL13 PE=2 SV=3;60S ribosomal protein L13 OS=Bos taurus GN=RPL13 PE=1 SV=1;60S ribosomal protein L13 OS=Bos taurus GN=RPL13 PE=2 SV=1	34.6	17	0.008	13	0.19	0.01	0.28	0.02	0.678571	0.19	0.02	0.31	0.01	AGRGFSLEELR+CTESLQANVQR+LATQLTGPVMPIR+LFGIRAKR+MARANARLFGIR+SKLILFPR+VATWFNQPARKIR+VRAGRGFSLEELR
582	sp|Q58CP9|STIM1_BOVIN tr|B0JYL7|B0JYL7_BOVIN tr|G3X721|G3X721_BOVIN tr|L8J5Z2|L8J5Z2_9CETA	1	Stromal interaction molecule 1 OS=Bos taurus GN=STIM1 PE=2 SV=1;Stromal interaction molecule 1 OS=Bos taurus GN=STIM1 PE=2 SV=1;Stromal interaction molecule 1 OS=Bos taurus GN=STIM1 PE=1 SV=1;Stromal interaction molecule 1 (Fragment) OS=Bos mutus GN=M91_07830 PE=4 SV=1	18.9	10	0.004	7	0.13	0.02	0.3	0.01	0.433333	0.18	0.03	0.35	0.04	AADEALSAMTSNGSHR+DLTHSDSESSLHMSDR+EGAEKIKK+LAVTNTTMTGTVLKMTDRSHR+LMDDDANGDVDVEESDEFLR+LQLSGHAMPR+LSFDAVR+QALSEVTAALR+QKYAEEELEQVR
583	sp|Q58CQ5|ANKZ1_BOVIN	1	Ankyrin repeat and zinc finger domain-containing protein 1 OS=Bos taurus GN=ANKZF1 PE=2 SV=2	16.8	22	0.005	5	0.14	0.01	0.3	0.02	0.466667	0.17	0.01	0.38	0.02	AGDVGMLKDR+APRSGRSLFFGGR+ARPPYTVAADRSTR+DARGAAAHSAGASLR+DCVVLMAAAGHFAGAIFQGREVLTHK+DLLAGPAWAK+EVLTHKTFHR+EVRDLLAGPAWAK+FMEKNPDAYDYSK+NEFRRFMEK+NPDAYDYSK+RYNEAALYK+SGRSLFFGGR
584	sp|Q58CR3|EIF2D_BOVIN tr|G8JKW9|G8JKW9_BOVIN tr|L8IVZ3|L8IVZ3_9CETA	1	Eukaryotic translation initiation factor 2D OS=Bos taurus GN=EIF2D PE=2 SV=1;Eukaryotic translation initiation factor 2D OS=Bos taurus GN=EIF2D PE=4 SV=1;Ligatin OS=Bos mutus GN=M91_02287 PE=4 SV=1	21.3	7	0.002	2	0.36	0.03	0.22	0.06	1.63636	0.09	0.06	0.3	0.03	ASNKKVTVVR+DEQHTVTKLPWDSLLGR+DSVQVQIQGNQIHHLGR+KADLPLLTSTLLGSHMFSCCPEGR+KGSVLEGSEVRTFVINYAK+KNDLVDADNK+LLLEEYR+MFAKAFRVK+NLEAYGLDPR+TFVINYAK
585	sp|Q58CT4|TM180_BOVIN tr|L8J168|L8J168_9CETA	1	Transmembrane protein 180 OS=Bos taurus GN=TMEM180 PE=2 SV=1;Transmembrane protein 180 (Fragment) OS=Bos mutus GN=M91_06649 PE=4 SV=1	11.4	13	0.004	5	0.15	0.04	0.32	0.03	0.46875	0.2	0.02	0.3	0.03	LHMVKAQR+QFLSSQPRSGAGLSSR+SGAGLSSRAVVLAR+SGAGLSSRAVVLARVR+VFTEGTCKLLTLVVTDLVDEDLVLNHR
586	sp|Q58D49|MMAB_BOVIN tr|E1B6Z7|E1B6Z7_BOVIN	1	Cob(I)yrinic acid a,c-diamide adenosyltransferase, mitochondrial OS=Bos taurus GN=MMAB PE=2 SV=1;Cob(I)yrinic acid a,c-diamide adenosyltransferase, mitochondrial OS=Bos taurus GN=MMAB PE=4 SV=2	14.1	9	0.003	4	0.19	0.02	0.32	0.03	0.59375	0.22	0.01	0.27	0.01	IYKKNDLSDR+KNDLSDRT+LSDYLFTLAR+MAVWGPGGRLGLR
587	sp|Q58D56|DRG2_BOVIN	1	Developmentally-regulated GTP-binding protein 2 OS=Bos taurus GN=DRG2 PE=2 SV=1	31	9	0.003	2	0.11	0.04	0.4	0.09	0.275	0.08	0.09	0.36	0.03	GQRPDFTDAIILR+IDQISMEEVDRLAR+NKATEYHLGLLKAK+STFLSLMTSTASEAASYEFTTLTCIPGVIEYK+TADVVIMMLDATKGEVQR+TADVVIMMLDATKGEVQRSLLEK+VGLTHTMEHEDVIQIVK
588	sp|Q58D84|FSTL1_BOVIN tr|L8I212|L8I212_9CETA	1	Follistatin-related protein 1 OS=Bos taurus GN=FSTL1 PE=2 SV=1;Follistatin-related protein 1 (Fragment) OS=Bos mutus GN=M91_01367 PE=4 SV=1	34.9	8	0.002	3	0.21	0.08	0.26	0.04	0.807692	0.14	0.02	0.34	0.05	CALEDETYADGAETEVDCNR+CLNPSFNPPEKK+DACLTGSK+GSNYSEILDK+HQETAEKSKR+ICANVFCGAGR+ICANVFCGAGRECAVTEK+KSVSPSASPVVCYQSNRDELR+LSFQEFLKCLNPSFNPPEK
589	sp|Q58DA8|ZDHC9_BOVIN tr|L8HVZ6|L8HVZ6_9CETA	1	Palmitoyltransferase ZDHHC9 OS=Bos taurus GN=ZDHHC9 PE=2 SV=1;Palmitoyltransferase OS=Bos mutus GN=M91_01118 PE=3 SV=1	14.3	13	0.004	7	0.17	0.01	0.31	0.02	0.548387	0.17	0.03	0.33	0.01	GSWTGKNR+LKYCYTCKIFRPPR+NFQINNQIVK+NFQINNQIVKLK+NTFCCDGR+NTFCCDGRVMMAR+WEKLPGR
590	sp|Q58DH8|FEN1_BOVIN tr|L8IA24|L8IA24_9CETA	1	Flap endonuclease 1 OS=Bos taurus GN=FEN1 PE=2 SV=1;Flap endonuclease 1 OS=Bos mutus GN=M91_15482 PE=3 SV=1	19.5	26	0.007	13	0.16	0.02	0.28	0.02	0.571429	0.18	0.01	0.35	0.01	LDDFFKVTGSLSSAKR+LSKSRQGSTQGR+QLQEAQAAGAEAEVEKFTK+SGELAKRSER+VAIDASMSIYQFLIAVR+VTGSLSSAK+VTGSLSSAKR
591	sp|Q58DK8|TRI38_BOVIN tr|L8IRF2|L8IRF2_9CETA	1	E3 ubiquitin-protein ligase TRIM38 OS=Bos taurus GN=TRIM38 PE=2 SV=1;Tripartite motif-containing protein 38 OS=Bos mutus GN=M91_11370 PE=4 SV=1	14.6	7	0.002	2	0.14	0.06	0.31	0.02	0.451613	0.2	0.01	0.34	0.03	DTVMPQTPQSGFWAIR+DTVMPQTPQSGFWAIRR+IQSDFKTLQR+LLQDVKDTLSR+QLEEECMNLKVFTAEQITK+QLGNLIEVIK
592	sp|Q58DL5|BCAR3_BOVIN tr|L8IPR5|L8IPR5_9CETA	1	Breast cancer anti-estrogen resistance protein 3 OS=Bos taurus GN=BCAR3 PE=2 SV=2;Breast cancer anti-estrogen resistance protein 3 OS=Bos mutus GN=M91_06380 PE=4 SV=1	26	59	0.025	39	0.09	0.01	0.36	0.01	0.25	0.1	0.01	0.41	0.01	DGDFLVR+DSLSSPGDFVLTCQWK+DSMGDLYSFSAIMK+DSMGDLYSFSAIMKALEMPQITR+ELFTNSDPK+GSDSQLCPKPPPKPCK+LLPPENKPLETSMLK+LLPPENKPLETSMLKRAK+NDESCEIMLNHLATAR+NLPQHFKIR+NMGVNSGLELITLPYGHQLR+QVSENLMQRDGDFLVR+RTVVRLSEAYSR+SGSQPACLDHMQDR+SGSQPACLDHMQDRRALSLK+TEFQMRLLWGSK+TGSEPTLSPAVVR+VIAQHLLSVDCKVAR
593	sp|Q58DN4|PPME1_BOVIN tr|A0A0E3TKD9|A0A0E3TKD9_BOSMU tr|L8I5W4|L8I5W4_9CETA	1	Protein phosphatase methylesterase 1 OS=Bos taurus GN=PPME1 PE=2 SV=3;Protein phosphatase methylesterase 1 OS=Bos mutus grunniens GN=PME-1 PE=2 SV=1;Protein phosphatase methylesterase 1 OS=Bos mutus GN=M91_09992 PE=3 SV=1	24.5	12	0.003	3	0.21	0.01	0.28	0.01	0.75	0.2	0.01	0.31	0	FQMQVLPQCGHAVHEDAPDK+KDHPYTWRIELAK+MGPGRKR+MRMGPGRK+MSALEKSMHLGR+QCEGITSPEGSK+SLENAIEWSVKSGQIR+VQCRIVALDLR
594	sp|Q58DV7|HNMT_BOVIN tr|L8IPR2|L8IPR2_9CETA	1	Histamine N-methyltransferase OS=Bos taurus GN=HNMT PE=2 SV=1;Histamine N-methyltransferase OS=Bos mutus GN=M91_21030 PE=4 SV=1	30.1	9	0.003	2	0.27	0.06	0.23	0.12	1.17391	0.24	0.04	0.22	0.02	DLQKPEFSIKK+ELVAKTSNLENIK+ETSSEYQNRMMEK+ILSIGGGAGEIDLQILSK+KLPGIIAR+LWEKYGSRLPR+SLFTDHSRYVESFR
595	sp|Q58DW6|RAB25_BOVIN tr|L8ICU1|L8ICU1_9CETA	1	Ras-related protein Rab-25 OS=Bos taurus GN=RAB25 PE=2 SV=1;Ras-related protein Rab-25 (Fragment) OS=Bos mutus GN=M91_20890 PE=3 SV=1	45.2	16	0.003	5	0.2	0.03	0.29	0.01	0.689655	0.18	0.01	0.32	0.01	ELYDHAEATIVVMLVGNKSDLSQSR+NEFSHDSR+QNNARTNAVTLGSGPAGQELGPGEKR+TTIGVEFSTR+TTIGVEFSTRTVMLGTAAIK+TVMLGTAAIK+TVMLGTAAIKAQIWDTAGLER
596	sp|Q5BIM1|TRI45_BOVIN tr|L8I6N5|L8I6N5_9CETA	1	Tripartite motif-containing protein 45 OS=Bos taurus GN=TRIM45 PE=2 SV=1;Tripartite motif-containing protein 45 OS=Bos mutus GN=M91_20791 PE=4 SV=1	24.7	12	0.004	4	0.17	0.01	0.31	0.03	0.548387	0.18	0.02	0.32	0.04	DATGESMGR+ELLRGTQPHVEALEEALAQIKGTNSAVQER+GEGQGLVCDLCSDREVEK+GGDNVQVTVIPNDK+KTTYHTMVDLK+LLKQLEDIR+LPSGTTAGNSGK+MAEKRRPLLGFVGK+QKKTTYHTMVDLK+QPASFIVLCKDATGESMGR+THCPLCMGLFKAPR+TTYHTMVDLK
597	sp|Q5BIR6|MED17_BOVIN tr|L8IR18|L8IR18_9CETA	1	Mediator of RNA polymerase II transcription subunit 17 OS=Bos taurus GN=MED17 PE=2 SV=1;Mediator of RNA polymerase II transcription subunit 17 OS=Bos mutus GN=M91_18006 PE=4 SV=1	18.4	10	0.004	7	0.19	0.02	0.28	0.01	0.678571	0.19	0.03	0.3	0.04	DLPKSDVLQDSK+EIFAQLSREAVQIK+EVQWNKMEGRNFVYK+FQPSLWPWDSVR+FQPSLWPWDSVRNNLR+LEAAQNVLLCKEIFAQLSR+LSGPQAFDK+MRLSGPQAFDK+MRLSGPQAFDKNEINSIQSSEGLLEK+NEINSIQSSEGLLEK+NFVYKMELLMSALSPCLL+NQCKDLPK+NTDIDLDKK
598	sp|Q5E958|RS8_BOVIN tr|G8JKY0|G8JKY0_BOVIN tr|L8IQM6|L8IQM6_9CETA tr|Q862P8|Q862P8_BOVIN	1	40S ribosomal protein S8 OS=Bos taurus GN=RPS8 PE=2 SV=3;40S ribosomal protein S8 (Fragment) OS=Bos taurus GN=RPS8 PE=1 SV=1;40S ribosomal protein S8 (Fragment) OS=Bos mutus GN=M91_21604 PE=3 SV=1;40S ribosomal protein S8 (Fragment) OS=Bos taurus PE=2 SV=1	41.3	18	0.008	12	0.15	0.02	0.3	0.03	0.5	0.19	0.02	0.32	0.01	IHTVRVR+KYELGRPAANTK+LDVGNFSWGSECCTR+NCIVLIDSTPYR+QWYESHYALPLGR
599	sp|Q5E964|PSD13_BOVIN tr|G8JKV6|G8JKV6_BOVIN tr|L8HR52|L8HR52_9CETA	1	26S proteasome non-ATPase regulatory subunit 13 OS=Bos taurus GN=PSMD13 PE=2 SV=1;26S proteasome non-ATPase regulatory subunit 13 (Fragment) OS=Bos taurus GN=PSMD13 PE=4 SV=1;26S proteasome non-ATPase regulatory subunit 13 OS=Bos mutus GN=M91_08502 PE=4 SV=1	19.7	4	0.001	1	0.22	99.99	0.26	99.99	0.846154	0.19	99.99	0.33	99.99	GSIDEVDKR+GSIDEVDKRVHMTWVQPR+QMTDPNVALSFLEKTR+VKSSDEAVILCKTAIGALK+VNPLSLVEIILHVVR
600	sp|Q5E977|F118B_BOVIN tr|F1N022|F1N022_BOVIN	1	Protein FAM118B OS=Bos taurus GN=FAM118B PE=2 SV=1;Protein FAM118B (Fragment) OS=Bos taurus GN=FAM118B PE=4 SV=2	23.8	7	0.003	5	0.16	0.02	0.35	0.03	0.457143	0.15	0.03	0.3	0.02	HKSDLEHFMLVR+LSVLHIHGVYTNPSGIVLHPAGYQNVLR+LTCEISTR+RLTCEISTRGR
601	sp|Q5E9B6|NR1H3_BOVIN tr|L8IG65|L8IG65_9CETA	1	Oxysterols receptor LXR-alpha OS=Bos taurus GN=NR1H3 PE=2 SV=1;Oxysterols receptor LXR-alpha OS=Bos mutus GN=M91_11662 PE=3 SV=1	17.5	5	0.002	2	0.18	0.04	0.39	0.05	0.461538	0.19	0.04	0.22	0.05	CRQAGMREECVLSEEQIR+EESSTPQSAGDTSR+MLGNELCSVCGDK+MLGNELCSVCGDKASGFHYNVLSCEGCKGFFR+QAGMREECVLSEEQIR+QEEEQAQATSAPPR
602	sp|Q5E9F5|TAGL2_BOVIN tr|L8IU42|L8IU42_9CETA	1	Transgelin-2 OS=Bos taurus GN=TAGLN2 PE=2 SV=3;Transgelin (Fragment) OS=Bos mutus GN=M91_03140 PE=3 SV=1	34.2	182	0.088	58	0.2	0.01	0.26	0.01	0.769231	0.19	0.01	0.28	0.01	ENFQNWLK+GASQAGMTGYGMPR+IQASTMAFK+IQASTMAFKQMEQISQFLQAAER+NVIGLQMGTNR+QMEQISQFLQAAER+TLMNLGGLAVAR
603	sp|Q5E9F9|PRS7_BOVIN tr|L8IKB7|L8IKB7_9CETA	1	26S protease regulatory subunit 7 OS=Bos taurus GN=PSMC2 PE=2 SV=3;26S protease regulatory subunit 7 OS=Bos mutus GN=M91_11963 PE=3 SV=1	43	13	0.004	6	0.15	0.03	0.28	0.04	0.535714	0.17	0.03	0.35	0.02	DIRFELLAR+DIRFELLARLCPNSTGAEIR+GVLLFGPPGTGKTLCAR+GVLLFGPPGTGKTLCARAVANR+IEFSLPDLEGR+IHARSMSVERDIR+IINADSEDPK+INELTGIK+LCPNSTGAEIR+MVRELFEMARTK+QIKQVEDDIQQLLK+QIKQVEDDIQQLLKK+QVEDDIQQLLKKINELTGIK+SVCTEAGMFAIR+THIFKIHARSMSVER+TLCARAVANRTDACFIR+TMLELINQLDGFDPR+VIGSELVQK+VLMATNRPDTLDPALMRPGR+VLMATNRPDTLDPALMRPGRLDR+YVGEGARMVR
604	sp|Q5E9G0|GSTA4_BOVIN tr|L8I479|L8I479_9CETA tr|Q32L24|Q32L24_BOVIN	1	Glutathione S-transferase A4 OS=Bos taurus GN=GSTA4 PE=2 SV=1;Glutathione S-transferase OS=Bos mutus GN=M91_10026 PE=3 SV=1;Glutathione S-transferase OS=Bos taurus GN=GSTA4 PE=2 SV=1	19.4	4	0.001	2	0.1	0.1	0.36	0	0.277778	0.23	0.02	0.25	0.12	EVANMAQK+EVANMAQKAIIR+ISNIPTIKKFLEPGSK+KFLEPGSK+KFLEPGSKK+LHYPNGRGRMESVR
605	sp|Q5E9G4|TRI10_BOVIN tr|F1MTR5|F1MTR5_BOVIN	1	Tripartite motif-containing protein 10 OS=Bos taurus GN=TRIM10 PE=2 SV=1;Tripartite motif-containing protein 10 OS=Bos taurus GN=TRIM10 PE=4 SV=2	20.7	12	0.004	6	0.23	0.01	0.26	0.01	0.884615	0.23	0.02	0.27	0	DEFDVLVTGEIGR+EMKMFLEK+ENRRIQVLLTQVATK+FDRATCVLAHGGFTGGR+IQVLLTQVATKK+KPVAISPELGQRIR+LLLSEDYQQAR+LSFELDYEPAHISLDPRTSHPK+RIQVLLTQVATKK+TSHPKLLLSEDYQQAR
606	sp|Q5E9H5|BCS1_BOVIN tr|L8IXS5|L8IXS5_9CETA	1	Mitochondrial chaperone BCS1 OS=Bos taurus GN=BCS1L PE=2 SV=1;Mitochondrial chaperone BCS1 OS=Bos mutus GN=M91_13933 PE=3 SV=1	30.1	13	0.005	8	0.21	0.02	0.24	0.02	0.875	0.21	0.03	0.3	0.03	DIREFIDNPK+DLAAENPIKYQGLGR+DNPYFGAGFGLVGVGTALALARK+EYVGHCSRWQLTQMFQR+HYMITLEVPARDR+LDPALIRPGR+MPLSDFVLALK+TQHLSVETTYLQHESGR+VFFNILEEAR
607	sp|Q5E9H9|ABHDA_BOVIN tr|L8I903|L8I903_9CETA	1	Mycophenolic acid acyl-glucuronide esterase, mitochondrial OS=Bos taurus GN=ABHD10 PE=2 SV=1;Abhydrolase domain-containing protein 10, mitochondrial OS=Bos mutus GN=M91_10275 PE=4 SV=1	12.4	2	0.001	2	0.24	0.07	0.32	0.08	0.75	0.16	0.03	0.25	0.03	EIEMKGVWPMPSK+NSDHRMK+TSISFLSRPDLPNLAYKR
608	sp|Q5E9J8|RIC8A_BOVIN tr|L8HQE9|L8HQE9_9CETA	1	Synembryn-A OS=Bos taurus GN=RIC8A PE=2 SV=1;Synembryn-A OS=Bos mutus GN=M91_08504 PE=4 SV=1	15.8	9	0.002	1	0.15	99.99	0.36	99.99	0.416667	0.13	99.99	0.36	99.99	DRSCLDSFTSRR+HLGTLLR+ILSRDRSCLDSFTSR+LLFLLTALRTDVR+LMTHLDTDVK+LVNMFDKLSR+QQLFQELQGVRLLTRALELTLGMTEGER+SCLDSFTSR
609	sp|Q5E9M8|SFXN1_BOVIN tr|L8HWZ4|L8HWZ4_9CETA	1	Sideroflexin-1 OS=Bos taurus GN=SFXN1 PE=2 SV=3;Sideroflexin-1 (Fragment) OS=Bos mutus GN=M91_19124 PE=4 SV=1	30.2	3	0.001	0	-9	-9	-9	-9	1	-9	-9	-9	-9	IRETYPELRR+MILIGRMSAQVPMNMTITGCMMTFYR+QAITQVVVSRILMAAPGMAIPPFIMNTLEK+QGIIPSGLTENELWR
610	sp|Q5E9N5|CLPB_BOVIN tr|L8INN0|L8INN0_9CETA	1	Caseinolytic peptidase B protein homolog OS=Bos taurus GN=CLPB PE=2 SV=1;Caseinolytic peptidase B protein-like protein OS=Bos mutus GN=M91_03534 PE=4 SV=1	41.7	23	0.004	5	0.28	0.04	0.22	0.05	1.27273	0.09	0.06	0.32	0.03	AAVGGRHGTSPALLTGGGAATGGR+DAALMEAAR+DAALMEAARANNVQEVSR+DAIFIMTSNVASDEIAQHALQLRQEALEMSR+ELLDGGANPLQR+EVADVLVEGYNVHYGARSIKHEVER+HGTSPALLTGGGAATGGR+ITVEDSDK+LDIQAPLHPEKVCHTL+LDMSEFQER+LDMSEFQERHEVAK+LGWTALMVAAINR+LLLQLLRSPSLR+LLSEGADVNARHR+QCPNAVVLFDEVDKAHPDVLTIMLQLFDEGRLTDGK+QEALEMSRNR+QTAKYMHKDAK+RDEFLGR+RTAPAPRLLLQLLR+SHESATGQSVTTGGR+SPSSKDAALMEAAR+TETPCLAAATWGR+TPIDYAR
611	sp|Q5E9P5|PAMR1_BOVIN tr|F1MUJ4|F1MUJ4_BOVIN tr|L8IXL1|L8IXL1_9CETA	1	Inactive serine protease PAMR1 OS=Bos taurus GN=PAMR1 PE=2 SV=1;Inactive serine protease PAMR1 OS=Bos taurus GN=PAMR1 PE=3 SV=1;Inactive serine protease PAMR1 (Fragment) OS=Bos mutus GN=M91_01247 PE=3 SV=1	16.5	13	0.006	10	0.18	0.02	0.31	0.01	0.580645	0.21	0.02	0.28	0.02	DGDSSDSQIIK+DGDSSDSQIIKR+KVLPMQVQSR+MSTRVQPICLAAPR+NGSWGGTLDDFYVKGIYCAECR+RAGGVHGGGLHK+TADLKVVLGKFYR+TCSHSLSTAFTKVLPFKDWIER+TENVSAPKTQGTR
612	sp|Q5E9R3|EHD1_BOVIN tr|F1N6N3|F1N6N3_BOVIN tr|L8IPX6|L8IPX6_9CETA	1	EH domain-containing protein 1 OS=Bos taurus GN=EHD1 PE=1 SV=1;EH domain-containing protein 1 (Fragment) OS=Bos taurus GN=EHD1 PE=4 SV=2;EH domain-containing protein 1 (Fragment) OS=Bos mutus GN=M91_15968 PE=4 SV=1	24.5	9	0.003	3	0.26	0.04	0.2	0.04	1.3	0.13	0.07	0.36	0.02	DIQSLPRNAALR+EHQISPGDFPNLR+ITGANAKKEMVK+KEMPNVFGK+KEMPNVFGKESK+LFEAEEQDLFKDIQSLPR+LFEAEEQDLFKDIQSLPRNAALR+LPNTVLGK+SKLPNTVLGKIWK+VYIGSFWSHPLLIPDNR
613	sp|Q5E9T4|TPK1_BOVIN tr|L8I8X4|L8I8X4_9CETA	1	Thiamin pyrophosphokinase 1 OS=Bos taurus GN=TPK1 PE=2 SV=1;Thiamin pyrophosphokinase 1 (Fragment) OS=Bos mutus GN=M91_02332 PE=4 SV=1	20.1	7	0.003	0	-9	-9	-9	-9	1	-9	-9	-9	-9	ACADGGANHLYDVTEGER+DLQVDMIVTLGGLAGR+IEEKDLQVDMIVTLGGLAGR+KIEEKDLQVDMIVTLGGLAGR
614	sp|Q5E9T9|RTCB_BOVIN	1	tRNA-splicing ligase RtcB homolog OS=Bos taurus GN=RTCB PE=2 SV=1	26.5	10	0.003	3	0.16	0.03	0.33	0.03	0.484848	0.17	0.06	0.31	0.07	DLEEALEMGVDWSLR+DLEEALEMGVDWSLREGYAWAEDK+EQLAQAMFDHIPVGVGSK+EQLAQAMFDHIPVGVGSKGVIPMNAK+GGGVGGFLPAMKQIGNVAALPGIVHR+GMAAAGNYAWVNR+ISKNCWRIK+LADMGIAIRVASPK+LVMEEAPESYK+QIGNVAALPGIVHR+RNLDFQDVLDKLADMGIAIR+VASPKLVMEEAPESYK
615	sp|Q5E9V1|DCNL3_BOVIN tr|L8IMZ3|L8IMZ3_9CETA	1	DCN1-like protein 3 OS=Bos taurus GN=DCUN1D3 PE=2 SV=1;DCN1-like protein OS=Bos mutus GN=M91_09108 PE=4 SV=1	32.6	19	0.004	5	0.15	0.02	0.3	0.04	0.5	0.18	0.05	0.31	0.05	CKNPSSTLGSK+DPSSKSHGR+DPSSKSHGRR+EFFDGCKAISADSIDGICAR+EPKSNAEESSLQR+MGQCVTKCKNPSSTLGSK+NPSSTLGSK+REGEGRGALSSGPEGLCPEEQT+YKDEREDAILEEGMER
616	sp|Q5E9W5|G3ST4_BOVIN tr|F1N039|F1N039_BOVIN tr|L8INX5|L8INX5_9CETA	1	Galactose-3-O-sulfotransferase 4 OS=Bos taurus GN=GAL3ST4 PE=2 SV=1;Galactose-3-O-sulfotransferase 4 OS=Bos taurus GN=GAL3ST4 PE=4 SV=1;Galactose-3-O-sulfotransferase 4 OS=Bos mutus GN=M91_05949 PE=4 SV=1	17	11	0.003	5	0.18	0.03	0.26	0.03	0.692308	0.19	0.08	0.27	0.06	KAPSLAAFLANPR+LDAKQFPPTVSLPLK+LDSAVAELR+LDSAVAELRAR+LDSAVAELRARR+QYGQSRLDSAVAELR+SGLSLQDQEECER+THKSGSSSVLSLLHR+TMRLWGPR
617	sp|Q5EA06|GBRP_BOVIN tr|L8HP57|L8HP57_9CETA	1	Gamma-aminobutyric acid receptor subunit pi OS=Bos taurus GN=GABRP PE=2 SV=1;Gamma-aminobutyric acid receptor subunit pi OS=Bos mutus GN=M91_03254 PE=3 SV=1	23	5	0.002	2	0.35	0.02	0.22	0	1.59091	0.11	0.07	0.29	0.06	AKEVEEVNITNIINSSISSFK+ISFASIEISGDNVDYSDLTMK+LFSNGTVLYALR+LIRLFSNGTVLYALR+LVLQFELQR+RSLHLTFVCLSLFSAR+TCIGVTTVLSMTTLMIGSR
618	sp|Q5EA28|CXXC1_BOVIN tr|L8HWE2|L8HWE2_9CETA	1	CXXC-type zinc finger protein 1 OS=Bos taurus GN=CXXC1 PE=2 SV=1;CpG-binding protein (Fragment) OS=Bos mutus GN=M91_16708 PE=4 SV=1	17.2	28	0.006	7	0.17	0.01	0.31	0.02	0.548387	0.19	0.01	0.32	0.01	DGSEPRDEGGGR+DPASLPQCLGPGCVR+DSSERDGSEPRDEGGGR+DVFELTGDFCR+EWYCRECR+FHELEAIILRAKQQAVR+LDELFEQERNVRTAMTNR+NVRTAMTNR+RAGAGTGVGAMLAR+RSARMCGECEACR
619	sp|Q5EA41|GALT6_BOVIN tr|A6H6Z5|A6H6Z5_BOVIN	1	Polypeptide N-acetylgalactosaminyltransferase 6 OS=Bos taurus GN=GALNT6 PE=2 SV=1;Polypeptide N-acetylgalactosaminyltransferase OS=Bos taurus GN=GALNT6 PE=2 SV=1	24.3	10	0.004	5	0.15	0.04	0.28	0.03	0.535714	0.24	0.02	0.29	0.03	DETYPIKSPTFAGGLFSISK+DHVLDLMLGAVHNLR+DHVLDLMLGAVHNLRDSMPKFQIR+LVMVGSAFVLFLFILQRDVSGR+NLQAAQMAR+NLQAAQMAREK+NSGSGTCLTSKDK+QLCLHASAGTLGLR+QLCLHASAGTLGLRSCHFTGK+QLQVVQVVRQQER+SFGDISERLQLR+SPTFAGGLFSISK+TVYSVLHTTPAILLK
620	sp|Q5EA43|SFXN2_BOVIN tr|L8J2W0|L8J2W0_9CETA	1	Sideroflexin-2 OS=Bos taurus GN=SFXN2 PE=2 SV=2;Sideroflexin OS=Bos mutus GN=M91_06644 PE=3 SV=1	33.2	6	0.002	3	0.17	0.05	0.29	0.05	0.586207	0.15	0.03	0.36	0.05	ITMAAPGMILLPVLMERLEK+KLYDSAFHPDTGHKMNVIGR+NAASPTSVR+NAASPTSVRQMAVSYITATTTAVATAVGMNMLTK+QQELIQGICVKDR+TVLVPERELDWAKVMVEQSR
621	sp|Q5EA46|CREL1_BOVIN tr|F1N3P8|F1N3P8_BOVIN tr|L8HYD5|L8HYD5_9CETA tr|Q2TBR4|Q2TBR4_BOVIN	1	Cysteine-rich with EGF-like domain protein 1 OS=Bos taurus GN=CRELD1 PE=2 SV=1;Cysteine-rich with EGF-like domain protein 1 OS=Bos taurus GN=CRELD1 PE=4 SV=1;Cysteine-rich with EGF-like domain protein 1 OS=Bos mutus GN=M91_07182 PE=4 SV=1;Cysteine-rich with EGF-like domains 1 OS=Bos taurus GN=CRELD1 PE=2 SV=2	13	4	0.001	1	0.14	99.99	0.38	99.99	0.368421	0.15	99.99	0.33	99.99	DCAKACLGCMGAGPGR+DNFGGGNTAWEEEKLSK+KCSPGYQQVGSK+QMEGICVK
622	sp|Q5EA53|T2FA_BOVIN tr|L8I6D2|L8I6D2_9CETA	1	General transcription factor IIF subunit 1 OS=Bos taurus GN=GTF2F1 PE=2 SV=1;General transcription factor IIF subunit 1 (Fragment) OS=Bos mutus GN=M91_11280 PE=4 SV=1	25.4	50	0.01	14	0.22	0.02	0.23	0.02	0.956522	0.24	0.02	0.27	0.02	HRTLTAEEAEEEWERR+KPMTTKDLLK+KTGLSSEQTVNVLAQILKR+KYNIMAFNAADK+LDTGPQSLSGK+LDTGPQSLSGKSTPQPQSGK+LEQGKRTSETPAAK+LNPERKMINDK+NKVLNHFSIMQQRR+RTSETPAAKR+RYLTRKPMTTK+TGLSSEQTVNVLAQILK+TGLSSEQTVNVLAQILKR+TLTAEEAEEEWERR+TPPKRER+VLNHFSIMQQRRLK
623	sp|Q5EA77|SNX17_BOVIN tr|L8IMS9|L8IMS9_9CETA	1	Sorting nexin-17 OS=Bos taurus GN=SNX17 PE=2 SV=1;Sorting nexin-17 (Fragment) OS=Bos mutus GN=M91_00177 PE=4 SV=1	27.6	11	0.003	2	0.11	0.01	0.31	0.07	0.354839	0.2	0.14	0.32	0.08	EDGAFSFVR+EDGAFSFVRK+ESMVKLSSKLSAVSLR+KEFLRLAQTLR+KEYGANVLPAFPPK+KSYWDSAYDDDVMENR+LQEFELPYVSVTSLR+LSSKLSAVSLR+REQLEKYMQAVR+SDSQQAVKSPPLLESPDASR+SGGSIRKMLR
624	sp|Q5EA88|GPDA_BOVIN tr|L8IU90|L8IU90_9CETA	1	Glycerol-3-phosphate dehydrogenase [NAD(+)], cytoplasmic OS=Bos taurus GN=GPD1 PE=2 SV=3;Glycerol-3-phosphate dehydrogenase [NAD(+)] (Fragment) OS=Bos mutus GN=M91_16713 PE=3 SV=1	31.2	21	0.005	7	0.17	0.01	0.32	0.01	0.53125	0.2	0.02	0.29	0.01	ADTIGVSLIKGVDEGPK+ADTIGVSLIKGVDEGPKGLK+FCETTIGSK+ICDQLKGHLK+ITVVQEVDTVEICGALK+IVGGNAAQLAHFDPRVTMWVFEEDIGGR+KVCIVGSGNWGSAIAK+NQAHGQLLK+VTMWVFEEDIGGR
625	sp|Q5EA98|MFAP1_BOVIN tr|L8IQN9|L8IQN9_9CETA	1	Microfibrillar-associated protein 1 OS=Bos taurus GN=MFAP1 PE=2 SV=1;Microfibrillar-associated protein 1 (Fragment) OS=Bos mutus GN=M91_01185 PE=4 SV=1	13	9	0.003	3	0.16	0.01	0.31	0.04	0.516129	0.18	0.02	0.35	0.02	DVFERPSAK+DVFERPSAKKR+ISEDVEERLARHR+NEELEVMEVEDEGR+NEKGEISMEKVK+RGMMRQR
626	sp|Q5EAC9|HSPB8_BOVIN tr|L8IG35|L8IG35_9CETA	1	Heat shock protein beta-8 OS=Bos taurus GN=HSPB8 PE=2 SV=1;Heat shock protein beta-8 OS=Bos mutus GN=M91_16453 PE=3 SV=1	28.1	16	0.004	7	0.19	0.02	0.3	0.02	0.633333	0.19	0.02	0.3	0.02	DGYVEVSGK+DGYVEVSGKHEEKQQEGGIVSK+GPTAMTRFGVPAEGR+LSSAWPGTLR+LSSAWPGTLRSGMVPR+SGMVPRGPTAMTR+TKDGYVEVSGK
627	sp|Q5XQN5|K2C5_BOVIN tr|A5D7M6|A5D7M6_BOVIN tr|L8HXV9|L8HXV9_9CETA tr|M0QVZ6|M0QVZ6_BOVIN	1	Keratin, type II cytoskeletal 5 OS=Bos taurus GN=KRT5 PE=1 SV=1;KRT5 protein OS=Bos taurus GN=KRT5 PE=1 SV=1;Keratin, type II cytoskeletal 5 (Fragment) OS=Bos mutus GN=M91_10642 PE=3 SV=1;Keratin, type II cytoskeletal 5 OS=Bos taurus GN=KRT5 PE=1 SV=1	37.3	89	0.039	39	0.18	0.01	0.28	0.01	0.642857	0.19	0.01	0.31	0.01	AQYEDIANR+HEISEMNRMIQR+LAELEDALQKAK+LLEGEECR+LRSEIDNVKK+NKYEDEINK+NKYEDEINKR+QCANLQNAIADAEQR+QLDGIVGER+QNLEPLLEQYINNLR+QSTVSFRSGGGR+SEIDNVKKQCANLQNAIADAEQR+SFSTASAITPSVSR+SGGGGGGGFGR+SGGGRSFSTASAITPSVSR+SKLAELEDALQKAK+SLDLDSIIAEVK+SLYNLGGSK+TLNNKFASFIDKVR+TTAENEFVMLK+VSDTSVVLSMDNNR+VSLGGAYGAGGFGSR
629	sp|Q6TJY3|KS6B1_BOVIN tr|F1MNP4|F1MNP4_BOVIN tr|L8ITP0|L8ITP0_9CETA	1	Ribosomal protein S6 kinase beta-1 OS=Bos taurus GN=RPS6KB1 PE=2 SV=1;Ribosomal protein S6 kinase OS=Bos taurus GN=RPS6KB1 PE=3 SV=1;Ribosomal protein S6 kinase beta-1 (Fragment) OS=Bos mutus GN=M91_15751 PE=4 SV=1	31.4	20	0.005	5	0.19	0.05	0.37	0.06	0.513514	0.17	0.04	0.19	0.03	EKFSFEPKIR+FEISETSVNR+FEISETSVNRGPEK+FIGSPRTPVSPVKFSPGDFWGR+GGYGKVFQVR+HINWEELLAR+ITDFGLCK+LLKRNAASR+LNLPPYLTQEAR+NAASRLGAGPGDAGEVQAHPFFR+NAKDTAHTKAER+QPNSGPYKKQAFPMISK+VTGANTGKIFAMKVLK
631	sp|Q6UC88|LYVE1_BOVIN tr|A5D7P9|A5D7P9_BOVIN tr|L8IF39|L8IF39_9CETA	1	Lymphatic vessel endothelial hyaluronic acid receptor 1 OS=Bos taurus GN=LYVE1 PE=1 SV=1;LYVE-1 protein OS=Bos taurus GN=LYVE-1 PE=2 SV=1;Lymphatic vessel endothelial hyaluronic acid receptor 1 OS=Bos mutus GN=M91_06770 PE=4 SV=1	26.4	10	0.003	2	0.28	0.07	0.06	0.07	4.66667	0.15	0.1	0.44	0.03	CGKSGVGVVIWRSSLSSR+EMIETKVVKEEK+FFSLGLLLASIWTTRLLVQGSLR+FGFETCSYGWVK+IMGVTLVTK+MAKFFSLGLLLASIWTTR+NQFVVIPR
634	sp|Q75WB5|OPLA_BOVIN tr|F1ME97|F1ME97_BOVIN	1	5-oxoprolinase OS=Bos taurus GN=OPLAH PE=1 SV=1;5-oxoprolinase OS=Bos taurus GN=OPLAH PE=4 SV=1	23.6	41	0.015	23	0.17	0.01	0.3	0.02	0.566667	0.16	0.01	0.31	0.02	AFQPYGLMGGEPGAR+AFQPYGLMGGEPGARGLNLLIR+AGDFGAAFVERYMR+DMLRAFGTAR+DNLSDLR+DRPLDTSR+DRPLDTSRIASIR+DVQVLFMR+EEALLSVLTERRAFQPYGLMGGEPGAR+ELGFTHVSLSSEAMPMVR+FELRLGSGGR+FELRLGSGGRGR+FMSIAEQMGR+GCTGDLLEVQQPVDLGGLR+GLNLLIRKDGR+GSVYEYRR+KGGPVTVTDANLVLGR+LGSGGRGRFR+LLPASFPCIFGPGEDQPLSPEASR+MGGPEGRFHFAIDRGGTFTDVFAQCPGGHVR+NLHDNLSDLR+SDGGLAPMDSFSGSR+SGVHSHMTNTR+SQISTESFLHLRYQGTDCALMVSAHQHPASARSPR+TAISTNIKER
635	sp|Q76BS1|HGF_BOVIN tr|F1MZD6|F1MZD6_BOVIN tr|L8IY98|L8IY98_9CETA	1	Hepatocyte growth factor OS=Bos taurus GN=HGF PE=2 SV=1;Hepatocyte growth factor OS=Bos taurus GN=HGF PE=3 SV=2;Hepatocyte growth factor (Fragment) OS=Bos mutus GN=M91_06788 PE=3 SV=1	27.8	12	0.004	5	0.15	0.02	0.33	0.04	0.454545	0.13	0.05	0.33	0.03	CQPWNSMIPHEHSFLPSSYR+DYEAWLGIHDVHGR+ENYCRNPDGAESPWCFTTDPNIR+GGSYKGTVSITKSGIK+HICGGSLIK+MNTADQCANRCIR+MRMVLGVIVPGR+MVLGVIVPGR+MVLGVIVPGRGCAIPNRPGIFVR+NKHICGGSLIK+NMEDLHR+NTLHEFKR+RCLWFPFNSMSSGVK+SGLTCSMWDK+TRSGLTCSMWDKNMEDLHR+VAHLYIMGNEK+VVNGIPTRTNVGWMVSLKYR
639	sp|Q862I1|RL24_BOVIN tr|Q862D6|Q862D6_BOVIN	1	60S ribosomal protein L24 OS=Bos taurus GN=RPL24 PE=2 SV=2;Similar to ribosomal protein L30 (Fragment) OS=Bos taurus PE=2 SV=1	58.6	10	0.003	3	0.17	0.03	0.31	0.04	0.548387	0.2	0.02	0.31	0.01	AITGASLADIMAKRNQKPEVR+AQREQAIR+FQRAITGASLADIMAKR+QINWTVLYR+QKIVKPVKVSAPR+RNPRQINWTVLYR+TAMAAAKAPTKAAPK+VSAPRVGGKR
640	sp|Q863B3|SND1_BOVIN tr|L8IMU8|L8IMU8_9CETA	1	Staphylococcal nuclease domain-containing protein 1 OS=Bos taurus GN=SND1 PE=1 SV=1;Uncharacterized protein OS=Bos mutus GN=M91_17741 PE=4 SV=1	22.4	28	0.007	3	0.11	0.05	0.28	0.08	0.392857	0.17	0.01	0.39	0.03	DLKYTIENPR+EGLVMVEVRKEK+EVCFTIENKTPQGR+GAEKLRAAER+GDVGLGLVKEGLVMVEVR+GGPPPERQINLSNIR+GIVKMVLSGCAIIVR+KGMWSEGNGSHTIR+KLRPLYDIPYMFEAR+MVLSGCAIIVR+MVLSGCAIIVRGQPR+NDIASHPPVEGSYAPRR+QFLPFLQR+READGSETPEPFAAEAK+SEAVVEYVFSGSRLKLYLPK+SSHYDELLAAEAR+TIHLSSIRPPR
641	sp|Q865R3|BASI_BOVIN	1	Basigin (Fragment) OS=Bos taurus GN=BSG PE=2 SV=1	14.1	9	0.004	7	0.19	0.01	0.29	0.01	0.655172	0.19	0.01	0.33	0.01	AVKSSEHINEGETAMLVCK+GSDQAIITLR
642	sp|Q865S1|AP3D1_BOVIN tr|L8J302|L8J302_9CETA	1	AP-3 complex subunit delta-1 OS=Bos taurus GN=AP3D1 PE=1 SV=2;AP-3 complex subunit delta-1 OS=Bos mutus GN=M91_18669 PE=4 SV=1	16.5	24	0.006	13	0.18	0.04	0.22	0.04	0.818182	0.17	0.04	0.27	0.04	APEADEQELAR+DLVLQCLDDK+DLVLQCLDDKDESIR+EDVPLVEKK+EGQEEPR+GSIDRMFDK+HGHLIAAQMLDVAIR+HTKPRAPEADEQELAR+LMTHVDKAEGTTYR+LMTSSTNNWVLIK+LPVQKHR+NDEGSTHEKLDFK+NLMEIVK+NLMEIVKK+NLQDLVRGIR+QEQANNPFYIK+SIQGHHVCLLVKK+SMELNVLDSLNAR+YISQCIDEIKQELK+YLGLLAMSKILR
643	sp|Q865V6|CAPG_BOVIN tr|L8IRV6|L8IRV6_9CETA	1	Macrophage-capping protein OS=Bos taurus GN=CAPG PE=2 SV=1;Macrophage-capping protein (Fragment) OS=Bos mutus GN=M91_17790 PE=4 SV=1	6.6	27	0.014	18	0.18	0.02	0.31	0.02	0.580645	0.15	0.01	0.33	0.01	QAALQVAEDFITR+TNAQAAALYK
644	sp|Q866T7|CXD2_BOVIN tr|L8IT92|L8IT92_9CETA	1	Gap junction delta-2 protein OS=Bos taurus GN=GJD2 PE=2 SV=1;Gap junction protein OS=Bos mutus GN=M91_16479 PE=3 SV=1	23.7	19	0.004	5	0.21	0.01	0.3	0.01	0.7	0.17	0.03	0.3	0.03	DLPRVSVPNFGR+ETEPDCLEVKELTPHPSGLRTASR+LLEAAVQQHSTMIGR+QEGISRFYIIQVVFR+YSTVFLALDR
648	sp|Q8HXA6|ASB15_BOVIN tr|L8IN75|L8IN75_9CETA	1	Ankyrin repeat and SOCS box protein 15 OS=Bos taurus GN=ASB15 PE=2 SV=2;Ankyrin repeat and SOCS box protein 15 OS=Bos mutus GN=M91_16750 PE=4 SV=1	20.2	24	0.007	9	0.14	0.03	0.32	0.03	0.4375	0.18	0.02	0.28	0.02	DIIALLLNNGGNVHLK+GSYDMVSALLK+HNTSLDQPCVKR+LCQPTLMEKLSLPPTIQR+LMGLQRLCQPTLMEK+NDKGETPLLLAIK+TSDGETPLTLAVKAGLVENVR+VLIDYMDYIPLCAK+YLIPVTSK
649	sp|Q8HYW0|FA13A_BOVIN tr|L8IFC0|L8IFC0_9CETA	1	Protein FAM13A OS=Bos taurus GN=FAM13A PE=2 SV=1;Protein FAM13A (Fragment) OS=Bos mutus GN=M91_13342 PE=4 SV=1	13.2	8	0.003	6	0.18	0.03	0.25	0.04	0.72	0.22	0.04	0.29	0.04	EIKEEEEGSEDDNYTKPDFMVTLK+ISEEDLPPR+ISEEDLPPRMR+KLRDFEDNFFR+LKISEEDLPPRMR+LRLLEVLISKR+LVKQILSR+QRSNTLPKSFGSQLEK+QVMKPLYDR
650	sp|Q8HYY4|UACA_BOVIN tr|F1MKQ9|F1MKQ9_BOVIN tr|F1N101|F1N101_BOVIN	1	Uveal autoantigen with coiled-coil domains and ankyrin repeats protein OS=Bos taurus GN=UACA PE=1 SV=1;Uveal autoantigen with coiled-coil domains and ankyrin repeats protein OS=Bos taurus GN=UACA PE=4 SV=2;Uveal autoantigen with coiled-coil domains and ankyrin repeats protein OS=Bos taurus GN=UACA PE=4 SV=2	23.7	31	0.009	13	0.15	0.03	0.32	0.03	0.46875	0.13	0.02	0.32	0.02	ALSRKTEELNR+ATKSDLETQISDLNEKLANLNR+DEGKLMEENKR+DLSAKLALSIPAEK+EAFEKEVGIIKASLR+EEESQNK+ELDTIQECIKLK+EMMALKSNITELKK+GDVEKVSSILAK+IGDNLDILTLLKTASENSNKGR+LALSIPAEKFENMK+LKKEILTLQK+LMEELKDQLK+LTEMEGQLK+LTEMEGQLKDLSAK+MSCWFSCAPKNR+NHYVPLKVSEEMK+NLSQMLDEVNTK+NSSVPLAEHLQVK+QAADWNKYDDR+QHQEVIAIYR+QNEMIVEEFK+QSQLIDSLQQQVR+RNLENTQNQVKAEYISLR+TASENSNKGR+THEEIKTALSSTLDK+TPLVLATQMCRPTICQLLIDR+VSSILAKKGVNPGK+YA…
652	sp|Q8MHZ9|CL46_BOVIN tr|E1BEZ9|E1BEZ9_BOVIN	1	Collectin-46 OS=Bos taurus GN=CL46 PE=2 SV=1;Collectin-46 OS=Bos taurus GN=CL46 PE=4 SV=2	15.9	6	0.002	2	0.16	0.06	0.28	0	0.571429	0.27	0.03	0.28	0.02	EGPQGEKGDPGSPGPAGR+GDTGPKGGMGAPGMQGSPGPAGLK+GGMGAPGMQGSPGPAGLK+GPPGMPGPAGR+GPPGMPGPAGREGPSGK
653	sp|Q8MI28|LBN_BOVIN tr|E1BES3|E1BES3_BOVIN	1	Limbin OS=Bos taurus GN=EVC2 PE=2 SV=1;Limbin OS=Bos taurus GN=EVC2 PE=4 SV=2	24.5	21	0.003	5	0.17	0.02	0.35	0.05	0.485714	0.18	0.02	0.26	0.04	AGYLDEDQMQVLLERAQTEVFSIKQK+DIIALLLK+DLAARAERLEGEER+EMLQKHKEQR+EQAPEDLVEKVRGELLR+ERVIFSGK+HERAGYLDEDQMQVLLERAQTEVFSIK+HQDHSVENDGSRVQADLGR+KKFLQVGDSFSVSYTASLEAR+KMVALTAECDLETRK+LDNDLKQEK+LDQAMTAPELQPQSK+LDQAMTAPELQPQSKAR+LDQAMTAPELQPQSKARKPR+LEGEERDR+LQNSGMTQELLKR+LTMLPGGTLR+NELHNIFFTQIK+NFLNAKKAAWALGLN+NLTSSGQLSPQVERR+NPKEPEISLHVPPR+SACMQILESHSPELQELERK+SAVECSSLLRTLHGLEQEHLR+VSERSAVECSSLLR
654	sp|Q8MJ05|RP1_BOVIN tr|F1N1W1|F1N1W1_BOVIN	1	Oxygen-regulated protein 1 OS=Bos taurus GN=RP1 PE=2 SV=1;Uncharacterized protein OS=Bos taurus GN=RP1 PE=4 SV=2	22.6	39	0.007	15	0.14	0.01	0.33	0.02	0.424242	0.16	0.03	0.31	0.02	ALSTHVQRGPAPAAPGMLR+ALTDNAVGNTHVWPHFNNTFDLMDR+ARRRPRPWLSSR+DKCDVNNVR+DKNNKTISR+DLHASDTVIESNYFSSK+DSHSSLKGAILCEK+EDIAEHGTKQNDHKTILR+EPNHPAEEKGNLR+GNNPVNSRNFPR+GRHSITR+IAQETILR+IKEEETIKWTTTLCR+ILRDREEGVLIDK+ISFYKSGDPQFGGVR+ISLDGSHTAGEEVSEVCVTAVTR+KVNSGEQVTEELIR+KVPSLQAVILSSGAVVAAGR+LLKSSAVSAGVVEITSQK+MNTRGRIAQETILR+NDAEEGKDGVICETISR+NDAEEGKDGVICETISRK+NDSILQSNRHTTK+NISTPRGR+NLRTYGNTDDR+QSNCLGLEEENN…
655	sp|Q8MJ24|LOXL4_BOVIN tr|G1K200|G1K200_BOVIN tr|L8IAA7|L8IAA7_9CETA	1	Lysyl oxidase homolog 4 OS=Bos taurus GN=LOXL4 PE=2 SV=1;Lysyl oxidase homolog 4 (Fragment) OS=Bos taurus GN=LOXL4 PE=4 SV=2;Lysyl oxidase-like protein 4 (Fragment) OS=Bos mutus GN=M91_14361 PE=4 SV=1	22	4	0.002	2	0.2	0.01	0.28	0.02	0.714286	0.19	0.05	0.32	0.01	CNIPNMGFQDQVR+CNIPNMGFQDQVRLAGGR+ESRAEEMKVR+FEVAESDFSNNMMRCRCK+HGPVHCSHGTGR+LLRFSSQIHNLGR+LRSGAQVGEGR+QLGFGSAREALFGAQLGQALGPIHLSEVR+SGAQVGEGR+SGAQVGEGRVEVLMNR+VRLRSGAQVGEGR
656	sp|Q8MJG0|R9BP_BOVIN tr|L8IEL5|L8IEL5_9CETA	1	Regulator of G-protein signaling 9-binding protein OS=Bos taurus GN=RGS9BP PE=1 SV=2;Regulator of G-protein signaling 9-binding protein OS=Bos mutus GN=M91_07455 PE=4 SV=1	40.5	23	0.006	6	0.16	0.02	0.3	0.01	0.533333	0.16	0.03	0.36	0.03	AATIFSAVLLAAVALAVCVAKLS+AKAATIFSAVLLAAVALAVCVAK+QAAGAELLSSASAGVSSVGGVSVEQR+SLRHEAHR+TGVEGGATGVAAR+TGVEGGATGVAARALSVR+TGVEGGATGVAARALSVRSLR+TRQKAQELAVAIR+WTVQARQAAGAELLSSASAGVSSVGGVSVEQR
658	sp|Q8SPJ1|PLAK_BOVIN tr|L8ICL6|L8ICL6_9CETA	1	Junction plakoglobin OS=Bos taurus GN=JUP PE=2 SV=1;Junction plakoglobin (Fragment) OS=Bos mutus GN=M91_17162 PE=4 SV=1	23.6	25	0.01	11	0.21	0.03	0.26	0.02	0.807692	0.19	0.01	0.31	0.02	AAMIVNQLSKK+ALMGSPQLVAAVVR+EASRRALMGSPQLVAAVVR+ILVNQLSVDDVNVLTCATGTLSNLTCNNSK+LNTIPLFVQLLYSSVENIQR+LNYGIPAIVK+MAVRLADGLQKMVPLLNK+NEGTATYAAAVLFR+NLSDVATKQEGLESVLK+NPDYRKR+RALMGSPQLVAAVVR+TLVTQNSGVEALIHAILR+TMQNTSDLDTAR
659	sp|Q8SPX7|CRYL1_BOVIN tr|A5D7R4|A5D7R4_BOVIN tr|L8IXT9|L8IXT9_9CETA	1	Lambda-crystallin homolog OS=Bos taurus GN=CRYL1 PE=2 SV=3;CRYL1 protein OS=Bos taurus GN=CRYL1 PE=2 SV=1;Lambda-crystallin-like protein (Fragment) OS=Bos mutus GN=M91_11534 PE=4 SV=1	28.1	8	0.003	2	0.2	0.02	0.24	0.01	0.833333	0.17	0.03	0.38	0.02	AWRDGCLMR+EMKMLELSGYLK+LFDIEPR+QVTDALVSLRKEMK+SWAMLFASAGFRVK+TFGPVPEFSGATAEKVHQAMCVK+TYALMRRVGQSPVR
660	sp|Q8WMV0|GRK7_BOVIN tr|F1MH44|F1MH44_BOVIN tr|L8IYC8|L8IYC8_9CETA	1	G protein-coupled receptor kinase 7 OS=Bos taurus GN=GRK7 PE=1 SV=1;G protein-coupled receptor kinase 7 OS=Bos taurus GN=GRK7 PE=3 SV=1;G protein-coupled receptor kinase 7 OS=Bos mutus GN=M91_12303 PE=3 SV=1	25.7	18	0.004	5	0.2	0.05	0.23	0.06	0.869565	0.23	0.05	0.25	0.05	AEVMAFLQDQPFR+DFLATVPAYQEAR+DICRLFLAKTPEQR+FLQWKVFEMQPVSDK+LEAGLVEPPFVPDPSVVYAK+LQDQPFR+LSDLGLAVQIQDGKPITQR+MALLEKEILER+NGEKMALLEK+NTGKMYACK+RLFRDFLATVPAYQEAR+TPEQRLGSR+VLGKGGFGEVCAVQVK
661	sp|Q8WN55|PTBP1_BOVIN tr|L8HQD8|L8HQD8_9CETA	1	Polypyrimidine tract-binding protein 1 OS=Bos taurus GN=PTBP1 PE=2 SV=1;Polypyrimidine tract-binding protein 1 (Fragment) OS=Bos mutus GN=M91_15528 PE=4 SV=1	13.4	7	0.002	3	0.18	0.03	0.35	0.08	0.514286	0.2	0.04	0.22	0.06	DYGNSPLHRFKKPGSK+ELKTDSSPNQAR+ILFSSNGGIVK+KLPGDVTEGEVISLGLPFGK+SAGVPSRVIHIR+TDSSPNQAR
662	sp|Q95119|TYRP2_BOVIN tr|F1MC37|F1MC37_BOVIN	1	L-dopachrome tautomerase OS=Bos taurus GN=DCT PE=2 SV=2;L-dopachrome tautomerase OS=Bos taurus GN=DCT PE=4 SV=2	21.3	9	0.003	4	0.14	0.07	0.34	0.06	0.411765	0.24	0.04	0.22	0.01	CTGNFAGYNCGNCRFGWTGPKCDQK+DIQNCLSLK+DLQRLTGNESFALPYWNFATGR+LPTLKDIQNCLSLK+LRKGYTPLVETQLSNK+LTGNESFALPYWNFATGR+NQDDRERWPR+NQMGRNSEKLPTLK+VTLCNGTYEGLLKR
663	sp|Q95141|INAR2_BOVIN tr|F1MXT2|F1MXT2_BOVIN tr|L8IPU6|L8IPU6_9CETA	1	Interferon alpha/beta receptor 2 OS=Bos taurus GN=IFNAR2 PE=2 SV=1;Interferon alpha/beta receptor 2 OS=Bos taurus GN=IFNAR2 PE=4 SV=2;Interferon alpha/beta receptor 2 OS=Bos mutus GN=M91_17693 PE=4 SV=1	6.6	6	0.002	2	0.21	0.04	0.38	0	0.552632	0.17	0.01	0.24	0.03	EDMKVVKDCINVTR+IGYICLR+INRSPLKCTLFRPR
664	sp|Q95JC7|AAAT_BOVIN tr|A0A0A8J2N9|A0A0A8J2N9_BOVIN tr|F1MTV5|F1MTV5_BOVIN tr|L8I870|L8I870_9CETA	1	Neutral amino acid transporter B(0) OS=Bos taurus GN=SLC1A5 PE=2 SV=1;Amino acid transporter OS=Bos taurus GN=ASCT2 PE=2 SV=1;Neutral amino acid transporter B(0) OS=Bos taurus GN=SLC1A5 PE=4 SV=2;Amino acid transporter (Fragment) OS=Bos mutus GN=M91_02215 PE=3 SV=1	17.1	15	0.005	8	0.17	0.01	0.33	0.04	0.515152	0.11	0.02	0.34	0.03	CVEEKNGVARHISR+GDPKGYAAAEPTANGVSMLVPIEDVGSLKGGR+GGRCGSGDQVR+GGRCGSGDQVRR+GYAAAEPTANGVSMLVPIEDVGSLK+KLGPEGELLIR+LEAFSFPGELLLR+NIFPSNLVSAAFR
665	sp|Q95KV0|IKKB_BOVIN tr|A0JNJ0|A0JNJ0_BOVIN tr|L8I6C2|L8I6C2_9CETA	1	Inhibitor of nuclear factor kappa-B kinase subunit beta OS=Bos taurus GN=IKBKB PE=2 SV=1;IKBKB protein OS=Bos taurus GN=IKBKB PE=2 SV=1;Inhibitor of nuclear factor kappa-B kinase subunit beta OS=Bos mutus GN=M91_05777 PE=4 SV=1	21.1	14	0.004	5	0.2	0.04	0.26	0.01	0.769231	0.19	0.02	0.33	0.02	EGAILTLLSDIASALR+LDFFKTSIQIDLEKYR+LNEGRTLDMDLVFLFDNSR+LQQGQRAAMMNLLR+NRERWCLEIQIMR+NSMASMSQQLK+NSMASMSQQLKAK+QCRQELSPRNR+QGGTLDDLEEQARELYR+QKELWNLLK+QKSEMDIVVSEDLNGAVK+RLNHPNVVAAR+WCLEIQIMRRLNHPNVVAAR
666	sp|Q95LA0|FATE1_BOVIN tr|L8IZJ7|L8IZJ7_9CETA	1	Fetal and adult testis-expressed transcript protein homolog OS=Bos taurus GN=FATE1 PE=2 SV=1;Fetal and adult testis-expressed transcript protein-like protein OS=Bos mutus GN=M91_01335 PE=4 SV=1	17.8	8	0.003	6	0.2	0.01	0.28	0.02	0.714286	0.21	0.01	0.3	0.02	DEDLLLGSFR+MAGGAVPNLK+MAGGAVPNLKEK+QLFMITER+QLFMITERLR
667	sp|Q95N27|PP16B_BOVIN tr|L8IJ89|L8IJ89_9CETA	1	Protein phosphatase 1 regulatory inhibitor subunit 16B OS=Bos taurus GN=PPP1R16B PE=1 SV=1;Protein phosphatase 1 regulatory inhibitor subunit 16B OS=Bos mutus GN=M91_02791 PE=4 SV=1	21.7	28	0.006	7	0.19	0.03	0.26	0.03	0.730769	0.21	0.03	0.3	0.02	DPNPRLEKPVLLSEFPTK+IPHSDMDMPVENGLR+KEYEGEAILWQQRSASEDQR+KVSFEASVALLEASLR+KVSFEASVALLEASLRNDAEEVR+KWAQYEQDLQHR+NDAEEVR+NDAEEVRYFLKNK+NSTYNGDIRETR+TGEGSSEGKAPLIGGR+WAQYEQDLQHRK
670	sp|Q9BE45|IKBZ_BOVIN tr|E1BAM0|E1BAM0_BOVIN tr|L8IYL1|L8IYL1_9CETA tr|M5AKL7|M5AKL7_BOVIN	1	NF-kappa-B inhibitor zeta OS=Bos taurus GN=NFKBIZ PE=2 SV=2;NF-kappa-B inhibitor zeta OS=Bos taurus GN=NFKBIZ PE=4 SV=1;NF-kappa-B inhibitor zeta (Fragment) OS=Bos mutus GN=M91_03021 PE=4 SV=1;Molecule possessing ankyrin-repeats induced by lipopolysaccharide OS=Bos taurus GN=Mail PE=2 SV=1	14.3	27	0.006	9	0.17	0.01	0.3	0.02	0.566667	0.2	0.02	0.31	0.01	CLIQMGAAVEAK+CLIQMGAAVEAKDR+EQFTELKNTVSYSGK+GSDSLSDGPACK+GSDSLSDGPACKR+NKSLVDTIK+NKSLVDTIKCLIQMGAAVEAK+NLENEQPVHLVPDGPVGEQIR+NTVSYSGK+NTVSYSGKRK+SHKQKASGQAVDDFK+SLVDTIKCLIQMGAAVEAKDR
671	sp|Q9BEG5-2|EDA_BOVIN sp|Q9BEG5|EDA_BOVIN tr|L8IIA6|L8IIA6_9CETA	1	Isoform A2 of Ectodysplasin-A OS=Bos taurus GN=EDA;Ectodysplasin-A OS=Bos taurus GN=EDA PE=3 SV=2;Ectodysplasin-A OS=Bos mutus GN=M91_05877 PE=4 SV=1	23.7	7	0.002	1	0.26	99.99	0.41	99.99	0.634146	0.21	99.99	0.13	99.99	AGEGNSCR+ITMNPKVFKLHPR+MGYPEVERR+MGYPEVERREPLPAAAPR+MVHADISINMSKHTTFFGAIR+MVHADISINMSKHTTFFGAIRLGEAPAS+NDLSGGVLNDWSR+NDLSGGVLNDWSRITMNPK+SSEGADGPVKNK
672	sp|Q9BGI3|PRDX2_BOVIN tr|L8IBK4|L8IBK4_9CETA	1	Peroxiredoxin-2 OS=Bos taurus GN=PRDX2 PE=2 SV=1;Peroxiredoxin-2 OS=Bos mutus GN=M91_12616 PE=4 SV=1	24.1	8	0.003	4	0.17	0.03	0.33	0.03	0.515152	0.17	0.02	0.32	0.02	EGGLGPLNIPLLADVTR+EGGLGPLNIPLLADVTRK+GLFVIDGKGVLR+QVTINDLPVGR+QVTINDLPVGRSVDEALR
679	sp|Q9MZL3|CACB3_BOVIN tr|L8IHA5|L8IHA5_9CETA	1	Voltage-dependent L-type calcium channel subunit beta-3 OS=Bos taurus GN=CACNB3 PE=2 SV=2;Voltage-dependent L-type calcium channel subunit beta-3 OS=Bos mutus GN=M91_03093 PE=4 SV=1	18.6	8	0.003	2	0.2	0.03	0.23	0.07	0.869565	0.21	0.03	0.35	0.01	AKHKPVAFAVR+DFLHIKEK+DSLMPSDEASESSR+DSLMPSDEASESSRQAWTGSSQR+EKYSNDWWIGR+QHTSGLPSANGHDPQDR+SGNPSSLSDIGSR+TIIERSSAR
680	sp|Q9N285|MTCH2_BOVIN tr|A6QR21|A6QR21_BOVIN tr|L8HP15|L8HP15_9CETA	1	Mitochondrial carrier homolog 2 OS=Bos taurus GN=MTCH2 PE=2 SV=2;Mitochondrial carrier homolog 2 OS=Bos taurus GN=MTCH2 PE=2 SV=1;Mitochondrial carrier-like protein 2 (Fragment) OS=Bos mutus GN=M91_15479 PE=3 SV=1	18.5	6	0.002	2	0.13	0.02	0.26	0.13	0.5	0.19	0.03	0.38	0.08	KVPFGKTYCCDLR+QVCQLPGLFCYAQHIASIDGK+RGLFTGLTPR+SMVQFIGR
682	sp|Q9TT93|ATS4_BOVIN tr|G8JKX1|G8JKX1_BOVIN tr|L8HRK8|L8HRK8_9CETA	1	A disintegrin and metalloproteinase with thrombospondin motifs 4 OS=Bos taurus GN=ADAMTS4 PE=1 SV=3;A disintegrin and metalloproteinase with thrombospondin motifs 4 OS=Bos taurus GN=ADAMTS4 PE=4 SV=1;A disintegrin and metalloproteinase with thrombospondin motifs 4 (Fragment) OS=Bos mutus GN=M91_20762 PE=4 SV=1	16	9	0.003	4	0.09	0.03	0.32	0.03	0.28125	0.19	0.01	0.38	0.05	DPGVQVEGLTVQYLGR+DQCKLTCQTR+HSPWADGTPCGPAQACMGGR+LNGSVLPGLGAPARLLYRLPAFGETLLLELEK+MSHMDSHPGRGLADGWLWGIQPR+NFPGPMDWVPR+NGGKYCEGRR+RYLLTVMAAAAK
683	sp|Q9TTA5|SMAL1_BOVIN	1	SWI/SNF-related matrix-associated actin-dependent regulator of chromatin subfamily A-like protein 1 OS=Bos taurus GN=SMARCAL1 PE=2 SV=2	22.3	19	0.007	12	0.17	0.01	0.28	0.03	0.607143	0.15	0.03	0.34	0.03	AAMPLLKVAKR+AGTPLHRVVGSQQGRCIR+AGVNFAIAQRGR+DKTKQQQK+DPSKSGSHGIFFK+ETSASSFSCPRALR+IDGSTSSADR+IPSIIEYILDLLESGR+KEWPLLVVVPSSVR+LDESTLTGSPVK+LDESTLTGSPVKKK+LLLEEAVMLR+LMERVRGLPQVQLDPLPK+LQQKAGTPLHRVVGSQQGR+TEGRLQQKAGTPLHR+TIQAICIAAYYRK+TKQQQKEALILFFNR+VQHIRIDGSTSSADR+WSFLLEEYSKLMERVR+WWWSPQAR
684	sp|Q9TTK8|KCRU_BOVIN	1	Creatine kinase U-type, mitochondrial OS=Bos taurus GN=CKMT1 PE=2 SV=1	42.3	16	0.004	3	0.19	0.04	0.25	0.05	0.76	0.2	0.08	0.32	0.02	AGVHIKLPLLSKDSR+EVERVVVDALSGLK+EVERVVVDALSGLKGDLAGR+GGNMKKVFER+GLSLPPACTR+HTTDLDASKIR+IPPPLPNK+IRSGYFDER+LERGQDIR+LLALAGAGSLAAGFLLR+LLSARPGLR+LLSARPGLRLLALAGAGSLAAGFLLR+RGTGGVDTAATGSVFDISNLDR+RLYPPSAEYPDLR+RRLYPPSAEYPDLR+TTPTGWTLDQCIQTGVDNPGHPFIK
685	sp|Q9XSJ0|UCHL5_BOVIN tr|L8IGA2|L8IGA2_9CETA	1	Ubiquitin carboxyl-terminal hydrolase isozyme L5 OS=Bos taurus GN=UCHL5 PE=2 SV=1;Ubiquitin carboxyl-terminal hydrolase (Fragment) OS=Bos mutus GN=M91_18562 PE=3 SV=1	26.8	7	0.003	3	0.17	0.03	0.24	0.03	0.708333	0.25	0.1	0.28	0.09	EFSQSFDAAMK+HNYLPFIMELLK+MTGNAGEWCLMESDPGVFTELIK+NQMLIEEEVQKLK+QQMFEFDAKTAAK+TAAKEEDAFHFVSYVPVNGR
686	sp|Q9XSJ4|ENOA_BOVIN tr|F1MB08|F1MB08_BOVIN tr|L8ISV3|L8ISV3_9CETA	1	Alpha-enolase OS=Bos taurus GN=ENO1 PE=1 SV=4;Alpha-enolase OS=Bos taurus GN=ENO1 PE=1 SV=1;Alpha-enolase OS=Bos mutus GN=M91_12821 PE=3 SV=1	31.2	21	0.005	5	0.17	0.02	0.32	0.02	0.53125	0.21	0.02	0.29	0.03	AGAVEKGVPLYR+DATNVGDEGGFAPNILENK+EALELLKNAIGK+EAMRIGAEVYHNLK+GVSKAVEHINK+IEEELGSK+LAMQEFMILPVGAENFR+LAMQEFMILPVGAENFREAMR+LAQSNGWGVMVSHR+LMIEMDGTENK+VVIGMDVAASEFYRSGK
687	sp|Q9XTA3|MYOC_BOVIN tr|L8I624|L8I624_9CETA tr|Q3SX06|Q3SX06_BOVIN	1	Myocilin OS=Bos taurus GN=MYOC PE=2 SV=1;Myocilin (Fragment) OS=Bos mutus GN=M91_03747 PE=4 SV=1;Myocilin OS=Bos taurus GN=MYOC PE=2 SV=1	12	12	0.003	3	0.18	0.03	0.33	0.02	0.545455	0.24	0.07	0.19	0.08	DSSEQRATLESTKAR+GSLYFQAAESR+GSLYFQAAESRTVLR+LESSSQEVASLR+LNPETLELEQTWETNIR
720	tr|A0A0A8JC39|A0A0A8JC39_BOVIN tr|L8IUT2|L8IUT2_9CETA	1	B-cell CLL/lymphoma 11A OS=Bos taurus GN=BCL11A PE=2 SV=1;B-cell lymphoma/leukemia 11A OS=Bos mutus GN=M91_00413 PE=4 SV=1	20.7	14	0.004	3	0.16	0.04	0.27	0.06	0.592593	0.18	0.05	0.35	0.03	DTCDEDSVAGESDRIDDGTVNGR+FSTPPGELDGGISGR+GCSPGESASGGLSKK+IDDGTVNGR+IPGSVSREASGLAEGR+LLLGSPSSLSPFSKR+LNPMAMEPPAMDFSRR+LNPMAMEPPAMDFSRRLR+QLKDPFLSFGDSRQSPFASSSEHSSENGSLR+TFKFQSNLVVHR+THGQVGKDVYK+THGQVGKDVYKCEICK+THMHKSSPMTVK
751	tr|A0A0H3U5V9|A0A0H3U5V9_BOSMU tr|Q3SZN4|Q3SZN4_BOVIN	1	Cold inducible RNA-binding protein OS=Bos mutus grunniens PE=2 SV=1;Cold inducible RNA binding protein OS=Bos taurus GN=CIRBP PE=2 SV=1	46.5	23	0.006	9	0.14	0.02	0.34	0.02	0.411765	0.17	0.02	0.33	0.02	AGYSADPVR+DAMMAMNGKSVDGR+DSYDSYGK+DSYDSYGKWRSK+FESRSGGYGGSRDYYSSR+GGSAGGRGFFRGGR+SQGGGYDR+SSGGSYRDSYDSYGKWR+YGQISEVVVVKDRETQR
770	tr|A0A2V2|A0A2V2_BOVIN tr|A6QM11|A6QM11_BOVIN	1	Thyrotropin releasing hormone (Fragment) OS=Bos taurus PE=4 SV=1;TRH protein OS=Bos taurus GN=TRH PE=2 SV=1	22.4	5	0.001	3	0.16	0.05	0.2	0.04	0.8	0.25	0.03	0.33	0.09	ASWLGYAVTKR+LVDPRAQR+QHPGKRALGSLCGPR+SWEEAGEDEDEGGELMSEKR
771	tr|A0JN55|A0JN55_BOVIN tr|L8IKA4|L8IKA4_9CETA	1	6-phosphofructo-2-kinase/fructose-2, 6-biphosphatase 3 OS=Bos taurus GN=PFKFB3 PE=2 SV=1;6-phosphofructo-2-kinase/fructose-2, 6-biphosphatase 3 (Fragment) OS=Bos mutus GN=M91_18187 PE=4 SV=1	21.8	22	0.004	5	0.22	0.02	0.27	0.03	0.814815	0.25	0.02	0.25	0.03	DLSLIKVIDVGR+DLSLIKVIDVGRR+DTYPEEYALR+GPNPLMRRNSVTPLASPEPTK+IGGDSGLSSR+IGGDSGLSSRGR+IGGDSGLSSRGRK+KQCALAALRDVK+LEPVIMELER+LTNSPTVIVMVGLPARGK+NSVTPLASPEPTK+RNSVTPLASPEPTKKPR+SAEEMPYLK
772	tr|A0JN59|A0JN59_BOVIN tr|L8HPI8|L8HPI8_9CETA	1	Inversin OS=Bos taurus GN=INVS PE=2 SV=1;Inversin OS=Bos mutus GN=M91_06512 PE=4 SV=1	25.7	40	0.01	9	0.18	0.02	0.3	0.02	0.6	0.18	0.02	0.3	0.02	AAAIIQRAWRSYQLR+DDSDLEGR+DKEDQFGR+DKEDQFGRTPLMYCVLADR+DLEEMTPLHLTTRHK+DPSAVHTVR+DVIQTLIKGGAR+ELELKPPKTMAVSKTTK+EQQLSSDLQRTEPR+FMAPGEVDTQDKNK+GSSGTKPTR+HLSHLLHVKQLGARDMDR+INPNVQDYAGR+LAGGTSSDLPPSTEVLR+LDCADTLLKAGADVNK+LLLENNAQVDATDVMK+LRLPKEEDCAR+NLLMKHEQLR+SQELRGGR+TALHLAAQKGNYRFMK+TPLMYCVLADR+TQAEPHR+TSFMWAAGK+VFLKHPSVKDDSDLEGR
773	tr|A0JN63|A0JN63_BOVIN tr|L8J1E5|L8J1E5_9CETA	1	Cleavage stimulation factor, 3' pre-RNA, subunit 1, 50kDa OS=Bos taurus GN=CSTF1 PE=2 SV=1;Cleavage stimulation factor subunit 1 OS=Bos mutus GN=M91_17508 PE=4 SV=1	13.9	9	0.003	5	0.23	0.09	0.3	0.03	0.766667	0.16	0.02	0.25	0.04	DGQLIATGSADASIK+LFDYSKPSAKRAFK+LGMENDDSAVQYAIGR+NSKYILSSGK+NSKYILSSGKDSVAK
774	tr|A0JN73|A0JN73_BOVIN tr|F1MGY1|F1MGY1_BOVIN tr|L8J1J2|L8J1J2_9CETA	1	DNA topoisomerase OS=Bos taurus GN=TOP3A PE=2 SV=1;DNA topoisomerase OS=Bos taurus GN=TOP3A PE=3 SV=1;DNA topoisomerase OS=Bos mutus GN=M91_01740 PE=3 SV=1	16.5	31	0.006	10	0.15	0.01	0.36	0.02	0.416667	0.17	0.01	0.3	0.02	AAMEVALRGVR+AIQAFVPEVFHKIR+CPQCSRDMVLKTR+DMVLKTR+EGENIGFEVIHVCKAVKPSLQVLR+FKAIQAFVPEVFHK+FVAHGLMILAR+GTQGLEARSKRPR+HGIGTDATHAEHIETIKAR+ILCVAEKNDAAKGIADLLSGGR+NDAAKGIADLLSGGR+NDAAKGIADLLSGGRMR+QVFIEAVAKAR+QVFIEAVAKARK+RHRLFNHTACLVLYQMCMEDPR
775	tr|A0JN78|A0JN78_BOVIN tr|L8I7A0|L8I7A0_9CETA	1	HEAT repeat containing 3 OS=Bos taurus GN=HEATR3 PE=2 SV=1;HEAT repeat-containing protein 3 OS=Bos mutus GN=M91_19415 PE=4 SV=1	17.7	28	0.008	12	0.2	0.01	0.29	0.01	0.689655	0.21	0.01	0.29	0	DIMTPLVALLK+ECACAGLAR+ECSTGLDSNEMSPQK+IFDKTAFPNSVAVDVCSR+LGPLLLDPSLAVR+LGPLLLDPSLAVRETATGALR+LVQQRPVLPSLAR+NIPQCMTPDQLMTLCTAGVR+RFVAYQETVEKR+RLGPLLLDPSLAVR
776	tr|A0JNE9|A0JNE9_BOVIN tr|L8HZK1|L8HZK1_9CETA	1	CTP synthase OS=Bos taurus GN=CTPS PE=2 SV=1;CTP synthase OS=Bos mutus GN=M91_07864 PE=3 SV=1	18.8	8	0.003	3	0.23	0.02	0.24	0.06	0.958333	0.25	0.08	0.23	0.04	DNNITTGK+FSDSYASVIK+GLGLSPDLVVCR+LCSAHGVLVPGGFGVR+MLMKWKEMADR+QFQFKVK+QFQFKVKR+QKKPFLGVCLGMQLAVVEFSR+RTLFQTKNSVMR+SGSSSPDSEITELK+SGSSSPDSEITELKFPSINHD+TLFQTKNSVMR
777	tr|A0JNK9|A0JNK9_BOVIN tr|L8IUL7|L8IUL7_9CETA	1	Six transmembrane epithelial antigen of the prostate 2 OS=Bos taurus GN=STEAP2 PE=2 SV=1;Metalloreductase STEAP2 OS=Bos mutus GN=M91_18712 PE=4 SV=1	15.9	4	0.002	0	-9	-9	-9	-9	1	-9	-9	-9	-9	EIENLPLR+GFNVISAWALQLGPKDASR+QLGLLSFFFASVHVAYSLCLPMR+SLSETFLPNGINGIK+SLSETFLPNGINGIKDAR+TNIIFVAIHR
778	tr|A0JNP9|A0JNP9_BOVIN tr|F1MW63|F1MW63_BOVIN	1	PMS1 postmeiotic segregation increased 1 (S. cerevisiae) OS=Bos taurus GN=PMS1 PE=2 SV=1;Uncharacterized protein OS=Bos taurus GN=PMS1 PE=4 SV=1	21.9	9	0.004	6	0.2	0.05	0.23	0.03	0.869565	0.2	0.03	0.32	0.03	DLERYNKQIK+EDMQDIIYR+EVYECRPR+IVQIPFSMENLKKNFDTQK+LFKNLPVR+LPAEPLEKPIILTESLFNGSHYLEILHK+LSRQLPMYLSKEDMQDIIYR+MKPTSVWNLAQK+MKPTSVWNLAQKHKLK+MKQLSAATVR+NGETWSVDSVGQAQSENGNK+QIKRAIEQESQVSLK+RAIEQESQVSLKDGK+SGQLTAYDLISNR+TEIMLLNSYRVEEALLFK+TSPSNQPKLDELFQAQIEK
779	tr|A0JNQ0|A0JNQ0_BOVIN tr|G3N1Z0|G3N1Z0_BOVIN tr|L8I711|L8I711_9CETA	1	Allograft inflammatory factor 1-like OS=Bos taurus GN=AIF1L PE=2 SV=1;Uncharacterized protein (Fragment) OS=Bos taurus GN=AIF1L PE=4 SV=1;Allograft inflammatory factor 1-like protein (Fragment) OS=Bos mutus GN=M91_15847 PE=4 SV=1	79	18	0.005	6	0.15	0.02	0.32	0.03	0.46875	0.19	0.02	0.32	0.01	ANEGSSKPVGPPPER+ANEGSSKPVGPPPERDIASLP+DFVNMMLGKR+DFVNMMLGKRSAVLK+EFLCDQKYSDEENLPEKLTAFK+EKYMEFDLNNEGEIDLMSLKR+LGVPKTHLEMK+MMEKLGVPK+MMEKLGVPKTHLEMK
781	tr|A1A4I7|A1A4I7_BOVIN tr|L8IA29|L8IA29_9CETA	1	Bestrophin 1 OS=Bos taurus GN=BEST1 PE=2 SV=1;Bestrophin-1 OS=Bos mutus GN=M91_15487 PE=4 SV=1	25.8	23	0.005	8	0.17	0.01	0.32	0.02	0.53125	0.2	0.02	0.28	0.03	DEQGRMLR+DEQGRMLRR+FLGLQSLDRQSPR+IRDPILLQSLLNEMNTLR+ISGIDDPVK+ISGIDDPVKDQSLQPATPR+KTVEFNLMDMSEAPEHLR+LMNLVSSFVEGKDEQGRMLR+LTLYCDSYIQLIPISFVLGFYVTLVVTR+MTVTYSSQVANARLGSFSR+RISGIDDPVK+TLMRYANLGNVLILR
782	tr|A1A4I8|A1A4I8_BOVIN tr|L8IJG6|L8IJG6_9CETA	1	Uncharacterized protein OS=Bos taurus GN=XPO7 PE=2 SV=1;Exportin-7 (Fragment) OS=Bos mutus GN=M91_04191 PE=4 SV=1	17.8	37	0.009	16	0.16	0.01	0.31	0.02	0.516129	0.19	0.02	0.31	0.01	CRTTFYTALGR+DQVYALKLK+ETSKMITMYGNR+IITNLKYWGR+ITKLGWFDCQK+IYIGDQVQK+LATFVTQALIQLYAR+LESVHIILR+LKSNYQLGELVK+LTWLVYIIGAVIGGR+NLLTKNR+QLYETTDTTTRLQAEK+QQAMHLCFENLMEGIER+RLSEVLGLNDETMVLSVFIGK+RLSEVLGLNDETMVLSVFIGKIITNLK+TTFYTALGR+VLQLMNLTDSRLAQAGNEK
783	tr|A1A4P2|A1A4P2_BOVIN tr|L8HQE5|L8HQE5_9CETA	1	Interferon induced transmembrane protein 5 OS=Bos taurus GN=IFITM5 PE=2 SV=1;Interferon-induced transmembrane protein 5 OS=Bos mutus GN=M91_08499 PE=4 SV=1	12.7	5	0.002	4	0.2	0.04	0.35	0.02	0.571429	0.18	0.02	0.25	0.03	DQKVAGDLEAAR+DQKVAGDLEAARR+VAGDLEAARRLGSK
784	tr|A1A4R7|A1A4R7_BOVIN tr|F2Z4H8|F2Z4H8_BOVIN tr|L8I5B7|L8I5B7_9CETA	1	TIAL1 protein (Fragment) OS=Bos taurus GN=TIAL1 PE=2 SV=1;Uncharacterized protein OS=Bos taurus GN=TIAL1 PE=4 SV=2;Nucleolysin TIAR (Fragment) OS=Bos mutus GN=M91_10470 PE=4 SV=1	39.1	14	0.003	4	0.17	0.01	0.28	0.02	0.607143	0.19	0.03	0.34	0.06	CYWGKESPDMTK+DAAAALAAMNGR+ISDARVVKDMATGK+KPPAPKSTQENNTKQLR+LDAENAIVHMGGQWLGGR+LDAENAIVHMGGQWLGGRQIR+QTFSPFGQIMEIR+SAFAPFGKISDAR+VNWATTPSSQKK
794	tr|A1L505|A1L505_BOVIN tr|A6QLT5|A6QLT5_BOVIN tr|L8HL19|L8HL19_9CETA	1	Ubiquitin associated protein 2-like OS=Bos taurus GN=UBAP2L PE=2 SV=1;UBAP2L protein OS=Bos taurus GN=UBAP2L PE=2 SV=1;Ubiquitin-associated protein 2-like protein OS=Bos mutus GN=M91_20119 PE=4 SV=1	8.4	8	0.003	5	0.19	0.04	0.28	0.02	0.678571	0.2	0.03	0.29	0.05	DGSLASNPYSGDLTK+GGPPRRGR+GGSGRRGGR+KGVSGQKDGGQTESNEEGK+MMTSVGTNR+SGGPSGRGTERGR+VKQLIDITGK
795	tr|A1L542|A1L542_BOVIN tr|F6PRJ0|F6PRJ0_BOVIN	1	Leucine rich repeat containing 8 family, member E (Fragment) OS=Bos taurus GN=LRRC8E PE=2 SV=1;Uncharacterized protein OS=Bos taurus GN=LRRC8E PE=4 SV=1	30.8	23	0.006	6	0.15	0.03	0.32	0.02	0.46875	0.21	0.02	0.3	0.02	ALSRLELKGNR+DRLKVIR+EETGMGDIPDVK+EVPLWVFGLR+IPHAVFSLGALQELDLR+IPHAVFSLGALQELDLRDNHLRSIEEILSFQHCR+ISFLVACR+LEALPEELGNCGGLK+LETLPTQLGMCSSLR+LPFSSQIFLR+LRTLLLGYNHLSQLAPQVGALR+QLNLNHEWTAEKLR+RFAVFLSEVSESR+SVREETGMGDIPDVK+VPASVTDVAGHLQR
796	tr|A1L545|A1L545_BOVIN tr|F1MAW0|F1MAW0_BOVIN tr|L8J2M3|L8J2M3_9CETA	1	Gemin4 (Fragment) OS=Bos taurus GN=GEMIN4 PE=2 SV=1;Uncharacterized protein (Fragment) OS=Bos taurus GN=GEMIN4 PE=4 SV=2;Component of gems 4 (Fragment) OS=Bos mutus GN=M91_14672 PE=4 SV=1	15.4	17	0.007	9	0.2	0.01	0.28	0.02	0.714286	0.2	0.02	0.31	0.02	DISLTSLAR+EAERDISLTSLAR+EERQVVSELAECVGDFLR+EFVLPFLMLEVK+ETVWTKLSTPR+GFLVALVQVMPWCSPQEWQCLHQLTR+GGEQDITASIAMAIIEQK+KALIIIWAK+LCSMAVVNLGTHK+LEQLDWTVGLR+LEQLDWTVGLRLK+LKSFFEGHFK+LYLDTTSLAKEER+QVVSELAECVGDFLR+TNPSVSSLLQK
797	tr|A1L552|A1L552_BOVIN tr|L8I364|L8I364_9CETA	1	Integrator complex subunit 5 OS=Bos taurus GN=KIAA1698 PE=2 SV=1;Integrator complex subunit 5 OS=Bos mutus GN=M91_07631 PE=4 SV=1	12.9	14	0.003	3	0.23	0.04	0.24	0.03	0.958333	0.2	0.03	0.32	0.03	ANPKAWAPVISAWSIDLMGQLSSTYSGQHQR+EGGGEGGPHLAVLHSVLHR+FFASLRLHGPPGVASASQLLLR+IASVVGILGHLASRHGDSIR+LGLFSGRFQAPLPSTLR+MFHDSLAGGTGGR+NIDRLGLFSGRFQAPLPSTLR+RELLRMFHDSLAGGTGGR
798	tr|A1L580|A1L580_BOVIN	1	Semaphorin 6B OS=Bos taurus GN=SEMA6B PE=2 SV=1	23.4	11	0.003	3	0.21	0.02	0.31	0.05	0.677419	0.15	0.04	0.31	0.02	DNISGMAR+EIAMEFNYLEK+EIAMEFNYLEKVVVSR+NDVGGSPR+QEGECRNFVKVLLLR+TPRSLRPEHSHSALGGLGKTR+TVMMARPR+TVMMARPRCR+TVMMARPRCRK+VCKNDVGGSPR+VCKNDVGGSPRVLEK
799	tr|A1L5A4|A1L5A4_BOVIN tr|F1ME34|F1ME34_BOVIN tr|L8HRK3|L8HRK3_9CETA tr|Q3ZCB7|Q3ZCB7_BOVIN	1	Death effector domain-containing protein OS=Bos taurus GN=DEDD PE=2 SV=1;Uncharacterized protein OS=Bos taurus GN=DEDD PE=4 SV=1;Death effector domain-containing protein OS=Bos mutus GN=M91_20757 PE=4 SV=1;Death effector domain containing OS=Bos taurus GN=DEDD PE=2 SV=1	26	25	0.006	7	0.18	0.01	0.29	0.02	0.62069	0.22	0.02	0.29	0.02	CDESNFRQVLQLLRIITR+DFLLALER+NGRDFLLALERQGR+NLMLQALP+TVPPHYPVVCCPASGPQMCSK+VRAEYCQHETALQGNVFSNK
800	tr|A1L5C0|A1L5C0_BOVIN tr|A6QPH6|A6QPH6_BOVIN tr|L8IGJ7|L8IGJ7_9CETA	1	Adhesion molecule, interacts with CXADR antigen 1 OS=Bos taurus GN=AMICA1 PE=2 SV=1;AMICA1 protein OS=Bos taurus GN=AMICA1 PE=2 SV=1;Junctional adhesion molecule-like protein (Fragment) OS=Bos mutus GN=M91_09742 PE=4 SV=1	25.8	9	0.002	3	0.16	0.02	0.33	0.01	0.484848	0.19	0.02	0.32	0.01	CVFHSTEEKHMSR+FQMESLVFKK+LRTPMGYSQNWGR+LRTPMGYSQNWGRFLNR+LVGDILHHDGSLLLQNVEETDQGNFTCEIR+NDVSIMLHGVK+TPMGYSQNWGR+VDWMFSSGK+VNLVGDTSR
801	tr|A1XG22|A1XG22_BOVIN tr|L8IMF1|L8IMF1_9CETA	1	NF-kappaB transcription factor p65 subunit OS=Bos taurus GN=RELA PE=2 SV=1;Transcription factor p65 (Fragment) OS=Bos mutus GN=M91_15930 PE=4 SV=1	21.4	7	0.002	2	0.14	0.09	0.31	0.05	0.451613	0.27	0.08	0.24	0.05	CEGRSAGSIPGER+DLEQAISQR+EDIEVYFTGPGWEAR+GGDEIFLLCDK+GSFSQADVHR+INGYTGPGTVR+INGYTGPGTVRISLVTK+KSPFNGPTDPRPPTRR+LAPVLSHPIFDNR+SPFNGPTDPRPPTRR+TPPYADPGLQAPVR
803	tr|A2VDK7|A2VDK7_BOVIN tr|L8I057|L8I057_9CETA	1	F-box protein 34 OS=Bos taurus GN=FBXO34 PE=2 SV=1;F-box only protein 34 OS=Bos mutus GN=M91_04099 PE=4 SV=1	25.2	14	0.004	7	0.22	0.03	0.28	0.04	0.785714	0.2	0.03	0.24	0.04	CSPQGDQAWDGAPR+EKIAFFAAHQCSNR+EKIAFFAAHQCSNRIGSMK+EPGSLSRNNSFRR+IGSMKIKSSWDIDGR+IKSSWDIDGRATK+IQQLLEPQQYMAFLPHHIMVK+KPFGILSPNVLCSMSGK+LQKKGQPLEIGTGTLR+NNSFRRNVGR+NPEVGETQSEPVRVLDMVAR+QSQREPGSLSR+QVSHDFLETR+SSWDIDGRATKR+TPMSHQQAISDEECK+TVGSVSVGCSPLR
804	tr|A2VDL0|A2VDL0_BOVIN	1	Adenosine deaminase, tRNA-specific 1 OS=Bos taurus GN=ADAT1 PE=2 SV=1	15.1	6	0.002	2	0.18	0.02	0.28	0.02	0.642857	0.17	0.01	0.37	0.04	LCYEHYGSK+LCYEHYGSKLPK+LGRIQAR+LQARYRVLGR+MRKSGDILNDSHAEVIAR+QSFGSQER+SGDILNDSHAEVIAR+VQVTKEVVSMGTGTKCIGQSK
805	tr|A2VDQ0|A2VDQ0_BOVIN	1	Intraflagellar transport 81 homolog (Chlamydomonas) OS=Bos taurus GN=IFT81 PE=2 SV=1	30.3	15	0.004	4	0.1	0.03	0.43	0.03	0.232558	0.11	0.01	0.32	0.06	EEMPEQTAKRMLSLLGILK+EKLANLEREVSVK+ESHGPNMK+INEINTQINQLIEKK+LEEEIKFNSYMVTEKFPK+LNSLVSEKKSALAPIIK+LSLYRQQASIISR+NEPIEGKLSLYRQQASIISR+NIAEQENLGK+NLEVQLR+QAKMWHDFEQLMECKK+QEQKNQLFHAVQR+RVETVQNHQR+RVETVQNHQRMLK+SEVDEMKGRTLDDMSEMVK+SMRHAAADATPESLMKR+TLDDMSEMVK
806	tr|A2VDQ3|A2VDQ3_BOVIN	1	Uncharacterized protein OS=Bos taurus GN=ZNF295 PE=2 SV=1	14.3	12	0.004	4	0.16	0.02	0.31	0.04	0.516129	0.18	0.04	0.32	0.03	DGGETVAPDTR+DGPAVLARPPELAGPLEEPSR+DLALQTEDDR+ESDTLFYHAPPLSAITFKR+GSPETPFLLK+GSPETPFLLKEAGR+LTCLECMR+RAVAPPSKPPPDR+RSVIVCQSRNEAPGK+TPAPQPHRLR
807	tr|A2VDR7|A2VDR7_BOVIN tr|L8IF60|L8IF60_9CETA	1	Arrestin domain containing 2 OS=Bos taurus GN=ARRDC2 PE=2 SV=1;Arrestin domain-containing protein 2 OS=Bos mutus GN=M91_16408 PE=4 SV=1	26.3	6	0.002	2	0.17	0	0.35	0.01	0.485714	0.19	0.01	0.3	0	IPPVGPSILHCR+KVFTVIEPVDINTPALLAPQAGAREK+QKRAVVASLSGEPVGPGR+RAVVASLSGEPVGPGR+SAGSSTAYTQSYSER+SWYSNRGLVSLSAKIDR+VCVDIPGSSK+VSSLKLRAR
808	tr|A2VDS7|A2VDS7_BOVIN tr|F1MYK4|F1MYK4_BOVIN tr|L8HST8|L8HST8_9CETA	1	DPYSL4 protein OS=Bos taurus GN=DPYSL4 PE=2 SV=1;Uncharacterized protein OS=Bos taurus GN=DPYSL4 PE=4 SV=2;Dihydropyrimidinase-related protein 4 (Fragment) OS=Bos mutus GN=M91_10735 PE=4 SV=1	19.5	13	0.003	5	0.18	0.02	0.25	0.02	0.72	0.21	0.04	0.33	0.02	DKGVNSFLVFMAYK+DLGAVAQVHAENGDIVDEEQK+DNFTLIPEGTNGVEER+IMAPPGGRSHITSLS+NRLAEIHGVPR+RTAQKIMAPPGGR+TAQKIMAPPGGR+TAQKIMAPPGGRSHITSLS+VMSKAAADVIAR+VVLEDGALCVTPGTGR
809	tr|A2VDV1|A2VDV1_BOVIN tr|L8IFH1|L8IFH1_9CETA	1	Ankyrin repeat domain 22 OS=Bos taurus GN=ANKRD22 PE=2 SV=1;Ankyrin repeat domain-containing protein 22 (Fragment) OS=Bos mutus GN=M91_17496 PE=4 SV=1	17.4	13	0.005	9	0.24	0.02	0.27	0.03	0.888889	0.2	0.01	0.27	0.02	DGETSLDIAQR+LKFSQIELMLR+NKDGETSLDIAQR+NKDGETSLDIAQRLK+TKQNEALVR
810	tr|A2VE89|A2VE89_BOVIN tr|F1N4C0|F1N4C0_BOVIN tr|L8HTU1|L8HTU1_9CETA	1	Protein Wnt OS=Bos taurus GN=WNT11 PE=2 SV=1;Protein Wnt OS=Bos taurus GN=WNT11 PE=3 SV=1;Protein Wnt OS=Bos mutus GN=M91_09005 PE=3 SV=1	41	13	0.003	4	0.12	0.04	0.32	0.04	0.375	0.22	0.05	0.28	0.07	CDLMCCGRGYNPYTDRVVER+CHGVSGSCSIRTCWK+DVAADLKTR+FSDAPMKVK+LHNSEVGR+LHNSEVGRQALRASLEMK+LMRLHNSEVGR+NEKVGSHGTQDR+SNLELMHTIVHAAR+TGSQANKLMR+TGSQANKLMRLHNSEVGR+TRYLSATKVVHRPMGTR+VVHRPMGTRK+VVHRPMGTRKHLVPK+WGGCADNLSYGLLMGAKFSDAPMK
811	tr|A3KMV0|A3KMV0_BOVIN tr|F1MZS3|F1MZS3_BOVIN	1	SMYD1 protein OS=Bos taurus GN=SMYD1 PE=2 SV=1;Uncharacterized protein OS=Bos taurus GN=SMYD1 PE=4 SV=1	22	12	0.003	5	0.14	0.03	0.34	0.01	0.411765	0.22	0.04	0.27	0.02	DLEAMRMQTEMELR+DNPKPSQEVVK+EFCAADIIFAER+EMIQFSKDTLEK+IDKARSEGLYHEVVK+MTIGGMENVEVFTAEGK+QNEFMYHKMREAALNNQPMQVMAEPSK
812	tr|A3KMV3|A3KMV3_BOVIN tr|L8IHN8|L8IHN8_9CETA	1	E3 ligase WWP2 OS=Bos taurus GN=WWP2 PE=2 SV=1;NEDD4-like E3 ubiquitin-protein ligase WWP2 (Fragment) OS=Bos mutus GN=M91_18217 PE=4 SV=1	22.4	11	0.003	2	0.19	0.01	0.26	0.02	0.730769	0.23	0.02	0.31	0.01	EEYIMLLTDWR+HQPPSTNCFGGRSRTHR+HYTKNSKQIQWFWQVVK+INSFVEVAVDGLPSETK+INSFVEVAVDGLPSETKK+INSFVEVAVDGLPSETKKTGK+LLQFVTGTCR+MENTQLTLNLQTENK+NYEQWQSQRNQLQGAMQHFSQR+THRHSSGSARPATAAGEQSPGTSSR+TQGMIQEPALPPGWEMK+TTQWEDPR+TTTWERPLPPGWEKR+VGKETWLPRSHTCFNR
813	tr|A3KMV6|A3KMV6_BOVIN tr|L8I005|L8I005_9CETA	1	HNRNPR protein OS=Bos taurus GN=HNRNPR PE=1 SV=1;Heterogeneous nuclear ribonucleoprotein R OS=Bos mutus GN=M91_02245 PE=4 SV=1	25.8	19	0.005	4	0.19	0.04	0.28	0.02	0.678571	0.18	0.02	0.32	0.04	AIDALREFNEEGALSVLQQFK+EIEGEEIEIVLAKPPDKKR+GAPLGPPRGSRGGR+GAPPPPRGR+GGPAQQQRGRGSR+GGRGGPAQQQR+GGRGGPAQQQRGR+GGYEDPYYGYDDGYAVRGR+HIGVCISVANNR+KYGGPPPDSVYSGVQPGIGTEVFVGKIPR+LMMDPLSGQNR+QGSKVQESTKGPDEAK+TGYTLDVTTGQR
814	tr|A3KMW9|A3KMW9_BOVIN tr|L8HQ54|L8HQ54_9CETA	1	Uncharacterized protein OS=Bos taurus GN=ZNF644 PE=2 SV=1;Zinc finger protein 644 (Fragment) OS=Bos mutus GN=M91_06981 PE=4 SV=1	25.4	20	0.005	2	0.14	0.02	0.38	0.05	0.368421	0.2	0.01	0.27	0.04	EKSNAKANSNYLYR+ELQDEGR+HMEYLHSSSCIDSFGSPLGLDKRK+IGLSNHVR+ILKALNSR+INTDVTGAKEELLDDNSFISDK+ITRYTEDCFSDSNCVPNK+KLLTLPHGADEVYILR+KSIAQSGVNVCSQNSSPHK+LLTLPHGADEVYILRCR+MCPFTTSVK+MDFTMHSALDCKQKK+MIKKSGESYPLHFK+NDCVSTLTGISSGTDEFR+NNTFTLPEELSK+NQSLTLIELLKNKR+NSALKQDVKR+NSLLKHMIIHQERR+QKLMEEIR+RTGTGTPIK+SDIIEEPIDTDSPKPLTK+SGESYPLHFKK+SPICVLNEMMQNEEK+SRSRSGSK+TGAGMVEVTSLLK+TGTGTPIKRVR+THKKAFMK+YFHQTAK
815	tr|A3KMX4|A3KMX4_BOVIN tr|F6Q4T4|F6Q4T4_BOVIN tr|L8IRV0|L8IRV0_9CETA	1	REPS1 protein (Fragment) OS=Bos taurus GN=REPS1 PE=2 SV=1;Uncharacterized protein OS=Bos taurus GN=REPS1 PE=4 SV=1;RalBP1-associated Eps domain-containing protein 1 OS=Bos mutus GN=M91_20304 PE=4 SV=1	25.2	16	0.005	6	0.19	0.01	0.31	0.02	0.612903	0.21	0.02	0.28	0.02	DGALTLDEFCAAFHLVVARK+DKKAIQASIR+FVASKNEQESR+GSTSHDTVQPR+GTTPLAPPPKPVRRR+IEEKTAASAPANVSK+KAIQASIR+KNGYDLPEKLPESLMPK+LNSELQQQLKDVLEER+LVAVAQSGFPLRVESINTVKDLPLPR+NGYDLPEKLPESLMPK+NKETNTVLAR+QYYVNQFK+TAASAPANVSK+TGVLAAVLASQPSIPR+TGVLAAVLASQPSIPRSVGK+TVASATTANEIR+TVASATTANEIRR
816	tr|A3KMX5|A3KMX5_BOVIN tr|L8IW73|L8IW73_9CETA	1	FZD10 protein OS=Bos taurus GN=FZD10 PE=2 SV=1;Frizzled-10 (Fragment) OS=Bos mutus GN=M91_02527 PE=4 SV=1	15.6	17	0.004	5	0.2	0.03	0.25	0.04	0.8	0.2	0.03	0.32	0.02	DGGPGRAGCDNPGK+LKCSPIMEQFNFK+LPNKNDPNYLCMEAPNNGSDEPAR+MPNLMGHENQR+TGGENTDKLEKLMVR+TLQSWQNVCSR+TLQSWQNVCSRR
817	tr|A3KMY1|A3KMY1_BOVIN tr|L8HYJ5|L8HYJ5_9CETA	1	KRT82 protein OS=Bos taurus GN=KRT82 PE=2 SV=1;Keratin, type II cuticular Hb2 OS=Bos mutus GN=M91_10635 PE=3 SV=1	7.2	2	0.001	2	0.21	0.08	0.33	0.01	0.636364	0.14	0.04	0.3	0.02	DEKEQIKCLNNR+NEILEINKLIQR+VASRCGLPGFGYR
818	tr|A3KN01|A3KN01_BOVIN tr|L8IAN7|L8IAN7_9CETA	1	Uncharacterized protein OS=Bos taurus GN=ZNF830 PE=2 SV=1;Zinc finger protein 830 OS=Bos mutus GN=M91_13625 PE=4 SV=1	27.9	9	0.003	8	0.16	0.03	0.36	0.05	0.444444	0.17	0.02	0.26	0.03	ASLVPQVQPSTSALPTNFDKAGK+EKVAELKGAK+EWDEFQKAMR+GGGGGEGKKGDACK+IESPFAKYNR+LDRQIGEIDEQIECYR+LSTNRKR+MASSASARPPAGKR+RIESPFAKYNR
819	tr|A3KN07|A3KN07_BOVIN tr|L8I3P1|L8I3P1_9CETA	1	DDX41 protein OS=Bos taurus GN=DDX41 PE=2 SV=1;Putative ATP-dependent RNA helicase DDX41 (Fragment) OS=Bos mutus GN=M91_05847 PE=4 SV=1	33.6	83	0.028	38	0.1	0.01	0.38	0.01	0.263158	0.11	0.01	0.35	0.01	DMIGIAFTGSGK+DYLAHSSMDF+EEEKILESVAEGR+EMKFPAAILR+EQMETIRHGVHMMVATPGR+GAAEEEQQDSGSEPR+ILESVAEGR+ITDCPKLEAMQTKQVSNIGR+KDVLVATDVASK+LEAMQTK+LEAMQTKQVSNIGR+LMDLLQKKMVSLDICR+RARTDEATATGSR+RQLLLQKLLQR+TDEATATGSR+TKAIEAFREGK+TLVFTLPVIMFCLEQEKR+TPPPVLIFAEK+YHILVEGDGIPPPIK
820	tr|A3KN30|A3KN30_BOVIN tr|L8IR45|L8IR45_9CETA	1	CPXM1 protein OS=Bos taurus GN=CPXM1 PE=2 SV=1;Putative carboxypeptidase X1 OS=Bos mutus GN=M91_18322 PE=4 SV=1	14.8	9	0.003	4	0.16	0.01	0.29	0.01	0.551724	0.19	0.01	0.36	0.02	ELLLLLMQFLCHEFLR+FSGIITQGR+GSELVGWAEGR+HPTRFSGIITQGR+IYSIGKSHQGLK+LRELLAAGAKVPPDLR+QVNEQCPNITRIYSIGK+TPWAARELTPTPDEAVFR+WLSTVYAGTNR
821	tr|A3KN51|A3KN51_BOVIN tr|L8I8S7|L8I8S7_9CETA	1	TSG101 protein OS=Bos taurus GN=TSG101 PE=2 SV=1;Tumor susceptibility 101 protein (Fragment) OS=Bos mutus GN=M91_16614 PE=4 SV=1	31	18	0.006	9	0.2	0.01	0.29	0.02	0.689655	0.2	0.02	0.28	0.01	DGTISEDTIR+DGTISEDTIRASLISAVSDKLR+DLKPVLDSYVFNDGSSR+EEMDRAQAELNALKR+ELMNLTGTIPVPYR+KDEELSSALEK+LDQEVAEVDKNIELLR+QFQLRALMQK+QFQLRALMQKAR+TGKHVDANGK
822	tr|A4FUB3|A4FUB3_BOVIN	1	SOX5 protein OS=Bos taurus GN=SOX5 PE=2 SV=1	24.2	27	0.009	16	0.18	0.02	0.28	0.02	0.642857	0.2	0.02	0.3	0.02	ASVPASLASPSAR+DEVAQPLNLSAKPK+DKLLAMGSGNFGEIK+EKTTLESLTQQLAVK+EQQVLDGKVAVVNSLGLNNCR+GSLADVVDTLK+GSLADVVDTLKQR+GSLADVVDTLKQRK+GSNEPHIKRPMNAFMVWAK+QLMGMINQLTSLR+QQMELAKQQQEQIAR+RKGSLADVVDTLK+RPMNAFMVWAKDER+STNSPPPKSKDEVAQPLNLSAKPK+VAVVNSLGLNNCR+VMSSFAPHNSSTSPQKAEEGGR
823	tr|A4FUC8|A4FUC8_BOVIN	1	CARS protein OS=Bos taurus GN=CARS PE=2 SV=1	16.6	58	0.009	11	0.18	0.02	0.28	0.02	0.642857	0.2	0.03	0.3	0.02	DALLRER+DNVLPELGVR+DVFVPQDGR+DVFVPQDGRR+LAFLMHSWK+LFEAQEK+LLNEFFLNVK+LRALDAYLSTR+NFITIKDALK+QLSGPPADPQLFHVAR+QMLERLQHAVAQAAEPLEGALR+RSPNDFALWK+YRETQPQAAQLLEDVR
824	tr|A4FUD0|A4FUD0_BOVIN tr|L8IEG4|L8IEG4_9CETA	1	MTHFD1 protein OS=Bos taurus GN=MTHFD1 PE=1 SV=1;C-1-tetrahydrofolate synthase, cytoplasmic (Fragment) OS=Bos mutus GN=M91_07560 PE=3 SV=1	11.9	18	0.006	4	0.17	0.03	0.32	0.02	0.53125	0.24	0.04	0.24	0.03	AAEEIGIKATHIKLPR+DDSNLYINMKLKAAEEIGIK+DVDGLNSISAGK+DVDGLNSISAGKLAR+ETGVQIAGR+ETGVQIAGRHAVVVGR+GVPTGFVLPIR+HAVVVGRSK+LDIDPETITWQR+LDIDPETITWQRVLDTNDR+LPRTATESEVLK+TATESEVLK+TPVPSDIDISR
825	tr|A4FUD5|A4FUD5_BOVIN tr|L8IYR3|L8IYR3_9CETA	1	ABI3 protein OS=Bos taurus GN=ABI3 PE=2 SV=1;ABI family member 3 (Fragment) OS=Bos mutus GN=M91_15618 PE=4 SV=1	29	9	0.002	3	0.24	0.03	0.25	0.02	0.96	0.23	0.06	0.26	0.03	DLSTQLSRTGTLSR+DLSTQLSRTGTLSRK+DNELSFSEGTVICITR+KSIKAPATPASATLGR+LSAASSASSLASAGSAEGVGGVSMTK+MLDLQAAALR+MLDLQAAALRQVEAR+VSTLGQMVNMHMEK+VSTLGQMVNMHMEKVAR
826	tr|A4FUD8|A4FUD8_BOVIN tr|F6RY07|F6RY07_BOVIN tr|L8IXQ5|L8IXQ5_9CETA tr|Q0V8D9|Q0V8D9_BOVIN	1	XPA binding protein 2 OS=Bos taurus GN=XAB2 PE=2 SV=1;Uncharacterized protein OS=Bos taurus GN=XAB2 PE=4 SV=1;Pre-mRNA-splicing factor SYF1 OS=Bos mutus GN=M91_04875 PE=4 SV=1;XPA binding protein 2 OS=Bos taurus GN=XAB2 PE=2 SV=1	18.4	12	0.004	6	0.18	0.02	0.27	0.03	0.666667	0.18	0.02	0.34	0.03	DFEVRHGNEDTIREMLR+DQPSRAQSKILFVR+EEEDDVDLELR+GGLTRFTDQLGK+HAMAVYER+KATALPARR+LATVVNDER+LLEQRAEQLAAEAER+LNQLYER+LSPESAEEYIEYLKSSDR+NQFSVKCWLR+RTFDRALR+SGHFEKAR+VQSLNVDAIIR
827	tr|A4FUE2|A4FUE2_BOVIN tr|L8HPP5|L8HPP5_9CETA	1	ABCF3 protein OS=Bos taurus GN=ABCF3 PE=2 SV=1;ATP-binding cassette sub-family F member 3 (Fragment) OS=Bos mutus GN=M91_03612 PE=3 SV=1	23.3	15	0.004	5	0.17	0.02	0.32	0.02	0.53125	0.19	0.05	0.29	0.02	ASVILAGLGFTPK+EDLLHRERELNAQIAAGR+EFSGGWRMR+ELNAQIAAGR+ESRLESSGK+ESRLESSGKNK+GGVILVSHDERFIR+KESRLESSGK+LEEIEADKAPAR+LLMGDLTPVR+LSVSADLESRICVVGENGAGKSTMLK+NGLGKTTLLK+NKSYDVRIENFDVSFGDR+RYGLVGRNGLGK+VEGGFDQYRALLQEQFRR
828	tr|A4FUE5|A4FUE5_BOVIN tr|L8IEZ5|L8IEZ5_9CETA	1	RAB3GAP1 protein OS=Bos taurus GN=RAB3GAP1 PE=2 SV=1;Rab3 GTPase-activating protein catalytic subunit (Fragment) OS=Bos mutus GN=M91_16836 PE=4 SV=1	20.6	18	0.006	9	0.15	0.01	0.34	0.02	0.441176	0.18	0.02	0.3	0.03	AHCLVRWYGLR+DYIEEEVVDEKGNMVLKGELSAR+EMASLKPEGR+EMASLKPEGRLHQHGK+GNMVLKGELSAR+IIHKLFVNAQR+KESTDEILGR+KGGPKEMASLKPEGR+KTSPSDNVTNTYSGDAGK+LEEIIHQITNVEAIIARAR+LGTSAEGAHLR+LGTSAEGAHLRAR+LSVSNMVHTAKKK+QNLAADFPPPAGR+SGDQLGPDNLR+SGDQLGPDNLRETDK+TDFEMVHLR+TDFEMVHLRK+VLHFPNPEDK+WRRMYVGECQGPGVR
829	tr|A4FUF2|A4FUF2_BOVIN tr|F1MLC2|F1MLC2_BOVIN	1	Elongation of very long chain fatty acids protein OS=Bos taurus GN=ELOVL2 PE=2 SV=1;Elongation of very long chain fatty acids protein (Fragment) OS=Bos taurus GN=ELOVL2 PE=3 SV=2	19.5	9	0.002	3	0.11	0.02	0.39	0.03	0.282051	0.16	0.03	0.32	0.01	AMEEAGKEVKNGFSK+CMRNRPALSLR+KPMKKAMEEAGK+LIEFLDTIFFVLR+NGFSKAYFSTANGVISKK+NRPALSLR
830	tr|A4FUG9|A4FUG9_BOVIN tr|L8J180|L8J180_9CETA	1	BXDC5 protein OS=Bos taurus GN=BXDC5 PE=2 SV=1;Ribosome production factor 1 OS=Bos mutus GN=M91_06480 PE=4 SV=1	33	4	0.002	1	0.12	99.99	0.36	99.99	0.333333	0.21	99.99	0.31	99.99	AGDKSGGSGK+EREALGDKAPPKPVPK+IIPQCISRDFTDLIVINEDR+LCEQLSTVIPNSHVYYR+LGHSIGRMFASLFPHNPQFIGR+MAKAGDKSGGSGK+TAAFPPGFSISEIKNKQR+VGIQELGPR
831	tr|A4FUX9|A4FUX9_BOVIN tr|F1MDA6|F1MDA6_BOVIN tr|L8IKS5|L8IKS5_9CETA	1	VPS45 protein OS=Bos taurus GN=VPS45 PE=2 SV=1;Uncharacterized protein OS=Bos taurus GN=VPS45 PE=4 SV=1;Vacuolar protein sorting-associated protein 45 OS=Bos mutus GN=M91_14436 PE=4 SV=1	26.3	13	0.005	7	0.24	0.04	0.22	0.03	1.09091	0.21	0.02	0.3	0.02	ENVDYLIQELR+ESSQVTSRSASR+ESSQVTSRSASRR+GSDLFSPK+GSDLFSPKDAVAITKQFLK+HSSNSLPGLMMDLRNKGVSEK+IDLSRVPGISKDLR+KLVSAVIEYGGKR+KMSGTVSKHVTVVGELSR+LVSAVIEYGGKR+NLMEDFQKKKPK+QVITKEYELFEFRR+QYISKMIEDSGPGMK
832	tr|A4FUY3|A4FUY3_BOVIN	1	LOC539976 protein OS=Bos taurus GN=LOC539976 PE=2 SV=1	13.7	7	0.002	2	0.14	0.01	0.3	0.04	0.466667	0.3	0.04	0.25	0.07	DLEAKPHMHEFR+DLEAKPHMHEFRLGVR+EGGPLLYDGIR+EGGPLLYDGIRLTMNSK+ETAARISQEIGNLMKEIETLVEEK+RVMESYFR+TKESLDVSR+TVTAEVQPQCGR+TVTAEVQPQCGRAVGFSSGTENPHGVK
833	tr|A4FV01|A4FV01_BOVIN tr|F1MC31|F1MC31_BOVIN	1	SF3B2 protein OS=Bos taurus GN=SF3B2 PE=2 SV=1;Uncharacterized protein OS=Bos taurus GN=SF3B2 PE=4 SV=1	15.7	7	0.002	2	0.11	0.01	0.38	0.04	0.289474	0.19	0.01	0.31	0.03	EDFSDMVAEHAAK+EEEELDR+KAQPQDSRGGSK+LAEIGAPIQAGSREELVER+LQTYTRQTGIVLNRPVLR+MGTPVPRPPQDMGQIGVR+QQGDHSLKEHELLEQQK+QTGIVLNRPVLR+RMNRFTVAELK+SSLGHSASETEEDTMSVSKK+TGIQEMREALQEK
834	tr|A4FV05|A4FV05_BOVIN tr|A8E654|A8E654_BOVIN tr|F1N6W9|F1N6W9_BOVIN	1	COL18A1 protein OS=Bos taurus GN=COL18A1 PE=2 SV=1;COL18A1 protein OS=Bos taurus GN=COL18A1 PE=2 SV=1;Uncharacterized protein OS=Bos taurus GN=COL18A1 PE=4 SV=2	15.7	26	0.007	12	0.17	0.02	0.28	0.02	0.607143	0.19	0.02	0.33	0.01	AATGQASSLLAGR+ATLPVVNLR+DVLQHPTWPQKSVWHGSDPSGR+ERGLKGQK+EVPHPTAR+FGMNSSDVPGPAGLPGVPGR+GADFQCFQQARAAGLAGTFR+GDPGAVGPPGSKGEVGADGAPGLPGLPGR+GEVGADGAPGLPGLPGR+GFPGPPGPPGVPGLPGEPGR+GSLGEAGAPGPK+GSLGEAGAPGPKGSK+LQDLYSIVR+QHMQLLYTEPGATHTR+RADRATLPVVNLR+TAASFELPALDGRWTR
835	tr|A4FV11|A4FV11_BOVIN tr|F1N0S9|F1N0S9_BOVIN tr|L8IPS7|L8IPS7_9CETA	1	LOC530070 protein OS=Bos taurus GN=LOC530070 PE=2 SV=1;Uncharacterized protein OS=Bos taurus GN=FAM98A PE=4 SV=2;Protein FAM98A (Fragment) OS=Bos mutus GN=M91_20394 PE=4 SV=1	21.4	31	0.009	14	0.14	0.01	0.35	0.03	0.4	0.2	0.02	0.26	0.02	EKTACAINK+EKTACAINKVLMGR+GGGRGGYEHSSYGGR+GGHEQQTGGR+GGHEQQTGGRGGR+GGHEQQTGGRGGRGGYDHGGR+GGRAGQGGGWGGR+GGRGGRAGQGGGWGGR+GGRGGYDHGGR+GGRGGYDHGGRGGGR+GGYDHGGRGGGR+GGYEHSSYGGR+GGYEHSSYGGRGGHEQQTGGR+GGYEHSSYGGRGGHEQQTGGRGGR+IEAINQAVANEYEVRR+LCAWLVSELR+QDGPQQPAGGRGGGR
836	tr|A4FV30|A4FV30_BOVIN tr|F6R7X9|F6R7X9_BOVIN tr|L8IBU6|L8IBU6_9CETA tr|Q5BIM6|Q5BIM6_BOVIN	1	Coiled-coil domain containing 8 OS=Bos taurus GN=CCDC8 PE=2 SV=1;Uncharacterized protein OS=Bos taurus GN=CCDC8 PE=4 SV=1;Coiled-coil domain-containing protein 8 OS=Bos mutus GN=M91_02222 PE=4 SV=1;Coiled-coil domain containing 8 OS=Bos taurus GN=CCDC8 PE=2 SV=1	33.1	21	0.006	8	0.19	0.02	0.29	0.03	0.655172	0.18	0.02	0.31	0.02	AETPAVQEAESSAAGR+AETPAVQEAESSAAGRATGATAGAR+AGPIAVQEAEAVDNQR+ATGATAGARTRKPVK+ECVSQVSWGKLKR+EETASRAQGGEAADEQRR+KMPVSYLGSK+LIQFLEEEGR+MPVSYLGSK+RGEKKPSAPPPR+VERDSASVPGSASLGCNVGNARDGR+VNLPVPMFDDSPGPQQSKADR+VPRAGEARSLR+VRKMPVSYLGSK
837	tr|A4FV36|A4FV36_BOVIN tr|L8IYP3|L8IYP3_9CETA	1	SPATA20 protein OS=Bos taurus GN=SPATA20 PE=2 SV=1;Spermatogenesis-associated protein 20 OS=Bos mutus GN=M91_15589 PE=4 SV=1	18.3	14	0.004	4	0.18	0.02	0.25	0.02	0.72	0.22	0.03	0.34	0.02	AQQMALHTLKMMANGGIR+DRSVTVSSSVPMPAGGK+GFLLPGAGPVLALSYR+GMRPKEGAFYVWTVK+LHGFTGHK+MLAAWNGLMVSGFAVTGAVLGQER+RVPVALPEMVR+SVTVSSSVPMPAGGK+SVTVSSSVPMPAGGKGSR+TVLMRIR+VPVALPEMVR+VTTALLARSAISMGDR+YSLELTAAR
838	tr|A4FV44|A4FV44_BOVIN tr|F1MYS2|F1MYS2_BOVIN tr|L8J0N1|L8J0N1_9CETA	1	FCHO2 protein OS=Bos taurus GN=FCHO2 PE=2 SV=1;Uncharacterized protein (Fragment) OS=Bos taurus GN=LOC540808 PE=4 SV=2;FCH domain only protein 2 (Fragment) OS=Bos mutus GN=M91_09414 PE=4 SV=1	22.8	5	0.002	3	0.22	0.03	0.18	0.03	1.22222	0.27	0.05	0.3	0.06	EGATQREIEKAAVK+LQELIKEVQKYGEEQVK+NSGFDVLYHNMK
839	tr|A4FV70|A4FV70_BOVIN	1	ALOX12E protein OS=Bos taurus GN=ALOX12E PE=2 SV=1	20.7	18	0.006	11	0.18	0.01	0.31	0.02	0.580645	0.2	0.01	0.3	0.01	ATAGLTYR+DLALKGSLDLTNSVRR+DLDFSLSLAKVLK+GLLDVKSSLYGQDALRLWGVISR+GSLDLTNSVRR+LVLPPEMEDLK+QQYVAAPLVMLKLQPDGR+TFIKFLGRR+TQKTFIKFLGR+WVQGNEIICLPEGTARTVR+YVEKMVSLFYK
840	tr|A4FV74|A4FV74_BOVIN	1	COPS8 protein OS=Bos taurus GN=COPS8 PE=2 SV=1	32.5	18	0.006	3	0.17	0.02	0.31	0.03	0.548387	0.22	0.06	0.27	0.02	IPPAIKSANSELGGIWSVGQR+LTDYVAFLEN+MPVAVMAESSFSFKK+MVMPKKPVAGALDVSFNR+SANSELGGIWSVGQRIWQR
841	tr|A4FV92|A4FV92_BOVIN	1	CYP27A1 protein OS=Bos taurus GN=CYP27A1 PE=2 SV=1	22.3	17	0.004	3	0.06	0.06	0.34	0.04	0.176471	0.14	0.04	0.39	0.05	AKAAIPSALPAAQAAEAPGTGPGDR+AKAAIPSALPAAQAAEAPGTGPGDRR+AKYGPIWINR+EEIEAQIK+LIDQKLEEIEAQLKTENPEK+MGALGSARLR+MGALGSARLRWALLGR+MPLLKAVLKETLR+RLRSLDELSGPGQLR+TQHPFGSVPFGYGVR+TQHPFGSVPFGYGVRACLGR
842	tr|A4IF67|A4IF67_BOVIN tr|L8HLQ7|L8HLQ7_9CETA	1	Uncharacterized protein OS=Bos taurus GN=ZNF200 PE=2 SV=1;Zinc finger protein 200 OS=Bos mutus GN=M91_09088 PE=4 SV=1	19.1	12	0.004	9	0.21	0.01	0.25	0.02	0.84	0.23	0.01	0.29	0.01	EERLNTSIPKER+EESSDCDEMDCSMVPEQSPDCQK+LSNCTRHEK+MAAKVVPMPPKPK+SFILRVPPNSKLGQDLLR
843	tr|A4IF71|A4IF71_BOVIN tr|F1N7H1|F1N7H1_BOVIN tr|L8IIY5|L8IIY5_9CETA	1	PKP2 protein OS=Bos taurus GN=PKP2 PE=2 SV=1;Uncharacterized protein OS=Bos taurus GN=PKP2 PE=4 SV=2;Plakophilin-2 OS=Bos mutus GN=M91_17482 PE=4 SV=1	13.9	22	0.006	7	0.2	0.02	0.31	0.02	0.645161	0.19	0.02	0.27	0.03	ANGLLDFDIFYNVTGCLRNMSSAGPEGR+AVSMLEADHTPPSK+KTAVSLLR+LAGSSGQAVK+LAGSSGQAVKSLR+LKLAGSSGQAVKSLR+LLQVLKQTR+NLSLQNEIAK+NLSRNLSLQNEIAK+NLVFEDNDNK+NMSSAGPEGR+NMSSAGPEGRK+NMSSAGPEGRKVMR+TGTAPTYEGR+TGTAPTYEGRWGR
844	tr|A4IF73|A4IF73_BOVIN	1	IRX4 protein OS=Bos taurus GN=IRX4 PE=2 SV=1	23.4	10	0.003	6	0.24	0.05	0.29	0.04	0.827586	0.13	0.04	0.26	0.02	AWLQEHRKNPYPTK+CADEKRPYAEGEEEEGGEEEGR+DLLAVPKAGGKPFCA+IMLAIITK+KENKMTWPPR+LPLAAGGGAALDQDLERAR+NWVDGVFHDPILR+SALLDRGPLGR+STKVEEPIGK
845	tr|A4IFA2|A4IFA2_BOVIN tr|Q08DN2|Q08DN2_BOVIN	1	LNX1 protein OS=Bos taurus GN=LNX1 PE=2 SV=1;Ligand of numb-protein X 1 OS=Bos taurus GN=LNX1 PE=2 SV=1	25.7	27	0.005	5	0.22	0.01	0.29	0.02	0.758621	0.21	0.03	0.26	0.03	DGRIKTGDILLNVNGIELTEVSR+DGRLLPGDIILK+EDSENTTVLDVFPR+INRTDPNENLSIR+IRCGDILLAVNGR+LLPGDIILK+MDEPGVFIFNVLDGGVADR+QPCQVLRLTVLR+SIVEGTPAYNDGR+STTGMIHACLAR+TKSGSTVVSQADQGR+VNGMDISNVRHNYALR
846	tr|A4IFB3|A4IFB3_BOVIN tr|L8IJU3|L8IJU3_9CETA	1	Perilipin OS=Bos taurus GN=PLIN PE=2 SV=1;Perilipin OS=Bos mutus GN=M91_16059 PE=3 SV=1	32.4	9	0.003	3	0.12	0.07	0.4	0.12	0.3	0.11	0.01	0.29	0.04	AKPSLVSRVGALANTLSR+ALQSTVSVVMWAPAAVLGTAGR+DIDNPPAEAER+DTAEYAANTRAGR+DTISTRLRSAR+GSLRSARGLGAEER+IASELKDTISTR+LASGGADLALGGVEK+MLHLTPAQATSSTKGRAMSLSDALK+QGHALAMWIPGVAPLSSLAQWGTSAAMQVVSR+VGALANTLSR
847	tr|A4IFE0|A4IFE0_BOVIN tr|F1MDJ4|F1MDJ4_BOVIN tr|L8HR73|L8HR73_9CETA	1	LOC616839 protein OS=Bos taurus GN=LOC616839 PE=2 SV=1;Uncharacterized protein OS=Bos taurus GN=CCDC93 PE=4 SV=1;Coiled-coil domain-containing protein 93 OS=Bos mutus GN=M91_09952 PE=4 SV=1	41	19	0.005	8	0.23	0.03	0.27	0.02	0.851852	0.18	0.02	0.28	0.03	ETKQFFTLYNTLDDKK+IALSEKIVSVLPRMK+IHATLLEYGR+IHATLLEYGRR+IKGLSPFDK+KQENKMR+KTLSGGESHGALTSAMTHNEDLDRR+KTLTELKGHSEK+KVISLNKQILQK+LDKEQTALEK+LDKEQTALEKIEAK+LYFKTVKEFK+LYKIRLLQAR+MTAMAHEESRPTASSVGQIVGLCSAEIK+NEMLLSKVKAK+QFFTLYNTLDDKK+QFFTLYNTLDDKKVYLEK+QMEQIVEGIKQSR+QQGAEELLDEESR+QSELSAEESPEKLGISQLHRR+RAIETKEEMGDYIR+TYSLPEDDDFMKR
848	tr|A4IFE5|A4IFE5_BOVIN tr|L8IMU4|L8IMU4_9CETA	1	LRRC8D protein OS=Bos taurus GN=LRRC8D PE=2 SV=1;Leucine-rich repeat-containing protein 8D OS=Bos mutus GN=M91_07015 PE=4 SV=1	21.9	14	0.005	1	0.4	99.99	0.1	99.99	4	0.21	99.99	0.29	99.99	CFESPWTTKALSETACEDSEENK+DGEQAKALFEK+EKKDPTGR+IPLKEYSFEKVR+KMMNVAELELQNCELER+LPAQLGQCR+LWHNKIVTIPPSITHVK+NDFAFLLHMVDQYDQLYSKR+RFGVFLSEVSENK+TGFKFSAEKPVIEVPSMTILDKK+TLNLGQNCITSLPEK+VEHLTGYEVFECTHNMAYMLK
849	tr|A4IFE6|A4IFE6_BOVIN tr|L8HTR2|L8HTR2_9CETA	1	ABCE1 protein OS=Bos taurus GN=ABCE1 PE=2 SV=1;ATP-binding cassette sub-family E member 1 OS=Bos mutus GN=M91_06757 PE=3 SV=1	20.4	24	0.007	12	0.18	0.01	0.29	0.01	0.62069	0.18	0.01	0.34	0.02	AAKGTVGSILDR+CPFGALSIVNLPSNLEK+DASLVFKVAETANEEEVKK+DPNNYRPRINK+GTVGSILDR+INKLNSIKDVEQK+LCIEVTAQSK+LNSIKDVEQK+LTRIAIVNHDK+MCMYKYPGMK+NVEDLSGGELQR+QRLKAAITIR
850	tr|A4IFF6|A4IFF6_BOVIN	1	NEK3 protein OS=Bos taurus GN=NEK3 PE=2 SV=1	19.6	11	0.003	6	0.19	0.03	0.26	0.02	0.730769	0.23	0.03	0.29	0.03	EEKARSPGPLR+GSLARLIQK+HPNIVAFK+ISRKEAVLLAK+LFPEDTILHWFTQMCLGVNHIHK+NLVESALRR+NLVESALRRVNR+VIGEGSFGRALLVQQESSNR+VLRVIGEGSFGRALLVQQESSNR
851	tr|A4IFH7|A4IFH7_BOVIN tr|L8IR31|L8IR31_9CETA	1	MAP2K3 protein OS=Bos taurus GN=MAP2K3 PE=2 SV=1;Dual specificity mitogen-activated protein kinase kinase 3 (Fragment) OS=Bos mutus GN=M91_06552 PE=4 SV=1	29.5	5	0.002	2	0.13	0.02	0.29	0.03	0.448276	0.26	0.02	0.32	0.01	EGHVKMCDFGISGYLVDSVAK+ISCMSKPPAPSPTLPR+ISCMSKPPAPSPTLPRNLDSR+NLDSRAFITIGDR+QVVEEPSPQLPADR+TDIAAFVK+TMDAGCKPYMAPER+VRHAQSGTIMAVK
852	tr|A4IFH8|A4IFH8_BOVIN tr|F1N207|F1N207_BOVIN tr|L8I9R7|L8I9R7_9CETA	1	Chloride anion exchanger OS=Bos taurus GN=SLC26A3 PE=2 SV=1;Chloride anion exchanger OS=Bos taurus GN=SLC26A3 PE=3 SV=1;Chloride anion exchanger (Fragment) OS=Bos mutus GN=M91_01654 PE=3 SV=1	15.8	13	0.004	4	0.19	0.01	0.3	0.01	0.633333	0.2	0.01	0.3	0.02	GMLMQFVEIR+HHKTLLDHLK+HISVGPFPVLSMMVGAVVVR+IQVDVYIVGTDDDFIEKLK+LDDFTINTNGGLR+LDDFTINTNGGLRNR+SGVQESTGGK+TQFPKCSMLANVGR+VIVAATVTILSGIIQLLMGVLR
853	tr|A4IFK3|A4IFK3_BOVIN	1	LMOD1 protein OS=Bos taurus GN=LMOD1 PE=2 SV=1	27.5	27	0.006	13	0.19	0.01	0.28	0.01	0.678571	0.21	0.02	0.3	0.02	AAPKNSPGK+DAGKKPLGPRR+DEEKQRNVSR+DKDEADGR+DQLLAAIR+ELDVVDPDGSVPVGLR+ELDVVDPDGSVPVGLRQR+GSMKKSISR+KEAGKEGPAAPR+LGYHFELAGPRMTVTNLLSRNMDR+MTVTNLLSRNMDRQR+NQTEKPSTGAYNR+NSLSPATQR+NSLSPATQRK+NSLSPATQRKMGDK+NSRDQLLAAIR+TEMEMAKLLK+VFALANTR
854	tr|A4IFL7|A4IFL7_BOVIN tr|F1MWF6|F1MWF6_BOVIN tr|L8IXK0|L8IXK0_9CETA	1	ACAP3 protein OS=Bos taurus GN=ACAP3 PE=2 SV=1;Uncharacterized protein (Fragment) OS=Bos taurus GN=ACAP3 PE=4 SV=2;Arf-GAP with coiled-coil, ANK repeat and PH domain-containing protein 3 (Fragment) OS=Bos mutus GN=M91_10929 PE=4 SV=1	26.3	15	0.004	3	0.13	0.03	0.32	0.07	0.40625	0.18	0.02	0.35	0.03	CIQEFISLHLDES+CQRHHSSPR+CQRHHSSPRAPAPR+DKYVEKK+DSHGRAPLHHATLLGR+FGDSLQEMVTYHMILFDQAQRSVR+GESVLQRVQNVAGNSQCGDCGQPDPR+HRPHEVEEATGALILARK+KFVRRPPSAPAR+LARMAEEMR+LCSSMIEAGK+LCSSMIEAGKAYVTTNR+LVKLCSSMIEAGK+MEPVLPSVAALCSGSMEPR+QQLHNFVKEDVR+RASNAFKTWNR+SKVRMEPVLPSVAALCSGSMEPR+SLGVHCSKVR+VQNVAGNSQCGDCGQPDPR
855	tr|A4IFR5|A4IFR5_BOVIN tr|L8HW10|L8HW10_9CETA	1	SH3RF2 protein OS=Bos taurus GN=SH3RF2 PE=2 SV=1;Putative E3 ubiquitin-protein ligase SH3RF2 OS=Bos mutus GN=M91_02386 PE=4 SV=1	28.4	13	0.005	4	0.17	0.03	0.23	0.04	0.73913	0.21	0.05	0.35	0.03	ALCNYRGQNPGDLRFNK+ATSTPTLRR+ATSTPTLRRGPGSR+CPECRTLVFCSIEALPANLLLVR+DDIITVISR+DKDRSENQDCLTFLK+EIPIKSEPLPKPPASAPPSILVKPENSR+GSDTRIHTAASSLIMEGK+IHMDGVPRAKALCNYR+LLDGVRAGQSSGR+NLSLVSSPSR+NLSLVSSPSRGK+SGCHSGQQTDLR+SPASLGTLGQGSLRK+SPASLGTLGQGSLRKGR+VLGKYQDGWLRGVSLVTGR
856	tr|A5D784|A5D784_BOVIN tr|L8J067|L8J067_9CETA	1	CPNE8 protein OS=Bos taurus GN=CPNE8 PE=2 SV=1;Copine-8 OS=Bos mutus GN=M91_17179 PE=4 SV=1	17.7	14	0.004	3	0.21	0.02	0.29	0.02	0.724138	0.23	0.02	0.25	0.02	DGSQYFVLLIVTDGVISDMAQTK+DIVQFVPFRDYIDRSGNHILSMAR+NLLDRDTFSK+SGNHILSMAR+SGNHILSMARLAK+TVKVEVYDWNR+VEVSVSCRNLLDR+YTSSAGLGDLNQLSTAIPATR
857	tr|A5D788|A5D788_BOVIN tr|L8IXD7|L8IXD7_9CETA	1	SGPL1 protein OS=Bos taurus GN=SGPL1 PE=2 SV=1;Sphingosine-1-phosphate lyase 1 OS=Bos mutus GN=M91_05235 PE=3 SV=1	31	10	0.003	3	0.07	0.06	0.4	0.08	0.175	0.21	0.07	0.25	0.04	AASYFGMKIIR+AGYPLEQPFDFR+AKTTGMGAIYGMAQATIDR+DFDIYRLFNLMNAK+DIRESVTQIMKNPK+DVLWQEGK+ESVTQIMK+EYSSKDVLWQEGKASGAVYSGEK+FLKSELENIK+GSSVLLYSDK+GSSVLLYSDKK+GSSVLLYSDKKYR+IIRVPLNKMMEVDVR+MMEVDVRAMRR+NPKAKTTGMGAIYGMAQATIDR+NYVNGHCTK+TPEIVAPQSAHAAFDK+TTGMGAIYGMAQATIDR+VKGVTSISADTHKYGYAPK
858	tr|A5D799|A5D799_BOVIN tr|L8HR27|L8HR27_9CETA	1	CHST10 protein OS=Bos taurus GN=CHST10 PE=2 SV=1;Carbohydrate sulfotransferase 10 OS=Bos mutus GN=M91_15024 PE=4 SV=1	27.9	12	0.003	3	0.22	0.02	0.36	0.04	0.611111	0.17	0.01	0.23	0.06	DKFVHNPR+EAGIDHLVAYPTIPLGITAYNR+ILFCQTPKVGNTQWK+LSSFSEAEIQKR+NLSHTAVSK+NLSHTAVSKFVLDR+QEFLFLTAVPDAGR+TKVEQYFLGISKR+VEQYFLGISKR
859	tr|A5D7A3|A5D7A3_BOVIN	1	MKLN1 protein OS=Bos taurus GN=MKLN1 PE=2 SV=1	24.6	9	0.003	2	0.16	0.01	0.37	0.09	0.432432	0.03	0.02	0.41	0.11	DSGMVPMTGFTQR+EDSCNAGPEDIQSR+EQEAIRLCLK+IDEQMFPCRFIK+KDSGMVPMTGFTQR+LVLKGDFDACEELIEK+NRCLYVFGGQRSK+NSKSLKSDFYR+QIYTLGRYLDSSVR+QIYTLGRYLDSSVRNSK+TKIALEHPMLTDLHDK+TQLFDTLVNFFPDSMTPPK+VHYLFGGNPGKSCSPKMR+WSSFSSTYLPENILVDKPNDQSSR
860	tr|A5D7A6|A5D7A6_BOVIN tr|F1N165|F1N165_BOVIN tr|L8IP81|L8IP81_9CETA	1	U3 small nucleolar RNA-associated protein 11 OS=Bos taurus GN=UTP11L PE=2 SV=1;U3 small nucleolar RNA-associated protein 11 OS=Bos taurus GN=UTP11L PE=3 SV=1;U3 small nucleolar RNA-associated protein 11 OS=Bos mutus GN=M91_09535 PE=3 SV=1	16.2	13	0.003	6	0.15	0.01	0.3	0.02	0.5	0.18	0.01	0.35	0.01	EKVKGVNNQTR+HLGLLEKK+HLGLLEKKK+LMRTQDIK+LRADDYR+TQDIKYIEMKR
861	tr|A5D7B4|A5D7B4_BOVIN	1	ST5 protein OS=Bos taurus GN=ST5 PE=2 SV=1	31.3	34	0.007	13	0.17	0.01	0.29	0.02	0.586207	0.17	0.02	0.32	0.01	AGGAAGVGGEAGPPPER+DSFYRLEKRPGR+EDQKENIR+EKISAWEGRQEASPR+FLEVFMESQMFAGFIQDR+IEQALKEQPGR+INSIYNAKR+IPKLVQR+KSHRLPR+LKELPVEEALMVNLGSDR+LKKLSMSSIETSSLR+LLPSGKGPR+LSMSSIETSSLR+LVHIQSMLKRAPSYR+LVQRINSIYNAK+MTMTANKNSSITHGAGGTKAPR+NTYLPEVSYQFPK+QEASPRMSVCGEK+QMDDEDTLLPR+RPGRSEPSALLRGHSSR+SEPSALLRGHSSR+SGNWSERKSHR+SGSRLLLKDWHHR+SLMESPFPAPGKTIK+SPIYPLSDSETSACR+SPIYPLSDSETSACRYPSR+STLEENAYEDIVGDLPKENPYEDVDL…
862	tr|A5D7C4|A5D7C4_BOVIN	1	TNPO3 protein OS=Bos taurus GN=TNPO3 PE=2 SV=1	10.6	11	0.005	7	0.09	0.03	0.33	0.04	0.272727	0.14	0.02	0.37	0.03	AYIQRLLHALAR+DANCSVMR+DANCSVMRFLR+DHMAQHFNGLLEIAR+GLPKETTGGAVTVTHK+GTALVLAR+IFTELCETFLEK+IQTSFYELPTDSHASLR+IVERCCR
863	tr|A5D7C7|A5D7C7_BOVIN	1	LOC522691 protein OS=Bos taurus GN=LOC522691 PE=2 SV=1	26	15	0.003	3	0.15	0.01	0.24	0.06	0.625	0.21	0.02	0.37	0.04	DLKLQREGLR+DQLPILNR+DQLPILNRLAK+EELEEAR+ERFLEVAREDPGNLNAWANLAHVYGR+GEGASSLRDR+GEGASSLRDRR+GKLGLGGMPDR+LDGIFLELGSK+LGMIIER+LPAFNRTLALLQQVLK+NHLACAK+QDMAIGTCNMALDVLR+QELELASAPQRPAVR+TLALLQQVLKSSDPHPR
864	tr|A5D7D9|A5D7D9_BOVIN tr|L8IIS6|L8IIS6_9CETA	1	DHX15 protein OS=Bos taurus GN=DHX15 PE=2 SV=1;Putative pre-mRNA-splicing factor ATP-dependent RNA helicase DHX15 OS=Bos mutus GN=M91_04075 PE=4 SV=1	16.7	20	0.005	5	0.17	0.02	0.3	0.05	0.566667	0.18	0.04	0.31	0.01	AGRAGRTRPGK+AGTDGKDRDR+ASAQQRAGRAGR+CFRLYTEKAYK+DRFTDILVR+GVACTQPRR+GVACTQPRRVAAMSVAQR+IFEPPPPK+IFEPPPPKKQNGAIGR+KALVTGYFMQVAHLER+LDLGEDYPSGKKR+LYTEKAYK+LYTEKAYKTEMQDNTYPEILR+QKVYNPRIR+RGVACTQPR+TEMQDNTYPEILR
865	tr|A5D7E4|A5D7E4_BOVIN tr|F1MUW2|F1MUW2_BOVIN tr|L8IU75|L8IU75_9CETA	1	AQR protein OS=Bos taurus GN=AQR PE=2 SV=1;Uncharacterized protein OS=Bos taurus GN=AQR PE=4 SV=2;Intron-binding protein aquarius OS=Bos mutus GN=M91_16477 PE=4 SV=1	17	26	0.009	14	0.18	0.02	0.26	0.02	0.692308	0.21	0.01	0.31	0.02	ADVTINLNVR+AGMQPGLTMVVGPPGTGK+ASELLRSGLDR+GCEIQGMLDDKGR+GPYPYNQPKR+IFTQLEEFRASELLR+IIAMTCTHAALK+ISILTTYNGQKHLIRDIINR+ITFPVRSGK+KNDEKMDPEAR+LELELKKTPK+LGHGEEELETEKDFSRYGR+LNLQFLTLHDYLLR+MKPWQSEYGGVVFGGWAR+RNTIQFTHTQIEAIR+SGLDRSKYLLVK+SQVQQLISLPMWMGLQPAR+TLIVEPHVIPNR+TLIVEPHVIPNRGPYPYNQPK+VGVPTVDLDAQGR
866	tr|A5D7E6|A5D7E6_BOVIN tr|L8HZY1|L8HZY1_9CETA	1	Tetraspanin OS=Bos taurus GN=CD82 PE=1 SV=1;Tetraspanin (Fragment) OS=Bos mutus GN=M91_08425 PE=3 SV=1	21.2	3	0.001	2	0.18	0.04	0.2	0.01	0.9	0.23	0.09	0.37	0.04	CCGWVSYLNWTENTELMNR+DWPVYQEGCMEK+KSDEDDALMMPQK+QEMGSIVTK
867	tr|A5D7H4|A5D7H4_BOVIN tr|L8I6A0|L8I6A0_9CETA	1	RNF6 protein OS=Bos taurus GN=RNF6 PE=2 SV=1;E3 ubiquitin-protein ligase RNF6 OS=Bos mutus GN=M91_00445 PE=4 SV=1	38.4	34	0.009	9	0.18	0.02	0.27	0.05	0.666667	0.17	0.04	0.29	0.01	AVSRTNPHSGEFR+GQSSVEGSLSPLGR+IRPGESSDRDSIANR+ISLERNSGGFHR+ISLERNSGGFHRSISR+LEPIRLR+LGSRGQSSVEGSLSPLGR+LRNGIGGASGSPGPGAPLTHLDTPSGR+NSGGFHRSISR+NSGGFHRSISRQER+NTNQRLEPIRLR+NYEHSGADGEPGK+QERSGMRTYVSTITVPLR+QPVLGSGLANSG+RIRPGESSDRDSIANR+SDAGPPGGATGPPTGGAPR+SDAGPPGGATGPPTGGAPRGR+SGQNGNQTWR+TGNATRSGQNGNQTWR+TRLGSRGQSSVEGSLSPLGR+TRSQAAGNLSRGAR+TRSRVGLAENR+VELTPLHTLASDPVVGR+VSEHELAEPSSTALRSILR+WLSENCTCPV…
868	tr|A5D7J9|A5D7J9_BOVIN	1	CCDC9 protein OS=Bos taurus GN=CCDC9 PE=2 SV=1	23.1	14	0.004	5	0.16	0.02	0.28	0.03	0.571429	0.19	0.02	0.34	0.05	AGLGGAGDMTLSMTGR+AGLGGAGDMTLSMTGRER+DGPAVALEPSHR+ENVAVEKNLGPSR+IPPQHGGRAGMGR+IPPQHGGRAGMGRTSR+KAELEGVAVTGPRK+MSAALDLKSK+QGRRAGLGGAGDMTLSMTGR+RAGLGGAGDMTLSMTGR+RAGLGGAGDMTLSMTGRER+SPGTPRPPGVSKGGR+SPGTPRPPGVSKGGRIPPQHGGR+WEMKEAMSTAPEPPQPALPK
869	tr|A5D7K0|A5D7K0_BOVIN tr|L8IBE6|L8IBE6_9CETA	1	BLVRA protein OS=Bos taurus GN=BLVRA PE=2 SV=1;Biliverdin reductase A (Fragment) OS=Bos mutus GN=M91_15826 PE=4 SV=1	35.5	10	0.003	5	0.16	0.08	0.21	0.09	0.761905	0.15	0.08	0.26	0.07	DLLKGSLLFTAAPLEEER+DLRNPHASSAFLNLIGFVSR+EDQYMKMTVCLETENK+EVVGKDLLKGSLLFTAAPLEEER+GKVLHEEHVELLMEEFAFLK+GSLLFTAAPLEEER+KEDQYMKMTVCLETENK+MTVCLETENK+NPHASSAFLNLIGFVSRR+QFLNAGKHVLVEYPMTLSWVAAK
870	tr|A5D7L2|A5D7L2_BOVIN tr|L8HT77|L8HT77_9CETA	1	SH2D3C protein OS=Bos taurus GN=SH2D3C PE=2 SV=1;SH2 domain-containing protein 3C OS=Bos mutus GN=M91_12693 PE=4 SV=1	20.5	12	0.003	3	0.16	0.01	0.3	0.04	0.533333	0.27	0.06	0.24	0.06	EVSETLVQRNGDFLIR+EWAAAEASGR+FKFFKFK+FSKEKYILDSSPEK+GTMGNMFSFAAVMGALDMAQIAR+HTEGAILYEK+IPREVSETLVQR+LSSTDLRSHAWYHGR+MTEGTKKASK+SDGCPTSTSLPHPR+TFPLRYLEACYGLGQGGGKAASPASPSGPK+VTRSDGCPTSTSLPHPR+VVPGTIASR+WGMELLTLPHGR+YILDSSPEK
871	tr|A5D7L6|A5D7L6_BOVIN tr|L8HS68|L8HS68_9CETA	1	MRAS protein OS=Bos taurus GN=MRAS PE=2 SV=1;Ras-related protein M-Ras OS=Bos mutus GN=M91_14276 PE=4 SV=1	26.9	2	0.001	2	0.21	0.07	0.27	0.11	0.777778	0.27	0.04	0.21	0.01	DRESFPMILVANKVDLMHLR+EQGKEMATKHNIPYIETSAK+ESFPMILVANKVDLMHLR+QQIPEKSQK+TKWRGDR
872	tr|A5D7M0|A5D7M0_BOVIN tr|L8ITG6|L8ITG6_9CETA	1	RBL2 protein OS=Bos taurus GN=RBL2 PE=2 SV=1;Retinoblastoma-like protein 2 OS=Bos mutus GN=M91_16276 PE=4 SV=1	29.6	38	0.009	10	0.19	0.03	0.3	0.02	0.633333	0.18	0.03	0.27	0.03	CLNTGSGAETAER+DLCAKLDISDELRK+DRTSRDSSPVMR+EINSMIRTGETPTKK+GDLIQFYNNIYIRQMK+GILLEDGSESPAKR+ICPENHSALLR+IFLGEDAEEEIGTLSR+IWTCFEFSIIQCPELMMDR+KKIWTCFEFSIIQCPELMMDR+KRGILLEDGSESPAK+KTSSLSLFFRK+LCSLHDGLVLEAK+LDISDELRK+LEQTLRSCSR+LFVENDSPTDGGTPGR+LQDVANDR+LTGANSDVEEEER+NAPSERLEQTLR+NEAMLSPREK+NFTVSAVIFK+NSGSSDSR+NSGSSDSRSHQNSPTELNKDR+RICPENHSALLR+RLFVENDSPTDGGTPGR+RLGDMDLSGILEQDAFHR+RRLFVENDSPTDGGTPGR+…
873	tr|A5D7M5|A5D7M5_BOVIN tr|F1MKL5|F1MKL5_BOVIN tr|L8IJ40|L8IJ40_9CETA	1	ADAM3A protein OS=Bos taurus GN=ADAM3A PE=2 SV=1;Uncharacterized protein OS=Bos taurus GN=ADAM3A PE=4 SV=1;Disintegrin and metalloproteinase domain-containing protein 18 OS=Bos mutus GN=M91_10721 PE=4 SV=1	12.8	7	0.002	2	0.13	0.08	0.3	0.07	0.433333	0.25	0.16	0.19	0.18	EKSLLQSSHDLAYLLIYR+ISTDGDAHDVLQR+NDIDVQYTYLGGHICMSANLRTR+NDIDVQYTYLGGHICMSANLRTRR+QSFLDSNLLVYSYNK+TAYLIKR+TCMILDR+TKQCVTLFGK
874	tr|A5D7M8|A5D7M8_BOVIN tr|L8I901|L8I901_9CETA	1	LOC529934 protein (Fragment) OS=Bos taurus GN=LOC529934 PE=2 SV=1;Protein FAM38A (Fragment) OS=Bos mutus GN=M91_08391 PE=4 SV=1	17.2	5	0.002	4	0.2	0.02	0.25	0.01	0.8	0.24	0.02	0.31	0.02	EEEEEVDEQDVMKVLR+EKLEDLGLKQFR+LEDLGLKQFR+NLLMALFIK
875	tr|A5D7N6|A5D7N6_BOVIN tr|L8HT02|L8HT02_9CETA	1	Kinesin-like protein OS=Bos taurus GN=KIF23 PE=2 SV=1;Kinesin-like protein OS=Bos mutus GN=M91_12854 PE=3 SV=1	31.1	17	0.005	6	0.19	0.03	0.31	0.03	0.612903	0.15	0.02	0.33	0.01	AGSQLGPGYQHHAQPK+CLDMLFNSIGSFQAKR+DSKLTHLFK+EAGNINQSLMTLR+EAGNINQSLMTLRTCMEVLR+EDKNHNMYVAGCTEVEVK+EKVISGQK+ENQTYGTNKMVPYR+ENYIQGKLNEK+GDVYKTRGGGQSVQFTEIETLK+GSQTSLKDPVGVYCR+IPPYNTPLNVTSIARR+ISLVDLAGSER+LEIERLEK+LIVCVNPK+LQGMVTETTMK+NAPPIRLR+NEIEVEEDHCSR+NGLLFTYGVTGSGK+NKTLEYK+NYFDGEGKVR+RSSTVAPAQPDGTESEWTDVETR+RYRNQAR+TEKPERPSRER+TKAEGNRLR+TNRTKAEGNR
876	tr|A5D7P7|A5D7P7_BOVIN tr|L8J031|L8J031_9CETA	1	ABCB6 protein OS=Bos taurus GN=ABCB6 PE=2 SV=1;ATP-binding cassette sub-family B member 6, mitochondrial OS=Bos mutus GN=M91_13950 PE=3 SV=1	11	11	0.003	3	0.16	0	0.28	0.01	0.571429	0.16	0.02	0.39	0.01	FYDISSGCIR+IDGQDVSQVTQASLR+LAMGVWIK+LAMGVWIKFR+LFSHLHELSLRWHLGR+LSGGEKQR+LSTVVSADQILVIK+LSTVVSADQILVIKDGRIVER+RAMNMQENATR+RAMNMQENATRAR
877	tr|A5D7Q6|A5D7Q6_BOVIN	1	PCDHGA2 protein OS=Bos taurus GN=PCDHGA2 PE=2 SV=1	17.1	11	0.004	6	0.16	0.02	0.3	0.04	0.533333	0.14	0.03	0.35	0.02	ASEPGLFAVGLHTGEVR+DINDNAPRFGVEEVELK+DLGLEPLALAERGAR+GSFVGSVAK+IDREELCAQSAR+IPLKSAHDADVGENTLQK+NGSLVTAGR+NGSLVTAGRIDR+SAEPGYLVTKVVAVDR+SGMDGNKYPELVLAR+SGMDGNKYPELVLARALDR+TQLFALNPRNGSLVTAGR
878	tr|A5D7S1|A5D7S1_BOVIN	1	ATRIP protein OS=Bos taurus GN=ATRIP PE=2 SV=1	18.1	23	0.005	8	0.15	0.01	0.33	0.02	0.454545	0.13	0.04	0.32	0.02	ALTVVLHRQWLTVR+AMEEEVLIKNGEIK+DSLHQTESILEEQR+LDGMSKYPAGKNR+LFTVHCVEVLHQYDQVMPGVSTLIR+LQSLQSELQFK+MAGISASGSR+NEEGSSDRDPAEGGGR+SGAPADPPTHPSR+TQALSEKEKEFSK
879	tr|A5D7T6|A5D7T6_BOVIN tr|F1MFX0|F1MFX0_BOVIN	1	YY1 protein OS=Bos taurus GN=YY1 PE=2 SV=1;Uncharacterized protein (Fragment) OS=Bos taurus GN=YY1 PE=4 SV=2	33.1	11	0.004	5	0.16	0.01	0.3	0.02	0.533333	0.21	0.02	0.32	0.02	DNSAMRK+EDDAPRTIACPHK+EEVVGGDDSDGLR+FAQSTNLKSHILTHAK+GYLGGGAGAAGGADAGNK+GYLGGGAGAAGGADAGNKK+IHTGDRPYVCPFDGCNK+QLAEFARMKPR+SGGGGGGSSSSGGGR+SGGGGGGSSSSGGGRVK+SGGGGGGSSSSGGGRVKK
880	tr|A5D7U7|A5D7U7_BOVIN tr|E1BD27|E1BD27_BOVIN	1	MAPK8IP1 protein OS=Bos taurus GN=MAPK8IP1 PE=2 SV=1;Uncharacterized protein OS=Bos taurus GN=MAPK8IP1 PE=4 SV=2	18.6	41	0.009	9	0.14	0.02	0.31	0.02	0.451613	0.19	0.02	0.34	0.02	AARRPGAGPPEAEPR+CSHFFQLK+DRGTSTDSPCR+DTLSLRPPR+EPEHMAALTK+FLNVFMSGRSR+GSLGEPPPPPR+GTSTDSPCR+GTSTDSPCRRSAATQMAPPGGPPAAPAGGR+NSDWVDQFR+RPGAGPPEAEPR+RSAATQMAPPGGPPAAPAGGR+SAATQMAPPGGPPAAPAGGR+TGEQTPPHEHICLSDELPPPSSPAPTK
881	tr|A5D982|A5D982_BOVIN tr|L8IR70|L8IR70_9CETA tr|Q3T151|Q3T151_BOVIN	1	Tyrosine-protein phosphatase non-receptor type OS=Bos taurus GN=PTPN2 PE=2 SV=1;Tyrosine-protein phosphatase non-receptor type 2 (Fragment) OS=Bos mutus GN=M91_15565 PE=4 SV=1;Tyrosine-protein phosphatase non-receptor type OS=Bos taurus GN=PTPN2 PE=2 SV=1	19.6	9	0.003	4	0.24	0.02	0.23	0.02	1.04348	0.15	0.06	0.31	0.08	DDREMLFK+FLSEDVKSYYTVHLLQLGNTR+IGLEEEKLTGDR+IMTEKYNGNR+TKAVVMLNR+TQEAPEESSESALR+TQEAPEESSESALRKR
882	tr|A5D986|A5D986_BOVIN tr|F1N0F2|F1N0F2_BOVIN tr|L8I4D9|L8I4D9_9CETA tr|Q2KI90|Q2KI90_BOVIN	1	Cytosolic sialic acid 9-O-acetylesterase homolog OS=Bos taurus GN=SIAE PE=2 SV=1;Uncharacterized protein OS=Bos taurus GN=SIAE PE=4 SV=1;Sialate O-acetylesterase OS=Bos mutus GN=M91_11060 PE=4 SV=1;Sialic acid acetylesterase OS=Bos taurus GN=SIAE PE=2 SV=1	16.7	13	0.004	4	0.16	0.01	0.27	0.01	0.592593	0.19	0.03	0.35	0.05	ATVTVTLCRDQEPIMKK+FASYIDDYMVLQR+GVIWYQGESNVNFNR+ILSVSSTQAQQELEDLAKVDLR+QTFHDGSQGQTER+SGSMPSDLK
883	tr|A5D9D7|A5D9D7_BOVIN tr|F1MET0|F1MET0_BOVIN tr|L8ISJ0|L8ISJ0_9CETA	1	Procollagen-lysine, 2-oxoglutarate 5-dioxygenase 3 (Fragment) OS=Bos taurus GN=PLOD3 PE=2 SV=1;Uncharacterized protein OS=Bos taurus GN=PLOD3 PE=4 SV=1;Procollagen-lysine,2-oxoglutarate 5-dioxygenase 3 OS=Bos mutus GN=M91_01020 PE=4 SV=1	18.2	10	0.003	5	0.22	0.02	0.28	0.02	0.785714	0.18	0.03	0.3	0.01	DDDDDQLFYTR+DMAMDICR+EVFSGSDTDPDMAFCKSLR+GGDVARTVGGGQKVR+GSDPVNPEK+KVIAPMLSR+LAGGYENVPTVDIHMK+LVGPEEALTPGEAR+QVGYEDQWLQLLR+TLGLGEEWR
884	tr|A5D9E0|A5D9E0_BOVIN tr|F6RYN2|F6RYN2_BOVIN tr|L8I9J1|L8I9J1_9CETA	1	Putative uncharacterized protein DKFZp686F02235 (Fragment) OS=Bos taurus GN=DKFZp686F02235 PE=2 SV=1;Uncharacterized protein OS=Bos taurus GN=RBM47 PE=4 SV=1;RNA-binding protein 47 OS=Bos mutus GN=M91_02354 PE=4 SV=1	31.5	34	0.009	8	0.17	0.02	0.28	0.02	0.607143	0.19	0.02	0.33	0.03	AGSIRGRGR+AVRELNNYEIRPGR+DVYEDELVPVFETVGR+GSYLGGYSAGR+IPRDVYEDELVPVFETVGR+IYELRLMMDFDGKNR+KSFGQFNPGCVER+LFIGGIPKMK+NEAKRAVR+NLMIETTEDTIK+NLMIETTEDTIKK+RAVRELNNYEIRPGR+TGYSMVQENGQR+VPEGVAGAPNEAALLALMER+YGGPPPGWEGPHPQR
885	tr|A5D9G1|A5D9G1_BOVIN tr|F1MJP7|F1MJP7_BOVIN tr|L8IUD7|L8IUD7_9CETA tr|Q2KIC1|Q2KIC1_BOVIN	1	UDP-N-acteylglucosamine pyrophosphorylase 1 OS=Bos taurus GN=UAP1 PE=2 SV=1;Uncharacterized protein OS=Bos taurus GN=UAP1 PE=4 SV=1;UDP-N-acetylhexosamine pyrophosphorylase OS=Bos mutus GN=M91_12685 PE=4 SV=1;UDP-N-acteylglucosamine pyrophosphorylase 1 OS=Bos taurus GN=UAP1 PE=2 SV=1	21.7	7	0.002	5	0.2	0.01	0.28	0.04	0.714286	0.23	0.03	0.24	0.06	ALAAQNIVEDMEQR+CIIPWYIMTSGR+ENVIFFQQGMLPAMSFDGK+GADCGAKVVEK+LLFNAGNIANHFFTVPFLR+MEPVPREVLGSATR+NKVSMAPDGNGGLYR+TLFQIQAER
887	tr|A5PJE5|A5PJE5_BOVIN	1	NFATC2IP protein OS=Bos taurus GN=NFATC2IP PE=2 SV=1	24.7	12	0.003	3	0.17	0.01	0.31	0.01	0.548387	0.19	0	0.34	0	EVNKRLQDLR+GGGGGRRAR+KMLLDQDTSPLPSPLPR+LGVADIIDCVVLASSPEAAETSPLLQLRVQGK+LLPLKIR+LSFFFDGTKLSGK+MLLDQDTSPLPSPLPRTKSR+YEEAMGLSGHKLSFFFDGTKLSGK
888	tr|A5PJF9|A5PJF9_BOVIN tr|L8IBD2|L8IBD2_9CETA	1	UEVLD protein OS=Bos taurus GN=UEVLD PE=2 SV=1;Ubiquitin-conjugating enzyme E2 variant 3 (Fragment) OS=Bos mutus GN=M91_16613 PE=3 SV=1	15.7	4	0.001	2	0.24	0.14	0.17	0.07	1.41176	0.14	0	0.38	0.07	GGMMDLDIFNLPNVEISK+ITEGVSDINSK+KVHSVSILAK+LQSSASSIHGLQQQLK+LQSSASSIHGLQQQLKL+LQYIITNVLKAQTSGK+VHSVSILAK
889	tr|A5PJG2|A5PJG2_BOVIN tr|L8I168|L8I168_9CETA	1	POPDC2 protein OS=Bos taurus GN=POPDC2 PE=2 SV=1;Popeye domain-containing protein 2 (Fragment) OS=Bos mutus GN=M91_01375 PE=4 SV=1	10.9	6	0.002	4	0.11	0.03	0.35	0.03	0.314286	0.19	0.02	0.32	0.03	KNLHLLLTKER+LFAKFGLR+LFAKFGLRFDIR+NLHLLLTK+NLHLLLTKER+YISRLFSVLLGYDISEK
890	tr|A5PJJ3|A5PJJ3_BOVIN tr|F1MY91|F1MY91_BOVIN tr|L8IDR8|L8IDR8_9CETA	1	MMP27 protein OS=Bos taurus GN=MMP27 PE=2 SV=1;Uncharacterized protein OS=Bos taurus GN=MMP27 PE=4 SV=2;Matrix metalloproteinase-27 OS=Bos mutus GN=M91_02021 PE=4 SV=1	18.8	19	0.005	7	0.11	0.02	0.35	0.03	0.314286	0.17	0.03	0.33	0.02	EMQAFFGLTVTGK+EPLNSSSDFTISEGK+GIADIMIAFKTR+GIADIMIAFKTRVHGSCPR+IDAAVCDRSTR+ILVFKDDNFWVIR+IREMQAFFGLTVTGK+IVNYTPDMAR+LDSNTLEIMKTPR
891	tr|A5PJL2|A5PJL2_BOVIN tr|M0QSP7|M0QSP7_9CETA	1	KCNJ15 protein OS=Bos taurus GN=KCNJ15 PE=2 SV=1;ATP-sensitive inward rectifier potassium channel 15 (Fragment) OS=Bos mutus GN=M91_21193 PE=3 SV=1	25.1	9	0.003	4	0.21	0.02	0.24	0.04	0.875	0.23	0.09	0.24	0.06	ASRPRVMSKSGHSNVR+EFELVVLLNATVESTSAVCQSR+HTAGAGLKASRPR+IARPKKR+KSLLIQCQLSGK+LCLVIQVANMR+MDPIHISMASAPLVK
892	tr|A5PJL4|A5PJL4_BOVIN tr|F1MZW8|F1MZW8_BOVIN tr|L8IFH5|L8IFH5_9CETA	1	Ribosomal protein S6 kinase OS=Bos taurus GN=RPS6KA3 PE=2 SV=1;Ribosomal protein S6 kinase OS=Bos taurus GN=RPS6KA3 PE=3 SV=1;Ribosomal protein S6 kinase alpha-3 (Fragment) OS=Bos mutus GN=M91_10671 PE=4 SV=1	24.6	11	0.004	4	0.21	0.06	0.25	0.05	0.84	0.22	0.05	0.26	0.04	ATNMEFAVKIIDKSK+DLKPSNILYVDESGNPESIR+DRKETMTMILK+DVYDDGK+EVMFTEEDVK+GGELLDKILR+ICDFGFAKQLR+IIDKSKR+ISGSDARQLYAMK+KETMTMILK+KISGSDAR+KISGSDARQLYAMK+LGAGPDGVEEIKR+LYAMKVLK+LYLILDFLR+NPANRLGAGPDGVEEIKR+NQSPVLEPVGR+TPKDSPGIPPSANAHQLFR+TVEYLHAQGVVHR+VFLVKKISGSDAR
893	tr|A5PJP0|A5PJP0_BOVIN tr|L8HVQ7|L8HVQ7_9CETA	1	TBC1D22B protein OS=Bos taurus GN=TBC1D22B PE=2 SV=1;TBC1 domain family member 22B OS=Bos mutus GN=M91_08142 PE=4 SV=1	20.8	12	0.002	3	0.12	0.03	0.35	0.05	0.342857	0.2	0.05	0.3	0.03	EVRPVTWRLLSGYLPANTERR+IDEQVHNHFRR+KASSFHEFAR+LKYMFADAPNHYR+LLSGYLPANTER+NKKASSFHEFAR+NSSDSCLR+NSSDSCLRNPLHK+QQSLPLRPVIPLVAR+SKVSTVPLKNK+YEVEYLQFAFR
894	tr|A5PJQ8|A5PJQ8_BOVIN tr|L8I9K5|L8I9K5_9CETA	1	ELF3 protein OS=Bos taurus GN=ELF3 PE=2 SV=1;ETS-related transcription factor Elf-3 OS=Bos mutus GN=M91_08616 PE=3 SV=1	23.7	12	0.003	6	0.17	0.02	0.34	0.03	0.5	0.19	0.02	0.28	0.03	DILIHPELNEGLMK+FLRSEAVAQLWGQK+KSKHAPR+LSKESRECLEGK+LVYKFGR+NSSGWKEEEVVGHR+NSSMTYEKLSR+NSSMTYEKLSRAMR+QEGVFKFLR
895	tr|A5PJQ9|A5PJQ9_BOVIN tr|F1MTL5|F1MTL5_BOVIN	1	Phosphatidylinositol 3-kinase OS=Bos taurus GN=PIK3C3 PE=2 SV=1;Phosphatidylinositol 3-kinase OS=Bos taurus GN=PIK3C3 PE=3 SV=2	23.3	14	0.005	3	0.21	0.03	0.3	0.04	0.7	0.16	0.05	0.29	0.04	AFSTRWNWNEWLK+CVKCDDKEYGIVYYEK+DPKPLPPPMK+DPKPLPPPMKLNK+DQLNIIVSYPPTK+EMVEGMGGTQSEQYQEFR+EMVEGMGGTQSEQYQEFRK+LARSLRSGPSDHDLKPNAATR+LNKEMVEGMGGTQSEQYQEFR+LPVKYPDLPR+LTFREIEMINESEKR+LTKAHRQGHMVK+LVHLMKAVQR+QDQLILQIISLMDK+QDQLILQIISLMDKLLR+QGHMVKVDWLDRLTFR+RSSNFMYLMVEFR+SGPSDHDLKPNAATR+THEMYLNVMRRFSQALLK+TSSTLSEDQMSR
896	tr|A5PJT3|A5PJT3_BOVIN tr|L8HQ95|L8HQ95_9CETA	1	MGC151858 protein OS=Bos taurus GN=MGC151858 PE=2 SV=1;Uncharacterized protein OS=Bos mutus GN=M91_03276 PE=4 SV=1	11.4	9	0.003	5	0.19	0.02	0.36	0.02	0.527778	0.16	0.02	0.28	0.03	GAGSGAGAPGR+LDLMTPYLNTSNR+LDLMTPYLNTSNREVKVR+LGDEVIMEVSCQDCYLR+LNPDFNDAK+MGFRDEAAGYFHK+MPNSRPRPR+MPNSRPRPRRGAGSGAGAPGR+NTIYNAAIQK+NTIYNAAIQKAVCSGSK+RNTIYNAAIQK
897	tr|A5PJT5|A5PJT5_BOVIN tr|L8HQ86|L8HQ86_9CETA	1	POGK protein OS=Bos taurus GN=POGK PE=2 SV=1;Pogo transposable element with KRAB domain OS=Bos mutus GN=M91_13681 PE=4 SV=1	18.4	7	0.002	3	0.14	0.01	0.4	0.03	0.35	0.2	0.02	0.24	0.06	ASLGWCRR+EAMQLKALEIAQEMNIPEK+EEESQNSDEWQLQGGTFAEK+ITAMLGVLADGR+KVKPQLQNAHAMR+LMVVEYAESTNNCQAAKQFGVLEKNVR+LVTYQRSVLALR+VKPQLQNAHAMRR
898	tr|A5PJT7|A5PJT7_BOVIN	1	ECM1 protein OS=Bos taurus GN=ECM1 PE=2 SV=1	17	7	0.002	4	0.18	0.05	0.38	0.04	0.473684	0.16	0.03	0.23	0.05	DKCFARR+NICHLKR+NICHLKRFR+NLPATDSIQRQLQALTRLEAEFQR+NRTNRLDCAELVWEDSVTR+THHHSCCNYPPSPLR+THHHSCCNYPPSPLRDK+TQPHGCCKKQGEAR
899	tr|A5PJT9|A5PJT9_BOVIN tr|L8IRC9|L8IRC9_9CETA	1	LYG2 protein OS=Bos taurus GN=LYG2 PE=2 SV=1;Lysozyme g-like protein 2 OS=Bos mutus GN=M91_16735 PE=4 SV=1	16	10	0.003	4	0.22	0.03	0.29	0.02	0.758621	0.21	0.02	0.26	0.04	GSEMFAEMDLK+GSHSFTHTMSPRLHFR+MIACGIRGSEMFAEMDLK
900	tr|A5PJU2|A5PJU2_BOVIN	1	MMRN1 protein OS=Bos taurus GN=MMRN1 PE=2 SV=1	27.8	26	0.005	6	0.2	0.01	0.29	0.04	0.689655	0.23	0.03	0.25	0.04	AESVILSNSTLKFLQSFAR+CCPGFSGPK+DGFKVQIK+DSLPNIQLLQTSLAEYVESVIEIK+IDNISLAVSDVR+INNLTLALEMEK+INNLTLALEMEKESVR+ISKMFNETSSQVIKFQQNISHLEEK+IVTSLEWK+KTNEQGISPNSVGGVGNR+MQHKIVTSLEWKCCPGFSGPK+MTDQMNYQAVK+NEVQSRGDALERR+NVETRLQGIESKVTK+QAESHAAVGR+QEMTLMCEKPVK+QEMTLMCEKPVKELEAK+QEMTLMCEKPVKELEAKQTR+QGLMLLQISDDLHAQDSK+QTLTLTEKTEEGMLK+SFLKGLKSK+TNEQGISPNSVGGVGNR+TNEQGISPNSVGGVGNRSPR+TSFICACR+TSKQKPSFETTR+TVSTV…
901	tr|A5PJX8|A5PJX8_BOVIN tr|L8I1T2|L8I1T2_9CETA	1	TRMT61B protein (Fragment) OS=Bos taurus GN=TRMT61B PE=2 SV=1;Putative tRNA (Adenine-N(1)-)-methyltransferase catalytic subunit TRMT61B (Fragment) OS=Bos mutus GN=M91_15061 PE=4 SV=1	31.9	15	0.004	6	0.13	0.02	0.36	0.05	0.361111	0.15	0.03	0.31	0.03	APGADSPPSVPSRVRGLGTR+ARIVMLSTRCVGLVLLPLR+ASPRDTGNEERESEAAQR+DHHKLAMK+DHHKLAMKNYR+DTGNEERESEAAQR+ESFERGR+FPGQILRSSSGKHFMLR+ICELALSCEKISEVIVR+INTDLQAHSQEKIR+LLQRFPGFR+QKNGILAQKVEPK+TCLFLRR+TCLFLRRLGR
902	tr|A5PJZ4|A5PJZ4_BOVIN tr|F1MJS5|F1MJS5_BOVIN tr|L8IPJ1|L8IPJ1_9CETA	1	HECTD3 protein OS=Bos taurus GN=HECTD3 PE=2 SV=1;Uncharacterized protein OS=Bos taurus GN=HECTD3 PE=4 SV=1;E3 ubiquitin-protein ligase HECTD3 OS=Bos mutus GN=M91_21611 PE=4 SV=1	27.6	27	0.007	9	0.13	0.01	0.32	0.01	0.40625	0.2	0.02	0.33	0.01	DFAKYEWIGQLMGAALR+DFPAVDSVLVK+DPAGPSRVLLPVWEAEGLGLR+DSIELRR+EQVAAMQAGLLK+EQVAAMQAGLLKVVPQAVLDLLTWQELEKK+EVLYKLYKDPAGPSR+KVCGDPEVTVDALR+LAMEHRACPLR+LLEVMEGMDK+LLEVMEGMDKETFEFKFGK+LTMKKGTIVK+NAVFTQVYEGLKPSDK+QLSGEEVSWSK+QRPGLVAQCLR+RLAMEHR+RLAMEHRACPLR+TANQGNGTGEAR+VGATGPAPGTGSGALR+VGATGPAPGTGSGALRAAR+VLLPVWEAEGLGLR+VQYFWEALNNFTNEDRSRFLR
903	tr|A5PK05|A5PK05_BOVIN tr|L8IG52|L8IG52_9CETA	1	LRRN2 protein OS=Bos taurus GN=LRRN2 PE=2 SV=1;Leucine-rich repeat neuronal protein 2 OS=Bos mutus GN=M91_12899 PE=4 SV=1	16.9	15	0.004	5	0.19	0.02	0.28	0.06	0.678571	0.15	0.04	0.32	0.02	ALAEPEPEIYWVTPAGVRLTAAWAGR+LDITNNPR+LPRGTHSYNITR+LPVREVAFR+LSFIHPR+LSFIHPRAFR+LTAAWAGRKYR+TVSVVVGRAPLQRGR+VGPGDFANMLHLK+VVSAPLVLHWNPGR+WANATSTRVR
904	tr|A5PK06|A5PK06_BOVIN	1	ICK protein OS=Bos taurus GN=ICK PE=2 SV=1	19.4	8	0.003	1	0.17	99.99	0.43	99.99	0.395349	0.13	99.99	0.27	99.99	LNHANVVKLKEVIR+NKLFPESAIR+QHYLKHSRYLPGINIR+QLGDGTYGSVLLGR+SAAKQHYLKHSR+SSGTVSVISKITSVGSSSTSSSGLAGNYIPSFLKK+TLIPNASSEAVQLLR+WGLVSRSTK+YTTIKQLGDGTYGSVLLGR
905	tr|A5PK11|A5PK11_BOVIN tr|F1N093|F1N093_BOVIN tr|L8HSW0|L8HSW0_9CETA	1	EHMT1 protein OS=Bos taurus GN=EHMT1 PE=2 SV=1;Uncharacterized protein (Fragment) OS=Bos taurus GN=EHMT1 PE=4 SV=2;Histone-lysine N-methyltransferase, H3 lysine-9 specific 5 (Fragment) OS=Bos mutus GN=M91_00220 PE=4 SV=1	26.5	37	0.007	6	0.21	0.02	0.33	0.01	0.636364	0.15	0.02	0.3	0.01	ADTTSTVTLAPGQEKSCAAEGR+APLLVLCEDHRGR+APLSEPPLRVASALASSLPGHAAK+ASKDGVLAPDCSQK+DAAPDRPTPVEK+DAAPDRPTPVEKTVSR+EELSRGASEFAR+EELSRGASEFARQQLSPPFPSLHQSLPQNQCYVATAK+FINHHCEPNLVPVR+FYGNVSRFINHHCEPNLVPVR+LLLSKGSDINIR+LQLYRTQNMGWGVR+NRVVQNGLR+NRVVQNGLRAR+QGELQKVLLMLVDGIDPNFKMEHQNK+RMGTYSLVPK+SIPGLHAASKDPR+SITHSTGGSK+TLPGGAGKGR+TMPKSIPGLHAASKDPR+TPLMEAAENNHLDAVKYLIK+TVIEMFK+TVIEMFKSITHSTGGSK+TVIEMFKSITHSTGG…
906	tr|A5PK17|A5PK17_BOVIN	1	EVI5L protein OS=Bos taurus GN=EVI5L PE=2 SV=1	29	23	0.005	3	0.26	0.09	0.31	0.06	0.83871	0.18	0.01	0.21	0.03	DSLGQEVLFNVMK+EADSMAAVAEMRQR+EADSMAAVAEMRQRIAELEIQR+EAQALAEGRELR+EGEAVASAR+EKLLKELIR+EMEEQIEIKRLR+ESPRKLVLGELQDELMSVR+EYAAMKSKEMEEQIEIK+GGRWKESPR+IANEWEEWR+LLKELIRK+LQEELKALKVR+LREADSMAAVAEMR+LREADSMAAVAEMRQR+LREAQALAEGRELR+LRETETLGALR+LRETETLGALREMQDK+LRTENRLLK+LVLGELQDELMSVRLR+NLLNRVEAER+NQYSELLK+NQYSELLKMSSPCEKLIR+QAEAECKSKEEVMAVR+QLQEQQDNPR+QRIAELEIQREEGR+VLDMEKRNNSLPDENNVAR
907	tr|A5PK42|A5PK42_BOVIN tr|L8IFL9|L8IFL9_9CETA	1	TTC25 protein OS=Bos taurus GN=TTC25 PE=2 SV=1;Tetratricopeptide repeat protein 25 OS=Bos mutus GN=M91_17155 PE=4 SV=1	29.6	21	0.006	8	0.18	0.01	0.32	0.02	0.5625	0.18	0.02	0.3	0.02	ALDNIGRVFAR+ASWRKELGAK+ENATMLDGQTR+EYDLPDAKSRALDNIGR+GILQKAETLYTMGDFEFALVFYHR+GPGDTAKGQFGEAGR+GSLKSEKIVR+IVRQLLGELYVDKEYLEK+LRDFESAVNNFEKALER+LSKTDGGELEALGK+LYLCGEFAK+QAESMRAQQKPHPVR+QLEGVLSKETLGVTAR+QLEGVLSKETLGVTARQPEQR+SKCFLKMGELEK+SRALDNIGRVFAR+TNYREILK
908	tr|A5PKE5|A5PKE5_BOVIN tr|E1BBL9|E1BBL9_BOVIN tr|L8HRR9|L8HRR9_9CETA	1	ADCY4 protein OS=Bos taurus GN=ADCY4 PE=2 SV=1;Uncharacterized protein OS=Bos taurus GN=ADCY4 PE=3 SV=2;Adenylate cyclase type 4 OS=Bos mutus GN=M91_13221 PE=3 SV=1	11.7	5	0.002	2	0.26	0.12	0.13	0.13	2	0.16	0.06	0.36	0.06	AATGVDINMR+FDQIAKEHECMR+KLRAATGVDINMR+LDTEKKHQEHLLLSILPAYLAR+LLLENVLPAHVAPQFIGQNRR+LRQEQEETETMENLTR+MESTGVLGK+QEQEETETMENLTR+VGLNHGPVVAGVIGAQKPQYDIWGNTVNVASR
909	tr|A5PKI9|A5PKI9_BOVIN tr|A8KC69|A8KC69_BOVIN tr|E2J1D3|E2J1D3_BOVIN tr|F1MFA9|F1MFA9_BOVIN	1	MCPH1 protein OS=Bos taurus GN=MCPH1 PE=2 SV=1;MCPH1 protein (Fragment) OS=Bos taurus GN=MCPH1 PE=2 SV=1;Microcephalin (Fragment) OS=Bos taurus GN=Mcph1 PE=2 SV=1;Uncharacterized protein OS=Bos taurus GN=MCPH1 PE=4 SV=2	36	17	0.003	5	0.16	0.02	0.28	0.02	0.571429	0.18	0.03	0.36	0.03	AEAQGGGDVRPAGGDAPQTR+EGAPPETTESAAVHSEGKPSAAGGYAEDRPAGAR+EQHMGSSAKR+GAPAHGSSGSVKSGPTR+KGCQDLLRLR+LREESGK+LSPVSSATKGRPGGR+LWKAERGLR+QASIFIGPSPGR+RLSPVSSATKGRPGGR+RTLSVLLGIAR+SGPTRHSVVASSR+SLGQRPAPR+STSSPPKAETPQQSRAAR+TSLLDRADLSLIGR+TSLLDRADLSLIGRSPR+VSEGLLGEQLPSRPPALHCQR
910	tr|A5PKJ1|A5PKJ1_BOVIN tr|F1MTH1|F1MTH1_BOVIN tr|L8HL58|L8HL58_9CETA	1	DET1 protein OS=Bos taurus GN=DET1 PE=2 SV=1;Uncharacterized protein OS=Bos taurus GN=DET1 PE=4 SV=1;DET1-like protein (Fragment) OS=Bos mutus GN=M91_11608 PE=4 SV=1	13.5	7	0.003	5	0.17	0.04	0.25	0.05	0.68	0.18	0.02	0.34	0.04	AEQDGSAMAKR+DSQTGMANPFRDPFINSLKHR+DTIVNAKYGGHTEAVRR+ISSGKAGTHWHQVR+LLVYLWRRAEQDGSAMAK+RAEQDGSAMAK+RFKDTIVNAK
911	tr|A5PKJ3|A5PKJ3_BOVIN tr|F1MIC9|F1MIC9_BOVIN	1	DCTN1 protein OS=Bos taurus GN=DCTN1 PE=2 SV=1;Uncharacterized protein OS=Bos taurus GN=DCTN1 PE=4 SV=1	27.3	24	0.006	8	0.17	0.02	0.3	0.02	0.566667	0.19	0.01	0.31	0.03	AFLQGGQEASDIALLLR+DLEEKLETLR+DLETSCSDTRQFCK+DLSSSEKQEHVKLQK+DQLDETVNVEPLTK+DSPLLLQQISAMR+EMAEERAESLQQEAEVLR+EQLDMAGAQVR+EQLDMAGAQVRDAQK+ETELELREQLDMAGAQVRDAQK+GAQMKASLAALPPLHVAK+GSDGAASSYQLKQLEEQNARLK+IKGEELSEANVR+IQLEQVQEWKSK+KVGSLYPEMSAHERSLDFLIELLHK+KYRQLTAHLQDVNR+LATAMQEGEYDAERPPSKPPPVELR+LKETVGDLEAINEMNDELQENAR+LNSQSKRTIEGLR+NDGTVQGR+NDGTVQGRK+RAEDKAK+TNQLLETLNQLSACTHVVDITR+VQTRLEETQTLLR
912	tr|A5PKJ5|A5PKJ5_BOVIN	1	UNC45A protein OS=Bos taurus GN=UNC45A PE=2 SV=1	29.5	21	0.008	12	0.17	0.01	0.28	0.02	0.607143	0.18	0.02	0.34	0.02	AETEATKAIEKDGGDIK+ALFQLSKSEER+ASFITANGVSLLK+ASQNLVVLAREDAGAEKIFR+DEETPVTR+DGGDIKALYR+DKPSFVRAR+DLYKRSEK+DNALTLLIK+DNALTLLIKVVPR+EDAGAEKIFR+EIASTLMESEVLEILSVLAK+IFRSNGVQLLQRLLDTGEPDLMLAALR+KLLAAGVVSAMTCMVK+KQKASQNLVVLAR+LGSAGGTDFSMK+LTITSNPEMTFPGER+NIAGQIQEKVR+QKASQNLVVLAR+QKASQNLVVLAREDAGAEK+RAAAGGLAMLTSMRPSLCSR+SNGVQLLQRLLDTGEPDLMLAALR+SWFEGHGLAGK+TESPVLTSSCR+TVATLSVLGTRR+VEQMFQILLDPQEK+VKKLLAAG…
913	tr|A6H701|A6H701_BOVIN	1	LRRTM2 protein OS=Bos taurus GN=LRRTM2 PE=2 SV=1	26.7	25	0.007	13	0.19	0.01	0.29	0.01	0.655172	0.21	0.01	0.3	0.01	ELHLEHNQLTKINFAHFLR+GSLGLSLR+ICALASWLGSFQGR+ILLMDNNK+ILLMDNNKLNSLDSKILNSLR+ISSSSYHVGDK+LDLTGNEIK+LFWDCRSLEFLDLSTNR+LNSLDSKILNSLR+MLPALGMACPPKCR+QCSMIQNHR+SLARNGFAGLIKLR+SLEFLDLSTNRLR
914	tr|A6H717|A6H717_BOVIN tr|F1MGD1|F1MGD1_BOVIN	1	RNF135 protein OS=Bos taurus GN=RNF135 PE=2 SV=1;Uncharacterized protein OS=Bos taurus GN=RNF135 PE=4 SV=1	17	7	0.002	3	0.15	0.04	0.29	0.04	0.517241	0.22	0.05	0.3	0.03	DCLLDLWAAR+DCLLDLWAARR+ELEPLSPGPEPTPAPRPASRPGRPTAQLR+GMKRDQILGR+LVERLIDIVR+NTMLEDLADKYR
915	tr|A6H720|A6H720_BOVIN tr|L8IX09|L8IX09_9CETA	1	NCK2 protein OS=Bos taurus GN=NCK2 PE=2 SV=1;Cytoplasmic protein NCK2 OS=Bos mutus GN=M91_19265 PE=4 SV=1	24.5	8	0.002	3	0.15	0.01	0.29	0.01	0.517241	0.15	0	0.41	0.02	DSESSPSDFSVSLK+DSESSPSDFSVSLKASGK+DSESSPSDFSVSLKASGKNK+GSLVKNIKDTLGLGR+GSRVTVMEK+GVQGDFLVR+NARGQVGLVPK+NIKDTLGLGR+NIKDTLGLGRTR+NYVVVLSEGPAPHAGSGPAGPARAGR
916	tr|A6H722|A6H722_BOVIN	1	CYP39A1 protein OS=Bos taurus GN=CYP39A1 PE=2 SV=1	25.2	9	0.003	3	0.15	0.03	0.32	0	0.46875	0.21	0.01	0.31	0.02	ARIKYGPVFTVIVMGTR+FMRHLLYPVTVNILFKK+IQFKQRK+LHEKLYITVK+LRAPGVIAR+QSSLHLVGVQQPEGRCRIQFK+TIMEGISSVFGTAGKDKIK+WKEANLEKHAFLDCFMAFGSGK
917	tr|A6H725|A6H725_BOVIN	1	LOC788925 protein OS=Bos taurus GN=LOC788925 PE=2 SV=1	13.6	15	0.004	6	0.16	0.02	0.34	0.04	0.470588	0.14	0.03	0.33	0.02	GGGSGTSEFDGAGGR+GGGSGTSEFDGAGGRQSVV+LEDALARAHAR+NTITLGVK+NTITLGVKLEDALAR+NTITLGVKLEDALARAHAR+SGDVLAKNPVVR+SRSGDVLAKNPVVR
918	tr|A6H761|A6H761_BOVIN tr|F1MHQ5|F1MHQ5_BOVIN tr|L8IQE5|L8IQE5_9CETA	1	mRNA cap guanine-N7 methyltransferase OS=Bos taurus GN=RNMT PE=2 SV=1;mRNA cap guanine-N7 methyltransferase OS=Bos taurus GN=RNMT PE=3 SV=1;mRNA cap guanine-N7 methyltransferase OS=Bos mutus GN=M91_15558 PE=3 SV=1	23.1	12	0.003	3	0.2	0.02	0.3	0.03	0.666667	0.16	0.04	0.32	0.02	DEPAGDGTQKR+GSGDDEGISR+GSGDDEGISRR+GSGDDEGISRRR+IDKLVCTDIADVSVR+IETDGFPKDEPAGDGTQKR+IKNNENKMLLK+LSPGGYFIGTTPNSFELIRR+LVCTDIADVSVR+NNENKMLLKR+SQSRIFYLRNFNNWMK+YMKNSQVKLPLGTLSK
919	tr|A6H781|A6H781_BOVIN tr|F1MAT9|F1MAT9_BOVIN tr|L8IRZ9|L8IRZ9_9CETA	1	LOC618190 protein OS=Bos taurus GN=LOC618190 PE=2 SV=1;Uncharacterized protein OS=Bos taurus GN=KANSL3 PE=4 SV=2;Uncharacterized protein (Fragment) OS=Bos mutus GN=M91_04590 PE=4 SV=1	20.3	12	0.003	3	0.18	0.04	0.36	0.08	0.5	0.2	0.01	0.21	0.09	DQDAEKKK+GGERDFQTSARR+IRAENSLVVVGGADDNLR+KKSEGLTQSMVDR+KSEGLTQSMVDR+LPGSPLILIASSGPSSSVFPTSRRHR+MAHRGGERDFQTSAR+MLVSSNTK+RMGTSLLFQLSVHER+SEGLTQSMVDR+TEGHVGSEPR+TGWTLAQNK
920	tr|A6H798|A6H798_BOVIN tr|L8IY81|L8IY81_9CETA	1	LOC616153 protein OS=Bos taurus GN=LOC616153 PE=2 SV=1;Protein FAM71A OS=Bos mutus GN=M91_19069 PE=4 SV=1	25.2	15	0.005	6	0.18	0.04	0.3	0.02	0.6	0.18	0.03	0.3	0.03	AAKTLELTRLLPLK+FVRISIHDR+GHGSPGDSK+GPEGNKSNIAMGGAAKTSLR+GTVHKGVSHAPITKESR+HKTVGDKAIR+ISSFLRNVR+ISSFLRNVRANLTTK+LQRQLHK+LSRISSFLR+NVRANLTTK+RGEVIDVHNRVR+SNIAMGGAAKTSLRTR+SPTAMDFQGRGDQDQVSVR+TAGRSSGGRR+TVGDKAIR
921	tr|A6H7B7|A6H7B7_BOVIN tr|L8HXU1|L8HXU1_9CETA	1	SFRS5 protein OS=Bos taurus GN=SFRS5 PE=2 SV=1;Serine/arginine-rich splicing factor 5 OS=Bos mutus GN=M91_10596 PE=4 SV=1	29.4	22	0.005	9	0.19	0.01	0.28	0.01	0.678571	0.21	0.01	0.31	0.01	DIDLKRGFGFVEFEDPR+GSSSRSKSPASVDR+LNEGVVEFASYGDLKNAIEK+LNPAAREKDVER+LSGKEINGR+NAIEKLSGK+NAIEKLSGKEINGR+SRTRSSSR
922	tr|A6H7C1|A6H7C1_BOVIN tr|L8IJD9|L8IJD9_9CETA	1	MORF4L2 protein OS=Bos taurus GN=MORF4L2 PE=2 SV=1;Mortality factor 4-like protein 2 OS=Bos mutus GN=M91_00868 PE=4 SV=1	28.6	16	0.004	4	0.2	0.01	0.27	0.04	0.740741	0.21	0.02	0.29	0.05	IPEELKPWLVEDWDLVTR+KTAGPQQKNLEAALPGR+NLEAALPGR+NLEAALPGRWGGR+NRMEVKVK+NVDTILEEYANCK+SAENPPSGSVRKTR+SQGNVDNK+TAGPQQKNLEAALPGR+TAGPQQKNLEAALPGRWGGR
923	tr|A6H7D7|A6H7D7_BOVIN tr|L8IG83|L8IG83_9CETA	1	BZW2 protein OS=Bos taurus GN=BZW2 PE=2 SV=1;Basic leucine zipper and W2 domain-containing protein 2 (Fragment) OS=Bos mutus GN=M91_02493 PE=4 SV=1	19.8	6	0.002	3	0.18	0.01	0.26	0.03	0.692308	0.22	0.06	0.32	0.04	DANSVTSSLR+DANSVTSSLRK+LLELFPVNR+QSVDHFAKYFTDAGLK+TKMTNHCVFSANEDHETIR+VQEYCYDNIHFMKAFQK+YLEKAFEDEMK
924	tr|A6H7G1|A6H7G1_BOVIN tr|L8IQL1|L8IQL1_9CETA	1	KLHL28 protein OS=Bos taurus GN=KLHL28 PE=2 SV=1;Kelch-like protein 28 OS=Bos mutus GN=M91_01162 PE=4 SV=1	15.1	10	0.004	5	0.14	0.01	0.3	0.02	0.466667	0.15	0.03	0.39	0.02	FLTRLYEANHLIRDDR+KWQPVAPMTTTR+LYEANHLIRDDR+QHHELCDIILR+QHHELCDIILRVGDVKIHAHK+QKYLAQLLNSVRLPLLSVK+VGDVKIHAHK+YDPSKDSWEMVASMADKR+YLAQLLNSVR
925	tr|A6H7G6|A6H7G6_BOVIN tr|F6R9X6|F6R9X6_BOVIN tr|L8IZP2|L8IZP2_9CETA	1	ACTR6 protein OS=Bos taurus GN=ACTR6 PE=2 SV=1;Uncharacterized protein OS=Bos taurus GN=ACTR6 PE=3 SV=1;Actin-related protein 6 OS=Bos mutus GN=M91_00431 PE=3 SV=1	17.9	9	0.003	4	0.16	0.01	0.29	0.02	0.551724	0.22	0.01	0.33	0.02	DMDIAKLK+DRVYSEVR+EDVCYVSQDFYRDMDIAKLK+EEMVLSGK+INVGGKLLTNHLK+KGFCKPREEMVLSGK+NIVLTGGNSLFPGFRDR
926	tr|A6H7G7|A6H7G7_BOVIN tr|F1MD85|F1MD85_BOVIN tr|L8IYM2|L8IYM2_9CETA	1	GPR19 protein OS=Bos taurus GN=GPR19 PE=2 SV=1;Uncharacterized protein OS=Bos taurus GN=GPR19 PE=4 SV=1;Putative G-protein coupled receptor 19 OS=Bos mutus GN=M91_15892 PE=4 SV=1	16.6	5	0.002	2	0.15	0.06	0.23	0.08	0.652174	0.26	0.01	0.34	0.04	DLTELSPEHSWR+DLTELSPEHSWRSNR+ETFCMSSMKCYR+ETFCMSSMKCYRSNAYTITTSSR+IGTDGRTVRR+TMNIVPRTK+WTLGSAMCRAVR
927	tr|A6H7G9|A6H7G9_BOVIN tr|A6QPN0|A6QPN0_BOVIN tr|F1MF15|F1MF15_BOVIN tr|L8HMZ3|L8HMZ3_9CETA	1	GABBR1 protein OS=Bos taurus GN=GABBR1 PE=2 SV=1;GABBR1 protein OS=Bos taurus GN=GABBR1 PE=2 SV=1;Uncharacterized protein OS=Bos taurus GN=GABBR1 PE=4 SV=1;Gamma-aminobutyric acid type B receptor subunit 1 (Fragment) OS=Bos mutus GN=M91_05122 PE=4 SV=1	12.8	12	0.004	5	0.21	0.06	0.23	0.02	0.913043	0.19	0.03	0.31	0.05	IILMPGCSSVSTLVAEAAR+MWNLIVLSYGSSSPALSNRQR+QSFFSDPAVPVK+SVSTEKINDHR+TGSSTNNNEEEK+TGSSTNNNEEEKSR+TIETFAKEEPK+TSGGGGRSGVR+VSELRHQLQSR
928	tr|A6H7J3|A6H7J3_BOVIN	1	GAN protein OS=Bos taurus GN=GAN PE=2 SV=1	31	13	0.005	4	0.09	0.02	0.26	0.02	0.346154	0.19	0.05	0.41	0.07	CMCPLYDPNR+IELEGISVMVMR+KIYAMGGGSYGK+KPTAAMRCMCPLYDPNRQLWIELAPLSMPR+LFESVECYDPR+LFRLQLQQGLFRIR+LNEDTIQDVVQAADLLLLTDLK+MAEGSAVSDPQHATRLLR+NILAAASPYIR+QLWIELAPLSMPR+TGCAALRIANCKLFR+TQQWTAICPLKER+TWTKQPDLTMVR+YDPDANMWTALPPMNEAR
929	tr|A6QL51|A6QL51_BOVIN tr|L8IY56|L8IY56_9CETA	1	SAMD14 protein OS=Bos taurus GN=SAMD14 PE=2 SV=1;Sterile alpha motif domain-containing protein 14 OS=Bos mutus GN=M91_15603 PE=4 SV=1	26	6	0.003	4	0.18	0.02	0.3	0.05	0.6	0.18	0.07	0.28	0.03	ESVEGSSR+GSASSGSTTSPSCSPK+GSASSGSTTSPSCSPKR+GTDGCGSPLHR+GTDGCGSPLHRLR+LKSLGLSNSHDR+LRSPLHSGPGSPAGGSFCLEPPGLR+LSMGSRESVEGSSR+RSLDEDEPPPSPLAR+SAASSDSSPSFVR+SAASSDSSPSFVRR
930	tr|A6QL80|A6QL80_BOVIN	1	PRMT3 protein OS=Bos taurus GN=PRMT3 PE=2 SV=1	24.1	8	0.002	2	0.19	0.01	0.29	0.04	0.655172	0.17	0.01	0.34	0.04	AGAKKVLGVDQSEILYQAMDIIR+ALSAEAALAGAREDLQKMK+DFIYQNPHIFK+KVLGVDQSEILYQAMDIIR+MKQFAQDFVMNADVR+NCHNKVVFSTGPLSTK+NKYLAKGGSVYPDICTISLVAVSDMNK+QFAQDFVMNADVR+SLIVALTLNNTTQTYGLQ+VLGVDQSEILYQAMDIIR
931	tr|A6QL81|A6QL81_BOVIN tr|L8J179|L8J179_9CETA	1	DKK3 protein OS=Bos taurus GN=DKK3 PE=2 SV=1;Dickkopf-related protein 3 (Fragment) OS=Bos mutus GN=M91_01352 PE=4 SV=1	22.1	4	0.002	1	0.48	99.99	0.12	99.99	4	0.13	99.99	0.28	99.99	EIHKITNNRTGQMVFSETVITSMGDEEGK+LLDLITWELEPDGALDR+LRSAVEEMEAEEAAAK+YCQFSSFEYSCQPCR
932	tr|A6QL95|A6QL95_BOVIN tr|F1MJ36|F1MJ36_BOVIN tr|L8IH13|L8IH13_9CETA	1	Dolichyl-diphosphooligosaccharide--protein glycosyltransferase subunit 1 OS=Bos taurus GN=MGC152360 PE=2 SV=1;Dolichyl-diphosphooligosaccharide--protein glycosyltransferase subunit 1 OS=Bos taurus GN=LOC539818 PE=3 SV=1;Dolichyl-diphosphooligosaccharide--protein glycosyltransferase subunit 1 OS=Bos mutus GN=M91_20267 PE=3 SV=1	21.9	13	0.005	6	0.18	0.01	0.28	0.02	0.642857	0.19	0.02	0.33	0.03	ALTSEVALLQAR+DMYIQNKK+DMYIQNKKLISGK+DVSVLNSGK+DVSVLNSGKKSLEMEHK+GSFSRYDYDK+IEHILDTL+LDLSITKDPAAEAR+MRLVDHVFDKQVIDSLTVK+QSRDVSVLNSGKK+QVIDSLTVKIILPEGAR+RLGLYHHFNKTVNR+TEGSNLCDKVSEMQK
933	tr|A6QL98|A6QL98_BOVIN	1	APLNR protein OS=Bos taurus GN=APLNR PE=2 SV=1	26.2	25	0.005	7	0.18	0.02	0.32	0.01	0.5625	0.19	0.01	0.31	0.01	AGGGGGGGGGRGGGGGDK+DYDWPFGAFACK+GCGGAWRAGGGGGGGGGR+LSSYLIFVNMYASVFCLTGLSLDR+RGCGGAWRAGGGGGGGGGR+SASSSSSASSGHSQGPGPGGAGKGGEPMPEK+TVAGHFGKERAR
934	tr|A6QLB2|A6QLB2_BOVIN tr|L8IHY1|L8IHY1_9CETA	1	DDX23 protein OS=Bos taurus GN=DDX23 PE=2 SV=1;Putative ATP-dependent RNA helicase DDX23 OS=Bos mutus GN=M91_03094 PE=3 SV=1	33	33	0.008	10	0.16	0.02	0.28	0.02	0.571429	0.24	0.01	0.3	0.02	CGYKEPTPIQR+DASPSKEER+DIIGVAETGSGK+DRDASPSKEER+DSSLPPHILEVIDKCGYKEPTPIQR+EDYSITTKGGK+EFALSNLK+EFALSNLKAGAKDILVATDVAGR+EQEEARLR+EQEEARLRK+ETNGNEDEEGRQKIR+GGKIPNPIR+KPKAQPLSLEELLAK+LDEMTDRDWR+LDEMTDRDWRIFR+LRMGCEIVIATPGR+MERETNGNEDEEGR+MIDMGFEPDVQK+MLANFESGK+MLEDPQERERR+NIEDYIHRIGRTGR+QAIPIGLQNRDIIGVAETGSGK+QTVMFTATMPPAVER+QTVMFTATMPPAVERLAR+RSSLSPGRGK+SLEKMGYNACTLHGGKGQEQR+TRHLNDR+YRQTVMFTATMPPAVE…
935	tr|A6QLB5|A6QLB5_BOVIN tr|L8I0J2|L8I0J2_9CETA	1	EML3 protein OS=Bos taurus GN=EML3 PE=2 SV=1;Echinoderm microtubule-associated protein-like 3 (Fragment) OS=Bos mutus GN=M91_07627 PE=4 SV=1	19.6	42	0.012	20	0.17	0.01	0.32	0.02	0.53125	0.19	0.01	0.29	0.01	CVGHSSFITHLDWSK+DGTVLSGGGR+DGTVLSGGGRDR+DSSSIVTSGK+EMELVKAALAEALR+GRPITMYIPSGIR+LAQPPQR+LDWVYGYRGR+NRYESRDR+NSSSSSPSERPR+RSNYNLEGISVKMFLR+SHVHFWNWNGGTGVPGNGTLTRK+SNLFVLR+WLVLDTETREIVSDITDGNEQLSVVR
936	tr|A6QLC1|A6QLC1_BOVIN tr|L8HYE3|L8HYE3_9CETA	1	PADI1 protein OS=Bos taurus GN=PADI1 PE=2 SV=1;Protein-arginine deiminase type-1 OS=Bos mutus GN=M91_13155 PE=4 SV=1	18.4	16	0.004	4	0.12	0.01	0.38	0.01	0.315789	0.12	0.04	0.35	0.04	ASCKLMICPR+DAYAEAFFPDMVNMVVLGR+DFIGAQR+EYPLGRILIGSCLPRSGGR+IFMVYDPAR+IFMVYDPARVTEPTGR+ILIGSCLPRSGGR+KPFPFKWWHVVP+LLGEIHCGSNVRR+LVLNVPPSDSKR+MAQRSAVRLSPK+SQADKERWR
937	tr|A6QLD6|A6QLD6_BOVIN	1	MYO1B protein OS=Bos taurus GN=MYO1B PE=2 SV=1	23.2	19	0.005	4	0.22	0.02	0.3	0.02	0.733333	0.21	0.02	0.28	0.02	ANGKSTSRIFLLTNNNLLLADQK+ASVATLMK+DLSQAMWKAGHALIK+GDFLFSSDHLIEMATKLYR+GPARAGVEVLFNELEIPVEEYSFGR+HQKRCEEAVTTIAAYWHGTQAR+INLKRPPTAGSQFK+KAAHIFNEGLVCHQVR+KNNRLLEVAVP+NKHAIAVIWAYWLGSK+NNDLLYR+NPRTLFKLEDLR+TSLLDNMIGVGDMVLLEPLSEDTVIDNLK+TVEAKQEKVSTTLNVAQAYYAR+VPSLSPIDKNWPSRPYLFLDSTHK+VSTTLNVAQAYYAR
938	tr|A6QLF4|A6QLF4_BOVIN tr|L8HNU6|L8HNU6_9CETA	1	TRIB1 protein OS=Bos taurus GN=TRIB1 PE=2 SV=1;Tribbles-like protein 1 OS=Bos mutus GN=M91_16337 PE=4 SV=1	40.4	14	0.003	4	0.17	0.04	0.35	0.03	0.485714	0.15	0.03	0.31	0.02	AADVWSLGVMLYTLLVGR+DFGDMHSYVR+GTPAKRLLDADDAAAVAAK+IADYLLLPLAER+KFVFSTEERTQLR+LESLEDTHIIKGEDDALSDK+LFKQIVSAVAHCHQSAIVLGDLK+LLDADDAAAVAAK+LRSLLRR+QIVSAVAHCHQSAIVLGDLKLR+SAMNGVSQPR+SAMNGVSQPRTPALLLAAGR+TPALLLAAGR
939	tr|A6QLK9|A6QLK9_BOVIN tr|F6R7C3|F6R7C3_BOVIN tr|L8IBZ3|L8IBZ3_9CETA	1	PXMP3 protein OS=Bos taurus GN=PXMP3 PE=2 SV=1;Uncharacterized protein OS=Bos taurus GN=PEX2 PE=4 SV=1;Peroxisome biogenesis factor 2 OS=Bos mutus GN=M91_13470 PE=4 SV=1	15.7	16	0.006	11	0.16	0.01	0.31	0.01	0.516129	0.19	0.01	0.32	0.01	LGGLINFLIFLQR+LLGIHSVFHKPQSVREVGFEYMNR+SGIEMAEVSVP
940	tr|A6QLL4|A6QLL4_BOVIN tr|L8IKZ8|L8IKZ8_9CETA	1	DCLRE1C protein OS=Bos taurus GN=DCLRE1C PE=2 SV=1;Protein artemis OS=Bos mutus GN=M91_10664 PE=4 SV=1	21.1	10	0.003	3	0.14	0.03	0.25	0.04	0.56	0.26	0.04	0.32	0.04	ATTKKSILSDTSQNHNR+DAEGTDDCLENLPSSTEVGGSQSPK+DHMKGLR+DTQIHACR+EECLRGIMELVR+GEAARMELLHSGGR+GEAARMELLHSGGRVK+GIMELVRSWISR+IPLHTISIKPSTMWFGERTR+KSILSDTSQNHNR+LAKGEAAR+LAKGEAARMELLHSGGR+LATGESIVVEKR+LDMFRNMPDILHHLTTDR+SILSDTSQNHNR+TRKTNIIMR
941	tr|A6QLQ4|A6QLQ4_BOVIN tr|L8I1D9|L8I1D9_9CETA	1	LOC782821 protein OS=Bos taurus GN=LOC782821 PE=2 SV=1;Uncharacterized protein (Fragment) OS=Bos mutus GN=M91_01932 PE=4 SV=1	29.1	4	0.002	3	0.19	0	0.28	0.02	0.678571	0.3	0.03	0.23	0.03	DDNQNTFLK+GSNAENLHTSPTVK+GSSLPPANPNLGR+QMEEHLRQEQAR
942	tr|A6QLS3|A6QLS3_BOVIN tr|L8IWW9|L8IWW9_9CETA	1	CDKN1B protein OS=Bos taurus GN=CDKN1B PE=2 SV=1;Cyclin-dependent kinase inhibitor 1B OS=Bos mutus GN=M91_15891 PE=4 SV=1	41.4	3	0.001	1	0.19	99.99	0.3	99.99	0.633333	0.23	99.99	0.27	99.99	HCRDMEEASQR+KWNFDFKNHKPLEGK+MSNVRVSNGSPSLERMDAR+NLFGPVNHEELTR+RANRTEENVSDGSPNAGSVEQTPK
943	tr|A6QLT3|A6QLT3_BOVIN tr|L8IEP5|L8IEP5_9CETA	1	LOC520387 protein OS=Bos taurus GN=LOC520387 PE=2 SV=1;Uncharacterized protein OS=Bos mutus GN=M91_11815 PE=4 SV=1	18.7	9	0.003	4	0.25	0.06	0.27	0.06	0.925926	0.16	0.06	0.24	0.01	AHVAALGGNAVVSYIMK+DAWWAEIR+EEGGVSGFLHAFIAEVFAMVR+GSIKTTVTVEK+HLPVMDR+ITKYLGIINMFFIR+LISLMSGELQRK+LKAMNALFGLR+LKVKIVAGR+LLDRIHNPDEPETR+QSSCGVKFFCTTSIPK+SQSESSDEVTELDLSHGKK+SYSRQSSSSDTDLSLTPKTGMGSGSAGK+TTVTVEKASPMGEGNFR+VKIVAGRHLPVMDR
944	tr|A6QLV1|A6QLV1_BOVIN	1	UNC84B protein OS=Bos taurus GN=UNC84B PE=2 SV=1	18.5	12	0.003	2	0.29	0.01	0.2	0.01	1.45	0.25	0.02	0.26	0.01	DDVESQFPAWVSQFLLR+DLESRILTHVAEMQGKSAR+EAVASLGLTLQR+ESYIGSPR+GSIGQREVWESR+HSLLDDPYWSEDLRVR+IQEELVTLR+LEGQLAGLR+RRGTGGTDSSKPNGLPENK+VGSLLWMVVTSPGR
945	tr|A6QLW0|A6QLW0_BOVIN	1	BUB1 protein OS=Bos taurus GN=BUB1 PE=2 SV=1	13.4	12	0.004	7	0.16	0.01	0.32	0.02	0.5	0.24	0.02	0.27	0.01	ADVQQVVMYCKEK+ADVQQVVMYCKEKLIR+DDDLSNGLVLIDLGQSIDMK+EANALEEQLLK+EANALEEQLLKQKMDELHK+ENYGLPQLKNKPAGAR+ENYGLPQLKNKPAGARTFGER+EYLTTLLEHLMK+LFPKGTAFTGK+NQGPQLSGATPAAGDKGEQR+NTPEKVMPQALVLAFAIR+NVDEKPR
946	tr|A6QLW1|A6QLW1_BOVIN tr|L8IE82|L8IE82_9CETA	1	PIK3R4 protein OS=Bos taurus GN=PIK3R4 PE=2 SV=1;Phosphoinositide 3-kinase regulatory subunit 4 OS=Bos mutus GN=M91_03684 PE=4 SV=1	13.7	18	0.006	10	0.18	0.03	0.29	0.03	0.62069	0.15	0.02	0.32	0.03	AAEKASEKAAMLFR+AAMLFRQYVRDNLYDR+ASEKAAMLFR+DFMMKSNK+ETFLSADERILVIRK+GSDQEVVPAGKPPR+IAKQMMENAEWESKPPPPGWRPK+IHPLQSR+ITPYLLHFSNDSVPRVR+ITTCKTELQQLIQQKR+QKANDVLLSHMITFLNDKNDWHLR+RTCYIAPER+SLGSTRFFKVAR+TCYIAPER+TELQQLIQQK+TELQQLIQQKREQCNAER+TLTKVLALVK
947	tr|A6QLY3|A6QLY3_BOVIN tr|L8IFL8|L8IFL8_9CETA	1	LEPREL1 protein OS=Bos taurus GN=LEPREL1 PE=2 SV=1;Prolyl 3-hydroxylase 2 (Fragment) OS=Bos mutus GN=M91_00306 PE=4 SV=1	23.6	9	0.003	3	0.17	0.05	0.38	0.05	0.447368	0.18	0.04	0.23	0.07	ASEDVRSDFQR+CAVALWFTLDPLYRELER+CGRMISFSSGGENPHGVK+CYRSCQSQRLGGPASR+EDLAMFVKR+IQADEVIAILDQEQQGK+LFYDISEKAR+MISFSSGGENPHGVK+NDLSHPIHADNCLLDPEANECWK+SAAEGLGFSYTEPNYWIRYGGR+VGEYIKALECAK
948	tr|A6QM02|A6QM02_BOVIN tr|F1N6B6|F1N6B6_BOVIN tr|L8HSJ3|L8HSJ3_9CETA	1	NUP188 protein OS=Bos taurus GN=NUP188 PE=2 SV=1;Uncharacterized protein OS=Bos taurus GN=NUP188 PE=4 SV=2;Nucleoporin NUP188-like protein (Fragment) OS=Bos mutus GN=M91_13518 PE=4 SV=1	13.6	33	0.009	16	0.17	0.01	0.31	0.01	0.548387	0.18	0.01	0.34	0.01	DSAMLVLR+DSMETDDCSRLR+DVASPLKELGLR+ELWTILLGR+EMLPSYHKWRYNSHGVR+GSLDQSLKDTLK+IICLEIYYVVK+KIGGTAIQLNVFQYLTRLLR+LGSMTCTLLLILLR+LLYPLGGQTNLR+LPILPTLFTTLEVSLR+LQSKIEDMR+MKQELSSELSTLLSSLSR+QRMKQELSSELSTLLSSLSR+QTPKLLYPLGGQTNLR+SDGAEGQGQGQLLIKTVK+SLLMFTMENCFYLLISQAMR+YWCPPLLHRAAIAFLHALWQDR
949	tr|A6QNJ8|A6QNJ8_BOVIN tr|F1N6Y1|F1N6Y1_BOVIN tr|L8I0R2|L8I0R2_9CETA	1	GANAB protein (Fragment) OS=Bos taurus GN=GANAB PE=2 SV=1;Uncharacterized protein OS=Bos taurus GN=GANAB PE=1 SV=1;Neutral alpha-glucosidase AB (Fragment) OS=Bos mutus GN=M91_07630 PE=3 SV=1	19.7	14	0.004	2	0.14	0.05	0.25	0.01	0.56	0.3	0.02	0.3	0.02	DAQHYGGWEHR+GGTIVPRWMRVR+IILTARPFRLDLLEDRSLLLSVNAR+IKNVFSRQGSK+LDLLEDR+LKVTEGGEPYR+MALYGSVPVLLAHSPLR+NMTRIRIDELEPR+NPEPELLVR+NVFSRQGSK+SGGIERPFVLSR+TLFGKMLDYLQGSGETPQTDVR+VPDVLVADPPTAGLSVSGR+VTEGGEPYRLYNLDVFQYELYNR+VVLVLELQGLQKNMTR
950	tr|A6QNL4|A6QNL4_BOVIN tr|F1MTN2|F1MTN2_BOVIN tr|L8HNW3|L8HNW3_9CETA	1	Uncharacterized protein OS=Bos taurus GN=ZNF667 PE=2 SV=1;Uncharacterized protein (Fragment) OS=Bos taurus GN=ZNF667 PE=4 SV=1;Zinc finger protein 667 OS=Bos mutus GN=M91_17369 PE=4 SV=1	22.4	9	0.003	3	0.21	0.02	0.28	0.01	0.75	0.2	0.01	0.3	0.01	EKLYQCNK+IHNSEKPHKCNKCEK+ISSIMLHQR+NSVLIKR+SLKCNDCGKFFSQSLSLK+TCGKAFSQRTSLILHER
951	tr|A6QNQ0|A6QNQ0_BOVIN	1	Uncharacterized protein OS=Bos taurus GN=ZNF423 PE=2 SV=1	13.6	22	0.005	7	0.19	0.01	0.3	0.02	0.633333	0.19	0.02	0.31	0.02	DLTPETSGPR+EADLQVHVKHSHLGNPARAHK+GSHKCNVCSR+GSTPDSTLKPLR+GSTPDSTLKPLRGQK+GSTPDSTLKPLRGQKK+KEADLQVHVKHSHLGNPAR+KGAQTSPVPR+KTYQCIKCQMTFENER+LAGSSAASSPNGQGLQK+LCNQMFDSPAK+LDVNGLPYGLCAGCMAR+LPFKCTYCSR+MFRCTACNWDFRK+NIPLAHSK+NSVTSQEER+TSRVLEDR
952	tr|A6QNR7|A6QNR7_BOVIN tr|L8IZP7|L8IZP7_9CETA	1	LRRTM3 protein OS=Bos taurus GN=LRRTM3 PE=2 SV=1;Leucine-rich repeat transmembrane neuronal protein 3 (Fragment) OS=Bos mutus GN=M91_21328 PE=4 SV=1	22.6	8	0.003	4	0.18	0.03	0.29	0.06	0.62069	0.21	0.01	0.28	0.02	ELHLEHNQFSK+ENTIICASPKELQGVNVIDAVK+IRSLARNVFAGMIR+LLSLHLRSNSLR+NICSLVNWLKSFK+NLELLDLGYNRIR+NVFAGMIR+NYSICGK+NYSICGKSTTERFDLAR+QLQQRSLMRR+SGSRECEDCPK+SLARNVFAGMIR
953	tr|A6QNS2|A6QNS2_BOVIN tr|L8ITR9|L8ITR9_9CETA	1	UBE4B protein OS=Bos taurus GN=UBE4B PE=2 SV=1;Ubiquitin conjugation factor E4 B (Fragment) OS=Bos mutus GN=M91_12836 PE=4 SV=1	21.7	29	0.008	8	0.16	0.05	0.3	0.03	0.533333	0.21	0.04	0.26	0.02	ACADAGLLDESFLR+AQMQTDDR+CLNFYGLLIQLLLR+DLKVENPEK+DQQQARQSQLAQDER+DRDVIFLSSLSAQFK+DVIFLSSLSAQFKQNPK+EAALSYMAAVVNANMK+EAALSYMAAVVNANMKK+ETDMLNYLIECFDRVGIEEK+IFRVSWKDR+IHEVQEEMK+IHEVQEEMKNKEQWDQLPR+ILHSILLNGETR+KAPKMCSQPAVSQLLSNIR+LETVDPTYIFHPR+LLAEKVEEIVAKNAR+LRAIRELNR+LVEVMFMTNPAVQPR+NNESQWKDSPLATR+QRPPGTGPPLLSASPGGSAPSR+QVQKPFLRPELGPR+SIILRHLLNSPTDPFNR
954	tr|A6QNW5|A6QNW5_BOVIN tr|F1MJY6|F1MJY6_BOVIN tr|L8I729|L8I729_9CETA	1	RALGDS protein OS=Bos taurus GN=RALGDS PE=2 SV=1;Uncharacterized protein (Fragment) OS=Bos taurus GN=RALGDS PE=4 SV=1;Ral guanine nucleotide dissociation stimulator (Fragment) OS=Bos mutus GN=M91_19122 PE=4 SV=1	7.6	10	0.003	3	0.22	0.04	0.27	0.05	0.814815	0.16	0.03	0.31	0.06	EGTSKFATLEMNPKR+GTKVRHGASSTLPR+KGKEHLAPTVR+LINFEKRR+TFTKGTKVR+TVKAGTLEK
955	tr|A6QNW9|A6QNW9_BOVIN tr|L8IZ61|L8IZ61_9CETA	1	APOLD1 protein OS=Bos taurus GN=APOLD1 PE=2 SV=1;Apolipoprotein L domain-containing protein 1 OS=Bos mutus GN=M91_15890 PE=4 SV=1	22.4	15	0.003	4	0.19	0	0.29	0.01	0.655172	0.18	0.01	0.34	0.02	ELQGADALR+EMLSCLDFFCRGQGGGDR+LHGQLLRLR+RAEGATRVSQAVLK+VSQAVLKAKIQK
956	tr|A6QNY0|A6QNY0_BOVIN tr|E1B9V4|E1B9V4_BOVIN tr|L8I5D1|L8I5D1_9CETA	1	TTF1 protein OS=Bos taurus GN=TTF1 PE=2 SV=1;Uncharacterized protein OS=Bos taurus GN=TTF1 PE=4 SV=2;Transcription termination factor 1 OS=Bos mutus GN=M91_08318 PE=4 SV=1	19.3	12	0.005	8	0.16	0.01	0.32	0.03	0.5	0.18	0.02	0.31	0.02	AATTIKRMYR+ASQRLVSSPLK+DRAATTIK+DRAATTIKR+ESSSLETQTPIFVKK+IYQSLHGNDWK+KMFDVNNYKGR+KMSPQELNEMDSKLQLNPEGR+MSPQELNEMDSKLQLNPEGR+MTNGRDVYR+SSLSVALK+SSLSVALKFSQINGQINHGAWSKTETQK+VETRNWMQCKSK
957	tr|A6QP00|A6QP00_BOVIN tr|F1N1N9|F1N1N9_BOVIN tr|L8IFE6|L8IFE6_9CETA	1	HERC5 protein OS=Bos taurus GN=HERC5 PE=2 SV=1;Uncharacterized protein OS=Bos taurus GN=HERC5 PE=4 SV=2;E3 ISG15--protein ligase HERC5 (Fragment) OS=Bos mutus GN=M91_13345 PE=4 SV=1	15.2	10	0.003	4	0.17	0.04	0.29	0.04	0.586207	0.17	0.02	0.34	0.02	ACMRLAGIVDQERSALSSLPTFNLIVR+ELMVSFSGEIGYNFGGVR+ENSYVNLR+GGELFAWGQNLDGQLGVGR+LWLFPSAAGLR+NDCGQLGLGHTYNK+QHTLAYVSDTGKVFSFGSGKEGQLGNGGTR+SALSKRPEATR+VTQIACGR+VTQIACGRQHTLAYVSDTGKVFSFGSGK
958	tr|A6QP09|A6QP09_BOVIN tr|F6R277|F6R277_BOVIN tr|L8ICK6|L8ICK6_9CETA	1	TRMT1 protein (Fragment) OS=Bos taurus GN=TRMT1 PE=2 SV=1;Uncharacterized protein OS=Bos taurus GN=TRMT1 PE=4 SV=1;N(2),N(2)-dimethylguanosine tRNA methyltransferase (Fragment) OS=Bos mutus GN=M91_12630 PE=4 SV=1	27	12	0.004	6	0.17	0.02	0.3	0.03	0.566667	0.18	0.02	0.34	0.01	AAGETVEERR+ACHEMALRTVLHSLDLR+ARPGGKAAGETVEER+EGANLALEDQPRTAAVGEICEEGLR+EGTCQQGGQCCYSHSPPSPK+EVPGLRSVVANDASARAVDLMR+FAREVPGLRSVVANDASAR+FHTAERIR+LGKASAASGGR+LSESSPAFR+MLMYQHQK+QALVFQCVGCGAFHLQRLGKASAASGGR+TVLWLSPTLR+VFTGQAKVK+VFVRVFTGQAK
959	tr|A6QP44|A6QP44_BOVIN	1	FUK protein OS=Bos taurus GN=FUK PE=2 SV=1	21.2	23	0.007	8	0.2	0.02	0.3	0.01	0.666667	0.19	0.02	0.3	0.01	AAFVCAGIVSVSSELSLR+AARHYEGAGQLLIRR+ACWRLSWEQLQPCLDRGATLAAR+ALACVADVLGCMAEGR+ALACVADVLGCMAEGRGGLR+APGPRDLLWMLDPQEDGGR+DLFFRQALHKAR+DLLWMLDPQEDGGR+DLLWMLDPQEDGGRALR+HYEGAGQLLIR+IPEPELRLAVGPR+IVCCNLDDMR+LARNLLQDVLRSWYAR+LNDHLLLVYTGKTRLAR+LPAVVQNAR+LSWEQLQPCLDR+QGTGTYLNMSWSKFFQKTGIR+VVGAEALIHAVLHLEQVLTTGGGWQDQVGGLMPGIK
960	tr|A6QP68|A6QP68_BOVIN tr|L8J170|L8J170_9CETA	1	tRNA pseudouridine synthase (Fragment) OS=Bos taurus GN=PUSL1 PE=2 SV=1;tRNA pseudouridine synthase (Fragment) OS=Bos mutus GN=M91_10928 PE=3 SV=1	21.5	5	0.002	1	0.13	99.99	0.32	99.99	0.40625	0.14	99.99	0.41	99.99	AILESRDPLGKHQSR+LNSVMPVKFTISSR+MTAVLVAVGLGALMPAQVK+MTAVLVAVGLGALMPAQVKAILESR+VAPAHGLFLKSVLYEGLGK
961	tr|A6QP71|A6QP71_BOVIN	1	CDH15 protein OS=Bos taurus GN=CDH15 PE=2 SV=1	11.5	19	0.006	10	0.18	0.02	0.28	0.02	0.642857	0.2	0.03	0.3	0.03	AEATDADDPETDNAALR+DYDPEDWLQVDGATGR+EKTDRFR+GSGSSPGTR+GSGSSPGTRGFCMDCR+TTSGTTSLTTTSRGAGRR+TVQVGLDR
962	tr|A6QP89|A6QP89_BOVIN tr|L8IFM8|L8IFM8_9CETA	1	MYBPC1 protein OS=Bos taurus GN=MYBPC1 PE=2 SV=1;Myosin-binding protein C, slow-type (Fragment) OS=Bos mutus GN=M91_17020 PE=4 SV=1	22.6	27	0.009	16	0.14	0.01	0.33	0.02	0.424242	0.19	0.01	0.31	0.02	ADKAIMEGSGRIR+AIMEGSGR+DDPRYRMFSNQGVCTLEIR+EAGTAPVKEPNKEK+EIIEAPKIRIPR+EKEAGTAPAKEPNK+ENYAGNYRCEVTYKDK+EPNKEKEAGTAPAK+GGRVRFVVELADPK+KAERSHSGK+KSAAFARILDPAYQVDK+LNFDLCK+LRLEIPISGEPPPK+NEAGEAHASIKIK+NGEEIIPGPKSR+NGLPVQETDHLKIVHKGR+NSETDTIVFIR+QLEDTKAYCGER+RSGEGQDDAGELDFSGLLKR+SGEGQDDAGELDFSGLLK+SGEGQDDAGELDFSGLLKR+VEKFVETASIDIR+VYTFEMQIIK
963	tr|A6QP90|A6QP90_BOVIN tr|L8I678|L8I678_9CETA	1	KRT32 protein OS=Bos taurus GN=KRT32 PE=2 SV=1;Keratin, type I cuticular Ha2 (Fragment) OS=Bos mutus GN=M91_00636 PE=3 SV=1	37.8	16	0.006	11	0.12	0.01	0.49	0.03	0.244898	0.13	0.02	0.23	0.02	ADLEMQVESLKEELMCLKK+ETLQLLNNRLAAYLERVR+ILDELTLCK+ILYSKAENAR+KNHEEEVGALR+LAADDFR+LAAYLERVR+LNIEVDAVSPVDLNK+LNIEVDAVSPVDLNKVLEEMRCR+NHEEEVGALR+RTVNTLEIELQTQHSLR+SKYEMELGLR+YEALVETNRRDVEEWFNK+YEMELGLRQLVEADTNGLR+YEMELGLRQLVEADTNGLRR
964	tr|A6QP99|A6QP99_BOVIN tr|L8IXG6|L8IXG6_9CETA	1	LMOD3 protein OS=Bos taurus GN=LMOD3 PE=2 SV=1;Leiomodin-3 OS=Bos mutus GN=M91_09012 PE=4 SV=1	19.8	28	0.009	16	0.21	0.01	0.27	0.01	0.777778	0.24	0.01	0.27	0.01	DQLLNDIR+ELQSEMEVMAPDPR+EMLLDFVNAMKKNK+EPPEKTNLKDVIK+GIVAIMRCLQFNETLTELR+MLEDERVPLTFVPTKEK+MPEAREPPEKTNLK+NRPPPLVEITPRDQLLNDIR+QEEQKQQQLK
965	tr|A6QPA4|A6QPA4_BOVIN tr|E1BGN5|E1BGN5_BOVIN	1	COL21A1 protein OS=Bos taurus GN=COL21A1 PE=2 SV=1;Uncharacterized protein OS=Bos taurus GN=COL21A1 PE=4 SV=2	13	9	0.004	6	0.15	0.03	0.3	0.05	0.5	0.2	0.04	0.29	0.05	DAAEAARDSR+ITLFAIGVGSETEEAELR+LCEESVCPTR+LCEESVCPTRIPVAAR+LCEESVCPTRIPVAARDEK+SQDEVKDAAEAAR+VQLLPTKIK
966	tr|A6QPG6|A6QPG6_BOVIN tr|L8I1I4|L8I1I4_9CETA	1	LANCL2 protein OS=Bos taurus GN=LANCL2 PE=2 SV=1;LanC-like protein 2 OS=Bos mutus GN=M91_00294 PE=4 SV=1	16.6	4	0.002	3	0.19	0.05	0.34	0.08	0.558824	0.16	0.03	0.27	0.05	DLLQQMEEGLK+EVVNAIIESGK+EVVNAIIESGKALSK+IKDLLQQMEEGLK+QAEEPPCSR+RVTFLCGDAGPLAVGAVVYHK+SGNYPSSLSNETDR
967	tr|A6QPL7|A6QPL7_BOVIN tr|L8ILA2|L8ILA2_9CETA	1	DDN protein OS=Bos taurus GN=DDN PE=2 SV=1;Dendrin (Fragment) OS=Bos mutus GN=M91_03102 PE=4 SV=1	23.6	16	0.004	2	0.2	0.02	0.25	0.02	0.8	0.31	0.1	0.22	0.06	AGGARRSPPGRPRPEPR+EEGEGAAVLPSPCRK+GAEGSEKVASGTR+GEGVFVIDATCVVIR+GLLGGSPGCGTDRPRLESGK+GSGEGREGRDQTWLPK+QGRGLLGGSPGCGTDRPR+TAELSGNAR+TEGGCAKKR+TGPPEGGKTAELSGNAR+VAHSAGLPAPSRPER
968	tr|A6QPM5|A6QPM5_BOVIN	1	ILDR2 protein OS=Bos taurus GN=ILDR2 PE=2 SV=1	24.1	14	0.005	5	0.12	0.02	0.39	0.04	0.307692	0.18	0.02	0.29	0.03	ADGNKQDLRGGSR+DLPYHSNSEKKR+FKSYCQDRMGESLGMSSPR+GSGLERQVRPEGASRGGSLETPSK+LVSRTPGTTPKYDHSFR+MGESLGMSSPR+MGESLGMSSPRTQSLSKR+NEDSVEVLVLGR+NLEWDPYLDCLDSRR+QDLRGGSR+QVRPEGASR+RTVRVVASK+TPGTTPKYDHSFR+VAMLFQPTVLHCR+VVASKQGSTVTLGDFYRGR
969	tr|A6QPP2|A6QPP2_BOVIN	1	SERPIND1 protein OS=Bos taurus GN=SERPIND1 PE=2 SV=1	20.4	26	0.005	4	0.23	0.05	0.25	0.03	0.92	0.18	0.04	0.31	0.02	AADFSDPAFLAHTNR+DDGGGEPESMEPR+DDGGGEPESMEPRWGR+DYDLVGALR+GAFLAASDQELDCDVLR+LNLLNAQFAFDLYR+QLPVLDDFKTQVR+TLGPWGQRDDGGGEPESMEPR+TSCLLFLGR
970	tr|A6QPQ1|A6QPQ1_BOVIN	1	NEPN protein OS=Bos taurus GN=NEPN PE=2 SV=1	32	19	0.005	6	0.22	0.02	0.26	0.03	0.846154	0.22	0.04	0.26	0.03	AKGTDVRGGQCVAPAER+DLKQLQVLNLR+DLKQLQVLNLRNNR+ETKKKPK+EVKDLKQLQVLNLR+GTDVRGGQCVAPAER+IMKQCEHHLHLTEKSK+IPINLPKSLLSLKMER+LDISNNLIRKVTAQDFR+LDLKGNAIQDIAER+LDLKGNAIQDIAEREVK+LNDNSIYVLHGSDFEGLKK+LNDNSIYVLHGSDFEGLKKLK+LPARLQKLDISNNLIR+LRHLYLDGNPWNCTCSLLR+LTEVPSGIPSTTK+QLQVLNLRNNR
971	tr|A6QPR1|A6QPR1_BOVIN tr|F1N2K1|F1N2K1_BOVIN tr|L8IPF8|L8IPF8_9CETA	1	PCYOX1 protein OS=Bos taurus GN=PCYOX1 PE=2 SV=1;Uncharacterized protein OS=Bos taurus GN=PCYOX1 PE=4 SV=2;Prenylcysteine oxidase OS=Bos mutus GN=M91_09609 PE=4 SV=1	23.2	23	0.004	4	0.21	0.02	0.29	0.03	0.724138	0.2	0.03	0.29	0.01	ADTAHVWKIFSAAALTK+GGNKLVCSR+IAVIGAGIGGTSAAYYLR+IDVFEKGK+IDVFEKGKVGGR+LFVSYDYAVKQSWLAYPHYTPPEK+LIWHYGFQSLR+MDPAAPGLACSILR+YQSHDYAFSSVEK
972	tr|A6QPR4|A6QPR4_BOVIN tr|L8J2I0|L8J2I0_9CETA	1	APOL3 protein OS=Bos taurus GN=APOL3 PE=2 SV=1;Uncharacterized protein (Fragment) OS=Bos mutus GN=M91_10501 PE=4 SV=1	25.2	8	0.002	2	0.23	0.09	0.31	0.01	0.741935	0.18	0.03	0.24	0.11	DSVSREQLELLLTEK+EAKHLHEGAKTESAER+ELEKKLEELIR+FMTVGQVSAR+HLHEGAKTESAERMR+KRFLEEFPR+RFMTVGQVSAR+RTPQIVSSTKNLIQALK+TESAERMRQMAK
973	tr|A6QPS6|A6QPS6_BOVIN	1	CD300LB protein OS=Bos taurus GN=CD300LB PE=2 SV=1	37	7	0.002	4	0.1	0.01	0.32	0.04	0.3125	0.25	0.04	0.3	0.04	DQGRASLPSPAAHR+ERMVSESECEQDQGTDGWGGR+LPPALLLLSLPGCLSIR+LPPALLLLSLPGCLSIRGPESVWGR+MRLPPALLLLSLPGCLSIR+NEVPSPPLPEGR
974	tr|A6QPT1|A6QPT1_BOVIN tr|L8ISL0|L8ISL0_9CETA	1	ATXN7L2 protein OS=Bos taurus GN=ATXN7L2 PE=2 SV=1;Ataxin-7-like protein 2 (Fragment) OS=Bos mutus GN=M91_01624 PE=4 SV=1	22.5	18	0.005	5	0.2	0.02	0.24	0.02	0.833333	0.28	0.02	0.27	0.02	AKDFDVLVAELK+EKGQGSRSR+EVQGRAKDFDVLVAELK+ICTRLLTCK+KPGPALAFEEKCSTLQELELPLFPEGK+LDAMTLIK+LEVEAPSR+LEVEAPSRKR+LSPGPTTFKR+MSSLPKPDGHGIR+NPKKLDAMTLIK+NPMASPSKELPGR+TCILEPTGK+TEGSPSEKEPGGAK+TEGSPSEKEPGGAKLPPK+THRKMAR+TSSREKGQGSR
975	tr|A6QPT4|A6QPT4_BOVIN tr|F1MVB0|F1MVB0_BOVIN	1	MPO protein OS=Bos taurus GN=MPO PE=2 SV=1;Uncharacterized protein OS=Bos taurus GN=MPO PE=1 SV=1	24.8	14	0.004	6	0.21	0.03	0.27	0.04	0.777778	0.17	0.04	0.29	0.03	AADYLHVALSLLER+AADYLHVALSLLERK+ASEMPELTSMHTLFVR+ASEMPELTSMHTLFVREHNR+DYLPLVLGR+IGLDLPALNMQR+IGLDLPALNMQRSR+ISNVFTNAFR+KQQQALAKISLPR+LMKLYQTPNNIDIWIGGVAEPLNKNGR+LNRQNQIAVDEIR+LNSRYQPMQPNPR+NGRVGPLLACLIGTQFR+NLTNQLGLLAVNTRFQDNGR+TITGQCNNRR
976	tr|A6QPT9|A6QPT9_BOVIN tr|F1MZQ1|F1MZQ1_BOVIN	1	LOC535754 protein (Fragment) OS=Bos taurus GN=LOC535754 PE=2 SV=1;Uncharacterized protein (Fragment) OS=Bos taurus GN=SAP130 PE=4 SV=2	13.7	12	0.005	8	0.18	0.01	0.33	0.01	0.545455	0.17	0.01	0.31	0.01	AMLQEIANQKGVSCR+CKLVMDQISEAR+DAEVAAREHMGSSSSLQSR+DVTTRITLPSHPALGTPK+EHMGSSSSLQSR+FGGRGLERSGGR+GLERSGGR+GRFGGRGLER+KAATDDDLHRINELIQGNMQR+KTLIPPQPPDVASPR+LLNKNGTVK+LVMDQISEAR+STSGSPRPAGAKPK+VEMSSQQFPR
977	tr|A6QPU2|A6QPU2_BOVIN	1	ARHGAP12 protein OS=Bos taurus GN=ARHGAP12 PE=2 SV=1	27.5	14	0.004	3	0.14	0.09	0.31	0.07	0.451613	0.13	0.01	0.36	0.03	AFYVPAQYVKEVGR+ALMPPVKPAAGLPNHSVKTAQSLHLQRSSENVNR+ELPEPLFTFNHFNDFVNAIKQEPRQR+GATIEMASKDK+IQQDSESGDELSSSSTEQIR+KFLTRRPTLQAVR+LNSDSHSPKVPGQNR+NRMTYQSIAIVFGPTLLKPEK+NVFELKTR+RLQEPIVLSKWR+RVIENGEKNR+VSAVKDLIK+WEDIHVITGALKMFFR+WRHSTIVLDANDK
978	tr|A6QPV0|A6QPV0_BOVIN tr|L8II61|L8II61_9CETA	1	EBI3 protein OS=Bos taurus GN=EBI3 PE=2 SV=1;Interleukin-27 subunit beta OS=Bos mutus GN=M91_12010 PE=4 SV=1	9.5	6	0.002	3	0.15	0.04	0.28	0.07	0.535714	0.24	0.1	0.25	0.06	EGHPVASSQPR+EGHPVASSQPRVR+EREGHPVASSQPR+EREGHPVASSQPRVR+HGAARFR
979	tr|A6QPV4|A6QPV4_BOVIN tr|L8IM50|L8IM50_9CETA	1	PPIL5 protein OS=Bos taurus GN=PPIL5 PE=2 SV=1;Peptidylprolyl isomerase-like 5 OS=Bos mutus GN=M91_12263 PE=4 SV=1	28.3	11	0.003	5	0.18	0.02	0.31	0.04	0.580645	0.22	0.03	0.26	0.04	EPPVDICLSKANSSSLKGFLSAVR+FVDEGKATVRLK+IKALPVQFCQLRELTYLK+LDDNELIR+MKLHCEVEVVSR+NLRFLSAARNK+TKMVITSKK+TPPGPRAGGERGGR+VDMRMLCLKNLR
980	tr|A6QPY1|A6QPY1_BOVIN tr|L8J2E1|L8J2E1_9CETA	1	LOC615587 protein OS=Bos taurus GN=LOC615587 PE=2 SV=1;Uncharacterized protein (Fragment) OS=Bos mutus GN=M91_02891 PE=4 SV=1	14.8	6	0.002	2	0.18	0	0.41	0.11	0.439024	0.1	0.08	0.26	0.03	EPVIASSFSLVK+NSISCKSK+NSISCKSKQPAGQRPGSLR+QLKEKCCPVPR+QPAGQRPGSLRR
981	tr|A6QPZ7|A6QPZ7_BOVIN tr|F1MRF5|F1MRF5_BOVIN tr|L8IG22|L8IG22_9CETA	1	Acyl-coenzyme A oxidase OS=Bos taurus GN=ACOX2 PE=2 SV=1;Acyl-coenzyme A oxidase OS=Bos taurus GN=ACOX2 PE=1 SV=1;Acyl-coenzyme A oxidase OS=Bos mutus GN=M91_00823 PE=3 SV=1	13.2	4	0.002	3	0.19	0.02	0.3	0.02	0.633333	0.2	0.03	0.3	0.03	IFTEALEK+KFHILMLAQR+LGVPKSNYLSMVVVR+RACGGHGYSKLSGLPSLLTR+SATHALVQAQLICSGAR+SNYLSMVVVR+TIRSLGSEEQIAKWDPLCSK
982	tr|A6QQ44|A6QQ44_BOVIN tr|F6RG63|F6RG63_BOVIN	1	MRCL protein OS=Bos taurus GN=MRCL PE=2 SV=1;Uncharacterized protein (Fragment) OS=Bos taurus GN=MRCL PE=4 SV=1	31.2	16	0.005	9	0.13	0.03	0.29	0.02	0.448276	0.22	0.02	0.31	0.02	AGYKRGR+CGAGSQGWGPTGHR+IDGDCFTVSSEADTYYGAK+KCGAGSQGWGPTGHR+KCGAGSQGWGPTGHRAAGSR+LDPLGQMEAPPPPTVHPTK+LVEEEGSVGAPTPGLLLIGK+MGLNQALK+QESGPAGR+QESGPAGRSACSSPPR+QLVWATSSQLGCGR+TRAWLGLWPTTK+VQDILAFYLGR
983	tr|A6QQ54|A6QQ54_BOVIN tr|L8I550|L8I550_9CETA	1	LOC616319 protein OS=Bos taurus GN=LOC616319 PE=2 SV=1;Phosphate carrier protein, mitochondrial OS=Bos mutus GN=M91_12034 PE=3 SV=1	10.3	7	0.003	6	0.21	0.02	0.28	0	0.75	0.24	0.01	0.27	0.01	GSTAFDVLQR+LGFKGVWKGLFAR+MCDAGGYQALR
984	tr|A6QQ63|A6QQ63_BOVIN tr|F1N6U2|F1N6U2_BOVIN tr|G3MXV7|G3MXV7_BOVIN	1	MGAT4B protein OS=Bos taurus GN=MGAT4B PE=2 SV=1;Uncharacterized protein (Fragment) OS=Bos taurus GN=MGAT4B PE=4 SV=2;Uncharacterized protein (Fragment) OS=Bos taurus GN=MGAT4B PE=4 SV=1	24.5	19	0.006	7	0.17	0.01	0.3	0.02	0.566667	0.13	0.03	0.36	0.03	AMSERQALRDGDSNR+DKDFGKHALR+DKPIDWLLDHILWVKVCNPEK+DRLHAAEQESLKR+ESSLQPAVR+SKELNLVLDEIK+TGVSVVMGIPSVR+TGVSVVMGIPSVRR+TWGRLPEDPR+VGQGRTGVSVVMGIPSVR+VGQGRTGVSVVMGIPSVRR
985	tr|A6QQM3|A6QQM3_BOVIN tr|F1N0Q0|F1N0Q0_BOVIN tr|L8IR46|L8IR46_9CETA	1	LRRC48 protein OS=Bos taurus GN=LRRC48 PE=2 SV=1;Uncharacterized protein OS=Bos taurus GN=LRRC48 PE=4 SV=2;Leucine-rich repeat-containing protein 48 OS=Bos mutus GN=M91_06571 PE=4 SV=1	22.4	11	0.004	7	0.19	0.02	0.29	0.04	0.655172	0.2	0.05	0.25	0.03	DTIVNAVGASHDIHLLKIDNR+ELAEMKHQYSIDELK+ENLMQARLEDEQAR+FEEKHLLSLNAIR+HQYSIDELKHRENLMQAR+LDDHMKELAEMK+LKIAKFEEK+MNRLYDMEPR+QEGILFK+RKAELDTFMECVQEAIQENQEQGK
986	tr|A6QQN9|A6QQN9_BOVIN tr|F6PR52|F6PR52_BOVIN tr|L8ISJ5|L8ISJ5_9CETA	1	DYRK3 protein OS=Bos taurus GN=DYRK3 PE=2 SV=1;Uncharacterized protein OS=Bos taurus GN=DYRK3 PE=4 SV=1;Dual specificity tyrosine-phosphorylation-regulated kinase 3 (Fragment) OS=Bos mutus GN=M91_02286 PE=4 SV=1	34.3	17	0.006	5	0.17	0.01	0.34	0.03	0.5	0.13	0.05	0.32	0.01	ADNLQSDGVNDSEK+GLPRYCSVTTQADGR+GSFGQVAR+GSFGQVARVYDHKLR+KFAQSILQSLDALHKNK+KRGPPGSK+LRQYVALKMVR+NHVCMAFELLSIDLYELIK+NKFQGFSIQLVR+QHGRSATK+QYVALKMVRNEK+RADNLQSDGVNDSEKCSPTASQGK+RCLHWDPSAR+RCLHWDPSARLTPAQALR+RLNITTEHLTRDPTQR+RVVNPANAFQGLGSK+SVPRPLTIEKVSGK
987	tr|A6QQP0|A6QQP0_BOVIN	1	MYEF2 protein OS=Bos taurus GN=MYEF2 PE=2 SV=1	33.5	11	0.004	3	0.21	0.01	0.31	0.01	0.677419	0.18	0	0.31	0.01	AAGDDSPHRQPSEPPGEPR+AAGDDSPHRQPSEPPGEPRR+ACRIMNGIKISGR+DRIGSKGNQIFVR+EVFSIAGTVK+FSQCGHVMFAEIKMENGK+GFLSGPMGSGMR+GFLSGPMGSGMRDRIGSK+IGGGIGFGGLEAMNSMGGFGGVGR+ISGREIDVRLDR+LGSTIFVANLDFK+LKEVFSIAGTVK+MSSTFDRMGPGIGAILERSIDMDR+NRVFISNIPYDMK+NSGTGEKKGPNR+SIDMDRGFLSGPMGSGMR+SIDMDRGFLSGPMGSGMRDR
988	tr|A6QQU3|A6QQU3_BOVIN tr|L8I189|L8I189_9CETA	1	TMEM117 protein OS=Bos taurus GN=TMEM117 PE=2 SV=1;Transmembrane protein 117 (Fragment) OS=Bos mutus GN=M91_20226 PE=4 SV=1	18	6	0.002	3	0.25	0.01	0.28	0.07	0.892857	0.15	0.02	0.28	0.08	DSESLKDLNRTK+FIGASLDVK+IYTVKDSESLKDLNR+KSPSEHSKDMGITR+NEQGMENQDKTYTR+NEQGMENQDKTYTRMR
989	tr|A6QQV8|A6QQV8_BOVIN tr|L8I213|L8I213_9CETA	1	LBR protein OS=Bos taurus GN=LBR PE=2 SV=1;Lamin-B receptor OS=Bos mutus GN=M91_07366 PE=4 SV=1	22.1	8	0.003	2	0.2	0.05	0.19	0.09	1.05263	0.25	0.04	0.33	0	DGTELELK+DMLEVKLTPLVLKPFGNSINR+HFLQFALAAILFATGLSVYLYAR+MPSRKFADGEVVR+NDMPHKHTQEK+NPADPRLAHLK+QKEPSLLNFPPPLPALGDLWETR+QRKSGSTSSSPSR+RSASASYQADLK+SGSTSSSPSR+SGSTSSSPSRRR
990	tr|A6QQW3|A6QQW3_BOVIN tr|A7E3V8|A7E3V8_BOVIN	1	Signal recognition particle subunit SRP68 OS=Bos taurus GN=SRP68 PE=2 SV=1;Signal recognition particle 68kDa (Fragment) OS=Bos taurus GN=SRP68 PE=2 SV=1	29.1	29	0.005	9	0.17	0.01	0.32	0.01	0.53125	0.16	0.02	0.34	0.01	AWSYAMQLK+DLPDVQELITQVR+DYALDVESGK+EFGDSLSLEILQIIKESQQQHGLR+ERLFESMLSECR+KVTEDLLTDNR+NENMAKGLQK+QAATMSEVEWRGR+QVPGGGGSGGSSGGGSGGSGGGR+RAPRPQDLIR+RNENMAKGLQK+SGLTGYIK+SGLTGYIKGIFGFR+SGLTGYIKGIFGFRS+TLNFKMGNR+TVPVKIDKVR+WNEALVLYDR
991	tr|A6QQX0|A6QQX0_BOVIN tr|L8IAT9|L8IAT9_9CETA	1	PBK protein OS=Bos taurus GN=PBK PE=2 SV=1;Lymphokine-activated killer T-cell-originated protein kinase OS=Bos mutus GN=M91_10604 PE=4 SV=1	19.3	5	0.002	4	0.22	0.01	0.23	0.04	0.956522	0.25	0.02	0.29	0.02	DPFPAAIILKVALNMAR+DSRDPFPAAIILK+GLSHSPWAVKK+LGFGTGVNVYLMQRSPR+LLHGDIKSSNVVIK
992	tr|A6QQX2|A6QQX2_BOVIN tr|L8ITY4|L8ITY4_9CETA	1	SNAPC1 protein OS=Bos taurus GN=SNAPC1 PE=2 SV=1;snRNA-activating protein complex subunit 1 OS=Bos mutus GN=M91_06935 PE=4 SV=1	24.5	6	0.002	3	0.19	0.04	0.27	0.03	0.703704	0.18	0.05	0.33	0.06	AEITEEFKDPNDR+AFHFTAMPKLLSYR+DDCEALLSR+GGEEKSER+IRVALKDWDEILK+LITSDVLEEMMNVHDHYQRMK+MQRAEITEEFK+NSQQSERCER
993	tr|A6QQZ2|A6QQZ2_BOVIN tr|A7MBA5|A7MBA5_BOVIN tr|L8HLY9|L8HLY9_9CETA	1	LRRC49 protein OS=Bos taurus GN=LRRC49 PE=2 SV=1;LRRC49 protein OS=Bos taurus GN=LRRC49 PE=2 SV=1;Leucine-rich repeat-containing protein 49 OS=Bos mutus GN=M91_19901 PE=4 SV=1	18.7	39	0.006	6	0.15	0.03	0.33	0.04	0.454545	0.15	0.02	0.33	0.04	EATEINMKNEALQK+INGTEVTQNDMIMAER+LCLQQITDQK+LLNFQHNSITQIQNISNLQR+LNRETPSFPGR+LWPQMFIELVR+MYIEDLVKEATEINMKNEALQK+NFLSHVDNLNGLDSLTELNLR+NKNSYMK+QFNALAQLR+QFNALAQLRR
994	tr|A6QQZ3|A6QQZ3_BOVIN tr|G3N0D4|G3N0D4_BOVIN tr|L8HRC4|L8HRC4_9CETA	1	LOC100124506 protein OS=Bos taurus GN=LOC100124506 PE=2 SV=1;Uncharacterized protein OS=Bos taurus GN=FAM46D PE=4 SV=1;Protein FAM46D OS=Bos mutus GN=M91_06290 PE=4 SV=1	19.7	2	0.001	1	0.17	99.99	0.23	99.99	0.73913	0.32	99.99	0.27	99.99	DFKPACEAEIK+DLDVIFGVELPSDQEFQVVK+DQLIEQGIIVK+DVVLGCLFDFLPKGVK+LNGSTASYILASHSGISYK
995	tr|A6QQZ4|A6QQZ4_BOVIN tr|L8I6X9|L8I6X9_9CETA	1	TTC16 protein OS=Bos taurus GN=TTC16 PE=2 SV=1;Tetratricopeptide repeat protein 16 (Fragment) OS=Bos mutus GN=M91_07701 PE=4 SV=1	23.3	24	0.006	3	0.12	0.03	0.39	0.05	0.307692	0.2	0.06	0.26	0	ALKDEQQEKGLYINR+ARSRQLMQNIFGAR+DEGAHLRMGLLQEK+DLHSALLLDPKHPQAK+DLSLNHSPRETK+ESSLTDSYISQTSLGSILGFR+EVKQGTTNADVYILR+EVKQGTTNADVYILRAR+KAAATQDQSWRMIQSPSK+LEPPLLETPK+LNKTQATQGSRR+QGTTNADVYILRAR+TDATQIQNQRPSR+TDATQIQNQRPSRTEAAWSPR+TDTTQIQSQRPSKMDATQIR+TEVTWGLNPSLSNMQTAQGPR+TQATQGSRR+TQATQGSRRR+TQSSDSGDSR
996	tr|A6QR12|A6QR12_BOVIN tr|L8HXI0|L8HXI0_9CETA	1	Uncharacterized protein OS=Bos taurus GN=YME1L1 PE=2 SV=1;ATP-dependent zinc metalloprotease YME1L1 OS=Bos mutus GN=M91_07118 PE=3 SV=1	35	21	0.007	5	0.17	0.03	0.29	0.03	0.586207	0.18	0.05	0.29	0.07	AQALTQKTNDSLRR+AQLLAQMDVSMGGR+DAMPINKATIMPR+DLFSTLR+DLGLSELK+DLGLSELKIGQIDQLVDSLLPGFYK+EHKNLAEALLTYETLDAK+ELEFSKDKILMGPER+EMVTMKELEFSKDK+FDQSVDPEIIAR+GSDVESLDKLMK+GSDVESLDKLMKTK+ICSDLQYWPGFIQSRGFK+LAETQHTAPSFVKGFLLR+LGVMTYSDTGKLSPETQSAIEQEIR+LIVFILLVVGIYGLLK+MVTKFGMSEKLGVMTYSDTGK+NVSSHWHTSHVSAQSFFENK+RICSDLQYWPGFIQSR+TLKSRTR+WNETRAQLLAQMDVSMGGR
997	tr|A6QR19|A6QR19_BOVIN tr|L8HU89|L8HU89_9CETA	1	ENO2 protein OS=Bos taurus GN=ENO2 PE=2 SV=1;Gamma-enolase (Fragment) OS=Bos mutus GN=M91_17653 PE=3 SV=1	23.3	30	0.009	12	0.17	0.02	0.31	0.02	0.548387	0.21	0.02	0.27	0.03	AGAAERELPLYR+IEEELGDEAR+IEEELGDEARFAGHNFR+IVIGMDVAASEFYR+IWAREILDSR+LAKYNQLMRIEEELGDEAR+LAQENGWGVMVSHR+LDNLMLDLDGTENK+LDNLMLDLDGTENKSK+TGAPCRSER+YNQLMRIEEELGDEAR
998	tr|A6QR27|A6QR27_BOVIN tr|G3MZL0|G3MZL0_BOVIN tr|L8J0T5|L8J0T5_9CETA	1	CCDC120 protein OS=Bos taurus GN=CCDC120 PE=2 SV=1;Uncharacterized protein OS=Bos taurus GN=CCDC120 PE=4 SV=1;Coiled-coil domain-containing protein 120 (Fragment) OS=Bos mutus GN=M91_09849 PE=4 SV=1	25	20	0.005	9	0.21	0.02	0.23	0.04	0.913043	0.2	0.02	0.31	0.02	AARPSSAAPASR+EVSVQQQIAAAAR+EVSVQQQIAAAARRLALAPELSAEQR+GRRNSVASPTSPTR+LALAPELSAEQR+MEVKGQLISSPTFNASAALFGEAAPQMK+NLALEGLR+NSGLASGPQR+NSVASPTSPTR+QVQADALRRLHELEEQLGEVR+QWSSSQDSQMGFPR+RLALAPELSAEQRR+RNSVASPTSPTRSLPR+TAGLPDPPR+TSLFAARTR
999	tr|A6QR33|A6QR33_BOVIN tr|L8I2D4|L8I2D4_9CETA	1	Uncharacterized protein OS=Bos taurus GN=VPS18 PE=2 SV=1;Vacuolar protein sorting-associated protein 18-like protein OS=Bos mutus GN=M91_00932 PE=4 SV=1	14.9	42	0.011	14	0.17	0.01	0.28	0.02	0.607143	0.2	0.02	0.33	0.01	DDAKVHK+EADFCFRQR+EAICSSLK+EAPIFTKQR+EMEEATASAQRIR+GPEGRGFVIATTR+IDLGKANEPNHMELGR+LGAAPPPAKGSAR+LGAAPPPAKGSARAK+LGALQGDPDALNLYR+NGQKVRPLAR+QARLEELQR+TYLDMNR+VEAVCTLTGQVVLR
1000	tr|A6QR34|A6QR34_BOVIN tr|L8IBE3|L8IBE3_9CETA	1	Hexokinase OS=Bos taurus GN=GCK PE=2 SV=1;Hexokinase (Fragment) OS=Bos mutus GN=M91_15821 PE=3 SV=1	35.3	11	0.003	4	0.11	0.03	0.36	0.04	0.305556	0.31	0.06	0.18	0.03	AAHMCAAGLAGVINR+ACESVSTRAAHMCAAGLAGVINR+AEQILAEFQLQEEDLKKVMR+ESRSEDVMR+GAALISAVACKKACMLGQ+LHPSFKERFHAIVR+LVDENLLFHGEASEQLR+MQKEMDR+MQKEMDRGLR+RRGDFEMDVVAMVNDTVATMISCYYEDR+TRGAFETR+VMLVKVGEGEAGQWSVK
1001	tr|A6QR38|A6QR38_BOVIN tr|L8I1Y0|L8I1Y0_9CETA	1	C23H6ORF47 protein OS=Bos taurus GN=C23H6ORF47 PE=2 SV=1;Uncharacterized protein OS=Bos mutus GN=M91_10760 PE=4 SV=1	22.2	9	0.003	0	-9	-9	-9	-9	1	-9	-9	-9	-9	GGSPEEELSPSVAEAPVEKPGR+LGGWLPRPWGR+LGQDPVDSDGTGK+LGQDPVDSDGTGKR+RLGGWLPRPWGR+SSGAAPEPSR+TQDSGAQR+TQDSGAQRSSGAAPEPSR
1002	tr|A6QR47|A6QR47_BOVIN	1	MARCH7 protein OS=Bos taurus GN=MARCH7 PE=2 SV=1	26	12	0.004	8	0.17	0.02	0.3	0.02	0.566667	0.16	0.02	0.35	0.01	DESSRISTSDIPSR+DSGRNSLR+DSGRNSLRSNFSPR+EKLQLNLEDFDIHELHR+GETSTIGSSDR+GSGLNDTYHSR+IASSMSSTFFSR+INSSHRSFQESSDNEGR+IPRRISVQPASSLSAR+LLSRIASSMSSTFFSRR+NDKTKNVPSR+NRCTPLFSRR+NSLRSNFSPR+NTGPWLSSSLR+SGRSTGITGILPGSLFR+SSSVVLGSFGTDLMRER
1003	tr|A6QR49|A6QR49_BOVIN tr|F1N1X5|F1N1X5_BOVIN tr|L8IZN4|L8IZN4_9CETA	1	PDK4 protein OS=Bos taurus GN=PDK4 PE=2 SV=1;Uncharacterized protein OS=Bos taurus GN=PDK4 PE=4 SV=2;[Pyruvate dehydrogenase [lipoamide]] kinase isozyme 4, mitochondrial (Fragment) OS=Bos mutus GN=M91_19791 PE=4 SV=1	26.2	11	0.004	6	0.17	0.03	0.29	0.03	0.586207	0.14	0.03	0.35	0.05	ALSDFVDTLIKVR+EDLTIKISDRGGGVPLR+ISDRGGGVPLRVIDR+LFSYTYSTAPTPVMDNSR+LVNTSSVQLVK+MKAARFVMR+QELPVRLANILK+YSPSPLSMKQLLDFGSENACER
1004	tr|A6QR61|A6QR61_BOVIN tr|L8IB61|L8IB61_9CETA	1	SNX12 protein OS=Bos taurus GN=SNX12 PE=2 SV=1;Sorting nexin-12 OS=Bos mutus GN=M91_16576 PE=4 SV=1	31.5	4	0.001	2	0.16	0	0.17	0.1	0.941176	0.26	0.13	0.35	0.02	CLHMFLQEEAIDR+IVVPPLPGK+IVVPPLPGKALK+NELERDSK+NYVPGKVR+NYVPGKVRQ+TNLPIFKLK
1005	tr|A7E301|A7E301_BOVIN	1	SHROOM1 protein OS=Bos taurus GN=SHROOM1 PE=2 SV=1	23.3	15	0.005	5	0.23	0.04	0.26	0.02	0.884615	0.21	0.02	0.27	0.03	AAEPPSPPASRAAYRQR+DLQAEQKQLQGAAQAWARR+GSENCIGSVR+LARVHRALAR+LDRLGRGAGLAR+LEELVQELAR+LGRGAGLAR+LIQDQLDAVRNDLGR+LQGAQRR+LRPAAPARPSAEHPR+LRTSAQPRPAAPARSGPR+MEALGPGGGRTSPASSTR+MLRDLQAEQK+QCSGEACSSSGFIGPEPREWQQR+TLAEFEGHQIR+TSAQPRPAAPARSGPR+WCFSEPGKLDRLGR
1006	tr|A7E302|A7E302_BOVIN	1	C26H10ORF6 protein OS=Bos taurus GN=C26H10ORF6 PE=2 SV=1	22	20	0.003	3	0.09	0.05	0.39	0.06	0.230769	0.19	0.02	0.29	0.02	ADSNISSGK+ADSNISSGKISEGSLR+AKTNKADSNISSGK+DRGVHESR+DSGFIGQSAVEKLILKSGK+ESSGNSNAGSSALKRK+GSDQNRVASTK+GSDQNRVASTKETK+HHPGESPLGAK+ISEGSLRSEYGTPTK+KQATVTEADIFKNSSR+LDELQKQLQEDIR+MMSVHTDCIVSMQILSTLMEITIR+MSLEKELK+NKTASSVASQETK+NSSRSLSSR+QIPLVDFQSLLINLMK+RMLDSPQKSNIK+RSSSDSWGPTSGSK+SSSDSWGPTSGSK+TNKADSNISSGK+TNKADSNISSGKISEGSLR+YVPPSYLLSKETKK
1007	tr|A7E306|A7E306_BOVIN tr|F1MF97|F1MF97_BOVIN	1	NID2 protein OS=Bos taurus GN=NID2 PE=2 SV=1;Uncharacterized protein OS=Bos taurus GN=NID2 PE=4 SV=2	12.9	19	0.006	7	0.2	0.03	0.29	0.04	0.689655	0.19	0.02	0.28	0.03	DTGQFTDEYLPEQR+EAPKIEMSSLDGENR+EAPKIEMSSLDGENRR+ERMVYWTDVAGR+ESYNVQLQLPAR+IEMSSLDGENR+IMILLLLSR+ISAPDSDLASPEPR+KLECILPDGTGRR+LECILPDGTGRR+LLCWADAGTKKLECILPDGTGR+LQGETDAPDLKGR+MVYWTDVAGR+QDTSPGVLGLAASYVR+RLQGETDAPDLK+RTMYWTDSGLDK+TVCERWRESLLEHYGGTPR+TYSLMSGAINQTQTYR
1008	tr|A7E357|A7E357_BOVIN tr|F1N218|F1N218_BOVIN tr|L8I220|L8I220_9CETA	1	NOP58 protein (Fragment) OS=Bos taurus GN=NOP58 PE=2 SV=1;Uncharacterized protein OS=Bos taurus GN=NOP58 PE=4 SV=2;Nucleolar protein 58 (Fragment) OS=Bos mutus GN=M91_06401 PE=4 SV=1	26.6	13	0.006	10	0.17	0.01	0.3	0.02	0.566667	0.2	0.02	0.33	0.01	EEPLSEEEPCTSTAVASPEKKK+EMTAMCLGLAHSLSR+EMTAMCLGLAHSLSRYR+GKISRMLAAK+ISGTGKALAKAEK+ISRMLAAKTVLAIR+LNLSCIHSPVVNELMRGIR+LRTLEDRGIR+MMAIAPNVTVMVGELVGAR+QLKKVLK+YDAFGEDSSSAMGVENR
1009	tr|A7E398|A7E398_BOVIN tr|G3X6A9|G3X6A9_BOVIN tr|L8HRJ4|L8HRJ4_9CETA	1	CXHXORF15 protein (Fragment) OS=Bos taurus GN=CXHXORF15 PE=2 SV=1;Uncharacterized protein OS=Bos taurus GN=TXLNG PE=4 SV=1;Gamma-taxilin OS=Bos mutus GN=M91_14746 PE=4 SV=1	27.7	15	0.003	4	0.14	0.01	0.22	0.06	0.636364	0.24	0.04	0.36	0.05	EENMQQAREEEER+EFLLKEATESR+GGGAEEAVEAGR+GGGAEEAVEAGRGGR+KYADLLEESR+MATRVEEAARGR+QEMEKMTK+QENIELGEK+QKFVIGTMEEAGMCGLGVK+VEEAARGRGGGAEEAVEAGR+YEQMKQQEIQLK
1010	tr|A7E3S8|A7E3S8_BOVIN	1	Heat shock 70kD protein binding protein OS=Bos taurus GN=ST13 PE=2 SV=1	29.5	6	0.002	5	0.18	0.02	0.33	0.03	0.545455	0.19	0.01	0.28	0.04	ERIERVK+EWVESMGGKIPPAAHKTK+LDYDEDASAMLKEVQPR+LEENTKEEK+LNPRLAILYAKR+LQKPNAAIRDCDRAIEINPDSAQPYK+QDPSVLHTEEMR+VQPRAQKIAEHR
1011	tr|A7E3U1|A7E3U1_BOVIN tr|F1MBU7|F1MBU7_BOVIN tr|L8IA53|L8IA53_9CETA	1	Transcription factor RAM2 OS=Bos taurus GN=CDCA7L PE=2 SV=1;Uncharacterized protein OS=Bos taurus GN=CDCA7L PE=4 SV=2;Cell division cycle-associated 7-like protein (Fragment) OS=Bos mutus GN=M91_02500 PE=4 SV=1	27.6	18	0.007	12	0.17	0.01	0.3	0.02	0.566667	0.18	0.02	0.33	0.02	DGRCATGILIHLAK+ENKAMLAQLLAELNSMPDFFPVR+ESFVSGEEDDDEEK+LQDNKKMILGR+NGSAEPLFPGSRLQDNK+NRYGEDVR+RDGRCATGILIHLAK+RTMNIKENK+RTNPARSARPPEK+TVCRNQSCGGVR+TVCRNQSCGGVRGQFCGPCLR
1012	tr|A7E3V3|A7E3V3_BOVIN tr|F1MXX0|F1MXX0_BOVIN tr|L8IBY4|L8IBY4_9CETA tr|Q2NL19|Q2NL19_BOVIN	1	Inner membrane protein, mitochondrial OS=Bos taurus GN=IMMT PE=2 SV=1;Uncharacterized protein OS=Bos taurus GN=IMMT PE=1 SV=1;Mitochondrial inner membrane protein (Fragment) OS=Bos mutus GN=M91_04846 PE=4 SV=1;Inner membrane protein, mitochondrial (Mitofilin) OS=Bos taurus GN=IMMT PE=2 SV=1	31.4	18	0.005	5	0.21	0.01	0.28	0.03	0.75	0.24	0.02	0.25	0.03	AAMDDSEIAGDKK+ASCSDSEFAQALTAALPPESLTRGVYSEETLRVR+DAMENEMRTQLR+DAMENEMRTQLRR+EEVAGAKSHITAAEGK+IESLAKSLEDALSQTAR+ISSVSEVMKESK+KEEVAGAKSHITAAEGK+KVEEVRDAMENEMR+LAEQELQFRR+LSADDLNALIAHAHRR+MKSVIENAKK+QAAAHTDHLRDVLR+QPASQPQK+RAFDSAVAKALEHHR+SHITAAEGKLHNMIIDLDNVVQK+TASADLPTVPLGSAVEAIR+TVEGALKERR+YSTSGSSR
1013	tr|A7MAY9|A7MAY9_BOVIN tr|F1N5U2|F1N5U2_BOVIN tr|L8J4U5|L8J4U5_9CETA	1	ZNF592 protein OS=Bos taurus GN=ZNF592 PE=2 SV=1;Uncharacterized protein OS=Bos taurus GN=ZNF592 PE=4 SV=1;Zinc finger protein 592 OS=Bos mutus GN=M91_17724 PE=4 SV=1	18.7	23	0.009	13	0.16	0.02	0.28	0.02	0.571429	0.21	0.02	0.29	0.03	DHIAPSLLHNGFR+DYMAMAAHFQR+ESYVSHMKK+GSDLPADPHSLGHNCGK+GSPKMPKSPK+GSPSVAASSPPAIPK+GSPSVAASSPPAIPKVR+KEPKPEPLPLGSPQEHERGGQK+LIRHSIKCLECHK+LKPAHSKLSSCVAALVALQAK+LSSCVAALVALQAK+LSSCVAALVALQAKR+NNHDTVKK+NPDLSQTSK+QCEQSFHTPNSLR+QCEQSFHTPNSLRKHIR+QMRDYMAMAAHFQR+RAEARPRLR+RPVSGVGAAPDTSNGTPVSSTK+SQPQPTQMSVPLVHQVK+TIKTSSGEIK+TLKRYPCR
1014	tr|A7MB01|A7MB01_BOVIN tr|F1N0I9|F1N0I9_BOVIN tr|L8HQK9|L8HQK9_9CETA	1	SART3 protein OS=Bos taurus GN=SART3 PE=2 SV=1;Uncharacterized protein (Fragment) OS=Bos taurus GN=SART3 PE=4 SV=2;Squamous cell carcinoma antigen recognized by T-cells 3 OS=Bos mutus GN=M91_04678 PE=4 SV=1	28.1	18	0.005	3	0.13	0.05	0.35	0.04	0.371429	0.18	0.05	0.29	0.02	ADEDDEKEWGDDEEEQPSKR+APGSALLPRQVYGARGK+DIRLVTNRAGKPK+DLVLSAHSRAVR+EAALAQQEEEKVEQR+EEAAALQALQLDR+EWGDDEEEQPSK+EWGDDEEEQPSKR+GNAKFANMWLEYYNLER+LAEYQAYIDFEMKIGDPAR+LCNNMQK+MDGMTIRENVIKVAISNPPQR+MSNADFAKLLLR+QVYGARGKGR+RVDFKQDSSK+VDFKQDSSKELEELR
1015	tr|A7MB02|A7MB02_BOVIN tr|G3N3R6|G3N3R6_BOVIN tr|L8IP86|L8IP86_9CETA	1	MGC152422 protein OS=Bos taurus GN=MGC152422 PE=2 SV=1;Uncharacterized protein (Fragment) OS=Bos taurus GN=MANEAL PE=4 SV=1;Glycoprotein endo-alpha-1,2-mannosidase-like protein (Fragment) OS=Bos mutus GN=M91_09541 PE=4 SV=1	8.7	3	0.001	2	0.16	0.02	0.3	0.03	0.533333	0.16	0.01	0.37	0.06	GRDDITLHDNIK+ISASYPRGR+RWAEHFIK
1016	tr|A7MB14|A7MB14_BOVIN tr|L8IK64|L8IK64_9CETA	1	GIGYF2 protein OS=Bos taurus GN=GIGYF2 PE=2 SV=1;PERQ amino acid-rich with GYF domain-containing protein 2 (Fragment) OS=Bos mutus GN=M91_15696 PE=4 SV=1	17.8	37	0.013	19	0.2	0.01	0.27	0.01	0.740741	0.18	0.01	0.32	0.01	DNKIPSDLLDK+EEMLALFLK+EESKTEQMEKAEEESR+EFAKQFLER+EFAKQFLERR+ELMKALQQQQQQQQQK+FDKPGRK+GGGGTVVGAPRGRSSSR+GRGECGFYQRSFDEVEGVFVR+IFREEQNGEDEDGGWR+ISDQNIIPSVTR+LRMEEEAARLR+LRRLEER+LTGRGGGGTVVGAPRGR+NASLSKSVGVSNR+NASLSKSVGVSNRQNK+NFSMSVNSAAVLRLTGR+NKNASLSK+NKNASLSKSVGVSNR+NSNMGFWDDAVKEVGPR+QQRELMKALQQQQQQQQQK+RPNFEEGGPVSVGRKHEFIR
1017	tr|A7MB24|A7MB24_BOVIN tr|L8I1U6|L8I1U6_9CETA	1	ABI2 protein OS=Bos taurus GN=ABI2 PE=2 SV=1;Abl interactor 2 OS=Bos mutus GN=M91_06410 PE=4 SV=1	24.6	7	0.003	2	0.29	0.04	0.22	0.05	1.31818	0.15	0.04	0.33	0.04	EIGILTTNK+HTPPTIGGSLPYR+IIAPANLERPVR+MAELQMLLEEEIPGGR+MGGLPRTTPPTQKPPSPPMSGK+MGGLPRTTPPTQKPPSPPMSGKGTLGR+NMAPSQQSPVR+THKIIAPANLERPVRYIR+TYSSSGSSGGSHPSSR+VSTQNMKMGGLPR
1018	tr|A7MB29|A7MB29_BOVIN tr|F1N0Y7|F1N0Y7_BOVIN	1	FAM5C protein OS=Bos taurus GN=FAM5C PE=2 SV=1;Uncharacterized protein OS=Bos taurus GN=BRINP3 PE=4 SV=2	16.4	17	0.006	8	0.16	0.03	0.32	0.03	0.5	0.17	0.03	0.3	0.01	CHKQPLISLPR+INNIQVFGYSMHFDPEAIR+IVHKLFSLSK+IVHKLFSLSKR+LEVHAIFISNDMR+LHHIQIASTAIK+LKLSTSEVVR+LSPPGQRR+LSTSEVVR+NFLGSPLPLAPEFFRNIR+NFLGSPLPLAPEFFRNIRLLGR+NIRLLGR+QPLISLPRQR+RLDLFSCLLR+RNFLGSPLPLAPEFFRNIR+YLLQKTDR
1019	tr|A7MB30|A7MB30_BOVIN tr|L8I753|L8I753_9CETA	1	EPS15L1 protein OS=Bos taurus GN=EPS15L1 PE=2 SV=1;Epidermal growth factor receptor substrate 15-like 1 (Fragment) OS=Bos mutus GN=M91_13782 PE=4 SV=1	18.9	65	0.018	27	0.19	0.01	0.28	0.02	0.678571	0.23	0.01	0.27	0.01	DMLSDVR+DMLSDVRQK+DQFALAMYFIQQKVSK+ESEKAEQER+GGFGAMDDPFK+GSTPDDFFKK+KTMFAGAVPVLPASPPPK+KTMFAGAVPVLPASPPPKDSLR+LDEMDQQKAK+LDEMDQQKAKLR+LPLDVLGR+LSQLHESHREAQR+QVDPAYTGRVGASEAALFLKK+RESEKAEQER+SGLSDIILGK+TMFAGAVPVLPASPPPKDSLR+VGASEAALFLK+VKPVLMNSKLPLDVLGR
1020	tr|A7MB36|A7MB36_BOVIN tr|L8HY99|L8HY99_9CETA	1	TRIM3 protein OS=Bos taurus GN=TRIM3 PE=2 SV=1;Tripartite motif-containing protein 3 (Fragment) OS=Bos mutus GN=M91_19705 PE=4 SV=1	22.4	13	0.003	1	0.22	99.99	0.29	99.99	0.758621	0.19	99.99	0.3	99.99	DKDGRLVR+DNPIEDELVFRVGSRGR+DVVEQHKAALQRQLEAVR+EKGEFTNLQGVSAASSGR+GATDRHFAGPHFVAVNNK+GEFTNLQGVSAASSGR+IGAGRLMGPK+KDNPIEDELVFRVGSR+LGSAPEVLLVRKHMR+LVRTGSAELR+QALVGQPASLTVTTKDKDGR+QALVSDLEAICGAK+QKAVRRPSSMYSTGGK+TGSAELRAEITGPDGTR
1021	tr|A7MB37|A7MB37_BOVIN tr|F1N2H4|F1N2H4_BOVIN tr|L8I163|L8I163_9CETA	1	AKAP8 protein OS=Bos taurus GN=AKAP8 PE=2 SV=1;Uncharacterized protein OS=Bos taurus GN=AKAP8 PE=4 SV=1;A-kinase anchor protein 8 OS=Bos mutus GN=M91_00982 PE=4 SV=1	14.8	68	0.017	20	0.18	0.01	0.3	0.01	0.6	0.17	0.01	0.32	0.02	ESTKPKPDPFKGIGQEHFFK+GGSSSGGEGMQDR+GGSSSGGEGMQDRESSFR+GSLDGFMRGR+GSLDGFMRGRGQGR+HLQSKFHK+INQRLDMMSKEGGR+KQLQIYDEPDTKQAR+LDMMSKEGGRGGSSSGGEGMQDR+NGGFGGQYSDCR
1022	tr|A7MB38|A7MB38_BOVIN tr|L8IRC8|L8IRC8_9CETA	1	SFRS4 protein OS=Bos taurus GN=SFRS4 PE=2 SV=1;Serine/arginine-rich splicing factor 4 (Fragment) OS=Bos mutus GN=M91_03267 PE=4 SV=1	35.2	21	0.005	7	0.17	0.02	0.28	0.02	0.607143	0.21	0.03	0.31	0.02	DGSYGSGR+DKYGPPTR+DLCGERVIVEHAR+DPAEEKVQNSDR+DSKSGSGGGSGSSKK+DVERFFKGYGK+EESRSRSR+FFKGYGKILEVDLK+QAGEVTYADAHKGR+SGRDKYGPPTR+SGSGGGSGSSKK+SGSRSPSR+SGSRSPSRSR+SGSSKSSHSKSR+SNSKSKPNLPSESR+SNSKSKPNLPSESRSR+SRSGSRSPSR+SRSQERGAEEAR+SRSRSGSK+TEYRLIVENLSSR
1023	tr|A7MB61|A7MB61_BOVIN tr|L8HSZ9|L8HSZ9_9CETA	1	NAB1 protein OS=Bos taurus GN=NAB1 PE=2 SV=1;NGFI-A-binding protein 1 OS=Bos mutus GN=M91_20691 PE=4 SV=1	10.5	10	0.003	4	0.15	0.01	0.32	0.01	0.46875	0.19	0.03	0.33	0.03	DELFALAR+DELFALARQISR+DELSPKRIK+DNALLTRR+EVTYKYTYR+NSSSREPHLKIPK
1024	tr|A7MB85|A7MB85_BOVIN tr|F1MCC8|F1MCC8_BOVIN	1	NWD1 protein OS=Bos taurus GN=NWD1 PE=2 SV=1;Uncharacterized protein OS=Bos taurus GN=NWD1 PE=4 SV=1	19.7	14	0.005	6	0.2	0.01	0.29	0.01	0.689655	0.2	0.02	0.29	0.03	CPPRVHLIVSACSGQR+DLGNCLAR+EELAAAAGALQDLR+EELAAAAGALQDLRSESAQGNESRSNK+ELYLSGPEK+FTIWDGGSK+GGALVASASR+HHLGLSAEVNR+IIPTSSGFIAPSRHGYLIR+KLITLPLVGKPLNLDR+KVAPQPLWFSDMVANLRK+KVVYSASGSK+LAFEEAR+LITLPLVGKPLNLDR+LKELPYHLLHAGR+LLVARVLGYIVSSR+LRLAFEEAR+LRQNDGHPHPPLVLFGPPGIGK+LRQNDGHPHPPLVLFGPPGIGKTALMCK+NKAHARYLK+TALMCKLAEQMSGLLGR+TLSQVQRDMLWASLPECGHPGRLR+VLGYIVSSRQGLSEAELK
1025	tr|A7MB94|A7MB94_BOVIN tr|L8IFS0|L8IFS0_9CETA	1	MAP1LC3C protein OS=Bos taurus GN=MAP1LC3C PE=2 SV=1;Microtubule-associated proteins 1A/1B light chain 3C OS=Bos mutus GN=M91_16308 PE=3 SV=1	33.1	10	0.004	2	0.17	0.01	0.34	0.01	0.5	0.19	0	0.31	0.02	KSLATRR+REEVAGIR+SLATRREEVAGIR+SLGSMNVTMAEIYR+TKFLVPQELTMTQFLSVIR+TKFLVPQELTMTQFLSVIRSR
1026	tr|A7MB98|A7MB98_BOVIN tr|L8HYQ3|L8HYQ3_9CETA	1	Uncharacterized protein OS=Bos taurus GN=ZFP36L1 PE=2 SV=1;Zinc finger protein 36, C3H1 type-like 1 OS=Bos mutus GN=M91_10584 PE=4 SV=1	15.7	4	0.002	0	-9	-9	-9	-9	1	-9	-9	-9	-9	FHQNQLLSSLKGEPAPALSSR+GEPAPALSSRDSR+KAVGTPAGGGFPRR+RALAGARDLSADRPR
1027	tr|A7MBA6|A7MBA6_BOVIN tr|A7Z047|A7Z047_BOVIN tr|F1MEA1|F1MEA1_BOVIN	1	TMEM132A protein OS=Bos taurus GN=TMEM132A PE=2 SV=1;Transmembrane protein 132A OS=Bos taurus GN=TMEM132A PE=2 SV=1;Uncharacterized protein OS=Bos taurus GN=TMEM132A PE=4 SV=2	18.5	17	0.004	9	0.19	0.02	0.29	0.01	0.655172	0.15	0.02	0.34	0.02	AGVRFLVPFAAHPLDGGR+DIRALVPLAKAEELVNTAPLTGVPR+EPEAAGVEEAER+FLVPFAAHPLDGGR+GPWLCLLVAFALDIVR+IEVTDTTLEQVR+IEVTDTTLEQVRGWRVPGPAEGAR+MVWEILVSEQDIR+MVWEILVSEQDIRALVPLAK+TAAAPRGPR+VLVGREPGVTSIEVR+VQDPRVASLEGGR+VQDPRVASLEGGRVLVGR+VQPVMGISLALSR+WAAGSMGGSGDVR+YPPANSSLGSRSETFLLLQPWPR
1028	tr|A7MBB2|A7MBB2_BOVIN tr|L8HZW9|L8HZW9_9CETA	1	CYTIP protein OS=Bos taurus GN=CYTIP PE=2 SV=1;Cytohesin-interacting protein OS=Bos mutus GN=M91_19608 PE=4 SV=1	31.6	8	0.002	3	0.28	0.16	0.25	0.07	1.12	0.19	0.02	0.16	0.07	GSVRKQLLK+INGVSTEGFTHK+KQNSNGNFMEYCAGPGHSSYSTLTGSFTVDDDNRR+KWVEFRSLQLQEQR+RLQMLADTVATLPRGR+SISSASSGSMSPLCEGNFSGMYGTLPRK
1029	tr|A7MBB7|A7MBB7_BOVIN tr|L8J3H3|L8J3H3_9CETA	1	NFKB2 protein OS=Bos taurus GN=NFKB2 PE=2 SV=1;Nuclear factor NF-kappa-B p100 subunit OS=Bos mutus GN=M91_06654 PE=4 SV=1	14.1	17	0.004	7	0.19	0.01	0.3	0.03	0.633333	0.2	0.02	0.28	0.03	AGASAPDMLCALLR+ICNYEGPAK+IERPVTVFLQLKR+ISRMDKTAGSVR+KNMMEIMIQK+KVMDLSIVR+KVMDLSIVRLR+LQRQRLR+LRANVNARTFAGNTPLHLAAGLGSPTLTR+NMMEIMIQK+NMMEIMIQKLQR+NMMEIMIQKLQRQR+QRLRSRPQGLTEAER+TASPSGSLLR+TFAGNTPLHLAAGLGSPTLTR
1030	tr|A7MBC4|A7MBC4_BOVIN tr|F6Q7P1|F6Q7P1_BOVIN tr|L8I366|L8I366_9CETA	1	ATF7IP protein OS=Bos taurus GN=ATF7IP PE=2 SV=1;Uncharacterized protein OS=Bos taurus GN=ATF7IP PE=4 SV=1;Activating transcription factor 7-interacting protein 1 OS=Bos mutus GN=M91_04341 PE=4 SV=1	12	20	0.005	6	0.21	0.03	0.3	0.01	0.7	0.2	0.01	0.27	0.03	AADSTSQSGK+DSKPEEEEQVIR+ETPCTLNVHVKSKQDDDLK+FGAAKEDLKK+GTVMQAPAVR+KAADSTSQSGK+LCALQCAVFDKTLAELKTR+LTKRFGAAK+MDSIEEPQKK+NTNTVRQMLESKR+QENPPNPPVSPGK+QMLESKR+QVNPQNSVTVR+TVLAELQAKIAR+TVLAELQAKIARLTK
1031	tr|A7MBE1|A7MBE1_BOVIN tr|F1N196|F1N196_BOVIN tr|L8I0G3|L8I0G3_9CETA	1	TBC1D17 protein OS=Bos taurus GN=TBC1D17 PE=2 SV=1;Uncharacterized protein OS=Bos taurus GN=TBC1D17 PE=4 SV=2;TBC1 domain family member 17 (Fragment) OS=Bos mutus GN=M91_17564 PE=4 SV=1	15.6	15	0.004	8	0.19	0.01	0.29	0.01	0.655172	0.21	0.01	0.31	0.01	DVSRTDR+GGTRALLR+GGTRALLRVLSR+IFSGGLSPSLR+IFSGGLSPSLRR+IFSGGLSPSLRREAWK+LSVEDVLTR+NSLLHGYRSLIER+RGAEPSSPRGSWAFSVSLGELR+SLIERDVSRTDR+VPELKARIFSGGLSPSLR+VVFEKGGVYLHTSAK
1032	tr|A7MBE2|A7MBE2_BOVIN tr|L8HVR8|L8HVR8_9CETA	1	SEC14L1 protein OS=Bos taurus GN=SEC14L1 PE=2 SV=1;SEC14-like protein 1 OS=Bos mutus GN=M91_06708 PE=4 SV=1	17.5	13	0.005	6	0.18	0.03	0.31	0.03	0.580645	0.17	0.02	0.3	0.03	ARDFNIDKAR+ARETMCQSLTWRK+DFNIDKAR+DSLGAHSITSPGGNNVQLIDR+ETMCQSLTWR+GKEIIEYYLR+GLVRALGEEALLR+HLWRPGVKALLRIIEVVEANYPETLGR+IIEVVEANYPETLGR+LGQMDTKGLVR+LGQMDTKGLVRALGEEALLR+LLKKIAGVDYVYFIQK+MVQKYQSPVR
1033	tr|A7MBE6|A7MBE6_BOVIN tr|L8IIX9|L8IIX9_9CETA	1	ACSM2A protein OS=Bos taurus GN=ACSM2A PE=1 SV=1;Acyl-coenzyme A synthetase ACSM2B, mitochondrial OS=Bos mutus GN=M91_09116 PE=4 SV=1	25.8	6	0.002	1	0.16	99.99	0.28	99.99	0.571429	0.2	99.99	0.36	99.99	DILYRLQVSK+GNVLPPGTEGDVGIR+IEFVLDLPK+IGPSEVENALMEHPAVVETAVVSSPDPIR+MAEHSHSSLGIKAKMDAGK+RDGWLDFK+VKPIRPIGIFSGYVDNLEK+VTVVLPRVPEWWLVILGCMRAGLVFMPGTIQMK
1034	tr|A7MBF4|A7MBF4_BOVIN tr|F1MX70|F1MX70_BOVIN tr|L8IUW8|L8IUW8_9CETA	1	Anoctamin OS=Bos taurus GN=ANO10 PE=2 SV=1;Anoctamin (Fragment) OS=Bos taurus GN=ANO10 PE=3 SV=2;Anoctamin OS=Bos mutus GN=M91_15452 PE=3 SV=1	11.6	9	0.003	5	0.17	0.06	0.27	0.04	0.62963	0.2	0	0.31	0.02	ECSDNTMR+EEPLYPSYKRQLR+FTLKFQPIDR+LYPGKSLLRR+QFIIKHELENLR+QFIIKHELENLRAR+WGTLVMKR+WGTLVMKRK
1035	tr|A7MBF8|A7MBF8_BOVIN tr|F1MEW4|F1MEW4_BOVIN tr|L8HWN3|L8HWN3_9CETA	1	Cystathionine beta-synthase OS=Bos taurus GN=CBS PE=2 SV=1;Cystathionine beta-synthase OS=Bos taurus GN=CBS PE=3 SV=1;Cystathionine beta-synthase OS=Bos mutus GN=M91_12135 PE=3 SV=1	27.3	22	0.005	6	0.19	0.04	0.31	0.02	0.612903	0.15	0.02	0.31	0.02	CELLAKCEFFNAGGSVK+CIIVMPEKMSTEKVDVLR+GSLEKEPPEDK+IGRNFGLK+ILPDILKK+ILPDILKKIGDTPMVR+ISLRMIEDAER+LDMLVASAGTGGTITGVAR+LDMLVASAGTGGTITGVARK+LDMLVASAGTGGTITGVARKLK+NYMSKFLSDKWMLQK+QMVFGVVTAIDLLNFVATRERNQR+SAGCPHLSGAHLGR
1036	tr|A7MBG5|A7MBG5_BOVIN tr|F1MS54|F1MS54_BOVIN tr|L8IR84|L8IR84_9CETA	1	TBC1D9B protein OS=Bos taurus GN=TBC1D9B PE=2 SV=1;Uncharacterized protein OS=Bos taurus GN=TBC1D9B PE=4 SV=2;TBC1 domain family member 9B (Fragment) OS=Bos mutus GN=M91_07680 PE=4 SV=1	16.5	8	0.003	3	0.24	0.04	0.21	0.07	1.14286	0.21	0.05	0.3	0.03	AKHLASQYWGSSRPAAVR+APPRPPRPHR+AQEAPTASQGLLR+DLHRSMPEHPAFQNELGIAALR+EFVTGMSGMYHGDLTEK+EFVTGMSGMYHGDLTEKLKVLYK+EVQKETIK+ISDFLQKMPSKPSGGSR+LMEQLANLAVR+NECYRATFR+NISALKRDLDAR+NTPVEDLGAKGAK+SMGKYSLATEEIERDLHR+TPQESQVVGEGGGGEGR+TRELVLKGIPESLR
1037	tr|A7MBJ3|A7MBJ3_BOVIN tr|L8I9Y0|L8I9Y0_9CETA	1	alpha-1,2-Mannosidase OS=Bos taurus GN=EDEM2 PE=2 SV=1;alpha-1,2-Mannosidase OS=Bos mutus GN=M91_20157 PE=3 SV=1	11.1	9	0.002	3	0.17	0.02	0.23	0.04	0.73913	0.3	0.02	0.28	0.02	DHKLDNR+DHKLDNRMESFFLAETVK+DLRDHKLDNR+KAGVEVEAGWPCSGPLLR+QKIPLLSCPSQPFTSK+VECGFATIKDLR
1038	tr|A7MBJ6|A7MBJ6_BOVIN tr|L8IQI4|L8IQI4_9CETA	1	Uncharacterized protein OS=Bos taurus GN=WDR59 PE=2 SV=1;WD repeat-containing protein 59 OS=Bos mutus GN=M91_03446 PE=4 SV=1	19.6	10	0.003	4	0.2	0.03	0.3	0.03	0.666667	0.12	0.04	0.35	0.03	DSQATAMSVDCVGQHAVLSGR+DYQLVTWSR+EDPPSSLLEEKK+EQVSISSFYYKERK+KPTVALSAVAGASQVK+LYSGSPTR+NAASALLVGR+NAASALLVGRK+NQSCLEPCLR+QLLESLLAHYCR+SEQLGLPQTLQQEFSLINVQIR+VDLYKWKDGSGEVGTTLQGHTR+VTTAYGSYQDANIPFPR+YTPFSNGLVTVMVPQLR
1039	tr|A7MBK3|A7MBK3_BOVIN tr|F6QCI5|F6QCI5_BOVIN	1	INPP5D protein OS=Bos taurus GN=INPP5D PE=2 SV=1;Uncharacterized protein OS=Bos taurus GN=INPP5D PE=4 SV=1	15.9	13	0.004	3	0.11	0.02	0.31	0.04	0.354839	0.2	0.01	0.36	0.07	AESLGIPQKLQLK+ALPTLESLQR+DGSFLVRASESISR+DSTLGPGRGESPPTPPSQPPVSPK+EAPASTENPR+EQESPKMLR+EYVFADSKKR+ITSWFLSK+ITSWFLSKGQGK+KEQESPKMLR+KITSWFLSKGQGK+LRRNQNYMNILR+QWEPANR+SGSSSLPHLKK+SKDSSEDK+SLKSLTSHDPMKQWEPANR+TGIANTLGNK+TGKDGSFLVR+TGKDGSFLVRASESISR+TIAIHTLWNIRIVVLAKPEHENR
1043	tr|A7YW25|A7YW25_BOVIN tr|L8J098|L8J098_9CETA	1	PIM2 protein (Fragment) OS=Bos taurus GN=PIM2 PE=2 SV=1;Serine/threonine-protein kinase pim-2 (Fragment) OS=Bos mutus GN=M91_09854 PE=4 SV=1	13.2	10	0.003	3	0.19	0.01	0.2	0.06	0.95	0.25	0.07	0.33	0	ASTPCGLSGLNLR+CLFAQVVAAVR+CLFAQVVAAVRHCHAR+DENILMDLR+DENILMDLRR+DIKDENILMDLR+DIKDENILMDLRR+GVVHRDIKDENILMDLR+HCHARGVVHRDIK+SRCLFAQVVAAVR
1044	tr|A7YW37|A7YW37_BOVIN tr|L8I9I3|L8I9I3_9CETA	1	CD58 protein (Fragment) OS=Bos taurus GN=CD58 PE=2 SV=1;Lymphocyte function-associated antigen 3 (Fragment) OS=Bos mutus GN=M91_20785 PE=4 SV=1	17.7	3	0.001	2	0.17	0.01	0.28	0	0.607143	0.17	0.03	0.38	0.01	DRVYLDIGSGNLTITR+GLSPSEAYVLKK+LTKSDEGLYELESPGVR
1045	tr|A7YWC6|A7YWC6_BOVIN tr|L8IDM0|L8IDM0_9CETA	1	SUB1 protein OS=Bos taurus GN=SUB1 PE=2 SV=1;Activated RNA polymerase II transcriptional coactivator p15 (Fragment) OS=Bos mutus GN=M91_00277 PE=4 SV=1	30.8	6	0.002	4	0.15	0.04	0.28	0.02	0.535714	0.17	0.04	0.35	0.07	DDNMFQIGK+DDNMFQIGKMR+VLIDIREYWMDAEGEMKPGRK
1046	tr|A7YWC7|A7YWC7_BOVIN tr|L8IY95|L8IY95_9CETA	1	TRAF5 protein OS=Bos taurus GN=TRAF5 PE=2 SV=1;TNF receptor-associated factor 5 OS=Bos mutus GN=M91_19080 PE=4 SV=1	16.8	19	0.006	8	0.16	0.01	0.34	0.02	0.470588	0.16	0.02	0.3	0.03	EPVLRKDLK+ESKIQQLAEMVKK+LCARAYLNGDGSGK+NAPRCNAK+NAPRCNAKIILGR+NTYIKDDTLFLK+QRVTLMLLDQSGK+REVLNLYVFCK+RGNLQEHER+VTLMLLDQSGK
1047	tr|A7YWD0|A7YWD0_BOVIN tr|L8I2W4|L8I2W4_9CETA	1	Uncharacterized protein OS=Bos taurus GN=ZNF346 PE=2 SV=1;Zinc finger protein 346 OS=Bos mutus GN=M91_05831 PE=4 SV=1	35	9	0.003	4	0.17	0.02	0.27	0.02	0.62963	0.21	0.02	0.33	0.03	ARRLWEAVSGSQPVGR+LADPAVTDSAGK+LKLMAHYGR+NLKLKQQSTK+QETKLKLMAHYGR+QSIQKDSTTLEN+RLTNPFLMASTLALHQNREMIDPDK+RLWEAVSGSQPVGREEVEHMIQK+YLAIHGMETLK
1048	tr|A7YWK8|A7YWK8_BOVIN tr|L8IA48|L8IA48_9CETA	1	Uncharacterized protein OS=Bos taurus GN=VPS54 PE=2 SV=1;Vacuolar protein sorting-associated protein 54 OS=Bos mutus GN=M91_21507 PE=4 SV=1	20.4	29	0.012	21	0.22	0.01	0.27	0.01	0.814815	0.22	0.01	0.27	0.01	DAASSKLLQEK+EPTGDSSSLCVAPSLVTDQHR+KSMSLLGALQSQANKFVNR+LISLVFGLLKQR+MASSHSSSPVPQGSSSDVFFK+MLNFPQWFDLLTDIFSK+NASPNSEPCSSDSVSEPECTTDSSSSK+NICKQMAK+TITTKNLALSSR+TKLSLLLDNER+TLLHTHDKSR+TSQAVKMLR+VNLPAALNDPRLAK+WTIYHSKVNLPAALNDPR
1049	tr|A7YWN9|A7YWN9_BOVIN tr|L8I5M8|L8I5M8_9CETA	1	Integrin beta OS=Bos taurus GN=ITGB7 PE=2 SV=1;Integrin beta OS=Bos mutus GN=M91_05598 PE=3 SV=1	17.1	10	0.004	5	0.07	0.03	0.33	0.04	0.212121	0.12	0.06	0.38	0.04	DCAECKAFGTGPLAR+EELLARGCLPGELEEPR+EVGRQNVSGNLDLPEGGFDAILQAALCQK+GCLPGELEEPRGR+IGFGSFVDKTVL+LSEAGDWVQCNQVR+QLGHALLVRLQEVTDSVR+REELLAR+TQDNQLFFFLAEDEAGGR+TVLPFVSTVPSKLR
1050	tr|A7YWT7|A7YWT7_BOVIN tr|L8IB02|L8IB02_9CETA	1	CLUAP1 protein OS=Bos taurus GN=CLUAP1 PE=2 SV=1;Clusterin-associated protein 1 OS=Bos mutus GN=M91_18869 PE=4 SV=1	21.1	8	0.003	3	0.15	0.03	0.31	0.03	0.483871	0.27	0.05	0.25	0.04	DLLNNVASDEANLEAK+DLLNNVASDEANLEAKIEKR+EEGKRLLK+MEQERFEETENTLR+NFTEMMR+RGRKPEPLEESDSDF+TKDLLNNVASDEANLEAK+TKGMEGSK+TKGMEGSKR+TPNFGLVSEVLLWLVK
1051	tr|A7YY63|A7YY63_BOVIN tr|L8HRR3|L8HRR3_9CETA	1	LOC100124517 protein OS=Bos taurus GN=LOC100124517 PE=2 SV=1;Protein KHNYN OS=Bos mutus GN=M91_13216 PE=4 SV=1	20.9	8	0.003	4	0.15	0.04	0.32	0.05	0.46875	0.18	0.01	0.32	0.04	ADKQLVVARGR+DLAEESEKWMAIIR+EEEKGNGGIR+EGTKQGGAR+EGTKQGGAREMDLGWK+GASLLQRLHNGEASPPR+GGNLVTGTQR+KEEEKGNGGIR+LGPSPGASQCAGVLR+MPTWGAGSPSPDRFAVSAEAEDKVR+TRETERLR+VERIFRVGMSVLPK
1052	tr|A7Z023|A7Z023_BOVIN tr|F1ML08|F1ML08_BOVIN tr|L8HP83|L8HP83_9CETA	1	CCDC132 protein OS=Bos taurus GN=CCDC132 PE=2 SV=1;Uncharacterized protein OS=Bos taurus GN=CCDC132 PE=4 SV=1;Coiled-coil domain-containing protein 132 (Fragment) OS=Bos mutus GN=M91_14196 PE=4 SV=1	20.5	13	0.004	5	0.16	0.02	0.26	0.03	0.615385	0.19	0.02	0.36	0.04	DFVDEQTGDAPVK+FQKLQYKDLCTHVTPDSYIPCLADLCK+KPFLQQFYSQTVSTASELRKPIYWIVAGK+LMQVGEEFCGSK+NDSLESTGLGLSSSR+NDSLESTGLGLSSSRLR+QLTNLVNVCLGSHINKKAR+SNFSILQLHEFK+TDLSIFK+TIVEGYANVKK+TRLDELR
1053	tr|A7Z024|A7Z024_BOVIN tr|L8IDS1|L8IDS1_9CETA tr|Q58DV1|Q58DV1_BOVIN	1	Protein XRP2 OS=Bos taurus GN=RP2 PE=2 SV=1;Protein XRP2 OS=Bos mutus GN=M91_21213 PE=3 SV=1;Protein XRP2 OS=Bos taurus GN=RP2 PE=2 SV=1	15.2	9	0.004	7	0.16	0.03	0.31	0.03	0.516129	0.18	0.02	0.32	0.03	CALACQQFRVR+DCKCALACQQFRVR+EVSMKAEDAQR+EVSMKAEDAQRVFHEK+GSVFFRNCRDCK+LIDEMVAK
1054	tr|A7Z025|A7Z025_BOVIN tr|L8IZM5|L8IZM5_9CETA	1	PRPF8 protein OS=Bos taurus GN=PRPF8 PE=2 SV=1;Pre-mRNA-processing-splicing factor 8 OS=Bos mutus GN=M91_14687 PE=4 SV=1	20.7	27	0.008	5	0.24	0.02	0.26	0.03	0.923077	0.16	0.04	0.31	0.01	AKADWWTNTAHYNR+ALNMAIPGGPK+ANIPWKVPGLPTPIENMILRYVK+DINLQDEDWNEFNDINKIIIR+DMNHTNSYGIIR+DTPLYTDNTANGIALLWAPRPFNLRSGR+DVMDSTTTQKYWIDIQLR+EAVVNTQELLDLLVK+EAVVNTQELLDLLVKCENK+ELGGLGMLSMGHVLIPQSDLR+EQSQLTATQTR+FLGFFMVPAQSSWNYNFMGVR+GPGNPVPGPLAPLPDYMSEEK+GVAKTVTKQR+HLIYYRFNTGPVGKGPGCGFWAAGWR+IDLTLLNRLLR+IMKANPALYVLRER+INTLFQKDR+KNNVNVASLTQSEIR+LLENMPMPWEQIR+LMRQIRMCK+LTRLYLK+LVVDSHVQYR+LWNLNNYR+MRLMKHDV…
1055	tr|A7Z029|A7Z029_BOVIN tr|F1MSL3|F1MSL3_BOVIN tr|L8IPZ1|L8IPZ1_9CETA	1	Phospholipid-transporting ATPase OS=Bos taurus GN=ATP10D PE=2 SV=1;Phospholipid-transporting ATPase OS=Bos taurus GN=ATP10D PE=3 SV=2;Phospholipid-transporting ATPase OS=Bos mutus GN=M91_15789 PE=3 SV=1	7.7	13	0.004	5	0.17	0.02	0.33	0.03	0.515152	0.14	0.02	0.35	0.01	ERVGLSKENLLLR+IDKQINNLVTK+IPIYDPSAVFAVMSATACAVEK+LVRSHLR+NACEMLMDTILK+NHFLAETSIDNR+NLFQRLSVR+NLFQRLSVRR+RSSSPSLASGK+SSSPSLASGK+TGTLTENKMVFR
1056	tr|A7Z030|A7Z030_BOVIN tr|F1N5E2|F1N5E2_BOVIN tr|L8HYR4|L8HYR4_9CETA	1	ZNF521 protein OS=Bos taurus GN=ZNF521 PE=2 SV=1;Uncharacterized protein OS=Bos taurus GN=ZNF521 PE=4 SV=1;Zinc finger protein 521 (Fragment) OS=Bos mutus GN=M91_01140 PE=4 SV=1	17.7	17	0.004	6	0.17	0.01	0.34	0.03	0.5	0.24	0.04	0.2	0.04	CASCLKEFR+DGSQSGSRMEDWKMK+EFPNQESLLK+FGSPVLGTPK+HHEQSHSDKLPFKCTYCSR+HSNEKKVYR+IHGTFHMQKTGNGATVQATGR+ISPSQSDEKK+KRAAQQTPDMTVPSSK+LCSQTFDSPAK+LPFKCTYCSR+MMQAVGGAPAR+QFTSVDDLQK+QVHCDLSGSRFGSPVLGTPK+RGFLSSSSLHGHMQVHERNK+SASPGVNIAPGSSRPGLGQTENLGAVEGK+TGNGATVQATGR+TPQVSPMPR
1057	tr|A7Z038|A7Z038_BOVIN	1	ABCD3 protein OS=Bos taurus GN=ABCD3 PE=2 SV=1	23.6	22	0.005	7	0.18	0.03	0.28	0.04	0.642857	0.17	0.04	0.31	0.02	DQVIYPDGKEDQK+DQVIYPDGKEDQKK+EMTRLAGFTAR+FDHVPLATPNGDILIRDLNFEVR+ITELMQVLKDLNQGK+LSGGEKQR+MSQALGRIVLAGR+MSQALGRIVLAGREMTR+NSSLAGATFLLLCLLHKR+SLWKHHEYYLHMDGR+SSLFRVLGELWPLFGGR+TFCDVWMIQNGTLIESGIIGR
1058	tr|A7Z042|A7Z042_BOVIN tr|L8I4F7|L8I4F7_9CETA	1	NKD1 protein OS=Bos taurus GN=NKD1 PE=2 SV=1;Protein naked cuticle-like protein 1 OS=Bos mutus GN=M91_19411 PE=4 SV=1	29.3	10	0.003	2	0.06	0.01	0.25	0.08	0.24	0.11	0.15	0.46	0.21	AQGKSVGVGHVARGAR+CPGGSSGPRQLRAAGTVGR+ESPEGDSFAVSAAWAR+GGTQDGSKHFVRSPK+KPQGADPGSFHFLDAPFAK+LEVALPPEK+MEKSGEPCSGSK+QEWTFTLYDFDNNGK+QRCPGGSSGPR+RESPEGDSFAVSAAWARK+SGEPCSGSK+VKLTVAPDGSQSK
1059	tr|A7Z055|A7Z055_BOVIN	1	PLAA protein OS=Bos taurus GN=PLAA PE=2 SV=1	24.4	31	0.007	11	0.16	0.01	0.34	0.01	0.470588	0.18	0.01	0.31	0.01	DFVTTAEDRSLR+DGEKVEAYQWSINERR+EGTRFSSHLVSLLNPR+ELSQATIDSKTGDLGDINAEQLPGR+GQMLGLGNTSFSDPFTGGGR+IGDVVGSSGASQQTSGK+IWKHGECAQTIR+LSIKHPSVNENFCNEKEGTR+NDLNPMFLDQVAK+NTVCSLSSGK+TASAEEIKAFERELSQATIDSK+TVNIYFPKKEAVTFDQANPTQILGK
1060	tr|A7Z060|A7Z060_BOVIN tr|L8HWY7|L8HWY7_9CETA	1	RNF219 protein OS=Bos taurus GN=RNF219 PE=2 SV=1;RING finger protein 219 OS=Bos mutus GN=M91_21248 PE=4 SV=1	25	16	0.006	8	0.17	0.01	0.31	0.03	0.548387	0.2	0.02	0.29	0.04	DDVDKLKEANK+DEELYDLPASCAPLSLSCLQLNTPDNRESSVVK+EAMNAICQRALSTDGKGSK+ENLRLKAEVDNR+ESSVVKAGGSK+GSKGTEEDMASK+KLKLENGGLVR+LENGGLVRENLR+LKLENGGLVR+LNSLRSFEMNR+NKNVNQSAKR+NLSLESQIK+NSSDEKEAMNAICQR+SESEKKSECFTSPK+TSSEASMDAAYLDKISELDSMMSESDNSK
1061	tr|A7Z062|A7Z062_BOVIN tr|L8IYK2|L8IYK2_9CETA	1	Uncharacterized protein OS=Bos taurus GN=ZC3H7A PE=2 SV=1;Zinc finger CCCH domain-containing protein 7A OS=Bos mutus GN=M91_05205 PE=4 SV=1	18.3	14	0.004	4	0.18	0.01	0.23	0.05	0.782609	0.23	0.11	0.26	0.07	ARKDHLIAPNDNDFGK+DNSTSCSHPVTK+EIIEKLYINR+ENGIQDMEQFYELWLKSQK+GAFSREAFFGGNGKISFTVFR+HEFEDNK+IKFVCAQCLR+KAYVRAELSLK+KCQYIGNCSFAHSPEER+KQMPLQFDLCNHIASGK+NLFNEGNDVYR+NLFNEGNDVYRER+QACQICFVKSGPK+QMPLQFDLCNHIASGK+RDLSTSTSR+RNKDNSTSCSHPVTK
1062	tr|A7Z068|A7Z068_BOVIN tr|F1N3Z1|F1N3Z1_BOVIN tr|L8INQ9|L8INQ9_9CETA	1	LMOD2 protein OS=Bos taurus GN=LMOD2 PE=2 SV=1;Uncharacterized protein OS=Bos taurus GN=LMOD2 PE=4 SV=2;Leiomodin-2 OS=Bos mutus GN=M91_16751 PE=4 SV=1	33.1	9	0.004	3	0.09	0.06	0.33	0.04	0.272727	0.22	0.02	0.32	0.04	ADDSAATAIADMLR+ANTVVKTFSLANTRADDSAATAIADMLR+GILAIMRALQHNTVLTELR+GSSIKQLRR+HIMGSQVEMEIVKLLR+MEDSSRPSTPQRSAHENLMEAIR+MSMTSLLTRNMDK+MSTFGYRRGLSK+QPNNILKEIKNSLR+QQESAQRALQNGQKK+TGANAEGMNGAVHSDSVHSDNARPKTFK
1063	tr|A7Z073|A7Z073_BOVIN tr|F1MGT4|F1MGT4_BOVIN tr|L8I1V4|L8I1V4_9CETA	1	SNAP91 protein OS=Bos taurus GN=SNAP91 PE=2 SV=1;Uncharacterized protein (Fragment) OS=Bos taurus GN=SNAP91 PE=4 SV=2;Clathrin coat assembly protein AP180 OS=Bos mutus GN=M91_15996 PE=4 SV=1	12.1	9	0.002	3	0.1	0.02	0.4	0.05	0.25	0.21	0.02	0.27	0.05	AFSYRQMAFDFARVK+DALEIYKR+FLTRMTRVSEFLK+GADGVMRTMAPEK+KGDLQWNAGEKK+LTGGANWQPK+SGSHGYDMSTFIRRYSR+SSPATTVTSPNSTPAK
1064	tr|A7Z075|A7Z075_BOVIN tr|L8HWS6|L8HWS6_9CETA	1	INO80B protein OS=Bos taurus GN=INO80B PE=2 SV=1;INO80 complex subunit B OS=Bos mutus GN=M91_06121 PE=4 SV=1	21.9	12	0.004	6	0.14	0.03	0.3	0.04	0.466667	0.21	0.04	0.29	0.04	CSVPGCPHPRR+EINERLLTARQR+GGRGASRGER+KEINERLLTAR+LGGPEGPGSPLLAT+LTKTAAPSGR+LTKTAAPSGRGGR+RGGRAVAPAPMVR+RLQAARR+TAAPSGRGGR+TAAPSGRGGRGASR
1065	tr|A7Z088|A7Z088_BOVIN	1	Uncharacterized protein OS=Bos taurus GN=YEATS2 PE=2 SV=1	30.9	39	0.007	11	0.16	0.04	0.31	0.03	0.516129	0.17	0.02	0.3	0.03	AAEWQRAMTMR+ACIVANYYASAGLLKVSEGSK+APAPSVISATSLVSTPNPISGKATVSGLLK+ASSSVTKAVGPK+DTNSNMDIEER+EQEEKQEEMKLYLPPTPGSEFIGDITQK+GGHMIAVSPQK+HKAIENSAR+IDHLETIQQLLTAVVK+IDIIHNLK+IDIIHNLKLDR+IHGSSFVTSAVK+IPLITAKSEDASCFSAK+LIEARRMMDK+LLLIPQGAILR+LSSNTEQRPSR+LSTASQASQGTGSPIPK+LYLTTNSKNPSGK+NTDLTGDETSR+NTDLTGDETSRLFVK+NTGRDTSSIAGSHKTEQR+NVYASVVEDMLLK+QALAVGYQAASHNRIPK+QAVAISGGQILVAKASSSVTK+QEDSLFASMPPLCPIGSHPK+…
1066	tr|A8E4P2|A8E4P2_BOVIN tr|L8J137|L8J137_9CETA	1	FARSB protein OS=Bos taurus GN=FARSB PE=2 SV=1;Phenylalanyl-tRNA synthetase beta chain OS=Bos mutus GN=M91_14932 PE=4 SV=1	17.9	11	0.003	3	0.21	0.05	0.28	0.04	0.75	0.2	0.03	0.28	0.03	EIISKEQGNEK+ETPENLAKLLTR+GGYAIKASEGPVFFPGR+GGYAIKASEGPVFFPGRCAEIFAR+IKTPMYKR+IRPYAVAAVLR+LFEISDIVIK+TTLLPGLLKTLAANR+VGIRETPENLAK+YDSFIELQEK
1067	tr|A8E646|A8E646_BOVIN	1	CARD11 protein OS=Bos taurus GN=CARD11 PE=2 SV=1	20.9	46	0.007	15	0.17	0.01	0.29	0.02	0.586207	0.21	0.02	0.3	0.02	DCEMYKHR+DMEEGLITSGDSFYIR+DQAFHSRDEAQTQYSQCLIEKDK+DSGTLEQSLPR+EDLELKCSTLGKDCEMYK+EGHQLLLLEGCIR+EGHQLLLLEGCIRGER+ELEEKNDEMRIEMVR+ENEMLKTK+EQVLELERENEMLKTK+GQEEDLMDASPSSSR+GSREEADTAHHTLRALR+HMLSRYINPAK+LLKDMEEGLITSGDSFYIR+LQRLMHR+NDEMRIEMVR+NDEMRIEMVRR+NLSLIPYSLVR+NTLQPEEPLPTTDPR+SPISLKRASDFQGR+TNGQEADDSSTSEDSPEDNR+VTGKEPTR
1068	tr|A8E658|A8E658_BOVIN tr|L8J0D9|L8J0D9_9CETA	1	PPIG protein OS=Bos taurus GN=PPIG PE=2 SV=1;Peptidyl-prolyl cis-trans isomerase G OS=Bos mutus GN=M91_01869 PE=4 SV=1	13.9	7	0.003	6	0.18	0.01	0.31	0.02	0.580645	0.23	0.03	0.26	0.02	DFMVQGGDFSEGNGR+DHSSSNSNR+DSRSSEREESQSR+ENQKSKGQENDHTHDK+ILSCGELVPKAK+MYSKNRDHSSSNSNR+NNEHDHNK+NNEHDHNKSK+NQESRSSHRK+NRDHSSSNSNREK+VSSGERWIKGDK
1069	tr|A8KC65|A8KC65_BOVIN tr|L8IHU6|L8IHU6_9CETA	1	SLC12A5 protein (Fragment) OS=Bos taurus GN=SLC12A5 PE=2 SV=1;Solute carrier family 12 member 5 (Fragment) OS=Bos mutus GN=M91_17919 PE=4 SV=1	10.8	30	0.007	10	0.19	0.01	0.29	0.03	0.655172	0.18	0.02	0.31	0.02	AEDASGEAAAMLNNMR+DLTTFLYHLR+EIQSITDESRGSIR+EIQSITDESRGSIRR+EVITIYS+FLNATCDEYFMR+IFTVAQMDDNSIQMK+LDRVMLVRGGGR+NVSMFPGNPER+RLMEAEK+RMHTAVR+VKGFCQVVISSNLR
1070	tr|A8QQJ5|A8QQJ5_BOVIN tr|E1B7G1|E1B7G1_BOVIN	1	Uncharacterized protein OS=Bos taurus GN=ZNF514 PE=2 SV=1;Uncharacterized protein OS=Bos taurus GN=ZNF514 PE=4 SV=2	19.2	5	0.002	1	0.22	99.99	0.22	99.99	1	0.28	99.99	0.27	99.99	DLYWEVMLENFK+EELFQRASVEKHIR+KPMLSQGLSKEELFQR+RGHESSESGTSSGLR+RHTGEKPYECGECGR+RPQAKKPMLSQGLSKEELFQR+TQPGKKSCK
1071	tr|B1H0W5|B1H0W5_BOVIN tr|L8IF34|L8IF34_9CETA tr|Q58D48|Q58D48_BOVIN	1	PDGFB protein OS=Bos taurus GN=PDGFB PE=2 SV=1;Platelet-derived growth factor subunit B (Fragment) OS=Bos mutus GN=M91_18845 PE=3 SV=1;Platelet-derived growth factor beta isoform 1, preproprotein OS=Bos taurus GN=PDGFB PE=2 SV=1	44.8	9	0.003	3	0.16	0.02	0.32	0.02	0.5	0.16	0.02	0.35	0.03	KATVTLVDHLACR+NVQCRPTQVQDR+SHSGGELESLSRGRR+SLGSPTVAAEPAVIAECKTR+TPGSSQEQRAR+TPGSSQEQRARTPQTR+TPQTRVTIRTVR+TRTEVFEISRR+VTIRTVRVR
1072	tr|B2CML0|B2CML0_BOVIN tr|L8J028|L8J028_9CETA	1	Brother of regulator of imprinted sites OS=Bos taurus GN=BORIS PE=2 SV=1;Transcriptional repressor CTCFL OS=Bos mutus GN=M91_17518 PE=4 SV=1	11.1	4	0.001	1	0.16	99.99	0.35	99.99	0.457143	0.16	99.99	0.33	99.99	EKPELSQAHLEKPSTTK+EVKQTFHCNFCKFTSSR+HMRTHSGEKPYECHICR+ISSVNRHMK+YASVEASKLK
1078	tr|B9X245|B9X245_BOVIN tr|G5E5W1|G5E5W1_BOVIN	1	Factor VIII OS=Bos taurus GN=F8 PE=2 SV=1;Coagulation factor V OS=Bos taurus GN=F5 PE=4 SV=1	27.2	39	0.013	14	0.24	0.02	0.22	0.02	1.09091	0.19	0.02	0.29	0.02	DVNSGLIGALLICR+ECQIPLGMASGR+ECQIPLGMASGRIR+EMIFPNTKSIVLTNLANVQENDTDNQGK+EMIHQEKEGPKPLDTK+ENGPTASDPPCLTYSYLSHVDLVK+ESVDQRGNQMMSDK+ETLIPENTVLPQVYTVIGTKNFLK+GNSTGTLMVFFGNVDSSGVK+HNIFNPPIIAR+IKGPSPSEVAHLRPELHHSGER+ISSHQHDGMEAYVK+ISSSSNNLMPLPTIPSDK+KFVKPNETQSYFWKVQHHMAPTK+KVVFEEFTDGSFTQAIYR+LELLGCEAQQQY+LENMFLLKPGLSEASGK+LNENLGTTIMAELNK+LNENLGTTIMAELNKLNLK+LWDYGMSRSPYALR+NLFSLSTKQNVR+NMASHPVSLHAIGVSYW…
5151	tr|D3JUI8|D3JUI8_BOVIN tr|L8HT81|L8HT81_9CETA	1	RNA-binding motif protein, X chromosome OS=Bos taurus GN=RBMX PE=1 SV=1;Heterogeneous nuclear ribonucleoprotein G OS=Bos mutus GN=M91_00804 PE=4 SV=1	50.1	34	0.008	10	0.2	0.02	0.28	0.02	0.714286	0.2	0.01	0.3	0.01	DDGYSTKDSYSSR+DGYGGSRDSYSSSR+DRDYSDHPSGGSYR+DSYGGPPR+DSYGGPPRREPLPSR+DYGHSSSR+DYGHSSSRDDYPSR+DYPSSRDTR+DYTYRDYGHSSSRDDYPSR+GAPRGGGRGGSR+GGGRGGSRSDR+GGRGGSGGTR+GGSGGTRGPPSHGGHMDDGGYSMNFNMSSSR+GLRGGRGGSGGTR+GPLPVKRGPPPR+RSAPSGPVRSSSGMGGR+SAPSGPVRSSSGMGGR+SAPSGPVRSSSGMGGRAPVSR+SDLYSSGRDRVGR+SGGPPPKRSAPSGPVR+SRGPPRGLR+SSSGMGGRAPVSR
5152	tr|D5KB40|D5KB40_BOVIN tr|F1MF47|F1MF47_BOVIN tr|L8IST9|L8IST9_9CETA	1	Transferrin receptor 2 OS=Bos taurus GN=TFR2 PE=2 SV=1;Uncharacterized protein OS=Bos taurus GN=TFR2 PE=4 SV=1;Transferrin receptor protein 2 OS=Bos mutus GN=M91_01944 PE=4 SV=1	17.1	16	0.004	4	0.16	0.05	0.3	0.05	0.533333	0.21	0.03	0.25	0.08	ASTPISNIFGCIEGR+DAWGPGAAKSAVGTAILLELVR+ERVAGSAGMAALAQDIR+FHAKTSPLLIGLIENILK+LMRMYNVR+LPAVAQAVAQLAGQLLIR+LPAVAQAVAQLAGQLLIRLSHDHLLPLDFGR+QNPGLWAAAGRR+SAVGTAILLELVR+TFSSMVSNGFQPRR+TSPLLIGLIENILK+VAGSAGMAALAQDIR
5153	tr|D5KB43|D5KB43_BOVIN tr|D5KB44|D5KB44_BOVIN tr|F1MNV6|F1MNV6_BOVIN tr|L8IH98|L8IH98_9CETA	1	KIAA0748 isoform 1-like protein (Fragment) OS=Bos taurus PE=2 SV=1;KIAA0748 isoform 2-like protein (Fragment) OS=Bos taurus PE=2 SV=1;Uncharacterized protein OS=Bos taurus GN=TESPA1 PE=4 SV=2;Uncharacterized protein OS=Bos mutus GN=M91_04330 PE=4 SV=1	10	6	0.002	5	0.2	0.04	0.28	0.03	0.714286	0.09	0.04	0.36	0.07	DRLSPPDHTPK+DRLSPPDHTPKR+IEMEDPCLMLASR+IEMEDPCLMLASRFK+LSPPDHTPK+NPMGKKVK+NSLDQVVWEVMDRVR
5158	tr|E1B6X8|E1B6X8_BOVIN	1	Uncharacterized protein OS=Bos taurus GN=FANCA PE=4 SV=2	9.3	8	0.002	3	0.13	0.02	0.32	0.01	0.40625	0.16	0.01	0.38	0.01	AFESWDLDSMVLAFLVVR+AWAELLEGR+FSTAAISYSLCK+IPPALYSAYR+KFQFIMFRWFPEAR+QAALEGPAVFPSYATWFQATFGSTRGIHSCSK+QEGLQLTYR+QGPWATHFVRALCGHRFLPAVLTR+RAWAELLEGR+TPALLSGLYRRVSAWDLGPR+VSAWDLGPR
5159	tr|E1B6Y9|E1B6Y9_BOVIN tr|L8IBW3|L8IBW3_9CETA	1	Uncharacterized protein OS=Bos taurus GN=TRPV5 PE=4 SV=1;Transient receptor putative cation channel subfamily V member 5 OS=Bos mutus GN=M91_00619 PE=4 SV=1	15	10	0.003	6	0.18	0.02	0.31	0.04	0.580645	0.21	0.03	0.27	0.02	AQDSLGNTVLHILVLQPNK+DNDLCVLKK+EARQILEQTPVK+EARQILEQTPVKQLVNFK+LAGVEGNTVMFQHLMQK+LDEMYMLQQQKIR+MGAPPSKAR+QILEQTPVKQLVNFKWR+SGICGYKYGLGDR+VAHEQDELWR
5160	tr|E1B6Z2|E1B6Z2_BOVIN	1	Uncharacterized protein OS=Bos taurus GN=HES3 PE=4 SV=1	22.7	3	0.001	2	0.16	0.08	0.22	0.04	0.727273	0.16	0.04	0.41	0.16	GPCAPPIWAPAPAAGGSRSPPPRR+LLSGGLPGASTSIPAPQSTSR+RGPCAPPIWAPAPAAGGSRSPPPR+RSPPPRR
5161	tr|E1B6Z5|E1B6Z5_BOVIN tr|L8IB55|L8IB55_9CETA	1	Uncharacterized protein OS=Bos taurus GN=CCNT2 PE=3 SV=2;Cyclin-T2 OS=Bos mutus GN=M91_16834 PE=3 SV=1	22.7	11	0.003	2	0.16	0.08	0.24	0.02	0.666667	0.26	0	0.31	0.09	EHPSNRHHPSSHKHSHSYSGSSSGGSK+EKHKEHPSNR+EKSGSLKLR+EQLENTPSRR+HSADGIAPTVLR+HSHSYSGSSSGGSK+IKVSSSERHSSSDEGSGK+IPITNAEKPEKYMAEKK+ISDHSSVKQDYTHK+QYISSHNSVFNHPLPPPPPVTYQVGYGHLSTLVK+SGSLKLRIPIPPTDK+SSGSSSSSSSSVK
5162	tr|E1B710|E1B710_BOVIN	1	Uncharacterized protein OS=Bos taurus GN=NKX3-2 PE=4 SV=1	24.5	9	0.003	4	0.14	0.05	0.27	0.05	0.518519	0.27	0.03	0.26	0.05	DLEEEAAGR+DLEEEAAGRSDSEMSASVSGDR+DLEEEAAGRSDSEMSASVSGDRSPR+EERGGLPATEGR+GGLPATEGR+GGLPATEGRSVPGGTAVAVASAPAVCCWR+KEERGGLPATEGR+QMAADLLASAPAAK+QMAADLLASAPAAKK+QMAADLLASAPAAKKVAVK+VAVKVLVR
5163	tr|E1B714|E1B714_BOVIN tr|L8J2G6|L8J2G6_9CETA tr|M5FK80|M5FK80_BOVIN	1	Axin-1-like isoform 2 OS=Bos taurus GN=AXIN1 PE=4 SV=2;Axin-1 OS=Bos mutus GN=M91_08808 PE=4 SV=1;Axin-1-like isoform 1 OS=Bos taurus GN=AXIN1 PE=4 SV=1	17.3	8	0.004	6	0.21	0.03	0.29	0.02	0.724138	0.19	0.01	0.3	0.02	ASSSRRYSEGR+EMQESVQANGRVPLPHIPR+EPAEAEAAR+EPAEAEAARR+GAGIKGETSTATPR+IMQWIIEGEKEISR+LCSDQSSGSGTGK+LLLETAAPR+LLLETAAPRASSSR+SHVESTGAPPAGGDGLAYGGK+SSVQPSHLFIQDPTMPPNPAPNPLTQLEEARRR
5164	tr|E1B715|E1B715_BOVIN tr|L8HLY1|L8HLY1_9CETA	1	Kinesin-like protein OS=Bos taurus GN=KIF9 PE=3 SV=1;Kinesin-like protein (Fragment) OS=Bos mutus GN=M91_13697 PE=3 SV=1	26.8	16	0.005	6	0.18	0.03	0.23	0.04	0.782609	0.14	0.03	0.38	0.03	DGDVKDMVVR+DGDVKDMVVRDR+DVVSQALNGFNGTIMCYGQTGAGK+EGASSPLSGK+EIDMTKEALNLQKSLR+ELALLKQELAIHDSLANR+EQLSSSAR+EQLSSSARKEGASSPLSGK+INLVDLAGSERLGK+KEGASSPLSGK+LDLLNLR+MIEERPTHAITVR+MKLVTTEPTVNEK+MKLVTTEPTVNEKYDAER+QELAIHDSLANRTLVNYDPMDEIQIAEINSQVR+QELAIHDSLANRTLVNYDPMDEIQIAEINSQVRR+QIQEVFNQFR+QYRTEYQDLR+SEGRVLKEATYINK+TEYQDLR+VVLSQQEQEVESTLRR
5165	tr|E1B729|E1B729_BOVIN	1	Sulfotransferase OS=Bos taurus GN=HS3ST6 PE=3 SV=1	41.2	11	0.003	3	0.2	0.09	0.3	0.09	0.666667	0.1	0.02	0.34	0.05	ASRSPREPGLPVASGSGR+EAPRRIHSMSPATK+EPGLPVASGSGR+EPGLPVASGSGRR+EPGLPVASGSGRRR+GFPCLKKAQGSGRPR+GGTRALLEFLRLHPDIR+GRPHPRVPESVVQR+IHSMSPATKLIVVVR+LVSDPAGELGR+MAGSGGLAGGAGGSQGTAGGPGTALR+MAGSGGLAGGAGGSQGTAGGPGTALRASR+TKGFPCLKK+VPAPAPARAEPPRASR
5166	tr|E1B740|E1B740_BOVIN tr|E1BCK9|E1BCK9_BOVIN	1	Uncharacterized protein OS=Bos taurus GN=SNAPC4 PE=4 SV=2;Uncharacterized protein OS=Bos taurus GN=SNAPC4 PE=4 SV=2	20.8	24	0.006	8	0.14	0.04	0.26	0.05	0.538462	0.21	0.03	0.27	0.03	AAQGIKAFTELLVTKWK+AAQGPAVLSAR+ARRAAQGPAVLSAR+DLEHGAAVLAPGGPAGALQASLGR+EKLAEVSLLLAQNR+GGGNISKLWR+GGGNISKLWRAGSLLLR+GPQACCTASMPR+ISNVNFEGGR+KFWQNHEHPSINK+LDSHDWDKISNVNFEGGR+LEYLQQKQSR+LHDSPAYLLLR+LHDSPAYLLLRARFLAAFTLPALLATLSPR+LLQAVAKYGEQDWFK+LRQPHPPGSAPGLSPGGGSRDEARPR+LVQAMRVGSHIPYR+QEWSEQEVAQLKAVAAK+QGHALQRR+TVHSRGGGNISK+TVHSRGGGNISKLWR+TWEKVLLR+TWEKVLLRK+VGSHIPYRR+VQPQWARTAQRR
5167	tr|E1B741|E1B741_BOVIN tr|L8I2Y8|L8I2Y8_9CETA	1	Uncharacterized protein OS=Bos taurus GN=MYSM1 PE=4 SV=1;Histone H2A deubiquitinase MYSM1 OS=Bos mutus GN=M91_03913 PE=4 SV=1	30.3	25	0.008	8	0.14	0.03	0.33	0.01	0.424242	0.22	0.02	0.27	0.03	DIDTQAKYQSYFSR+DLSSVLLLDISNNK+DSDLTCLQKLLECLR+ELFEQGLAKFGRR+ETPNQKNSSGFQMK+GGAKFIGMIVSPYNR+IAKLIESR+IMVHTPTKPASYSVK+IRNYILDQWEICKPK+KDTVEAYQLAQR+LIESRTVLQVK+LIESRTVLQVKSYAR+LMKNCDKHHGNGITDDAR+LPYKFEVQQMLEEPR+MLLEEEYYLSNK+NCDKHHGNGITDDAR+NCGDVNCIGR+NEDEGTKAWTPSGLR+NIIQEEEKQAIPEFFEGR+NSSGFQMKNEDEGTKAWTPSGLR+TENGLIPWTLDSTISEENR+YQSYFSRGGAKFIGMIVSPYNR
5168	tr|E1B748|E1B748_BOVIN tr|L8IGR8|L8IGR8_9CETA	1	Uncharacterized protein OS=Bos taurus GN=HYOU1 PE=1 SV=1;Hypoxia up-regulated protein 1 OS=Bos mutus GN=M91_09718 PE=3 SV=1	17.1	12	0.005	7	0.17	0.02	0.32	0.02	0.53125	0.15	0.02	0.33	0.02	AVGKEELGK+DAGIQPQLQIR+DEPGEQAELK+ENGTDTVQEEEEGPAEGSK+FFGDSAASMAIKNPK+HNKRVLFSR+LCHGLFFRVEER+LSATSTWLEDEGFGATTAMLK+NTTVAEQAK+QENNPHVALYKAR+TLGGLEMELRLR+VLFSRMGPYPQRK+VQEVLLKAVGKEELGK+VTRAEFEELCADLFER
5169	tr|E1B760|E1B760_BOVIN tr|L8IHC2|L8IHC2_9CETA	1	Uncharacterized protein OS=Bos taurus GN=KCNH3 PE=4 SV=1;Potassium voltage-gated channel subfamily H member 3 OS=Bos mutus GN=M91_03116 PE=4 SV=1	19.4	36	0.01	17	0.17	0.01	0.31	0.01	0.548387	0.18	0.01	0.33	0.01	ADIAMHLHKEVLQLPLFEAASR+AELILYR+EFKAELILYR+GDLIGCELPR+GGPDSWKESGGGR+GGPDSWKESGGGRR+GGTVLAILGK+GVFGEKPNLPEYKVAAIR+IHRIPKPLK+LETPYYLVGR+LGGRGRPGR+LLPRLDR+LNKGVFGEKPNLPEYKVAAIR+LRQAVMELSEQVLQMREGLQSLR+NEKGEVALFLVSHK+NRGGPDSWK+NRGGPDSWKESGGGR+NTDTLDKLR+QAVMELSEQVLQMREGLQSLR+QAVQLVLAPR+SGQVVFAPK+TGPELLGGPSLR+TRDLRDYIR
5170	tr|E1B783|E1B783_BOVIN tr|L8IUJ6|L8IUJ6_9CETA	1	Uncharacterized protein OS=Bos taurus GN=TTC13 PE=4 SV=1;Tetratricopeptide repeat protein 13 (Fragment) OS=Bos mutus GN=M91_14830 PE=4 SV=1	23.1	28	0.007	9	0.15	0.02	0.27	0.02	0.555556	0.22	0.01	0.35	0.01	EVAGKIPKGK+GKLVDFEAMTAPGSEAFSK+GSSVIAYSVIVGALMASGK+GSSVIAYSVIVGALMASGKEVAGK+INEAVNDLTKAIQLQPSAR+LGSLMQYETPGFLPNKR+LGSLMQYETPGFLPNKRIHR+LMQWRDMFDIAVK+LVDFEAMTAPGSEAFSK+NQPIAMLYKGLTFFHR+SISPSYKTLPSVSETFPTLR+SMIEVLNTDSSPR+SWMNLKSISPSYK+TKDGFTVNTK+TKDGFTVNTKVPSLK+TRLMQWR+TRLMQWRDMFDIAVK+TWTNSKVR
[truncated: 11,057 more rows]

## Sheet: final list
entry no.	protein	Uniprot ID	Gene Name	Protein Name	protein probability	protein description	percent coverage	tot indep spectra	percent share of spectrum ids	LIBRA number peptides	LIBRA 1 ratio	LIBRA 2 ratio	LIBRA 3 ratio	LIBRA 4 ratio	peptides
[truncated: 8,694 more rows]

## Sheet: Full GO information
SwissProt Accession Number	Uniprot ID	Name	Primary Gene Name	Taxonomy	Length	Function	Catalytic Activity	UniprotUrl	GO:Biological Process	GO:Cellular Component	GO:Molecular Function	GOBP_Biological regulation	GOBP_Cellular process	GOBP_Developmental process	GOBP_Growth	GOBP_Immune system process	GOBP_Interaction with cells and organisms	GOBP_Localization	GOBP_Metabolic process	GOBP_Regulation	GOBP_Reproduction	GOBP_Response to stimulus	GOBP_Other	GOCC_Endosome	GOCC_Chromosome	GOCC_Ribosome	GOCC_Golgi	GOCC_ER	GOCC_Mitochondria	GOCC_Nucleus	GOCC_Peroxisome/microbody	GOCC_Cytoskeleton	GOCC_Plasma membrane	GOCC_Cell surface	GOCC_Extracellular	GOCC_Other intracellular organelles	GOCC_Other cytoplasmic vesicle	GOCC_Macromolecular complex	GOCC_Cytoplasm	GOCC_Other	GOMF_Antioxidant Activity	GOMF_Binding	GOMF_Catalytic Activity	GOMF_Enzyme regulator activity	GOMF_Molecular transducer activity	GOMF_Structural molecule activity	GOMF_Transcription regulator activity	GOMF_Translation regulator activity	GOMF_Transporter activity
[truncated: 8,694 more rows]
[truncated: 3 more columns]

[truncated: 6 more sheets: All normalize used for vol plot, lesser than 0.66, greater than 1.5, Vol plot significant data, Channels proteins, Sheet1]
