# Supplementary material for: Transcriptional Repression of MFG-E8 Causes Disturbance in the Homeostasis of Cell Cycle Through DOCK/ZP4/STAT Signaling in Buffalo Mammary Epithelial Cells
Source: Front Cell Dev Biol. 2021 Apr 1;9:568660. doi: 10.3389/fcell.2021.568660 (PMC8047144; doi:10.3389/fcell.2021.568660)
Supplement: Supplementary Table 3 — The resulted list of DAVID (the database for annotation, visualization, and integrated discovery) Functional Annotation Tool and typical protein-term enrichment analysis. [file Table_3.XLSX]

## Sheet: Functional Annotation Table
ID	Gene Name	Species	COG_ONTOLOGY	GOTERM_BP_DIRECT	GOTERM_CC_DIRECT	GOTERM_MF_DIRECT	INTERPRO	KEGG_PATHWAY	PIR_SUPERFAMILY	SMART	UP_KEYWORDS	UP_SEQ_FEATURE
Q95JH2	1-acylglycerol-3-phosphate O-acyltransferase 1(AGPAT1)	Bos taurus		GO:0001819~positive regulation of cytokine production,GO:0006654~phosphatidic acid biosynthetic process,GO:0016024~CDP-diacylglycerol biosynthetic process,GO:0046474~glycerophospholipid biosynthetic process,	GO:0005789~endoplasmic reticulum membrane,GO:0016021~integral component of membrane,	GO:0003841~1-acylglycerol-3-phosphate O-acyltransferase activity,	IPR002123:Phospholipid/glycerol acyltransferase,IPR004552:1-acyl-sn-glycerol-3-phosphate acyltransferase,	bta00561:Glycerolipid metabolism,bta00564:Glycerophospholipid metabolism,bta01100:Metabolic pathways,bta04975:Fat digestion and absorption,		SM00563:PlsC,	Acyltransferase,Complete proteome,Endoplasmic reticulum,Lipid biosynthesis,Lipid metabolism,Membrane,Phospholipid biosynthesis,Phospholipid metabolism,Reference proteome,Signal,Transferase,Transmembrane,Transmembrane helix,	chain:1-acyl-sn-glycerol-3-phosphate acyltransferase alpha,sequence conflict,short sequence motif:HXXXXD motif,transmembrane region,
G5E5P6	1-acylglycerol-3-phosphate O-acyltransferase 3(AGPAT3)	Bos taurus		GO:0008152~metabolic process,	GO:0005783~endoplasmic reticulum,GO:0005886~plasma membrane,GO:0016021~integral component of membrane,	GO:0016746~transferase activity, transferring acyl groups,GO:0042171~lysophosphatidic acid acyltransferase activity,	IPR002123:Phospholipid/glycerol acyltransferase,	bta00561:Glycerolipid metabolism,bta00564:Glycerophospholipid metabolism,bta01100:Metabolic pathways,		SM00563:PlsC,	Acyltransferase,Complete proteome,Membrane,Reference proteome,Transferase,Transmembrane,Transmembrane helix,
Q5E9R2	1-acylglycerol-3-phosphate O-acyltransferase 4(AGPAT4)	Bos taurus		GO:0008152~metabolic process,GO:0016024~CDP-diacylglycerol biosynthetic process,	GO:0016021~integral component of membrane,	GO:0003841~1-acylglycerol-3-phosphate O-acyltransferase activity,GO:0016746~transferase activity, transferring acyl groups,	IPR002123:Phospholipid/glycerol acyltransferase,	bta00561:Glycerolipid metabolism,bta00564:Glycerophospholipid metabolism,bta01100:Metabolic pathways,		SM00563:PlsC,	Acyltransferase,Complete proteome,Lipid biosynthesis,Lipid metabolism,Membrane,Phospholipid biosynthesis,Phospholipid metabolism,Reference proteome,Transferase,Transmembrane,Transmembrane helix,	chain:1-acyl-sn-glycerol-3-phosphate acyltransferase delta,sequence conflict,short sequence motif:HXXXXD motif,transmembrane region,
Q5E9H2	1-aminocyclopropane-1-carboxylate synthase homolog (inactive)(ACCS)	Bos taurus		GO:0009058~biosynthetic process,		GO:0003824~catalytic activity,GO:0030170~pyridoxal phosphate binding,	IPR004839:Aminotransferase, class I/classII,IPR015421:Pyridoxal phosphate-dependent transferase, major region, subdomain 1,IPR015422:Pyridoxal phosphate-dependent transferase, major region, subdomain 2,IPR015424:Pyridoxal phosphate-dependent transferase,				Complete proteome,Pyridoxal phosphate,Reference proteome,	binding site:Substrate,chain:1-aminocyclopropane-1-carboxylate synthase-like protein 1,modified residue,
P06623	2',3'-cyclic nucleotide 3' phosphodiesterase(CNP)	Bos taurus		GO:0007409~axonogenesis,GO:0008344~adult locomotory behavior,GO:0009214~cyclic nucleotide catabolic process,GO:0009636~response to toxic substance,GO:0021762~substantia nigra development,GO:0048709~oligodendrocyte differentiation,	GO:0005615~extracellular space,GO:0005654~nucleoplasm,GO:0005737~cytoplasm,GO:0016020~membrane,GO:0042470~melanosome,GO:0043209~myelin sheath,GO:0070062~extracellular exosome,	GO:0003723~RNA binding,GO:0004113~2',3'-cyclic-nucleotide 3'-phosphodiesterase activity,	IPR008431:Cyclic nucleotide phosphodiesterase,IPR009097:RNA ligase/cyclic nucleotide phosphodiesterase,IPR027417:P-loop containing nucleoside triphosphate hydrolase,		PIRSF000970:2',3'-cyclic-nucleotide 3'-phosphodiesterase,		Complete proteome,Hydrolase,Lipoprotein,Membrane,Methylation,Phosphoprotein,Prenylation,Reference proteome,RNA-binding,	active site:Proton acceptor,active site:Proton donor,binding site:Substrate,chain:2',3'-cyclic-nucleotide 3'- phosphodiesterase,modified residue,
F1N6E0	2',5'-oligoadenylate synthetase 1, 40/46kDa(OAS1X)	Bos taurus		GO:0006955~immune response,GO:0051607~defense response to virus,		GO:0003725~double-stranded RNA binding,GO:0005524~ATP binding,GO:0016779~nucleotidyltransferase activity,	IPR002934:Nucleotidyl transferase domain,IPR006116:2-5-oligoadenylate synthetase, N-terminal,IPR006117:2-5-oligoadenylate synthetase, conserved site,IPR018952:2'-5'-oligoadenylate synthetase 1, domain 2/C-terminal,IPR026774:2'-5'-oligoadenylate synthase,	bta05160:Hepatitis C,bta05162:Measles,bta05164:Influenza A,bta05168:Herpes simplex infection,			Complete proteome,Reference proteome,
F1N3B8	2'-5'-oligoadenylate synthetase 2(OAS2)	Bos taurus		GO:0006401~RNA catabolic process,GO:0006486~protein glycosylation,GO:0009615~response to virus,GO:0018377~protein myristoylation,GO:0045087~innate immune response,GO:0051607~defense response to virus,	GO:0005634~nucleus,GO:0005739~mitochondrion,GO:0005783~endoplasmic reticulum,GO:0016020~membrane,GO:0048471~perinuclear region of cytoplasm,	GO:0001730~2'-5'-oligoadenylate synthetase activity,GO:0003725~double-stranded RNA binding,GO:0005524~ATP binding,GO:0046872~metal ion binding,	IPR002934:Nucleotidyl transferase domain,IPR006116:2-5-oligoadenylate synthetase, N-terminal,IPR006117:2-5-oligoadenylate synthetase, conserved site,IPR018952:2'-5'-oligoadenylate synthetase 1, domain 2/C-terminal,IPR026774:2'-5'-oligoadenylate synthase,	bta05160:Hepatitis C,bta05162:Measles,bta05164:Influenza A,bta05168:Herpes simplex infection,			Antiviral defense,ATP-binding,Complete proteome,Cytoplasm,Endoplasmic reticulum,Glycoprotein,Immunity,Innate immunity,Lipoprotein,Magnesium,Metal-binding,Microsome,Mitochondrion,Myristate,Nucleotide-binding,Nucleotidyltransferase,Nucleus,Reference proteome,Repeat,RNA-binding,Transferase,
G3X8F5	2-acylglycerol O-acyltransferase 2(LOC785379)	Bos taurus			GO:0016021~integral component of membrane,	GO:0016747~transferase activity, transferring acyl groups other than amino-acyl groups,	IPR007130:Diacylglycerol acyltransferase,	bta00561:Glycerolipid metabolism,bta04975:Fat digestion and absorption,			Complete proteome,Membrane,Reference proteome,Transmembrane,Transmembrane helix,
G3MZK0	2-aminoethanethiol dioxygenase(ADO)	Bos taurus		GO:0055114~oxidation-reduction process,	GO:0005739~mitochondrion,	GO:0016702~oxidoreductase activity, acting on single donors with incorporation of molecular oxygen, incorporation of two atoms of oxygen,	IPR011051:RmlC-like cupin domain,IPR012864:Cysteamine dioxygenase,IPR014710:RmlC-like jelly roll fold,	bta00430:Taurine and hypotaurine metabolism,bta01100:Metabolic pathways,			Complete proteome,Reference proteome,
F1MVP8	2-hydroxyacyl-CoA lyase 1(HACL1)	Bos taurus		GO:0001561~fatty acid alpha-oxidation,GO:0051259~protein oligomerization,	GO:0005777~peroxisome,	GO:0000287~magnesium ion binding,GO:0003824~catalytic activity,GO:0016830~carbon-carbon lyase activity,GO:0030976~thiamine pyrophosphate binding,	IPR011766:Thiamine pyrophosphate enzyme, C-terminal TPP-binding,IPR012000:Thiamine pyrophosphate enzyme, central domain,IPR012001:Thiamine pyrophosphate enzyme, N-terminal TPP-binding domain,	bta04146:Peroxisome,			Complete proteome,Proteomics identification,Reference proteome,Thiamine pyrophosphate,
A6QR14	24-dehydrocholesterol reductase(DHCR24)	Bos taurus	Energy production and conversion,	GO:0006695~cholesterol biosynthetic process,GO:0006979~response to oxidative stress,GO:0008104~protein localization,GO:0008202~steroid metabolic process,GO:0009888~tissue development,GO:0030539~male genitalia development,GO:0031639~plasminogen activation,GO:0042987~amyloid precursor protein catabolic process,GO:0043154~negative regulation of cysteine-type endopeptidase activity involved in apopto…	GO:0005634~nucleus,GO:0005783~endoplasmic reticulum,GO:0016021~integral component of membrane,	GO:0000246~delta24(24-1) sterol reductase activity,GO:0016614~oxidoreductase activity, acting on CH-OH group of donors,GO:0042605~peptide antigen binding,GO:0050614~delta24-sterol reductase activity,GO:0050660~flavin adenine dinucleotide binding,	IPR006094:FAD linked oxidase, N-terminal,IPR016166:FAD-binding, type 2,IPR016169:CO dehydrogenase flavoprotein-like, FAD-binding, subdomain 2,	bta00100:Steroid biosynthesis,bta01100:Metabolic pathways,			Complete proteome,Membrane,Reference proteome,Transmembrane,Transmembrane helix,
A7Z064	3-hydroxy-3-methylglutaryl-CoA reductase(HMGCR)	Bos taurus		GO:0006695~cholesterol biosynthetic process,GO:0008299~isoprenoid biosynthetic process,GO:0008542~visual learning,GO:0015936~coenzyme A metabolic process,GO:0016126~sterol biosynthetic process,GO:0043407~negative regulation of MAP kinase activity,GO:0051262~protein tetramerization,GO:0055114~oxidation-reduction process,	GO:0005778~peroxisomal membrane,GO:0005789~endoplasmic reticulum membrane,GO:0016021~integral component of membrane,	GO:0004420~hydroxymethylglutaryl-CoA reductase (NADPH) activity,GO:0042282~hydroxymethylglutaryl-CoA reductase activity,GO:0070402~NADPH binding,	IPR000731:Sterol-sensing domain,IPR002202:Hydroxymethylglutaryl-CoA reductase, class I/II,IPR004554:Hydroxymethylglutaryl-CoA reductase, eukaryotic/arcaheal type,IPR004816:Hydroxymethylglutaryl-CoA reductase, metazoan,IPR009023:Hydroxymethylglutaryl-CoA reductase, class I/II, NAD/NADP-binding,IPR009029:Hydroxymethylglutaryl-CoA reductase, class I/II, substrate-binding,IPR023074:Hydroxymethylgluta…	bta00900:Terpenoid backbone biosynthesis,bta01100:Metabolic pathways,bta01130:Biosynthesis of antibiotics,bta04152:AMPK signaling pathway,bta04976:Bile secretion,			Cholesterol biosynthesis,Cholesterol metabolism,Complete proteome,Endoplasmic reticulum,Glycoprotein,Isopeptide bond,Lipid biosynthesis,Lipid metabolism,Membrane,NADP,Oxidoreductase,Phosphoprotein,Reference proteome,Steroid biosynthesis,Steroid metabolism,Sterol biosynthesis,Sterol metabolism,Transmembrane,Transmembrane helix,Ubl conjugation,
Q2KIE6	3-hydroxy-3-methylglutaryl-CoA synthase 2(HMGCS2)	Bos taurus		GO:0006695~cholesterol biosynthetic process,GO:0008299~isoprenoid biosynthetic process,	GO:0005743~mitochondrial inner membrane,	GO:0004421~hydroxymethylglutaryl-CoA synthase activity,	IPR000590:Hydroxymethylglutaryl-coenzyme A synthase, active site,IPR010122:Hydroxymethylglutaryl-CoA synthase, eukaryotic,IPR013528:Hydroxymethylglutaryl-coenzyme A synthase, N-terminal,IPR013746:Hydroxymethylglutaryl-coenzyme A synthase C-terminal,IPR016039:Thiolase-like,	bta00072:Synthesis and degradation of ketone bodies,bta00280:Valine, leucine and isoleucine degradation,bta00650:Butanoate metabolism,bta00900:Terpenoid backbone biosynthesis,bta01100:Metabolic pathways,bta01130:Biosynthesis of antibiotics,			Acetylation,Cholesterol biosynthesis,Cholesterol metabolism,Complete proteome,Lipid biosynthesis,Lipid metabolism,Mitochondrion,Phosphoprotein,Reference proteome,Steroid biosynthesis,Steroid metabolism,Sterol biosynthesis,Sterol metabolism,Transferase,Transit peptide,	chain:Hydroxymethylglutaryl-CoA synthase, mitochondrial,modified residue,transit peptide:Mitochondrion,
F1MXJ1	3-hydroxyacyl-CoA dehydratase 1(HACD1)	Bos taurus		GO:0030148~sphingolipid biosynthetic process,GO:0030497~fatty acid elongation,GO:0042761~very long-chain fatty acid biosynthetic process,	GO:0030176~integral component of endoplasmic reticulum membrane,	GO:0018812~3-hydroxyacyl-CoA dehydratase activity,GO:0080023~3R-hydroxyacyl-CoA dehydratase activity,	IPR007482:Protein-tyrosine phosphatase-like, PTPLA,	bta00062:Fatty acid elongation,bta01040:Biosynthesis of unsaturated fatty acids,bta01212:Fatty acid metabolism,			Complete proteome,Membrane,Reference proteome,Transmembrane,Transmembrane helix,
Q02337	3-hydroxybutyrate dehydrogenase, type 1(BDH1)	Bos taurus		GO:0055114~oxidation-reduction process,	GO:0005654~nucleoplasm,GO:0005759~mitochondrial matrix,GO:0099617~matrix side of mitochondrial inner membrane,	GO:0003858~3-hydroxybutyrate dehydrogenase activity,	IPR002347:Glucose/ribitol dehydrogenase,IPR016040:NAD(P)-binding domain,IPR020904:Short-chain dehydrogenase/reductase, conserved site,	bta00072:Synthesis and degradation of ketone bodies,bta00650:Butanoate metabolism,bta01100:Metabolic pathways,			Acetylation,Allosteric enzyme,Complete proteome,Direct protein sequencing,Glycoprotein,Membrane,Mitochondrion,Mitochondrion inner membrane,NAD,Oxidoreductase,Phosphoprotein,Reference proteome,Transit peptide,	active site:Proton acceptor,binding site:Substrate,chain:D-beta-hydroxybutyrate dehydrogenase, mitochondrial,modified residue,nucleotide phosphate-binding region:NAD,transit peptide:Mitochondrion,
Q3T046	3-hydroxybutyrate dehydrogenase, type 2(BDH2)	Bos taurus		GO:0006635~fatty acid beta-oxidation,GO:0019290~siderophore biosynthetic process,GO:0030855~epithelial cell differentiation,GO:0042168~heme metabolic process,GO:0055072~iron ion homeostasis,GO:0055114~oxidation-reduction process,	GO:0005737~cytoplasm,GO:0070062~extracellular exosome,	GO:0003858~3-hydroxybutyrate dehydrogenase activity,GO:0016628~oxidoreductase activity, acting on the CH-CH group of donors, NAD or NADP as acceptor,GO:0051287~NAD binding,	IPR002347:Glucose/ribitol dehydrogenase,IPR016040:NAD(P)-binding domain,IPR020904:Short-chain dehydrogenase/reductase, conserved site,	bta00072:Synthesis and degradation of ketone bodies,bta00650:Butanoate metabolism,bta01100:Metabolic pathways,			Complete proteome,Cytoplasm,NAD,Oxidoreductase,Reference proteome,	active site:Proton acceptor,binding site:NAD,binding site:Substrate,chain:3-hydroxybutyrate dehydrogenase type 2,modified residue,nucleotide phosphate-binding region:NAD,
Q2HJD7	3-hydroxyisobutyrate dehydrogenase(HIBADH)	Bos taurus		GO:0006574~valine catabolic process,GO:0009083~branched-chain amino acid catabolic process,GO:0055114~oxidation-reduction process,	GO:0005739~mitochondrion,	GO:0004616~phosphogluconate dehydrogenase (decarboxylating) activity,GO:0008442~3-hydroxyisobutyrate dehydrogenase activity,GO:0051287~NAD binding,	IPR006115:6-phosphogluconate dehydrogenase, NADP-binding,IPR008927:6-phosphogluconate dehydrogenase, C-terminal-like,IPR011548:3-hydroxyisobutyrate dehydrogenase,IPR013328:Dehydrogenase, multihelical,IPR015815:Hydroxy monocarboxylic acid anion dehydrogenase, HIBADH-type,IPR016040:NAD(P)-binding domain,	bta00280:Valine, leucine and isoleucine degradation,bta01100:Metabolic pathways,	PIRSF000103:hydroxy monocarboxylic acid anion dehydrogenase, HIBADH type,		Acetylation,Branched-chain amino acid catabolism,Complete proteome,Mitochondrion,NAD,Oxidoreductase,Reference proteome,Transit peptide,	binding site:NAD,binding site:NAD; via amide nitrogen,chain:3-hydroxyisobutyrate dehydrogenase, mitochondrial,nucleotide phosphate-binding region:NAD,transit peptide:Mitochondrion,
Q2HJ73	3-hydroxyisobutyryl-CoA hydrolase(HIBCH)	Bos taurus		GO:0006574~valine catabolic process,GO:0006635~fatty acid beta-oxidation,GO:0009083~branched-chain amino acid catabolic process,	GO:0005739~mitochondrion,GO:0070062~extracellular exosome,	GO:0003860~3-hydroxyisobutyryl-CoA hydrolase activity,	IPR014748:Crontonase, C-terminal,	bta00280:Valine, leucine and isoleucine degradation,bta00410:beta-Alanine metabolism,bta00640:Propanoate metabolism,bta01100:Metabolic pathways,bta01200:Carbon metabolism,			Acetylation,Branched-chain amino acid catabolism,Complete proteome,Hydrolase,Mitochondrion,Phosphoprotein,Proteomics identification,Reference proteome,Transit peptide,	binding site:Substrate,binding site:Substrate; via amide nitrogen,chain:3-hydroxyisobutyryl-CoA hydrolase, mitochondrial,modified residue,transit peptide:Mitochondrion,
E1BK37	3-hydroxymethyl-3-methylglutaryl-CoA lyase like 1(HMGCLL1)	Bos taurus		GO:0046951~ketone body biosynthetic process,	GO:0005783~endoplasmic reticulum,GO:0005829~cytosol,GO:0016020~membrane,GO:0048471~perinuclear region of cytoplasm,	GO:0004419~hydroxymethylglutaryl-CoA lyase activity,	IPR000891:Pyruvate carboxyltransferase,IPR013785:Aldolase-type TIM barrel,	bta00072:Synthesis and degradation of ketone bodies,bta00280:Valine, leucine and isoleucine degradation,bta00650:Butanoate metabolism,bta01100:Metabolic pathways,bta04146:Peroxisome,			Complete proteome,Reference proteome,
Q24JZ7	3-oxoacid CoA-transferase 1(OXCT1)	Bos taurus	Lipid metabolism,	GO:0042182~ketone catabolic process,GO:0046950~cellular ketone body metabolic process,GO:0046952~ketone body catabolic process,	GO:0005739~mitochondrion,	GO:0008260~3-oxoacid CoA-transferase activity,	IPR004163:Coenzyme A transferase binding site,IPR004164:Coenzyme A transferase active site,IPR004165:Coenzyme A transferase family I,IPR012791:3-oxoacid CoA-transferase, subunit B,IPR012792:3-oxoacid CoA-transferase, subunit A,IPR014388:3-oxoacid CoA-transferase,	bta00072:Synthesis and degradation of ketone bodies,bta00280:Valine, leucine and isoleucine degradation,bta00650:Butanoate metabolism,	PIRSF000858:3-oxoacid CoA-transferase,	SM00882:SM00882,	Complete proteome,Mitochondrion,Proteomics identification,Reference proteome,Transferase,
A1A4K9	3-oxoacid CoA-transferase 2(OXCT2)	Bos taurus	Lipid metabolism,	GO:0046952~ketone body catabolic process,	GO:0005739~mitochondrion,	GO:0008260~3-oxoacid CoA-transferase activity,	IPR004163:Coenzyme A transferase binding site,IPR004164:Coenzyme A transferase active site,IPR004165:Coenzyme A transferase family I,IPR012791:3-oxoacid CoA-transferase, subunit B,IPR012792:3-oxoacid CoA-transferase, subunit A,IPR014388:3-oxoacid CoA-transferase,	bta00072:Synthesis and degradation of ketone bodies,bta00280:Valine, leucine and isoleucine degradation,bta00650:Butanoate metabolism,	PIRSF000858:3-oxoacid CoA-transferase,	SM00882:SM00882,	Mitochondrion,Transferase,
M5FMV3	3-phosphoinositide dependent protein kinase 1(PDPK1)	Bos taurus		GO:0003323~type B pancreatic cell development,GO:0006469~negative regulation of protein kinase activity,GO:0006972~hyperosmotic response,GO:0007173~epidermal growth factor receptor signaling pathway,GO:0010518~positive regulation of phospholipase activity,GO:0010594~regulation of endothelial cell migration,GO:0010667~negative regulation of cardiac muscle cell apoptotic process,GO:0016477~cell mig…	GO:0005622~intracellular,GO:0005886~plasma membrane,GO:0016023~cytoplasmic, membrane-bounded vesicle,GO:0042995~cell projection,	GO:0004672~protein kinase activity,GO:0004674~protein serine/threonine kinase activity,GO:0004676~3-phosphoinositide-dependent protein kinase activity,GO:0005524~ATP binding,GO:0016004~phospholipase activator activity,	IPR000719:Protein kinase, catalytic domain,IPR008271:Serine/threonine-protein kinase, active site,IPR011009:Protein kinase-like domain,IPR011993:Pleckstrin homology-like domain,IPR017441:Protein kinase, ATP binding site,	bta03320:PPAR signaling pathway,bta04068:FoxO signaling pathway,bta04071:Sphingolipid signaling pathway,bta04150:mTOR signaling pathway,bta04151:PI3K-Akt signaling pathway,bta04152:AMPK signaling pathway,bta04510:Focal adhesion,bta04660:T cell receptor signaling pathway,bta04664:Fc epsilon RI signaling pathway,bta04722:Neurotrophin signaling pathway,bta04910:Insulin signaling pathway,bta04919:Thy…		SM00220:S_TKc,	Complete proteome,Kinase,Reference proteome,Transferase,
A2VDK2	4-aminobutyrate aminotransferase(ABAT)	Bos taurus		GO:0009448~gamma-aminobutyric acid metabolic process,GO:0009450~gamma-aminobutyric acid catabolic process,GO:0042135~neurotransmitter catabolic process,GO:0048148~behavioral response to cocaine,	GO:0005739~mitochondrion,GO:0005759~mitochondrial matrix,GO:0032144~4-aminobutyrate transaminase complex,GO:0043234~protein complex,GO:0070062~extracellular exosome,	GO:0003867~4-aminobutyrate transaminase activity,GO:0030170~pyridoxal phosphate binding,GO:0042803~protein homodimerization activity,GO:0046872~metal ion binding,GO:0047298~(S)-3-amino-2-methylpropionate transaminase activity,GO:0051536~iron-sulfur cluster binding,	IPR004631:4-aminobutyrate aminotransferase, eukaryotic,IPR005814:Aminotransferase class-III,IPR015421:Pyridoxal phosphate-dependent transferase, major region, subdomain 1,IPR015422:Pyridoxal phosphate-dependent transferase, major region, subdomain 2,IPR015424:Pyridoxal phosphate-dependent transferase,	bta00250:Alanine, aspartate and glutamate metabolism,bta00280:Valine, leucine and isoleucine degradation,bta00410:beta-Alanine metabolism,bta00640:Propanoate metabolism,bta00650:Butanoate metabolism,bta01100:Metabolic pathways,bta04727:GABAergic synapse,	PIRSF000521:4-aminobutyrate/lysine/ornithine transaminase,		Acetylation,Aminotransferase,Complete proteome,Disulfide bond,Iron,Iron-sulfur,Metal-binding,Mitochondrion,Neurotransmitter degradation,Pyridoxal phosphate,Reference proteome,Transferase,Transit peptide,	chain:4-aminobutyrate aminotransferase, mitochondrial,modified residue,transit peptide:Mitochondrion,
Q0P5I5	4-hydroxy-2-oxoglutarate aldolase 1(HOGA1)	Bos taurus	Amino acid transport and metabolism / Cell envelope biogenesis, outer membrane,	GO:0009436~glyoxylate catabolic process,GO:0019470~4-hydroxyproline catabolic process,GO:0033609~oxalate metabolic process,GO:0042866~pyruvate biosynthetic process,	GO:0005739~mitochondrion,GO:0070062~extracellular exosome,	GO:0008700~4-hydroxy-2-oxoglutarate aldolase activity,GO:0042803~protein homodimerization activity,	IPR002220:Dihydrodipicolinate synthetase-like,IPR013785:Aldolase-type TIM barrel,IPR020625:Dihydrodipicolinate synthetase, active site,	bta00330:Arginine and proline metabolism,bta00630:Glyoxylate and dicarboxylate metabolism,bta01100:Metabolic pathways,	PIRSF001365:dihydrodipicolinate synthase,	SM01130:SM01130,	Complete proteome,Direct protein sequencing,Lyase,Mitochondrion,Reference proteome,Schiff base,Transit peptide,	active site:Schiff-base intermediate with substrate,chain:Dihydrodipicolinate synthase-like, mitochondrial,region of interest:Substrate binding,sequence conflict,site:Involved in proton transfer during cleavage,transit peptide:Mitochondrion,
Q5EA20	4-hydroxyphenylpyruvate dioxygenase(HPD)	Bos taurus		GO:0006559~L-phenylalanine catabolic process,GO:0006572~tyrosine catabolic process,GO:0055114~oxidation-reduction process,		GO:0003868~4-hydroxyphenylpyruvate dioxygenase activity,GO:0046872~metal ion binding,	IPR004360:Glyoxalase/fosfomycin resistance/dioxygenase domain,IPR005956:4-hydroxyphenylpyruvate dioxygenase,	bta00130:Ubiquinone and other terpenoid-quinone biosynthesis,bta00350:Tyrosine metabolism,bta00360:Phenylalanine metabolism,bta01100:Metabolic pathways,	PIRSF009283:4-hydroxyphenylpyruvate dioxygenase,		Acetylation,Complete proteome,Dioxygenase,Iron,Metal-binding,Oxidoreductase,Phenylalanine catabolism,Phosphoprotein,Reference proteome,Tyrosine catabolism,	chain:4-hydroxyphenylpyruvate dioxygenase,metal ion-binding site:Iron,modified residue,
E1B8C1	5',3'-nucleotidase, mitochondrial(NT5M)	Bos taurus		GO:0046079~dUMP catabolic process,	GO:0005739~mitochondrion,	GO:0008253~5'-nucleotidase activity,	IPR010708:5'(3')-deoxyribonucleotidase,IPR023214:HAD-like domain,	bta00230:Purine metabolism,bta00240:Pyrimidine metabolism,bta00760:Nicotinate and nicotinamide metabolism,bta01100:Metabolic pathways,			Complete proteome,Reference proteome,
E1BMZ8	5'-3' exoribonuclease 1(XRN1)	Bos taurus	DNA replication, recombination, and repair / Cell division and chromosome partitioning / Translation,	GO:0016075~rRNA catabolic process,GO:0071028~nuclear mRNA surveillance,GO:0071044~histone mRNA catabolic process,	GO:0005634~nucleus,GO:0005794~Golgi apparatus,GO:0005886~plasma membrane,GO:0045111~intermediate filament cytoskeleton,	GO:0004527~exonuclease activity,GO:0044822~poly(A) RNA binding,	IPR004859:Putative 5-3 exonuclease,IPR027073:5'-3' exoribonuclease,	bta03008:Ribosome biogenesis in eukaryotes,bta03018:RNA degradation,			Complete proteome,Reference proteome,
F1MKX7	5'-3' exoribonuclease 2(XRN2)	Bos taurus	DNA replication, recombination, and repair / Cell division and chromosome partitioning / Translation,	GO:0000738~DNA catabolic process, exonucleolytic,GO:0007283~spermatogenesis,GO:0016049~cell growth,	GO:0005730~nucleolus,GO:0016020~membrane,GO:0016235~aggresome,	GO:0000175~3'-5'-exoribonuclease activity,GO:0001147~transcription termination site sequence-specific DNA binding,GO:0003676~nucleic acid binding,GO:0004527~exonuclease activity,GO:0004534~5'-3' exoribonuclease activity,GO:0044822~poly(A) RNA binding,	IPR004859:Putative 5-3 exonuclease,IPR017151:5'-3' exoribonuclease 2,IPR027073:5'-3' exoribonuclease,	bta03008:Ribosome biogenesis in eukaryotes,bta03018:RNA degradation,	PIRSF037239:5'-3' exonuclease, Xrn2 type,		Complete proteome,Reference proteome,
Q3ZC31	5'-aminolevulinate synthase 2(ALAS2)	Bos taurus	Posttranslational modification, protein turnover, chaperones,	GO:0001666~response to hypoxia,GO:0006782~protoporphyrinogen IX biosynthetic process,GO:0006879~cellular iron ion homeostasis,GO:0030218~erythrocyte differentiation,GO:0042541~hemoglobin biosynthetic process,	GO:0005743~mitochondrial inner membrane,GO:0005759~mitochondrial matrix,	GO:0003870~5-aminolevulinate synthase activity,GO:0030170~pyridoxal phosphate binding,	IPR001917:Aminotransferase, class-II, pyridoxal-phosphate binding site,IPR004839:Aminotransferase, class I/classII,IPR010961:Tetrapyrrole biosynthesis, 5-aminolevulinic acid synthase,IPR015118:5-aminolevulinate synthase presequence,IPR015421:Pyridoxal phosphate-dependent transferase, major region, subdomain 1,IPR015422:Pyridoxal phosphate-dependent transferase, major region, subdomain 2,IPR015424…	bta00260:Glycine, serine and threonine metabolism,bta00860:Porphyrin and chlorophyll metabolism,bta01100:Metabolic pathways,			Acyltransferase,Complete proteome,Heme biosynthesis,Mitochondrion,Pyridoxal phosphate,Reference proteome,Transferase,Transit peptide,	chain:5-aminolevulinate synthase, erythroid- specific, mitochondrial,modified residue,transit peptide:Mitochondrion,
E1BNI8	5'-nucleotidase domain containing 2(NT5DC2)	Bos taurus				GO:0008253~5'-nucleotidase activity,GO:0046872~metal ion binding,	IPR008380:HAD-superfamily hydrolase, subfamily IG, 5'-nucleotidase,IPR016695:Purine 5'-nucleotidase,IPR023214:HAD-like domain,		PIRSF017434:cytosolic purine 5'-nucleotidase,		Complete proteome,Magnesium,Metal-binding,Reference proteome,
F1MYW0	5'-nucleotidase domain containing 3(NT5DC3)	Bos taurus			GO:0005739~mitochondrion,GO:0005829~cytosol,GO:0043235~receptor complex,	GO:0008253~5'-nucleotidase activity,GO:0046872~metal ion binding,	IPR008380:HAD-superfamily hydrolase, subfamily IG, 5'-nucleotidase,IPR016695:Purine 5'-nucleotidase,IPR023214:HAD-like domain,		PIRSF017434:cytosolic purine 5'-nucleotidase,		Complete proteome,Magnesium,Metal-binding,Reference proteome,
Q05927	5'-nucleotidase ecto(NT5E)	Bos taurus	Nucleotide transport and metabolism,	GO:0009166~nucleotide catabolic process,GO:0016311~dephosphorylation,	GO:0005886~plasma membrane,GO:0031225~anchored component of membrane,	GO:0000166~nucleotide binding,GO:0008253~5'-nucleotidase activity,GO:0046872~metal ion binding,	IPR004843:Metallophosphoesterase domain,IPR006146:5'-Nucleotidase, conserved site,IPR006179:5'-Nucleotidase/apyrase,IPR008334:5'-Nucleotidase, C-terminal,	bta00230:Purine metabolism,bta00240:Pyrimidine metabolism,bta00760:Nicotinate and nicotinamide metabolism,bta01100:Metabolic pathways,			Cell membrane,Complete proteome,Direct protein sequencing,Disulfide bond,Glycoprotein,GPI-anchor,Hydrolase,Lipoprotein,Membrane,Metal-binding,Nucleotide-binding,Reference proteome,Signal,Zinc,	binding site:Substrate,chain:5'-nucleotidase,glycosylation site:N-linked (GlcNAc...),lipid moiety-binding region:GPI-anchor amidated serine,metal ion-binding site:Zinc 1,metal ion-binding site:Zinc 2,propeptide:Removed in mature form,region of interest:Substrate binding,sequence conflict,signal peptide,site:Transition state stabilizer,
E1BF39	5'-nucleotidase, cytosolic IA(NT5C1A)	Bos taurus		GO:0009117~nucleotide metabolic process,GO:0009128~purine nucleoside monophosphate catabolic process,	GO:0005829~cytosol,	GO:0000166~nucleotide binding,GO:0000287~magnesium ion binding,GO:0008253~5'-nucleotidase activity,	IPR010394:5-nucleotidase,	bta00230:Purine metabolism,bta00240:Pyrimidine metabolism,bta00760:Nicotinate and nicotinamide metabolism,bta01100:Metabolic pathways,			Complete proteome,Reference proteome,
O46411	5'-nucleotidase, cytosolic II(NT5C2)	Bos taurus		GO:0016311~dephosphorylation,GO:0046040~IMP metabolic process,GO:0046085~adenosine metabolic process,	GO:0005737~cytoplasm,	GO:0000166~nucleotide binding,GO:0008253~5'-nucleotidase activity,GO:0042802~identical protein binding,GO:0046872~metal ion binding,	IPR008380:HAD-superfamily hydrolase, subfamily IG, 5'-nucleotidase,IPR016695:Purine 5'-nucleotidase,IPR023214:HAD-like domain,	bta00230:Purine metabolism,bta00240:Pyrimidine metabolism,bta00760:Nicotinate and nicotinamide metabolism,bta01100:Metabolic pathways,	PIRSF017434:cytosolic purine 5'-nucleotidase,		Allosteric enzyme,Complete proteome,Cytoplasm,Hydrolase,Magnesium,Metal-binding,Nucleotide metabolism,Nucleotide-binding,Phosphoprotein,Reference proteome,	active site:Nucleophile,active site:Proton donor,binding site:Allosteric activator 1,binding site:Allosteric activator 1; via carbonyl oxygen,binding site:Allosteric activator 2,chain:Cytosolic purine 5'-nucleotidase,compositionally biased region:Asp/Glu-rich (acidic),metal ion-binding site:Magnesium,metal ion-binding site:Magnesium; via carbonyl oxygen,modified residue,region of interest:Substra…
Q0VCK0	5-aminoimidazole-4-carboxamide ribonucleotide formyltransferase/IMP cyclohydrolase(ATIC)	Bos taurus		GO:0006164~purine nucleotide biosynthetic process,GO:0006189~'de novo' IMP biosynthetic process,GO:0098609~cell-cell adhesion,	GO:0005739~mitochondrion,GO:0005913~cell-cell adherens junction,GO:0016020~membrane,GO:0070062~extracellular exosome,	GO:0003937~IMP cyclohydrolase activity,GO:0004643~phosphoribosylaminoimidazolecarboxamide formyltransferase activity,GO:0042803~protein homodimerization activity,GO:0098641~cadherin binding involved in cell-cell adhesion,	IPR002695:AICARFT/IMPCHase bienzyme,IPR011607:Methylglyoxal synthase-like domain,IPR016193:Cytidine deaminase-like,IPR024050:AICAR transformylase, insert domain,IPR024051:AICAR transformylase domain,	bta00230:Purine metabolism,bta00670:One carbon pool by folate,bta01100:Metabolic pathways,bta01130:Biosynthesis of antibiotics,	PIRSF000414:bifunctional purine biosynthesis protein, PurH type,	SM00798:AICARFT_IMPCHas,SM00851:SM00851,	Acetylation,Complete proteome,Hydrolase,Multifunctional enzyme,Purine biosynthesis,Reference proteome,Transferase,	active site:Proton acceptor,binding site:AICAR,binding site:AICAR; shared with dimeric partner,binding site:AICAR; via carbonyl oxygen,binding site:AICAR; via carbonyl oxygen; shared with dimeric partner,chain:Bifunctional purine biosynthesis protein PURH,modified residue,nucleotide phosphate-binding region:IMP,region of interest:AICAR binding,site:Transition state stabilizer,
Q3SYW5	5-azacytidine induced 2(AZI2)	Bos taurus		GO:0000278~mitotic cell cycle,GO:0007249~I-kappaB kinase/NF-kappaB signaling,GO:0032607~interferon-alpha production,GO:0032609~interferon-gamma production,GO:0032635~interleukin-6 production,GO:0032640~tumor necrosis factor production,GO:0042110~T cell activation,GO:0044565~dendritic cell proliferation,GO:0097028~dendritic cell differentiation,	GO:0005737~cytoplasm,		IPR024581:Tbk1/Ikki binding domain,	bta04622:RIG-I-like receptor signaling pathway,			Coiled coil,Complete proteome,Cytoplasm,Phosphoprotein,Reference proteome,	chain:5-azacytidine-induced protein 2,modified residue,region of interest:Interaction with TBK1,
G5E5J6	5-hydroxytryptamine (serotonin) receptor 3C, ionotropic(HTR3C)	Bos taurus		GO:0007210~serotonin receptor signaling pathway,	GO:0016021~integral component of membrane,	GO:0004993~G-protein coupled serotonin receptor activity,GO:0005232~serotonin-activated cation-selective channel activity,	IPR006029:Neurotransmitter-gated ion-channel transmembrane domain,IPR006201:Neurotransmitter-gated ion-channel,IPR006202:Neurotransmitter-gated ion-channel ligand-binding,IPR018000:Neurotransmitter-gated ion-channel, conserved site,IPR027361:Nicotinic acetylcholine-gated receptor, transmembrane domain,	bta04726:Serotonergic synapse,			Complete proteome,Ion channel,Ion transport,Membrane,Reference proteome,Signal,Transmembrane,Transmembrane helix,Transport,
E1BGY8	5-hydroxytryptamine receptor 5A(HTR5A)	Bos taurus		GO:0007198~adenylate cyclase-inhibiting serotonin receptor signaling pathway,GO:0007268~chemical synaptic transmission,GO:0019933~cAMP-mediated signaling,	GO:0005622~intracellular,GO:0005887~integral component of plasma membrane,GO:0030425~dendrite,	GO:0004993~G-protein coupled serotonin receptor activity,GO:0030594~neurotransmitter receptor activity,GO:0051378~serotonin binding,	IPR000276:G protein-coupled receptor, rhodopsin-like,IPR001397:5-Hydroxytryptamine 5A receptor,IPR002231:5-Hydroxytryptamine receptor family,IPR017452:GPCR, rhodopsin-like, 7TM,	bta04020:Calcium signaling pathway,bta04080:Neuroactive ligand-receptor interaction,bta04726:Serotonergic synapse,			Cell membrane,Complete proteome,Disulfide bond,G-protein coupled receptor,Membrane,Receptor,Reference proteome,Transducer,Transmembrane,Transmembrane helix,
E1BE22	5-hydroxytryptamine receptor 6(HTR6)	Bos taurus		GO:0007187~G-protein coupled receptor signaling pathway, coupled to cyclic nucleotide second messenger,GO:0007268~chemical synaptic transmission,GO:0021795~cerebral cortex cell migration,GO:0032008~positive regulation of TOR signaling,	GO:0005887~integral component of plasma membrane,GO:0005929~cilium,GO:0030425~dendrite,	GO:0004993~G-protein coupled serotonin receptor activity,GO:0030594~neurotransmitter receptor activity,	IPR000276:G protein-coupled receptor, rhodopsin-like,IPR017452:GPCR, rhodopsin-like, 7TM,	bta04020:Calcium signaling pathway,bta04024:cAMP signaling pathway,bta04080:Neuroactive ligand-receptor interaction,bta04726:Serotonergic synapse,		SM01381:SM01381,	Complete proteome,G-protein coupled receptor,Membrane,Receptor,Reference proteome,Transducer,Transmembrane,Transmembrane helix,
Q4JIJ3	5-methyltetrahydrofolate-homocysteine methyltransferase(MTR)	Bos taurus		GO:0009086~methionine biosynthetic process,GO:0009235~cobalamin metabolic process,GO:0032259~methylation,GO:0042558~pteridine-containing compound metabolic process,	GO:0005737~cytoplasm,GO:0005829~cytosol,	GO:0008270~zinc ion binding,GO:0008705~methionine synthase activity,GO:0008898~S-adenosylmethionine-homocysteine S-methyltransferase activity,GO:0031419~cobalamin binding,	IPR000489:Pterin-binding,IPR003726:Homocysteine S-methyltransferase,IPR003759:Cobalamin (vitamin B12)-binding module, cap domain,IPR004223:Vitamin B12-dependent methionine synthase, activation domain,IPR006158:Cobalamin (vitamin B12)-binding domain,IPR011005:Dihydropteroate synthase-like,IPR011822:5-methyltetrahydrofolate--homocysteine methyltransferase,	bta00270:Cysteine and methionine metabolism,bta00450:Selenocompound metabolism,bta00670:One carbon pool by folate,bta01100:Metabolic pathways,bta01230:Biosynthesis of amino acids,	PIRSF000381:cobalamin-dependent methionine synthase,	SM01018:SM01018,	Amino-acid biosynthesis,Cobalamin,Cobalt,Complete proteome,Cytoplasm,Metal-binding,Methionine biosynthesis,Methyltransferase,Phosphoprotein,Reference proteome,Repeat,S-adenosyl-L-methionine,Transferase,Zinc,	binding site:Cobalamin,binding site:Cobalamin; via carbonyl oxygen,binding site:S-adenosyl-L-methionine,binding site:S-adenosyl-L-methionine; via carbonyl oxygen,chain:Methionine synthase,domain:AdoMet activation,domain:B12-binding,domain:B12-binding N-terminal,domain:Hcy-binding,domain:Pterin-binding,metal ion-binding site:Cobalt (cobalamin axial ligand),metal ion-binding site:Zinc,region of int…
Q75WB5	5-oxoprolinase (ATP-hydrolysing)(OPLAH)	Bos taurus	Amino acid transport and metabolism / Secondary metabolites biosynthesis, transport, and catabolism,	GO:0006749~glutathione metabolic process,	GO:0005829~cytosol,	GO:0005524~ATP binding,GO:0016787~hydrolase activity,GO:0017168~5-oxoprolinase (ATP-hydrolyzing) activity,	IPR002821:Hydantoinase/oxoprolinase,IPR003692:Hydantoinase B/oxoprolinase,IPR008040:Hydantoinaseoxoprolinase, N-terminal,	bta00480:Glutathione metabolism,			ATP-binding,Complete proteome,Direct protein sequencing,Hydrolase,Nucleotide-binding,Phosphoprotein,Reference proteome,	chain:5-oxoprolinase,
E1B8R9	5-phosphohydroxy-L-lysine phospho-lyase(PHYKPL)	Bos taurus	Amino acid transport and metabolism,		GO:0005739~mitochondrion,	GO:0008483~transaminase activity,GO:0030170~pyridoxal phosphate binding,GO:0042802~identical protein binding,	IPR005814:Aminotransferase class-III,IPR015421:Pyridoxal phosphate-dependent transferase, major region, subdomain 1,IPR015422:Pyridoxal phosphate-dependent transferase, major region, subdomain 2,IPR015424:Pyridoxal phosphate-dependent transferase,	bta00310:Lysine degradation,bta01100:Metabolic pathways,			Complete proteome,Pyridoxal phosphate,Reference proteome,
P49872	6-phosphofructo-2-kinase/fructose-2,6-biphosphatase 1(PFKFB1)	Bos taurus		GO:0006000~fructose metabolic process,GO:0006003~fructose 2,6-bisphosphate metabolic process,GO:0016311~dephosphorylation,GO:0046835~carbohydrate phosphorylation,	GO:0043540~6-phosphofructo-2-kinase/fructose-2,6-biphosphatase complex,	GO:0003873~6-phosphofructo-2-kinase activity,GO:0004331~fructose-2,6-bisphosphate 2-phosphatase activity,GO:0005524~ATP binding,	IPR001345:Phosphoglycerate/bisphosphoglycerate mutase, active site,IPR003094:Fructose-2,6-bisphosphatase,IPR013078:Histidine phosphatase superfamily, clade-1,IPR013079:6-phosphofructo-2-kinase,IPR027417:P-loop containing nucleoside triphosphate hydrolase,	bta00051:Fructose and mannose metabolism,bta04152:AMPK signaling pathway,bta04922:Glucagon signaling pathway,		SM00855:SM00855,	Acetylation,ATP-binding,Complete proteome,Hydrolase,Kinase,Multifunctional enzyme,Nucleotide-binding,Phosphoprotein,Reference proteome,Transferase,	active site:Proton donor,active site:Tele-phosphohistidine intermediate,binding site:Fructose-6-phosphate,chain:6-phosphofructo-2-kinase/fructose-2,6- biphosphatase 1,modified residue,nucleotide phosphate-binding region:ATP,region of interest:6-phosphofructo-2-kinase,region of interest:Fructose-2,6-bisphosphatase,
P26285	6-phosphofructo-2-kinase/fructose-2,6-biphosphatase 2(PFKFB2)	Bos taurus		GO:0006000~fructose metabolic process,GO:0006003~fructose 2,6-bisphosphate metabolic process,GO:0006096~glycolytic process,GO:0016311~dephosphorylation,GO:0046835~carbohydrate phosphorylation,		GO:0003873~6-phosphofructo-2-kinase activity,GO:0004331~fructose-2,6-bisphosphate 2-phosphatase activity,GO:0005524~ATP binding,GO:0019901~protein kinase binding,	IPR001345:Phosphoglycerate/bisphosphoglycerate mutase, active site,IPR003094:Fructose-2,6-bisphosphatase,IPR013078:Histidine phosphatase superfamily, clade-1,IPR013079:6-phosphofructo-2-kinase,IPR027417:P-loop containing nucleoside triphosphate hydrolase,	bta00051:Fructose and mannose metabolism,bta04152:AMPK signaling pathway,bta04919:Thyroid hormone signaling pathway,		SM00855:SM00855,	Acetylation,ATP-binding,Complete proteome,Direct protein sequencing,Hydrolase,Kinase,Multifunctional enzyme,Nucleotide-binding,Phosphoprotein,Reference proteome,Transferase,	active site:Proton donor,active site:Tele-phosphohistidine intermediate,binding site:Fructose-6-phosphate,chain:6-phosphofructo-2-kinase/fructose-2,6- biphosphatase 2,modified residue,nucleotide phosphate-binding region:ATP,region of interest:6-phosphofructo-2-kinase,region of interest:Fructose-2,6-bisphosphatase,
A0JN55	6-phosphofructo-2-kinase/fructose-2,6-biphosphatase 3(PFKFB3)	Bos taurus		GO:0006000~fructose metabolic process,GO:0006003~fructose 2,6-bisphosphate metabolic process,GO:0016311~dephosphorylation,GO:0046835~carbohydrate phosphorylation,	GO:0005654~nucleoplasm,	GO:0003873~6-phosphofructo-2-kinase activity,GO:0004331~fructose-2,6-bisphosphate 2-phosphatase activity,GO:0005524~ATP binding,	IPR001345:Phosphoglycerate/bisphosphoglycerate mutase, active site,IPR003094:Fructose-2,6-bisphosphatase,IPR013078:Histidine phosphatase superfamily, clade-1,IPR013079:6-phosphofructo-2-kinase,IPR027417:P-loop containing nucleoside triphosphate hydrolase,	bta00051:Fructose and mannose metabolism,bta04066:HIF-1 signaling pathway,bta04152:AMPK signaling pathway,		SM00855:SM00855,	ATP-binding,Complete proteome,Hydrolase,Kinase,Multifunctional enzyme,Nucleotide-binding,Phosphoprotein,Reference proteome,Transferase,	active site:Proton donor,active site:Tele-phosphohistidine intermediate,binding site:Fructose-6-phosphate,chain:6-phosphofructo-2-kinase/fructose-2,6- biphosphatase 3,modified residue,nucleotide phosphate-binding region:ATP,region of interest:6-phosphofructo-2-kinase,region of interest:Fructose-2,6-bisphosphatase,
F1MGC8	6-phosphofructo-2-kinase/fructose-2,6-biphosphatase 4(PFKFB4)	Bos taurus		GO:0006000~fructose metabolic process,GO:0006003~fructose 2,6-bisphosphate metabolic process,		GO:0003873~6-phosphofructo-2-kinase activity,GO:0005524~ATP binding,	IPR001345:Phosphoglycerate/bisphosphoglycerate mutase, active site,IPR003094:Fructose-2,6-bisphosphatase,IPR013078:Histidine phosphatase superfamily, clade-1,IPR013079:6-phosphofructo-2-kinase,IPR027417:P-loop containing nucleoside triphosphate hydrolase,	bta00051:Fructose and mannose metabolism,bta04152:AMPK signaling pathway,		SM00855:SM00855,	Complete proteome,Reference proteome,
G5E6D6	60S ribosomal protein L21-like(LOC101902561)	Bos taurus		GO:0006412~translation,	GO:0022625~cytosolic large ribosomal subunit,	GO:0003735~structural constituent of ribosome,	IPR001147:Ribosomal protein L21e,IPR008991:Translation protein SH3-like domain,IPR018259:Ribosomal protein L21e, conserved site,				Complete proteome,Reference proteome,
A5D7T9	A-kinase anchoring protein 10(AKAP10)	Bos taurus		GO:0008104~protein localization,	GO:0005739~mitochondrion,GO:0005886~plasma membrane,	GO:0016301~kinase activity,	IPR016137:Regulator of G protein signalling superfamily,			SM00315:RGS,	Complete proteome,Kinase,Reference proteome,Transferase,
F1N388	A-kinase anchoring protein 11(AKAP11)	Bos taurus		GO:0010738~regulation of protein kinase A signaling,	GO:0005777~peroxisome,	GO:0051018~protein kinase A binding,	IPR008382:SPHK1-interactor/A-kinase anchor 110kDa,				Complete proteome,Reference proteome,
G3MWT9	A-kinase anchoring protein 12(AKAP12)	Bos taurus		GO:0006605~protein targeting,GO:0007165~signal transduction,GO:0010739~positive regulation of protein kinase A signaling,GO:0030819~positive regulation of cAMP biosynthetic process,GO:0090036~regulation of protein kinase C signaling,	GO:0005737~cytoplasm,GO:0005886~plasma membrane,GO:0005925~focal adhesion,		IPR001573:Protein kinase A anchoring, WSK motif,				Complete proteome,Proteomics identification,Reference proteome,
F1N1T3	A-kinase anchoring protein 2(AKAP2)	Bos taurus		GO:0007015~actin filament organization,GO:0007178~transmembrane receptor protein serine/threonine kinase signaling pathway,GO:0008104~protein localization,							Coiled coil,Complete proteome,Proteomics identification,Reference proteome,
O77797, F1MJS8	A-kinase anchoring protein 3(AKAP3)	Bos taurus		GO:0007178~transmembrane receptor protein serine/threonine kinase signaling pathway,GO:0008104~protein localization,GO:0010738~regulation of protein kinase A signaling,	GO:0001669~acrosomal vesicle,GO:0005634~nucleus,GO:0005737~cytoplasm,GO:0035686~sperm fibrous sheath,GO:0097228~sperm principal piece,	GO:0005515~protein binding,GO:0051018~protein kinase A binding,	IPR008382:SPHK1-interactor/A-kinase anchor 110kDa,IPR018292:A-kinase anchor 110kDa, C-terminal,IPR018459:RII binding domain,IPR020799:A-kinase anchor 110kDa,			SM00807:SM00807,	Complete proteome,Cytoplasmic vesicle,Phosphoprotein,Reference proteome,	chain:A-kinase anchor protein 3,modified residue,region of interest:PKA-RII subunit binding domain,sequence conflict,
F1MYH5	A-kinase anchoring protein 4(AKAP4)	Bos taurus		GO:0007178~transmembrane receptor protein serine/threonine kinase signaling pathway,GO:0010738~regulation of protein kinase A signaling,GO:0030317~sperm motility,GO:0044458~motile cilium assembly,GO:0045184~establishment of protein localization,	GO:0005634~nucleus,GO:0005737~cytoplasm,GO:0030018~Z disc,GO:0035686~sperm fibrous sheath,GO:0048471~perinuclear region of cytoplasm,GO:0097228~sperm principal piece,	GO:0051018~protein kinase A binding,	IPR008382:SPHK1-interactor/A-kinase anchor 110kDa,IPR018292:A-kinase anchor 110kDa, C-terminal,IPR018459:RII binding domain,IPR020799:A-kinase anchor 110kDa,			SM00807:SM00807,	Complete proteome,Reference proteome,
F1N0Q2	A-kinase anchoring protein 6(AKAP6)	Bos taurus		GO:0035556~intracellular signal transduction,GO:0060306~regulation of membrane repolarization,GO:0071320~cellular response to cAMP,GO:1902261~positive regulation of delayed rectifier potassium channel activity,	GO:0016529~sarcoplasmic reticulum,GO:0031965~nuclear membrane,GO:0034704~calcium channel complex,GO:0048471~perinuclear region of cytoplasm,	GO:0044325~ion channel binding,GO:0051018~protein kinase A binding,	IPR018159:Spectrin/alpha-actinin,IPR026696:A-kinase anchor protein 6/Centrosomal protein of 68kDa,			SM00150:SPEC,	Complete proteome,Reference proteome,
A6QLP4	A-kinase anchoring protein 7(AKAP7)	Bos taurus		GO:0008104~protein localization,GO:0010738~regulation of protein kinase A signaling,	GO:0005634~nucleus,GO:0005829~cytosol,	GO:0034237~protein kinase A regulatory subunit binding,	IPR009097:RNA ligase/cyclic nucleotide phosphodiesterase,IPR019510:Protein kinase A anchor protein, nuclear localisation signal domain,				Complete proteome,Reference proteome,
F1MMW4	A-kinase anchoring protein 8 like(AKAP8L)	Bos taurus		GO:0006397~mRNA processing,GO:0007076~mitotic chromosome condensation,GO:0010793~regulation of mRNA export from nucleus,GO:0031065~positive regulation of histone deacetylation,GO:0033127~regulation of histone phosphorylation,GO:0044839~cell cycle G2/M phase transition,GO:0045944~positive regulation of transcription from RNA polymerase II promoter,GO:0051081~nuclear envelope disassembly,	GO:0000785~chromatin,GO:0005634~nucleus,GO:0005737~cytoplasm,GO:0016363~nuclear matrix,GO:0016607~nuclear speck,	GO:0003677~DNA binding,GO:0017151~DEAD/H-box RNA helicase binding,GO:0044822~poly(A) RNA binding,	IPR007071:A-kinase anchoring protein 95 (AKAP95),	bta05169:Epstein-Barr virus infection,			Complete proteome,Reference proteome,
A7MB37	A-kinase anchoring protein 8(AKAP8)	Bos taurus		GO:0007067~mitotic nuclear division,GO:0007076~mitotic chromosome condensation,GO:0031065~positive regulation of histone deacetylation,GO:0032720~negative regulation of tumor necrosis factor production,GO:0033127~regulation of histone phosphorylation,GO:0044839~cell cycle G2/M phase transition,GO:0071222~cellular response to lipopolysaccharide,GO:0071380~cellular response to prostaglandin E stimu…	GO:0000793~condensed chromosome,GO:0001939~female pronucleus,GO:0005634~nucleus,GO:0005654~nucleoplasm,GO:0016020~membrane,GO:0016363~nuclear matrix,	GO:0003677~DNA binding,GO:0034237~protein kinase A regulatory subunit binding,GO:0044822~poly(A) RNA binding,	IPR007071:A-kinase anchoring protein 95 (AKAP95),				Complete proteome,Reference proteome,
F1MXF5	A-kinase anchoring protein 9(AKAP9)	Bos taurus		GO:0007020~microtubule nucleation,GO:0007165~signal transduction,GO:0033138~positive regulation of peptidyl-serine phosphorylation,GO:0060307~regulation of ventricular cardiac muscle cell membrane repolarization,GO:0071320~cellular response to cAMP,GO:0086091~regulation of heart rate by cardiac conduction,GO:1901018~positive regulation of potassium ion transmembrane transporter activity,	GO:0005795~Golgi stack,GO:0005801~cis-Golgi network,GO:0005813~centrosome,GO:0008076~voltage-gated potassium channel complex,	GO:0003677~DNA binding,GO:0015459~potassium channel regulator activity,	IPR005539:ELK,IPR019528:Pericentrin/AKAP-450 centrosomal targeting domain,			SM01188:SM01188,	Coiled coil,Complete proteome,Reference proteome,
A4FUD5	ABI family member 3(ABI3)	Bos taurus		GO:0030334~regulation of cell migration,	GO:0005737~cytoplasm,GO:0016020~membrane,GO:0030027~lamellipodium,		IPR001452:Src homology-3 domain,IPR012849:Abl-interactor, homeo-domain homologous domain,			SM00326:SH3,	Complete proteome,Reference proteome,
F1MXG8	ABL proto-oncogene 1, non-receptor tyrosine kinase(ABL1)	Bos taurus		GO:0001922~B-1 B cell homeostasis,GO:0002322~B cell proliferation involved in immune response,GO:0002333~transitional one stage B cell differentiation,GO:0006909~phagocytosis,GO:0006975~DNA damage induced protein phosphorylation,GO:0007169~transmembrane receptor protein tyrosine kinase signaling pathway,GO:0007173~epidermal growth factor receptor signaling pathway,GO:0007204~positive regulation o…	GO:0005654~nucleoplasm,GO:0005730~nucleolus,GO:0005829~cytosol,GO:0015629~actin cytoskeleton,GO:0031234~extrinsic component of cytoplasmic side of plasma membrane,GO:0031252~cell leading edge,GO:0048471~perinuclear region of cytoplasm,	GO:0000287~magnesium ion binding,GO:0004715~non-membrane spanning protein tyrosine kinase activity,GO:0005524~ATP binding,GO:0030145~manganese ion binding,	IPR000719:Protein kinase, catalytic domain,IPR000980:SH2 domain,IPR001245:Serine-threonine/tyrosine-protein kinase catalytic domain,IPR001452:Src homology-3 domain,IPR008266:Tyrosine-protein kinase, active site,IPR011009:Protein kinase-like domain,IPR015015:F-actin binding,IPR017441:Protein kinase, ATP binding site,IPR020635:Tyrosine-protein kinase, catalytic domain,	bta04012:ErbB signaling pathway,bta04014:Ras signaling pathway,bta04110:Cell cycle,bta04360:Axon guidance,bta04722:Neurotrophin signaling pathway,bta05200:Pathways in cancer,bta05206:MicroRNAs in cancer,bta05220:Chronic myeloid leukemia,bta05416:Viral myocarditis,		SM00219:TyrKc,SM00252:SH2,SM00326:SH3,SM00808:FABD,	ATP-binding,Complete proteome,Kinase,Nucleotide-binding,Reference proteome,SH3 domain,Transferase,Tyrosine-protein kinase,
F1MWH8	ABL proto-oncogene 2, non-receptor tyrosine kinase(ABL2)	Bos taurus		GO:0007169~transmembrane receptor protein tyrosine kinase signaling pathway,GO:0007204~positive regulation of cytosolic calcium ion concentration,GO:0010506~regulation of autophagy,GO:0010863~positive regulation of phospholipase C activity,GO:0010976~positive regulation of neuron projection development,GO:0016477~cell migration,GO:0030036~actin cytoskeleton organization,GO:0030100~regulation of e…	GO:0031234~extrinsic component of cytoplasmic side of plasma membrane,	GO:0000287~magnesium ion binding,GO:0004715~non-membrane spanning protein tyrosine kinase activity,GO:0005524~ATP binding,GO:0030145~manganese ion binding,	IPR000719:Protein kinase, catalytic domain,IPR000980:SH2 domain,IPR001245:Serine-threonine/tyrosine-protein kinase catalytic domain,IPR001452:Src homology-3 domain,IPR008266:Tyrosine-protein kinase, active site,IPR011009:Protein kinase-like domain,IPR015015:F-actin binding,IPR017441:Protein kinase, ATP binding site,IPR020635:Tyrosine-protein kinase, catalytic domain,	bta04012:ErbB signaling pathway,bta04014:Ras signaling pathway,bta05416:Viral myocarditis,		SM00219:TyrKc,SM00252:SH2,SM00326:SH3,SM00808:FABD,	ATP-binding,Complete proteome,Kinase,Nucleotide-binding,Reference proteome,SH3 domain,Transferase,Tyrosine-protein kinase,
Q3ZBN0	ABRA C-terminal like(ABRACL)	Bos taurus								SM01283:SM01283,	Acetylation,Complete proteome,Reference proteome,	chain:UPF0727 protein C6orf115 homolog,modified residue,
Q10741	ADAM metallopeptidase domain 10(ADAM10)	Bos taurus		GO:0001701~in utero embryonic development,GO:0006468~protein phosphorylation,GO:0006509~membrane protein ectodomain proteolysis,GO:0007162~negative regulation of cell adhesion,GO:0007219~Notch signaling pathway,GO:0008284~positive regulation of cell proliferation,GO:0010820~positive regulation of T cell chemotaxis,GO:0016485~protein processing,GO:0030307~positive regulation of cell growth,GO:0034…	GO:0000139~Golgi membrane,GO:0005634~nucleus,GO:0005737~cytoplasm,GO:0005794~Golgi apparatus,GO:0005798~Golgi-associated vesicle,GO:0005925~focal adhesion,GO:0009986~cell surface,GO:0014069~postsynaptic density,GO:0016021~integral component of membrane,GO:0070062~extracellular exosome,GO:0097038~perinuclear endoplasmic reticulum,GO:0097197~tetraspanin-enriched microdomain,	GO:0004175~endopeptidase activity,GO:0004222~metalloendopeptidase activity,GO:0005515~protein binding,GO:0008237~metallopeptidase activity,GO:0017124~SH3 domain binding,GO:0019901~protein kinase binding,GO:0042803~protein homodimerization activity,GO:0046872~metal ion binding,	IPR001590:Peptidase M12B, ADAM/reprolysin,IPR001762:Blood coagulation inhibitor, Disintegrin,IPR002870:Peptidase M12B, propeptide,IPR024079:Metallopeptidase, catalytic domain,IPR027053:Disintegrin and metalloproteinase domain-containing protein 10,	bta05010:Alzheimer's disease,		SM00050:DISIN,	3D-structure,Cell membrane,Cleavage on pair of basic residues,Complete proteome,Direct protein sequencing,Disulfide bond,Glycoprotein,Golgi apparatus,Hydrolase,Membrane,Metal-binding,Metalloprotease,Notch signaling pathway,Phosphoprotein,Protease,Reference proteome,SH3-binding,Signal,Transmembrane,Transmembrane helix,Zinc,Zymogen,	chain:Disintegrin and metalloproteinase domain- containing protein 10,compositionally biased region:Cys-rich,disulfide bond,domain:Disintegrin,domain:Peptidase M12B,glycosylation site:N-linked (GlcNAc...),helix,metal ion-binding site:Zinc; catalytic,metal ion-binding site:Zinc; in inhibited form,mutagenesis site,short sequence motif:Cysteine switch,short sequence motif:SH3-binding,signal peptide,…
F1N5I4	ADAM metallopeptidase domain 11(ADAM11)	Bos taurus			GO:0016021~integral component of membrane,	GO:0004222~metalloendopeptidase activity,	IPR000742:Epidermal growth factor-like domain,IPR001590:Peptidase M12B, ADAM/reprolysin,IPR001762:Blood coagulation inhibitor, Disintegrin,IPR002870:Peptidase M12B, propeptide,IPR006586:ADAM, cysteine-rich,IPR013032:EGF-like, conserved site,IPR013111:EGF, extracellular,IPR018358:Disintegrin, conserved site,IPR024079:Metallopeptidase, catalytic domain,			SM00050:DISIN,SM00608:ACR,	Complete proteome,Disulfide bond,Membrane,Reference proteome,Transmembrane,Transmembrane helix,
E1BBU4	ADAM metallopeptidase domain 15(ADAM15)	Bos taurus		GO:0001953~negative regulation of cell-matrix adhesion,GO:0007229~integrin-mediated signaling pathway,GO:0030308~negative regulation of cell growth,GO:0030336~negative regulation of cell migration,GO:0045087~innate immune response,GO:0060317~cardiac epithelial to mesenchymal transition,GO:0070528~protein kinase C signaling,GO:1900121~negative regulation of receptor binding,	GO:0005622~intracellular,GO:0009986~cell surface,GO:0016021~integral component of membrane,GO:0070062~extracellular exosome,	GO:0004222~metalloendopeptidase activity,	IPR000742:Epidermal growth factor-like domain,IPR001590:Peptidase M12B, ADAM/reprolysin,IPR001762:Blood coagulation inhibitor, Disintegrin,IPR002870:Peptidase M12B, propeptide,IPR006586:ADAM, cysteine-rich,IPR013032:EGF-like, conserved site,IPR024079:Metallopeptidase, catalytic domain,			SM00050:DISIN,SM00608:ACR,	Complete proteome,Disulfide bond,Membrane,Reference proteome,Signal,Transmembrane,Transmembrane helix,
F1ME22	ADAM metallopeptidase domain 19(ADAM19)	Bos taurus		GO:0006509~membrane protein ectodomain proteolysis,GO:0007507~heart development,	GO:0005794~Golgi apparatus,GO:0016021~integral component of membrane,	GO:0004222~metalloendopeptidase activity,	IPR000742:Epidermal growth factor-like domain,IPR001590:Peptidase M12B, ADAM/reprolysin,IPR001762:Blood coagulation inhibitor, Disintegrin,IPR002870:Peptidase M12B, propeptide,IPR006586:ADAM, cysteine-rich,IPR013032:EGF-like, conserved site,IPR018358:Disintegrin, conserved site,IPR024079:Metallopeptidase, catalytic domain,			SM00050:DISIN,SM00608:ACR,	Complete proteome,Disulfide bond,Membrane,Reference proteome,Signal,Transmembrane,Transmembrane helix,
O77780	ADAM metallopeptidase domain 2(ADAM2)	Bos taurus		GO:0006508~proteolysis,GO:0007155~cell adhesion,GO:0007338~single fertilization,GO:0008542~visual learning,GO:0030534~adult behavior,	GO:0009986~cell surface,GO:0016021~integral component of membrane,	GO:0004222~metalloendopeptidase activity,	IPR000742:Epidermal growth factor-like domain,IPR001590:Peptidase M12B, ADAM/reprolysin,IPR001762:Blood coagulation inhibitor, Disintegrin,IPR002870:Peptidase M12B, propeptide,IPR006586:ADAM, cysteine-rich,IPR018358:Disintegrin, conserved site,IPR024079:Metallopeptidase, catalytic domain,			SM00050:DISIN,SM00608:ACR,	Cell adhesion,Complete proteome,Disulfide bond,EGF-like domain,Glycoprotein,Membrane,Phosphoprotein,Reference proteome,Signal,Transmembrane,Transmembrane helix,	chain:Disintegrin and metalloproteinase domain- containing protein 2,compositionally biased region:Cys-rich,compositionally biased region:Poly-Ser,disulfide bond,domain:Disintegrin,domain:EGF-like,domain:Peptidase M12B,glycosylation site:N-linked (GlcNAc...),signal peptide,topological domain:Cytoplasmic,topological domain:Extracellular,transmembrane region,
F1MVW0	ADAM metallopeptidase domain 21(ADAM21)	Bos taurus			GO:0016021~integral component of membrane,GO:0030424~axon,GO:0043025~neuronal cell body,	GO:0004222~metalloendopeptidase activity,	IPR001590:Peptidase M12B, ADAM/reprolysin,IPR001762:Blood coagulation inhibitor, Disintegrin,IPR002870:Peptidase M12B, propeptide,IPR006586:ADAM, cysteine-rich,IPR013032:EGF-like, conserved site,IPR018358:Disintegrin, conserved site,IPR024079:Metallopeptidase, catalytic domain,			SM00050:DISIN,SM00608:ACR,	Complete proteome,Disulfide bond,Membrane,Reference proteome,Transmembrane,Transmembrane helix,
A4FUX7	ADAM metallopeptidase domain 23(ADAM23)	Bos taurus			GO:0016021~integral component of membrane,	GO:0004222~metalloendopeptidase activity,	IPR000742:Epidermal growth factor-like domain,IPR001590:Peptidase M12B, ADAM/reprolysin,IPR001762:Blood coagulation inhibitor, Disintegrin,IPR002870:Peptidase M12B, propeptide,IPR006586:ADAM, cysteine-rich,IPR013032:EGF-like, conserved site,IPR024079:Metallopeptidase, catalytic domain,			SM00050:DISIN,SM00608:ACR,	Complete proteome,Disulfide bond,Membrane,Reference proteome,Transmembrane,Transmembrane helix,
E1BG77	ADAM metallopeptidase domain 32(ADAM32)	Bos taurus			GO:0016021~integral component of membrane,	GO:0004222~metalloendopeptidase activity,	IPR000742:Epidermal growth factor-like domain,IPR001590:Peptidase M12B, ADAM/reprolysin,IPR001762:Blood coagulation inhibitor, Disintegrin,IPR002870:Peptidase M12B, propeptide,IPR006586:ADAM, cysteine-rich,IPR013032:EGF-like, conserved site,IPR018358:Disintegrin, conserved site,IPR024079:Metallopeptidase, catalytic domain,			SM00050:DISIN,SM00608:ACR,	Complete proteome,Disulfide bond,Membrane,Reference proteome,Signal,Transmembrane,Transmembrane helix,
A5D7M5	ADAM metallopeptidase domain 3A (cyritestin 1)(ADAM3A)	Bos taurus		GO:0007339~binding of sperm to zona pellucida,	GO:0009986~cell surface,GO:0016021~integral component of membrane,GO:0045121~membrane raft,	GO:0004222~metalloendopeptidase activity,	IPR000742:Epidermal growth factor-like domain,IPR001590:Peptidase M12B, ADAM/reprolysin,IPR001762:Blood coagulation inhibitor, Disintegrin,IPR002870:Peptidase M12B, propeptide,IPR006586:ADAM, cysteine-rich,IPR013032:EGF-like, conserved site,IPR024079:Metallopeptidase, catalytic domain,			SM00050:DISIN,SM00608:ACR,	Complete proteome,Disulfide bond,Membrane,Reference proteome,Signal,Transmembrane,Transmembrane helix,
F1MIY8	ADAM metallopeptidase domain 8(ADAM8)	Bos taurus		GO:0000902~cell morphogenesis,GO:0001525~angiogenesis,GO:0002523~leukocyte migration involved in inflammatory response,GO:0002675~positive regulation of acute inflammatory response,GO:0016337~single organismal cell-cell adhesion,GO:0033089~positive regulation of T cell differentiation in thymus,GO:0035419~activation of MAPK activity involved in innate immune response,GO:0043524~negative regulatio…	GO:0002102~podosome,GO:0005887~integral component of plasma membrane,GO:0009986~cell surface,GO:0032010~phagolysosome,GO:0032127~dense core granule membrane,GO:0042581~specific granule,GO:0070820~tertiary granule,GO:0071065~alpha9-beta1 integrin-vascular cell adhesion molecule-1 complex,GO:0071133~alpha9-beta1 integrin-ADAM8 complex,	GO:0004222~metalloendopeptidase activity,GO:0005509~calcium ion binding,GO:0008270~zinc ion binding,	IPR000742:Epidermal growth factor-like domain,IPR001590:Peptidase M12B, ADAM/reprolysin,IPR001762:Blood coagulation inhibitor, Disintegrin,IPR002870:Peptidase M12B, propeptide,IPR006586:ADAM, cysteine-rich,IPR013032:EGF-like, conserved site,IPR018358:Disintegrin, conserved site,IPR024079:Metallopeptidase, catalytic domain,			SM00050:DISIN,SM00608:ACR,	Complete proteome,Disulfide bond,Membrane,Reference proteome,Signal,Transmembrane,Transmembrane helix,
E1BMV7	ADAM metallopeptidase with thrombospondin type 1 motif 10(ADAMTS10)	Bos taurus			GO:0005578~proteinaceous extracellular matrix,	GO:0004222~metalloendopeptidase activity,GO:0008270~zinc ion binding,	IPR000884:Thrombospondin, type 1 repeat,IPR001590:Peptidase M12B, ADAM/reprolysin,IPR002870:Peptidase M12B, propeptide,IPR010294:ADAM-TS Spacer 1,IPR010909:PLAC,IPR013273:Peptidase M12B, ADAM-TS,IPR024079:Metallopeptidase, catalytic domain,			SM00209:TSP1,	Complete proteome,Disulfide bond,Reference proteome,Signal,
F1MXQ0	ADAM metallopeptidase with thrombospondin type 1 motif 12(ADAMTS12)	Bos taurus		GO:0007160~cell-matrix adhesion,GO:0016477~cell migration,GO:0030167~proteoglycan catabolic process,GO:0032331~negative regulation of chondrocyte differentiation,GO:0050727~regulation of inflammatory response,GO:0051603~proteolysis involved in cellular protein catabolic process,GO:0071347~cellular response to interleukin-1,GO:0071356~cellular response to tumor necrosis factor,GO:0071773~cellular …	GO:0005578~proteinaceous extracellular matrix,	GO:0004222~metalloendopeptidase activity,GO:0008270~zinc ion binding,	IPR000884:Thrombospondin, type 1 repeat,IPR001590:Peptidase M12B, ADAM/reprolysin,IPR002870:Peptidase M12B, propeptide,IPR010294:ADAM-TS Spacer 1,IPR010909:PLAC,IPR013273:Peptidase M12B, ADAM-TS,IPR024079:Metallopeptidase, catalytic domain,			SM00209:TSP1,	Complete proteome,Disulfide bond,Reference proteome,Signal,
F1MVP0	ADAM metallopeptidase with thrombospondin type 1 motif 13(ADAMTS13)	Bos taurus		GO:0043171~peptide catabolic process,	GO:0005578~proteinaceous extracellular matrix,GO:0005615~extracellular space,	GO:0004222~metalloendopeptidase activity,GO:0008270~zinc ion binding,	IPR000859:CUB domain,IPR000884:Thrombospondin, type 1 repeat,IPR001590:Peptidase M12B, ADAM/reprolysin,IPR006586:ADAM, cysteine-rich,IPR013273:Peptidase M12B, ADAM-TS,IPR024079:Metallopeptidase, catalytic domain,			SM00209:TSP1,SM00608:ACR,	Complete proteome,Disulfide bond,Reference proteome,
E1BFV4	ADAM metallopeptidase with thrombospondin type 1 motif 14(ADAMTS14)	Bos taurus		GO:0030199~collagen fibril organization,	GO:0005578~proteinaceous extracellular matrix,	GO:0004222~metalloendopeptidase activity,GO:0008270~zinc ion binding,	IPR000884:Thrombospondin, type 1 repeat,IPR001590:Peptidase M12B, ADAM/reprolysin,IPR002870:Peptidase M12B, propeptide,IPR010294:ADAM-TS Spacer 1,IPR010909:PLAC,IPR013273:Peptidase M12B, ADAM-TS,IPR024079:Metallopeptidase, catalytic domain,			SM00209:TSP1,	Complete proteome,Disulfide bond,Reference proteome,Signal,
E1BN99	ADAM metallopeptidase with thrombospondin type 1 motif 15(ADAMTS15)	Bos taurus			GO:0005578~proteinaceous extracellular matrix,GO:0005615~extracellular space,GO:0009986~cell surface,	GO:0004222~metalloendopeptidase activity,GO:0008201~heparin binding,GO:0008270~zinc ion binding,GO:0050840~extracellular matrix binding,	IPR000884:Thrombospondin, type 1 repeat,IPR001590:Peptidase M12B, ADAM/reprolysin,IPR002870:Peptidase M12B, propeptide,IPR006586:ADAM, cysteine-rich,IPR010294:ADAM-TS Spacer 1,IPR013273:Peptidase M12B, ADAM-TS,IPR013277:Peptidase M12B, ADAM-TS8,IPR024079:Metallopeptidase, catalytic domain,			SM00209:TSP1,SM00608:ACR,	Complete proteome,Disulfide bond,Reference proteome,Signal,
E1B8S3	ADAM metallopeptidase with thrombospondin type 1 motif 18(ADAMTS18)	Bos taurus		GO:0001654~eye development,GO:0090331~negative regulation of platelet aggregation,	GO:0005578~proteinaceous extracellular matrix,	GO:0004222~metalloendopeptidase activity,GO:0008270~zinc ion binding,	IPR000884:Thrombospondin, type 1 repeat,IPR001590:Peptidase M12B, ADAM/reprolysin,IPR002870:Peptidase M12B, propeptide,IPR010294:ADAM-TS Spacer 1,IPR010909:PLAC,IPR013273:Peptidase M12B, ADAM-TS,IPR024079:Metallopeptidase, catalytic domain,			SM00209:TSP1,	Complete proteome,Disulfide bond,Reference proteome,Signal,
F1N303	ADAM metallopeptidase with thrombospondin type 1 motif 19(ADAMTS19)	Bos taurus			GO:0005578~proteinaceous extracellular matrix,	GO:0004222~metalloendopeptidase activity,GO:0008270~zinc ion binding,	IPR000884:Thrombospondin, type 1 repeat,IPR001590:Peptidase M12B, ADAM/reprolysin,IPR002870:Peptidase M12B, propeptide,IPR006586:ADAM, cysteine-rich,IPR010294:ADAM-TS Spacer 1,IPR010909:PLAC,IPR013273:Peptidase M12B, ADAM-TS,IPR024079:Metallopeptidase, catalytic domain,			SM00209:TSP1,SM00608:ACR,	Complete proteome,Disulfide bond,Reference proteome,Signal,
P79331	ADAM metallopeptidase with thrombospondin type 1 motif 2(ADAMTS2)	Bos taurus		GO:0007283~spermatogenesis,GO:0016485~protein processing,GO:0030199~collagen fibril organization,GO:0030324~lung development,GO:0030574~collagen catabolic process,GO:0032964~collagen biosynthetic process,GO:0043206~extracellular fibril organization,GO:0043588~skin development,	GO:0005578~proteinaceous extracellular matrix,	GO:0004222~metalloendopeptidase activity,GO:0008270~zinc ion binding,	IPR000884:Thrombospondin, type 1 repeat,IPR001590:Peptidase M12B, ADAM/reprolysin,IPR002870:Peptidase M12B, propeptide,IPR010294:ADAM-TS Spacer 1,IPR010909:PLAC,IPR013273:Peptidase M12B, ADAM-TS,IPR013275:Peptidase M12B, ADAM-TS2,IPR024079:Metallopeptidase, catalytic domain,			SM00209:TSP1,	Cleavage on pair of basic residues,Collagen degradation,Complete proteome,Direct protein sequencing,Disulfide bond,Extracellular matrix,Glycoprotein,Hydrolase,Metal-binding,Metalloprotease,Protease,Reference proteome,Repeat,Secreted,Signal,Zinc,Zymogen,	chain:A disintegrin and metalloproteinase with thrombospondin motifs 2,compositionally biased region:Cys-rich,compositionally biased region:Poly-Ala,compositionally biased region:Poly-Glu,disulfide bond,domain:Disintegrin,domain:Peptidase M12B,domain:PLAC,domain:TSP type-1 1,domain:TSP type-1 2,domain:TSP type-1 3,domain:TSP type-1 4,glycosylation site:N-linked (GlcNAc...),metal ion-binding site:…
E1BC50	ADAM metallopeptidase with thrombospondin type 1 motif 3(ADAMTS3)	Bos taurus		GO:0010573~vascular endothelial growth factor production,GO:0016485~protein processing,GO:0032964~collagen biosynthetic process,GO:1900748~positive regulation of vascular endothelial growth factor signaling pathway,	GO:0005578~proteinaceous extracellular matrix,GO:0005615~extracellular space,GO:0070062~extracellular exosome,	GO:0004222~metalloendopeptidase activity,GO:0008270~zinc ion binding,	IPR000884:Thrombospondin, type 1 repeat,IPR001590:Peptidase M12B, ADAM/reprolysin,IPR002870:Peptidase M12B, propeptide,IPR010294:ADAM-TS Spacer 1,IPR010909:PLAC,IPR013273:Peptidase M12B, ADAM-TS,IPR024079:Metallopeptidase, catalytic domain,			SM00209:TSP1,	Complete proteome,Disulfide bond,Reference proteome,Signal,
Q9TT93	ADAM metallopeptidase with thrombospondin type 1 motif 4(ADAMTS4)	Bos taurus		GO:0006508~proteolysis,	GO:0005578~proteinaceous extracellular matrix,GO:0005615~extracellular space,	GO:0004222~metalloendopeptidase activity,GO:0008237~metallopeptidase activity,GO:0008270~zinc ion binding,	IPR000884:Thrombospondin, type 1 repeat,IPR001590:Peptidase M12B, ADAM/reprolysin,IPR002870:Peptidase M12B, propeptide,IPR006586:ADAM, cysteine-rich,IPR010294:ADAM-TS Spacer 1,IPR013273:Peptidase M12B, ADAM-TS,IPR024079:Metallopeptidase, catalytic domain,			SM00209:TSP1,SM00608:ACR,	Cleavage on pair of basic residues,Complete proteome,Direct protein sequencing,Disulfide bond,Extracellular matrix,Glycoprotein,Hydrolase,Metal-binding,Metalloprotease,Protease,Reference proteome,Secreted,Signal,Zinc,Zymogen,	chain:A disintegrin and metalloproteinase with thrombospondin motifs 4,compositionally biased region:Cys-rich,compositionally biased region:Poly-Ala,disulfide bond,domain:Disintegrin,domain:Peptidase M12B,domain:TSP type-1,glycosylation site:N-linked (GlcNAc...),metal ion-binding site:Zinc; catalytic,metal ion-binding site:Zinc; in inhibited form,region of interest:Spacer,short sequence motif:Cys…
F1MRZ2	ADAM metallopeptidase with thrombospondin type 1 motif 5(ADAMTS5)	Bos taurus		GO:0006508~proteolysis,GO:0042742~defense response to bacterium,	GO:0005578~proteinaceous extracellular matrix,GO:0005615~extracellular space,	GO:0004222~metalloendopeptidase activity,GO:0008201~heparin binding,GO:0008270~zinc ion binding,GO:0046872~metal ion binding,GO:0050840~extracellular matrix binding,	IPR000884:Thrombospondin, type 1 repeat,IPR001590:Peptidase M12B, ADAM/reprolysin,IPR002870:Peptidase M12B, propeptide,IPR006586:ADAM, cysteine-rich,IPR010294:ADAM-TS Spacer 1,IPR013273:Peptidase M12B, ADAM-TS,IPR013276:Peptidase M12B, ADAM-TS5,IPR024079:Metallopeptidase, catalytic domain,			SM00209:TSP1,SM00608:ACR,	Complete proteome,Disulfide bond,Extracellular matrix,Glycoprotein,Hydrolase,Metal-binding,Metalloprotease,Protease,Reference proteome,Secreted,Signal,Zinc,	chain:A disintegrin and metalloproteinase with thrombospondin motifs 5,disulfide bond,domain:Disintegrin,domain:Peptidase M12B,domain:TSP type-1,glycosylation site:N-linked (GlcNAc...),metal ion-binding site:Zinc; catalytic,
F1N2M2	ADAM metallopeptidase with thrombospondin type 1 motif 7(ADAMTS7)	Bos taurus		GO:0032331~negative regulation of chondrocyte differentiation,GO:0051603~proteolysis involved in cellular protein catabolic process,GO:0071347~cellular response to interleukin-1,GO:0071356~cellular response to tumor necrosis factor,GO:0071773~cellular response to BMP stimulus,GO:0098779~mitophagy in response to mitochondrial depolarization,	GO:0005578~proteinaceous extracellular matrix,GO:0009986~cell surface,	GO:0004222~metalloendopeptidase activity,GO:0008270~zinc ion binding,	IPR000884:Thrombospondin, type 1 repeat,IPR001590:Peptidase M12B, ADAM/reprolysin,IPR002870:Peptidase M12B, propeptide,IPR010294:ADAM-TS Spacer 1,IPR010909:PLAC,IPR013273:Peptidase M12B, ADAM-TS,IPR024079:Metallopeptidase, catalytic domain,			SM00209:TSP1,	Complete proteome,Disulfide bond,Reference proteome,Signal,
F1MP11	ADAM metallopeptidase with thrombospondin type 1 motif 8(ADAMTS8)	Bos taurus			GO:0005578~proteinaceous extracellular matrix,	GO:0004222~metalloendopeptidase activity,GO:0008270~zinc ion binding,	IPR000884:Thrombospondin, type 1 repeat,IPR001590:Peptidase M12B, ADAM/reprolysin,IPR002870:Peptidase M12B, propeptide,IPR010294:ADAM-TS Spacer 1,IPR013273:Peptidase M12B, ADAM-TS,IPR013277:Peptidase M12B, ADAM-TS8,IPR024079:Metallopeptidase, catalytic domain,			SM00209:TSP1,	Coiled coil,Complete proteome,Disulfide bond,Reference proteome,Signal,
E1BI72	ADAM metallopeptidase with thrombospondin type 1 motif 9(ADAMTS9)	Bos taurus		GO:0045636~positive regulation of melanocyte differentiation,	GO:0005578~proteinaceous extracellular matrix,GO:0005615~extracellular space,GO:0009986~cell surface,	GO:0004222~metalloendopeptidase activity,GO:0008270~zinc ion binding,	IPR000884:Thrombospondin, type 1 repeat,IPR001590:Peptidase M12B, ADAM/reprolysin,IPR002870:Peptidase M12B, propeptide,IPR010294:ADAM-TS Spacer 1,IPR012314:Peptidase M12B, GON-ADAMTSs,IPR013273:Peptidase M12B, ADAM-TS,IPR024079:Metallopeptidase, catalytic domain,			SM00209:TSP1,	Complete proteome,Disulfide bond,Reference proteome,Signal,
F1MJP4	ADAM-like, decysin 1(ADAMDEC1)	Bos taurus			GO:0016021~integral component of membrane,	GO:0004222~metalloendopeptidase activity,	IPR001590:Peptidase M12B, ADAM/reprolysin,IPR001762:Blood coagulation inhibitor, Disintegrin,IPR002870:Peptidase M12B, propeptide,IPR024079:Metallopeptidase, catalytic domain,			SM00050:DISIN,	Complete proteome,Disulfide bond,Membrane,Reference proteome,Transmembrane,Transmembrane helix,
E1BK41	ADAMTS like 1(ADAMTSL1)	Bos taurus			GO:0005578~proteinaceous extracellular matrix,	GO:0008237~metallopeptidase activity,GO:0008270~zinc ion binding,	IPR000884:Thrombospondin, type 1 repeat,IPR003598:Immunoglobulin subtype 2,IPR003599:Immunoglobulin subtype,IPR007110:Immunoglobulin-like domain,IPR010909:PLAC,IPR013098:Immunoglobulin I-set,IPR013273:Peptidase M12B, ADAM-TS,IPR013783:Immunoglobulin-like fold,			SM00209:TSP1,SM00408:IGc2,SM00409:IG,	Complete proteome,Reference proteome,Signal,
F1MXR3	ADAMTS like 4(ADAMTSL4)	Bos taurus		GO:0002064~epithelial cell development,GO:0030198~extracellular matrix organization,GO:0043065~positive regulation of apoptotic process,	GO:0005614~interstitial matrix,GO:0031012~extracellular matrix,	GO:0004222~metalloendopeptidase activity,GO:0008233~peptidase activity,	IPR000884:Thrombospondin, type 1 repeat,IPR010294:ADAM-TS Spacer 1,IPR010909:PLAC,			SM00209:TSP1,	Complete proteome,Reference proteome,Signal,
A6QLD7	ADNP homeobox 2(ADNP2)	Bos taurus		GO:0030182~neuron differentiation,GO:0030307~positive regulation of cell growth,GO:0034599~cellular response to oxidative stress,GO:0060548~negative regulation of cell death,GO:0071300~cellular response to retinoic acid,		GO:0003677~DNA binding,GO:0046872~metal ion binding,	IPR001356:Homeodomain,IPR007087:Zinc finger, C2H2,IPR009057:Homeodomain-like,IPR015880:Zinc finger, C2H2-like,			SM00355:ZnF_C2H2,SM00389:HOX,	Complete proteome,Reference proteome,
A2VE47	ADP dependent glucokinase(ADPGK)	Bos taurus		GO:0006096~glycolytic process,	GO:0005576~extracellular region,GO:0005783~endoplasmic reticulum,GO:0016020~membrane,	GO:0043843~ADP-specific glucokinase activity,GO:0046872~metal ion binding,	IPR007666:ADP-specific phosphofructokinase/glucokinase,	bta00010:Glycolysis / Gluconeogenesis,bta01100:Metabolic pathways,bta01130:Biosynthesis of antibiotics,bta01200:Carbon metabolism,			Complete proteome,Glycolysis,Kinase,Magnesium,Metal-binding,Reference proteome,Secreted,Signal,Transferase,	active site:Proton acceptor,chain:ADP-dependent glucokinase,domain:ADPK,metal ion-binding site:Magnesium,signal peptide,
Q5E9I6	ADP ribosylation factor 3(ARF3)	Bos taurus		GO:0007264~small GTPase mediated signal transduction,GO:0015031~protein transport,GO:0016192~vesicle-mediated transport,	GO:0005794~Golgi apparatus,GO:0048471~perinuclear region of cytoplasm,	GO:0005525~GTP binding,	IPR005225:Small GTP-binding protein domain,IPR006689:Small GTPase superfamily, ARF/SAR type,IPR024156:Small GTPase superfamily, ARF type,IPR027417:P-loop containing nucleoside triphosphate hydrolase,	bta04144:Endocytosis,			Complete proteome,Cytoplasm,ER-Golgi transport,Golgi apparatus,GTP-binding,Lipoprotein,Myristate,Nucleotide-binding,Protein transport,Reference proteome,Transport,	chain:ADP-ribosylation factor 1,chain:ADP-ribosylation factor 3,helix,lipid moiety-binding region:N-myristoyl glycine,modified residue,nucleotide phosphate-binding region:GTP,strand,turn,
Q3SZF2	ADP ribosylation factor 4(ARF4)	Bos taurus		GO:0006471~protein ADP-ribosylation,GO:0006890~retrograde vesicle-mediated transport, Golgi to ER,GO:0007264~small GTPase mediated signal transduction,GO:0007612~learning,GO:0015031~protein transport,GO:0016477~cell migration,GO:0031584~activation of phospholipase D activity,GO:0043066~negative regulation of apoptotic process,GO:0045176~apical protein localization,GO:0045197~establishment or main…	GO:0005794~Golgi apparatus,GO:0005829~cytosol,GO:0031012~extracellular matrix,GO:0032587~ruffle membrane,GO:0043197~dendritic spine,GO:0070062~extracellular exosome,	GO:0005154~epidermal growth factor receptor binding,GO:0005525~GTP binding,	IPR005225:Small GTP-binding protein domain,IPR006689:Small GTPase superfamily, ARF/SAR type,IPR024156:Small GTPase superfamily, ARF type,IPR027417:P-loop containing nucleoside triphosphate hydrolase,				Complete proteome,ER-Golgi transport,Golgi apparatus,GTP-binding,Lipoprotein,Membrane,Myristate,Nucleotide-binding,Phosphoprotein,Protein transport,Reference proteome,Transport,	chain:ADP-ribosylation factor 4,lipid moiety-binding region:N-myristoyl glycine,nucleotide phosphate-binding region:GTP,
G3N3N1	ADP ribosylation factor 6(ARF6)	Bos taurus		GO:0001889~liver development,GO:0007264~small GTPase mediated signal transduction,GO:0030838~positive regulation of actin filament polymerization,GO:0030866~cortical actin cytoskeleton organization,GO:0031529~ruffle organization,GO:0031584~activation of phospholipase D activity,GO:0033028~myeloid cell apoptotic process,GO:0034394~protein localization to cell surface,GO:0035020~regulation of Rac p…	GO:0001726~ruffle,GO:0005886~plasma membrane,GO:0005925~focal adhesion,GO:0005938~cell cortex,GO:0030139~endocytic vesicle,GO:0031527~filopodium membrane,GO:0042584~chromaffin granule membrane,GO:0043209~myelin sheath,GO:0055038~recycling endosome membrane,GO:0070062~extracellular exosome,	GO:0005525~GTP binding,GO:0031681~G-protein beta-subunit binding,	IPR005225:Small GTP-binding protein domain,IPR006689:Small GTPase superfamily, ARF/SAR type,IPR024156:Small GTPase superfamily, ARF type,IPR027417:P-loop containing nucleoside triphosphate hydrolase,	bta04014:Ras signaling pathway,bta04144:Endocytosis,bta04666:Fc gamma R-mediated phagocytosis,			Complete proteome,GTP-binding,Nucleotide-binding,Reference proteome,
A6QR32	ADP ribosylation factor GTPase activating protein 2(ARFGAP2)	Bos taurus		GO:0015031~protein transport,GO:0016192~vesicle-mediated transport,GO:0043547~positive regulation of GTPase activity,	GO:0000139~Golgi membrane,GO:0005794~Golgi apparatus,GO:0005886~plasma membrane,	GO:0005096~GTPase activator activity,GO:0046872~metal ion binding,	IPR001164:Arf GTPase activating protein,	bta04144:Endocytosis,		SM00105:ArfGap,	Acetylation,Coiled coil,Complete proteome,Cytoplasm,ER-Golgi transport,Golgi apparatus,GTPase activation,Membrane,Metal-binding,Phosphoprotein,Protein transport,Reference proteome,Transport,Zinc,Zinc-finger,	chain:ADP-ribosylation factor GTPase-activating protein 2,domain:Arf-GAP,modified residue,region of interest:Required for interaction with coatomer,zinc finger region:C4-type,
Q17R07	ADP ribosylation factor GTPase activating protein 3(ARFGAP3)	Bos taurus		GO:0009306~protein secretion,GO:0016192~vesicle-mediated transport,GO:0043547~positive regulation of GTPase activity,	GO:0000139~Golgi membrane,GO:0005829~cytosol,	GO:0005096~GTPase activator activity,GO:0046872~metal ion binding,	IPR001164:Arf GTPase activating protein,	bta04144:Endocytosis,		SM00105:ArfGap,	Coiled coil,Complete proteome,Cytoplasm,ER-Golgi transport,Golgi apparatus,GTPase activation,Membrane,Metal-binding,Phosphoprotein,Protein transport,Reference proteome,Transport,Zinc,Zinc-finger,	chain:ADP-ribosylation factor GTPase-activating protein 3,compositionally biased region:Ser-rich,domain:Arf-GAP,modified residue,zinc finger region:C4-type,
O46382	ADP ribosylation factor guanine nucleotide exchange factor 1(ARFGEF1)	Bos taurus	General function prediction only,	GO:0007030~Golgi organization,GO:0010256~endomembrane system organization,GO:0015031~protein transport,GO:0016192~vesicle-mediated transport,GO:0030837~negative regulation of actin filament polymerization,GO:0032012~regulation of ARF protein signal transduction,GO:0034260~negative regulation of GTPase activity,GO:0043547~positive regulation of GTPase activity,GO:0090284~positive regulation of pro…	GO:0000139~Golgi membrane,GO:0005654~nucleoplasm,GO:0005730~nucleolus,GO:0005802~trans-Golgi network,GO:0005829~cytosol,GO:0016363~nuclear matrix,GO:0030532~small nuclear ribonucleoprotein complex,GO:0048471~perinuclear region of cytoplasm,	GO:0005086~ARF guanyl-nucleotide exchange factor activity,GO:0034237~protein kinase A regulatory subunit binding,	IPR000904:SEC7-like,IPR011989:Armadillo-like helical,IPR015403:Domain of unknown function DUF1981, SEC7 associated,IPR016024:Armadillo-type fold,IPR023394:SEC7-like, alpha orthogonal bundle,	bta04144:Endocytosis,		SM00222:Sec7,	Complete proteome,Cytoplasm,Direct protein sequencing,Golgi apparatus,Guanine-nucleotide releasing factor,Membrane,Nucleus,Phosphoprotein,Protein transport,Reference proteome,Transport,	chain:Brefeldin A-inhibited guanine nucleotide- exchange protein 1,domain:SEC7,modified residue,
E1BKI9	ADP ribosylation factor guanine nucleotide exchange factor 2(ARFGEF2)	Bos taurus	General function prediction only,	GO:0001881~receptor recycling,GO:0006893~Golgi to plasma membrane transport,GO:0007032~endosome organization,GO:0016192~vesicle-mediated transport,GO:0032012~regulation of ARF protein signal transduction,GO:0032760~positive regulation of tumor necrosis factor production,GO:0035556~intracellular signal transduction,	GO:0000139~Golgi membrane,GO:0005802~trans-Golgi network,GO:0005815~microtubule organizing center,GO:0005829~cytosol,GO:0055037~recycling endosome,	GO:0005086~ARF guanyl-nucleotide exchange factor activity,	IPR000904:SEC7-like,IPR011989:Armadillo-like helical,IPR015403:Domain of unknown function DUF1981, SEC7 associated,IPR016024:Armadillo-type fold,IPR023394:SEC7-like, alpha orthogonal bundle,	bta04144:Endocytosis,		SM00222:Sec7,	Complete proteome,Reference proteome,
Q3ZCL5	ADP ribosylation factor interacting protein 2(ARFIP2)	Bos taurus		GO:0031529~ruffle organization,GO:0034315~regulation of Arp2/3 complex-mediated actin nucleation,	GO:0005737~cytoplasm,	GO:0019904~protein domain specific binding,	IPR010504:Arfaptin homology (AH) domain,IPR027267:Arfaptin homology (AH) domain/BAR domain,			SM01015:SM01015,	Complete proteome,Phosphoprotein,Reference proteome,	chain:Arfaptin-2,domain:AH,
Q5EA92	ADP ribosylation factor like GTPase 14 effector protein(ARL14EP)	Bos taurus			GO:0005737~cytoplasm,		IPR026515:ARF7 effector protein,				Acetylation,Complete proteome,Cytoplasm,Phosphoprotein,Reference proteome,	chain:Uncharacterized protein C11orf46 homolog,compositionally biased region:Cys-rich,sequence conflict,
Q2TA37	ADP ribosylation factor like GTPase 2(ARL2)	Bos taurus		GO:0007049~cell cycle,GO:0007264~small GTPase mediated signal transduction,GO:0010811~positive regulation of cell-substrate adhesion,GO:0031116~positive regulation of microtubule polymerization,GO:0034260~negative regulation of GTPase activity,GO:0034333~adherens junction assembly,GO:0051297~centrosome organization,GO:0051457~maintenance of protein location in nucleus,GO:0070830~bicellular tight …	GO:0005634~nucleus,GO:0005737~cytoplasm,GO:0005739~mitochondrion,GO:0005758~mitochondrial intermembrane space,GO:0005813~centrosome,GO:0016328~lateral plasma membrane,GO:0070062~extracellular exosome,	GO:0003924~GTPase activity,GO:0005515~protein binding,GO:0005525~GTP binding,GO:0019003~GDP binding,	IPR005225:Small GTP-binding protein domain,IPR006689:Small GTPase superfamily, ARF/SAR type,IPR024156:Small GTPase superfamily, ARF type,IPR027417:P-loop containing nucleoside triphosphate hydrolase,				Cell cycle,Complete proteome,Cytoplasm,Cytoskeleton,GTP-binding,Isopeptide bond,Lipoprotein,Mitochondrion,Myristate,Nucleotide-binding,Nucleus,Phosphoprotein,Reference proteome,Ubl conjugation,	binding site:GTP; via amide nitrogen,chain:ADP-ribosylation factor-like protein 2,cross-link:Glycyl lysine isopeptide (Lys-Gly) (interchain with G-Cter in ubiquitin),lipid moiety-binding region:N-myristoyl glycine,modified residue,nucleotide phosphate-binding region:GTP,
Q0VC18	ADP ribosylation factor like GTPase 4D(ARL4D)	Bos taurus		GO:0007264~small GTPase mediated signal transduction,	GO:0005730~nucleolus,GO:0005737~cytoplasm,GO:0005886~plasma membrane,	GO:0005525~GTP binding,	IPR005225:Small GTP-binding protein domain,IPR006689:Small GTPase superfamily, ARF/SAR type,IPR024156:Small GTPase superfamily, ARF type,IPR027417:P-loop containing nucleoside triphosphate hydrolase,				Cell membrane,Complete proteome,Cytoplasm,GTP-binding,Lipoprotein,Membrane,Myristate,Nucleotide-binding,Nucleus,Reference proteome,	chain:ADP-ribosylation factor-like protein 4D,lipid moiety-binding region:N-myristoyl glycine,nucleotide phosphate-binding region:GTP,
F1N671	ADP ribosylation factor like GTPase 6 interacting protein 4(ARL6IP4)	Bos taurus		GO:0008380~RNA splicing,	GO:0005634~nucleus,	GO:0044822~poly(A) RNA binding,	IPR019532:Nuclear RNA-splicing-associated protein, SR-25,				Complete proteome,Reference proteome,
Q3MHM8	ADP ribosylation factor like GTPase 6 interacting protein 6(ARL6IP6)	Bos taurus			GO:0016021~integral component of membrane,						Complete proteome,Membrane,Phosphoprotein,Reference proteome,Transmembrane,Transmembrane helix,	chain:ADP-ribosylation factor-like protein 6- interacting protein 6,modified residue,transmembrane region,
Q3ZBM1	ADP-ribosylhydrolase like 1(ADPRHL1)	Bos taurus		GO:0006886~intracellular protein transport,GO:0031338~regulation of vesicle fusion,GO:0051725~protein de-ADP-ribosylation,GO:0090630~activation of GTPase activity,	GO:0005622~intracellular,GO:0012505~endomembrane system,	GO:0000287~magnesium ion binding,GO:0003875~ADP-ribosylarginine hydrolase activity,GO:0005096~GTPase activator activity,GO:0017137~Rab GTPase binding,	IPR005502:ADP-ribosylation/Crystallin J1,IPR012108:ADP-ribosylarginine hydrolase,		PIRSF016939:ADP-ribosylarginine hydrolase,		Complete proteome,Hydrolase,Phosphoprotein,Reference proteome,	chain:[Protein ADP-ribosylarginine] hydrolase- like protein 1,
Q3SYV9	ADP-ribosylhydrolase like 2(ADPRHL2)	Bos taurus		GO:0071451~cellular response to superoxide,	GO:0005634~nucleus,GO:0005654~nucleoplasm,GO:0005739~mitochondrion,GO:0005759~mitochondrial matrix,	GO:0004649~poly(ADP-ribose) glycohydrolase activity,GO:0046872~metal ion binding,	IPR005502:ADP-ribosylation/Crystallin J1,				Complete proteome,Cytoplasm,Hydrolase,Magnesium,Metal-binding,Mitochondrion,Nucleus,Reference proteome,Transit peptide,	chain:Poly(ADP-ribose) glycohydrolase ARH3,compositionally biased region:Poly-Ala,metal ion-binding site:Magnesium 1,metal ion-binding site:Magnesium 2,
A7E328	ADP-ribosyltransferase 5-like(LOC407148)	Bos taurus		GO:0006471~protein ADP-ribosylation,		GO:0003956~NAD(P)+-protein-arginine ADP-ribosyltransferase activity,	IPR000768:NAD:arginine ADP-ribosyltransferase, ART,				Complete proteome,Glycosyltransferase,NAD,NADP,Reference proteome,Signal,Transferase,
F1N1C7	AE binding protein 1(AEBP1)	Bos taurus		GO:0006518~peptide metabolic process,GO:0016485~protein processing,	GO:0005615~extracellular space,GO:0031012~extracellular matrix,GO:0070062~extracellular exosome,	GO:0000977~RNA polymerase II regulatory region sequence-specific DNA binding,GO:0001227~transcriptional repressor activity, RNA polymerase II transcription regulatory region sequence-specific binding,GO:0003714~transcription corepressor activity,GO:0004181~metallocarboxypeptidase activity,GO:0004185~serine-type carboxypeptidase activity,GO:0008270~zinc ion binding,	IPR000421:Coagulation factor 5/8 C-terminal type domain,IPR000834:Peptidase M14, carboxypeptidase A,IPR008969:Carboxypeptidase-like, regulatory domain,IPR008979:Galactose-binding domain-like,IPR014766:Carboxypeptidase, regulatory domain,			SM00231:FA58C,SM00631:Zn_pept,	Complete proteome,Reference proteome,Signal,
A4FV57	AE binding protein 2(AEBP2)	Bos taurus		GO:0000122~negative regulation of transcription from RNA polymerase II promoter,GO:0006351~transcription, DNA-templated,GO:0016569~covalent chromatin modification,	GO:0035098~ESC/E(Z) complex,	GO:0000978~RNA polymerase II core promoter proximal region sequence-specific DNA binding,GO:0001078~transcriptional repressor activity, RNA polymerase II core promoter proximal region sequence-specific binding,GO:0003714~transcription corepressor activity,GO:0046872~metal ion binding,	IPR007087:Zinc finger, C2H2,IPR013087:Zinc finger C2H2-type/integrase DNA-binding domain,IPR015880:Zinc finger, C2H2-like,			SM00355:ZnF_C2H2,	Acetylation,Chromatin regulator,Complete proteome,DNA-binding,Metal-binding,Nucleus,Phosphoprotein,Reference proteome,Repeat,Repressor,Transcription,Transcription regulation,Zinc,Zinc-finger,	chain:Zinc finger protein aebp2,compositionally biased region:Glu-rich,compositionally biased region:Gly-rich,compositionally biased region:Ser-rich,modified residue,region of interest:Interaction with RBBP4,region of interest:Interaction with SUZ12,zinc finger region:C2H2-type 1,zinc finger region:C2H2-type 2; degenerate,zinc finger region:C2H2-type 3,
E1BHU6	AF4/FMR2 family member 1(AFF1)	Bos taurus			GO:0008023~transcription elongation factor complex,		IPR007797:Transcription factor AF4/FMR2,	bta05202:Transcriptional misregulation in cancer,			Complete proteome,Reference proteome,
E1BP77	AF4/FMR2 family member 2(AFF2)	Bos taurus		GO:0007611~learning or memory,GO:0043484~regulation of RNA splicing,	GO:0016607~nuclear speck,	GO:0002151~G-quadruplex RNA binding,	IPR007797:Transcription factor AF4/FMR2,				Complete proteome,Reference proteome,
F1N772	AF4/FMR2 family member 3(AFF3)	Bos taurus		GO:0034612~response to tumor necrosis factor,GO:0035116~embryonic hindlimb morphogenesis,	GO:0005654~nucleoplasm,GO:0005737~cytoplasm,	GO:0003690~double-stranded DNA binding,	IPR007797:Transcription factor AF4/FMR2,				Complete proteome,Reference proteome,
E1BCF6	AF4/FMR2 family member 4(AFF4)	Bos taurus		GO:0007286~spermatid development,	GO:0008023~transcription elongation factor complex,GO:0035327~transcriptionally active chromatin,		IPR007797:Transcription factor AF4/FMR2,				Complete proteome,Reference proteome,
A6QQC0	AHA1, activator of heat shock 90kDa protein ATPase homolog 2 (yeast)(AHSA2)	Bos taurus		GO:0032781~positive regulation of ATPase activity,		GO:0001671~ATPase activator activity,GO:0051087~chaperone binding,	IPR015310:Activator of Hsp90 ATPase, N-terminal,			SM01000:SM01000,	Chaperone,Complete proteome,Reference proteome,Stress response,	chain:Activator of 90 kDa heat shock protein ATPase homolog 2,
F1MCK2	AHNAK nucleoprotein(AHNAK)	Bos taurus	Function unknown,	GO:0043484~regulation of RNA splicing,GO:0051259~protein oligomerization,GO:1901385~regulation of voltage-gated calcium channel activity,	GO:0005634~nucleus,GO:0005765~lysosomal membrane,GO:0005829~cytosol,GO:0005925~focal adhesion,GO:0015629~actin cytoskeleton,GO:0030315~T-tubule,GO:0043034~costamere,GO:0044291~cell-cell contact zone,GO:0045121~membrane raft,GO:0070062~extracellular exosome,	GO:0044822~poly(A) RNA binding,GO:0097493~structural molecule activity conferring elasticity,	IPR001478:PDZ domain,			SM00228:PDZ,	Complete proteome,Proteomics identification,Reference proteome,
G3X7B5	AKT serine/threonine kinase 1(AKT1)	Bos taurus		GO:0000060~protein import into nucleus, translocation,GO:0001649~osteoblast differentiation,GO:0001893~maternal placenta development,GO:0001938~positive regulation of endothelial cell proliferation,GO:0005977~glycogen metabolic process,GO:0005978~glycogen biosynthetic process,GO:0006006~glucose metabolic process,GO:0006417~regulation of translation,GO:0006468~protein phosphorylation,GO:0006469~ne…	GO:0005622~intracellular,GO:0005634~nucleus,GO:0005737~cytoplasm,GO:0005739~mitochondrion,GO:0005819~spindle,GO:0005829~cytosol,GO:0005886~plasma membrane,GO:0005911~cell-cell junction,GO:0031982~vesicle,GO:0036064~ciliary basal body,GO:0043234~protein complex,	GO:0004674~protein serine/threonine kinase activity,GO:0004712~protein serine/threonine/tyrosine kinase activity,GO:0005515~protein binding,GO:0005524~ATP binding,GO:0005547~phosphatidylinositol-3,4,5-trisphosphate binding,GO:0030235~nitric-oxide synthase regulator activity,GO:0043325~phosphatidylinositol-3,4-bisphosphate binding,	IPR000719:Protein kinase, catalytic domain,IPR000961:AGC-kinase, C-terminal,IPR001849:Pleckstrin homology domain,IPR008271:Serine/threonine-protein kinase, active site,IPR011009:Protein kinase-like domain,IPR011993:Pleckstrin homology-like domain,IPR017441:Protein kinase, ATP binding site,IPR017892:Protein kinase, C-terminal,	bta04010:MAPK signaling pathway,bta04012:ErbB signaling pathway,bta04014:Ras signaling pathway,bta04015:Rap1 signaling pathway,bta04022:cGMP-PKG signaling pathway,bta04024:cAMP signaling pathway,bta04062:Chemokine signaling pathway,bta04066:HIF-1 signaling pathway,bta04068:FoxO signaling pathway,bta04071:Sphingolipid signaling pathway,bta04150:mTOR signaling pathway,bta04151:PI3K-Akt signaling pa…		SM00133:S_TK_X,SM00220:S_TKc,SM00233:PH,	Acetylation,Apoptosis,ATP-binding,Carbohydrate metabolism,Cell membrane,Complete proteome,Cytoplasm,Developmental protein,Disulfide bond,Glucose metabolism,Glycogen biosynthesis,Glycogen metabolism,Glycoprotein,Isopeptide bond,Kinase,Membrane,Neurogenesis,Nucleotide-binding,Nucleus,Phosphoprotein,Reference proteome,Serine/threonine-protein kinase,Sugar transport,Transferase,Translation regulation…	active site:Proton acceptor,binding site:ATP,chain:RAC-alpha serine/threonine-protein kinase,domain:AGC-kinase C-terminal,domain:PH,domain:Protein kinase,modified residue,nucleotide phosphate-binding region:ATP,sequence conflict,
F1MYJ4	AKT serine/threonine kinase 3(AKT3)	Bos taurus		GO:0000002~mitochondrial genome maintenance,GO:0018105~peptidyl-serine phosphorylation,GO:0035556~intracellular signal transduction,	GO:0005622~intracellular,GO:0005654~nucleoplasm,GO:0005794~Golgi apparatus,GO:0005886~plasma membrane,	GO:0004674~protein serine/threonine kinase activity,GO:0005524~ATP binding,	IPR000719:Protein kinase, catalytic domain,IPR000961:AGC-kinase, C-terminal,IPR001849:Pleckstrin homology domain,IPR008271:Serine/threonine-protein kinase, active site,IPR011009:Protein kinase-like domain,IPR011993:Pleckstrin homology-like domain,IPR017441:Protein kinase, ATP binding site,IPR017892:Protein kinase, C-terminal,	bta04010:MAPK signaling pathway,bta04012:ErbB signaling pathway,bta04014:Ras signaling pathway,bta04015:Rap1 signaling pathway,bta04022:cGMP-PKG signaling pathway,bta04024:cAMP signaling pathway,bta04062:Chemokine signaling pathway,bta04066:HIF-1 signaling pathway,bta04068:FoxO signaling pathway,bta04071:Sphingolipid signaling pathway,bta04150:mTOR signaling pathway,bta04151:PI3K-Akt signaling pa…		SM00133:S_TK_X,SM00220:S_TKc,SM00233:PH,	ATP-binding,Complete proteome,Kinase,Nucleotide-binding,Reference proteome,Serine/threonine-protein kinase,Transferase,
A4FV21	ALG3, alpha-1,3- mannosyltransferase(ALG3)	Bos taurus			GO:0005789~endoplasmic reticulum membrane,GO:0016021~integral component of membrane,	GO:0000033~alpha-1,3-mannosyltransferase activity,	IPR007873:Glycosyltransferase, ALG3,	bta00510:N-Glycan biosynthesis,bta01100:Metabolic pathways,			Complete proteome,Membrane,Reference proteome,Transmembrane,Transmembrane helix,
V6F967	ALG9, alpha-1,2-mannosyltransferase(ALG9)	Bos taurus			GO:0005783~endoplasmic reticulum,GO:0005789~endoplasmic reticulum membrane,GO:0016021~integral component of membrane,	GO:0000030~mannosyltransferase activity,GO:0016757~transferase activity, transferring glycosyl groups,	IPR005599:GPI mannosyltransferase,IPR019446:Domain of unknown function DUF2431,	bta00510:N-Glycan biosynthesis,bta01100:Metabolic pathways,			Complete proteome,Endoplasmic reticulum,Glycosyltransferase,Membrane,Reference proteome,Transferase,Transmembrane,Transmembrane helix,
E1B958	ALMS1, centrosome and basal body associated protein(ALMS1)	Bos taurus		GO:0001736~establishment of planar polarity,GO:0006629~lipid metabolic process,GO:0007286~spermatid development,GO:0007605~sensory perception of sound,GO:0016197~endosomal transport,GO:0019722~calcium-mediated signaling,GO:0030728~ovulation,GO:0040015~negative regulation of multicellular organism growth,GO:0042384~cilium assembly,GO:0042593~glucose homeostasis,GO:0042632~cholesterol homeostasis,G…	GO:0005622~intracellular,GO:0031514~motile cilium,	GO:0051393~alpha-actinin binding,					Coiled coil,Complete proteome,Reference proteome,
A6QP75	ALS2 C-terminal like(ALS2CL)	Bos taurus	Function unknown,	GO:0007032~endosome organization,GO:0035023~regulation of Rho protein signal transduction,GO:0043547~positive regulation of GTPase activity,	GO:0005737~cytoplasm,	GO:0005089~Rho guanyl-nucleotide exchange factor activity,GO:0005096~GTPase activator activity,	IPR000219:Dbl homology (DH) domain,IPR003123:Vacuolar sorting protein 9,IPR003409:MORN motif,			SM00698:MORN,	Complete proteome,Cytoplasm,GTPase activation,Reference proteome,Repeat,	chain:ALS2 C-terminal-like protein,domain:VPS9,repeat:MORN 1,repeat:MORN 2,repeat:MORN 3,repeat:MORN 4,repeat:MORN 5,repeat:MORN 6,repeat:MORN 7,repeat:MORN 8,
F1MDF3	ALS2, alsin Rho guanine nucleotide exchange factor(ALS2)	Bos taurus	Cell division and chromosome partitioning / Cytoskeleton,Function unknown,	GO:0001662~behavioral fear response,GO:0001881~receptor recycling,GO:0006979~response to oxidative stress,GO:0007032~endosome organization,GO:0007528~neuromuscular junction development,GO:0007626~locomotory behavior,GO:0008104~protein localization,GO:0016050~vesicle organization,GO:0016197~endosomal transport,GO:0035023~regulation of Rho protein signal transduction,GO:0035249~synaptic transmissio…	GO:0001726~ruffle,GO:0005769~early endosome,GO:0005813~centrosome,GO:0005829~cytosol,GO:0014069~postsynaptic density,GO:0030027~lamellipodium,GO:0031982~vesicle,GO:0043197~dendritic spine,GO:0043234~protein complex,	GO:0017112~Rab guanyl-nucleotide exchange factor activity,GO:0030676~Rac guanyl-nucleotide exchange factor activity,GO:0043539~protein serine/threonine kinase activator activity,	IPR000219:Dbl homology (DH) domain,IPR000408:Regulator of chromosome condensation, RCC1,IPR003123:Vacuolar sorting protein 9,IPR003409:MORN motif,IPR009091:Regulator of chromosome condensation 1/beta-lactamase-inhibitor protein II,IPR011993:Pleckstrin homology-like domain,	bta05014:Amyotrophic lateral sclerosis (ALS),		SM00698:MORN,	Complete proteome,Reference proteome,Repeat,
E1BKK2	ALX homeobox 1(ALX1)	Bos taurus		GO:0000122~negative regulation of transcription from RNA polymerase II promoter,GO:0001755~neural crest cell migration,GO:0001843~neural tube closure,GO:0009952~anterior/posterior pattern specification,GO:0010718~positive regulation of epithelial to mesenchymal transition,GO:0030326~embryonic limb morphogenesis,GO:0048704~embryonic skeletal system morphogenesis,GO:0060021~palate development,	GO:0005654~nucleoplasm,GO:0005667~transcription factor complex,GO:0005794~Golgi apparatus,	GO:0000977~RNA polymerase II regulatory region sequence-specific DNA binding,GO:0001228~transcriptional activator activity, RNA polymerase II transcription regulatory region sequence-specific binding,	IPR001356:Homeodomain,IPR003654:OAR domain,IPR009057:Homeodomain-like,IPR017970:Homeobox, conserved site,			SM00389:HOX,	Complete proteome,Developmental protein,DNA-binding,Homeobox,Nucleus,Reference proteome,
Q4LAL6	ALX homeobox 4(ALX4)	Bos taurus		GO:0006351~transcription, DNA-templated,GO:0006357~regulation of transcription from RNA polymerase II promoter,GO:0007275~multicellular organism development,	GO:0005634~nucleus,	GO:0003700~transcription factor activity, sequence-specific DNA binding,GO:0043565~sequence-specific DNA binding,	IPR001356:Homeodomain,IPR003654:OAR domain,IPR009057:Homeodomain-like,IPR017970:Homeobox, conserved site,			SM00389:HOX,	Activator,Complete proteome,Developmental protein,DNA-binding,Homeobox,Nucleus,Phosphoprotein,Reference proteome,Transcription,Transcription regulation,	chain:Homeobox protein aristaless-like 4,DNA-binding region:Homeobox,short sequence motif:OAR,
A8E659	ANKH inorganic pyrophosphate transport regulator(ANKH)	Bos taurus		GO:0030500~regulation of bone mineralization,	GO:0005887~integral component of plasma membrane,GO:0016021~integral component of membrane,	GO:0005315~inorganic phosphate transmembrane transporter activity,GO:0015114~phosphate ion transmembrane transporter activity,GO:0030504~inorganic diphosphate transmembrane transporter activity,	IPR009887:Progressive ankylosis,				Complete proteome,Membrane,Reference proteome,Transmembrane,Transmembrane helix,
F1MNB8	APC down-regulated 1 like(APCDD1L)	Bos taurus								SM01352:SM01352,	Complete proteome,Reference proteome,
F1MRJ5	APC membrane recruitment protein 3(AMER3)	Bos taurus		GO:0048856~anatomical structure development,GO:0060828~regulation of canonical Wnt signaling pathway,	GO:0005886~plasma membrane,	GO:0005546~phosphatidylinositol-4,5-bisphosphate binding,GO:0008013~beta-catenin binding,	IPR019003:Uncharacterised protein family FAM123,				Complete proteome,Reference proteome,
F1MV51	APC, WNT signaling pathway regulator(APC)	Bos taurus		GO:0000281~mitotic cytokinesis,GO:0001708~cell fate specification,GO:0006974~cellular response to DNA damage stimulus,GO:0007026~negative regulation of microtubule depolymerization,GO:0007050~cell cycle arrest,GO:0007389~pattern specification process,GO:0008283~cell proliferation,GO:0008285~negative regulation of cell proliferation,GO:0016055~Wnt signaling pathway,GO:0016477~cell migration,GO:003…	GO:0005634~nucleus,GO:0005737~cytoplasm,GO:0030877~beta-catenin destruction complex,	GO:0008013~beta-catenin binding,GO:0045295~gamma-catenin binding,	IPR000225:Armadillo,IPR009223:Adenomatous polyposis coli protein, cysteine-rich repeat,IPR009224:SAMP,IPR009232:EB-1 binding,IPR009234:Adenomatous polyposis coli protein basic domain,IPR009240:Adenomatous polyposis coli protein, 15 residue repeat,IPR011989:Armadillo-like helical,IPR016024:Armadillo-type fold,IPR026818:Adenomatous polyposis coli (APC) family,IPR026831:Adenomatous polyposis coli do…	bta04310:Wnt signaling pathway,bta04390:Hippo signaling pathway,bta04550:Signaling pathways regulating pluripotency of stem cells,bta04810:Regulation of actin cytoskeleton,bta05166:HTLV-I infection,bta05200:Pathways in cancer,bta05206:MicroRNAs in cancer,bta05210:Colorectal cancer,bta05213:Endometrial cancer,bta05217:Basal cell carcinoma,		SM00185:ARM,	Coiled coil,Complete proteome,Reference proteome,
E1BI79	APC2, WNT signaling pathway regulator(APC2)	Bos taurus	Cell division and chromosome partitioning,	GO:0001708~cell fate specification,GO:0007026~negative regulation of microtubule depolymerization,GO:0007389~pattern specification process,GO:0008283~cell proliferation,GO:0016055~Wnt signaling pathway,GO:0016477~cell migration,GO:0035414~negative regulation of catenin import into nucleus,GO:0045595~regulation of cell differentiation,GO:0045732~positive regulation of protein catabolic process,GO:…	GO:0005794~Golgi apparatus,GO:0005881~cytoplasmic microtubule,GO:0005884~actin filament,GO:0016342~catenin complex,GO:0030877~beta-catenin destruction complex,GO:0031258~lamellipodium membrane,GO:0048471~perinuclear region of cytoplasm,	GO:0008013~beta-catenin binding,GO:0045295~gamma-catenin binding,	IPR000225:Armadillo,IPR009223:Adenomatous polyposis coli protein, cysteine-rich repeat,IPR009224:SAMP,IPR009234:Adenomatous polyposis coli protein basic domain,IPR011989:Armadillo-like helical,IPR016024:Armadillo-type fold,IPR026818:Adenomatous polyposis coli (APC) family,IPR026831:Adenomatous polyposis coli domain,IPR026837:Adenomatous polyposis coli 2,	bta04310:Wnt signaling pathway,bta04390:Hippo signaling pathway,bta04550:Signaling pathways regulating pluripotency of stem cells,bta04810:Regulation of actin cytoskeleton,bta05166:HTLV-I infection,bta05200:Pathways in cancer,bta05206:MicroRNAs in cancer,bta05210:Colorectal cancer,bta05213:Endometrial cancer,bta05217:Basal cell carcinoma,		SM00185:ARM,	Complete proteome,Reference proteome,
E1BPS4	ARFGEF family member 3(ARFGEF3)	Bos taurus		GO:0010923~negative regulation of phosphatase activity,GO:0032012~regulation of ARF protein signal transduction,		GO:0005086~ARF guanyl-nucleotide exchange factor activity,	IPR000904:SEC7-like,IPR015403:Domain of unknown function DUF1981, SEC7 associated,IPR016024:Armadillo-type fold,			SM00222:Sec7,	Complete proteome,Reference proteome,
F2Z4F0	ARP1 actin-related protein 1 homolog A, centractin alpha(ACTR1A)	Bos taurus			GO:0005737~cytoplasm,GO:0005813~centrosome,GO:0005869~dynactin complex,GO:0043209~myelin sheath,GO:0070062~extracellular exosome,GO:1990752~microtubule end,	GO:0005524~ATP binding,	IPR004000:Actin-related protein,IPR004001:Actin, conserved site,IPR020902:Actin/actin-like conserved site,			SM00268:ACTIN,	ATP-binding,Complete proteome,Nucleotide-binding,Proteomics identification,Reference proteome,
A7MB62	ARP2 actin related protein 2 homolog(ACTR2)	Bos taurus		GO:0007163~establishment or maintenance of cell polarity,GO:0008356~asymmetric cell division,GO:0016344~meiotic chromosome movement towards spindle pole,GO:0016482~cytosolic transport,GO:0033206~meiotic cytokinesis,GO:0034314~Arp2/3 complex-mediated actin nucleation,GO:0042384~cilium assembly,GO:0051653~spindle localization,	GO:0005829~cytosol,GO:0005885~Arp2/3 protein complex,GO:0005925~focal adhesion,GO:0016020~membrane,GO:0030478~actin cap,GO:0042995~cell projection,GO:0070062~extracellular exosome,	GO:0003779~actin binding,GO:0005200~structural constituent of cytoskeleton,GO:0005515~protein binding,GO:0005524~ATP binding,	IPR004000:Actin-related protein,IPR020902:Actin/actin-like conserved site,IPR027306:Actin-related protein 2 (Arp2),			SM00268:ACTIN,	3D-structure,Acetylation,Actin-binding,ATP-binding,Cell projection,Complete proteome,Cytoplasm,Cytoskeleton,Nucleotide-binding,Proteomics identification,Reference proteome,	chain:Actin-related protein 2,helix,modified residue,nucleotide phosphate-binding region:ATP,strand,turn,
G3N1W1	ARP5 actin-related protein 5 homolog(ACTR5)	Bos taurus		GO:0006302~double-strand break repair,GO:0006355~regulation of transcription, DNA-templated,GO:0070914~UV-damage excision repair,	GO:0005737~cytoplasm,GO:0031011~Ino80 complex,		IPR004000:Actin-related protein,IPR004001:Actin, conserved site,			SM00268:ACTIN,	Coiled coil,Complete proteome,Reference proteome,
A6H7G6	ARP6 actin-related protein 6 homolog(ACTR6)	Bos taurus		GO:0006338~chromatin remodeling,	GO:0005634~nucleus,		IPR004000:Actin-related protein,			SM00268:ACTIN,	Complete proteome,Reference proteome,
Q1LZF2	ARP8 actin-related protein 8 homolog(ACTR8)	Bos taurus		GO:0006281~DNA repair,GO:0006310~DNA recombination,GO:0006338~chromatin remodeling,GO:0006351~transcription, DNA-templated,GO:0006355~regulation of transcription, DNA-templated,GO:0007067~mitotic nuclear division,GO:0051301~cell division,	GO:0005813~centrosome,GO:0031011~Ino80 complex,	GO:0005524~ATP binding,	IPR004000:Actin-related protein,			SM00268:ACTIN,	Acetylation,ATP-binding,Cell cycle,Cell division,Chromosome,Complete proteome,DNA damage,DNA recombination,DNA repair,Mitosis,Nucleotide-binding,Nucleus,Phosphoprotein,Reference proteome,Transcription,Transcription regulation,	chain:Actin-related protein 8,modified residue,
E1BE19	AT-hook DNA binding motif containing 1(AHDC1)	Bos taurus									Complete proteome,Reference proteome,
F1MNL8	AT-hook containing transcription factor 1(AHCTF1)	Bos taurus		GO:0000910~cytokinesis,GO:0051292~nuclear pore complex assembly,	GO:0000777~condensed chromosome kinetochore,GO:0000785~chromatin,GO:0005737~cytoplasm,GO:0016363~nuclear matrix,GO:0031080~nuclear pore outer ring,GO:0031965~nuclear membrane,GO:0034399~nuclear periphery,GO:0070062~extracellular exosome,	GO:0003700~transcription factor activity, sequence-specific DNA binding,	IPR025151:ELYS-like domain,				Complete proteome,Reference proteome,
E1B925	AT-rich interaction domain 1A(ARID1A)	Bos taurus		GO:0000122~negative regulation of transcription from RNA polymerase II promoter,GO:0001843~neural tube closure,GO:0003205~cardiac chamber development,GO:0003408~optic cup formation involved in camera-type eye development,GO:0006337~nucleosome disassembly,GO:0006344~maintenance of chromatin silencing,GO:0030520~intracellular estrogen receptor signaling pathway,GO:0030521~androgen receptor signalin…	GO:0000790~nuclear chromatin,GO:0005654~nucleoplasm,GO:0016514~SWI/SNF complex,GO:0071564~npBAF complex,GO:0071565~nBAF complex,	GO:0003677~DNA binding,	IPR001606:ARID/BRIGHT DNA-binding domain,IPR016024:Armadillo-type fold,IPR021906:Protein of unknown function DUF3518,			SM00501:BRIGHT,	Complete proteome,Proteomics identification,Reference proteome,
E1BKQ8	AT-rich interaction domain 1B(ARID1B)	Bos taurus		GO:0006338~chromatin remodeling,	GO:0005654~nucleoplasm,GO:0005737~cytoplasm,GO:0016021~integral component of membrane,GO:0016514~SWI/SNF complex,GO:0071565~nBAF complex,	GO:0003677~DNA binding,	IPR001606:ARID/BRIGHT DNA-binding domain,IPR011989:Armadillo-like helical,IPR016024:Armadillo-type fold,IPR021906:Protein of unknown function DUF3518,			SM00501:BRIGHT,	Coiled coil,Complete proteome,Membrane,Reference proteome,Transmembrane,Transmembrane helix,
F1N463	AT-rich interaction domain 2(ARID2)	Bos taurus		GO:0006337~nucleosome disassembly,GO:0006355~regulation of transcription, DNA-templated,	GO:0005654~nucleoplasm,GO:0005886~plasma membrane,GO:0090544~BAF-type complex,	GO:0003677~DNA binding,GO:0046872~metal ion binding,	IPR003150:DNA-binding RFX-type winged-helix domain,IPR007087:Zinc finger, C2H2,IPR011991:Winged helix-turn-helix DNA-binding domain,IPR016024:Armadillo-type fold,				Complete proteome,Reference proteome,
E1BGZ3	AT-rich interaction domain 3A(ARID3A)	Bos taurus			GO:0005634~nucleus,GO:0005654~nucleoplasm,GO:0005730~nucleolus,GO:0005794~Golgi apparatus,GO:0045121~membrane raft,	GO:0000977~RNA polymerase II regulatory region sequence-specific DNA binding,GO:0001228~transcriptional activator activity, RNA polymerase II transcription regulatory region sequence-specific binding,GO:0003682~chromatin binding,	IPR001606:ARID/BRIGHT DNA-binding domain,IPR023334:REKLES domain,			SM00501:BRIGHT,	Complete proteome,Reference proteome,
E1BI80	AT-rich interaction domain 3B(ARID3B)	Bos taurus			GO:0005634~nucleus,GO:0005654~nucleoplasm,	GO:0000977~RNA polymerase II regulatory region sequence-specific DNA binding,GO:0000978~RNA polymerase II core promoter proximal region sequence-specific DNA binding,GO:0000980~RNA polymerase II distal enhancer sequence-specific DNA binding,GO:0001077~transcriptional activator activity, RNA polymerase II core promoter proximal region sequence-specific binding,GO:0001205~transcriptional activator …	IPR001606:ARID/BRIGHT DNA-binding domain,IPR023334:REKLES domain,			SM00501:BRIGHT,	Complete proteome,Reference proteome,
F1MGP2	AT-rich interaction domain 3C(ARID3C)	Bos taurus			GO:0005634~nucleus,GO:0005737~cytoplasm,GO:0045121~membrane raft,	GO:0000977~RNA polymerase II regulatory region sequence-specific DNA binding,GO:0001228~transcriptional activator activity, RNA polymerase II transcription regulatory region sequence-specific binding,GO:0003677~DNA binding,GO:0003682~chromatin binding,	IPR001606:ARID/BRIGHT DNA-binding domain,IPR023334:REKLES domain,			SM00501:BRIGHT,	Complete proteome,Reference proteome,
F1MNB5	AT-rich interaction domain 4B(ARID4B)	Bos taurus		GO:0006349~regulation of gene expression by genetic imprinting,GO:0006355~regulation of transcription, DNA-templated,GO:0006357~regulation of transcription from RNA polymerase II promoter,GO:0007283~spermatogenesis,GO:0034773~histone H4-K20 trimethylation,GO:0036124~histone H3-K9 trimethylation,GO:0045944~positive regulation of transcription from RNA polymerase II promoter,GO:0097368~establishmen…	GO:0005634~nucleus,	GO:0003677~DNA binding,GO:0044212~transcription regulatory region DNA binding,	IPR001606:ARID/BRIGHT DNA-binding domain,IPR002999:Tudor domain,IPR012603:RBB1NT,IPR016197:Chromo domain-like,IPR025995:RNA binding activity-knot of a chromodomain,			SM00333:TUDOR,SM00501:BRIGHT,	Coiled coil,Complete proteome,Reference proteome,
G3MY61	AT-rich interaction domain 5A(ARID5A)	Bos taurus		GO:0006351~transcription, DNA-templated,GO:0006357~regulation of transcription from RNA polymerase II promoter,	GO:0005634~nucleus,GO:0005654~nucleoplasm,GO:0005730~nucleolus,	GO:0003677~DNA binding,GO:0044212~transcription regulatory region DNA binding,	IPR001606:ARID/BRIGHT DNA-binding domain,			SM00501:BRIGHT,	Complete proteome,DNA-binding,Nucleus,Phosphoprotein,Reference proteome,Repressor,Transcription,Transcription regulation,	chain:AT-rich interactive domain-containing protein 5A,domain:ARID,modified residue,
E1BLP6	AT-rich interaction domain 5B(ARID5B)	Bos taurus		GO:0001822~kidney development,GO:0006351~transcription, DNA-templated,GO:0006357~regulation of transcription from RNA polymerase II promoter,GO:0006807~nitrogen compound metabolic process,GO:0008584~male gonad development,GO:0008585~female gonad development,GO:0009791~post-embryonic development,GO:0010761~fibroblast migration,GO:0030325~adrenal gland development,GO:0035264~multicellular organism …	GO:0005634~nucleus,	GO:0000977~RNA polymerase II regulatory region sequence-specific DNA binding,GO:0001227~transcriptional repressor activity, RNA polymerase II transcription regulatory region sequence-specific binding,GO:0003713~transcription coactivator activity,GO:0044212~transcription regulatory region DNA binding,	IPR001606:ARID/BRIGHT DNA-binding domain,			SM00501:BRIGHT,	Activator,Complete proteome,DNA-binding,Isopeptide bond,Methylation,Nucleus,Phosphoprotein,Reference proteome,Transcription,Transcription regulation,Ubl conjugation,
A2VE75	ATCAY, caytaxin(ATCAY)	Bos taurus		GO:0006915~apoptotic process,GO:0031175~neuron projection development,GO:0032880~regulation of protein localization,GO:2000212~negative regulation of glutamate metabolic process,	GO:0016021~integral component of membrane,GO:0031966~mitochondrial membrane,GO:0043005~neuron projection,		IPR001251:CRAL-TRIO domain,IPR022181:Bcl2-/adenovirus E1B 19kDa-interacting protein 2,			SM00516:SEC14,	Complete proteome,Membrane,Reference proteome,Transmembrane,Transmembrane helix,
F1MEP8	ATM interactor(ATMIN)	Bos taurus		GO:0045893~positive regulation of transcription, DNA-templated,GO:0060271~cilium morphogenesis,	GO:0005634~nucleus,	GO:0044212~transcription regulatory region DNA binding,GO:0046872~metal ion binding,	IPR007087:Zinc finger, C2H2,IPR015880:Zinc finger, C2H2-like,			SM00355:ZnF_C2H2,	Complete proteome,Reference proteome,
E1BEI6	ATM serine/threonine kinase(ATM)	Bos taurus		GO:0000724~double-strand break repair via homologous recombination,GO:0001756~somitogenesis,GO:0002331~pre-B cell allelic exclusion,GO:0006281~DNA repair,GO:0006975~DNA damage induced protein phosphorylation,GO:0007004~telomere maintenance via telomerase,GO:0007050~cell cycle arrest,GO:0007094~mitotic spindle assembly checkpoint,GO:0007420~brain development,GO:0007507~heart development,GO:0008340…	GO:0000781~chromosome, telomeric region,GO:0005634~nucleus,GO:0005819~spindle,GO:1990391~DNA repair complex,	GO:0004677~DNA-dependent protein kinase activity,GO:0005524~ATP binding,GO:0016301~kinase activity,GO:0016303~1-phosphatidylinositol-3-kinase activity,	IPR000403:Phosphatidylinositol 3-/4-kinase, catalytic domain,IPR003151:PIK-related kinase, FAT,IPR003152:PIK-related kinase, FATC,IPR011009:Protein kinase-like domain,IPR014009:PIK-related kinase,IPR015519:ATM/Tel1,IPR016024:Armadillo-type fold,IPR018936:Phosphatidylinositol 3/4-kinase, conserved site,IPR021668:Telomere-length maintenance and DNA damage repair,	bta04064:NF-kappa B signaling pathway,bta04068:FoxO signaling pathway,bta04110:Cell cycle,bta04115:p53 signaling pathway,bta04210:Apoptosis,bta05166:HTLV-I infection,bta05202:Transcriptional misregulation in cancer,bta05206:MicroRNAs in cancer,		SM00146:PI3Kc,SM01342:SM01342,SM01343:SM01343,	ATP-binding,Coiled coil,Complete proteome,Kinase,Nucleotide-binding,Reference proteome,Transferase,
F1MG24, Q4TTZ1	ATP binding cassette subfamily A member 1(ABCA1)	Bos taurus		GO:0002790~peptide secretion,GO:0006497~protein lipidation,GO:0006869~lipid transport,GO:0006911~phagocytosis, engulfment,GO:0007040~lysosome organization,GO:0007186~G-protein coupled receptor signaling pathway,GO:0008203~cholesterol metabolic process,GO:0010875~positive regulation of cholesterol efflux,GO:0016197~endosomal transport,GO:0030819~positive regulation of cAMP biosynthetic process,GO:…	GO:0005794~Golgi apparatus,GO:0005887~integral component of plasma membrane,GO:0009897~external side of plasma membrane,GO:0043231~intracellular membrane-bounded organelle,GO:0045121~membrane raft,GO:0045335~phagocytic vesicle,GO:0048471~perinuclear region of cytoplasm,	GO:0005215~transporter activity,GO:0005524~ATP binding,GO:0005548~phospholipid transporter activity,GO:0008509~anion transmembrane transporter activity,GO:0016887~ATPase activity,GO:0017127~cholesterol transporter activity,GO:0034188~apolipoprotein A-I receptor activity,GO:0042626~ATPase activity, coupled to transmembrane movement of substances,	IPR003439:ABC transporter-like,IPR003593:AAA+ ATPase domain,IPR017871:ABC transporter, conserved site,IPR026082:ABC transporter A, ABCA,IPR027417:P-loop containing nucleoside triphosphate hydrolase,	bta02010:ABC transporters,bta04975:Fat digestion and absorption,		SM00382:AAA,	ATP-binding,Complete proteome,Membrane,Nucleotide-binding,Reference proteome,Transmembrane,Transmembrane helix,
G5E556	ATP binding cassette subfamily A member 12(ABCA12)	Bos taurus		GO:0010875~positive regulation of cholesterol efflux,GO:0031424~keratinization,GO:0033344~cholesterol efflux,GO:0033700~phospholipid efflux,GO:0035627~ceramide transport,GO:0043129~surfactant homeostasis,GO:0045055~regulated exocytosis,GO:0048286~lung alveolus development,GO:0055088~lipid homeostasis,GO:0061436~establishment of skin barrier,GO:0072659~protein localization to plasma membrane,GO:20…	GO:0005743~mitochondrial inner membrane,GO:0005829~cytosol,GO:0005886~plasma membrane,GO:0016021~integral component of membrane,GO:0043231~intracellular membrane-bounded organelle,GO:0097209~epidermal lamellar body,	GO:0005319~lipid transporter activity,GO:0005524~ATP binding,GO:0042626~ATPase activity, coupled to transmembrane movement of substances,	IPR003439:ABC transporter-like,IPR003593:AAA+ ATPase domain,IPR017871:ABC transporter, conserved site,IPR026082:ABC transporter A, ABCA,IPR027417:P-loop containing nucleoside triphosphate hydrolase,	bta02010:ABC transporters,		SM00382:AAA,	ATP-binding,Coiled coil,Complete proteome,Membrane,Nucleotide-binding,Reference proteome,Transmembrane,Transmembrane helix,
G3N055	ATP binding cassette subfamily A member 2(ABCA2)	Bos taurus		GO:0006357~regulation of transcription from RNA polymerase II promoter,GO:0032383~regulation of intracellular cholesterol transport,GO:0033344~cholesterol efflux,GO:0033700~phospholipid efflux,GO:0042632~cholesterol homeostasis,GO:0048545~response to steroid hormone,	GO:0005764~lysosome,GO:0005768~endosome,GO:0016021~integral component of membrane,GO:0043231~intracellular membrane-bounded organelle,	GO:0005215~transporter activity,GO:0005524~ATP binding,GO:0016887~ATPase activity,GO:0042626~ATPase activity, coupled to transmembrane movement of substances,	IPR003439:ABC transporter-like,IPR003593:AAA+ ATPase domain,IPR017871:ABC transporter, conserved site,IPR026082:ABC transporter A, ABCA,IPR027417:P-loop containing nucleoside triphosphate hydrolase,	bta02010:ABC transporters,bta04142:Lysosome,		SM00382:AAA,	ATP-binding,Complete proteome,Membrane,Nucleotide-binding,Reference proteome,Signal,Transmembrane,Transmembrane helix,
E1BCR1	ATP binding cassette subfamily A member 3(ABCA3)	Bos taurus		GO:0006869~lipid transport,	GO:0005615~extracellular space,GO:0005886~plasma membrane,GO:0016021~integral component of membrane,GO:0043231~intracellular membrane-bounded organelle,GO:0097233~alveolar lamellar body membrane,	GO:0005524~ATP binding,GO:0042626~ATPase activity, coupled to transmembrane movement of substances,	IPR003439:ABC transporter-like,IPR003593:AAA+ ATPase domain,IPR017871:ABC transporter, conserved site,IPR026082:ABC transporter A, ABCA,IPR026969:ATP-binding cassette sub-family A member 3,IPR027417:P-loop containing nucleoside triphosphate hydrolase,	bta02010:ABC transporters,		SM00382:AAA,	ATP-binding,Complete proteome,Membrane,Nucleotide-binding,Reference proteome,Transmembrane,Transmembrane helix,
O02698	ATP binding cassette subfamily A member 4(ABCA4)	Bos taurus		GO:0001523~retinoid metabolic process,GO:0006649~phospholipid transfer to membrane,GO:0006869~lipid transport,GO:0007601~visual perception,GO:0045494~photoreceptor cell maintenance,	GO:0001750~photoreceptor outer segment,GO:0005887~integral component of plasma membrane,GO:0042622~photoreceptor outer segment membrane,GO:0043231~intracellular membrane-bounded organelle,	GO:0004012~phospholipid-translocating ATPase activity,GO:0005395~eye pigment precursor transporter activity,GO:0005524~ATP binding,GO:0042626~ATPase activity, coupled to transmembrane movement of substances,	IPR003439:ABC transporter-like,IPR003593:AAA+ ATPase domain,IPR005951:Rim ABC transporter,IPR026082:ABC transporter A, ABCA,IPR027417:P-loop containing nucleoside triphosphate hydrolase,	bta02010:ABC transporters,		SM00382:AAA,	Complete proteome,Membrane,Reference proteome,Transmembrane,Transmembrane helix,
E1BKP0	ATP binding cassette subfamily A member 5(ABCA5)	Bos taurus	Energy production and conversion / Inorganic ion transport and metabolism,	GO:0006869~lipid transport,GO:0010745~negative regulation of macrophage derived foam cell differentiation,GO:0033344~cholesterol efflux,GO:0034375~high-density lipoprotein particle remodeling,	GO:0005764~lysosome,GO:0005770~late endosome,GO:0016021~integral component of membrane,GO:0043231~intracellular membrane-bounded organelle,	GO:0005524~ATP binding,GO:0042626~ATPase activity, coupled to transmembrane movement of substances,	IPR003439:ABC transporter-like,IPR003593:AAA+ ATPase domain,IPR017871:ABC transporter, conserved site,IPR026082:ABC transporter A, ABCA,IPR027417:P-loop containing nucleoside triphosphate hydrolase,	bta02010:ABC transporters,		SM00382:AAA,	ATP-binding,Complete proteome,Membrane,Nucleotide-binding,Reference proteome,Transmembrane,Transmembrane helix,
F1MYG7	ATP binding cassette subfamily A member 6(ABCA6)	Bos taurus		GO:0006869~lipid transport,	GO:0016021~integral component of membrane,GO:0043231~intracellular membrane-bounded organelle,	GO:0005524~ATP binding,GO:0042626~ATPase activity, coupled to transmembrane movement of substances,	IPR003439:ABC transporter-like,IPR003593:AAA+ ATPase domain,IPR020846:Major facilitator superfamily domain,IPR027417:P-loop containing nucleoside triphosphate hydrolase,	bta02010:ABC transporters,		SM00382:AAA,	Complete proteome,Membrane,Reference proteome,Transmembrane,Transmembrane helix,
E1BCG1	ATP binding cassette subfamily A member 7(ABCA7)	Bos taurus		GO:0006869~lipid transport,GO:0006909~phagocytosis,GO:0007613~memory,GO:0010875~positive regulation of cholesterol efflux,GO:0017121~phospholipid scrambling,GO:0018149~peptide cross-linking,GO:0032780~negative regulation of ATPase activity,GO:0032781~positive regulation of ATPase activity,GO:0033344~cholesterol efflux,GO:0033700~phospholipid efflux,GO:0034380~high-density lipoprotein particle ass…	GO:0001891~phagocytic cup,GO:0005794~Golgi apparatus,GO:0009986~cell surface,GO:0016021~integral component of membrane,GO:0016324~apical plasma membrane,GO:0030054~cell junction,GO:0032587~ruffle membrane,GO:0043231~intracellular membrane-bounded organelle,	GO:0005524~ATP binding,GO:0005548~phospholipid transporter activity,GO:0034188~apolipoprotein A-I receptor activity,GO:0042626~ATPase activity, coupled to transmembrane movement of substances,	IPR003439:ABC transporter-like,IPR003593:AAA+ ATPase domain,IPR017871:ABC transporter, conserved site,IPR026082:ABC transporter A, ABCA,IPR027417:P-loop containing nucleoside triphosphate hydrolase,	bta02010:ABC transporters,		SM00382:AAA,	ATP-binding,Complete proteome,Membrane,Nucleotide-binding,Reference proteome,Transmembrane,Transmembrane helix,
A6QR66	ATP binding cassette subfamily A member 9(ABCA9)	Bos taurus	Defense mechanisms,	GO:0006869~lipid transport,	GO:0005743~mitochondrial inner membrane,GO:0016021~integral component of membrane,	GO:0005215~transporter activity,GO:0005524~ATP binding,GO:0016887~ATPase activity,GO:0042626~ATPase activity, coupled to transmembrane movement of substances,	IPR003439:ABC transporter-like,IPR003593:AAA+ ATPase domain,IPR017871:ABC transporter, conserved site,IPR026082:ABC transporter A, ABCA,IPR027417:P-loop containing nucleoside triphosphate hydrolase,	bta02010:ABC transporters,		SM00382:AAA,	ATP-binding,Complete proteome,Membrane,Nucleotide-binding,Reference proteome,Transmembrane,Transmembrane helix,
G3X771	ATP binding cassette subfamily B member 1(ABCB1)	Bos taurus	Defense mechanisms,	GO:0002481~antigen processing and presentation of exogenous protein antigen via MHC class Ib, TAP-dependent,GO:0002485~antigen processing and presentation of endogenous peptide antigen via MHC class I via ER pathway, TAP-dependent,GO:0002489~antigen processing and presentation of endogenous peptide antigen via MHC class Ib via ER pathway, TAP-dependent,GO:0002591~positive regulation of antigen pr…	GO:0016021~integral component of membrane,	GO:0005524~ATP binding,GO:0016887~ATPase activity,GO:0042626~ATPase activity, coupled to transmembrane movement of substances,	IPR003439:ABC transporter-like,IPR003593:AAA+ ATPase domain,IPR011527:ABC transporter, transmembrane domain, type 1,IPR017871:ABC transporter, conserved site,IPR027417:P-loop containing nucleoside triphosphate hydrolase,	bta02010:ABC transporters,bta04976:Bile secretion,bta05206:MicroRNAs in cancer,		SM00382:AAA,	ATP-binding,Complete proteome,Membrane,Nucleotide-binding,Reference proteome,Repeat,Transmembrane,Transmembrane helix,
E1BL88	ATP binding cassette subfamily B member 10(ABCB10)	Bos taurus		GO:0055085~transmembrane transport,	GO:0005743~mitochondrial inner membrane,GO:0016021~integral component of membrane,GO:0032592~integral component of mitochondrial membrane,	GO:0005524~ATP binding,GO:0042626~ATPase activity, coupled to transmembrane movement of substances,	IPR003439:ABC transporter-like,IPR003593:AAA+ ATPase domain,IPR011527:ABC transporter, transmembrane domain, type 1,IPR017871:ABC transporter, conserved site,IPR027417:P-loop containing nucleoside triphosphate hydrolase,	bta02010:ABC transporters,		SM00382:AAA,	ATP-binding,Complete proteome,Membrane,Nucleotide-binding,Reference proteome,Transmembrane,Transmembrane helix,
E1BGI0	ATP binding cassette subfamily B member 11(ABCB11)	Bos taurus	Defense mechanisms,	GO:0015722~canalicular bile acid transport,	GO:0016021~integral component of membrane,GO:0045177~apical part of cell,GO:0046581~intercellular canaliculus,GO:0070062~extracellular exosome,	GO:0005524~ATP binding,GO:0015126~canalicular bile acid transmembrane transporter activity,GO:0042626~ATPase activity, coupled to transmembrane movement of substances,	IPR003439:ABC transporter-like,IPR003593:AAA+ ATPase domain,IPR011527:ABC transporter, transmembrane domain, type 1,IPR017871:ABC transporter, conserved site,IPR027417:P-loop containing nucleoside triphosphate hydrolase,	bta02010:ABC transporters,bta04976:Bile secretion,		SM00382:AAA,	ATP-binding,Complete proteome,Membrane,Nucleotide-binding,Reference proteome,Repeat,Transmembrane,Transmembrane helix,
F1MC51	ATP binding cassette subfamily B member 5(ABCB5)	Bos taurus	Defense mechanisms,	GO:0002481~antigen processing and presentation of exogenous protein antigen via MHC class Ib, TAP-dependent,GO:0002485~antigen processing and presentation of endogenous peptide antigen via MHC class I via ER pathway, TAP-dependent,GO:0002489~antigen processing and presentation of endogenous peptide antigen via MHC class Ib via ER pathway, TAP-dependent,GO:0002591~positive regulation of antigen pr…	GO:0005887~integral component of plasma membrane,GO:0016021~integral component of membrane,	GO:0005524~ATP binding,GO:0015562~efflux transmembrane transporter activity,GO:0042626~ATPase activity, coupled to transmembrane movement of substances,	IPR003439:ABC transporter-like,IPR003593:AAA+ ATPase domain,IPR011527:ABC transporter, transmembrane domain, type 1,IPR017871:ABC transporter, conserved site,IPR027417:P-loop containing nucleoside triphosphate hydrolase,	bta02010:ABC transporters,		SM00382:AAA,	ATP-binding,Complete proteome,Membrane,Nucleotide-binding,Reference proteome,Repeat,Transmembrane,Transmembrane helix,
A5D7P7	ATP binding cassette subfamily B member 6 (Langereis blood group)(ABCB6)	Bos taurus	Posttranslational modification, protein turnover, chaperones,	GO:0006779~porphyrin-containing compound biosynthetic process,GO:0006879~cellular iron ion homeostasis,GO:0007420~brain development,GO:0043588~skin development,GO:0055085~transmembrane transport,	GO:0005743~mitochondrial inner membrane,GO:0005768~endosome,GO:0005783~endoplasmic reticulum,GO:0005794~Golgi apparatus,GO:0005886~plasma membrane,GO:0016021~integral component of membrane,GO:0031307~integral component of mitochondrial outer membrane,GO:0070062~extracellular exosome,	GO:0005524~ATP binding,GO:0015439~heme-transporting ATPase activity,GO:0015562~efflux transmembrane transporter activity,GO:0020037~heme binding,GO:0042626~ATPase activity, coupled to transmembrane movement of substances,	IPR003439:ABC transporter-like,IPR003593:AAA+ ATPase domain,IPR011527:ABC transporter, transmembrane domain, type 1,IPR017871:ABC transporter, conserved site,IPR027417:P-loop containing nucleoside triphosphate hydrolase,	bta02010:ABC transporters,		SM00382:AAA,	ATP-binding,Complete proteome,Membrane,Nucleotide-binding,Reference proteome,Transmembrane,Transmembrane helix,
E1BPL3	ATP binding cassette subfamily B member 7(ABCB7)	Bos taurus	Posttranslational modification, protein turnover, chaperones,	GO:0006879~cellular iron ion homeostasis,GO:0055085~transmembrane transport,	GO:0005743~mitochondrial inner membrane,GO:0016021~integral component of membrane,	GO:0005524~ATP binding,GO:0042626~ATPase activity, coupled to transmembrane movement of substances,	IPR003439:ABC transporter-like,IPR003593:AAA+ ATPase domain,IPR011527:ABC transporter, transmembrane domain, type 1,IPR017871:ABC transporter, conserved site,IPR027417:P-loop containing nucleoside triphosphate hydrolase,	bta02010:ABC transporters,		SM00382:AAA,	ATP-binding,Complete proteome,Membrane,Nucleotide-binding,Reference proteome,Transmembrane,Transmembrane helix,
G3MYQ9	ATP binding cassette subfamily B member 8(ABCB8)	Bos taurus		GO:0055085~transmembrane transport,	GO:0005730~nucleolus,GO:0005739~mitochondrion,GO:0016021~integral component of membrane,	GO:0005524~ATP binding,GO:0042626~ATPase activity, coupled to transmembrane movement of substances,	IPR003439:ABC transporter-like,IPR003593:AAA+ ATPase domain,IPR011527:ABC transporter, transmembrane domain, type 1,IPR017871:ABC transporter, conserved site,IPR027417:P-loop containing nucleoside triphosphate hydrolase,	bta02010:ABC transporters,		SM00382:AAA,	ATP-binding,Complete proteome,Membrane,Nucleotide-binding,Reference proteome,Transmembrane,Transmembrane helix,
E1BNL1	ATP binding cassette subfamily C member 10(ABCC10)	Bos taurus	Defense mechanisms,		GO:0005765~lysosomal membrane,GO:0016021~integral component of membrane,	GO:0005524~ATP binding,GO:0042626~ATPase activity, coupled to transmembrane movement of substances,	IPR003439:ABC transporter-like,IPR003593:AAA+ ATPase domain,IPR011527:ABC transporter, transmembrane domain, type 1,IPR017871:ABC transporter, conserved site,IPR027417:P-loop containing nucleoside triphosphate hydrolase,	bta02010:ABC transporters,		SM00382:AAA,	ATP-binding,Complete proteome,Membrane,Nucleotide-binding,Reference proteome,Repeat,Transmembrane,Transmembrane helix,
E1BM99	ATP binding cassette subfamily C member 12(ABCC12)	Bos taurus	Defense mechanisms,		GO:0005739~mitochondrion,GO:0016021~integral component of membrane,	GO:0005524~ATP binding,GO:0042626~ATPase activity, coupled to transmembrane movement of substances,	IPR003439:ABC transporter-like,IPR003593:AAA+ ATPase domain,IPR011527:ABC transporter, transmembrane domain, type 1,IPR017871:ABC transporter, conserved site,IPR027417:P-loop containing nucleoside triphosphate hydrolase,	bta02010:ABC transporters,		SM00382:AAA,	ATP-binding,Complete proteome,Membrane,Nucleotide-binding,Reference proteome,Repeat,Transmembrane,Transmembrane helix,
F1MIP7	ATP binding cassette subfamily C member 2(ABCC2)	Bos taurus			GO:0005887~integral component of plasma membrane,GO:0009986~cell surface,GO:0016324~apical plasma membrane,	GO:0005524~ATP binding,GO:0008514~organic anion transmembrane transporter activity,GO:0042626~ATPase activity, coupled to transmembrane movement of substances,	IPR003439:ABC transporter-like,IPR003593:AAA+ ATPase domain,IPR005292:Multi drug resistance-associated protein,IPR011527:ABC transporter, transmembrane domain, type 1,IPR017871:ABC transporter, conserved site,IPR027417:P-loop containing nucleoside triphosphate hydrolase,	bta02010:ABC transporters,bta04976:Bile secretion,		SM00382:AAA,	ATP-binding,Complete proteome,Membrane,Nucleotide-binding,Reference proteome,Repeat,Transmembrane,Transmembrane helix,
F1N3Y6	ATP binding cassette subfamily C member 3(ABCC3)	Bos taurus			GO:0005887~integral component of plasma membrane,	GO:0005524~ATP binding,GO:0042626~ATPase activity, coupled to transmembrane movement of substances,	IPR003439:ABC transporter-like,IPR003593:AAA+ ATPase domain,IPR005292:Multi drug resistance-associated protein,IPR011527:ABC transporter, transmembrane domain, type 1,IPR017871:ABC transporter, conserved site,IPR027417:P-loop containing nucleoside triphosphate hydrolase,	bta02010:ABC transporters,bta04976:Bile secretion,		SM00382:AAA,	ATP-binding,Complete proteome,Membrane,Nucleotide-binding,Reference proteome,Repeat,Transmembrane,Transmembrane helix,
G5E626	ATP binding cassette subfamily C member 6(ABCC6)	Bos taurus			GO:0005634~nucleus,GO:0005886~plasma membrane,GO:0016021~integral component of membrane,	GO:0005524~ATP binding,GO:0042626~ATPase activity, coupled to transmembrane movement of substances,	IPR003439:ABC transporter-like,IPR003593:AAA+ ATPase domain,IPR005292:Multi drug resistance-associated protein,IPR011527:ABC transporter, transmembrane domain, type 1,IPR017871:ABC transporter, conserved site,IPR027417:P-loop containing nucleoside triphosphate hydrolase,	bta02010:ABC transporters,		SM00382:AAA,	ATP-binding,Complete proteome,Membrane,Nucleotide-binding,Reference proteome,Repeat,Transmembrane,Transmembrane helix,
E1BKR6	ATP binding cassette subfamily C member 8(ABCC8)	Bos taurus	Defense mechanisms,		GO:0008076~voltage-gated potassium channel complex,	GO:0005267~potassium channel activity,GO:0005524~ATP binding,GO:0008281~sulfonylurea receptor activity,GO:0042626~ATPase activity, coupled to transmembrane movement of substances,	IPR000388:Sulphonylurea receptor,IPR000844:Sulphonylurea receptor, type 1,IPR003439:ABC transporter-like,IPR003593:AAA+ ATPase domain,IPR011527:ABC transporter, transmembrane domain, type 1,IPR017871:ABC transporter, conserved site,IPR027417:P-loop containing nucleoside triphosphate hydrolase,	bta02010:ABC transporters,bta04911:Insulin secretion,bta04930:Type II diabetes mellitus,		SM00382:AAA,	ATP-binding,Complete proteome,Membrane,Nucleotide-binding,Reference proteome,Repeat,Transmembrane,Transmembrane helix,
L8HQN0	ATP binding cassette subfamily D member 1(ABCD1)	Bos mutus		GO:0006635~fatty acid beta-oxidation,GO:0015910~peroxisomal long-chain fatty acid import,	GO:0005778~peroxisomal membrane,GO:0016021~integral component of membrane,	GO:0005324~long-chain fatty acid transporter activity,GO:0005524~ATP binding,GO:0042626~ATPase activity, coupled to transmembrane movement of substances,	IPR003439:ABC transporter-like,IPR003593:AAA+ ATPase domain,IPR005283:Peroxysomal long chain fatty acyl transporter,IPR011527:ABC transporter, transmembrane domain, type 1,IPR017871:ABC transporter, conserved site,IPR027417:P-loop containing nucleoside triphosphate hydrolase,	bom02010:ABC transporters,bom04146:Peroxisome,		SM00382:AAA,	ATP-binding,Nucleotide-binding,
F6RLQ6	ATP binding cassette subfamily D member 2(ABCD2)	Bos taurus		GO:0000038~very long-chain fatty acid metabolic process,GO:0006635~fatty acid beta-oxidation,GO:0032000~positive regulation of fatty acid beta-oxidation,GO:0042760~very long-chain fatty acid catabolic process,	GO:0005777~peroxisome,GO:0016021~integral component of membrane,	GO:0005524~ATP binding,GO:0042626~ATPase activity, coupled to transmembrane movement of substances,	IPR003439:ABC transporter-like,IPR003593:AAA+ ATPase domain,IPR011527:ABC transporter, transmembrane domain, type 1,IPR017871:ABC transporter, conserved site,IPR027417:P-loop containing nucleoside triphosphate hydrolase,	bta02010:ABC transporters,bta04146:Peroxisome,		SM00382:AAA,	ATP-binding,Coiled coil,Complete proteome,Membrane,Nucleotide-binding,Reference proteome,Transmembrane,Transmembrane helix,
A7Z038	ATP binding cassette subfamily D member 3(ABCD3)	Bos taurus		GO:0006633~fatty acid biosynthetic process,GO:0006635~fatty acid beta-oxidation,GO:0007031~peroxisome organization,GO:0015910~peroxisomal long-chain fatty acid import,GO:0042760~very long-chain fatty acid catabolic process,	GO:0005743~mitochondrial inner membrane,GO:0005778~peroxisomal membrane,GO:0005782~peroxisomal matrix,GO:0016021~integral component of membrane,	GO:0005324~long-chain fatty acid transporter activity,GO:0005524~ATP binding,GO:0042626~ATPase activity, coupled to transmembrane movement of substances,	IPR003439:ABC transporter-like,IPR003593:AAA+ ATPase domain,IPR005283:Peroxysomal long chain fatty acyl transporter,IPR011527:ABC transporter, transmembrane domain, type 1,IPR017871:ABC transporter, conserved site,IPR027417:P-loop containing nucleoside triphosphate hydrolase,	bta02010:ABC transporters,bta04146:Peroxisome,		SM00382:AAA,	ATP-binding,Complete proteome,Membrane,Nucleotide-binding,Reference proteome,Transmembrane,Transmembrane helix,
A4IFE6	ATP binding cassette subfamily E member 1(ABCE1)	Bos taurus	General function prediction only,	GO:0000054~ribosomal subunit export from nucleus,GO:0006413~translational initiation,GO:0006415~translational termination,	GO:0005739~mitochondrion,GO:0016020~membrane,	GO:0005506~iron ion binding,GO:0005524~ATP binding,GO:0016887~ATPase activity,GO:0043024~ribosomal small subunit binding,	IPR003439:ABC transporter-like,IPR003593:AAA+ ATPase domain,IPR007209:RNase L inhibitor RLI, possible metal-binding domain,IPR013283:ABC transporter, ABCE,IPR017871:ABC transporter, conserved site,IPR017896:4Fe-4S ferredoxin-type, iron-sulpur binding domain,IPR017900:4Fe-4S ferredoxin, iron-sulphur binding, conserved site,IPR027417:P-loop containing nucleoside triphosphate hydrolase,			SM00382:AAA,	ATP-binding,Complete proteome,Nucleotide-binding,Reference proteome,
E1BGH0	ATP binding cassette subfamily F member 1(ABCF1)	Bos taurus			GO:0005737~cytoplasm,GO:0016020~membrane,	GO:0005524~ATP binding,GO:0016887~ATPase activity,GO:0044822~poly(A) RNA binding,	IPR003439:ABC transporter-like,IPR003593:AAA+ ATPase domain,IPR017871:ABC transporter, conserved site,IPR027417:P-loop containing nucleoside triphosphate hydrolase,			SM00382:AAA,	ATP-binding,Coiled coil,Complete proteome,Nucleotide-binding,Proteomics identification,Reference proteome,
A4FUE2	ATP binding cassette subfamily F member 3(ABCF3)	Bos taurus	General function prediction only,		GO:0016020~membrane,	GO:0005524~ATP binding,GO:0016887~ATPase activity,	IPR003439:ABC transporter-like,IPR003593:AAA+ ATPase domain,IPR017871:ABC transporter, conserved site,IPR027417:P-loop containing nucleoside triphosphate hydrolase,			SM00382:AAA,	ATP-binding,Complete proteome,Nucleotide-binding,Reference proteome,
H9ZHQ8, Q4GZT4	ATP binding cassette subfamily G member 2 (Junior blood group)(ABCG2)	Bos taurus		GO:0006855~drug transmembrane transport,GO:0046415~urate metabolic process,	GO:0005634~nucleus,GO:0005886~plasma membrane,GO:0016021~integral component of membrane,GO:0031966~mitochondrial membrane,	GO:0005524~ATP binding,GO:0015238~drug transmembrane transporter activity,GO:0042626~ATPase activity, coupled to transmembrane movement of substances,	IPR003439:ABC transporter-like,IPR003593:AAA+ ATPase domain,IPR013525:ABC-2 type transporter,IPR027417:P-loop containing nucleoside triphosphate hydrolase,	bta02010:ABC transporters,bta04976:Bile secretion,		SM00382:AAA,	ATP-binding,Cell membrane,Complete proteome,Disulfide bond,Glycoprotein,Membrane,Mitochondrion,Nucleotide-binding,Polymorphism,Reference proteome,Signal,Transmembrane,Transmembrane helix,Transport,	chain:ATP-binding cassette sub-family G member 2,disulfide bond,domain:ABC transmembrane type-2,domain:ABC transporter,glycosylation site:N-linked (GlcNAc...),nucleotide phosphate-binding region:ATP,sequence variant,topological domain:Cytoplasmic,topological domain:Extracellular,transmembrane region,
A7Z044	ATP binding cassette subfamily G member 4(ABCG4)	Bos taurus		GO:0033344~cholesterol efflux,	GO:0005886~plasma membrane,GO:0016021~integral component of membrane,	GO:0005524~ATP binding,GO:0017127~cholesterol transporter activity,GO:0034041~sterol-transporting ATPase activity,	IPR003439:ABC transporter-like,IPR003593:AAA+ ATPase domain,IPR013525:ABC-2 type transporter,IPR017871:ABC transporter, conserved site,IPR027417:P-loop containing nucleoside triphosphate hydrolase,	bta02010:ABC transporters,		SM00382:AAA,	ATP-binding,Complete proteome,Membrane,Nucleotide-binding,Reference proteome,Transmembrane,Transmembrane helix,
L8HNY5	ATP binding cassette subfamily G member 5(ABCG5)	Bos mutus			GO:0016021~integral component of membrane,	GO:0005524~ATP binding,GO:0016887~ATPase activity,	IPR003439:ABC transporter-like,IPR003593:AAA+ ATPase domain,IPR013525:ABC-2 type transporter,IPR017871:ABC transporter, conserved site,IPR027417:P-loop containing nucleoside triphosphate hydrolase,	bom02010:ABC transporters,bom04975:Fat digestion and absorption,bom04976:Bile secretion,		SM00382:AAA,	ATP-binding,Membrane,Nucleotide-binding,Transmembrane,Transmembrane helix,
F1N3K2	ATP binding cassette subfamily G member 8(ABCG8)	Bos taurus		GO:0007588~excretion,GO:0010949~negative regulation of intestinal phytosterol absorption,GO:0015914~phospholipid transport,GO:0033344~cholesterol efflux,GO:0042632~cholesterol homeostasis,GO:0045796~negative regulation of intestinal cholesterol absorption,	GO:0016021~integral component of membrane,GO:0016324~apical plasma membrane,GO:0043190~ATP-binding cassette (ABC) transporter complex,GO:0043235~receptor complex,	GO:0005524~ATP binding,GO:0016887~ATPase activity,GO:0017127~cholesterol transporter activity,GO:0042626~ATPase activity, coupled to transmembrane movement of substances,	IPR003439:ABC transporter-like,IPR013525:ABC-2 type transporter,IPR017871:ABC transporter, conserved site,IPR027417:P-loop containing nucleoside triphosphate hydrolase,	bta02010:ABC transporters,bta04975:Fat digestion and absorption,bta04976:Bile secretion,			ATP-binding,Complete proteome,Membrane,Nucleotide-binding,Reference proteome,Transmembrane,Transmembrane helix,
Q32PF2	ATP citrate lyase(ACLY)	Bos taurus	Energy production and conversion,	GO:0006085~acetyl-CoA biosynthetic process,GO:0006101~citrate metabolic process,GO:0006107~oxaloacetate metabolic process,GO:0006633~fatty acid biosynthetic process,GO:0008610~lipid biosynthetic process,	GO:0005654~nucleoplasm,GO:0005829~cytosol,GO:0005886~plasma membrane,GO:0009346~citrate lyase complex,GO:0070062~extracellular exosome,	GO:0003878~ATP citrate synthase activity,GO:0005524~ATP binding,GO:0046872~metal ion binding,GO:0048037~cofactor binding,	IPR002020:Citrate synthase-like,IPR003781:CoA-binding,IPR005810:Succinyl-CoA ligase, alpha subunit,IPR005811:ATP-citrate lyase/succinyl-CoA ligase,IPR013816:ATP-grasp fold, subdomain 2,IPR014608:ATP-citrate synthase,IPR016040:NAD(P)-binding domain,IPR016102:Succinyl-CoA synthetase-like,IPR016143:Citrate synthase-like, small alpha subdomain,IPR017440:ATP-citrate lyase/succinyl-CoA ligase, active s…	bta00020:Citrate cycle (TCA cycle),bta01100:Metabolic pathways,bta01130:Biosynthesis of antibiotics,	PIRSF036511:ATP citrate synthase, fused large and small subunits,	SM00881:SM00881,	Acetylation,ATP-binding,Complete proteome,Cytoplasm,Lipid biosynthesis,Lipid metabolism,Magnesium,Metal-binding,Nucleotide-binding,Phosphoprotein,Reference proteome,Transferase,Ubl conjugation,	active site:Tele-phosphohistidine intermediate,chain:ATP-citrate synthase,metal ion-binding site:Magnesium,modified residue,nucleotide phosphate-binding region:ATP,region of interest:CoA-binding,
F1MG81	ATP synthase mitochondrial F1 complex assembly factor 1(ATPAF1)	Bos taurus		GO:0033615~mitochondrial proton-transporting ATP synthase complex assembly,	GO:0005739~mitochondrion,		IPR010591:ATP11,				Complete proteome,Reference proteome,
Q1LZ96	ATP synthase mitochondrial F1 complex assembly factor 2(ATPAF2)	Bos taurus		GO:0043461~proton-transporting ATP synthase complex assembly,	GO:0005739~mitochondrion,GO:0016607~nuclear speck,		IPR011419:ATP12, ATPase F1F0-assembly protein,IPR023335:Orthogonal Bundle domain in ATP12,				Chaperone,Complete proteome,Mitochondrion,Reference proteome,Transit peptide,	chain:ATP synthase mitochondrial F1 complex assembly factor 2,transit peptide:Mitochondrion,
P19483	ATP synthase, H+ transporting, mitochondrial F1 complex, alpha subunit 1, cardiac muscle(ATP5A1)	Bos taurus		GO:0001937~negative regulation of endothelial cell proliferation,GO:0006629~lipid metabolic process,GO:0015986~ATP synthesis coupled proton transport,GO:0015991~ATP hydrolysis coupled proton transport,	GO:0005753~mitochondrial proton-transporting ATP synthase complex,GO:0005886~plasma membrane,GO:0008180~COP9 signalosome,GO:0043209~myelin sheath,GO:0045261~proton-transporting ATP synthase complex, catalytic core F(1),GO:0070062~extracellular exosome,	GO:0005515~protein binding,GO:0005524~ATP binding,GO:0044822~poly(A) RNA binding,GO:0046933~proton-transporting ATP synthase activity, rotational mechanism,GO:0046961~proton-transporting ATPase activity, rotational mechanism,	IPR000194:ATPase, F1/V1/A1 complex, alpha/beta subunit, nucleotide-binding domain,IPR000793:ATPase, F1/V1/A1 complex, alpha/beta subunit, C-terminal,IPR004100:ATPase, alpha/beta subunit, N-terminal,IPR005294:ATPase, F1 complex, alpha subunit,IPR020003:ATPase, alpha/beta subunit, nucleotide-binding domain, active site,IPR023366:ATPase, F1/A1 complex, alpha subunit, N-terminal,IPR027417:P-loop cont…	bta00190:Oxidative phosphorylation,bta01100:Metabolic pathways,bta05010:Alzheimer's disease,bta05012:Parkinson's disease,bta05016:Huntington's disease,			3D-structure,Acetylation,ATP synthesis,ATP-binding,Cell membrane,CF(1),Complete proteome,Direct protein sequencing,Glycoprotein,Hydrogen ion transport,Ion transport,Membrane,Methylation,Mitochondrion,Mitochondrion inner membrane,Nucleotide-binding,Phosphoprotein,Proteomics identification,Pyrrolidone carboxylic acid,Reference proteome,Transit peptide,Transport,	chain:ATP synthase subunit alpha, mitochondrial,helix,modified residue,nucleotide phosphate-binding region:ATP,sequence conflict,site:Required for activity,strand,transit peptide:Mitochondrion,turn,
P00829	ATP synthase, H+ transporting, mitochondrial F1 complex, beta polypeptide(ATP5B)	Bos taurus		GO:0001525~angiogenesis,GO:0001649~osteoblast differentiation,GO:0006629~lipid metabolic process,GO:0006933~negative regulation of cell adhesion involved in substrate-bound cell migration,GO:0015986~ATP synthesis coupled proton transport,GO:0015991~ATP hydrolysis coupled proton transport,GO:0051453~regulation of intracellular pH,	GO:0005634~nucleus,GO:0005753~mitochondrial proton-transporting ATP synthase complex,GO:0005886~plasma membrane,GO:0009986~cell surface,GO:0031012~extracellular matrix,GO:0042645~mitochondrial nucleoid,GO:0043209~myelin sheath,GO:0045261~proton-transporting ATP synthase complex, catalytic core F(1),GO:0070062~extracellular exosome,	GO:0005515~protein binding,GO:0005524~ATP binding,GO:0042288~MHC class I protein binding,GO:0046933~proton-transporting ATP synthase activity, rotational mechanism,GO:0046961~proton-transporting ATPase activity, rotational mechanism,	IPR000194:ATPase, F1/V1/A1 complex, alpha/beta subunit, nucleotide-binding domain,IPR000793:ATPase, F1/V1/A1 complex, alpha/beta subunit, C-terminal,IPR003593:AAA+ ATPase domain,IPR004100:ATPase, alpha/beta subunit, N-terminal,IPR005722:ATPase, F1 complex, beta subunit,IPR020003:ATPase, alpha/beta subunit, nucleotide-binding domain, active site,IPR024034:ATPase, F1 complex beta subunit/V1 complex…	bta00190:Oxidative phosphorylation,bta01100:Metabolic pathways,bta05010:Alzheimer's disease,bta05012:Parkinson's disease,bta05016:Huntington's disease,		SM00382:AAA,	3D-structure,Acetylation,ATP synthesis,ATP-binding,CF(1),Complete proteome,Direct protein sequencing,Glycoprotein,Hydrogen ion transport,Hydrolase,Ion transport,Membrane,Mitochondrion,Mitochondrion inner membrane,Nucleotide-binding,Phosphoprotein,Reference proteome,Transit peptide,Transport,	chain:ATP synthase subunit beta, mitochondrial,helix,modified residue,nucleotide phosphate-binding region:ATP,sequence conflict,sequence variant,strand,transit peptide:Mitochondrion,turn,
P05631	ATP synthase, H+ transporting, mitochondrial F1 complex, gamma polypeptide 1(ATP5C1)	Bos taurus		GO:0015986~ATP synthesis coupled proton transport,	GO:0005753~mitochondrial proton-transporting ATP synthase complex,GO:0043209~myelin sheath,GO:0045261~proton-transporting ATP synthase complex, catalytic core F(1),GO:0070062~extracellular exosome,	GO:0005515~protein binding,GO:0044822~poly(A) RNA binding,GO:0046933~proton-transporting ATP synthase activity, rotational mechanism,GO:0046961~proton-transporting ATPase activity, rotational mechanism,	IPR000131:ATPase, F1 complex, gamma subunit,IPR023632:ATPase, F1 complex, gamma subunit conserved site,	bta00190:Oxidative phosphorylation,bta01100:Metabolic pathways,bta05010:Alzheimer's disease,bta05012:Parkinson's disease,bta05016:Huntington's disease,			3D-structure,Acetylation,Alternative splicing,ATP synthesis,CF(1),Complete proteome,Direct protein sequencing,Hydrogen ion transport,Ion transport,Membrane,Mitochondrion,Mitochondrion inner membrane,Phosphoprotein,Reference proteome,Transit peptide,Transport,	chain:ATP synthase subunit gamma, mitochondrial,helix,modified residue,sequence conflict,splice variant,strand,transit peptide:Mitochondrion,turn,
P02721	ATP synthase, H+ transporting, mitochondrial Fo complex subunit F6(ATP5J)	Bos taurus		GO:0015986~ATP synthesis coupled proton transport,GO:0021762~substantia nigra development,	GO:0000276~mitochondrial proton-transporting ATP synthase complex, coupling factor F(o),GO:0005753~mitochondrial proton-transporting ATP synthase complex,	GO:0015078~hydrogen ion transmembrane transporter activity,GO:0016887~ATPase activity,	IPR008387:ATPase, F0 complex, subunit F6, mitochondrial,IPR016349:ATPase, F0 complex, subunit F6, mitochondrial subgroup,	bta00190:Oxidative phosphorylation,bta01100:Metabolic pathways,bta05010:Alzheimer's disease,bta05012:Parkinson's disease,bta05016:Huntington's disease,	PIRSF002455:ATP synthase coupling factor 6,		3D-structure,Acetylation,CF(0),Complete proteome,Direct protein sequencing,Hydrogen ion transport,Ion transport,Membrane,Mitochondrion,Mitochondrion inner membrane,Phosphoprotein,Reference proteome,Transit peptide,Transport,	chain:ATP synthase-coupling factor 6, mitochondrial,helix,modified residue,sequence conflict,strand,transit peptide:Mitochondrion,
E1BK38	ATP-binding cassette, sub-family A (ABC1), member 13(ABCA13)	Bos taurus		GO:0033344~cholesterol efflux,GO:0033700~phospholipid efflux,	GO:0016021~integral component of membrane,GO:0043231~intracellular membrane-bounded organelle,	GO:0005215~transporter activity,GO:0005524~ATP binding,GO:0016887~ATPase activity,GO:0042626~ATPase activity, coupled to transmembrane movement of substances,	IPR003439:ABC transporter-like,IPR003593:AAA+ ATPase domain,IPR026082:ABC transporter A, ABCA,IPR027417:P-loop containing nucleoside triphosphate hydrolase,			SM00382:AAA,	Complete proteome,Membrane,Reference proteome,Transmembrane,Transmembrane helix,
E1BLT5	ATP-binding cassette, sub-family B (MDR/TAP), member 4(ABCB4)	Bos taurus		GO:0002481~antigen processing and presentation of exogenous protein antigen via MHC class Ib, TAP-dependent,GO:0002485~antigen processing and presentation of endogenous peptide antigen via MHC class I via ER pathway, TAP-dependent,GO:0002489~antigen processing and presentation of endogenous peptide antigen via MHC class Ib via ER pathway, TAP-dependent,GO:0002591~positive regulation of antigen pr…	GO:0005737~cytoplasm,GO:0016021~integral component of membrane,GO:0016324~apical plasma membrane,GO:0046581~intercellular canaliculus,GO:0070062~extracellular exosome,	GO:0005524~ATP binding,GO:0042626~ATPase activity, coupled to transmembrane movement of substances,GO:0090554~phosphatidylcholine-translocating ATPase activity,	IPR003439:ABC transporter-like,IPR003593:AAA+ ATPase domain,IPR011527:ABC transporter, transmembrane domain, type 1,IPR017871:ABC transporter, conserved site,IPR027417:P-loop containing nucleoside triphosphate hydrolase,	bta02010:ABC transporters,bta04976:Bile secretion,		SM00382:AAA,	ATP-binding,Complete proteome,Membrane,Nucleotide-binding,Reference proteome,Repeat,Transmembrane,Transmembrane helix,
F1MKS6	ATP/GTP binding protein 1(AGTPBP1)	Bos taurus		GO:0001754~eye photoreceptor cell differentiation,GO:0007005~mitochondrion organization,GO:0007628~adult walking behavior,GO:0021702~cerebellar Purkinje cell differentiation,GO:0021772~olfactory bulb development,GO:0035609~C-terminal protein deglutamylation,GO:0035610~protein side chain deglutamylation,GO:0042133~neurotransmitter metabolic process,GO:0050905~neuromuscular process,GO:0060041~retin…	GO:0005634~nucleus,GO:0005739~mitochondrion,GO:0005829~cytosol,	GO:0004181~metallocarboxypeptidase activity,GO:0008270~zinc ion binding,	IPR000834:Peptidase M14, carboxypeptidase A,IPR011989:Armadillo-like helical,IPR016024:Armadillo-type fold,				Complete proteome,Reference proteome,
E1B9D8	ATP/GTP binding protein like 3(AGBL3)	Bos taurus		GO:0006508~proteolysis,GO:0035610~protein side chain deglutamylation,	GO:0005829~cytosol,	GO:0004181~metallocarboxypeptidase activity,GO:0008270~zinc ion binding,	IPR000834:Peptidase M14, carboxypeptidase A,				Carboxypeptidase,Complete proteome,Cytoplasm,Hydrolase,Metal-binding,Metalloprotease,Protease,Reference proteome,Zinc,
F1MYA8	ATPase 13A1(ATP13A1)	Bos taurus		GO:0006812~cation transport,GO:0006874~cellular calcium ion homeostasis,	GO:0005887~integral component of plasma membrane,GO:0016021~integral component of membrane,GO:0043231~intracellular membrane-bounded organelle,	GO:0005524~ATP binding,GO:0016887~ATPase activity,GO:0019829~cation-transporting ATPase activity,GO:0046872~metal ion binding,	IPR001757:Cation-transporting P-type ATPase,IPR006544:Cation-transporting P-type ATPase, subfamily V,IPR008250:P-type ATPase, A domain,IPR018303:P-type ATPase, phosphorylation site,IPR023214:HAD-like domain,IPR023299:P-type ATPase, cytoplasmic domain N,				ATP-binding,Complete proteome,Hydrolase,Magnesium,Membrane,Nucleotide-binding,Reference proteome,Transmembrane,Transmembrane helix,
F1MF00	ATPase 13A2(ATP13A2)	Bos taurus		GO:0006874~cellular calcium ion homeostasis,GO:0006879~cellular iron ion homeostasis,GO:0006882~cellular zinc ion homeostasis,GO:0010821~regulation of mitochondrion organization,GO:0016241~regulation of macroautophagy,GO:0016243~regulation of autophagosome size,GO:0034599~cellular response to oxidative stress,GO:0050714~positive regulation of protein secretion,GO:0052548~regulation of endopeptida…	GO:0005771~multivesicular body,GO:0005776~autophagosome,GO:0005887~integral component of plasma membrane,GO:0012506~vesicle membrane,GO:0030133~transport vesicle,GO:0043005~neuron projection,GO:0043025~neuronal cell body,GO:0043231~intracellular membrane-bounded organelle,GO:1905103~integral component of lysosomal membrane,	GO:0005524~ATP binding,GO:0019829~cation-transporting ATPase activity,GO:0046872~metal ion binding,GO:0070300~phosphatidic acid binding,GO:0080025~phosphatidylinositol-3,5-bisphosphate binding,	IPR001757:Cation-transporting P-type ATPase,IPR006544:Cation-transporting P-type ATPase, subfamily V,IPR008250:P-type ATPase, A domain,IPR018303:P-type ATPase, phosphorylation site,IPR023214:HAD-like domain,IPR023299:P-type ATPase, cytoplasmic domain N,				ATP-binding,Complete proteome,Hydrolase,Magnesium,Membrane,Nucleotide-binding,Reference proteome,Transmembrane,Transmembrane helix,
E1BG26	ATPase 13A3(ATP13A3)	Bos taurus		GO:0006874~cellular calcium ion homeostasis,	GO:0005887~integral component of plasma membrane,GO:0043231~intracellular membrane-bounded organelle,	GO:0005524~ATP binding,GO:0019829~cation-transporting ATPase activity,GO:0046872~metal ion binding,	IPR001757:Cation-transporting P-type ATPase,IPR004014:Cation-transporting P-type ATPase, N-terminal,IPR006544:Cation-transporting P-type ATPase, subfamily V,IPR008250:P-type ATPase, A domain,IPR018303:P-type ATPase, phosphorylation site,IPR023214:HAD-like domain,IPR023299:P-type ATPase, cytoplasmic domain N,				ATP-binding,Complete proteome,Hydrolase,Magnesium,Membrane,Nucleotide-binding,Reference proteome,Transmembrane,Transmembrane helix,
F1N272	ATPase 13A4(ATP13A4)	Bos taurus		GO:0006874~cellular calcium ion homeostasis,	GO:0005887~integral component of plasma membrane,GO:0043231~intracellular membrane-bounded organelle,	GO:0005524~ATP binding,GO:0019829~cation-transporting ATPase activity,GO:0046872~metal ion binding,	IPR001757:Cation-transporting P-type ATPase,IPR004014:Cation-transporting P-type ATPase, N-terminal,IPR006544:Cation-transporting P-type ATPase, subfamily V,IPR008250:P-type ATPase, A domain,IPR018303:P-type ATPase, phosphorylation site,IPR023214:HAD-like domain,IPR023299:P-type ATPase, cytoplasmic domain N,			SM00831:SM00831,	ATP-binding,Complete proteome,Hydrolase,Magnesium,Membrane,Nucleotide-binding,Reference proteome,Transmembrane,Transmembrane helix,
O97681	ATPase H+ transporting V0 subunit a2(ATP6V0A2)	Bos taurus		GO:0007035~vacuolar acidification,GO:0015986~ATP synthesis coupled proton transport,GO:0015991~ATP hydrolysis coupled proton transport,GO:0070072~vacuolar proton-transporting V-type ATPase complex assembly,	GO:0000220~vacuolar proton-transporting V-type ATPase, V0 domain,GO:0001669~acrosomal vesicle,GO:0005765~lysosomal membrane,GO:0005886~plasma membrane,GO:0005925~focal adhesion,GO:0010008~endosome membrane,GO:0016021~integral component of membrane,GO:0016471~vacuolar proton-transporting V-type ATPase complex,	GO:0046961~proton-transporting ATPase activity, rotational mechanism,GO:0051117~ATPase binding,	IPR002490:ATPase, V0 complex, subunit 116kDa,IPR026028:ATPase, V0 complex, subunit 116kDa, eukaryotic,	bta00190:Oxidative phosphorylation,bta01100:Metabolic pathways,bta04142:Lysosome,bta04145:Phagosome,bta04721:Synaptic vesicle cycle,bta04966:Collecting duct acid secretion,bta05152:Tuberculosis,bta05323:Rheumatoid arthritis,	PIRSF001293:V-type proton ATPase 116 kda subunit a isoform 1,		Cell membrane,Complete proteome,Endosome,Hydrogen ion transport,Ion transport,Membrane,Phosphoprotein,Reference proteome,Transmembrane,Transmembrane helix,Transport,	chain:V-type proton ATPase 116 kDa subunit a isoform 2,modified residue,topological domain:Cytoplasmic,topological domain:Lumenal,transmembrane region,
E1BGJ7	ATPase H+ transporting V0 subunit a4(ATP6V0A4)	Bos taurus		GO:0001503~ossification,GO:0007035~vacuolar acidification,GO:0007588~excretion,GO:0007605~sensory perception of sound,GO:0015986~ATP synthesis coupled proton transport,GO:0015991~ATP hydrolysis coupled proton transport,GO:0070072~vacuolar proton-transporting V-type ATPase complex assembly,	GO:0000220~vacuolar proton-transporting V-type ATPase, V0 domain,GO:0005765~lysosomal membrane,GO:0005768~endosome,GO:0016021~integral component of membrane,GO:0016324~apical plasma membrane,GO:0016471~vacuolar proton-transporting V-type ATPase complex,GO:0031526~brush border membrane,GO:0070062~extracellular exosome,	GO:0046961~proton-transporting ATPase activity, rotational mechanism,GO:0051117~ATPase binding,	IPR002490:ATPase, V0 complex, subunit 116kDa,IPR026028:ATPase, V0 complex, subunit 116kDa, eukaryotic,	bta00190:Oxidative phosphorylation,bta01100:Metabolic pathways,bta04142:Lysosome,bta04145:Phagosome,bta04721:Synaptic vesicle cycle,bta04966:Collecting duct acid secretion,bta05152:Tuberculosis,bta05323:Rheumatoid arthritis,	PIRSF001293:V-type proton ATPase 116 kda subunit a isoform 1,		Coiled coil,Complete proteome,Hydrogen ion transport,Ion transport,Membrane,Reference proteome,Transmembrane,Transmembrane helix,Transport,
P61420	ATPase H+ transporting V0 subunit d1(ATP6V0D1)	Bos taurus		GO:0007034~vacuolar transport,GO:0007035~vacuolar acidification,GO:0015991~ATP hydrolysis coupled proton transport,GO:0042384~cilium assembly,GO:0060271~cilium morphogenesis,	GO:0005765~lysosomal membrane,GO:0005769~early endosome,GO:0005813~centrosome,GO:0016471~vacuolar proton-transporting V-type ATPase complex,GO:0033179~proton-transporting V-type ATPase, V0 domain,GO:0033181~plasma membrane proton-transporting V-type ATPase complex,GO:0070062~extracellular exosome,	GO:0008553~hydrogen-exporting ATPase activity, phosphorylative mechanism,GO:0046961~proton-transporting ATPase activity, rotational mechanism,	IPR002843:ATPase, V0 complex, c/d subunit,IPR016727:ATPase, V0 complex, subunit d,	bta00190:Oxidative phosphorylation,bta01100:Metabolic pathways,bta04142:Lysosome,bta04145:Phagosome,bta04721:Synaptic vesicle cycle,bta04966:Collecting duct acid secretion,bta05152:Tuberculosis,bta05203:Viral carcinogenesis,bta05323:Rheumatoid arthritis,	PIRSF018497:V-type ATPase, subunit d,		Cilium biogenesis/degradation,Complete proteome,Direct protein sequencing,Hydrogen ion transport,Ion transport,Membrane,Phosphoprotein,Reference proteome,Transport,	chain:V-type proton ATPase subunit d 1,modified residue,
P31404	ATPase H+ transporting V1 subunit A(ATP6V1A)	Bos taurus		GO:0015991~ATP hydrolysis coupled proton transport,GO:0046034~ATP metabolic process,	GO:0005739~mitochondrion,GO:0005765~lysosomal membrane,GO:0005829~cytosol,GO:0005886~plasma membrane,GO:0005902~microvillus,GO:0016324~apical plasma membrane,GO:0033180~proton-transporting V-type ATPase, V1 domain,GO:0043209~myelin sheath,GO:0070062~extracellular exosome,	GO:0005524~ATP binding,GO:0046961~proton-transporting ATPase activity, rotational mechanism,	IPR000194:ATPase, F1/V1/A1 complex, alpha/beta subunit, nucleotide-binding domain,IPR000793:ATPase, F1/V1/A1 complex, alpha/beta subunit, C-terminal,IPR004100:ATPase, alpha/beta subunit, N-terminal,IPR005725:ATPase, V1 complex, subunit A,IPR020003:ATPase, alpha/beta subunit, nucleotide-binding domain, active site,IPR022878:V-type ATP synthase catalytic subunit A/alpha,IPR024034:ATPase, F1 complex…	bta00190:Oxidative phosphorylation,bta01100:Metabolic pathways,bta04145:Phagosome,bta04721:Synaptic vesicle cycle,bta04966:Collecting duct acid secretion,bta05323:Rheumatoid arthritis,			ATP-binding,Complete proteome,Hydrogen ion transport,Hydrolase,Ion transport,Nucleotide-binding,Phosphoprotein,Reference proteome,Transport,	chain:V-type proton ATPase catalytic subunit A,modified residue,nucleotide phosphate-binding region:ATP,sequence conflict,
A6QP02	ATPase H+ transporting V1 subunit B1(ATP6V1B1)	Bos taurus		GO:0001503~ossification,GO:0006885~regulation of pH,GO:0007588~excretion,GO:0007605~sensory perception of sound,GO:0015991~ATP hydrolysis coupled proton transport,GO:0015992~proton transport,GO:0042472~inner ear morphogenesis,GO:0045851~pH reduction,GO:0046034~ATP metabolic process,GO:0055074~calcium ion homeostasis,	GO:0005737~cytoplasm,GO:0005829~cytosol,GO:0005902~microvillus,GO:0016323~basolateral plasma membrane,GO:0016324~apical plasma membrane,GO:0016328~lateral plasma membrane,GO:0016471~vacuolar proton-transporting V-type ATPase complex,GO:0033180~proton-transporting V-type ATPase, V1 domain,GO:0070062~extracellular exosome,	GO:0005524~ATP binding,GO:0015078~hydrogen ion transmembrane transporter activity,GO:0016820~hydrolase activity, acting on acid anhydrides, catalyzing transmembrane movement of substances,	IPR000194:ATPase, F1/V1/A1 complex, alpha/beta subunit, nucleotide-binding domain,IPR004100:ATPase, alpha/beta subunit, N-terminal,IPR005723:ATPase, V1 complex, subunit B,IPR020003:ATPase, alpha/beta subunit, nucleotide-binding domain, active site,IPR022879:V-type ATP synthase regulatory subunit B/beta,IPR027417:P-loop containing nucleoside triphosphate hydrolase,	bta00190:Oxidative phosphorylation,bta01100:Metabolic pathways,bta04145:Phagosome,bta04721:Synaptic vesicle cycle,bta04966:Collecting duct acid secretion,bta05323:Rheumatoid arthritis,			Cell membrane,Complete proteome,Direct protein sequencing,Hydrogen ion transport,Hydrolase,Ion transport,Membrane,Reference proteome,Transport,	chain:V-type proton ATPase subunit B, kidney isoform,short sequence motif:PDZ-binding,
P31408	ATPase H+ transporting V1 subunit B2(ATP6V1B2)	Bos taurus		GO:0015991~ATP hydrolysis coupled proton transport,GO:0046034~ATP metabolic process,	GO:0001726~ruffle,GO:0005765~lysosomal membrane,GO:0005829~cytosol,GO:0005886~plasma membrane,GO:0005902~microvillus,GO:0012505~endomembrane system,GO:0033180~proton-transporting V-type ATPase, V1 domain,GO:0042470~melanosome,GO:0043209~myelin sheath,GO:0070062~extracellular exosome,	GO:0005524~ATP binding,GO:0016820~hydrolase activity, acting on acid anhydrides, catalyzing transmembrane movement of substances,	IPR000194:ATPase, F1/V1/A1 complex, alpha/beta subunit, nucleotide-binding domain,IPR004100:ATPase, alpha/beta subunit, N-terminal,IPR005723:ATPase, V1 complex, subunit B,IPR020003:ATPase, alpha/beta subunit, nucleotide-binding domain, active site,IPR022879:V-type ATP synthase regulatory subunit B/beta,IPR027417:P-loop containing nucleoside triphosphate hydrolase,	bta00190:Oxidative phosphorylation,bta01100:Metabolic pathways,bta04145:Phagosome,bta04721:Synaptic vesicle cycle,bta04966:Collecting duct acid secretion,bta05323:Rheumatoid arthritis,			Complete proteome,Direct protein sequencing,Hydrogen ion transport,Hydrolase,Ion transport,Membrane,Reference proteome,Transport,	chain:V-type proton ATPase subunit B, brain isoform,modified residue,sequence conflict,
Q32LB7	ATPase H+ transporting V1 subunit E2(ATP6V1E2)	Bos taurus		GO:0015991~ATP hydrolysis coupled proton transport,	GO:0001669~acrosomal vesicle,GO:0033178~proton-transporting two-sector ATPase complex, catalytic domain,	GO:0008553~hydrogen-exporting ATPase activity, phosphorylative mechanism,GO:0046961~proton-transporting ATPase activity, rotational mechanism,	IPR002842:ATPase, V1/A1 complex, subunit E,	bta00190:Oxidative phosphorylation,bta01100:Metabolic pathways,bta04145:Phagosome,bta04721:Synaptic vesicle cycle,bta04966:Collecting duct acid secretion,bta05323:Rheumatoid arthritis,			Complete proteome,Hydrogen ion transport,Ion transport,Reference proteome,Transport,	chain:V-type proton ATPase subunit E 2,modified residue,
P40682	ATPase H+ transporting accessory protein 1(ATP6AP1)	Bos taurus		GO:0015991~ATP hydrolysis coupled proton transport,GO:0045669~positive regulation of osteoblast differentiation,GO:0045780~positive regulation of bone resorption,GO:0045851~pH reduction,GO:0045921~positive regulation of exocytosis,GO:0051656~establishment of organelle localization,GO:0070374~positive regulation of ERK1 and ERK2 cascade,GO:2001206~positive regulation of osteoclast development,	GO:0005774~vacuolar membrane,GO:0016021~integral component of membrane,GO:0033180~proton-transporting V-type ATPase, V1 domain,GO:0070062~extracellular exosome,	GO:0005524~ATP binding,GO:0017137~Rab GTPase binding,GO:0046933~proton-transporting ATP synthase activity, rotational mechanism,GO:0046961~proton-transporting ATPase activity, rotational mechanism,	IPR008388:ATPase, V1 complex, subunit S1,IPR024722:BIG/ATPase V1 complex, subunit S1,	bta00190:Oxidative phosphorylation,bta01100:Metabolic pathways,bta04142:Lysosome,bta04145:Phagosome,bta05152:Tuberculosis,bta05161:Hepatitis B,bta05323:Rheumatoid arthritis,			ATP-binding,Complete proteome,Direct protein sequencing,Glycoprotein,Hydrogen ion transport,Ion transport,Membrane,Nucleotide-binding,Reference proteome,Signal,Transmembrane,Transmembrane helix,Transport,Vacuole,	chain:V-type proton ATPase subunit S1,glycosylation site:N-linked (GlcNAc...),signal peptide,transmembrane region,
P81134	ATPase H+ transporting accessory protein 2(ATP6AP2)	Bos taurus			GO:0016021~integral component of membrane,	GO:0004872~receptor activity,	IPR012493:Renin receptor-like,	bta04614:Renin-angiotensin system,			Complete proteome,Direct protein sequencing,Membrane,Phosphoprotein,Receptor,Reference proteome,Signal,Transmembrane,Transmembrane helix,	chain:Renin receptor,signal peptide,topological domain:Cytoplasmic,topological domain:Extracellular,transmembrane region,
Q3ZCH8	ATPase Na+/K+ transporting subunit beta 1(ATP1B1)	Bos taurus		GO:0002230~positive regulation of defense response to virus by host,GO:0006813~potassium ion transport,GO:0006814~sodium ion transport,GO:0006874~cellular calcium ion homeostasis,GO:0006883~cellular sodium ion homeostasis,GO:0010107~potassium ion import,GO:0010468~regulation of gene expression,GO:0010882~regulation of cardiac muscle contraction by calcium ion signaling,GO:0030007~cellular potassi…	GO:0005622~intracellular,GO:0005890~sodium:potassium-exchanging ATPase complex,GO:0014704~intercalated disc,GO:0016323~basolateral plasma membrane,GO:0016324~apical plasma membrane,GO:0042383~sarcolemma,GO:0043209~myelin sheath,GO:0070062~extracellular exosome,	GO:0001671~ATPase activator activity,GO:0005391~sodium:potassium-exchanging ATPase activity,GO:0005524~ATP binding,GO:0008144~drug binding,GO:0030955~potassium ion binding,GO:0031402~sodium ion binding,	IPR000402:Sodium/potassium-transporting ATPase subunit beta,IPR015565:Sodium/potassium-transporting ATPase subunit beta, chordates,	bta04022:cGMP-PKG signaling pathway,bta04024:cAMP signaling pathway,bta04260:Cardiac muscle contraction,bta04261:Adrenergic signaling in cardiomyocytes,bta04911:Insulin secretion,bta04918:Thyroid hormone synthesis,bta04919:Thyroid hormone signaling pathway,bta04960:Aldosterone-regulated sodium reabsorption,bta04961:Endocrine and other factor-regulated calcium reabsorption,bta04964:Proximal tubule…			3D-structure,Complete proteome,Ion transport,Membrane,Reference proteome,Transmembrane,Transmembrane helix,Transport,
G3X6T7	ATPase copper transporting alpha(ATP7A)	Bos taurus		GO:0006878~cellular copper ion homeostasis,GO:0051353~positive regulation of oxidoreductase activity,GO:0060003~copper ion export,	GO:0005770~late endosome,GO:0005802~trans-Golgi network,GO:0005887~integral component of plasma membrane,GO:0016323~basolateral plasma membrane,GO:0030140~trans-Golgi network transport vesicle,GO:0048471~perinuclear region of cytoplasm,	GO:0000166~nucleotide binding,GO:0004008~copper-exporting ATPase activity,GO:0005507~copper ion binding,	IPR001757:Cation-transporting P-type ATPase,IPR006121:Heavy metal-associated domain, HMA,IPR006122:Heavy metal-associated domain, copper ion-binding,IPR008250:P-type ATPase, A domain,IPR017969:Heavy-metal-associated, conserved site,IPR018303:P-type ATPase, phosphorylation site,IPR023214:HAD-like domain,IPR023299:P-type ATPase, cytoplasmic domain N,IPR027256:Cation-transporting P-type ATPase, subf…				Complete proteome,Hydrolase,Membrane,Reference proteome,Transmembrane,Transmembrane helix,
E1BC78	ATPase family, AAA domain containing 2(ATAD2)	Bos taurus		GO:0006355~regulation of transcription, DNA-templated,GO:0031936~negative regulation of chromatin silencing,GO:0045944~positive regulation of transcription from RNA polymerase II promoter,	GO:0005634~nucleus,GO:0005654~nucleoplasm,GO:0070062~extracellular exosome,	GO:0003682~chromatin binding,GO:0005524~ATP binding,GO:0016887~ATPase activity,GO:0042393~histone binding,	IPR001487:Bromodomain,IPR003593:AAA+ ATPase domain,IPR003959:ATPase, AAA-type, core,IPR003960:ATPase, AAA-type, conserved site,IPR027417:P-loop containing nucleoside triphosphate hydrolase,			SM00297:BROMO,SM00382:AAA,	Complete proteome,Reference proteome,
A7YWC4	ATPase family, AAA domain containing 3A(ATAD3A)	Bos taurus			GO:0005743~mitochondrial inner membrane,GO:0016021~integral component of membrane,GO:0042645~mitochondrial nucleoid,	GO:0005524~ATP binding,	IPR003593:AAA+ ATPase domain,IPR003959:ATPase, AAA-type, core,IPR021911:ATPase family AAA domain-containing protein 3, domain of unknown function DUF3523,IPR027417:P-loop containing nucleoside triphosphate hydrolase,			SM00382:AAA,	Acetylation,ATP-binding,Coiled coil,Complete proteome,Membrane,Mitochondrion,Mitochondrion inner membrane,Mitochondrion nucleoid,Nucleotide-binding,Reference proteome,Transmembrane,Transmembrane helix,	chain:ATPase family AAA domain-containing protein 3,modified residue,nucleotide phosphate-binding region:ATP,
E1BCE1	ATPase family, AAA domain containing 5(ATAD5)	Bos taurus				GO:0005524~ATP binding,	IPR003593:AAA+ ATPase domain,IPR003959:ATPase, AAA-type, core,IPR027417:P-loop containing nucleoside triphosphate hydrolase,			SM00382:AAA,	Complete proteome,Reference proteome,
P01096	ATPase inhibitory factor 1(ATPIF1)	Bos taurus		GO:0001937~negative regulation of endothelial cell proliferation,GO:0006783~heme biosynthetic process,GO:0009396~folic acid-containing compound biosynthetic process,GO:0030218~erythrocyte differentiation,GO:0032780~negative regulation of ATPase activity,GO:0035999~tetrahydrofolate interconversion,GO:0051260~protein homooligomerization,GO:0051289~protein homotetramerization,GO:0051346~negative reg…	GO:0005739~mitochondrion,GO:0009986~cell surface,	GO:0005515~protein binding,GO:0005516~calmodulin binding,GO:0030272~5-formyltetrahydrofolate cyclo-ligase activity,GO:0042030~ATPase inhibitor activity,GO:0042803~protein homodimerization activity,GO:0043532~angiostatin binding,GO:0051117~ATPase binding,	IPR007648:ATPase inhibitor, IATP, mitochondria,				3D-structure,Coiled coil,Complete proteome,Direct protein sequencing,Mitochondrion,Reference proteome,Transit peptide,	chain:ATPase inhibitor, mitochondrial,helix,sequence conflict,transit peptide:Mitochondrion,
E1BNB9	ATPase phospholipid transporting 10B (putative)(ATP10B)	Bos taurus			GO:0005783~endoplasmic reticulum,GO:0005886~plasma membrane,GO:0016021~integral component of membrane,	GO:0000287~magnesium ion binding,GO:0004012~phospholipid-translocating ATPase activity,GO:0005524~ATP binding,	IPR001757:Cation-transporting P-type ATPase,IPR006539:Phospholipid-transporting P-type ATPase, subfamily IV,IPR008250:P-type ATPase, A domain,IPR018303:P-type ATPase, phosphorylation site,IPR023214:HAD-like domain,IPR023299:P-type ATPase, cytoplasmic domain N,				ATP-binding,Complete proteome,Hydrolase,Magnesium,Membrane,Nucleotide-binding,Reference proteome,Transmembrane,Transmembrane helix,
A7Z029	ATPase phospholipid transporting 10D (putative)(ATP10D)	Bos taurus			GO:0005654~nucleoplasm,GO:0005783~endoplasmic reticulum,GO:0005886~plasma membrane,GO:0016021~integral component of membrane,	GO:0000287~magnesium ion binding,GO:0004012~phospholipid-translocating ATPase activity,GO:0005524~ATP binding,	IPR001757:Cation-transporting P-type ATPase,IPR006539:Phospholipid-transporting P-type ATPase, subfamily IV,IPR008250:P-type ATPase, A domain,IPR018303:P-type ATPase, phosphorylation site,IPR023214:HAD-like domain,IPR023299:P-type ATPase, cytoplasmic domain N,				ATP-binding,Complete proteome,Hydrolase,Magnesium,Membrane,Nucleotide-binding,Reference proteome,Transmembrane,Transmembrane helix,
F1N0J3	ATPase phospholipid transporting 11A(ATP11A)	Bos taurus			GO:0005765~lysosomal membrane,GO:0005783~endoplasmic reticulum,GO:0005886~plasma membrane,GO:0016021~integral component of membrane,GO:0055037~recycling endosome,	GO:0000287~magnesium ion binding,GO:0004012~phospholipid-translocating ATPase activity,GO:0005524~ATP binding,	IPR001757:Cation-transporting P-type ATPase,IPR006539:Phospholipid-transporting P-type ATPase, subfamily IV,IPR008250:P-type ATPase, A domain,IPR018303:P-type ATPase, phosphorylation site,IPR023214:HAD-like domain,IPR023299:P-type ATPase, cytoplasmic domain N,				ATP-binding,Complete proteome,Hydrolase,Magnesium,Membrane,Nucleotide-binding,Reference proteome,Transmembrane,Transmembrane helix,
E1BN98	ATPase phospholipid transporting 8A1(ATP8A1)	Bos taurus		GO:0007612~learning,GO:0030335~positive regulation of cell migration,GO:0045332~phospholipid translocation,GO:0048194~Golgi vesicle budding,GO:0061092~positive regulation of phospholipid translocation,	GO:0000139~Golgi membrane,GO:0005783~endoplasmic reticulum,GO:0005794~Golgi apparatus,GO:0005802~trans-Golgi network,GO:0005886~plasma membrane,GO:0016021~integral component of membrane,GO:0042584~chromaffin granule membrane,GO:0070062~extracellular exosome,	GO:0000287~magnesium ion binding,GO:0004012~phospholipid-translocating ATPase activity,GO:0005524~ATP binding,	IPR001757:Cation-transporting P-type ATPase,IPR006539:Phospholipid-transporting P-type ATPase, subfamily IV,IPR008250:P-type ATPase, A domain,IPR018303:P-type ATPase, phosphorylation site,IPR023214:HAD-like domain,IPR023299:P-type ATPase, cytoplasmic domain N,				ATP-binding,Cell membrane,Complete proteome,Cytoplasmic vesicle,Direct protein sequencing,Endoplasmic reticulum,Golgi apparatus,Hydrolase,Magnesium,Membrane,Metal-binding,Nucleotide-binding,Phosphoprotein,Reference proteome,Transmembrane,Transmembrane helix,	active site:4-aspartylphosphate intermediate,chain:Probable phospholipid-transporting ATPase IA,metal ion-binding site:Magnesium,modified residue,nucleotide phosphate-binding region:ATP,topological domain:Cytoplasmic,topological domain:Extracellular,transmembrane region,
E1BPC3	ATPase phospholipid transporting 8B1(ATP8B1)	Bos taurus		GO:0006855~drug transmembrane transport,GO:0007030~Golgi organization,GO:0007605~sensory perception of sound,GO:0008206~bile acid metabolic process,GO:0021650~vestibulocochlear nerve formation,GO:0032534~regulation of microvillus assembly,GO:0045892~negative regulation of transcription, DNA-templated,GO:0060119~inner ear receptor cell development,	GO:0005783~endoplasmic reticulum,GO:0005794~Golgi apparatus,GO:0005886~plasma membrane,GO:0016021~integral component of membrane,GO:0016324~apical plasma membrane,GO:0032420~stereocilium,	GO:0000287~magnesium ion binding,GO:0004012~phospholipid-translocating ATPase activity,GO:0005524~ATP binding,GO:1901612~cardiolipin binding,	IPR001757:Cation-transporting P-type ATPase,IPR006539:Phospholipid-transporting P-type ATPase, subfamily IV,IPR008250:P-type ATPase, A domain,IPR018303:P-type ATPase, phosphorylation site,IPR023214:HAD-like domain,IPR023299:P-type ATPase, cytoplasmic domain N,				ATP-binding,Complete proteome,Hydrolase,Magnesium,Membrane,Nucleotide-binding,Reference proteome,Transmembrane,Transmembrane helix,
F1N4D5	ATPase phospholipid transporting 8B2(ATP8B2)	Bos taurus		GO:0007030~Golgi organization,	GO:0005794~Golgi apparatus,GO:0005886~plasma membrane,GO:0016021~integral component of membrane,	GO:0000287~magnesium ion binding,GO:0004012~phospholipid-translocating ATPase activity,GO:0005524~ATP binding,	IPR001757:Cation-transporting P-type ATPase,IPR006539:Phospholipid-transporting P-type ATPase, subfamily IV,IPR008250:P-type ATPase, A domain,IPR018303:P-type ATPase, phosphorylation site,IPR023214:HAD-like domain,IPR023299:P-type ATPase, cytoplasmic domain N,				ATP-binding,Complete proteome,Hydrolase,Magnesium,Membrane,Nucleotide-binding,Reference proteome,Transmembrane,Transmembrane helix,
F1MMX5	ATPase phospholipid transporting 8B4 (putative)(ATP8B4)	Bos taurus		GO:0007030~Golgi organization,	GO:0005794~Golgi apparatus,GO:0005886~plasma membrane,GO:0016021~integral component of membrane,	GO:0000287~magnesium ion binding,GO:0004012~phospholipid-translocating ATPase activity,GO:0005524~ATP binding,	IPR001757:Cation-transporting P-type ATPase,IPR006539:Phospholipid-transporting P-type ATPase, subfamily IV,IPR008250:P-type ATPase, A domain,IPR018303:P-type ATPase, phosphorylation site,IPR023214:HAD-like domain,IPR023299:P-type ATPase, cytoplasmic domain N,				ATP-binding,Complete proteome,Hydrolase,Magnesium,Membrane,Nucleotide-binding,Reference proteome,Transmembrane,Transmembrane helix,
F1MN60	ATPase plasma membrane Ca2+ transporting 2(ATP2B2)	Bos taurus		GO:0006996~organelle organization,GO:0007595~lactation,GO:0007626~locomotory behavior,GO:0008361~regulation of cell size,GO:0021702~cerebellar Purkinje cell differentiation,GO:0021707~cerebellar granule cell differentiation,GO:0040011~locomotion,GO:0042428~serotonin metabolic process,GO:0045299~otolith mineralization,GO:0046068~cGMP metabolic process,GO:0048167~regulation of synaptic plasticity,G…	GO:0005783~endoplasmic reticulum,GO:0005887~integral component of plasma membrane,GO:0005929~cilium,GO:0016324~apical plasma membrane,GO:0043025~neuronal cell body,GO:0043231~intracellular membrane-bounded organelle,GO:0070062~extracellular exosome,	GO:0005388~calcium-transporting ATPase activity,GO:0005524~ATP binding,GO:0030165~PDZ domain binding,GO:0030899~calcium-dependent ATPase activity,GO:0046872~metal ion binding,	IPR001757:Cation-transporting P-type ATPase,IPR004014:Cation-transporting P-type ATPase, N-terminal,IPR006068:Cation-transporting P-type ATPase, C-terminal,IPR006408:Calcium-transporting P-type ATPase, subfamily IIB,IPR008250:P-type ATPase, A domain,IPR018303:P-type ATPase, phosphorylation site,IPR022141:Calcium transporting P-type ATPase, C-terminal, plasma membrane,IPR023214:HAD-like domain,IPR…	bta04020:Calcium signaling pathway,bta04022:cGMP-PKG signaling pathway,bta04024:cAMP signaling pathway,bta04261:Adrenergic signaling in cardiomyocytes,bta04970:Salivary secretion,bta04972:Pancreatic secretion,		SM00831:SM00831,	ATP-binding,Calcium,Calcium transport,Complete proteome,Hydrolase,Ion transport,Membrane,Nucleotide-binding,Reference proteome,Transmembrane,Transmembrane helix,Transport,
D3K0R6	ATPase plasma membrane Ca2+ transporting 4(ATP2B4)	Bos taurus		GO:0006357~regulation of transcription from RNA polymerase II promoter,GO:0006874~cellular calcium ion homeostasis,GO:0010751~negative regulation of nitric oxide mediated signal transduction,GO:0030317~sperm motility,GO:0033138~positive regulation of peptidyl-serine phosphorylation,GO:0045019~negative regulation of nitric oxide biosynthetic process,GO:0051001~negative regulation of nitric-oxide s…	GO:0005886~plasma membrane,GO:0005887~integral component of plasma membrane,GO:0016021~integral component of membrane,GO:0030018~Z disc,GO:0030315~T-tubule,GO:0036126~sperm flagellum,GO:0043231~intracellular membrane-bounded organelle,	GO:0005388~calcium-transporting ATPase activity,GO:0005516~calmodulin binding,GO:0005524~ATP binding,GO:0030165~PDZ domain binding,GO:0036487~nitric-oxide synthase inhibitor activity,GO:0046872~metal ion binding,	IPR001757:Cation-transporting P-type ATPase,IPR004014:Cation-transporting P-type ATPase, N-terminal,IPR006068:Cation-transporting P-type ATPase, C-terminal,IPR006408:Calcium-transporting P-type ATPase, subfamily IIB,IPR008250:P-type ATPase, A domain,IPR018303:P-type ATPase, phosphorylation site,IPR022141:Calcium transporting P-type ATPase, C-terminal, plasma membrane,IPR023214:HAD-like domain,IPR…	bta04020:Calcium signaling pathway,bta04022:cGMP-PKG signaling pathway,bta04024:cAMP signaling pathway,bta04261:Adrenergic signaling in cardiomyocytes,bta04970:Salivary secretion,bta04972:Pancreatic secretion,		SM00831:SM00831,	Alternative splicing,ATP-binding,Calcium,Calcium transport,Calmodulin-binding,Cell membrane,Cell projection,Complete proteome,Hydrolase,Ion transport,Magnesium,Membrane,Metal-binding,Nucleotide-binding,Phosphoprotein,Reference proteome,Transmembrane,Transmembrane helix,Transport,
F1MPR3	ATPase sarcoplasmic/endoplasmic reticulum Ca2+ transporting 2(ATP2A2)	Bos taurus		GO:0002026~regulation of the force of heart contraction,GO:0006874~cellular calcium ion homeostasis,GO:0006984~ER-nucleus signaling pathway,GO:0006996~organelle organization,GO:0010882~regulation of cardiac muscle contraction by calcium ion signaling,GO:0014883~transition between fast and slow fiber,GO:0014898~cardiac muscle hypertrophy in response to stress,GO:0032470~positive regulation of endo…	GO:0005887~integral component of plasma membrane,GO:0033017~sarcoplasmic reticulum membrane,GO:0097470~ribbon synapse,	GO:0005509~calcium ion binding,GO:0005524~ATP binding,GO:0086039~calcium-transporting ATPase activity involved in regulation of cardiac muscle cell membrane potential,	IPR001757:Cation-transporting P-type ATPase,IPR004014:Cation-transporting P-type ATPase, N-terminal,IPR005782:Calcium-transporting P-type ATPase, subfamily IIA, SERCA-type,IPR006068:Cation-transporting P-type ATPase, C-terminal,IPR008250:P-type ATPase, A domain,IPR018303:P-type ATPase, phosphorylation site,IPR023214:HAD-like domain,IPR023298:P-type ATPase, transmembrane domain,IPR023299:P-type AT…	bta04020:Calcium signaling pathway,bta04022:cGMP-PKG signaling pathway,bta04972:Pancreatic secretion,bta05010:Alzheimer's disease,		SM00831:SM00831,	ATP-binding,Calcium,Calcium transport,Complete proteome,Hydrolase,Ion transport,Membrane,Nucleotide-binding,Reference proteome,Transmembrane,Transmembrane helix,Transport,
E1BMQ6	ATPase sarcoplasmic/endoplasmic reticulum Ca2+ transporting 3(ATP2A3)	Bos taurus		GO:0006874~cellular calcium ion homeostasis,	GO:0005887~integral component of plasma membrane,GO:0033017~sarcoplasmic reticulum membrane,	GO:0005388~calcium-transporting ATPase activity,GO:0005524~ATP binding,GO:0046872~metal ion binding,	IPR001757:Cation-transporting P-type ATPase,IPR004014:Cation-transporting P-type ATPase, N-terminal,IPR005782:Calcium-transporting P-type ATPase, subfamily IIA, SERCA-type,IPR006068:Cation-transporting P-type ATPase, C-terminal,IPR008250:P-type ATPase, A domain,IPR018303:P-type ATPase, phosphorylation site,IPR023214:HAD-like domain,IPR023298:P-type ATPase, transmembrane domain,IPR023299:P-type AT…	bta04020:Calcium signaling pathway,bta04022:cGMP-PKG signaling pathway,bta04972:Pancreatic secretion,bta05010:Alzheimer's disease,		SM00831:SM00831,	ATP-binding,Calcium,Calcium transport,Complete proteome,Hydrolase,Ion transport,Membrane,Nucleotide-binding,Reference proteome,Transmembrane,Transmembrane helix,Transport,
P57709	ATPase secretory pathway Ca2+ transporting 1(ATP2C1)	Bos taurus		GO:0006816~calcium ion transport,GO:0006828~manganese ion transport,GO:0006874~cellular calcium ion homeostasis,GO:0007165~signal transduction,GO:0008544~epidermis development,GO:0016339~calcium-dependent cell-cell adhesion via plasma membrane cell adhesion molecules,GO:0030026~cellular manganese ion homeostasis,GO:0031532~actin cytoskeleton reorganization,GO:0032468~Golgi calcium ion homeostasis…	GO:0000139~Golgi membrane,GO:0005794~Golgi apparatus,GO:0005802~trans-Golgi network,GO:0005887~integral component of plasma membrane,	GO:0004871~signal transducer activity,GO:0005388~calcium-transporting ATPase activity,GO:0005509~calcium ion binding,GO:0005524~ATP binding,GO:0015410~manganese-transporting ATPase activity,GO:0030145~manganese ion binding,	IPR001757:Cation-transporting P-type ATPase,IPR004014:Cation-transporting P-type ATPase, N-terminal,IPR006068:Cation-transporting P-type ATPase, C-terminal,IPR006413:Calcium-transporting P-type ATPase, subfamily IIA, PMR1-type,IPR008250:P-type ATPase, A domain,IPR018303:P-type ATPase, phosphorylation site,IPR023214:HAD-like domain,IPR023298:P-type ATPase, transmembrane domain,			SM00831:SM00831,	ATP-binding,Calcium,Calcium transport,Complete proteome,Golgi apparatus,Hydrolase,Ion transport,Magnesium,Membrane,Metal-binding,Nucleotide-binding,Reference proteome,Transmembrane,Transmembrane helix,Transport,	active site:4-aspartylphosphate intermediate,chain:Calcium-transporting ATPase type 2C member 1,metal ion-binding site:Calcium 2,metal ion-binding site:Calcium 2; via carbonyl oxygen,metal ion-binding site:Magnesium,topological domain:Cytoplasmic,topological domain:Lumenal,transmembrane region,
F1MMF3	ATPase secretory pathway Ca2+ transporting 2(ATP2C2)	Bos taurus		GO:0006874~cellular calcium ion homeostasis,GO:0061180~mammary gland epithelium development,GO:0072661~protein targeting to plasma membrane,GO:0090280~positive regulation of calcium ion import,	GO:0000139~Golgi membrane,GO:0005887~integral component of plasma membrane,GO:0009898~cytoplasmic side of plasma membrane,GO:0031410~cytoplasmic vesicle,GO:0048471~perinuclear region of cytoplasm,	GO:0005388~calcium-transporting ATPase activity,GO:0005524~ATP binding,GO:0015410~manganese-transporting ATPase activity,GO:0046872~metal ion binding,	IPR001757:Cation-transporting P-type ATPase,IPR004014:Cation-transporting P-type ATPase, N-terminal,IPR006068:Cation-transporting P-type ATPase, C-terminal,IPR006413:Calcium-transporting P-type ATPase, subfamily IIA, PMR1-type,IPR008250:P-type ATPase, A domain,IPR018303:P-type ATPase, phosphorylation site,IPR023214:HAD-like domain,IPR023298:P-type ATPase, transmembrane domain,IPR023299:P-type ATP…			SM00831:SM00831,	ATP-binding,Calcium,Calcium transport,Complete proteome,Hydrolase,Ion transport,Membrane,Nucleotide-binding,Reference proteome,Transmembrane,Transmembrane helix,Transport,
A2VDL6	ATPase, Na+/K+ transporting, alpha 2 polypeptide(ATP1A2)	Bos taurus		GO:0001504~neurotransmitter uptake,GO:0002026~regulation of the force of heart contraction,GO:0002087~regulation of respiratory gaseous exchange by neurological system process,GO:0006883~cellular sodium ion homeostasis,GO:0006940~regulation of smooth muscle contraction,GO:0008217~regulation of blood pressure,GO:0008344~adult locomotory behavior,GO:0008542~visual learning,GO:0010107~potassium ion …	GO:0005737~cytoplasm,GO:0005887~integral component of plasma membrane,GO:0005890~sodium:potassium-exchanging ATPase complex,GO:0030315~T-tubule,GO:0043209~myelin sheath,GO:0043231~intracellular membrane-bounded organelle,GO:1903561~extracellular vesicle,	GO:0005391~sodium:potassium-exchanging ATPase activity,GO:0005524~ATP binding,GO:0008144~drug binding,GO:0030955~potassium ion binding,GO:0031402~sodium ion binding,GO:0051087~chaperone binding,GO:1990239~steroid hormone binding,	IPR001757:Cation-transporting P-type ATPase,IPR004014:Cation-transporting P-type ATPase, N-terminal,IPR005775:Sodium/potassium-transporting P-type ATPase, subfamily IIC,IPR006068:Cation-transporting P-type ATPase, C-terminal,IPR008250:P-type ATPase, A domain,IPR018303:P-type ATPase, phosphorylation site,IPR023214:HAD-like domain,IPR023298:P-type ATPase, transmembrane domain,IPR023299:P-type ATPas…	bta04022:cGMP-PKG signaling pathway,bta04024:cAMP signaling pathway,bta04260:Cardiac muscle contraction,bta04261:Adrenergic signaling in cardiomyocytes,bta04911:Insulin secretion,bta04918:Thyroid hormone synthesis,bta04919:Thyroid hormone signaling pathway,bta04960:Aldosterone-regulated sodium reabsorption,bta04961:Endocrine and other factor-regulated calcium reabsorption,bta04964:Proximal tubule…		SM00831:SM00831,	ATP-binding,Cell membrane,Complete proteome,Hydrolase,Ion transport,Magnesium,Membrane,Metal-binding,Nucleotide-binding,Phosphoprotein,Potassium,Potassium transport,Reference proteome,Sodium,Sodium transport,Sodium/potassium transport,Transmembrane,Transmembrane helix,Transport,	active site:4-aspartylphosphate intermediate,chain:Sodium/potassium-transporting ATPase subunit alpha-2,metal ion-binding site:Magnesium,modified residue,region of interest:Interaction with phosphoinositide-3 kinase,topological domain:Cytoplasmic,topological domain:Lumenal,transmembrane region,
F1N7C2, C7EXK4	ATPase, aminophospholipid transporter, class I, type 8A, member 2(ATP8A2)	Bos taurus		GO:0045332~phospholipid translocation,	GO:0005768~endosome,GO:0005794~Golgi apparatus,GO:0016021~integral component of membrane,GO:0097381~photoreceptor disc membrane,	GO:0000287~magnesium ion binding,GO:0004012~phospholipid-translocating ATPase activity,GO:0005524~ATP binding,	IPR001757:Cation-transporting P-type ATPase,IPR006539:Phospholipid-transporting P-type ATPase, subfamily IV,IPR008250:P-type ATPase, A domain,IPR018303:P-type ATPase, phosphorylation site,IPR023214:HAD-like domain,IPR023299:P-type ATPase, cytoplasmic domain N,				ATP-binding,Cell membrane,Cell projection,Complete proteome,Endosome,Golgi apparatus,Hydrolase,Lipid transport,Magnesium,Membrane,Metal-binding,Nucleotide-binding,Phosphoprotein,Reference proteome,Transmembrane,Transmembrane helix,Transport,
F1MFC4, Q0II98	ATPase, aminophospholipid transporter, class I, type 8B, member 3(ATP8B3)	Bos taurus		GO:0007030~Golgi organization,GO:0007339~binding of sperm to zona pellucida,	GO:0001669~acrosomal vesicle,GO:0005794~Golgi apparatus,GO:0005886~plasma membrane,GO:0016021~integral component of membrane,	GO:0000287~magnesium ion binding,GO:0004012~phospholipid-translocating ATPase activity,GO:0005524~ATP binding,	IPR001757:Cation-transporting P-type ATPase,IPR006539:Phospholipid-transporting P-type ATPase, subfamily IV,IPR008250:P-type ATPase, A domain,IPR018303:P-type ATPase, phosphorylation site,IPR023214:HAD-like domain,IPR023299:P-type ATPase, cytoplasmic domain N,				ATP-binding,Complete proteome,Hydrolase,Magnesium,Membrane,Nucleotide-binding,Reference proteome,Transmembrane,Transmembrane helix,
F1MW32	ATPase, class VI, type 11B(ATP11B)	Bos taurus			GO:0005783~endoplasmic reticulum,GO:0005886~plasma membrane,GO:0016021~integral component of membrane,GO:0055037~recycling endosome,	GO:0000287~magnesium ion binding,GO:0004012~phospholipid-translocating ATPase activity,GO:0005524~ATP binding,	IPR001757:Cation-transporting P-type ATPase,IPR006539:Phospholipid-transporting P-type ATPase, subfamily IV,IPR008250:P-type ATPase, A domain,IPR018303:P-type ATPase, phosphorylation site,IPR023214:HAD-like domain,IPR023299:P-type ATPase, cytoplasmic domain N,				ATP-binding,Complete proteome,Hydrolase,Magnesium,Membrane,Nucleotide-binding,Reference proteome,Transmembrane,Transmembrane helix,
A5D7S1	ATR interacting protein(ATRIP)	Bos taurus		GO:0000077~DNA damage checkpoint,				bta03460:Fanconi anemia pathway,			Coiled coil,Complete proteome,Reference proteome,
F1MLY7	ATR serine/threonine kinase(ATR)	Bos taurus		GO:0000077~DNA damage checkpoint,GO:0006281~DNA repair,GO:0008156~negative regulation of DNA replication,GO:0018105~peptidyl-serine phosphorylation,GO:0034644~cellular response to UV,GO:0043517~positive regulation of DNA damage response, signal transduction by p53 class mediator,GO:0046777~protein autophosphorylation,GO:0070198~protein localization to chromosome, telomeric region,GO:0071480~cellu…	GO:0005634~nucleus,GO:0005794~Golgi apparatus,GO:0016605~PML body,	GO:0004674~protein serine/threonine kinase activity,GO:0005524~ATP binding,GO:0016301~kinase activity,	IPR000403:Phosphatidylinositol 3-/4-kinase, catalytic domain,IPR003151:PIK-related kinase, FAT,IPR003152:PIK-related kinase, FATC,IPR011009:Protein kinase-like domain,IPR011989:Armadillo-like helical,IPR011990:Tetratricopeptide-like helical,IPR012993:UME,IPR014009:PIK-related kinase,IPR016024:Armadillo-type fold,IPR018936:Phosphatidylinositol 3/4-kinase, conserved site,IPR021133:HEAT, type 2,	bta03460:Fanconi anemia pathway,bta04110:Cell cycle,bta04115:p53 signaling pathway,bta05166:HTLV-I infection,		SM00146:PI3Kc,SM00802:UME,SM01343:SM01343,	ATP-binding,Complete proteome,Kinase,Nucleotide-binding,Reference proteome,Transferase,
F1MQ85	ATRX, chromatin remodeler(ATRX)	Bos taurus		GO:0006336~DNA replication-independent nucleosome assembly,GO:0006338~chromatin remodeling,GO:0007283~spermatogenesis,GO:0010571~positive regulation of nuclear cell cycle DNA replication,GO:0030330~DNA damage response, signal transduction by p53 class mediator,GO:0030900~forebrain development,GO:0031297~replication fork processing,GO:0032206~positive regulation of telomere maintenance,GO:0035128~…	GO:0000784~nuclear chromosome, telomeric region,GO:0005721~pericentric heterochromatin,GO:0016605~PML body,GO:0031933~telomeric heterochromatin,GO:0070603~SWI/SNF superfamily-type complex,GO:1990707~nuclear subtelomeric heterochromatin,	GO:0003682~chromatin binding,GO:0005524~ATP binding,GO:0015616~DNA translocase activity,	IPR000330:SNF2-related,IPR001650:Helicase, C-terminal,IPR011011:Zinc finger, FYVE/PHD-type,IPR013083:Zinc finger, RING/FYVE/PHD-type,IPR014001:Helicase, superfamily 1/2, ATP-binding domain,IPR025766:ADD domain,IPR027417:P-loop containing nucleoside triphosphate hydrolase,			SM00487:DEXDc,SM00490:HELICc,	Coiled coil,Complete proteome,Reference proteome,
F1MGJ7	AU RNA binding methylglutaconyl-CoA hydratase(AUH)	Bos taurus		GO:0006635~fatty acid beta-oxidation,GO:0008152~metabolic process,	GO:0005739~mitochondrion,	GO:0003730~mRNA 3'-UTR binding,GO:0003824~catalytic activity,GO:0004300~enoyl-CoA hydratase activity,GO:0004490~methylglutaconyl-CoA hydratase activity,	IPR001753:Crotonase superfamily,IPR014748:Crontonase, C-terminal,				Complete proteome,Proteomics identification,Reference proteome,
F1N025	AVL9 cell migration associated(AVL9)	Bos taurus		GO:0016477~cell migration,	GO:0055037~recycling endosome,		IPR018307:Late secretory pathway protein AVL9,				Complete proteome,Reference proteome,
E1BFN3	Abelson helper integration site 1(AHI1)	Bos taurus		GO:0001738~morphogenesis of a polarized epithelium,GO:0001947~heart looping,GO:0002092~positive regulation of receptor internalization,GO:0007169~transmembrane receptor protein tyrosine kinase signaling pathway,GO:0007417~central nervous system development,GO:0010842~retina layer formation,GO:0016192~vesicle-mediated transport,GO:0030862~positive regulation of polarized epithelial cell differenti…	GO:0005813~centrosome,GO:0005814~centriole,GO:0005911~cell-cell junction,GO:0005912~adherens junction,GO:0005929~cilium,GO:0031513~nonmotile primary cilium,GO:0036064~ciliary basal body,GO:0072372~primary cilium,		IPR001452:Src homology-3 domain,IPR001680:WD40 repeat,IPR015943:WD40/YVTN repeat-like-containing domain,IPR017986:WD40-repeat-containing domain,IPR019775:WD40 repeat, conserved site,			SM00320:WD40,SM00326:SH3,	Complete proteome,Reference proteome,SH3 domain,
F1N4T8	Alport syndrome, mental retardation, midface hypoplasia and elliptocytosis chromosomal region gene 1(AMMECR1)	Bos taurus					IPR002733:AMMECR1 domain,IPR023473:AMMECR1,IPR027485:AMMECR1, N-terminal,				Complete proteome,Reference proteome,
Q3T0I4	Aly/REF export factor(ALYREF)	Bos taurus		GO:0006397~mRNA processing,GO:0008380~RNA splicing,GO:0051028~mRNA transport,	GO:0005681~spliceosomal complex,GO:0005737~cytoplasm,GO:0016607~nuclear speck,	GO:0000166~nucleotide binding,GO:0003723~RNA binding,	IPR000504:RNA recognition motif domain,IPR012677:Nucleotide-binding, alpha-beta plait,IPR025715:Friend of PRMT1 duplication,	bta03013:RNA transport,bta03015:mRNA surveillance pathway,bta03040:Spliceosome,bta05168:Herpes simplex infection,		SM00360:RRM,SM01218:SM01218,	Acetylation,Chaperone,Citrullination,Complete proteome,Cytoplasm,Methylation,mRNA processing,mRNA splicing,mRNA transport,Nucleus,Phosphoprotein,Reference proteome,RNA-binding,Spliceosome,Transport,	chain:THO complex subunit 4,compositionally biased region:Ala/Arg/Gly-rich,domain:RRM,modified residue,
E1BIQ2	ArfGAP with GTPase domain, ankyrin repeat and PH domain 2(AGAP2)	Bos taurus		GO:0007264~small GTPase mediated signal transduction,GO:0033601~positive regulation of mammary gland epithelial cell proliferation,GO:0043066~negative regulation of apoptotic process,GO:0045944~positive regulation of transcription from RNA polymerase II promoter,GO:0046427~positive regulation of JAK-STAT cascade,GO:0060749~mammary gland alveolus development,	GO:0005622~intracellular,	GO:0005096~GTPase activator activity,GO:0005525~GTP binding,	IPR001164:Arf GTPase activating protein,IPR001806:Small GTPase superfamily,IPR001849:Pleckstrin homology domain,IPR002110:Ankyrin repeat,IPR011993:Pleckstrin homology-like domain,IPR020683:Ankyrin repeat-containing domain,IPR027417:P-loop containing nucleoside triphosphate hydrolase,	bta04068:FoxO signaling pathway,bta04144:Endocytosis,		SM00105:ArfGap,SM00233:PH,SM00248:ANK,	ANK repeat,Complete proteome,Reference proteome,
E1BB02	ArfGAP with GTPase domain, ankyrin repeat and PH domain 3(AGAP3)	Bos taurus		GO:0007264~small GTPase mediated signal transduction,	GO:0005622~intracellular,	GO:0005096~GTPase activator activity,GO:0005525~GTP binding,	IPR001164:Arf GTPase activating protein,IPR001806:Small GTPase superfamily,IPR001849:Pleckstrin homology domain,IPR002110:Ankyrin repeat,IPR011993:Pleckstrin homology-like domain,IPR020683:Ankyrin repeat-containing domain,IPR027417:P-loop containing nucleoside triphosphate hydrolase,	bta04144:Endocytosis,		SM00105:ArfGap,SM00233:PH,	Complete proteome,Reference proteome,
O97902	ArfGAP with SH3 domain, ankyrin repeat and PH domain 1(ASAP1)	Bos taurus		GO:0043547~positive regulation of GTPase activity,GO:0060271~cilium morphogenesis,GO:0061000~negative regulation of dendritic spine development,	GO:0005737~cytoplasm,GO:0016020~membrane,GO:0043197~dendritic spine,	GO:0005096~GTPase activator activity,GO:0005546~phosphatidylinositol-4,5-bisphosphate binding,GO:0005547~phosphatidylinositol-3,4,5-trisphosphate binding,GO:0046872~metal ion binding,	IPR001164:Arf GTPase activating protein,IPR001452:Src homology-3 domain,IPR001849:Pleckstrin homology domain,IPR002110:Ankyrin repeat,IPR011993:Pleckstrin homology-like domain,IPR020683:Ankyrin repeat-containing domain,IPR027267:Arfaptin homology (AH) domain/BAR domain,	bta04144:Endocytosis,bta04666:Fc gamma R-mediated phagocytosis,		SM00105:ArfGap,SM00233:PH,SM00248:ANK,SM00326:SH3,	ANK repeat,Cilium biogenesis/degradation,Complete proteome,Cytoplasm,Direct protein sequencing,GTPase activation,Membrane,Metal-binding,Phosphoprotein,Reference proteome,Repeat,SH3 domain,Zinc,Zinc-finger,	chain:Arf-GAP with SH3 domain, ANK repeat and PH domain-containing protein 1,compositionally biased region:Pro-rich,domain:Arf-GAP,domain:PH,domain:SH3,modified residue,repeat:ANK 1,repeat:ANK 2,sequence conflict,zinc finger region:C4-type,
F1MKZ2	ArfGAP with SH3 domain, ankyrin repeat and PH domain 2(ASAP2)	Bos taurus				GO:0005096~GTPase activator activity,	IPR001164:Arf GTPase activating protein,IPR001452:Src homology-3 domain,IPR001849:Pleckstrin homology domain,IPR002110:Ankyrin repeat,IPR011993:Pleckstrin homology-like domain,IPR020683:Ankyrin repeat-containing domain,IPR027267:Arfaptin homology (AH) domain/BAR domain,	bta04144:Endocytosis,bta04666:Fc gamma R-mediated phagocytosis,		SM00105:ArfGap,SM00233:PH,SM00248:ANK,SM00326:SH3,	ANK repeat,Complete proteome,Reference proteome,
F1N0S1	ArfGAP with SH3 domain, ankyrin repeat and PH domain 3(ASAP3)	Bos taurus		GO:0016477~cell migration,GO:0051492~regulation of stress fiber assembly,	GO:0001726~ruffle,GO:0005925~focal adhesion,	GO:0005096~GTPase activator activity,	IPR001164:Arf GTPase activating protein,IPR001849:Pleckstrin homology domain,IPR002110:Ankyrin repeat,IPR011993:Pleckstrin homology-like domain,IPR020683:Ankyrin repeat-containing domain,IPR027267:Arfaptin homology (AH) domain/BAR domain,	bta04144:Endocytosis,bta04666:Fc gamma R-mediated phagocytosis,		SM00105:ArfGap,SM00233:PH,SM00248:ANK,	ANK repeat,Coiled coil,Complete proteome,Reference proteome,
F1MZ03	ArfGAP with coiled-coil, ankyrin repeat and PH domains 2(ACAP2)	Bos taurus			GO:0016020~membrane,	GO:0005096~GTPase activator activity,	IPR001164:Arf GTPase activating protein,IPR001849:Pleckstrin homology domain,IPR002110:Ankyrin repeat,IPR011993:Pleckstrin homology-like domain,IPR020683:Ankyrin repeat-containing domain,IPR027267:Arfaptin homology (AH) domain/BAR domain,			SM00105:ArfGap,SM00233:PH,SM00248:ANK,	ANK repeat,Coiled coil,Complete proteome,Reference proteome,
A4IFL7	ArfGAP with coiled-coil, ankyrin repeat and PH domains 3(ACAP3)	Bos taurus				GO:0005096~GTPase activator activity,	IPR001164:Arf GTPase activating protein,IPR001849:Pleckstrin homology domain,IPR002110:Ankyrin repeat,IPR011993:Pleckstrin homology-like domain,IPR020683:Ankyrin repeat-containing domain,IPR027267:Arfaptin homology (AH) domain/BAR domain,	bta04144:Endocytosis,		SM00105:ArfGap,SM00233:PH,SM00248:ANK,	ANK repeat,Complete proteome,Reference proteome,
O02753	ArfGAP with dual PH domains 1(ADAP1)	Bos taurus			GO:0005634~nucleus,GO:0005737~cytoplasm,GO:0005886~plasma membrane,	GO:0005096~GTPase activator activity,	IPR001164:Arf GTPase activating protein,IPR001849:Pleckstrin homology domain,IPR011993:Pleckstrin homology-like domain,			SM00105:ArfGap,SM00233:PH,	Complete proteome,Reference proteome,
F1MZC2	ArfGAP with dual PH domains 2(ADAP2)	Bos taurus		GO:0007507~heart development,	GO:0005737~cytoplasm,GO:0005886~plasma membrane,	GO:0005096~GTPase activator activity,GO:0005547~phosphatidylinositol-3,4,5-trisphosphate binding,GO:0043533~inositol 1,3,4,5 tetrakisphosphate binding,	IPR001164:Arf GTPase activating protein,IPR001849:Pleckstrin homology domain,IPR011993:Pleckstrin homology-like domain,			SM00105:ArfGap,SM00233:PH,	Complete proteome,Reference proteome,
F1MDL4	B-Raf proto-oncogene, serine/threonine kinase(BRAF)	Bos taurus		GO:0002318~myeloid progenitor cell differentiation,GO:0008542~visual learning,GO:0010628~positive regulation of gene expression,GO:0010764~negative regulation of fibroblast migration,GO:0015758~glucose transport,GO:0030878~thyroid gland development,GO:0033138~positive regulation of peptidyl-serine phosphorylation,GO:0035019~somatic stem cell population maintenance,GO:0035556~intracellular signal …	GO:0005739~mitochondrion,GO:0005886~plasma membrane,GO:0043005~neuron projection,GO:0044297~cell body,	GO:0004674~protein serine/threonine kinase activity,GO:0005057~receptor signaling protein activity,GO:0005509~calcium ion binding,GO:0005524~ATP binding,	IPR000719:Protein kinase, catalytic domain,IPR001245:Serine-threonine/tyrosine-protein kinase catalytic domain,IPR002219:Protein kinase C-like, phorbol ester/diacylglycerol binding,IPR003116:Raf-like Ras-binding,IPR008271:Serine/threonine-protein kinase, active site,IPR011009:Protein kinase-like domain,IPR017441:Protein kinase, ATP binding site,IPR020454:Diacylglycerol/phorbol-ester binding,	bta04010:MAPK signaling pathway,bta04012:ErbB signaling pathway,bta04015:Rap1 signaling pathway,bta04024:cAMP signaling pathway,bta04062:Chemokine signaling pathway,bta04068:FoxO signaling pathway,bta04150:mTOR signaling pathway,bta04270:Vascular smooth muscle contraction,bta04510:Focal adhesion,bta04650:Natural killer cell mediated cytotoxicity,bta04720:Long-term potentiation,bta04722:Neurotroph…		SM00109:C1,SM00220:S_TKc,SM00455:RBD,	ATP-binding,Complete proteome,Kinase,Metal-binding,Nucleotide-binding,Reference proteome,Serine/threonine-protein kinase,Transferase,Zinc,
F1N507	B-TFIID TATA-box binding protein associated factor 1(BTAF1)	Bos taurus		GO:0035562~negative regulation of chromatin binding,	GO:0005654~nucleoplasm,	GO:0005524~ATP binding,	IPR000330:SNF2-related,IPR001650:Helicase, C-terminal,IPR011989:Armadillo-like helical,IPR014001:Helicase, superfamily 1/2, ATP-binding domain,IPR016024:Armadillo-type fold,IPR022707:Domain of unknown function DUF3535,IPR027417:P-loop containing nucleoside triphosphate hydrolase,			SM00487:DEXDc,SM00490:HELICc,	Complete proteome,Reference proteome,
F1MKU3	B-box and SPRY domain containing(BSPRY)	Bos taurus			GO:0005622~intracellular,	GO:0008270~zinc ion binding,	IPR000315:Zinc finger, B-box,IPR001870:B30.2/SPRY domain,IPR003877:SPla/RYanodine receptor SPRY,IPR003879:Butyrophylin-like,IPR006574:SPRY-associated,IPR013320:Concanavalin A-like lectin/glucanase, subgroup,			SM00449:SPRY,SM00589:PRY,	Coiled coil,Complete proteome,Reference proteome,
L8J2S5	B-cell CLL/lymphoma 10(BCL10)	Bos mutus		GO:0006915~apoptotic process,GO:0042981~regulation of apoptotic process,GO:0051092~positive regulation of NF-kappaB transcription factor activity,			IPR001315:Caspase Recruitment,IPR011029:Death-like domain,	bom04064:NF-kappa B signaling pathway,bom04660:T cell receptor signaling pathway,bom04662:B cell receptor signaling pathway,bom05152:Tuberculosis,
Q17QR0, A0A0A8JC39	B-cell CLL/lymphoma 11A(BCL11A)	Bos taurus		GO:0000122~negative regulation of transcription from RNA polymerase II promoter,GO:0006366~transcription from RNA polymerase II promoter,GO:0007165~signal transduction,GO:0022008~neurogenesis,	GO:0005634~nucleus,	GO:0001078~transcriptional repressor activity, RNA polymerase II core promoter proximal region sequence-specific binding,GO:0003676~nucleic acid binding,GO:0043565~sequence-specific DNA binding,GO:0044212~transcription regulatory region DNA binding,GO:0046872~metal ion binding,	IPR007087:Zinc finger, C2H2,IPR013087:Zinc finger C2H2-type/integrase DNA-binding domain,IPR015880:Zinc finger, C2H2-like,			SM00355:ZnF_C2H2,	Coiled coil,Complete proteome,Reference proteome,
E1BD25	B-cell CLL/lymphoma 11B(BCL11B)	Bos taurus		GO:0003334~keratinocyte development,GO:0003382~epithelial cell morphogenesis,GO:0007165~signal transduction,GO:0008285~negative regulation of cell proliferation,GO:0010837~regulation of keratinocyte proliferation,GO:0019216~regulation of lipid metabolic process,GO:0021773~striatal medium spiny neuron differentiation,GO:0021902~commitment of neuronal cell to specific neuron type in forebrain,GO:00…	GO:0005634~nucleus,GO:0043005~neuron projection,	GO:0000978~RNA polymerase II core promoter proximal region sequence-specific DNA binding,GO:0001077~transcriptional activator activity, RNA polymerase II core promoter proximal region sequence-specific binding,GO:0043565~sequence-specific DNA binding,GO:0044212~transcription regulatory region DNA binding,GO:0046872~metal ion binding,	IPR007087:Zinc finger, C2H2,IPR013087:Zinc finger C2H2-type/integrase DNA-binding domain,IPR015880:Zinc finger, C2H2-like,			SM00355:ZnF_C2H2,	Complete proteome,Reference proteome,
E1BCE6	B-cell CLL/lymphoma 3(BCL3)	Bos taurus	General function prediction only,	GO:0000060~protein import into nucleus, translocation,GO:0002268~follicular dendritic cell differentiation,GO:0002315~marginal zone B cell differentiation,GO:0002455~humoral immune response mediated by circulating immunoglobulin,GO:0002467~germinal center formation,GO:0006351~transcription, DNA-templated,GO:0006974~cellular response to DNA damage stimulus,GO:0007249~I-kappaB kinase/NF-kappaB sign…	GO:0005634~nucleus,GO:0005654~nucleoplasm,GO:0005737~cytoplasm,GO:0032996~Bcl3-Bcl10 complex,GO:0033257~Bcl3/NF-kappaB2 complex,GO:0045171~intercellular bridge,	GO:0003677~DNA binding,GO:0003700~transcription factor activity, sequence-specific DNA binding,	IPR002110:Ankyrin repeat,IPR020683:Ankyrin repeat-containing domain,	bta04668:TNF signaling pathway,		SM00248:ANK,	ANK repeat,Complete proteome,Reference proteome,
E1B8E6	B-cell CLL/lymphoma 6(BCL6)	Bos taurus		GO:0000060~protein import into nucleus, translocation,GO:0000122~negative regulation of transcription from RNA polymerase II promoter,GO:0000902~cell morphogenesis,GO:0001953~negative regulation of cell-matrix adhesion,GO:0002467~germinal center formation,GO:0002829~negative regulation of type 2 immune response,GO:0006974~cellular response to DNA damage stimulus,GO:0007266~Rho protein signal tran…	GO:0005634~nucleus,GO:0005657~replication fork,	GO:0000977~RNA polymerase II regulatory region sequence-specific DNA binding,GO:0001161~intronic transcription regulatory region sequence-specific DNA binding,GO:0001227~transcriptional repressor activity, RNA polymerase II transcription regulatory region sequence-specific binding,GO:0003677~DNA binding,GO:0003682~chromatin binding,GO:0031490~chromatin DNA binding,GO:0043565~sequence-specific DNA…	IPR000210:BTB/POZ-like,IPR007087:Zinc finger, C2H2,IPR011333:BTB/POZ fold,IPR013087:Zinc finger C2H2-type/integrase DNA-binding domain,IPR015880:Zinc finger, C2H2-like,	bta04068:FoxO signaling pathway,bta05202:Transcriptional misregulation in cancer,		SM00225:BTB,SM00355:ZnF_C2H2,	Complete proteome,Reference proteome,
Q32KL9	B-cell receptor associated protein 29(BCAP29)	Bos taurus		GO:0001649~osteoblast differentiation,GO:0006886~intracellular protein transport,GO:0006888~ER to Golgi vesicle-mediated transport,GO:0006915~apoptotic process,GO:0070973~protein localization to endoplasmic reticulum exit site,	GO:0005789~endoplasmic reticulum membrane,GO:0005887~integral component of plasma membrane,		IPR008417:B-cell receptor-associated 31-like,				Apoptosis,Coiled coil,Complete proteome,Endoplasmic reticulum,ER-Golgi transport,Membrane,Protein transport,Reference proteome,Transmembrane,Transmembrane helix,Transport,	chain:B-cell receptor-associated protein 29,short sequence motif:Di-lysine motif,topological domain:Cytoplasmic,topological domain:Lumenal,transmembrane region,
F1MM81	BAH domain and coiled-coil containing 1(BAHCC1)	Bos taurus		GO:0006342~chromatin silencing,GO:0031507~heterochromatin assembly,	GO:0000785~chromatin,GO:0005677~chromatin silencing complex,	GO:0000976~transcription regulatory region sequence-specific DNA binding,GO:0003682~chromatin binding,	IPR001025:Bromo adjacent homology (BAH) domain,			SM00439:BAH,	Coiled coil,Complete proteome,Reference proteome,
E1BFE9	BAI1 associated protein 2 like 2(BAIAP2L2)	Bos taurus		GO:0007009~plasma membrane organization,GO:0008286~insulin receptor signaling pathway,GO:0030838~positive regulation of actin filament polymerization,GO:0051017~actin filament bundle assembly,GO:0051764~actin crosslink formation,GO:2000251~positive regulation of actin cytoskeleton reorganization,	GO:0005829~cytosol,GO:0005886~plasma membrane,GO:0015629~actin cytoskeleton,GO:0030659~cytoplasmic vesicle membrane,GO:0044291~cell-cell contact zone,GO:0071439~clathrin complex,	GO:0005543~phospholipid binding,GO:0008093~cytoskeletal adaptor activity,	IPR001452:Src homology-3 domain,IPR013606:IRSp53/MIM homology domain (IMD),			SM00326:SH3,	Cell junction,Cell membrane,Complete proteome,Cytoplasmic vesicle,Lipid-binding,Membrane,Phosphoprotein,Reference proteome,SH3 domain,
F1MNU6	BAI1 associated protein 3(BAIAP3)	Bos taurus		GO:0007186~G-protein coupled receptor signaling pathway,			IPR000008:C2 calcium-dependent membrane targeting,IPR014770:Munc13 homology 1,IPR014772:Mammalian uncoordinated homology 13, domain 2,IPR019558:Mammalian uncoordinated homology 13, subgroup, domain 2,	bta05202:Transcriptional misregulation in cancer,		SM00239:C2,	Complete proteome,Reference proteome,
A6QLV7	BARX homeobox 2(BARX2)	Bos taurus		GO:0000122~negative regulation of transcription from RNA polymerase II promoter,GO:0001502~cartilage condensation,GO:0006355~regulation of transcription, DNA-templated,GO:0006357~regulation of transcription from RNA polymerase II promoter,GO:0014902~myotube differentiation,	GO:0005634~nucleus,GO:0005667~transcription factor complex,	GO:0000977~RNA polymerase II regulatory region sequence-specific DNA binding,GO:0001228~transcriptional activator activity, RNA polymerase II transcription regulatory region sequence-specific binding,GO:0003682~chromatin binding,GO:0043565~sequence-specific DNA binding,	IPR000047:Helix-turn-helix motif,IPR001356:Homeodomain,IPR009057:Homeodomain-like,IPR017970:Homeobox, conserved site,IPR020479:Homeodomain, metazoa,			SM00389:HOX,	Complete proteome,DNA-binding,Homeobox,Nucleus,Reference proteome,
F1MYS0	BBX, HMG-box containing(BBX)	Bos taurus		GO:0060348~bone development,	GO:0005654~nucleoplasm,GO:0005737~cytoplasm,		IPR009071:High mobility group (HMG) box domain,IPR019102:HMG box transcription factor BBX, domain of unknown function DUF2028,			SM00398:HMG,	Complete proteome,Reference proteome,
A6QQI6	BCAS3, microtubule associated cell migration factor(BCAS3)	Bos taurus		GO:0007030~Golgi organization,GO:0010595~positive regulation of endothelial cell migration,GO:0016192~vesicle-mediated transport,GO:0031023~microtubule organizing center organization,GO:0034260~negative regulation of GTPase activity,GO:0035148~tube formation,GO:0042594~response to starvation,GO:0045944~positive regulation of transcription from RNA polymerase II promoter,GO:0051491~positive regula…	GO:0005730~nucleolus,GO:0005737~cytoplasm,GO:0005881~cytoplasmic microtubule,GO:0031252~cell leading edge,GO:0035327~transcriptionally active chromatin,GO:0045111~intermediate filament cytoskeleton,GO:0071944~cell periphery,	GO:0003682~chromatin binding,GO:0010698~acetyltransferase activator activity,	IPR015943:WD40/YVTN repeat-like-containing domain,IPR017986:WD40-repeat-containing domain,IPR022175:Breast carcinoma amplified sequence 3,				Complete proteome,Reference proteome,
Q29S19	BCDIN3 domain containing RNA methyltransferase(BCDIN3D)	Bos taurus	Translation, ribosomal structure and biogenesis,	GO:0001510~RNA methylation,GO:0010586~miRNA metabolic process,GO:2000632~negative regulation of pre-miRNA processing,	GO:0005634~nucleus,GO:0005737~cytoplasm,	GO:0008171~O-methyltransferase activity,GO:0008173~RNA methyltransferase activity,	IPR010675:Bicoid-interacting 3,IPR024160:Bin3-type S-adenosyl-L-methionine binding domain,				Complete proteome,Cytoplasm,Methyltransferase,Reference proteome,S-adenosyl-L-methionine,Transferase,	chain:Probable methyltransferase BCDIN3D,domain:BIN3,
O02703	BCL2 associated X, apoptosis regulator(BAX)	Bos taurus		GO:0001541~ovarian follicle development,GO:0001764~neuron migration,GO:0001777~T cell homeostatic proliferation,GO:0001782~B cell homeostasis,GO:0001783~B cell apoptotic process,GO:0001822~kidney development,GO:0001836~release of cytochrome c from mitochondria,GO:0001844~protein insertion into mitochondrial membrane involved in apoptotic signaling pathway,GO:0001974~blood vessel remodeling,GO:000…	GO:0005634~nucleus,GO:0005635~nuclear envelope,GO:0005737~cytoplasm,GO:0005739~mitochondrion,GO:0005741~mitochondrial outer membrane,GO:0005757~mitochondrial permeability transition pore complex,GO:0005783~endoplasmic reticulum,GO:0005789~endoplasmic reticulum membrane,GO:0005829~cytosol,GO:0046930~pore complex,GO:0070062~extracellular exosome,GO:0097136~Bcl-2 family protein complex,GO:0097144~BA…	GO:0008289~lipid binding,GO:0015267~channel activity,GO:0030544~Hsp70 protein binding,GO:0042803~protein homodimerization activity,GO:0046982~protein heterodimerization activity,GO:0051087~chaperone binding,GO:0051434~BH3 domain binding,	IPR002475:Bcl2-like,IPR020717:Apoptosis regulator, Bcl-2, BH1 motif, conserved site,IPR020726:Apoptosis regulator, Bcl-2, BH2 motif, conserved site,IPR020728:Apoptosis regulator, Bcl-2, BH3 motif, conserved site,IPR026298:Blc2 family,IPR026304:Apoptosis regulator BAX,	bta04071:Sphingolipid signaling pathway,bta04115:p53 signaling pathway,bta04141:Protein processing in endoplasmic reticulum,bta04210:Apoptosis,bta04722:Neurotrophin signaling pathway,bta04932:Non-alcoholic fatty liver disease (NAFLD),bta05014:Amyotrophic lateral sclerosis (ALS),bta05016:Huntington's disease,bta05020:Prion diseases,bta05152:Tuberculosis,bta05161:Hepatitis B,bta05166:HTLV-I infecti…			Acetylation,Alternative splicing,Apoptosis,Complete proteome,Cytoplasm,Membrane,Mitochondrion,Reference proteome,Transmembrane,Transmembrane helix,	chain:Apoptosis regulator BAX,modified residue,short sequence motif:BH1,short sequence motif:BH2,short sequence motif:BH3,transmembrane region,
Q3ZBG5	BCL2 associated athanogene 2(BAG2)	Bos taurus		GO:0006457~protein folding,GO:0019538~protein metabolic process,		GO:0042802~identical protein binding,GO:0051087~chaperone binding,	IPR003103:BAG domain,	bta04141:Protein processing in endoplasmic reticulum,		SM00264:BAG,	Acetylation,Chaperone,Coiled coil,Complete proteome,Phosphoprotein,Reference proteome,	chain:BAG family molecular chaperone regulator 2,domain:BAG,modified residue,
Q2TA08	BCL2 associated athanogene 5(BAG5)	Bos taurus		GO:0007030~Golgi organization,GO:0010977~negative regulation of neuron projection development,GO:0031397~negative regulation of protein ubiquitination,GO:0032435~negative regulation of proteasomal ubiquitin-dependent protein catabolic process,GO:0090083~regulation of inclusion body assembly,GO:1902176~negative regulation of oxidative stress-induced intrinsic apoptotic signaling pathway,	GO:0005634~nucleus,GO:0005739~mitochondrion,GO:0005829~cytosol,GO:0016020~membrane,GO:0016234~inclusion body,GO:0048471~perinuclear region of cytoplasm,	GO:0019901~protein kinase binding,GO:0031625~ubiquitin protein ligase binding,GO:0051087~chaperone binding,	IPR003103:BAG domain,			SM00264:BAG,	Chaperone,Complete proteome,Reference proteome,Repeat,	chain:BAG family molecular chaperone regulator 5,domain:BAG 1,domain:BAG 2,domain:BAG 3,domain:BAG 4,modified residue,
F1MY28	BCL2 associated athanogene 6(BAG6)	Bos taurus		GO:0001822~kidney development,GO:0006511~ubiquitin-dependent protein catabolic process,GO:0007130~synaptonemal complex assembly,GO:0007283~spermatogenesis,GO:0007420~brain development,GO:0009790~embryo development,GO:0018393~internal peptidyl-lysine acetylation,GO:0030324~lung development,GO:0032435~negative regulation of proteasomal ubiquitin-dependent protein catabolic process,GO:0042771~intrin…	GO:0005654~nucleoplasm,GO:0016020~membrane,GO:0071818~BAT3 complex,	GO:0043022~ribosome binding,	IPR000626:Ubiquitin,IPR019954:Ubiquitin conserved site,IPR021925:Protein of unknown function DUF3538,			SM00213:UBQ,	Complete proteome,Reference proteome,
A5D7B8	BCL2 associated transcription factor 1(BCLAF1)	Bos taurus		GO:0006915~apoptotic process,GO:0043620~regulation of DNA-templated transcription in response to stress,GO:0045892~negative regulation of transcription, DNA-templated,GO:2000144~positive regulation of DNA-templated transcription, initiation,GO:2001022~positive regulation of response to DNA damage stimulus,GO:2001244~positive regulation of intrinsic apoptotic signaling pathway,	GO:0005634~nucleus,GO:0005730~nucleolus,GO:0016607~nuclear speck,	GO:0003677~DNA binding,GO:0044822~poly(A) RNA binding,	IPR026668:Bcl-2-associated transcription factor 1,				Coiled coil,Complete proteome,Reference proteome,
F1N353	BCL2 interacting protein 1(BNIP1)	Bos taurus		GO:0006915~apoptotic process,GO:0007029~endoplasmic reticulum organization,GO:0016320~endoplasmic reticulum membrane fusion,	GO:0005635~nuclear envelope,GO:0005783~endoplasmic reticulum,GO:0016021~integral component of membrane,GO:0031201~SNARE complex,		IPR005606:Sec20,	bta04130:SNARE interactions in vesicular transport,			Coiled coil,Complete proteome,Membrane,Reference proteome,Transmembrane,Transmembrane helix,
F1N6R4	BCL2 interacting protein 2(BNIP2)	Bos taurus		GO:0001824~blastocyst development,GO:0006915~apoptotic process,GO:0043410~positive regulation of MAPK cascade,GO:0045666~positive regulation of neuron differentiation,GO:0051057~positive regulation of small GTPase mediated signal transduction,GO:0051146~striated muscle cell differentiation,GO:0051297~centrosome organization,	GO:0005814~centriole,GO:0005829~cytosol,GO:0031616~spindle pole centrosome,	GO:0042802~identical protein binding,	IPR001251:CRAL-TRIO domain,IPR022181:Bcl2-/adenovirus E1B 19kDa-interacting protein 2,			SM00516:SEC14,	Complete proteome,Reference proteome,
Q462R5	BCL2 like 1(BCL2L1)	Bos taurus		GO:0000910~cytokinesis,GO:0001541~ovarian follicle development,GO:0001701~in utero embryonic development,GO:0001836~release of cytochrome c from mitochondria,GO:0007093~mitotic cell cycle checkpoint,GO:0007281~germ cell development,GO:0007283~spermatogenesis,GO:0008283~cell proliferation,GO:0008284~positive regulation of cell proliferation,GO:0008584~male gonad development,GO:0008630~intrinsic ap…	GO:0005741~mitochondrial outer membrane,GO:0005813~centrosome,GO:0005829~cytosol,GO:0016021~integral component of membrane,GO:0097136~Bcl-2 family protein complex,	GO:0042803~protein homodimerization activity,GO:0046982~protein heterodimerization activity,	IPR002475:Bcl2-like,IPR003093:Apoptosis regulator, Bcl-2 protein, BH4,IPR004725:Apoptosis regulator, Bcl-2/ BclX,IPR013279:Apoptosis regulator, Bcl-X,IPR020717:Apoptosis regulator, Bcl-2, BH1 motif, conserved site,IPR020726:Apoptosis regulator, Bcl-2, BH2 motif, conserved site,IPR020728:Apoptosis regulator, Bcl-2, BH3 motif, conserved site,IPR020731:Apoptosis regulator, Bcl-2, BH4 motif, conserve…	bta04014:Ras signaling pathway,bta04064:NF-kappa B signaling pathway,bta04151:PI3K-Akt signaling pathway,bta04210:Apoptosis,bta04630:Jak-STAT signaling pathway,bta05014:Amyotrophic lateral sclerosis (ALS),bta05145:Toxoplasmosis,bta05166:HTLV-I infection,bta05200:Pathways in cancer,bta05202:Transcriptional misregulation in cancer,bta05212:Pancreatic cancer,bta05220:Chronic myeloid leukemia,bta0522…		SM00265:BH4,	Complete proteome,Membrane,Reference proteome,Transmembrane,Transmembrane helix,
E1B9B3	BCL2 like 10(BCL2L10)	Bos taurus		GO:0008630~intrinsic apoptotic signaling pathway in response to DNA damage,GO:0097192~extrinsic apoptotic signaling pathway in absence of ligand,GO:2001243~negative regulation of intrinsic apoptotic signaling pathway,	GO:0005741~mitochondrial outer membrane,GO:0016021~integral component of membrane,	GO:0042803~protein homodimerization activity,GO:0046982~protein heterodimerization activity,	IPR002475:Bcl2-like,IPR020726:Apoptosis regulator, Bcl-2, BH2 motif, conserved site,IPR026298:Blc2 family,				Complete proteome,Membrane,Reference proteome,Transmembrane,Transmembrane helix,
G3X8E4	BCL6 corepressor(BCOR)	Bos taurus		GO:0000122~negative regulation of transcription from RNA polymerase II promoter,GO:0000415~negative regulation of histone H3-K36 methylation,GO:0007507~heart development,GO:0030502~negative regulation of bone mineralization,GO:0035518~histone H2A monoubiquitination,GO:0042476~odontogenesis,GO:0051572~negative regulation of histone H3-K4 methylation,GO:0060021~palate development,GO:0065001~specifi…	GO:0005739~mitochondrion,GO:0031519~PcG protein complex,	GO:0003714~transcription corepressor activity,GO:0004842~ubiquitin-protein transferase activity,GO:0044212~transcription regulatory region DNA binding,	IPR002110:Ankyrin repeat,IPR020683:Ankyrin repeat-containing domain,			SM00248:ANK,	ANK repeat,Complete proteome,Reference proteome,
F1MML3	BCL6 corepressor-like 1(BCORL1)	Bos taurus			GO:0005654~nucleoplasm,GO:0005737~cytoplasm,GO:0005886~plasma membrane,		IPR002110:Ankyrin repeat,IPR020683:Ankyrin repeat-containing domain,			SM00248:ANK,	ANK repeat,Complete proteome,Reference proteome,
Q5E9H5	BCS1-like (S. cerevisiae)(BCS1L)	Bos taurus		GO:0032981~mitochondrial respiratory chain complex I assembly,GO:0033617~mitochondrial respiratory chain complex IV assembly,GO:0034551~mitochondrial respiratory chain complex III assembly,	GO:0005743~mitochondrial inner membrane,GO:0016021~integral component of membrane,	GO:0005524~ATP binding,	IPR003593:AAA+ ATPase domain,IPR003959:ATPase, AAA-type, core,IPR003960:ATPase, AAA-type, conserved site,IPR014851:BCS1, N-terminal,IPR027243:Mitochondrial chaperone BCS1,IPR027417:P-loop containing nucleoside triphosphate hydrolase,			SM00382:AAA,SM01024:SM01024,	ATP-binding,Chaperone,Complete proteome,Membrane,Mitochondrion,Mitochondrion inner membrane,Nucleotide-binding,Phosphoprotein,Reference proteome,Transmembrane,Transmembrane helix,	chain:Mitochondrial chaperone BCS1,modified residue,nucleotide phosphate-binding region:ATP,topological domain:Mitochondrial intermembrane,topological domain:Mitochondrial matrix,transmembrane region,
E1BHG2	BEN domain containing 3(BEND3)	Bos taurus		GO:0000122~negative regulation of transcription from RNA polymerase II promoter,GO:0000183~chromatin silencing at rDNA,GO:0006306~DNA methylation,GO:0034773~histone H4-K20 trimethylation,GO:0036124~histone H3-K9 trimethylation,GO:0043967~histone H4 acetylation,GO:0080182~histone H3-K4 trimethylation,GO:0098532~histone H3-K27 trimethylation,	GO:0005720~nuclear heterochromatin,GO:0005730~nucleolus,	GO:0000182~rDNA binding,	IPR018379:BEN domain,			SM01025:SM01025,	Complete proteome,Reference proteome,
G3N061	BICD cargo adaptor 1(BICD1)	Bos taurus		GO:0006810~transport,GO:0016032~viral process,GO:0033365~protein localization to organelle,GO:0034063~stress granule assembly,GO:0048260~positive regulation of receptor-mediated endocytosis,GO:0072385~minus-end-directed organelle transport along microtubule,GO:0072393~microtubule anchoring at microtubule organizing center,GO:1900275~negative regulation of phospholipase C activity,GO:1900276~regul…	GO:0005794~Golgi apparatus,GO:0005802~trans-Golgi network,GO:0005829~cytosol,GO:0005881~cytoplasmic microtubule,GO:0016020~membrane,GO:0031410~cytoplasmic vesicle,GO:0048471~perinuclear region of cytoplasm,GO:0072517~host cell viral assembly compartment,		IPR018477:Bicaudal-D protein, microtubule-associated,				Coiled coil,Complete proteome,Reference proteome,
G3N3P0	BICD cargo adaptor 2(BICD2)	Bos taurus		GO:0072385~minus-end-directed organelle transport along microtubule,GO:0072393~microtubule anchoring at microtubule organizing center,	GO:0005794~Golgi apparatus,GO:0005886~plasma membrane,GO:0031410~cytoplasmic vesicle,		IPR018477:Bicaudal-D protein, microtubule-associated,				Coiled coil,Complete proteome,Reference proteome,
E1BM24	BICD family like cargo adaptor 2(BICDL2)	Bos taurus									Coiled coil,Complete proteome,Reference proteome,
Q3SX20	BLOC-1 related complex subunit 6(BORCS6)	Bos taurus		GO:0032418~lysosome localization,	GO:0005765~lysosomal membrane,GO:0043234~protein complex,		IPR019314:Protein of unknown function DUF2365,				Complete proteome,Lysosome,Membrane,Phosphoprotein,Reference proteome,	chain:Uncharacterized protein C17orf59 homolog,compositionally biased region:Pro-rich,modified residue,
Q5E9L2	BMP/retinoic acid inducible neural specific 1(BRINP1)	Bos taurus		GO:0001662~behavioral fear response,GO:0007050~cell cycle arrest,GO:0008219~cell death,GO:0035176~social behavior,GO:0045666~positive regulation of neuron differentiation,GO:0045786~negative regulation of cell cycle,GO:0045930~negative regulation of mitotic cell cycle,GO:0050768~negative regulation of neurogenesis,GO:0071300~cellular response to retinoic acid,	GO:0005737~cytoplasm,GO:0005783~endoplasmic reticulum,GO:0030425~dendrite,GO:0043025~neuronal cell body,		IPR020864:Membrane attack complex component/perforin (MACPF) domain,			SM00457:MACPF,	Cell cycle,Complete proteome,Cytoplasm,Glycoprotein,Growth arrest,Reference proteome,Signal,	chain:Deleted in bladder cancer protein 1 homolog,domain:MACPF,glycosylation site:N-linked (GlcNAc...),signal peptide,
E1B9Z7	BMP/retinoic acid inducible neural specific 2(BRINP2)	Bos taurus		GO:0045666~positive regulation of neuron differentiation,GO:0045930~negative regulation of mitotic cell cycle,GO:0071300~cellular response to retinoic acid,	GO:0005783~endoplasmic reticulum,GO:0030425~dendrite,GO:0043025~neuronal cell body,		IPR020864:Membrane attack complex component/perforin (MACPF) domain,			SM00457:MACPF,	Complete proteome,Reference proteome,
A7MB29	BMP/retinoic acid inducible neural specific 3(BRINP3)	Bos taurus		GO:0045666~positive regulation of neuron differentiation,GO:0045930~negative regulation of mitotic cell cycle,GO:0071300~cellular response to retinoic acid,	GO:0005783~endoplasmic reticulum,GO:0030425~dendrite,GO:0043025~neuronal cell body,		IPR009030:Insulin-like growth factor binding protein, N-terminal,IPR020864:Membrane attack complex component/perforin (MACPF) domain,			SM00457:MACPF,	Complete proteome,Reference proteome,Signal,
E1BPP2	BMS1, ribosome biogenesis factor(BMS1)	Bos taurus		GO:0000462~maturation of SSU-rRNA from tricistronic rRNA transcript (SSU-rRNA, 5.8S rRNA, LSU-rRNA),GO:0000479~endonucleolytic cleavage of tricistronic rRNA transcript (SSU-rRNA, 5.8S rRNA, LSU-rRNA),	GO:0005730~nucleolus,GO:0030686~90S preribosome,	GO:0003924~GTPase activity,GO:0005525~GTP binding,GO:0034511~U3 snoRNA binding,GO:0044822~poly(A) RNA binding,	IPR007034:Ribosome biogenesis protein BMS1/TSR1, C-terminal,IPR012948:AARP2CN,IPR027417:P-loop containing nucleoside triphosphate hydrolase,	bta03008:Ribosome biogenesis in eukaryotes,		SM00785:AARP2CN,SM01362:SM01362,	Complete proteome,Reference proteome,
G3X680	BMX non-receptor tyrosine kinase(BMX)	Bos taurus		GO:0001865~NK T cell differentiation,GO:0007169~transmembrane receptor protein tyrosine kinase signaling pathway,GO:0035556~intracellular signal transduction,GO:0038083~peptidyl-tyrosine autophosphorylation,GO:0042127~regulation of cell proliferation,GO:0045087~innate immune response,	GO:0031234~extrinsic component of cytoplasmic side of plasma membrane,GO:0032587~ruffle membrane,	GO:0004715~non-membrane spanning protein tyrosine kinase activity,GO:0005524~ATP binding,	IPR000719:Protein kinase, catalytic domain,IPR000980:SH2 domain,IPR001245:Serine-threonine/tyrosine-protein kinase catalytic domain,IPR001562:Zinc finger, Btk motif,IPR001849:Pleckstrin homology domain,IPR008266:Tyrosine-protein kinase, active site,IPR011009:Protein kinase-like domain,IPR011993:Pleckstrin homology-like domain,IPR017441:Protein kinase, ATP binding site,IPR020635:Tyrosine-protein k…			SM00107:BTK,SM00219:TyrKc,SM00233:PH,SM00252:SH2,	ATP-binding,Complete proteome,Kinase,Nucleotide-binding,Reference proteome,Transferase,Tyrosine-protein kinase,
E1BB93	BOC cell adhesion associated, oncogene regulated(BOC)	Bos taurus		GO:0007224~smoothened signaling pathway,GO:0007411~axon guidance,GO:0045663~positive regulation of myoblast differentiation,GO:0098779~mitophagy in response to mitochondrial depolarization,	GO:0005887~integral component of plasma membrane,		IPR003598:Immunoglobulin subtype 2,IPR003599:Immunoglobulin subtype,IPR003961:Fibronectin, type III,IPR007110:Immunoglobulin-like domain,IPR013098:Immunoglobulin I-set,IPR013151:Immunoglobulin,IPR013783:Immunoglobulin-like fold,			SM00060:FN3,SM00408:IGc2,SM00409:IG,	Complete proteome,Immunoglobulin domain,Membrane,Reference proteome,Repeat,Signal,Transmembrane,Transmembrane helix,
A6H6W7	BOK, BCL2 family apoptosis regulator(BOK)	Bos taurus		GO:0006919~activation of cysteine-type endopeptidase activity involved in apoptotic process,GO:0008283~cell proliferation,GO:0008630~intrinsic apoptotic signaling pathway in response to DNA damage,GO:0051402~neuron apoptotic process,GO:0072332~intrinsic apoptotic signaling pathway by p53 class mediator,GO:0097192~extrinsic apoptotic signaling pathway in absence of ligand,GO:1900119~positive regul…	GO:0005634~nucleus,GO:0005741~mitochondrial outer membrane,	GO:0042803~protein homodimerization activity,GO:0046982~protein heterodimerization activity,	IPR002475:Bcl2-like,IPR026298:Blc2 family,IPR026309:Bcl-2-related ovarian killer protein,				Complete proteome,Reference proteome,
L8IG95	BPI fold containing family A member 3(BPIFA3)	Bos mutus				GO:0008289~lipid binding,	IPR017942:Lipid-binding serum glycoprotein, N-terminal,IPR017943:Bactericidal permeability-increasing protein, alpha/beta domain,				Signal,
F1MLW2	BPI fold containing family B member 1(BPIFB1)	Bos taurus		GO:0002227~innate immune response in mucosa,GO:0034144~negative regulation of toll-like receptor 4 signaling pathway,GO:0045087~innate immune response,	GO:0005615~extracellular space,GO:0070062~extracellular exosome,	GO:0008289~lipid binding,	IPR001124:Lipid-binding serum glycoprotein, C-terminal,IPR017942:Lipid-binding serum glycoprotein, N-terminal,IPR017943:Bactericidal permeability-increasing protein, alpha/beta domain,IPR021193:PLUNC, long form,		PIRSF037186:PLUNC, long form,	SM00328:BPI1,	Complete proteome,Disulfide bond,Glycoprotein,Immunity,Innate immunity,Reference proteome,Secreted,Signal,	chain:Long palate, lung and nasal epithelium carcinoma-associated protein 1,glycosylation site:N-linked (GlcNAc...),sequence conflict,signal peptide,
F1MJS1	BPI fold containing family B member 6(BPIFB6)	Bos taurus				GO:0008289~lipid binding,	IPR001124:Lipid-binding serum glycoprotein, C-terminal,IPR017942:Lipid-binding serum glycoprotein, N-terminal,IPR017943:Bactericidal permeability-increasing protein, alpha/beta domain,			SM00329:BPI2,	Complete proteome,Reference proteome,Signal,
F1MVZ2	BR serine/threonine kinase 2(BRSK2)	Bos taurus		GO:0000086~G2/M transition of mitotic cell cycle,GO:0006468~protein phosphorylation,GO:0007409~axonogenesis,GO:0018105~peptidyl-serine phosphorylation,GO:0030010~establishment of cell polarity,GO:0031532~actin cytoskeleton reorganization,GO:0035556~intracellular signal transduction,GO:0036503~ERAD pathway,GO:0061178~regulation of insulin secretion involved in cellular response to glucose stimulus…	GO:0005634~nucleus,GO:0005737~cytoplasm,GO:0005783~endoplasmic reticulum,GO:0005813~centrosome,	GO:0000287~magnesium ion binding,GO:0004674~protein serine/threonine kinase activity,GO:0005524~ATP binding,GO:0050321~tau-protein kinase activity,	IPR000719:Protein kinase, catalytic domain,IPR008271:Serine/threonine-protein kinase, active site,IPR011009:Protein kinase-like domain,			SM00220:S_TKc,	Complete proteome,Reference proteome,
F1MAV4	BRCA1 associated RING domain 1(BARD1)	Bos taurus		GO:0016567~protein ubiquitination,GO:0042325~regulation of phosphorylation,GO:0043065~positive regulation of apoptotic process,GO:0043066~negative regulation of apoptotic process,GO:0046826~negative regulation of protein export from nucleus,GO:0085020~protein K6-linked ubiquitination,	GO:0005654~nucleoplasm,GO:0005737~cytoplasm,GO:0031436~BRCA1-BARD1 complex,GO:0070531~BRCA1-A complex,	GO:0003723~RNA binding,GO:0004842~ubiquitin-protein transferase activity,GO:0008270~zinc ion binding,	IPR001357:BRCT domain,IPR001841:Zinc finger, RING-type,IPR002110:Ankyrin repeat,IPR013083:Zinc finger, RING/FYVE/PHD-type,IPR017907:Zinc finger, RING-type, conserved site,IPR020683:Ankyrin repeat-containing domain,			SM00248:ANK,SM00292:BRCT,	ANK repeat,Complete proteome,Reference proteome,
F1MMS0	BRCA1 interacting protein C-terminal helicase 1(BRIP1)	Bos taurus		GO:0006139~nucleobase-containing compound metabolic process,GO:0006357~regulation of transcription from RNA polymerase II promoter,	GO:0005634~nucleus,GO:0005737~cytoplasm,GO:0031965~nuclear membrane,	GO:0003677~DNA binding,GO:0004003~ATP-dependent DNA helicase activity,GO:0005524~ATP binding,	IPR006554:Helicase-like, DEXD box c2 type,IPR006555:ATP-dependent helicase, C-terminal,IPR010614:DEAD2,IPR013020:DNA helicase (DNA repair), Rad3 type,IPR014013:Helicase, superfamily 1/2, ATP-binding domain, DinG/Rad3-type,IPR027417:P-loop containing nucleoside triphosphate hydrolase,	bta03460:Fanconi anemia pathway,		SM00488:DEXDc2,SM00491:HELICc2,	ATP-binding,Complete proteome,Helicase,Hydrolase,Nucleotide-binding,Nucleus,Reference proteome,
Q864U1	BRCA1, DNA repair associated(BRCA1)	Bos taurus		GO:0000724~double-strand break repair via homologous recombination,GO:0006260~DNA replication,GO:0006281~DNA repair,GO:0006301~postreplication repair,GO:0006349~regulation of gene expression by genetic imprinting,GO:0006351~transcription, DNA-templated,GO:0006633~fatty acid biosynthetic process,GO:0007049~cell cycle,GO:0007059~chromosome segregation,GO:0007098~centrosome cycle,GO:0008630~intrinsi…	GO:0000794~condensed nuclear chromosome,GO:0005634~nucleus,GO:0005694~chromosome,GO:0005737~cytoplasm,GO:0005886~plasma membrane,GO:0030529~intracellular ribonucleoprotein complex,GO:0031436~BRCA1-BARD1 complex,GO:0070531~BRCA1-A complex,	GO:0003677~DNA binding,GO:0003684~damaged DNA binding,GO:0003723~RNA binding,GO:0004842~ubiquitin-protein transferase activity,GO:0008270~zinc ion binding,GO:0016874~ligase activity,GO:0044212~transcription regulatory region DNA binding,	IPR001357:BRCT domain,IPR001841:Zinc finger, RING-type,IPR011364:Breast cancer type 1 susceptibility protein (BRCA1),IPR013083:Zinc finger, RING/FYVE/PHD-type,IPR017907:Zinc finger, RING-type, conserved site,IPR018957:Zinc finger, C3HC4 RING-type,IPR025994:BRCA1, serine-rich domain,	bta03460:Fanconi anemia pathway,bta04120:Ubiquitin mediated proteolysis,bta04151:PI3K-Akt signaling pathway,bta05206:MicroRNAs in cancer,	PIRSF001734:transcriptional regulator, BRCA1 type,	SM00184:RING,SM00292:BRCT,	Acetylation,Activator,Cell cycle,Chromosome,Coiled coil,Complete proteome,Cytoplasm,DNA damage,DNA recombination,DNA repair,DNA-binding,Fatty acid biosynthesis,Fatty acid metabolism,Isopeptide bond,Ligase,Lipid biosynthesis,Lipid metabolism,Metal-binding,Nucleus,Phosphoprotein,Reference proteome,Repeat,Transcription,Transcription regulation,Transferase,Tumor suppressor,Ubl conjugation,Ubl conjuga…	chain:Breast cancer type 1 susceptibility protein homolog,domain:BRCT 1,domain:BRCT 2,modified residue,zinc finger region:RING-type,
Q2NL37	BRCA2 and CDKN1A interacting protein(BCCIP)	Bos taurus		GO:0000079~regulation of cyclin-dependent protein serine/threonine kinase activity,GO:0006281~DNA repair,GO:0007049~cell cycle,GO:0061101~neuroendocrine cell differentiation,	GO:0019908~nuclear cyclin-dependent protein kinase holoenzyme complex,	GO:0019207~kinase regulator activity,GO:0044822~poly(A) RNA binding,	IPR025602:BCP1 family,		PIRSF028983:protein BCP1,		Cell cycle,Complete proteome,DNA damage,DNA repair,Nucleus,Phosphoprotein,Reference proteome,	chain:BRCA2 and CDKN1A-interacting protein,modified residue,region of interest:Interaction with BRCA2,region of interest:Interaction with CDKN1A,
E1B8X8	BRCA2, DNA repair associated(BRCA2)	Bos taurus		GO:0000722~telomere maintenance via recombination,GO:0000724~double-strand break repair via homologous recombination,GO:0000910~cytokinesis,GO:0001556~oocyte maturation,GO:0001833~inner cell mass cell proliferation,GO:0006289~nucleotide-excision repair,GO:0006355~regulation of transcription, DNA-templated,GO:0006978~DNA damage response, signal transduction by p53 class mediator resulting in trans…	GO:0000784~nuclear chromosome, telomeric region,GO:0005634~nucleus,GO:0005654~nucleoplasm,GO:0005813~centrosome,GO:0030141~secretory granule,GO:0033593~BRCA2-MAGE-D1 complex,	GO:0003697~single-stranded DNA binding,GO:0010484~H3 histone acetyltransferase activity,GO:0010485~H4 histone acetyltransferase activity,GO:0043015~gamma-tubulin binding,	IPR002093:BRCA2 repeat,IPR012340:Nucleic acid-binding, OB-fold,IPR015187:BRCA2, oligonucleotide/oligosaccharide-binding 1,IPR015188:BRCA2, oligonucleotide/oligosaccharide-binding 3,IPR015205:Tower,IPR015252:DNA recombination/repair protein BRCA2, helical domain,IPR015525:Breast cancer type 2 susceptibility protein,	bta03440:Homologous recombination,bta03460:Fanconi anemia pathway,bta05200:Pathways in cancer,bta05212:Pancreatic cancer,	PIRSF002397:DNA recombination repair protein, BRCA2 type,	SM01341:SM01341,	Complete proteome,Reference proteome,
Q29S07	BRF2, RNA polymerase III transcription initiation factor 50 kDa subunit(BRF2)	Bos taurus	Transcription,	GO:0006352~DNA-templated transcription, initiation,GO:0006355~regulation of transcription, DNA-templated,GO:0006359~regulation of transcription from RNA polymerase III promoter,GO:0034599~cellular response to oxidative stress,	GO:0005634~nucleus,	GO:0001007~transcription factor activity, RNA polymerase III transcription factor binding,GO:0001032~RNA polymerase III type 3 promoter DNA binding,GO:0008270~zinc ion binding,	IPR000812:Transcription factor TFIIB,IPR013137:Zinc finger, TFIIB-type,IPR013763:Cyclin-like,				Activator,Complete proteome,Metal-binding,Nucleus,Phosphoprotein,Reference proteome,Repeat,Transcription,Transcription regulation,Zinc,Zinc-finger,	chain:Transcription factor IIIB 50 kDa subunit,metal ion-binding site:Zinc,repeat:1,repeat:2,sequence conflict,zinc finger region:TFIIB-type,
G3MY22	BRICHOS domain containing 5(BRICD5)	Bos taurus		GO:0042127~regulation of cell proliferation,	GO:0005615~extracellular space,GO:0016021~integral component of membrane,		IPR007084:BRICHOS domain,			SM01039:SM01039,	Complete proteome,Membrane,Reference proteome,Transmembrane,Transmembrane helix,
L8I390	BRO1 domain and CAAX motif containing(BROX)	Bos mutus					IPR004328:BRO1 domain,			SM01041:SM01041,
Q3SZZ0	BRX1, biogenesis of ribosomes(BRIX1)	Bos taurus		GO:0000027~ribosomal large subunit assembly,	GO:0005730~nucleolus,	GO:0003723~RNA binding,GO:0044822~poly(A) RNA binding,	IPR004154:Anticodon-binding,IPR007109:Brix domain,IPR026532:Ribosome biogenesis protein BRX1,			SM00879:SM00879,	Acetylation,Complete proteome,Isopeptide bond,Nucleus,Phosphoprotein,Reference proteome,Ribosome biogenesis,Ubl conjugation,	chain:Brix domain-containing protein 2,domain:Brix,modified residue,
Q3SX22	BSD domain containing 1(BSDC1)	Bos taurus					IPR005607:BSD,			SM00751:BSD,	Complete proteome,Phosphoprotein,Reference proteome,	chain:BSD domain-containing protein 1,domain:BSD,
F1MRM6	BTB (POZ) domain containing 8(BTBD8)	Bos taurus					IPR000210:BTB/POZ-like,IPR011333:BTB/POZ fold,			SM00225:BTB,	Complete proteome,Reference proteome,
E1BJL3	BTB domain and CNC homolog 1(BACH1)	Bos taurus		GO:0000083~regulation of transcription involved in G1/S transition of mitotic cell cycle,GO:0000117~regulation of transcription involved in G2/M transition of mitotic cell cycle,GO:0006281~DNA repair,GO:0006355~regulation of transcription, DNA-templated,GO:0006366~transcription from RNA polymerase II promoter,GO:0016567~protein ubiquitination,GO:0061418~regulation of transcription from RNA polyme…	GO:0005634~nucleus,GO:0005829~cytosol,GO:0031463~Cul3-RING ubiquitin ligase complex,	GO:0000980~RNA polymerase II distal enhancer sequence-specific DNA binding,GO:0001078~transcriptional repressor activity, RNA polymerase II core promoter proximal region sequence-specific binding,GO:0001205~transcriptional activator activity, RNA polymerase II distal enhancer sequence-specific binding,GO:0001206~transcriptional repressor activity, RNA polymerase II distal enhancer sequence-specif…	IPR000210:BTB/POZ-like,IPR004826:Basic leucine zipper domain, Maf-type,IPR004827:Basic-leucine zipper domain,IPR008917:Eukaryotic transcription factor, Skn-1-like, DNA-binding,IPR011333:BTB/POZ fold,			SM00225:BTB,SM00338:BRLZ,	Coiled coil,Complete proteome,DNA-binding,Reference proteome,Transcription,Transcription regulation,
E1BIQ6	BTB domain and CNC homolog 2(BACH2)	Bos taurus		GO:0006366~transcription from RNA polymerase II promoter,GO:0016567~protein ubiquitination,	GO:0005634~nucleus,GO:0031463~Cul3-RING ubiquitin ligase complex,	GO:0000980~RNA polymerase II distal enhancer sequence-specific DNA binding,GO:0001206~transcriptional repressor activity, RNA polymerase II distal enhancer sequence-specific binding,GO:0003700~transcription factor activity, sequence-specific DNA binding,	IPR000210:BTB/POZ-like,IPR004826:Basic leucine zipper domain, Maf-type,IPR004827:Basic-leucine zipper domain,IPR008917:Eukaryotic transcription factor, Skn-1-like, DNA-binding,IPR011333:BTB/POZ fold,			SM00225:BTB,SM00338:BRLZ,	Complete proteome,DNA-binding,Reference proteome,Transcription,Transcription regulation,
A5D7V6	BTB domain containing 1(BTBD1)	Bos taurus		GO:0030162~regulation of proteolysis,GO:0042787~protein ubiquitination involved in ubiquitin-dependent protein catabolic process,GO:0043161~proteasome-mediated ubiquitin-dependent protein catabolic process,	GO:0000932~cytoplasmic mRNA processing body,GO:0019005~SCF ubiquitin ligase complex,	GO:0031625~ubiquitin protein ligase binding,	IPR000210:BTB/POZ-like,IPR011333:BTB/POZ fold,IPR011705:BTB/Kelch-associated,IPR012983:PHR,			SM00225:BTB,SM00875:SM00875,	Complete proteome,Reference proteome,
L8J4S0	BTB domain containing 10(BTBD10)	Bos mutus					IPR000210:BTB/POZ-like,IPR011333:BTB/POZ fold,			SM00225:BTB,
E1BJI4	BTB domain containing 11(BTBD11)	Bos taurus		GO:0030162~regulation of proteolysis,GO:0042787~protein ubiquitination involved in ubiquitin-dependent protein catabolic process,GO:0043161~proteasome-mediated ubiquitin-dependent protein catabolic process,GO:0060395~SMAD protein signal transduction,	GO:0005737~cytoplasm,GO:0019005~SCF ubiquitin ligase complex,	GO:0031625~ubiquitin protein ligase binding,	IPR000210:BTB/POZ-like,IPR002110:Ankyrin repeat,IPR009072:Histone-fold,IPR011333:BTB/POZ fold,IPR020683:Ankyrin repeat-containing domain,			SM00225:BTB,SM00248:ANK,	ANK repeat,Complete proteome,Reference proteome,
Q32L18	BTB domain containing 16(BTBD16)	Bos taurus			GO:0000151~ubiquitin ligase complex,GO:0005634~nucleus,		IPR011333:BTB/POZ fold,				Complete proteome,Reference proteome,	chain:BTB/POZ domain-containing protein 16,domain:BTB,
F1MQ38	BTB domain containing 3(BTBD3)	Bos taurus		GO:0021987~cerebral cortex development,GO:0030162~regulation of proteolysis,GO:0042787~protein ubiquitination involved in ubiquitin-dependent protein catabolic process,GO:0043161~proteasome-mediated ubiquitin-dependent protein catabolic process,GO:0048813~dendrite morphogenesis,	GO:0005634~nucleus,GO:0005829~cytosol,GO:0019005~SCF ubiquitin ligase complex,	GO:0031625~ubiquitin protein ligase binding,	IPR000210:BTB/POZ-like,IPR011333:BTB/POZ fold,IPR011705:BTB/Kelch-associated,IPR012983:PHR,			SM00225:BTB,SM00875:SM00875,	Complete proteome,Reference proteome,
P53348	BTG anti-proliferation factor 1(BTG1)	Bos taurus		GO:0006479~protein methylation,GO:0008285~negative regulation of cell proliferation,GO:0045603~positive regulation of endothelial cell differentiation,GO:0045663~positive regulation of myoblast differentiation,GO:0045766~positive regulation of angiogenesis,GO:2000271~positive regulation of fibroblast apoptotic process,	GO:0005634~nucleus,GO:0005737~cytoplasm,	GO:0019899~enzyme binding,	IPR002087:Anti-proliferative protein,	bta03018:RNA degradation,		SM00099:btg1,	Complete proteome,Phosphoprotein,Reference proteome,	chain:Protein BTG1,
F1MWP1	BUB1 mitotic checkpoint serine/threonine kinase B(BUB1B)	Bos taurus		GO:0007091~metaphase/anaphase transition of mitotic cell cycle,GO:0007094~mitotic spindle assembly checkpoint,GO:0034501~protein localization to kinetochore,	GO:0000778~condensed nuclear chromosome kinetochore,GO:0000940~condensed chromosome outer kinetochore,GO:0048471~perinuclear region of cytoplasm,	GO:0004672~protein kinase activity,GO:0005524~ATP binding,	IPR000719:Protein kinase, catalytic domain,IPR011009:Protein kinase-like domain,IPR013212:Mad3/BUB1 homology region 1,IPR015661:Mitotic checkpoint serine/threonine protein kinase Bub1/Mitotic spindle checkpoint component Mad3,	bta04110:Cell cycle,bta05166:HTLV-I infection,		SM00777:Mad3_BUB1_I,	Coiled coil,Complete proteome,Reference proteome,
A6QLW0	BUB1 mitotic checkpoint serine/threonine kinase(BUB1)	Bos taurus		GO:0007063~regulation of sister chromatid cohesion,GO:0007094~mitotic spindle assembly checkpoint,	GO:0000942~condensed nuclear chromosome outer kinetochore,GO:0005654~nucleoplasm,GO:0005737~cytoplasm,GO:0016020~membrane,	GO:0004672~protein kinase activity,GO:0005524~ATP binding,	IPR000719:Protein kinase, catalytic domain,IPR008271:Serine/threonine-protein kinase, active site,IPR011009:Protein kinase-like domain,IPR013212:Mad3/BUB1 homology region 1,IPR015661:Mitotic checkpoint serine/threonine protein kinase Bub1/Mitotic spindle checkpoint component Mad3,IPR017441:Protein kinase, ATP binding site,	bta04110:Cell cycle,bta04114:Oocyte meiosis,bta04914:Progesterone-mediated oocyte maturation,		SM00220:S_TKc,SM00777:Mad3_BUB1_I,	Complete proteome,Reference proteome,
Q1JQB2	BUB3 mitotic checkpoint protein(BUB3)	Bos taurus		GO:0000070~mitotic sister chromatid segregation,GO:0007094~mitotic spindle assembly checkpoint,GO:0008608~attachment of spindle microtubules to kinetochore,GO:0051301~cell division,GO:0051321~meiotic cell cycle,GO:0051983~regulation of chromosome segregation,GO:0071173~spindle assembly checkpoint,	GO:0000776~kinetochore,GO:0000777~condensed chromosome kinetochore,GO:0005654~nucleoplasm,GO:0033597~mitotic checkpoint complex,GO:1990298~bub1-bub3 complex,	GO:0043130~ubiquitin binding,	IPR001680:WD40 repeat,IPR015943:WD40/YVTN repeat-like-containing domain,IPR017986:WD40-repeat-containing domain,IPR020472:G-protein beta WD-40 repeat,	bta04110:Cell cycle,bta05166:HTLV-I infection,		SM00320:WD40,	Acetylation,ADP-ribosylation,Cell cycle,Cell division,Centromere,Chromosome,Chromosome partition,Complete proteome,Isopeptide bond,Kinetochore,Meiosis,Mitosis,Nucleus,Phosphoprotein,Reference proteome,Repeat,Ubl conjugation,WD repeat,	chain:Mitotic checkpoint protein bub3,cross-link:Glycyl lysine isopeptide (Lys-Gly) (interchain with G-Cter in ubiquitin),modified residue,repeat:WD 1,repeat:WD 2,repeat:WD 3,repeat:WD 4,repeat:WD 5,
A5D7I3	BUD13 homolog(BUD13)	Bos taurus			GO:0005634~nucleus,	GO:0044822~poly(A) RNA binding,	IPR018609:Bud13,				Complete proteome,Reference proteome,
Q2NKU3	BUD31 homolog(BUD31)	Bos taurus		GO:0000398~mRNA splicing, via spliceosome,GO:2000825~positive regulation of androgen receptor activity,	GO:0000790~nuclear chromatin,GO:0005681~spliceosomal complex,	GO:0030374~ligand-dependent nuclear receptor transcription coactivator activity,GO:0035257~nuclear hormone receptor binding,	IPR001748:G10 protein,IPR018230:BUD31/G10-related, conserved site,	bta03040:Spliceosome,			Acetylation,Complete proteome,Nucleus,Reference proteome,	chain:Protein BUD31 homolog,modified residue,short sequence motif:Nuclear localization signal,
E1B9T6	BarH like homeobox 1(BARHL1)	Bos taurus		GO:0001764~neuron migration,GO:0006357~regulation of transcription from RNA polymerase II promoter,GO:0007605~sensory perception of sound,GO:0030901~midbrain development,GO:0043524~negative regulation of neuron apoptotic process,	GO:0005634~nucleus,	GO:0000977~RNA polymerase II regulatory region sequence-specific DNA binding,GO:0001077~transcriptional activator activity, RNA polymerase II core promoter proximal region sequence-specific binding,GO:0001228~transcriptional activator activity, RNA polymerase II transcription regulatory region sequence-specific binding,	IPR001356:Homeodomain,IPR009057:Homeodomain-like,IPR017970:Homeobox, conserved site,IPR020479:Homeodomain, metazoa,			SM00389:HOX,	Complete proteome,DNA-binding,Homeobox,Nucleus,Reference proteome,
A6QNT9	Bardet-Biedl syndrome 12(BBS12)	Bos taurus		GO:0042073~intraciliary transport,GO:0042755~eating behavior,GO:0045494~photoreceptor cell maintenance,GO:0045599~negative regulation of fat cell differentiation,GO:0051131~chaperone-mediated protein complex assembly,	GO:0005929~cilium,	GO:0005524~ATP binding,	IPR002423:Chaperonin Cpn60/TCP-1,IPR027409:GroEL-like apical domain,IPR027413:GroEL-like equatorial domain,				Complete proteome,Reference proteome,
F1MU26	Bardet-Biedl syndrome 2(BBS2)	Bos taurus		GO:0007288~sperm axoneme assembly,GO:0007601~visual perception,GO:0010629~negative regulation of gene expression,GO:0014824~artery smooth muscle contraction,GO:0021756~striatum development,GO:0021766~hippocampus development,GO:0021987~cerebral cortex development,GO:0030534~adult behavior,GO:0035058~nonmotile primary cilium assembly,GO:0038108~negative regulation of appetite by leptin-mediated sig…	GO:0005737~cytoplasm,GO:0005815~microtubule organizing center,GO:0005902~microvillus,GO:0016020~membrane,GO:0031514~motile cilium,GO:0032420~stereocilium,GO:0034464~BBSome,GO:0036064~ciliary basal body,GO:0060170~ciliary membrane,		IPR016616:Bardet-Biedl syndrome 2 protein,IPR017986:WD40-repeat-containing domain,		PIRSF013684:Bardet-Biedl syndrome 2 protein,		Cell membrane,Cell projection,Cilium,Coiled coil,Complete proteome,Cytoplasm,Cytoskeleton,Membrane,Reference proteome,
Q1JQ97	Bardet-Biedl syndrome 4(BBS4)	Bos taurus		GO:0000281~mitotic cytokinesis,GO:0001764~neuron migration,GO:0001843~neural tube closure,GO:0003085~negative regulation of systemic arterial blood pressure,GO:0007286~spermatid development,GO:0007608~sensory perception of smell,GO:0010629~negative regulation of gene expression,GO:0015031~protein transport,GO:0016358~dendrite development,GO:0019216~regulation of lipid metabolic process,GO:0021591…	GO:0000242~pericentriolar material,GO:0001750~photoreceptor outer segment,GO:0001917~photoreceptor inner segment,GO:0005634~nucleus,GO:0005813~centrosome,GO:0005814~centriole,GO:0005929~cilium,GO:0031514~motile cilium,GO:0032391~photoreceptor connecting cilium,GO:0034451~centriolar satellite,GO:0034464~BBSome,GO:0035869~ciliary transition zone,GO:0036064~ciliary basal body,GO:0060170~ciliary memb…	GO:0001103~RNA polymerase II repressing transcription factor binding,GO:0003777~microtubule motor activity,GO:0034452~dynactin binding,GO:0043014~alpha-tubulin binding,GO:0048487~beta-tubulin binding,	IPR011990:Tetratricopeptide-like helical,IPR013026:Tetratricopeptide repeat-containing domain,IPR019734:Tetratricopeptide repeat,			SM00028:TPR,	Cell membrane,Cell projection,Cilium,Cilium biogenesis/degradation,Complete proteome,Cytoplasm,Cytoskeleton,Membrane,Protein transport,Reference proteome,Repeat,TPR repeat,Transport,	chain:Bardet-Biedl syndrome 4 protein homolog,region of interest:Interaction with PCM1,region of interest:Required for localization to centrosomes,repeat:TPR 1,repeat:TPR 10,repeat:TPR 2,repeat:TPR 3,repeat:TPR 4,repeat:TPR 5,repeat:TPR 6,repeat:TPR 7,repeat:TPR 8,repeat:TPR 9,
F1MB52	Bardet-Biedl syndrome 7(BBS7)	Bos taurus		GO:0001654~eye development,GO:0006357~regulation of transcription from RNA polymerase II promoter,GO:0007224~smoothened signaling pathway,GO:0007420~brain development,GO:0007507~heart development,GO:0008104~protein localization,GO:0032436~positive regulation of proteasomal ubiquitin-dependent protein catabolic process,GO:0035058~nonmotile primary cilium assembly,GO:0042384~cilium assembly,GO:0045…	GO:0001750~photoreceptor outer segment,GO:0005634~nucleus,GO:0005813~centrosome,GO:0005930~axoneme,GO:0016020~membrane,GO:0034464~BBSome,GO:0036064~ciliary basal body,		IPR015943:WD40/YVTN repeat-like-containing domain,IPR016575:Bardet-Biedl syndrome 7 protein,IPR017986:WD40-repeat-containing domain,		PIRSF011091:Bardet-Biedl syndrome 7 protein,		Coiled coil,Complete proteome,Reference proteome,
E1BHJ5	Bardet-Biedl syndrome 9(BBS9)	Bos taurus	Cell envelope biogenesis, outer membrane,	GO:0042384~cilium assembly,GO:0045444~fat cell differentiation,GO:0061512~protein localization to cilium,	GO:0000242~pericentriolar material,GO:0005929~cilium,GO:0016020~membrane,GO:0034451~centriolar satellite,GO:0034464~BBSome,GO:0035869~ciliary transition zone,		IPR026511:Parathyroid hormone-responsive B1,				Coiled coil,Complete proteome,Reference proteome,
O18815	Beta-defensin 13(DEFB13)	Bos taurus		GO:0042742~defense response to bacterium,	GO:0005576~extracellular region,		IPR001855:Beta defensin type,IPR006080:Beta defensin/Neutrophil defensin,			SM00048:DEFSN,	Antibiotic,Antimicrobial,Complete proteome,Defensin,Direct protein sequencing,Disulfide bond,Reference proteome,Secreted,Signal,
L8I8R9	Bruton tyrosine kinase(BTK)	Bos mutus		GO:0035556~intracellular signal transduction,	GO:0005622~intracellular,	GO:0004715~non-membrane spanning protein tyrosine kinase activity,GO:0005524~ATP binding,	IPR000719:Protein kinase, catalytic domain,IPR000980:SH2 domain,IPR001245:Serine-threonine/tyrosine-protein kinase catalytic domain,IPR001452:Src homology-3 domain,IPR001562:Zinc finger, Btk motif,IPR001849:Pleckstrin homology domain,IPR008266:Tyrosine-protein kinase, active site,IPR011009:Protein kinase-like domain,IPR011993:Pleckstrin homology-like domain,IPR017441:Protein kinase, ATP binding s…	bom04064:NF-kappa B signaling pathway,bom04380:Osteoclast differentiation,bom04611:Platelet activation,bom04662:B cell receptor signaling pathway,bom04664:Fc epsilon RI signaling pathway,bom05340:Primary immunodeficiency,		SM00107:BTK,SM00219:TyrKc,SM00233:PH,SM00252:SH2,SM00326:SH3,	ATP-binding,Kinase,Nucleotide-binding,SH3 domain,Transferase,Tyrosine-protein kinase,
E1BAG6	C-C motif chemokine ligand 1(CCL1)	Bos taurus		GO:0002548~monocyte chemotaxis,GO:0006954~inflammatory response,GO:0007186~G-protein coupled receptor signaling pathway,GO:0030593~neutrophil chemotaxis,GO:0043547~positive regulation of GTPase activity,GO:0048247~lymphocyte chemotaxis,GO:0050729~positive regulation of inflammatory response,GO:0070098~chemokine-mediated signaling pathway,GO:0070374~positive regulation of ERK1 and ERK2 cascade,GO:…	GO:0005615~extracellular space,	GO:0008009~chemokine activity,GO:0048020~CCR chemokine receptor binding,	IPR001811:Chemokine interleukin-8-like domain,	bta04062:Chemokine signaling pathway,		SM00199:SCY,	Complete proteome,Reference proteome,Signal,
F1MIF0	C-C motif chemokine ligand 17(CCL17)	Bos taurus		GO:0002548~monocyte chemotaxis,GO:0006954~inflammatory response,GO:0007186~G-protein coupled receptor signaling pathway,GO:0030593~neutrophil chemotaxis,GO:0043547~positive regulation of GTPase activity,GO:0045662~negative regulation of myoblast differentiation,GO:0048247~lymphocyte chemotaxis,GO:0070098~chemokine-mediated signaling pathway,GO:0070374~positive regulation of ERK1 and ERK2 cascade,…	GO:0005615~extracellular space,	GO:0008009~chemokine activity,GO:0048020~CCR chemokine receptor binding,	IPR000827:CC chemokine, conserved site,IPR001811:Chemokine interleukin-8-like domain,	bta04062:Chemokine signaling pathway,		SM00199:SCY,	Chemotaxis,Complete proteome,Cytokine,Reference proteome,Secreted,Signal,
Q8SQB1	C-C motif chemokine ligand 20(CCL20)	Bos taurus		GO:0002548~monocyte chemotaxis,GO:0006935~chemotaxis,GO:0006954~inflammatory response,GO:0007186~G-protein coupled receptor signaling pathway,GO:0030593~neutrophil chemotaxis,GO:0035584~calcium-mediated signaling using intracellular calcium source,GO:0043547~positive regulation of GTPase activity,GO:0048247~lymphocyte chemotaxis,GO:0060326~cell chemotaxis,GO:0070098~chemokine-mediated signaling p…	GO:0005615~extracellular space,GO:0005622~intracellular,	GO:0008009~chemokine activity,GO:0031731~CCR6 chemokine receptor binding,GO:0048020~CCR chemokine receptor binding,	IPR000827:CC chemokine, conserved site,IPR001811:Chemokine interleukin-8-like domain,	bta04060:Cytokine-cytokine receptor interaction,bta04062:Chemokine signaling pathway,bta04668:TNF signaling pathway,bta05323:Rheumatoid arthritis,		SM00199:SCY,	Chemotaxis,Complete proteome,Cytokine,Disulfide bond,Inflammatory response,Reference proteome,Secreted,Signal,	chain:C-C motif chemokine 20,disulfide bond,signal peptide,
F1N4S8	C-C motif chemokine ligand 21(CCL21)	Bos taurus		GO:0001768~establishment of T cell polarity,GO:0001954~positive regulation of cell-matrix adhesion,GO:0002407~dendritic cell chemotaxis,GO:0002548~monocyte chemotaxis,GO:0006954~inflammatory response,GO:0006955~immune response,GO:0007186~G-protein coupled receptor signaling pathway,GO:0030593~neutrophil chemotaxis,GO:0030838~positive regulation of actin filament polymerization,GO:0031274~positive…	GO:0005576~extracellular region,GO:0005615~extracellular space,GO:0005623~cell,	GO:0008009~chemokine activity,GO:0048020~CCR chemokine receptor binding,	IPR001811:Chemokine interleukin-8-like domain,	bta04060:Cytokine-cytokine receptor interaction,bta04062:Chemokine signaling pathway,bta04064:NF-kappa B signaling pathway,		SM00199:SCY,	Complete proteome,Reference proteome,Signal,
Q148L4	C-C motif chemokine ligand 25(CCL25)	Bos taurus		GO:0001954~positive regulation of cell-matrix adhesion,GO:0002548~monocyte chemotaxis,GO:0006954~inflammatory response,GO:0006955~immune response,GO:0007186~G-protein coupled receptor signaling pathway,GO:0030593~neutrophil chemotaxis,GO:0043547~positive regulation of GTPase activity,GO:0048247~lymphocyte chemotaxis,GO:0060326~cell chemotaxis,GO:0070098~chemokine-mediated signaling pathway,GO:007…	GO:0005576~extracellular region,GO:0005615~extracellular space,	GO:0008009~chemokine activity,GO:0048020~CCR chemokine receptor binding,	IPR001811:Chemokine interleukin-8-like domain,	bta04060:Cytokine-cytokine receptor interaction,bta04062:Chemokine signaling pathway,bta04672:Intestinal immune network for IgA production,		SM00199:SCY,	Complete proteome,Reference proteome,Signal,
D9ZDE4	C-C motif chemokine receptor 10(CCR10)	Bos taurus		GO:0006935~chemotaxis,GO:0006955~immune response,GO:0007204~positive regulation of cytosolic calcium ion concentration,	GO:0009986~cell surface,GO:0016021~integral component of membrane,	GO:0016493~C-C chemokine receptor activity,	IPR000276:G protein-coupled receptor, rhodopsin-like,IPR005382:CC chemokine receptor 10,IPR017452:GPCR, rhodopsin-like, 7TM,	bta04060:Cytokine-cytokine receptor interaction,bta04062:Chemokine signaling pathway,bta04672:Intestinal immune network for IgA production,			Complete proteome,G-protein coupled receptor,Membrane,Receptor,Reference proteome,Transducer,Transmembrane,Transmembrane helix,
D9ZDE1	C-C motif chemokine receptor 6(CCR6)	Bos taurus		GO:0006935~chemotaxis,GO:0006955~immune response,	GO:0009986~cell surface,GO:0016021~integral component of membrane,	GO:0016493~C-C chemokine receptor activity,	IPR000276:G protein-coupled receptor, rhodopsin-like,IPR000355:Chemokine receptor family,IPR004067:CC chemokine receptor 6,IPR017452:GPCR, rhodopsin-like, 7TM,	bta04060:Cytokine-cytokine receptor interaction,bta04062:Chemokine signaling pathway,			Complete proteome,G-protein coupled receptor,Membrane,Receptor,Reference proteome,Transducer,Transmembrane,Transmembrane helix,
A4IF92	C-C motif chemokine receptor 9(CCR9)	Bos taurus		GO:0002305~CD8-positive, gamma-delta intraepithelial T cell differentiation,GO:0006935~chemotaxis,GO:0006955~immune response,	GO:0009986~cell surface,GO:0016021~integral component of membrane,	GO:0004950~chemokine receptor activity,GO:0016493~C-C chemokine receptor activity,	IPR000276:G protein-coupled receptor, rhodopsin-like,IPR000355:Chemokine receptor family,IPR004069:CC chemokine receptor 9,IPR017452:GPCR, rhodopsin-like, 7TM,	bta04060:Cytokine-cytokine receptor interaction,bta04062:Chemokine signaling pathway,bta04672:Intestinal immune network for IgA production,			Complete proteome,G-protein coupled receptor,Membrane,Receptor,Reference proteome,Transducer,Transmembrane,Transmembrane helix,
L8ICK9	C-X-C motif chemokine ligand 13(CXCL13)	Bos mutus		GO:0006954~inflammatory response,GO:0006955~immune response,GO:0060326~cell chemotaxis,	GO:0005615~extracellular space,		IPR001089:CXC chemokine,IPR001811:Chemokine interleukin-8-like domain,IPR018048:CXC chemokine, conserved site,	bom04060:Cytokine-cytokine receptor interaction,bom04062:Chemokine signaling pathway,		SM00199:SCY,	Chemotaxis,Cytokine,Disulfide bond,Secreted,Signal,
Q3SZM6	C-X9-C motif containing 1(CMC1)	Bos taurus			GO:0005739~mitochondrion,	GO:0046872~metal ion binding,	IPR013892:Cytochrome c oxidase biogenesis protein Cmc1-like,				Acetylation,Complete proteome,Copper,Disulfide bond,Metal-binding,Mitochondrion,Reference proteome,	chain:COX assembly mitochondrial protein homolog,modified residue,
A5D9F1	C-terminal binding protein 1(CTBP1)	Bos taurus	Energy production and conversion / Coenzyme metabolism / General function prediction only,	GO:0000122~negative regulation of transcription from RNA polymerase II promoter,GO:0031065~positive regulation of histone deacetylation,GO:0050872~white fat cell differentiation,GO:0051726~regulation of cell cycle,GO:0090241~negative regulation of histone H4 acetylation,GO:1903758~negative regulation of transcription from RNA polymerase II promoter by histone modification,	GO:0005634~nucleus,GO:0005654~nucleoplasm,GO:0005667~transcription factor complex,GO:0017053~transcriptional repressor complex,	GO:0001106~RNA polymerase II transcription corepressor activity,GO:0003700~transcription factor activity, sequence-specific DNA binding,GO:0003714~transcription corepressor activity,GO:0016616~oxidoreductase activity, acting on the CH-OH group of donors, NAD or NADP as acceptor,GO:0042803~protein homodimerization activity,GO:0051287~NAD binding,	IPR006139:D-isomer specific 2-hydroxyacid dehydrogenase, catalytic domain,IPR006140:D-isomer specific 2-hydroxyacid dehydrogenase, NAD-binding,IPR016040:NAD(P)-binding domain,	bta04310:Wnt signaling pathway,bta04330:Notch signaling pathway,bta05200:Pathways in cancer,bta05220:Chronic myeloid leukemia,			Complete proteome,Oxidoreductase,Reference proteome,
A5D7L1	C-type lectin domain family 11 member A(CLEC11A)	Bos taurus		GO:0008284~positive regulation of cell proliferation,	GO:0005615~extracellular space,		IPR001304:C-type lectin,IPR016186:C-type lectin-like,IPR016187:C-type lectin fold,IPR018378:C-type lectin, conserved site,			SM00034:CLECT,	Complete proteome,Disulfide bond,Reference proteome,Signal,
A6QQ44	C-type lectin domain family 18 member C(CLEC18C)	Bos taurus					IPR000742:Epidermal growth factor-like domain,IPR001283:Allergen V5/Tpx-1-related,IPR013032:EGF-like, conserved site,IPR014044:CAP domain,IPR016186:C-type lectin-like,IPR016187:C-type lectin fold,			SM00181:EGF,SM00198:SCP,	EGF-like domain,Signal,
E1B7F4	C-type lectin domain family 4 member G(CLEC4G)	Bos taurus		GO:0002710~negative regulation of T cell mediated immunity,GO:0042130~negative regulation of T cell proliferation,	GO:0005886~plasma membrane,GO:0016021~integral component of membrane,	GO:0030247~polysaccharide binding,	IPR001304:C-type lectin,IPR016186:C-type lectin-like,IPR016187:C-type lectin fold,IPR018378:C-type lectin, conserved site,			SM00034:CLECT,	Coiled coil,Complete proteome,Disulfide bond,Membrane,Reference proteome,Transmembrane,Transmembrane helix,
E1BKB0	C-type lectin domain family 9 member A(CLEC9A)	Bos taurus		GO:0006898~receptor-mediated endocytosis,GO:0050715~positive regulation of cytokine secretion,	GO:0009986~cell surface,GO:0016021~integral component of membrane,		IPR001304:C-type lectin,IPR016186:C-type lectin-like,IPR016187:C-type lectin fold,IPR018378:C-type lectin, conserved site,			SM00034:CLECT,	Complete proteome,Disulfide bond,Membrane,Reference proteome,Transmembrane,Transmembrane helix,
G5E5C9	C1GALT1-specific chaperone 1(LOC523130)	Bos taurus		GO:0016267~O-glycan processing, core 1,	GO:0016021~integral component of membrane,	GO:0016263~glycoprotein-N-acetylgalactosamine 3-beta-galactosyltransferase activity,	IPR026731:C1GALT1-specific chaperone 1,				Complete proteome,Membrane,Reference proteome,Transmembrane,Transmembrane helix,
A3KMW5	C1q and tumor necrosis factor related protein 1(C1QTNF1)	Bos taurus		GO:0007204~positive regulation of cytosolic calcium ion concentration,GO:0010628~positive regulation of gene expression,GO:0010906~regulation of glucose metabolic process,GO:0043410~positive regulation of MAPK cascade,GO:0051260~protein homooligomerization,GO:0051897~positive regulation of protein kinase B signaling,GO:0070208~protein heterotrimerization,GO:0090331~negative regulation of platelet…	GO:0005581~collagen trimer,GO:0005615~extracellular space,GO:0005887~integral component of plasma membrane,		IPR001073:Complement C1q protein,IPR008160:Collagen triple helix repeat,IPR008983:Tumour necrosis factor-like domain,			SM00110:C1Q,	Collagen,Complete proteome,Reference proteome,Secreted,Signal,
E1BF11	C1q and tumor necrosis factor related protein 8(C1QTNF8)	Bos taurus			GO:0005576~extracellular region,GO:0005581~collagen trimer,		IPR001073:Complement C1q protein,IPR008160:Collagen triple helix repeat,IPR008983:Tumour necrosis factor-like domain,			SM00110:C1Q,	Collagen,Complete proteome,Reference proteome,Secreted,Signal,
F1MZ05	C2 calcium dependent domain containing 2(C2CD2)	Bos taurus			GO:0005634~nucleus,GO:0005829~cytosol,GO:0016021~integral component of membrane,		IPR000008:C2 calcium-dependent membrane targeting,			SM00239:C2,	Complete proteome,Membrane,Reference proteome,Transmembrane,Transmembrane helix,
Q2KJ18	C2 calcium dependent domain containing 4B(C2CD4B)	Bos taurus		GO:0006906~vesicle fusion,GO:0017158~regulation of calcium ion-dependent exocytosis,GO:0048791~calcium ion-regulated exocytosis of neurotransmitter,	GO:0005634~nucleus,GO:0005886~plasma membrane,	GO:0005509~calcium ion binding,GO:0005544~calcium-dependent phospholipid binding,GO:0019905~syntaxin binding,GO:0030276~clathrin binding,					Complete proteome,Nucleus,Reference proteome,	chain:Nuclear-localized factor 1,domain:C2,
G3N2V3	C2 calcium dependent domain containing 4C(C2CD4C)	Bos taurus			GO:0005886~plasma membrane,	GO:0005509~calcium ion binding,GO:0005544~calcium-dependent phospholipid binding,	IPR000008:C2 calcium-dependent membrane targeting,			SM00239:C2,	Complete proteome,Reference proteome,
A6QLT3	C2 calcium dependent domain containing 5(C2CD5)	Bos taurus		GO:0006906~vesicle fusion,GO:0031340~positive regulation of vesicle fusion,GO:0038028~insulin receptor signaling pathway via phosphatidylinositol 3-kinase,GO:0065002~intracellular protein transmembrane transport,GO:0072659~protein localization to plasma membrane,GO:0090314~positive regulation of protein targeting to membrane,GO:2001275~positive regulation of glucose import in response to insulin …	GO:0005815~microtubule organizing center,GO:0005886~plasma membrane,GO:0005938~cell cortex,GO:0030659~cytoplasmic vesicle membrane,GO:0032587~ruffle membrane,	GO:0005509~calcium ion binding,GO:0005544~calcium-dependent phospholipid binding,	IPR000008:C2 calcium-dependent membrane targeting,			SM00239:C2,	Complete proteome,Reference proteome,
A7Z071	C2CD2 like(C2CD2L)	Bos taurus		GO:0035774~positive regulation of insulin secretion involved in cellular response to glucose stimulus,	GO:0016021~integral component of membrane,		IPR000008:C2 calcium-dependent membrane targeting,				Complete proteome,Membrane,Reference proteome,Transmembrane,Transmembrane helix,
E3W9A2	CAP-Gly domain containing linker protein 1(CLIP1)	Bos taurus		GO:0001578~microtubule bundle formation,GO:0031116~positive regulation of microtubule polymerization,GO:0044861~protein transport into plasma membrane raft,	GO:0005635~nuclear envelope,GO:0005813~centrosome,GO:0005881~cytoplasmic microtubule,GO:0016020~membrane,GO:0035371~microtubule plus-end,GO:0044354~macropinosome,	GO:0008270~zinc ion binding,	IPR000938:CAP Gly-rich domain,			SM01052:SM01052,	Coiled coil,Complete proteome,Proteomics identification,Reference proteome,
E1BGH3	CAP-Gly domain containing linker protein 2(CLIP2)	Bos taurus	Cell division and chromosome partitioning,		GO:0005881~cytoplasmic microtubule,GO:0035371~microtubule plus-end,		IPR000938:CAP Gly-rich domain,			SM01052:SM01052,	Coiled coil,Complete proteome,Proteomics identification,Reference proteome,
E1BAL0	CAP-Gly domain containing linker protein 3(CLIP3)	Bos taurus		GO:0001934~positive regulation of protein phosphorylation,GO:0010828~positive regulation of glucose transport,GO:0018230~peptidyl-L-cysteine S-palmitoylation,GO:0031115~negative regulation of microtubule polymerization,GO:0043065~positive regulation of apoptotic process,GO:0044091~membrane biogenesis,GO:0045444~fat cell differentiation,GO:0045807~positive regulation of endocytosis,GO:0072321~chap…	GO:0005802~trans-Golgi network,GO:0005886~plasma membrane,GO:0031901~early endosome membrane,GO:0032588~trans-Golgi network membrane,GO:0045121~membrane raft,GO:0055038~recycling endosome membrane,	GO:0008017~microtubule binding,GO:0035594~ganglioside binding,	IPR000938:CAP Gly-rich domain,IPR002110:Ankyrin repeat,IPR020683:Ankyrin repeat-containing domain,			SM00248:ANK,SM01052:SM01052,	ANK repeat,Complete proteome,Reference proteome,
F1MUQ4	CAP-Gly domain containing linker protein family member 4(CLIP4)	Bos taurus			GO:0016021~integral component of membrane,		IPR000938:CAP Gly-rich domain,IPR002110:Ankyrin repeat,IPR020683:Ankyrin repeat-containing domain,			SM00248:ANK,SM01052:SM01052,	ANK repeat,Complete proteome,Membrane,Reference proteome,Transmembrane,Transmembrane helix,
F1MBE8	CAS1 domain containing 1(CASD1)	Bos taurus			GO:0016021~integral component of membrane,		IPR012419:Cas1p 10 TM acyl transferase domain,IPR013763:Cyclin-like,				Complete proteome,Membrane,Reference proteome,Transmembrane,Transmembrane helix,
F1MB71	CASK interacting protein 1(CASKIN1)	Bos taurus		GO:0007165~signal transduction,	GO:0005737~cytoplasm,		IPR001452:Src homology-3 domain,IPR001660:Sterile alpha motif domain,IPR002110:Ankyrin repeat,IPR011511:Variant SH3,IPR013761:Sterile alpha motif/pointed domain,IPR020683:Ankyrin repeat-containing domain,IPR027013:Caskin,			SM00248:ANK,SM00326:SH3,SM00454:SAM,	ANK repeat,Complete proteome,Reference proteome,Repeat,
E1BIJ3	CASK interacting protein 2(CASKIN2)	Bos taurus	General function prediction only,	GO:0007165~signal transduction,	GO:0005737~cytoplasm,		IPR001452:Src homology-3 domain,IPR001660:Sterile alpha motif domain,IPR002110:Ankyrin repeat,IPR011511:Variant SH3,IPR013761:Sterile alpha motif/pointed domain,IPR020683:Ankyrin repeat-containing domain,			SM00248:ANK,SM00326:SH3,SM00454:SAM,	ANK repeat,Complete proteome,Reference proteome,Repeat,
F1MJ18	CBFA2/RUNX1 translocation partner 2(CBFA2T2)	Bos taurus		GO:0010976~positive regulation of neuron projection development,GO:0030855~epithelial cell differentiation,GO:0045892~negative regulation of transcription, DNA-templated,GO:0045944~positive regulation of transcription from RNA polymerase II promoter,	GO:0005634~nucleus,	GO:0003700~transcription factor activity, sequence-specific DNA binding,GO:0003714~transcription corepressor activity,GO:0046872~metal ion binding,	IPR002893:Zinc finger, MYND-type,IPR003894:TAFH/NHR1,IPR013289:Eight-Twenty-One,IPR013291:Myeloid transforming gene-related protein-1 (MTGR1),IPR014896:NHR2-like,			SM00549:TAFH,	Complete proteome,Metal-binding,Reference proteome,Zinc,Zinc-finger,
E1BDB7	CCAAT/enhancer binding protein epsilon(CEBPE)	Bos taurus		GO:0006909~phagocytosis,GO:0030225~macrophage differentiation,GO:0042089~cytokine biosynthetic process,GO:0042742~defense response to bacterium,	GO:0005654~nucleoplasm,	GO:0000978~RNA polymerase II core promoter proximal region sequence-specific DNA binding,GO:0001077~transcriptional activator activity, RNA polymerase II core promoter proximal region sequence-specific binding,	IPR004827:Basic-leucine zipper domain,IPR016468:CCAAT/enhancer-binding,	bta05202:Transcriptional misregulation in cancer,	PIRSF005879:CCAAT/enhancer-binding protein,	SM00338:BRLZ,	Coiled coil,Complete proteome,Reference proteome,
L8II54	CCCTC-binding factor(CTCF)	Bos mutus				GO:0003676~nucleic acid binding,GO:0046872~metal ion binding,	IPR007087:Zinc finger, C2H2,IPR013087:Zinc finger C2H2-type/integrase DNA-binding domain,IPR015880:Zinc finger, C2H2-like,			SM00355:ZnF_C2H2,
E1BN45	CCM2 like scaffolding protein(CCM2L)	Bos taurus		GO:0003209~cardiac atrium morphogenesis,GO:0003222~ventricular trabecula myocardium morphogenesis,GO:0032091~negative regulation of protein binding,GO:0034111~negative regulation of homotypic cell-cell adhesion,GO:0042060~wound healing,GO:0055017~cardiac muscle tissue growth,GO:0090271~positive regulation of fibroblast growth factor production,			IPR026159:Malcavernin,				Complete proteome,Reference proteome,
F1MHU9	CCR4-NOT transcription complex subunit 1(CNOT1)	Bos taurus		GO:0000122~negative regulation of transcription from RNA polymerase II promoter,GO:0000288~nuclear-transcribed mRNA catabolic process, deadenylation-dependent decay,GO:0010606~positive regulation of cytoplasmic mRNA processing body assembly,GO:0017148~negative regulation of translation,GO:0033147~negative regulation of intracellular estrogen receptor signaling pathway,GO:0035195~gene silencing by…	GO:0000932~cytoplasmic mRNA processing body,GO:0005615~extracellular space,GO:0016020~membrane,GO:0030015~CCR4-NOT core complex,GO:0043231~intracellular membrane-bounded organelle,	GO:0004535~poly(A)-specific ribonuclease activity,GO:0032947~protein complex scaffold,GO:0044822~poly(A) RNA binding,	IPR007196:CCR4-Not complex component, Not1, C-terminal,IPR024557:CCR4-Not complex, Not1 subunit, domain of unknown function DUF3819,	bta03018:RNA degradation,			Complete proteome,Reference proteome,
A4IFB6	CCR4-NOT transcription complex subunit 10(CNOT10)	Bos taurus			GO:0016020~membrane,GO:0030014~CCR4-NOT complex,		IPR011990:Tetratricopeptide-like helical,IPR019734:Tetratricopeptide repeat,	bta03018:RNA degradation,		SM00028:TPR,	Acetylation,Coiled coil,Complete proteome,Reference proteome,	chain:CCR4-NOT transcription complex subunit 10,modified residue,
E1BHL0	CCR4-NOT transcription complex subunit 11(CNOT11)	Bos taurus			GO:0030014~CCR4-NOT complex,		IPR019312:Protein of unknown function DUF2363,				Complete proteome,Reference proteome,
A6QR51	CCR4-NOT transcription complex subunit 6(CNOT6)	Bos taurus	Function unknown,	GO:0008284~positive regulation of cell proliferation,GO:0010606~positive regulation of cytoplasmic mRNA processing body assembly,GO:0043928~exonucleolytic nuclear-transcribed mRNA catabolic process involved in deadenylation-dependent decay,GO:0070966~nuclear-transcribed mRNA catabolic process, no-go decay,GO:2000327~positive regulation of ligand-dependent nuclear receptor transcription coactivato…	GO:0016020~membrane,GO:0030014~CCR4-NOT complex,	GO:0004535~poly(A)-specific ribonuclease activity,	IPR001611:Leucine-rich repeat,IPR003591:Leucine-rich repeat, typical subtype,IPR005135:Endonuclease/exonuclease/phosphatase,	bta03018:RNA degradation,		SM00369:LRR_TYP,	Complete proteome,Reference proteome,
A7MB47	CCR4-NOT transcription complex subunit 9(CNOT9)	Bos taurus		GO:0006351~transcription, DNA-templated,GO:0006355~regulation of transcription, DNA-templated,GO:0006402~mRNA catabolic process,GO:0017148~negative regulation of translation,GO:0019221~cytokine-mediated signaling pathway,GO:0031047~gene silencing by RNA,GO:0033147~negative regulation of intracellular estrogen receptor signaling pathway,GO:2000327~positive regulation of ligand-dependent nuclear re…	GO:0000932~cytoplasmic mRNA processing body,GO:0005634~nucleus,GO:0016020~membrane,GO:0030014~CCR4-NOT complex,GO:0030015~CCR4-NOT core complex,	GO:0019904~protein domain specific binding,GO:0042803~protein homodimerization activity,	IPR007216:Rcd1,IPR011989:Armadillo-like helical,IPR016024:Armadillo-type fold,	bta03018:RNA degradation,			Acetylation,Activator,Complete proteome,Cytoplasm,Nucleus,Reference proteome,Repressor,RNA-mediated gene silencing,Transcription,Transcription regulation,Translation regulation,	chain:Cell differentiation protein RCD1 homolog,modified residue,
Q0VD30	CCZ1 homolog, vacuolar protein trafficking and biogenesis associated(CCZ1)	Bos taurus		GO:0016192~vesicle-mediated transport,GO:0043547~positive regulation of GTPase activity,	GO:0005765~lysosomal membrane,GO:0031988~membrane-bounded vesicle,GO:0043231~intracellular membrane-bounded organelle,	GO:0005085~guanyl-nucleotide exchange factor activity,	IPR013176:Protein of unknown function DUF1712, fungi,				Acetylation,Complete proteome,Guanine-nucleotide releasing factor,Lysosome,Membrane,Phosphoprotein,Reference proteome,	chain:UPF0550 protein C7orf28 homolog,modified residue,
F1MCK5	CD101 molecule(CD101)	Bos taurus		GO:0002763~positive regulation of myeloid leukocyte differentiation,GO:0007166~cell surface receptor signaling pathway,	GO:0005886~plasma membrane,GO:0016021~integral component of membrane,GO:0070062~extracellular exosome,		IPR003599:Immunoglobulin subtype,IPR007110:Immunoglobulin-like domain,IPR013098:Immunoglobulin I-set,IPR013106:Immunoglobulin V-set,IPR013151:Immunoglobulin,IPR013783:Immunoglobulin-like fold,			SM00406:IGv,SM00409:IG,	Complete proteome,Immunoglobulin domain,Membrane,Reference proteome,Transmembrane,Transmembrane helix,
F1MPE1	CD109 molecule(CD109)	Bos taurus		GO:0001933~negative regulation of protein phosphorylation,GO:0001942~hair follicle development,GO:0010839~negative regulation of keratinocyte proliferation,GO:0030512~negative regulation of transforming growth factor beta receptor signaling pathway,GO:0045616~regulation of keratinocyte differentiation,GO:0061045~negative regulation of wound healing,GO:0072675~osteoclast fusion,	GO:0005615~extracellular space,GO:0009986~cell surface,	GO:0004866~endopeptidase inhibitor activity,	IPR001599:Alpha-2-macroglobulin,IPR002890:Alpha-2-macroglobulin, N-terminal,IPR008930:Terpenoid cyclases/protein prenyltransferase alpha-alpha toroid,IPR009048:Alpha-macroglobulin, receptor-binding,IPR011625:Alpha-2-macroglobulin, N-terminal 2,IPR011626:A-macroglobulin complement component,IPR014756:Immunoglobulin E-set,IPR019565:Alpha-2-macroglobulin, thiol-ester bond-forming,IPR019742:Alpha-2-m…			SM01359:SM01359,SM01360:SM01360,SM01361:SM01361,	Complete proteome,Reference proteome,Signal,
P85521	CD163 molecule(CD163)	Bos taurus		GO:0006898~receptor-mediated endocytosis,GO:0006953~acute-phase response,	GO:0005576~extracellular region,GO:0005886~plasma membrane,GO:0016021~integral component of membrane,	GO:0005044~scavenger receptor activity,	IPR001190:Speract/scavenger receptor,IPR017448:Speract/scavenger receptor-related,			SM00202:SR,	Acute phase,Cell membrane,Complete proteome,Disulfide bond,Glycoprotein,Inflammatory response,Membrane,Phosphoprotein,Reference proteome,Repeat,Secreted,Signal,Transmembrane,Transmembrane helix,	chain:Scavenger receptor cysteine-rich type 1 protein M130,chain:Soluble CD163,disulfide bond,domain:SRCR 1,domain:SRCR 2,domain:SRCR 3,domain:SRCR 4,domain:SRCR 5,domain:SRCR 6,domain:SRCR 7,domain:SRCR 8,domain:SRCR 9,glycosylation site:N-linked (GlcNAc...),modified residue,sequence conflict,short sequence motif:Internalization signal,signal peptide,site:Cleavage; in calcium-free condition,topo…
P30205	CD163 molecule-like 1(CD163L1)	Bos taurus		GO:0006898~receptor-mediated endocytosis,	GO:0005576~extracellular region,GO:0016020~membrane,	GO:0005044~scavenger receptor activity,	IPR001190:Speract/scavenger receptor,IPR017448:Speract/scavenger receptor-related,			SM00202:SR,	Complete proteome,Disulfide bond,Glycoprotein,Reference proteome,Repeat,Secreted,Signal,	chain:Antigen WC1.1,disulfide bond,domain:SRCR 1,domain:SRCR 10,domain:SRCR 11,domain:SRCR 2,domain:SRCR 3,domain:SRCR 4,domain:SRCR 5,domain:SRCR 6,domain:SRCR 7,domain:SRCR 8,domain:SRCR 9,glycosylation site:N-linked (GlcNAc...),signal peptide,
A6QNK7	CD180 molecule(CD180)	Bos taurus		GO:0002224~toll-like receptor signaling pathway,GO:0002322~B cell proliferation involved in immune response,GO:0006954~inflammatory response,GO:0031666~positive regulation of lipopolysaccharide-mediated signaling pathway,GO:0071222~cellular response to lipopolysaccharide,	GO:0005887~integral component of plasma membrane,GO:0016021~integral component of membrane,	GO:0004872~receptor activity,	IPR000483:Cysteine-rich flanking region, C-terminal,IPR001611:Leucine-rich repeat,IPR003591:Leucine-rich repeat, typical subtype,			SM00082:LRRCT,SM00369:LRR_TYP,	3D-structure,Complete proteome,Leucine-rich repeat,Membrane,Reference proteome,Repeat,Signal,Transmembrane,Transmembrane helix,
A1L565	CD1D antigen, d polypeptide(CD1D)	Bos taurus			GO:0016021~integral component of membrane,		IPR003597:Immunoglobulin C1-set,IPR007110:Immunoglobulin-like domain,IPR011161:MHC class I-like antigen recognition,IPR011162:MHC classes I/II-like antigen recognition protein,IPR013783:Immunoglobulin-like fold,	bta04640:Hematopoietic cell lineage,		SM00407:IGc1,	3D-structure,Membrane,Transmembrane,Transmembrane helix,
F1MM14	CD2 associated protein(CD2AP)	Bos taurus		GO:0032911~negative regulation of transforming growth factor beta1 production,GO:1900182~positive regulation of protein localization to nucleus,GO:2000249~regulation of actin cytoskeleton reorganization,	GO:0001726~ruffle,GO:0005730~nucleolus,GO:0005737~cytoplasm,GO:0005886~plasma membrane,GO:0005911~cell-cell junction,GO:0031941~filamentous actin,GO:0070062~extracellular exosome,		IPR001452:Src homology-3 domain,	bta05100:Bacterial invasion of epithelial cells,		SM00326:SH3,	Coiled coil,Complete proteome,Reference proteome,SH3 domain,
A4IFR1	CD2 cytoplasmic tail binding protein 2(CD2BP2)	Bos taurus		GO:0010923~negative regulation of phosphatase activity,	GO:0005682~U5 snRNP,GO:0005737~cytoplasm,GO:0016607~nuclear speck,	GO:0043021~ribonucleoprotein complex binding,	IPR003169:GYF,			SM00444:GYF,	Complete proteome,Reference proteome,
E1BB51	CD207 molecule(CD207)	Bos taurus		GO:0051607~defense response to virus,	GO:0016021~integral component of membrane,	GO:0030246~carbohydrate binding,	IPR001304:C-type lectin,IPR016186:C-type lectin-like,IPR016187:C-type lectin fold,IPR018378:C-type lectin, conserved site,			SM00034:CLECT,	Coiled coil,Complete proteome,Disulfide bond,Membrane,Reference proteome,Transmembrane,Transmembrane helix,
E1BC38	CD248 molecule(CD248)	Bos taurus		GO:0008284~positive regulation of cell proliferation,GO:0016477~cell migration,GO:0048535~lymph node development,GO:0060033~anatomical structure regression,GO:2000353~positive regulation of endothelial cell apoptotic process,	GO:0005737~cytoplasm,GO:0016021~integral component of membrane,GO:0070062~extracellular exosome,	GO:0005509~calcium ion binding,GO:0050840~extracellular matrix binding,	IPR000152:EGF-type aspartate/asparagine hydroxylation site,IPR000742:Epidermal growth factor-like domain,IPR001304:C-type lectin,IPR001881:EGF-like calcium-binding,IPR009030:Insulin-like growth factor binding protein, N-terminal,IPR016186:C-type lectin-like,IPR016187:C-type lectin fold,IPR018097:EGF-like calcium-binding, conserved site,			SM00034:CLECT,SM00179:EGF_CA,SM00181:EGF,	Complete proteome,Disulfide bond,EGF-like domain,Membrane,Reference proteome,Signal,Transmembrane,Transmembrane helix,
A6QPS6	CD300 molecule-like family member b(CD300LB)	Bos taurus					IPR003599:Immunoglobulin subtype,IPR007110:Immunoglobulin-like domain,IPR013106:Immunoglobulin V-set,IPR013783:Immunoglobulin-like fold,			SM00409:IG,	Complete proteome,Reference proteome,Signal,
E1BEM6	CD300a molecule(CD300A)	Bos taurus			GO:0016021~integral component of membrane,		IPR003599:Immunoglobulin subtype,IPR007110:Immunoglobulin-like domain,IPR013106:Immunoglobulin V-set,IPR013783:Immunoglobulin-like fold,			SM00409:IG,	Complete proteome,Membrane,Reference proteome,Signal,Transmembrane,Transmembrane helix,
E1B8E5	CD33 antigen-like(LOC100138951)	Bos taurus			GO:0016021~integral component of membrane,		IPR003599:Immunoglobulin subtype,IPR007110:Immunoglobulin-like domain,IPR013106:Immunoglobulin V-set,IPR013783:Immunoglobulin-like fold,	bta04640:Hematopoietic cell lineage,		SM00409:IG,	Complete proteome,Membrane,Reference proteome,Signal,Transmembrane,Transmembrane helix,
Q9TTF5	CD38 molecule(CD38)	Bos taurus		GO:0008152~metabolic process,GO:0030890~positive regulation of B cell proliferation,GO:0042493~response to drug,GO:0043066~negative regulation of apoptotic process,GO:0045892~negative regulation of transcription, DNA-templated,GO:0045893~positive regulation of transcription, DNA-templated,GO:0050853~B cell receptor signaling pathway,	GO:0005886~plasma membrane,GO:0009986~cell surface,GO:0016021~integral component of membrane,GO:0070062~extracellular exosome,	GO:0003953~NAD+ nucleosidase activity,GO:0016849~phosphorus-oxygen lyase activity,GO:0050135~NAD(P)+ nucleosidase activity,	IPR003193:ADP-ribosyl cyclase (CD38/157),IPR016040:NAD(P)-binding domain,	bta00760:Nicotinate and nicotinamide metabolism,bta01100:Metabolic pathways,bta04020:Calcium signaling pathway,bta04921:Oxytocin signaling pathway,bta04970:Salivary secretion,bta04972:Pancreatic secretion,bta05169:Epstein-Barr virus infection,			3D-structure,Complete proteome,Glycosidase,Hydrolase,Membrane,Reference proteome,Signal,Transmembrane,Transmembrane helix,
L8IA74	CD3e molecule associated protein(CD3EAP)	Bos mutus				GO:0003899~DNA-directed RNA polymerase activity,	IPR013240:DNA-directed RNA polymerase I, subunit RPA34.5,				DNA-directed RNA polymerase,Transcription,
I0J0J9	CD4 molecule(CD4)	Bos taurus		GO:0001816~cytokine production,GO:0006948~induction by virus of host cell-cell fusion,GO:0006955~immune response,GO:0007155~cell adhesion,GO:0007166~cell surface receptor signaling pathway,GO:0032507~maintenance of protein location in cell,GO:0035397~helper T cell enhancement of adaptive immune response,GO:0045058~T cell selection,GO:0045860~positive regulation of protein kinase activity,GO:00507…	GO:0005788~endoplasmic reticulum lumen,GO:0005789~endoplasmic reticulum membrane,GO:0009897~external side of plasma membrane,GO:0016021~integral component of membrane,GO:0045121~membrane raft,	GO:0001948~glycoprotein binding,GO:0008270~zinc ion binding,GO:0015026~coreceptor activity,	IPR000973:T-cell surface antigen CD4,IPR003598:Immunoglobulin subtype 2,IPR003599:Immunoglobulin subtype,IPR007110:Immunoglobulin-like domain,IPR008424:Immunoglobulin C2-set,IPR013106:Immunoglobulin V-set,IPR013151:Immunoglobulin,IPR013783:Immunoglobulin-like fold,IPR015274:CD4, extracellular,IPR021963:T cell CD4 receptor C-terminal region,	bta04514:Cell adhesion molecules (CAMs),bta04612:Antigen processing and presentation,bta04640:Hematopoietic cell lineage,bta04660:T cell receptor signaling pathway,bta05340:Primary immunodeficiency,		SM00406:IGv,SM00408:IGc2,SM00409:IG,	Complete proteome,Immunoglobulin domain,Membrane,Reference proteome,Signal,Transmembrane,Transmembrane helix,
F1MLR1	CD46 molecule(CD46)	Bos taurus		GO:0002456~T cell mediated immunity,GO:0006958~complement activation, classical pathway,GO:0007338~single fertilization,GO:0008593~regulation of Notch signaling pathway,GO:0010628~positive regulation of gene expression,GO:0010629~negative regulation of gene expression,GO:0032613~interleukin-10 production,GO:0032733~positive regulation of interleukin-10 production,GO:0035581~sequestering of extrac…	GO:0002079~inner acrosomal membrane,GO:0005886~plasma membrane,GO:0005925~focal adhesion,GO:0009986~cell surface,GO:0016021~integral component of membrane,GO:0070062~extracellular exosome,		IPR000436:Sushi/SCR/CCP,IPR017341:Membrane cofactor protein, CD46,	bta04610:Complement and coagulation cascades,bta05162:Measles,	PIRSF037971:membrane cofactor protein, CD46 type,	SM00032:CCP,	Alternative splicing,Coiled coil,Complement pathway,Complete proteome,Cytoplasmic vesicle,Direct protein sequencing,Disulfide bond,Fertilization,Glycoprotein,Immunity,Innate immunity,Membrane,Phosphoprotein,Reference proteome,Repeat,Signal,Sushi,Transmembrane,Transmembrane helix,	chain:Membrane cofactor protein,disulfide bond,domain:Sushi 1,domain:Sushi 2,domain:Sushi 3,domain:Sushi 4,glycosylation site:N-linked (GlcNAc...),glycosylation site:O-linked (GalNAc...),sequence conflict,signal peptide,splice variant,topological domain:Cytoplasmic,topological domain:Extracellular,transmembrane region,
G3X6M2	CD55 molecule (Cromer blood group)(CD55)	Bos taurus					IPR000436:Sushi/SCR/CCP,	bta04610:Complement and coagulation cascades,bta04640:Hematopoietic cell lineage,bta05416:Viral myocarditis,		SM00032:CCP,	Complete proteome,Disulfide bond,Reference proteome,Signal,
A7YW37	CD58 molecule(CD58)	Bos taurus		GO:0006955~immune response,GO:0034113~heterotypic cell-cell adhesion,GO:0071346~cellular response to interferon-gamma,GO:0071356~cellular response to tumor necrosis factor,GO:2000484~positive regulation of interleukin-8 secretion,	GO:0009986~cell surface,GO:0016021~integral component of membrane,GO:0070062~extracellular exosome,	GO:0005102~receptor binding,	IPR007110:Immunoglobulin-like domain,IPR013783:Immunoglobulin-like fold,IPR015714:Lymphocyte function associated antigen 3,	bta04514:Cell adhesion molecules (CAMs),bta05169:Epstein-Barr virus infection,			Complete proteome,Membrane,Reference proteome,Transmembrane,Transmembrane helix,
L8IWY0	CD59 molecule(CD59)	Bos mutus		GO:0001971~negative regulation of activation of membrane attack complex,			IPR016054:Ly-6 antigen / uPA receptor -like,IPR018363:CD59 antigen, conserved site,IPR027101:CD59 glycoprotein,	bom04610:Complement and coagulation cascades,bom04640:Hematopoietic cell lineage,		SM00134:LU,	Signal,
F1MU15	CD6 molecule(CD6)	Bos taurus		GO:0001771~immunological synapse formation,GO:0002438~acute inflammatory response to antigenic stimulus,GO:0007157~heterophilic cell-cell adhesion via plasma membrane cell adhesion molecules,GO:0031663~lipopolysaccharide-mediated signaling pathway,GO:0042102~positive regulation of T cell proliferation,GO:1900017~positive regulation of cytokine production involved in inflammatory response,	GO:0001772~immunological synapse,GO:0016021~integral component of membrane,GO:0031226~intrinsic component of plasma membrane,GO:0042101~T cell receptor complex,	GO:0001530~lipopolysaccharide binding,GO:0005044~scavenger receptor activity,GO:0070891~lipoteichoic acid binding,	IPR001190:Speract/scavenger receptor,IPR017448:Speract/scavenger receptor-related,	bta04514:Cell adhesion molecules (CAMs),		SM00202:SR,	Complete proteome,Disulfide bond,Membrane,Reference proteome,Signal,Transmembrane,Transmembrane helix,
E1BPB4	CD72 molecule(CD72)	Bos taurus			GO:0005887~integral component of plasma membrane,		IPR001304:C-type lectin,IPR016186:C-type lectin-like,IPR016187:C-type lectin fold,	bta04662:B cell receptor signaling pathway,		SM00034:CLECT,	Coiled coil,Complete proteome,Membrane,Reference proteome,Transmembrane,Transmembrane helix,
O46405	CD80 molecule(CD80)	Bos taurus		GO:0031295~T cell costimulation,GO:0046641~positive regulation of alpha-beta T cell proliferation,GO:0050731~positive regulation of peptidyl-tyrosine phosphorylation,GO:0071222~cellular response to lipopolysaccharide,	GO:0009897~external side of plasma membrane,GO:0016021~integral component of membrane,		IPR003597:Immunoglobulin C1-set,IPR003599:Immunoglobulin subtype,IPR007110:Immunoglobulin-like domain,IPR013106:Immunoglobulin V-set,IPR013162:CD80-like, immunoglobulin C2-set,IPR013783:Immunoglobulin-like fold,	bta04514:Cell adhesion molecules (CAMs),bta04620:Toll-like receptor signaling pathway,bta04672:Intestinal immune network for IgA production,bta04940:Type I diabetes mellitus,bta05320:Autoimmune thyroid disease,bta05322:Systemic lupus erythematosus,bta05323:Rheumatoid arthritis,bta05330:Allograft rejection,bta05332:Graft-versus-host disease,bta05416:Viral myocarditis,		SM00407:IGc1,SM00409:IG,	Complete proteome,Disulfide bond,Membrane,Reference proteome,Transmembrane,Transmembrane helix,
A5D7E6	CD82 molecule(CD82)	Bos taurus		GO:0007166~cell surface receptor signaling pathway,	GO:0005887~integral component of plasma membrane,GO:0070062~extracellular exosome,		IPR000301:Tetraspanin,IPR008952:Tetraspanin, EC2 domain,IPR018499:Tetraspanin/Peripherin,IPR018503:Tetraspanin, conserved site,	bta04115:p53 signaling pathway,	PIRSF002419:tetraspanin,		Complete proteome,Membrane,Proteomics identification,Reference proteome,Transmembrane,Transmembrane helix,
Q9GL33	CD86 molecule(CD86)	Bos taurus		GO:0034138~toll-like receptor 3 signaling pathway,GO:0042102~positive regulation of T cell proliferation,GO:0042113~B cell activation,GO:0051607~defense response to virus,GO:0071222~cellular response to lipopolysaccharide,	GO:0009897~external side of plasma membrane,GO:0016021~integral component of membrane,GO:0043231~intracellular membrane-bounded organelle,GO:0070062~extracellular exosome,		IPR003599:Immunoglobulin subtype,IPR007110:Immunoglobulin-like domain,IPR013106:Immunoglobulin V-set,IPR013783:Immunoglobulin-like fold,	bta04514:Cell adhesion molecules (CAMs),bta04620:Toll-like receptor signaling pathway,bta04672:Intestinal immune network for IgA production,bta04940:Type I diabetes mellitus,bta05202:Transcriptional misregulation in cancer,bta05320:Autoimmune thyroid disease,bta05322:Systemic lupus erythematosus,bta05323:Rheumatoid arthritis,bta05330:Allograft rejection,bta05332:Graft-versus-host disease,bta05416…		SM00406:IGv,SM00409:IG,	Complete proteome,Membrane,Reference proteome,Signal,Transmembrane,Transmembrane helix,
P31783	CD8a molecule(CD8A)	Bos taurus		GO:0002456~T cell mediated immunity,GO:0007166~cell surface receptor signaling pathway,GO:0045065~cytotoxic T cell differentiation,GO:0050850~positive regulation of calcium-mediated signaling,GO:0051607~defense response to virus,	GO:0009897~external side of plasma membrane,GO:0016021~integral component of membrane,		IPR003599:Immunoglobulin subtype,IPR007110:Immunoglobulin-like domain,IPR013106:Immunoglobulin V-set,IPR013783:Immunoglobulin-like fold,IPR015468:CD8 alpha subunit,	bta04514:Cell adhesion molecules (CAMs),bta04612:Antigen processing and presentation,bta04640:Hematopoietic cell lineage,bta04660:T cell receptor signaling pathway,bta05340:Primary immunodeficiency,		SM00406:IGv,SM00409:IG,	3D-structure,Adaptive immunity,Complete proteome,Disulfide bond,Immunity,Immunoglobulin domain,Membrane,Reference proteome,Signal,Transmembrane,Transmembrane helix,	chain:T-cell surface glycoprotein CD8 alpha chain,disulfide bond,domain:Ig-like V-type,signal peptide,topological domain:Cytoplasmic,topological domain:Extracellular,transmembrane region,
Q3MHP9	CD96 molecule(CD96)	Bos taurus		GO:0002534~cytokine production involved in inflammatory response,GO:0002728~negative regulation of natural killer cell cytokine production,GO:0007155~cell adhesion,GO:0007160~cell-matrix adhesion,GO:0032496~response to lipopolysaccharide,GO:0032689~negative regulation of interferon-gamma production,	GO:0005737~cytoplasm,GO:0005912~adherens junction,GO:0016021~integral component of membrane,		IPR003599:Immunoglobulin subtype,IPR007110:Immunoglobulin-like domain,IPR013783:Immunoglobulin-like fold,			SM00409:IG,	Cell adhesion,Complete proteome,Disulfide bond,Glycoprotein,Immunoglobulin domain,Membrane,Reference proteome,Repeat,Signal,Transmembrane,Transmembrane helix,	chain:T-cell surface protein tactile,compositionally biased region:Poly-Pro,disulfide bond,domain:Ig-like C2-type,domain:Ig-like V-type 1,domain:Ig-like V-type 2,glycosylation site:N-linked (GlcNAc...),signal peptide,topological domain:Cytoplasmic,topological domain:Extracellular,transmembrane region,
F1N596	CDC like kinase 1(CLK1)	Bos taurus		GO:0018105~peptidyl-serine phosphorylation,GO:0018107~peptidyl-threonine phosphorylation,GO:0043484~regulation of RNA splicing,GO:0046777~protein autophosphorylation,	GO:0005634~nucleus,	GO:0004674~protein serine/threonine kinase activity,GO:0004713~protein tyrosine kinase activity,GO:0005524~ATP binding,	IPR000719:Protein kinase, catalytic domain,IPR008271:Serine/threonine-protein kinase, active site,IPR011009:Protein kinase-like domain,IPR017441:Protein kinase, ATP binding site,			SM00220:S_TKc,	ATP-binding,Complete proteome,Kinase,Nucleotide-binding,Reference proteome,Serine/threonine-protein kinase,Signal,Transferase,
E1B9Q2	CDC like kinase 2(CLK2)	Bos taurus		GO:0010212~response to ionizing radiation,GO:0032526~response to retinoic acid,GO:0043484~regulation of RNA splicing,GO:0045721~negative regulation of gluconeogenesis,GO:0046777~protein autophosphorylation,	GO:0005654~nucleoplasm,	GO:0004674~protein serine/threonine kinase activity,GO:0004713~protein tyrosine kinase activity,GO:0005524~ATP binding,	IPR000719:Protein kinase, catalytic domain,IPR008271:Serine/threonine-protein kinase, active site,IPR011009:Protein kinase-like domain,IPR017441:Protein kinase, ATP binding site,			SM00220:S_TKc,	ATP-binding,Complete proteome,Kinase,Nucleotide-binding,Reference proteome,Serine/threonine-protein kinase,Transferase,
A5PKC1	CDC42 binding protein kinase alpha (DMPK-like)(CDC42BPA)	Bos taurus		GO:0016477~cell migration,GO:0031532~actin cytoskeleton reorganization,GO:0035556~intracellular signal transduction,	GO:0005622~intracellular,	GO:0004674~protein serine/threonine kinase activity,GO:0005524~ATP binding,GO:0046872~metal ion binding,	IPR002219:Protein kinase C-like, phorbol ester/diacylglycerol binding,IPR014930:Myotonic dystrophy protein kinase, coiled coil,IPR020454:Diacylglycerol/phorbol-ester binding,			SM00109:C1,	Metal-binding,Zinc,Zinc-finger,
F1MH45	CDC42 binding protein kinase alpha(CDC42BPA)	Bos taurus	DNA replication, recombination, and repair,
E1B8W0, A6QP95	CDC42 binding protein kinase gamma(CDC42BPG)	Bos taurus		GO:0031532~actin cytoskeleton reorganization,GO:0035556~intracellular signal transduction,	GO:0005622~intracellular,GO:0031252~cell leading edge,	GO:0000287~magnesium ion binding,GO:0004674~protein serine/threonine kinase activity,GO:0005524~ATP binding,GO:0046872~metal ion binding,	IPR000095:PAK-box/P21-Rho-binding,IPR000719:Protein kinase, catalytic domain,IPR000961:AGC-kinase, C-terminal,IPR001180:Citron-like,IPR001849:Pleckstrin homology domain,IPR002219:Protein kinase C-like, phorbol ester/diacylglycerol binding,IPR008271:Serine/threonine-protein kinase, active site,IPR011009:Protein kinase-like domain,IPR011993:Pleckstrin homology-like domain,IPR014930:Myotonic dystrop…			SM00036:CNH,SM00109:C1,SM00133:S_TK_X,SM00220:S_TKc,SM00233:PH,	ATP-binding,Coiled coil,Complete proteome,Kinase,Metal-binding,Nucleotide-binding,Reference proteome,Serine/threonine-protein kinase,Transferase,Zinc,Zinc-finger,
Q17QW1	CDC42 effector protein 1(CDC42EP1)	Bos taurus		GO:0007266~Rho protein signal transduction,GO:0008360~regulation of cell shape,GO:0030838~positive regulation of actin filament polymerization,GO:0031274~positive regulation of pseudopodium assembly,GO:0043547~positive regulation of GTPase activity,GO:0098609~cell-cell adhesion,	GO:0005737~cytoplasm,GO:0005794~Golgi apparatus,GO:0005886~plasma membrane,GO:0005913~cell-cell adherens junction,GO:0005925~focal adhesion,GO:0015629~actin cytoskeleton,	GO:0005096~GTPase activator activity,GO:0017049~GTP-Rho binding,GO:0098641~cadherin binding involved in cell-cell adhesion,	IPR000095:PAK-box/P21-Rho-binding,			SM00285:PBD,	Cell shape,Complete proteome,Cytoplasm,Cytoskeleton,Membrane,Methylation,Phosphoprotein,Reference proteome,Repeat,	chain:Cdc42 effector protein 1,domain:CRIB,modified residue,region of interest:4 X 7 AA tandem repeats of [PT]-[AT]-A- [ENT]-[PT]-[PTS]-[AG],repeat:1,repeat:2,repeat:3,repeat:4,
Q08DN3	CDK5 regulatory subunit associated protein 1(CDK5RAP1)	Bos taurus		GO:0045736~negative regulation of cyclin-dependent protein serine/threonine kinase activity,GO:0045859~regulation of protein kinase activity,GO:0045903~positive regulation of translational fidelity,GO:0070131~positive regulation of mitochondrial translation,GO:0070900~mitochondrial tRNA modification,	GO:0005739~mitochondrion,	GO:0016740~transferase activity,GO:0019887~protein kinase regulator activity,GO:0051536~iron-sulfur cluster binding,	IPR002792:TRAM domain,IPR005839:Methylthiotransferase,IPR006463:tRNA-i(6)A37 modification enzyme MiaB,IPR006638:Elongator protein 3/MiaB/NifB,IPR007197:Radical SAM,IPR013848:Methylthiotransferase, N-terminal,IPR020612:Methylthiotransferase, conserved site,IPR023404:Radical SAM, alpha/beta horseshoe,IPR023970:Methylthiotransferase/radical SAM-type protein,			SM00729:Elp3,	Complete proteome,Reference proteome,Signal,
F1MGF7	CDK5 regulatory subunit associated protein 2(CDK5RAP2)	Bos taurus		GO:0000132~establishment of mitotic spindle orientation,GO:0001578~microtubule bundle formation,GO:0007059~chromosome segregation,GO:0007099~centriole replication,GO:0007420~brain development,GO:0045665~negative regulation of neuron differentiation,GO:0045893~positive regulation of transcription, DNA-templated,GO:0046600~negative regulation of centriole replication,GO:0090231~regulation of spindl…	GO:0000242~pericentriolar material,GO:0005794~Golgi apparatus,GO:0030054~cell junction,GO:0035371~microtubule plus-end,GO:0048471~perinuclear region of cytoplasm,GO:0070062~extracellular exosome,GO:0097431~mitotic spindle pole,	GO:0044212~transcription regulatory region DNA binding,	IPR012943:Spindle associated,				Coiled coil,Complete proteome,Reference proteome,
Q0VCV3	CDK5 regulatory subunit associated protein 3(CDK5RAP3)	Bos taurus		GO:0000079~regulation of cyclin-dependent protein serine/threonine kinase activity,GO:0007095~mitotic G2 DNA damage checkpoint,GO:0007346~regulation of mitotic cell cycle,GO:0008283~cell proliferation,GO:0010921~regulation of phosphatase activity,GO:0030262~apoptotic nuclear changes,GO:0030968~endoplasmic reticulum unfolded protein response,GO:0031398~positive regulation of protein ubiquitination…	GO:0005634~nucleus,GO:0005737~cytoplasm,GO:0005813~centrosome,GO:0005874~microtubule,GO:0012505~endomembrane system,GO:0016020~membrane,GO:0043234~protein complex,		IPR008491:Protein of unknown function DUF773,				Complete proteome,Reference proteome,
F1MTI2	CDKN2A interacting protein(CDKN2AIP)	Bos taurus					IPR021859:Protein of unknown function DUF3469,				Complete proteome,Reference proteome,
L8IYA4	CDP-diacylglycerol--inositol 3-phosphatidyltransferase(CDIPT)	Bos mutus		GO:0008654~phospholipid biosynthetic process,	GO:0016021~integral component of membrane,	GO:0016780~phosphotransferase activity, for other substituted phosphate groups,	IPR000462:CDP-alcohol phosphatidyltransferase,IPR014387:CDP-diacylglycerol-inositol 3-phosphatidyltransferase, eukaryote,	bom00562:Inositol phosphate metabolism,bom00564:Glycerophospholipid metabolism,bom01100:Metabolic pathways,bom04070:Phosphatidylinositol signaling system,	PIRSF000848:CDP-diacylglycerol--inositol 3-phosphatidyltransferase,		Lipid biosynthesis,Lipid metabolism,Membrane,Phospholipid biosynthesis,Phospholipid metabolism,Transferase,Transmembrane,Transmembrane helix,
E1BEM3	CDV3 homolog(CDV3)	Bos taurus					IPR026806:Protein CDV3,				Complete proteome,Proteomics identification,Reference proteome,
F1N680	CKLF like MARVEL transmembrane domain containing 6(CMTM6)	Bos taurus			GO:0016021~integral component of membrane,GO:0070062~extracellular exosome,		IPR008253:Marvel,				Complete proteome,Membrane,Reference proteome,Transmembrane,Transmembrane helix,
A0JNI5	CLK4 associating serine/arginine rich protein(CLASRP)	Bos taurus		GO:0006397~mRNA processing,GO:0008380~RNA splicing,	GO:0005634~nucleus,		IPR019147:Suppressor of white apricot N-terminal domain,			SM01141:SM01141,	Coiled coil,Complete proteome,mRNA processing,mRNA splicing,Nucleus,Phosphoprotein,Reference proteome,	chain:Splicing factor, arginine/serine-rich 16,compositionally biased region:Arg-rich,compositionally biased region:Ser-rich,modified residue,
F1MVE4	CNKSR family member 3(CNKSR3)	Bos taurus		GO:0009966~regulation of signal transduction,	GO:0005737~cytoplasm,GO:0016020~membrane,		IPR001478:PDZ domain,IPR001660:Sterile alpha motif domain,IPR010599:Connector enhancer of kinase suppressor of ras 2,IPR013761:Sterile alpha motif/pointed domain,IPR017874:CRIC domain,			SM00228:PDZ,SM00454:SAM,	Complete proteome,Reference proteome,
A7YWP6	COMM domain containing 2(COMMD2)	Bos taurus					IPR017920:COMM domain,				Complete proteome,Reference proteome,
Q3SZ76	COMM domain containing 3(COMMD3)	Bos taurus		GO:0006351~transcription, DNA-templated,GO:0006355~regulation of transcription, DNA-templated,GO:0006814~sodium ion transport,	GO:0005634~nucleus,GO:0005737~cytoplasm,		IPR017920:COMM domain,				Coiled coil,Complete proteome,Cytoplasm,Ion transport,Nucleus,Reference proteome,Sodium,Sodium transport,Transcription,Transcription regulation,Transport,Ubl conjugation pathway,	chain:COMM domain-containing protein 3,domain:COMM,modified residue,
G3X736	COP9 constitutive photomorphogenic homolog subunit 2-like(LOC782101)	Bos taurus	Posttranslational modification, protein turnover, chaperones,	GO:0008283~cell proliferation,GO:0010388~cullin deneddylation,GO:0022008~neurogenesis,GO:0035914~skeletal muscle cell differentiation,GO:0045892~negative regulation of transcription, DNA-templated,	GO:0005737~cytoplasm,GO:0008180~COP9 signalosome,	GO:0003714~transcription corepressor activity,	IPR000717:Proteasome component (PCI) domain,IPR011990:Tetratricopeptide-like helical,IPR011991:Winged helix-turn-helix DNA-binding domain,			SM00088:PINT,	Complete proteome,Reference proteome,
A6H7B5	COP9 signalosome subunit 3(COPS3)	Bos taurus		GO:0001701~in utero embryonic development,GO:0006511~ubiquitin-dependent protein catabolic process,GO:0010388~cullin deneddylation,	GO:0005654~nucleoplasm,GO:0005737~cytoplasm,GO:0008180~COP9 signalosome,		IPR000717:Proteasome component (PCI) domain,IPR011991:Winged helix-turn-helix DNA-binding domain,			SM00088:PINT,	Acetylation,Complete proteome,Cytoplasm,Nucleus,Phosphoprotein,Reference proteome,Signalosome,	chain:COP9 signalosome complex subunit 3,domain:PCI,modified residue,
Q3SZA0	COP9 signalosome subunit 4(COPS4)	Bos taurus		GO:0000338~protein deneddylation,GO:0010388~cullin deneddylation,	GO:0005654~nucleoplasm,GO:0005829~cytosol,GO:0008021~synaptic vesicle,GO:0008180~COP9 signalosome,GO:0030054~cell junction,GO:0070062~extracellular exosome,	GO:0019784~NEDD8-specific protease activity,	IPR000717:Proteasome component (PCI) domain,IPR011991:Winged helix-turn-helix DNA-binding domain,			SM00088:PINT,	Acetylation,Cell junction,Complete proteome,Cytoplasm,Cytoplasmic vesicle,Nucleus,Reference proteome,Signalosome,Synapse,	chain:COP9 signalosome complex subunit 4,domain:PCI,modified residue,
F1MBP8	COP9 signalosome subunit 5(COPS5)	Bos taurus		GO:0010388~cullin deneddylation,GO:0016579~protein deubiquitination,GO:0045944~positive regulation of transcription from RNA polymerase II promoter,GO:0046328~regulation of JNK cascade,GO:0051726~regulation of cell cycle,GO:1903894~regulation of IRE1-mediated unfolded protein response,GO:1990182~exosomal secretion,	GO:0005654~nucleoplasm,GO:0008021~synaptic vesicle,GO:0008180~COP9 signalosome,	GO:0004843~thiol-dependent ubiquitin-specific protease activity,GO:0008237~metallopeptidase activity,	IPR000555:JAB1/Mov34/MPN/PAD-1,			SM00232:JAB_MPN,	Complete proteome,Reference proteome,
A7Z040	COP9 signalosome subunit 7A(COPS7A)	Bos taurus		GO:0010388~cullin deneddylation,	GO:0005654~nucleoplasm,GO:0005737~cytoplasm,GO:0008180~COP9 signalosome,		IPR000717:Proteasome component (PCI) domain,			SM00088:PINT,	Coiled coil,Complete proteome,Reference proteome,
A4FV74	COP9 signalosome subunit 8(COPS8)	Bos taurus		GO:0007250~activation of NF-kappaB-inducing kinase activity,GO:0008285~negative regulation of cell proliferation,GO:0010387~COP9 signalosome assembly,GO:0010388~cullin deneddylation,	GO:0005654~nucleoplasm,GO:0008180~COP9 signalosome,GO:0048471~perinuclear region of cytoplasm,GO:0070062~extracellular exosome,						Complete proteome,Reference proteome,
A3KMZ6	COX11 cytochrome c oxidase assembly homolog (yeast)(COX11)	Bos taurus		GO:0008535~respiratory chain complex IV assembly,GO:0009060~aerobic respiration,GO:0033132~negative regulation of glucokinase activity,	GO:0005739~mitochondrion,GO:0005743~mitochondrial inner membrane,GO:0016021~integral component of membrane,	GO:0005507~copper ion binding,	IPR007533:Cytochrome c oxidase assembly protein CtaG/Cox11,IPR023471:Cytochrome c oxidase assembly protein CtaG/Cox11, domain,	bta00190:Oxidative phosphorylation,bta01100:Metabolic pathways,			Complete proteome,Copper,Membrane,Mitochondrion,Mitochondrion inner membrane,Reference proteome,Transit peptide,Transmembrane,Transmembrane helix,	chain:Cytochrome c oxidase assembly protein COX11, mitochondrial,topological domain:Mitochondrial intermembrane,topological domain:Mitochondrial matrix,transit peptide:Mitochondrion,transmembrane region,
F1MD32	CREB binding protein(CREBBP)	Bos taurus		GO:0018076~N-terminal peptidyl-lysine acetylation,GO:0034644~cellular response to UV,GO:0045893~positive regulation of transcription, DNA-templated,	GO:0000123~histone acetyltransferase complex,GO:0000790~nuclear chromatin,GO:0005737~cytoplasm,GO:0016604~nuclear body,	GO:0000987~core promoter proximal region sequence-specific DNA binding,GO:0001078~transcriptional repressor activity, RNA polymerase II core promoter proximal region sequence-specific binding,GO:0001191~transcriptional repressor activity, RNA polymerase II transcription factor binding,GO:0003682~chromatin binding,GO:0003684~damaged DNA binding,GO:0003713~transcription coactivator activity,GO:0004…	IPR000197:Zinc finger, TAZ-type,IPR000433:Zinc finger, ZZ-type,IPR001487:Bromodomain,IPR003101:Coactivator CBP, KIX domain,IPR009110:Nuclear receptor coactivator, interlocking,IPR010303:Domain of unknown function DUF902, CREBbp,IPR013178:Histone H3-K56 acetyltransferase, RTT109,IPR014744:Nuclear receptor coactivator, CREB-bp-like, interlocking,IPR018359:Bromodomain, conserved site,	bta04024:cAMP signaling pathway,bta04066:HIF-1 signaling pathway,bta04068:FoxO signaling pathway,bta04110:Cell cycle,bta04310:Wnt signaling pathway,bta04330:Notch signaling pathway,bta04350:TGF-beta signaling pathway,bta04520:Adherens junction,bta04630:Jak-STAT signaling pathway,bta04720:Long-term potentiation,bta04916:Melanogenesis,bta04919:Thyroid hormone signaling pathway,bta04922:Glucagon sig…		SM00291:ZnF_ZZ,SM00297:BROMO,SM00551:ZnF_TAZ,SM01250:SM01250,	Acyltransferase,Bromodomain,Coiled coil,Complete proteome,Metal-binding,Reference proteome,Transferase,Zinc,Zinc-finger,
A5PJU1	CREB/ATF bZIP transcription factor(CREBZF)	Bos taurus		GO:0006351~transcription, DNA-templated,GO:0009615~response to virus,GO:0045814~negative regulation of gene expression, epigenetic,GO:0045892~negative regulation of transcription, DNA-templated,GO:0051090~regulation of sequence-specific DNA binding transcription factor activity,	GO:0005634~nucleus,	GO:0003700~transcription factor activity, sequence-specific DNA binding,GO:0043565~sequence-specific DNA binding,	IPR004827:Basic-leucine zipper domain,				Coiled coil,Complete proteome,Reference proteome,
E1BPS0	CREB3 regulatory factor(CREBRF)	Bos taurus		GO:0042711~maternal behavior,GO:1900170~negative regulation of glucocorticoid mediated signaling pathway,GO:1902213~positive regulation of prolactin signaling pathway,	GO:0005737~cytoplasm,GO:0016604~nuclear body,	GO:0003700~transcription factor activity, sequence-specific DNA binding,GO:0043565~sequence-specific DNA binding,	IPR004827:Basic-leucine zipper domain,				Coiled coil,Complete proteome,Reference proteome,
E1BDX1	CST telomere replication complex component 1(CTC1)	Bos taurus		GO:0006974~cellular response to DNA damage stimulus,GO:0010389~regulation of G2/M transition of mitotic cell cycle,GO:0010833~telomere maintenance via telomere lengthening,GO:0035264~multicellular organism growth,GO:0045740~positive regulation of DNA replication,GO:0048146~positive regulation of fibroblast proliferation,GO:0048536~spleen development,GO:0048538~thymus development,GO:0048539~bone m…	GO:1990879~CST complex,	GO:0003697~single-stranded DNA binding,GO:0010521~telomerase inhibitor activity,GO:0042162~telomeric DNA binding,GO:0098505~G-rich strand telomeric DNA binding,					Complete proteome,Reference proteome,
F1MDR5	CTAGE family member 5, ER export factor(CTAGE5)	Bos taurus			GO:0016021~integral component of membrane,						Coiled coil,Complete proteome,Membrane,Reference proteome,Transmembrane,Transmembrane helix,
E1B8W1	CTD small phosphatase like 2(CTDSPL2)	Bos taurus		GO:0030514~negative regulation of BMP signaling pathway,GO:0046827~positive regulation of protein export from nucleus,	GO:0005654~nucleoplasm,	GO:0004721~phosphoprotein phosphatase activity,	IPR004274:NLI interacting factor,IPR011948:Dullard phosphatase domain, eukaryotic,IPR023214:HAD-like domain,			SM00577:CPDc,	Complete proteome,Reference proteome,
A0JNE9	CTP synthase 1(CTPS1)	Bos taurus		GO:0006541~glutamine metabolic process,GO:0042098~T cell proliferation,GO:0042100~B cell proliferation,GO:0044210~'de novo' CTP biosynthetic process,	GO:0016020~membrane,	GO:0003883~CTP synthase activity,GO:0005524~ATP binding,	IPR004468:CTP synthase,IPR017456:CTP synthase, N-terminal,IPR017926:Glutamine amidotransferase,IPR027417:P-loop containing nucleoside triphosphate hydrolase,	bta00240:Pyrimidine metabolism,bta01100:Metabolic pathways,			ATP-binding,Complete proteome,Glutamine amidotransferase,Ligase,Nucleotide-binding,Pyrimidine biosynthesis,Reference proteome,
Q1RMS2	CTP synthase 2(CTPS2)	Bos taurus		GO:0006541~glutamine metabolic process,GO:0044210~'de novo' CTP biosynthetic process,	GO:0005739~mitochondrion,	GO:0003883~CTP synthase activity,GO:0005524~ATP binding,	IPR004468:CTP synthase,IPR017456:CTP synthase, N-terminal,IPR017926:Glutamine amidotransferase,IPR027417:P-loop containing nucleoside triphosphate hydrolase,	bta00240:Pyrimidine metabolism,bta01100:Metabolic pathways,			ATP-binding,Complete proteome,Glutamine amidotransferase,Ligase,Nucleotide-binding,Phosphoprotein,Pyrimidine biosynthesis,Reference proteome,	active site:For GATase activity,chain:CTP synthase 2,domain:Glutamine amidotransferase type-1,modified residue,
F1N4V2	CTR9 homolog, Paf1/RNA polymerase II complex component(CTR9)	Bos taurus		GO:0000122~negative regulation of transcription from RNA polymerase II promoter,GO:0001711~endodermal cell fate commitment,GO:0001826~inner cell mass cell differentiation,GO:0001829~trophectodermal cell differentiation,GO:0001832~blastocyst growth,GO:0006355~regulation of transcription, DNA-templated,GO:0007259~JAK-STAT cascade,GO:0010390~histone monoubiquitination,GO:0016570~histone modification…	GO:0016593~Cdc73/Paf1 complex,GO:0035327~transcriptionally active chromatin,	GO:0000993~RNA polymerase II core binding,	IPR011990:Tetratricopeptide-like helical,IPR013026:Tetratricopeptide repeat-containing domain,IPR019734:Tetratricopeptide repeat,			SM00028:TPR,	Coiled coil,Complete proteome,Reference proteome,
F1MUH9	CTTNBP2 N-terminal like(CTTNBP2NL)	Bos taurus		GO:0006470~protein dephosphorylation,GO:0032410~negative regulation of transporter activity,GO:0034763~negative regulation of transmembrane transport,	GO:0015629~actin cytoskeleton,		IPR019131:Cortactin-binding protein-2, N-terminal,				Coiled coil,Complete proteome,Reference proteome,
F1MRN5	CUB and Sushi multiple domains 1(CSMD1)	Bos taurus		GO:0001964~startle response,GO:0042593~glucose homeostasis,	GO:0016021~integral component of membrane,		IPR000436:Sushi/SCR/CCP,IPR000859:CUB domain,			SM00032:CCP,SM00042:CUB,	Complete proteome,Disulfide bond,Membrane,Reference proteome,Transmembrane,Transmembrane helix,
G3N093	CUB domain containing protein 1(CDCP1)	Bos taurus			GO:0016021~integral component of membrane,						Complete proteome,Membrane,Reference proteome,Signal,Transmembrane,Transmembrane helix,
A5PKL5	CUE domain containing 1(CUEDC1)	Bos taurus					IPR003892:Ubiquitin system component Cue,IPR009060:UBA-like,			SM00546:CUE,	Complete proteome,Reference proteome,
F1MER3	CWC25 spliceosome associated protein homolog(CWC25)	Bos taurus			GO:0005654~nucleoplasm,		IPR019339:CBF1-interacting co-repressor CIR, N-terminal domain,IPR022209:Pre-mRNA splicing factor,			SM01083:SM01083,	Coiled coil,Complete proteome,Reference proteome,
F1MR62	CWF19-like 2, cell cycle control (S. pombe)(CWF19L2)	Bos taurus				GO:0003824~catalytic activity,	IPR006767:Cwf19-like protein, C-terminal domain-2,IPR006768:Cwf19-like, C-terminal domain-1,IPR011146:HIT-like domain,				Coiled coil,Complete proteome,Reference proteome,
Q5EA28	CXXC finger protein 1(CXXC1)	Bos taurus		GO:0006351~transcription, DNA-templated,GO:0045893~positive regulation of transcription, DNA-templated,GO:0051568~histone H3-K4 methylation,	GO:0005737~cytoplasm,GO:0016363~nuclear matrix,GO:0016607~nuclear speck,GO:0048188~Set1C/COMPASS complex,	GO:0008270~zinc ion binding,GO:0042800~histone methyltransferase activity (H3-K4 specific),GO:0045322~unmethylated CpG binding,	IPR001965:Zinc finger, PHD-type,IPR002857:Zinc finger, CXXC-type,IPR011011:Zinc finger, FYVE/PHD-type,IPR013083:Zinc finger, RING/FYVE/PHD-type,IPR019786:Zinc finger, PHD-type, conserved site,IPR019787:Zinc finger, PHD-finger,IPR022056:CpG binding protein, C-terminal,			SM00249:PHD,	Acetylation,Activator,Coiled coil,Complete proteome,DNA-binding,Isopeptide bond,Metal-binding,Nucleus,Phosphoprotein,Reference proteome,Transcription,Transcription regulation,Ubl conjugation,Zinc,Zinc-finger,	chain:CpG-binding protein,compositionally biased region:Arg/Lys-rich (basic),compositionally biased region:Asp/Glu-rich (acidic),modified residue,zinc finger region:CXXC-type,zinc finger region:PHD-type,
Q1RMU2	CYLD lysine 63 deubiquitinase(CYLD)	Bos taurus		GO:0006511~ubiquitin-dependent protein catabolic process,GO:0007346~regulation of mitotic cell cycle,GO:0010803~regulation of tumor necrosis factor-mediated signaling pathway,GO:0016055~Wnt signaling pathway,GO:0032088~negative regulation of NF-kappaB transcription factor activity,GO:0042347~negative regulation of NF-kappaB import into nucleus,GO:0045087~innate immune response,GO:0070266~necropto…	GO:0005813~centrosome,GO:0005819~spindle,GO:0005829~cytosol,GO:0005881~cytoplasmic microtubule,GO:0030496~midbody,GO:0031234~extrinsic component of cytoplasmic side of plasma membrane,GO:0036064~ciliary basal body,GO:0048471~perinuclear region of cytoplasm,GO:0097542~ciliary tip,	GO:0004843~thiol-dependent ubiquitin-specific protease activity,GO:0008270~zinc ion binding,GO:0019901~protein kinase binding,GO:0061578~Lys63-specific deubiquitinase activity,GO:0070064~proline-rich region binding,	IPR000938:CAP Gly-rich domain,IPR001394:Peptidase C19, ubiquitin carboxyl-terminal hydrolase 2,IPR018200:Peptidase C19, ubiquitin carboxyl-terminal hydrolase 2, conserved site,	bta04380:Osteoclast differentiation,bta04622:RIG-I-like receptor signaling pathway,		SM01052:SM01052,	Cell membrane,Cell projection,Complete proteome,Cytoplasm,Cytoskeleton,Hydrolase,Immunity,Innate immunity,Membrane,Metal-binding,Microtubule,Phosphoprotein,Protease,Reference proteome,Repeat,Thiol protease,Ubl conjugation pathway,Wnt signaling pathway,Zinc,	chain:Probable ubiquitin carboxyl-terminal hydrolase CYLD,domain:CAP-Gly 1,domain:CAP-Gly 2,modified residue,region of interest:Interaction with NEMO,region of interest:Interaction with TRAF2,region of interest:Interaction with TRIP,
L8ISD3	CaM kinase like vesicle associated(CAMKV)	Bos mutus				GO:0004672~protein kinase activity,GO:0005524~ATP binding,	IPR000719:Protein kinase, catalytic domain,IPR011009:Protein kinase-like domain,IPR020636:Calcium/calmodulin-dependent/calcium-dependent protein kinase,				Kinase,Transferase,
F1N289	Cas scaffolding protein family member 4(CASS4)	Bos taurus					IPR001452:Src homology-3 domain,IPR014928:Serine rich protein interaction,IPR021901:CAS family, DUF3513,			SM00326:SH3,	Complete proteome,Reference proteome,
F1N510	Cbl proto-oncogene B(CBLB)	Bos taurus		GO:0006508~proteolysis,GO:0007166~cell surface receptor signaling pathway,GO:0007173~epidermal growth factor receptor signaling pathway,GO:0007175~negative regulation of epidermal growth factor-activated receptor activity,GO:0023051~regulation of signaling,	GO:0005634~nucleus,GO:0005654~nucleoplasm,GO:0005737~cytoplasm,GO:0005886~plasma membrane,GO:0045121~membrane raft,	GO:0004842~ubiquitin-protein transferase activity,GO:0004871~signal transducer activity,GO:0005509~calcium ion binding,GO:0008270~zinc ion binding,GO:0017124~SH3 domain binding,GO:0030971~receptor tyrosine kinase binding,GO:0061630~ubiquitin protein ligase activity,	IPR000980:SH2 domain,IPR001841:Zinc finger, RING-type,IPR003153:Adaptor protein Cbl, N-terminal helical,IPR011992:EF-hand-like domain,IPR013083:Zinc finger, RING/FYVE/PHD-type,IPR014741:Adaptor protein Cbl, EF hand-like,IPR014742:Adaptor protein Cbl, SH2-like,IPR015940:Ubiquitin-associated/translation elongation factor EF1B, N-terminal, eukaryote,IPR017907:Zinc finger, RING-type, conserved site,I…	bta04012:ErbB signaling pathway,bta04120:Ubiquitin mediated proteolysis,bta04144:Endocytosis,bta04660:T cell receptor signaling pathway,bta04910:Insulin signaling pathway,bta05100:Bacterial invasion of epithelial cells,bta05200:Pathways in cancer,bta05205:Proteoglycans in cancer,bta05220:Chronic myeloid leukemia,		SM00165:UBA,SM00184:RING,	Complete proteome,Reference proteome,Signal,
F1MEB7	Cbl proto-oncogene like 1(CBLL1)	Bos taurus		GO:0007162~negative regulation of cell adhesion,GO:0016337~single organismal cell-cell adhesion,GO:0030155~regulation of cell adhesion,GO:0030335~positive regulation of cell migration,GO:0045807~positive regulation of endocytosis,		GO:0003676~nucleic acid binding,GO:0008270~zinc ion binding,GO:0061630~ubiquitin protein ligase activity,	IPR001841:Zinc finger, RING-type,IPR013083:Zinc finger, RING/FYVE/PHD-type,IPR017907:Zinc finger, RING-type, conserved site,				Complete proteome,Reference proteome,
E1BJS3	Cbl proto-oncogene(CBL)	Bos taurus		GO:0006508~proteolysis,GO:0007173~epidermal growth factor receptor signaling pathway,GO:0007175~negative regulation of epidermal growth factor-activated receptor activity,GO:0014068~positive regulation of phosphatidylinositol 3-kinase signaling,GO:0042787~protein ubiquitination involved in ubiquitin-dependent protein catabolic process,GO:0043066~negative regulation of apoptotic process,GO:0048260…	GO:0005634~nucleus,GO:0005737~cytoplasm,GO:0005886~plasma membrane,GO:0016600~flotillin complex,GO:0045121~membrane raft,	GO:0004871~signal transducer activity,GO:0005509~calcium ion binding,GO:0008270~zinc ion binding,GO:0017124~SH3 domain binding,GO:0030971~receptor tyrosine kinase binding,GO:0061630~ubiquitin protein ligase activity,	IPR000980:SH2 domain,IPR001841:Zinc finger, RING-type,IPR003153:Adaptor protein Cbl, N-terminal helical,IPR009060:UBA-like,IPR011992:EF-hand-like domain,IPR013083:Zinc finger, RING/FYVE/PHD-type,IPR014741:Adaptor protein Cbl, EF hand-like,IPR014742:Adaptor protein Cbl, SH2-like,IPR015940:Ubiquitin-associated/translation elongation factor EF1B, N-terminal, eukaryote,IPR017907:Zinc finger, RING-typ…	bta04012:ErbB signaling pathway,bta04120:Ubiquitin mediated proteolysis,bta04144:Endocytosis,bta04660:T cell receptor signaling pathway,bta04910:Insulin signaling pathway,bta05100:Bacterial invasion of epithelial cells,bta05200:Pathways in cancer,bta05205:Proteoglycans in cancer,bta05220:Chronic myeloid leukemia,		SM00165:UBA,SM00184:RING,	Complete proteome,Reference proteome,
Q58DL7	Cdc42 guanine nucleotide exchange factor 9(ARHGEF9)	Bos taurus		GO:0035023~regulation of Rho protein signal transduction,GO:0043547~positive regulation of GTPase activity,	GO:0005737~cytoplasm,	GO:0005089~Rho guanyl-nucleotide exchange factor activity,	IPR000219:Dbl homology (DH) domain,IPR001452:Src homology-3 domain,IPR001849:Pleckstrin homology domain,IPR011993:Pleckstrin homology-like domain,			SM00233:PH,SM00325:RhoGEF,SM00326:SH3,	Complete proteome,Cytoplasm,Guanine-nucleotide releasing factor,Phosphoprotein,Reference proteome,SH3 domain,	chain:Rho guanine nucleotide exchange factor 9,domain:DH,domain:PH,domain:SH3,region of interest:Interaction with GPHN,
F1MZY0	Cdk5 and Abl enzyme substrate 1(CABLES1)	Bos taurus		GO:0051726~regulation of cell cycle,	GO:0005829~cytosol,		IPR006671:Cyclin, N-terminal,IPR012388:Cdk5/c-Abl linker protein Cables,IPR013763:Cyclin-like,				Complete proteome,Reference proteome,
Q0IIH4	ChaC cation transport regulator homolog 2(CHAC2)	Bos taurus		GO:0006751~glutathione catabolic process,		GO:0003839~gamma-glutamylcyclotransferase activity,	IPR006840:ChaC-like protein,IPR013024:Butirosin biosynthesis, BtrG-like,				Acyltransferase,Complete proteome,Reference proteome,Transferase,	chain:Cation transport regulator-like protein 2,
Q5E9N5	ClpB homolog, mitochondrial AAA ATPase chaperonin(CLPB)	Bos taurus		GO:0034605~cellular response to heat,	GO:0005739~mitochondrion,	GO:0005524~ATP binding,GO:0016887~ATPase activity,	IPR001270:Chaperonin ClpA/B,IPR002110:Ankyrin repeat,IPR003593:AAA+ ATPase domain,IPR003959:ATPase, AAA-type, core,IPR019489:Clp ATPase, C-terminal,IPR020683:Ankyrin repeat-containing domain,IPR027417:P-loop containing nucleoside triphosphate hydrolase,			SM00248:ANK,SM00382:AAA,SM01086:SM01086,	Acetylation,ANK repeat,ATP-binding,Complete proteome,Hydrolase,Mitochondrion,Nucleotide-binding,Reference proteome,Repeat,Transit peptide,	chain:Caseinolytic peptidase B protein homolog,modified residue,nucleotide phosphate-binding region:ATP,repeat:ANK 1,repeat:ANK 2,repeat:ANK 3,repeat:ANK 4,
E1BEL9	Coenzyme A synthase(COASY)	Bos taurus	Coenzyme metabolism,	GO:0015937~coenzyme A biosynthetic process,	GO:0005654~nucleoplasm,GO:0005759~mitochondrial matrix,GO:0070062~extracellular exosome,	GO:0004140~dephospho-CoA kinase activity,GO:0004595~pantetheine-phosphate adenylyltransferase activity,GO:0005524~ATP binding,	IPR001977:Dephospho-CoA kinase,IPR004821:Cytidyltransferase-like domain,IPR014729:Rossmann-like alpha/beta/alpha sandwich fold,IPR027417:P-loop containing nucleoside triphosphate hydrolase,	bta00770:Pantothenate and CoA biosynthesis,bta01100:Metabolic pathways,			Complete proteome,Reference proteome,Signal,
E1BB77	DAB2 interacting protein(DAB2IP)	Bos taurus	Cell division and chromosome partitioning,	GO:0000122~negative regulation of transcription from RNA polymerase II promoter,GO:0000185~activation of MAPKKK activity,GO:0007252~I-kappaB phosphorylation,GO:0007257~activation of JUN kinase activity,GO:0008625~extrinsic apoptotic signaling pathway via death domain receptors,GO:0010596~negative regulation of endothelial cell migration,GO:0010719~negative regulation of epithelial to mesenchymal …	GO:0005737~cytoplasm,GO:0030139~endocytic vesicle,GO:0031235~intrinsic component of the cytoplasmic side of the plasma membrane,GO:0032809~neuronal cell body membrane,GO:0044300~cerebellar mossy fiber,GO:0044301~climbing fiber,GO:0070062~extracellular exosome,GO:1990032~parallel fiber,GO:1990597~AIP1-IRE1 complex,	GO:0005096~GTPase activator activity,GO:0032266~phosphatidylinositol-3-phosphate binding,GO:0035591~signaling adaptor activity,GO:0070273~phosphatidylinositol-4-phosphate binding,	IPR000008:C2 calcium-dependent membrane targeting,IPR001849:Pleckstrin homology domain,IPR001936:Ras GTPase-activating protein,IPR008936:Rho GTPase activation protein,IPR011993:Pleckstrin homology-like domain,IPR021887:Protein of unknown function DUF3498,IPR023152:Ras GTPase-activating protein, conserved site,			SM00233:PH,SM00239:C2,SM00323:RasGAP,	Coiled coil,Complete proteome,GTPase activation,Reference proteome,
F1N371	DAB2, clathrin adaptor protein(DAB2)	Bos taurus		GO:0010718~positive regulation of epithelial to mesenchymal transition,GO:0010862~positive regulation of pathway-restricted SMAD protein phosphorylation,GO:0030335~positive regulation of cell migration,GO:0030511~positive regulation of transforming growth factor beta receptor signaling pathway,GO:0032091~negative regulation of protein binding,GO:0032436~positive regulation of proteasomal ubiquiti…	GO:0005730~nucleolus,GO:0005905~clathrin-coated pit,GO:0005925~focal adhesion,GO:0030136~clathrin-coated vesicle,GO:0070022~transforming growth factor beta receptor homodimeric complex,GO:0070062~extracellular exosome,	GO:0038024~cargo receptor activity,	IPR006020:Phosphotyrosine interaction domain,IPR011993:Pleckstrin homology-like domain,	bta04144:Endocytosis,		SM00462:PTB,	Coiled coil,Complete proteome,Reference proteome,
E1BAK6	DAZ associated protein 1(DAZAP1)	Bos taurus		GO:0001893~maternal placenta development,GO:0007283~spermatogenesis,GO:0008283~cell proliferation,GO:0048026~positive regulation of mRNA splicing, via spliceosome,	GO:0005654~nucleoplasm,GO:0005737~cytoplasm,	GO:0000166~nucleotide binding,GO:0035613~RNA stem-loop binding,GO:0044822~poly(A) RNA binding,	IPR000504:RNA recognition motif domain,IPR012677:Nucleotide-binding, alpha-beta plait,	bta03015:mRNA surveillance pathway,		SM00360:RRM,	Complete proteome,Reference proteome,
E1BCW4	DBF4 zinc finger(DBF4)	Bos taurus			GO:0005634~nucleus,	GO:0003676~nucleic acid binding,GO:0008270~zinc ion binding,	IPR001357:BRCT domain,IPR006572:Zinc finger, DBF-type,	bta04110:Cell cycle,		SM00586:ZnF_DBF,	Complete proteome,Reference proteome,
E1BDV4	DDB1 and CUL4 associated factor 1(DCAF1)	Bos taurus		GO:0000122~negative regulation of transcription from RNA polymerase II promoter,GO:0016567~protein ubiquitination,GO:0030183~B cell differentiation,GO:0033151~V(D)J recombination,GO:0035212~cell competition in a multicellular organism,	GO:0005730~nucleolus,GO:0008180~COP9 signalosome,	GO:1990244~histone kinase activity (H2A-T120 specific),	IPR006594:LisH dimerisation motif,IPR011989:Armadillo-like helical,IPR015943:WD40/YVTN repeat-like-containing domain,IPR016024:Armadillo-type fold,IPR017986:WD40-repeat-containing domain,			SM00667:LisH,	Coiled coil,Complete proteome,Reference proteome,
Q5E9I8	DDB1 and CUL4 associated factor 11(DCAF11)	Bos taurus		GO:0016567~protein ubiquitination,	GO:0005654~nucleoplasm,GO:0080008~Cul4-RING E3 ubiquitin ligase complex,		IPR001680:WD40 repeat,IPR015943:WD40/YVTN repeat-like-containing domain,IPR017399:WD repeat protein 23,IPR017986:WD40-repeat-containing domain,IPR020472:G-protein beta WD-40 repeat,		PIRSF038135:WD repeat protein 23 ,	SM00320:WD40,	Complete proteome,Phosphoprotein,Reference proteome,Repeat,Ubl conjugation pathway,WD repeat,	chain:DDB1- and CUL4-associated factor 11,modified residue,repeat:WD 1,repeat:WD 2,repeat:WD 3,repeat:WD 4,repeat:WD 5,repeat:WD 6,repeat:WD 7,
Q3SZD5	DDB1 and CUL4 associated factor 15(DCAF15)	Bos taurus		GO:0016567~protein ubiquitination,							Complete proteome,Phosphoprotein,Reference proteome,Ubl conjugation pathway,	chain:DDB1- and CUL4-associated factor 15,modified residue,
F1N0J7	DDB1 and CUL4 associated factor 5(DCAF5)	Bos taurus			GO:0005739~mitochondrion,GO:0080008~Cul4-RING E3 ubiquitin ligase complex,		IPR001680:WD40 repeat,IPR015943:WD40/YVTN repeat-like-containing domain,IPR017986:WD40-repeat-containing domain,			SM00320:WD40,	Complete proteome,Reference proteome,
F1MBJ1	DDB1 and CUL4 associated factor 6(DCAF6)	Bos taurus		GO:0045944~positive regulation of transcription from RNA polymerase II promoter,	GO:0005634~nucleus,GO:0005737~cytoplasm,GO:0005925~focal adhesion,GO:0080008~Cul4-RING E3 ubiquitin ligase complex,	GO:0030374~ligand-dependent nuclear receptor transcription coactivator activity,	IPR000048:IQ motif, EF-hand binding site,IPR001680:WD40 repeat,IPR015943:WD40/YVTN repeat-like-containing domain,IPR017986:WD40-repeat-containing domain,			SM00320:WD40,	Complete proteome,Reference proteome,
F1N3H0	DDB1 and CUL4 associated factor 8(DCAF8)	Bos taurus					IPR001680:WD40 repeat,IPR015943:WD40/YVTN repeat-like-containing domain,IPR017986:WD40-repeat-containing domain,			SM00320:WD40,	Complete proteome,Reference proteome,
F1MSS2	DDHD domain containing 2(DDHD2)	Bos taurus		GO:0006888~ER to Golgi vesicle-mediated transport,GO:0007626~locomotory behavior,GO:0008542~visual learning,GO:0019433~triglyceride catabolic process,GO:0034389~lipid particle organization,GO:0090141~positive regulation of mitochondrial fission,	GO:0005815~microtubule organizing center,GO:0016020~membrane,GO:0030134~ER to Golgi transport vesicle,	GO:0004620~phospholipase activity,GO:0004806~triglyceride lipase activity,GO:0046872~metal ion binding,	IPR001660:Sterile alpha motif domain,IPR004170:WWE domain,IPR004177:DDHD,IPR013761:Sterile alpha motif/pointed domain,			SM00454:SAM,SM01127:SM01127,	Complete proteome,Reference proteome,
F1MUT6	DEAD (Asp-Glu-Ala-As) box polypeptide 19B(DDX19B)	Bos taurus		GO:0006406~mRNA export from nucleus,GO:0010501~RNA secondary structure unwinding,	GO:0005622~intracellular,	GO:0003676~nucleic acid binding,GO:0004004~ATP-dependent RNA helicase activity,GO:0005524~ATP binding,	IPR001650:Helicase, C-terminal,IPR011545:DNA/RNA helicase, DEAD/DEAH box type, N-terminal,IPR014001:Helicase, superfamily 1/2, ATP-binding domain,IPR014014:RNA helicase, DEAD-box type, Q motif,IPR027417:P-loop containing nucleoside triphosphate hydrolase,			SM00487:DEXDc,SM00490:HELICc,	Complete proteome,Reference proteome,
Q0IIK5	DEAD-box helicase 1(DDX1)	Bos taurus		GO:0006302~double-strand break repair,GO:0006351~transcription, DNA-templated,GO:0006355~regulation of transcription, DNA-templated,GO:0006388~tRNA splicing, via endonucleolytic cleavage and ligation,GO:0006397~mRNA processing,GO:0007275~multicellular organism development,GO:0009615~response to virus,GO:0010501~RNA secondary structure unwinding,GO:0032508~DNA duplex unwinding,GO:0043330~response …	GO:0005634~nucleus,GO:0005737~cytoplasm,GO:0010494~cytoplasmic stress granule,GO:0016020~membrane,GO:0071920~cleavage body,GO:0072669~tRNA-splicing ligase complex,	GO:0003676~nucleic acid binding,GO:0003677~DNA binding,GO:0003682~chromatin binding,GO:0003712~transcription cofactor activity,GO:0003725~double-stranded RNA binding,GO:0004004~ATP-dependent RNA helicase activity,GO:0004518~nuclease activity,GO:0004527~exonuclease activity,GO:0005524~ATP binding,GO:0008026~ATP-dependent helicase activity,GO:0008143~poly(A) binding,GO:0033677~DNA/RNA helicase acti…	IPR001650:Helicase, C-terminal,IPR001870:B30.2/SPRY domain,IPR003877:SPla/RYanodine receptor SPRY,IPR011545:DNA/RNA helicase, DEAD/DEAH box type, N-terminal,IPR013320:Concanavalin A-like lectin/glucanase, subgroup,IPR014001:Helicase, superfamily 1/2, ATP-binding domain,IPR014014:RNA helicase, DEAD-box type, Q motif,IPR027417:P-loop containing nucleoside triphosphate hydrolase,			SM00449:SPRY,SM00487:DEXDc,SM00490:HELICc,	Acetylation,Activator,ATP-binding,Complete proteome,Cytoplasm,DNA-binding,Exonuclease,Helicase,Hydrolase,mRNA processing,Nuclease,Nucleotide-binding,Nucleus,Phosphoprotein,Reference proteome,RNA-binding,Transcription,Transcription regulation,tRNA processing,	chain:ATP-dependent RNA helicase DDX1,domain:B30.2/SPRY,domain:Helicase ATP-binding,domain:Helicase C-terminal,modified residue,nucleotide phosphate-binding region:ATP,short sequence motif:DEAD box,
A7E307	DEAD-box helicase 17(DDX17)	Bos taurus		GO:0010501~RNA secondary structure unwinding,GO:0045893~positive regulation of transcription, DNA-templated,		GO:0003676~nucleic acid binding,GO:0004004~ATP-dependent RNA helicase activity,GO:0004386~helicase activity,GO:0005524~ATP binding,	IPR000629:RNA helicase, ATP-dependent, DEAD-box, conserved site,IPR001650:Helicase, C-terminal,IPR011545:DNA/RNA helicase, DEAD/DEAH box type, N-terminal,IPR014001:Helicase, superfamily 1/2, ATP-binding domain,IPR014014:RNA helicase, DEAD-box type, Q motif,IPR027417:P-loop containing nucleoside triphosphate hydrolase,			SM00487:DEXDc,SM00490:HELICc,	ATP-binding,Complete proteome,Helicase,Hydrolase,Nucleotide-binding,Proteomics identification,Reference proteome,
A6QLB2	DEAD-box helicase 23(DDX23)	Bos taurus		GO:0000375~RNA splicing, via transesterification reactions,GO:0010501~RNA secondary structure unwinding,	GO:0005682~U5 snRNP,GO:0005730~nucleolus,GO:0070062~extracellular exosome,GO:0071013~catalytic step 2 spliceosome,	GO:0004004~ATP-dependent RNA helicase activity,GO:0005524~ATP binding,GO:0044822~poly(A) RNA binding,	IPR000629:RNA helicase, ATP-dependent, DEAD-box, conserved site,IPR001650:Helicase, C-terminal,IPR011545:DNA/RNA helicase, DEAD/DEAH box type, N-terminal,IPR014001:Helicase, superfamily 1/2, ATP-binding domain,IPR014014:RNA helicase, DEAD-box type, Q motif,IPR027417:P-loop containing nucleoside triphosphate hydrolase,	bta03040:Spliceosome,		SM00487:DEXDc,SM00490:HELICc,	Coiled coil,Complete proteome,Reference proteome,
Q2TBP1	DEAD-box helicase 25(DDX25)	Bos taurus		GO:0006406~mRNA export from nucleus,GO:0006417~regulation of translation,GO:0007275~multicellular organism development,GO:0007286~spermatid development,GO:0010501~RNA secondary structure unwinding,	GO:0005634~nucleus,GO:0005737~cytoplasm,GO:0033391~chromatoid body,	GO:0003676~nucleic acid binding,GO:0003723~RNA binding,GO:0004004~ATP-dependent RNA helicase activity,GO:0005524~ATP binding,	IPR001650:Helicase, C-terminal,IPR011545:DNA/RNA helicase, DEAD/DEAH box type, N-terminal,IPR014001:Helicase, superfamily 1/2, ATP-binding domain,IPR014014:RNA helicase, DEAD-box type, Q motif,IPR027417:P-loop containing nucleoside triphosphate hydrolase,			SM00487:DEXDc,SM00490:HELICc,	ATP-binding,Complete proteome,Cytoplasm,Developmental protein,Differentiation,Helicase,Hydrolase,mRNA transport,Nucleotide-binding,Nucleus,Phosphoprotein,Reference proteome,RNA-binding,Spermatogenesis,Translation regulation,Transport,	chain:ATP-dependent RNA helicase DDX25,domain:Helicase ATP-binding,domain:Helicase C-terminal,nucleotide phosphate-binding region:ATP,short sequence motif:DEAD box,short sequence motif:Nuclear export signal,short sequence motif:Nuclear localization signal,short sequence motif:Q motif,
A1A4H6	DEAD-box helicase 27(DDX27)	Bos taurus		GO:0006364~rRNA processing,GO:0010501~RNA secondary structure unwinding,	GO:0005694~chromosome,GO:0005730~nucleolus,	GO:0004004~ATP-dependent RNA helicase activity,GO:0005524~ATP binding,GO:0044822~poly(A) RNA binding,	IPR000629:RNA helicase, ATP-dependent, DEAD-box, conserved site,IPR001650:Helicase, C-terminal,IPR011545:DNA/RNA helicase, DEAD/DEAH box type, N-terminal,IPR014001:Helicase, superfamily 1/2, ATP-binding domain,IPR014014:RNA helicase, DEAD-box type, Q motif,IPR027417:P-loop containing nucleoside triphosphate hydrolase,			SM00487:DEXDc,SM00490:HELICc,	ATP-binding,Chromosome,Complete proteome,Helicase,Hydrolase,Nucleotide-binding,Nucleus,Phosphoprotein,Reference proteome,Ribosome biogenesis,rRNA processing,	chain:Probable ATP-dependent RNA helicase DDX27,domain:Helicase ATP-binding,domain:Helicase C-terminal,modified residue,nucleotide phosphate-binding region:ATP,short sequence motif:DEAD box,short sequence motif:Nuclear localization signal,short sequence motif:Q motif,
G5E631	DEAD-box helicase 3, X-linked(DDX3X)	Bos taurus		GO:0006413~translational initiation,GO:0007059~chromosome segregation,GO:0008625~extrinsic apoptotic signaling pathway via death domain receptors,GO:0009615~response to virus,GO:0010468~regulation of gene expression,GO:0010501~RNA secondary structure unwinding,GO:0016055~Wnt signaling pathway,GO:0017148~negative regulation of translation,GO:0030307~positive regulation of cell growth,GO:0030308~ne…	GO:0005634~nucleus,GO:0005852~eukaryotic translation initiation factor 3 complex,GO:0010494~cytoplasmic stress granule,GO:0022627~cytosolic small ribosomal subunit,GO:0036464~cytoplasmic ribonucleoprotein granule,GO:0070062~extracellular exosome,	GO:0003677~DNA binding,GO:0003924~GTPase activity,GO:0004003~ATP-dependent DNA helicase activity,GO:0004004~ATP-dependent RNA helicase activity,GO:0005524~ATP binding,GO:0008143~poly(A) binding,GO:0035613~RNA stem-loop binding,GO:0043024~ribosomal small subunit binding,GO:0043273~CTPase activity,GO:0048027~mRNA 5'-UTR binding,	IPR000629:RNA helicase, ATP-dependent, DEAD-box, conserved site,IPR001650:Helicase, C-terminal,IPR011545:DNA/RNA helicase, DEAD/DEAH box type, N-terminal,IPR014001:Helicase, superfamily 1/2, ATP-binding domain,IPR014014:RNA helicase, DEAD-box type, Q motif,IPR027417:P-loop containing nucleoside triphosphate hydrolase,	bta04622:RIG-I-like receptor signaling pathway,bta05161:Hepatitis B,bta05203:Viral carcinogenesis,		SM00487:DEXDc,SM00490:HELICc,	ATP-binding,Complete proteome,Helicase,Hydrolase,Nucleotide-binding,Proteomics identification,Reference proteome,
A6QP73	DEAD-box helicase 31(DDX31)	Bos taurus		GO:0010501~RNA secondary structure unwinding,GO:0042254~ribosome biogenesis,	GO:0005730~nucleolus,GO:0005794~Golgi apparatus,	GO:0003723~RNA binding,GO:0004004~ATP-dependent RNA helicase activity,GO:0004386~helicase activity,GO:0005524~ATP binding,GO:0044822~poly(A) RNA binding,	IPR000629:RNA helicase, ATP-dependent, DEAD-box, conserved site,IPR001650:Helicase, C-terminal,IPR011545:DNA/RNA helicase, DEAD/DEAH box type, N-terminal,IPR014001:Helicase, superfamily 1/2, ATP-binding domain,IPR014014:RNA helicase, DEAD-box type, Q motif,IPR025313:Domain of unknown function DUF4217,IPR027417:P-loop containing nucleoside triphosphate hydrolase,			SM00487:DEXDc,SM00490:HELICc,SM01178:SM01178,	ATP-binding,Complete proteome,Helicase,Hydrolase,Nucleotide-binding,Reference proteome,RNA-binding,
Q5W5U4	DEAD-box helicase 4(DDX4)	Bos taurus		GO:0007140~male meiosis,GO:0007275~multicellular organism development,GO:0007283~spermatogenesis,GO:0010501~RNA secondary structure unwinding,GO:0030154~cell differentiation,GO:0030317~sperm motility,GO:0031047~gene silencing by RNA,GO:0034587~piRNA metabolic process,GO:0043046~DNA methylation involved in gamete generation,	GO:0005737~cytoplasm,GO:0033391~chromatoid body,GO:0043186~P granule,GO:0048471~perinuclear region of cytoplasm,GO:0071546~pi-body,GO:0071547~piP-body,	GO:0003676~nucleic acid binding,GO:0004004~ATP-dependent RNA helicase activity,GO:0004386~helicase activity,GO:0005524~ATP binding,	IPR000629:RNA helicase, ATP-dependent, DEAD-box, conserved site,IPR001650:Helicase, C-terminal,IPR011545:DNA/RNA helicase, DEAD/DEAH box type, N-terminal,IPR014001:Helicase, superfamily 1/2, ATP-binding domain,IPR014014:RNA helicase, DEAD-box type, Q motif,IPR027417:P-loop containing nucleoside triphosphate hydrolase,			SM00487:DEXDc,SM00490:HELICc,	ATP-binding,Complete proteome,Cytoplasm,Developmental protein,Differentiation,Helicase,Hydrolase,Meiosis,Nucleotide-binding,Phosphoprotein,Reference proteome,Repeat,RNA-mediated gene silencing,Spermatogenesis,	chain:Probable ATP-dependent RNA helicase DDX4,compositionally biased region:Gly-rich,domain:Helicase ATP-binding,domain:Helicase C-terminal,nucleotide phosphate-binding region:ATP,short sequence motif:DEAD box,short sequence motif:Q motif,
A3KN07	DEAD-box helicase 41(DDX41)	Bos taurus		GO:0010501~RNA secondary structure unwinding,GO:0035458~cellular response to interferon-beta,GO:0045944~positive regulation of transcription from RNA polymerase II promoter,GO:0051607~defense response to virus,	GO:0005783~endoplasmic reticulum,GO:0016020~membrane,GO:0071013~catalytic step 2 spliceosome,	GO:0003677~DNA binding,GO:0004004~ATP-dependent RNA helicase activity,GO:0005524~ATP binding,GO:0044822~poly(A) RNA binding,	IPR001650:Helicase, C-terminal,IPR011545:DNA/RNA helicase, DEAD/DEAH box type, N-terminal,IPR014001:Helicase, superfamily 1/2, ATP-binding domain,IPR014014:RNA helicase, DEAD-box type, Q motif,IPR027417:P-loop containing nucleoside triphosphate hydrolase,			SM00487:DEXDc,SM00490:HELICc,	Coiled coil,Complete proteome,Reference proteome,
E1BJD2	DEAD-box helicase 42(DDX42)	Bos taurus		GO:0008104~protein localization,GO:0010501~RNA secondary structure unwinding,	GO:0005654~nucleoplasm,GO:0005737~cytoplasm,GO:0016020~membrane,	GO:0004004~ATP-dependent RNA helicase activity,GO:0005524~ATP binding,GO:0044822~poly(A) RNA binding,	IPR000629:RNA helicase, ATP-dependent, DEAD-box, conserved site,IPR001650:Helicase, C-terminal,IPR011545:DNA/RNA helicase, DEAD/DEAH box type, N-terminal,IPR014001:Helicase, superfamily 1/2, ATP-binding domain,IPR014014:RNA helicase, DEAD-box type, Q motif,IPR027417:P-loop containing nucleoside triphosphate hydrolase,	bta03040:Spliceosome,		SM00487:DEXDc,SM00490:HELICc,	Coiled coil,Complete proteome,Reference proteome,
E1BII7	DEAD-box helicase 43(DDX43)	Bos taurus		GO:0010501~RNA secondary structure unwinding,	GO:0005622~intracellular,	GO:0003723~RNA binding,GO:0004004~ATP-dependent RNA helicase activity,GO:0005524~ATP binding,	IPR000629:RNA helicase, ATP-dependent, DEAD-box, conserved site,IPR001650:Helicase, C-terminal,IPR004087:K Homology domain,IPR004088:K Homology domain, type 1,IPR011545:DNA/RNA helicase, DEAD/DEAH box type, N-terminal,IPR014001:Helicase, superfamily 1/2, ATP-binding domain,IPR014014:RNA helicase, DEAD-box type, Q motif,IPR027417:P-loop containing nucleoside triphosphate hydrolase,			SM00322:KH,SM00487:DEXDc,SM00490:HELICc,	ATP-binding,Complete proteome,Helicase,Hydrolase,Nucleotide-binding,Reference proteome,
F1MX40	DEAD-box helicase 46(DDX46)	Bos taurus		GO:0000398~mRNA splicing, via spliceosome,GO:0010468~regulation of gene expression,GO:0010501~RNA secondary structure unwinding,		GO:0003676~nucleic acid binding,GO:0004004~ATP-dependent RNA helicase activity,GO:0005524~ATP binding,	IPR000629:RNA helicase, ATP-dependent, DEAD-box, conserved site,IPR001650:Helicase, C-terminal,IPR011545:DNA/RNA helicase, DEAD/DEAH box type, N-terminal,IPR014001:Helicase, superfamily 1/2, ATP-binding domain,IPR014014:RNA helicase, DEAD-box type, Q motif,IPR027417:P-loop containing nucleoside triphosphate hydrolase,	bta03040:Spliceosome,		SM00487:DEXDc,SM00490:HELICc,	Complete proteome,Reference proteome,
Q29S22	DEAD-box helicase 47(DDX47)	Bos taurus		GO:0006364~rRNA processing,GO:0006397~mRNA processing,GO:0008380~RNA splicing,GO:0008625~extrinsic apoptotic signaling pathway via death domain receptors,GO:0010501~RNA secondary structure unwinding,	GO:0005730~nucleolus,GO:0016020~membrane,	GO:0004004~ATP-dependent RNA helicase activity,GO:0005524~ATP binding,GO:0044822~poly(A) RNA binding,	IPR000629:RNA helicase, ATP-dependent, DEAD-box, conserved site,IPR001650:Helicase, C-terminal,IPR011545:DNA/RNA helicase, DEAD/DEAH box type, N-terminal,IPR014001:Helicase, superfamily 1/2, ATP-binding domain,IPR014014:RNA helicase, DEAD-box type, Q motif,IPR027417:P-loop containing nucleoside triphosphate hydrolase,			SM00487:DEXDc,SM00490:HELICc,	Acetylation,Apoptosis,ATP-binding,Complete proteome,Helicase,Hydrolase,mRNA processing,mRNA splicing,Nucleotide-binding,Nucleus,Phosphoprotein,Reference proteome,RNA-binding,rRNA processing,	chain:Probable ATP-dependent RNA helicase DDX47,domain:Helicase ATP-binding,domain:Helicase C-terminal,modified residue,nucleotide phosphate-binding region:ATP,short sequence motif:DEAD box,short sequence motif:Q motif,
Q3SYZ5	DEAD-box helicase 5(DDX5)	Bos taurus		GO:0000122~negative regulation of transcription from RNA polymerase II promoter,GO:0000381~regulation of alternative mRNA splicing, via spliceosome,GO:0006357~regulation of transcription from RNA polymerase II promoter,GO:0009299~mRNA transcription,GO:0010501~RNA secondary structure unwinding,GO:0033148~positive regulation of intracellular estrogen receptor signaling pathway,GO:0043517~positive r…	GO:0005654~nucleoplasm,GO:0005730~nucleolus,GO:0016020~membrane,GO:0070062~extracellular exosome,GO:0071013~catalytic step 2 spliceosome,	GO:0003676~nucleic acid binding,GO:0003712~transcription cofactor activity,GO:0003713~transcription coactivator activity,GO:0003724~RNA helicase activity,GO:0004004~ATP-dependent RNA helicase activity,GO:0005524~ATP binding,GO:0036002~pre-mRNA binding,GO:0044822~poly(A) RNA binding,	IPR000629:RNA helicase, ATP-dependent, DEAD-box, conserved site,IPR001650:Helicase, C-terminal,IPR011545:DNA/RNA helicase, DEAD/DEAH box type, N-terminal,IPR012587:P68HR,IPR014001:Helicase, superfamily 1/2, ATP-binding domain,IPR014014:RNA helicase, DEAD-box type, Q motif,IPR027417:P-loop containing nucleoside triphosphate hydrolase,	bta03040:Spliceosome,bta05202:Transcriptional misregulation in cancer,bta05205:Proteoglycans in cancer,		SM00487:DEXDc,SM00490:HELICc,SM01414:SM01414,	ATP-binding,Complete proteome,Helicase,Hydrolase,Nucleotide-binding,Reference proteome,
F1MGC9	DEAD-box helicase 51(DDX51)	Bos taurus		GO:0010501~RNA secondary structure unwinding,	GO:0016020~membrane,	GO:0004004~ATP-dependent RNA helicase activity,GO:0005524~ATP binding,GO:0044822~poly(A) RNA binding,	IPR000629:RNA helicase, ATP-dependent, DEAD-box, conserved site,IPR001650:Helicase, C-terminal,IPR011545:DNA/RNA helicase, DEAD/DEAH box type, N-terminal,IPR014001:Helicase, superfamily 1/2, ATP-binding domain,IPR027417:P-loop containing nucleoside triphosphate hydrolase,			SM00487:DEXDc,SM00490:HELICc,	ATP-binding,Complete proteome,Helicase,Hydrolase,Nucleotide-binding,Reference proteome,
G3X7G8	DEAD-box helicase 59(DDX59)	Bos taurus		GO:0010501~RNA secondary structure unwinding,	GO:0005622~intracellular,	GO:0003676~nucleic acid binding,GO:0004004~ATP-dependent RNA helicase activity,GO:0005524~ATP binding,	IPR001650:Helicase, C-terminal,IPR007529:Zinc finger, HIT-type,IPR011545:DNA/RNA helicase, DEAD/DEAH box type, N-terminal,IPR014001:Helicase, superfamily 1/2, ATP-binding domain,IPR014014:RNA helicase, DEAD-box type, Q motif,IPR027417:P-loop containing nucleoside triphosphate hydrolase,			SM00487:DEXDc,SM00490:HELICc,	Complete proteome,Reference proteome,
E1BDM8	DEAD-box helicase 6(DDX6)	Bos taurus		GO:0006417~regulation of translation,GO:0010501~RNA secondary structure unwinding,GO:0019074~viral RNA genome packaging,GO:0019827~stem cell population maintenance,GO:0033962~cytoplasmic mRNA processing body assembly,GO:0045665~negative regulation of neuron differentiation,	GO:0000932~cytoplasmic mRNA processing body,GO:0010494~cytoplasmic stress granule,GO:0016020~membrane,GO:0016442~RISC complex,GO:0043231~intracellular membrane-bounded organelle,	GO:0004004~ATP-dependent RNA helicase activity,GO:0005524~ATP binding,GO:0044822~poly(A) RNA binding,	IPR000629:RNA helicase, ATP-dependent, DEAD-box, conserved site,IPR001650:Helicase, C-terminal,IPR011545:DNA/RNA helicase, DEAD/DEAH box type, N-terminal,IPR014001:Helicase, superfamily 1/2, ATP-binding domain,IPR014014:RNA helicase, DEAD-box type, Q motif,IPR027417:P-loop containing nucleoside triphosphate hydrolase,	bta03018:RNA degradation,		SM00487:DEXDc,SM00490:HELICc,	ATP-binding,Complete proteome,Helicase,Hydrolase,Nucleotide-binding,Proteomics identification,Reference proteome,
E1BL06	DEAD/H-box helicase 11(DDX11)	Bos taurus		GO:0006139~nucleobase-containing compound metabolic process,GO:0007062~sister chromatid cohesion,	GO:0000790~nuclear chromatin,GO:0000922~spindle pole,GO:0005654~nucleoplasm,GO:0005730~nucleolus,GO:0030496~midbody,GO:0070062~extracellular exosome,	GO:0003690~double-stranded DNA binding,GO:0003697~single-stranded DNA binding,GO:0004003~ATP-dependent DNA helicase activity,GO:0005524~ATP binding,	IPR006554:Helicase-like, DEXD box c2 type,IPR006555:ATP-dependent helicase, C-terminal,IPR010614:DEAD2,IPR013020:DNA helicase (DNA repair), Rad3 type,IPR014013:Helicase, superfamily 1/2, ATP-binding domain, DinG/Rad3-type,IPR027417:P-loop containing nucleoside triphosphate hydrolase,			SM00488:DEXDc2,SM00491:HELICc2,	ATP-binding,Complete proteome,Helicase,Hydrolase,Nucleotide-binding,Nucleus,Reference proteome,
A5D7D9	DEAH-box helicase 15(DHX15)	Bos taurus		GO:0000398~mRNA splicing, via spliceosome,	GO:0005681~spliceosomal complex,GO:0005689~U12-type spliceosomal complex,GO:0005737~cytoplasm,GO:0071008~U2-type post-mRNA release spliceosomal complex,	GO:0003725~double-stranded RNA binding,GO:0004004~ATP-dependent RNA helicase activity,GO:0005524~ATP binding,GO:0044822~poly(A) RNA binding,	IPR001650:Helicase, C-terminal,IPR002464:DNA/RNA helicase, ATP-dependent, DEAH-box type, conserved site,IPR007502:Helicase-associated domain,IPR011545:DNA/RNA helicase, DEAD/DEAH box type, N-terminal,IPR011709:Domain of unknown function DUF1605,IPR014001:Helicase, superfamily 1/2, ATP-binding domain,IPR027417:P-loop containing nucleoside triphosphate hydrolase,	bta03040:Spliceosome,		SM00487:DEXDc,SM00490:HELICc,SM00847:SM00847,	ATP-binding,Complete proteome,Hydrolase,Nucleotide-binding,Proteomics identification,Reference proteome,
E1BF68	DEAH-box helicase 16(DHX16)	Bos taurus		GO:0000398~mRNA splicing, via spliceosome,	GO:0005654~nucleoplasm,GO:0005681~spliceosomal complex,GO:0005737~cytoplasm,	GO:0004004~ATP-dependent RNA helicase activity,GO:0005524~ATP binding,GO:0044822~poly(A) RNA binding,	IPR001650:Helicase, C-terminal,IPR002464:DNA/RNA helicase, ATP-dependent, DEAH-box type, conserved site,IPR007502:Helicase-associated domain,IPR011545:DNA/RNA helicase, DEAD/DEAH box type, N-terminal,IPR011709:Domain of unknown function DUF1605,IPR014001:Helicase, superfamily 1/2, ATP-binding domain,IPR027417:P-loop containing nucleoside triphosphate hydrolase,	bta03040:Spliceosome,		SM00487:DEXDc,SM00490:HELICc,SM00847:SM00847,	ATP-binding,Coiled coil,Complete proteome,Hydrolase,Nucleotide-binding,Reference proteome,
F1MWZ4	DEAH-box helicase 33(DHX33)	Bos taurus		GO:0006396~RNA processing,GO:0045943~positive regulation of transcription from RNA polymerase I promoter,	GO:0005654~nucleoplasm,GO:0005730~nucleolus,GO:0005737~cytoplasm,	GO:0000182~rDNA binding,GO:0003676~nucleic acid binding,GO:0004004~ATP-dependent RNA helicase activity,GO:0005524~ATP binding,GO:0008026~ATP-dependent helicase activity,GO:0044822~poly(A) RNA binding,	IPR001650:Helicase, C-terminal,IPR002464:DNA/RNA helicase, ATP-dependent, DEAH-box type, conserved site,IPR007502:Helicase-associated domain,IPR011709:Domain of unknown function DUF1605,IPR014001:Helicase, superfamily 1/2, ATP-binding domain,IPR027417:P-loop containing nucleoside triphosphate hydrolase,			SM00487:DEXDc,SM00490:HELICc,SM00847:SM00847,	ATP-binding,Complete proteome,Hydrolase,Nucleotide-binding,Reference proteome,
E1BDN4	DEAH-box helicase 35(DHX35)	Bos taurus	General function prediction only,	GO:0006396~RNA processing,	GO:0005681~spliceosomal complex,GO:0005737~cytoplasm,GO:0071013~catalytic step 2 spliceosome,	GO:0004004~ATP-dependent RNA helicase activity,GO:0005524~ATP binding,GO:0044822~poly(A) RNA binding,	IPR001650:Helicase, C-terminal,IPR002464:DNA/RNA helicase, ATP-dependent, DEAH-box type, conserved site,IPR007502:Helicase-associated domain,IPR011709:Domain of unknown function DUF1605,IPR014001:Helicase, superfamily 1/2, ATP-binding domain,IPR027417:P-loop containing nucleoside triphosphate hydrolase,			SM00487:DEXDc,SM00490:HELICc,SM00847:SM00847,	ATP-binding,Complete proteome,Hydrolase,Nucleotide-binding,Reference proteome,
Q05B79	DEAH-box helicase 36(DHX36)	Bos taurus		GO:0001503~ossification,GO:0006396~RNA processing,GO:0009615~response to virus,GO:0010501~RNA secondary structure unwinding,GO:0032206~positive regulation of telomere maintenance,GO:0043330~response to exogenous dsRNA,GO:0045944~positive regulation of transcription from RNA polymerase II promoter,	GO:0005634~nucleus,GO:0005737~cytoplasm,GO:0070062~extracellular exosome,	GO:0001047~core promoter binding,GO:0002151~G-quadruplex RNA binding,GO:0003725~double-stranded RNA binding,GO:0004004~ATP-dependent RNA helicase activity,GO:0005524~ATP binding,GO:0008094~DNA-dependent ATPase activity,GO:0044822~poly(A) RNA binding,GO:0051880~G-quadruplex DNA binding,	IPR001650:Helicase, C-terminal,IPR002464:DNA/RNA helicase, ATP-dependent, DEAH-box type, conserved site,IPR007502:Helicase-associated domain,IPR011545:DNA/RNA helicase, DEAD/DEAH box type, N-terminal,IPR011709:Domain of unknown function DUF1605,IPR014001:Helicase, superfamily 1/2, ATP-binding domain,IPR027417:P-loop containing nucleoside triphosphate hydrolase,	bta03018:RNA degradation,		SM00487:DEXDc,SM00490:HELICc,SM00847:SM00847,	ATP-binding,Complete proteome,Hydrolase,Nucleotide-binding,Reference proteome,
E1BNQ2	DEAH-box helicase 37(DHX37)	Bos taurus		GO:0006396~RNA processing,	GO:0005730~nucleolus,GO:0005737~cytoplasm,	GO:0004004~ATP-dependent RNA helicase activity,GO:0005524~ATP binding,GO:0044822~poly(A) RNA binding,	IPR001650:Helicase, C-terminal,IPR003593:AAA+ ATPase domain,IPR007502:Helicase-associated domain,IPR011545:DNA/RNA helicase, DEAD/DEAH box type, N-terminal,IPR011709:Domain of unknown function DUF1605,IPR014001:Helicase, superfamily 1/2, ATP-binding domain,IPR027417:P-loop containing nucleoside triphosphate hydrolase,			SM00382:AAA,SM00487:DEXDc,SM00490:HELICc,SM00847:SM00847,	ATP-binding,Complete proteome,Hydrolase,Nucleotide-binding,Reference proteome,
F1MVJ1, Q17R09	DEAH-box helicase 38(DHX38)	Bos taurus		GO:0000398~mRNA splicing, via spliceosome,	GO:0005681~spliceosomal complex,GO:0005737~cytoplasm,GO:0016020~membrane,GO:0071013~catalytic step 2 spliceosome,	GO:0004004~ATP-dependent RNA helicase activity,GO:0005524~ATP binding,GO:0008026~ATP-dependent helicase activity,GO:0044822~poly(A) RNA binding,	IPR001650:Helicase, C-terminal,IPR002464:DNA/RNA helicase, ATP-dependent, DEAH-box type, conserved site,IPR007502:Helicase-associated domain,IPR011545:DNA/RNA helicase, DEAD/DEAH box type, N-terminal,IPR011709:Domain of unknown function DUF1605,IPR014001:Helicase, superfamily 1/2, ATP-binding domain,IPR027417:P-loop containing nucleoside triphosphate hydrolase,	bta03040:Spliceosome,		SM00487:DEXDc,SM00490:HELICc,SM00847:SM00847,	ATP-binding,Coiled coil,Complete proteome,Helicase,Hydrolase,Isopeptide bond,mRNA processing,mRNA splicing,Nucleotide-binding,Nucleus,Phosphoprotein,Reference proteome,Spliceosome,Ubl conjugation,	chain:Pre-mRNA-splicing factor ATP-dependent RNA helicase PRP16,domain:Helicase ATP-binding,domain:Helicase C-terminal,modified residue,nucleotide phosphate-binding region:ATP,short sequence motif:DEAH box,
Q08DS9	DEAH-box helicase 40(DHX40)	Bos taurus		GO:0006396~RNA processing,	GO:0005730~nucleolus,GO:0005737~cytoplasm,	GO:0004004~ATP-dependent RNA helicase activity,GO:0004386~helicase activity,GO:0005524~ATP binding,GO:0044822~poly(A) RNA binding,	IPR001650:Helicase, C-terminal,IPR002464:DNA/RNA helicase, ATP-dependent, DEAH-box type, conserved site,IPR007502:Helicase-associated domain,IPR011545:DNA/RNA helicase, DEAD/DEAH box type, N-terminal,IPR011709:Domain of unknown function DUF1605,IPR014001:Helicase, superfamily 1/2, ATP-binding domain,IPR027417:P-loop containing nucleoside triphosphate hydrolase,			SM00487:DEXDc,SM00490:HELICc,SM00847:SM00847,	ATP-binding,Complete proteome,Hydrolase,Nucleotide-binding,Reference proteome,
F1MEM4	DEAH-box helicase 8(DHX8)	Bos taurus	Translation, ribosomal structure and biogenesis,	GO:0000398~mRNA splicing, via spliceosome,	GO:0005654~nucleoplasm,GO:0005681~spliceosomal complex,GO:0005737~cytoplasm,GO:0071013~catalytic step 2 spliceosome,	GO:0004004~ATP-dependent RNA helicase activity,GO:0005524~ATP binding,GO:0044822~poly(A) RNA binding,	IPR001650:Helicase, C-terminal,IPR002464:DNA/RNA helicase, ATP-dependent, DEAH-box type, conserved site,IPR003029:Ribosomal protein S1, RNA-binding domain,IPR007502:Helicase-associated domain,IPR011709:Domain of unknown function DUF1605,IPR012340:Nucleic acid-binding, OB-fold,IPR014001:Helicase, superfamily 1/2, ATP-binding domain,IPR022967:RNA-binding domain, S1,IPR027417:P-loop containing nucle…	bta03040:Spliceosome,		SM00316:SM00316,SM00487:DEXDc,SM00490:HELICc,SM00847:SM00847,	ATP-binding,Complete proteome,Hydrolase,Nucleotide-binding,Reference proteome,
Q3ZBE0	DEAQ-box RNA dependent ATPase 1(DQX1)	Bos taurus	DNA replication, recombination, and repair,	GO:0000398~mRNA splicing, via spliceosome,	GO:0005681~spliceosomal complex,GO:0005737~cytoplasm,	GO:0004004~ATP-dependent RNA helicase activity,GO:0005524~ATP binding,GO:0044822~poly(A) RNA binding,	IPR007502:Helicase-associated domain,IPR011709:Domain of unknown function DUF1605,IPR027417:P-loop containing nucleoside triphosphate hydrolase,			SM00847:SM00847,	ATP-binding,Complete proteome,Helicase,Hydrolase,Nucleotide-binding,Nucleus,Reference proteome,	chain:ATP-dependent RNA helicase DQX1,compositionally biased region:Poly-Val,domain:Helicase ATP-binding,domain:Helicase C-terminal,nucleotide phosphate-binding region:ATP,short sequence motif:DEAQ box,
A5PK34	DEF6, guanine nucleotide exchange factor(DEF6)	Bos taurus			GO:0016020~membrane,		IPR001849:Pleckstrin homology domain,IPR011992:EF-hand-like domain,IPR011993:Pleckstrin homology-like domain,			SM00233:PH,	Coiled coil,Complete proteome,Reference proteome,
A5PJQ1	DEK proto-oncogene(DEK)	Bos taurus		GO:0006338~chromatin remodeling,GO:0006357~regulation of transcription from RNA polymerase II promoter,GO:2000779~regulation of double-strand break repair,GO:2001032~regulation of double-strand break repair via nonhomologous end joining,	GO:0005634~nucleus,GO:0043292~contractile fiber,	GO:0003677~DNA binding,GO:0003682~chromatin binding,GO:0042393~histone binding,GO:0044822~poly(A) RNA binding,	IPR003034:SAP domain,IPR009057:Homeodomain-like,IPR014876:DEK, C-terminal,			SM00513:SAP,	Coiled coil,Complete proteome,Reference proteome,
F1MME2	DENN domain containing 1A(DENND1A)	Bos taurus		GO:0032456~endocytic recycling,GO:0032483~regulation of Rab protein signal transduction,GO:0048488~synaptic vesicle endocytosis,	GO:0030425~dendrite,GO:0030665~clathrin-coated vesicle membrane,GO:0043025~neuronal cell body,GO:0045202~synapse,	GO:0017112~Rab guanyl-nucleotide exchange factor activity,GO:0032266~phosphatidylinositol-3-phosphate binding,	IPR001194:DENN domain,IPR005112:dDENN domain,IPR005113:uDENN domain,			SM00799:DENN,SM00800:uDENN,SM00801:dDENN,	Complete proteome,Reference proteome,
E1BFU9	DENN domain containing 1C(DENND1C)	Bos taurus				GO:0017112~Rab guanyl-nucleotide exchange factor activity,	IPR001194:DENN domain,IPR005112:dDENN domain,IPR005113:uDENN domain,			SM00799:DENN,SM00800:uDENN,SM00801:dDENN,	Complete proteome,Reference proteome,
E1B8H4	DENN domain containing 2A(DENND2A)	Bos taurus		GO:0042147~retrograde transport, endosome to Golgi,	GO:0005829~cytosol,GO:0015629~actin cytoskeleton,	GO:0017112~Rab guanyl-nucleotide exchange factor activity,	IPR001194:DENN domain,IPR005112:dDENN domain,IPR005113:uDENN domain,			SM00799:DENN,SM00800:uDENN,SM00801:dDENN,	Complete proteome,Reference proteome,
E1B8G3	DENN domain containing 2C(DENND2C)	Bos taurus				GO:0017112~Rab guanyl-nucleotide exchange factor activity,	IPR001194:DENN domain,IPR005112:dDENN domain,IPR005113:uDENN domain,			SM00799:DENN,SM00800:uDENN,SM00801:dDENN,	Complete proteome,Reference proteome,
E1BJE1	DENN domain containing 4A(DENND4A)	Bos taurus				GO:0017112~Rab guanyl-nucleotide exchange factor activity,	IPR001194:DENN domain,IPR002885:Pentatricopeptide repeat,IPR005112:dDENN domain,IPR005113:uDENN domain,IPR023341:MABP domain,			SM00799:DENN,SM00800:uDENN,SM00801:dDENN,	Coiled coil,Complete proteome,Reference proteome,
F1N377	DENN domain containing 4B(DENND4B)	Bos taurus		GO:0032483~regulation of Rab protein signal transduction,	GO:0005634~nucleus,GO:0005794~Golgi apparatus,	GO:0017112~Rab guanyl-nucleotide exchange factor activity,	IPR001194:DENN domain,IPR002885:Pentatricopeptide repeat,IPR005112:dDENN domain,			SM00799:DENN,SM00801:dDENN,	Complete proteome,Reference proteome,
F1N032	DENN domain containing 4C(DENND4C)	Bos taurus		GO:0032869~cellular response to insulin stimulus,GO:0072659~protein localization to plasma membrane,	GO:0005829~cytosol,GO:0005886~plasma membrane,GO:0030904~retromer complex,GO:0032593~insulin-responsive compartment,	GO:0017112~Rab guanyl-nucleotide exchange factor activity,	IPR001194:DENN domain,IPR005112:dDENN domain,IPR005113:uDENN domain,IPR023341:MABP domain,			SM00799:DENN,SM00800:uDENN,SM00801:dDENN,	Complete proteome,Reference proteome,
F1MBQ4	DENN domain containing 6A(DENND6A)	Bos taurus		GO:0043547~positive regulation of GTPase activity,GO:2000049~positive regulation of cell-cell adhesion mediated by cadherin,	GO:0055037~recycling endosome,	GO:0017112~Rab guanyl-nucleotide exchange factor activity,	IPR018307:Late secretory pathway protein AVL9,IPR024224:Uncharacterised protein family FAM116,				Complete proteome,Reference proteome,
G3X7L3	DENN domain containing 6B(DENND6B)	Bos taurus		GO:0043547~positive regulation of GTPase activity,	GO:0055037~recycling endosome,	GO:0017112~Rab guanyl-nucleotide exchange factor activity,	IPR018307:Late secretory pathway protein AVL9,				Complete proteome,Reference proteome,
E1BLB3	DEP domain containing 1B(DEPDC1B)	Bos taurus		GO:0016477~cell migration,GO:0030177~positive regulation of Wnt signaling pathway,GO:0035556~intracellular signal transduction,	GO:0005622~intracellular,		IPR000198:Rho GTPase-activating protein domain,IPR000591:DEP domain,IPR008936:Rho GTPase activation protein,IPR011991:Winged helix-turn-helix DNA-binding domain,			SM00049:DEP,	Complete proteome,Reference proteome,
F1MN63	DEP domain containing 5(DEPDC5)	Bos taurus		GO:0010506~regulation of autophagy,GO:0032007~negative regulation of TOR signaling,GO:0034198~cellular response to amino acid starvation,GO:0035556~intracellular signal transduction,GO:1904262~negative regulation of TORC1 signaling,	GO:0005765~lysosomal membrane,GO:0005829~cytosol,GO:0048471~perinuclear region of cytoplasm,GO:1990130~Iml1 complex,	GO:0005096~GTPase activator activity,	IPR000591:DEP domain,IPR011991:Winged helix-turn-helix DNA-binding domain,IPR027244:Vacuolar membrane-associated protein Iml1,			SM00049:DEP,	Complete proteome,Reference proteome,
A4FV23	DExD-box helicase 21(DDX21)	Bos taurus		GO:0010501~RNA secondary structure unwinding,	GO:0005634~nucleus,	GO:0003723~RNA binding,GO:0004004~ATP-dependent RNA helicase activity,GO:0005524~ATP binding,	IPR001650:Helicase, C-terminal,IPR011545:DNA/RNA helicase, DEAD/DEAH box type, N-terminal,IPR012562:GUCT,IPR012677:Nucleotide-binding, alpha-beta plait,IPR014001:Helicase, superfamily 1/2, ATP-binding domain,IPR014014:RNA helicase, DEAD-box type, Q motif,IPR027417:P-loop containing nucleoside triphosphate hydrolase,			SM00487:DEXDc,SM00490:HELICc,	Complete proteome,Proteomics identification,Reference proteome,
F1MMK3	DExD-box helicase 50(DDX50)	Bos taurus	DNA replication, recombination, and repair / Transcription / Translation, ribosomal structure and biogenesis,	GO:0010501~RNA secondary structure unwinding,	GO:0005634~nucleus,GO:0005730~nucleolus,GO:0005886~plasma membrane,	GO:0003723~RNA binding,GO:0004004~ATP-dependent RNA helicase activity,GO:0004386~helicase activity,GO:0005524~ATP binding,GO:0044822~poly(A) RNA binding,	IPR001650:Helicase, C-terminal,IPR011545:DNA/RNA helicase, DEAD/DEAH box type, N-terminal,IPR012562:GUCT,IPR012677:Nucleotide-binding, alpha-beta plait,IPR014001:Helicase, superfamily 1/2, ATP-binding domain,IPR014014:RNA helicase, DEAD-box type, Q motif,IPR027417:P-loop containing nucleoside triphosphate hydrolase,			SM00487:DEXDc,SM00490:HELICc,	Complete proteome,Reference proteome,
F1MKU1	DExD/H-box helicase 58(DDX58)	Bos taurus	DNA replication, recombination, and repair,	GO:0002230~positive regulation of defense response to virus by host,GO:0009597~detection of virus,GO:0030334~regulation of cell migration,GO:0032725~positive regulation of granulocyte macrophage colony-stimulating factor production,GO:0032727~positive regulation of interferon-alpha production,GO:0032728~positive regulation of interferon-beta production,GO:0032755~positive regulation of interleuki…	GO:0005737~cytoplasm,GO:0005923~bicellular tight junction,GO:0015629~actin cytoskeleton,GO:0032587~ruffle membrane,	GO:0003690~double-stranded DNA binding,GO:0003725~double-stranded RNA binding,GO:0003727~single-stranded RNA binding,GO:0005524~ATP binding,GO:0008270~zinc ion binding,GO:0016817~hydrolase activity, acting on acid anhydrides,	IPR001650:Helicase, C-terminal,IPR011545:DNA/RNA helicase, DEAD/DEAH box type, N-terminal,IPR014001:Helicase, superfamily 1/2, ATP-binding domain,IPR021673:C-terminal domain of RIG-I,IPR027417:P-loop containing nucleoside triphosphate hydrolase,	bta04064:NF-kappa B signaling pathway,bta04622:RIG-I-like receptor signaling pathway,bta04623:Cytosolic DNA-sensing pathway,bta05160:Hepatitis C,bta05161:Hepatitis B,bta05162:Measles,bta05164:Influenza A,bta05168:Herpes simplex infection,bta05169:Epstein-Barr virus infection,		SM00487:DEXDc,SM00490:HELICc,	Complete proteome,Reference proteome,
E1B9N7	DExH-box helicase 29(DHX29)	Bos taurus		GO:0006396~RNA processing,	GO:0005634~nucleus,GO:0005739~mitochondrion,GO:0016282~eukaryotic 43S preinitiation complex,	GO:0004004~ATP-dependent RNA helicase activity,GO:0005524~ATP binding,GO:0043024~ribosomal small subunit binding,GO:0044822~poly(A) RNA binding,	IPR001650:Helicase, C-terminal,IPR002464:DNA/RNA helicase, ATP-dependent, DEAH-box type, conserved site,IPR007502:Helicase-associated domain,IPR011545:DNA/RNA helicase, DEAD/DEAH box type, N-terminal,IPR011709:Domain of unknown function DUF1605,IPR014001:Helicase, superfamily 1/2, ATP-binding domain,IPR027417:P-loop containing nucleoside triphosphate hydrolase,			SM00487:DEXDc,SM00490:HELICc,SM00847:SM00847,	ATP-binding,Coiled coil,Complete proteome,Hydrolase,Nucleotide-binding,Reference proteome,
F1N1A2	DExH-box helicase 57(DHX57)	Bos taurus		GO:0006396~RNA processing,	GO:0005634~nucleus,GO:0005739~mitochondrion,	GO:0004004~ATP-dependent RNA helicase activity,GO:0004386~helicase activity,GO:0005524~ATP binding,GO:0044822~poly(A) RNA binding,GO:0046872~metal ion binding,	IPR000571:Zinc finger, CCCH-type,IPR001650:Helicase, C-terminal,IPR006575:RWD domain,IPR007502:Helicase-associated domain,IPR009060:UBA-like,IPR011545:DNA/RNA helicase, DEAD/DEAH box type, N-terminal,IPR011709:Domain of unknown function DUF1605,IPR014001:Helicase, superfamily 1/2, ATP-binding domain,IPR015940:Ubiquitin-associated/translation elongation factor EF1B, N-terminal, eukaryote,IPR027417…			SM00356:ZnF_C3H1,SM00487:DEXDc,SM00490:HELICc,SM00847:SM00847,	ATP-binding,Complete proteome,Hydrolase,Metal-binding,Nucleotide-binding,Reference proteome,
Q28141	DExH-box helicase 9(DHX9)	Bos taurus		GO:0001649~osteoblast differentiation,GO:0006396~RNA processing,GO:0048511~rhythmic process,GO:0070934~CRD-mediated mRNA stabilization,GO:1903608~protein localization to cytoplasmic stress granule,	GO:0005634~nucleus,GO:0005654~nucleoplasm,GO:0005730~nucleolus,GO:0005737~cytoplasm,GO:0005813~centrosome,GO:0016020~membrane,GO:0030529~intracellular ribonucleoprotein complex,GO:0036464~cytoplasmic ribonucleoprotein granule,GO:0070937~CRD-mediated mRNA stability complex,GO:0097165~nuclear stress granule,	GO:0003677~DNA binding,GO:0004004~ATP-dependent RNA helicase activity,GO:0005524~ATP binding,GO:0008026~ATP-dependent helicase activity,GO:0044822~poly(A) RNA binding,	IPR001650:Helicase, C-terminal,IPR002464:DNA/RNA helicase, ATP-dependent, DEAH-box type, conserved site,IPR007502:Helicase-associated domain,IPR011545:DNA/RNA helicase, DEAD/DEAH box type, N-terminal,IPR011709:Domain of unknown function DUF1605,IPR014001:Helicase, superfamily 1/2, ATP-binding domain,IPR014720:Double-stranded RNA-binding-like domain,IPR027417:P-loop containing nucleoside triphosph…			SM00358:DSRM,SM00487:DEXDc,SM00490:HELICc,SM00847:SM00847,	Acetylation,Activator,ATP-binding,Biological rhythms,Complete proteome,Cytoplasm,DNA-binding,Helicase,Hydrolase,Methylation,Nucleotide-binding,Nucleus,Phosphoprotein,Proteomics identification,Reference proteome,Repeat,RNA-binding,	chain:ATP-dependent RNA helicase A,domain:DRBM 1,domain:DRBM 2,domain:Helicase ATP-binding,domain:Helicase C-terminal,modified residue,nucleotide phosphate-binding region:ATP,region of interest:Interaction with BRCA1,region of interest:Interaction with CREBBP,region of interest:MTAD,region of interest:NTD,short sequence motif:DEIH box,short sequence motif:Nuclear localization signal,
A6QR44	DGCR8, microprocessor complex subunit(DGCR8)	Bos taurus		GO:0031053~primary miRNA processing,GO:0072091~regulation of stem cell proliferation,GO:0090502~RNA phosphodiester bond hydrolysis, endonucleolytic,	GO:0005654~nucleoplasm,GO:0005730~nucleolus,GO:0005737~cytoplasm,GO:0015630~microtubule cytoskeleton,GO:0070877~microprocessor complex,	GO:0003725~double-stranded RNA binding,GO:0004525~ribonuclease III activity,GO:0020037~heme binding,GO:0042803~protein homodimerization activity,GO:0046872~metal ion binding,GO:0070878~primary miRNA binding,	IPR001202:WW domain,IPR014720:Double-stranded RNA-binding-like domain,			SM00358:DSRM,SM00456:WW,	Complete proteome,Heme,Iron,Isopeptide bond,Metal-binding,Nucleus,Phosphoprotein,Reference proteome,Repeat,RNA-binding,Ubl conjugation,	chain:Microprocessor complex subunit DGCR8,domain:DRBM 1,domain:DRBM 2,domain:WW,metal ion-binding site:Iron (heme axial ligand),modified residue,region of interest:Necessary for heme-binding and pri-miRNA processing,region of interest:Necessary for interaction with NCL,region of interest:Necessary for interaction with RNASEN,region of interest:Necessary for nuclear localization and retention,
G5E6L2	DIRAS family GTPase 1(DIRAS1)	Bos taurus		GO:0007264~small GTPase mediated signal transduction,	GO:0005622~intracellular,GO:0005886~plasma membrane,	GO:0003924~GTPase activity,GO:0005525~GTP binding,	IPR001806:Small GTPase superfamily,IPR005225:Small GTP-binding protein domain,IPR020849:Small GTPase superfamily, Ras type,IPR027417:P-loop containing nucleoside triphosphate hydrolase,				Complete proteome,GTP-binding,Nucleotide-binding,Reference proteome,
F1N2Q9	DIRAS family GTPase 2(DIRAS2)	Bos taurus		GO:0007264~small GTPase mediated signal transduction,	GO:0005622~intracellular,GO:0005886~plasma membrane,	GO:0005525~GTP binding,	IPR001806:Small GTPase superfamily,IPR005225:Small GTP-binding protein domain,IPR020849:Small GTPase superfamily, Ras type,IPR027417:P-loop containing nucleoside triphosphate hydrolase,				Complete proteome,GTP-binding,Nucleotide-binding,Reference proteome,
E1B7R0	DIS3 like 3'-5' exoribonuclease 2(DIS3L2)	Bos taurus		GO:0006364~rRNA processing,GO:0006402~mRNA catabolic process,GO:0008285~negative regulation of cell proliferation,GO:0010587~miRNA catabolic process,GO:0016075~rRNA catabolic process,GO:0019827~stem cell population maintenance,GO:0034427~nuclear-transcribed mRNA catabolic process, exonucleolytic, 3'-5',GO:0051301~cell division,GO:0051306~mitotic sister chromatid separation,GO:1990074~polyuridylat…	GO:0000176~nuclear exosome (RNase complex),GO:0000177~cytoplasmic exosome (RNase complex),GO:0000932~cytoplasmic mRNA processing body,	GO:0000175~3'-5'-exoribonuclease activity,GO:0000287~magnesium ion binding,GO:0008266~poly(U) RNA binding,	IPR012340:Nucleic acid-binding, OB-fold,IPR022966:Ribonuclease II/R, conserved site,				Cell cycle,Cell division,Complete proteome,Cytoplasm,Exonuclease,Hydrolase,Magnesium,Manganese,Metal-binding,Mitosis,Nuclease,Reference proteome,RNA-binding,Tumor suppressor,
A0JN80	DIS3 like exosome 3'-5' exoribonuclease(DIS3L)	Bos taurus		GO:0006364~rRNA processing,GO:0006402~mRNA catabolic process,GO:0016075~rRNA catabolic process,GO:0090503~RNA phosphodiester bond hydrolysis, exonucleolytic,	GO:0000176~nuclear exosome (RNase complex),GO:0000177~cytoplasmic exosome (RNase complex),GO:0005813~centrosome,GO:0005886~plasma membrane,	GO:0000175~3'-5'-exoribonuclease activity,GO:0003723~RNA binding,	IPR012340:Nucleic acid-binding, OB-fold,IPR022966:Ribonuclease II/R, conserved site,	bta03018:RNA degradation,			Complete proteome,Cytoplasm,Exonuclease,Exosome,Hydrolase,Magnesium,Nuclease,Phosphoprotein,Reference proteome,RNA-binding,	chain:DIS3-like exonuclease 1,
F1MD63	DIX domain containing 1(DIXDC1)	Bos taurus		GO:0007049~cell cycle,GO:0016055~Wnt signaling pathway,GO:0021799~cerebral cortex radially oriented cell migration,GO:0021869~forebrain ventricular zone progenitor cell division,GO:0032956~regulation of actin cytoskeleton organization,GO:0045665~negative regulation of neuron differentiation,GO:0060070~canonical Wnt signaling pathway,GO:0070507~regulation of microtubule cytoskeleton organization,G…	GO:0005829~cytosol,		IPR001158:DIX domain,IPR001715:Calponin homology domain,IPR015506:Dishevelled-related protein,			SM00021:DAX,SM00033:CH,	Coiled coil,Complete proteome,Reference proteome,Signal,
A5PK36, A7E300	DLC1 Rho GTPase activating protein(DLC1)	Bos taurus		GO:0006915~apoptotic process,GO:0006919~activation of cysteine-type endopeptidase activity involved in apoptotic process,GO:0007165~signal transduction,GO:0008285~negative regulation of cell proliferation,GO:0008360~regulation of cell shape,GO:0030336~negative regulation of cell migration,GO:0035023~regulation of Rho protein signal transduction,GO:0035024~negative regulation of Rho protein signal…	GO:0005634~nucleus,GO:0005737~cytoplasm,GO:0005829~cytosol,GO:0005901~caveola,GO:0005925~focal adhesion,GO:0016020~membrane,GO:0030864~cortical actin cytoskeleton,GO:0032587~ruffle membrane,	GO:0005096~GTPase activator activity,GO:0008289~lipid binding,	IPR000198:Rho GTPase-activating protein domain,IPR001660:Sterile alpha motif domain,IPR002913:START domain,IPR008936:Rho GTPase activation protein,IPR013761:Sterile alpha motif/pointed domain,IPR023393:START-like domain,			SM00234:START,SM00324:RhoGAP,	Cell junction,Complete proteome,Cytoplasm,GTPase activation,Membrane,Phosphoprotein,Reference proteome,Tumor suppressor,	chain:Rho GTPase-activating protein 7,compositionally biased region:Poly-Ser,compositionally biased region:Ser-rich,domain:Rho-GAP,domain:SAM,domain:START,modified residue,
E1BB27	DLG associated protein 1(DLGAP1)	Bos taurus		GO:0007268~chemical synaptic transmission,	GO:0014069~postsynaptic density,		IPR005026:Guanylate-kinase-associated protein,	bta04724:Glutamatergic synapse,			Coiled coil,Complete proteome,Reference proteome,
E1BBJ2	DLG associated protein 3(DLGAP3)	Bos taurus		GO:0023052~signaling,	GO:0045202~synapse,	GO:0001540~beta-amyloid binding,	IPR005026:Guanylate-kinase-associated protein,				Complete proteome,Reference proteome,
F1N5I2	DLG associated protein 4(DLGAP4)	Bos taurus		GO:0023052~signaling,	GO:0045202~synapse,		IPR005026:Guanylate-kinase-associated protein,				Complete proteome,Reference proteome,
Q08DQ9	DLG associated protein 5(DLGAP5)	Bos taurus		GO:0023052~signaling,	GO:0005634~nucleus,GO:0005737~cytoplasm,GO:0031616~spindle pole centrosome,	GO:0004721~phosphoprotein phosphatase activity,	IPR005026:Guanylate-kinase-associated protein,				Coiled coil,Complete proteome,Reference proteome,
E1BAR8	DMRT like family A1(DMRTA1)	Bos taurus		GO:0001541~ovarian follicle development,GO:0007548~sex differentiation,GO:0060179~male mating behavior,	GO:0005634~nucleus,	GO:0000987~core promoter proximal region sequence-specific DNA binding,GO:0003700~transcription factor activity, sequence-specific DNA binding,GO:0042803~protein homodimerization activity,	IPR001275:DM DNA-binding,IPR005173:DMRTA motif,IPR009060:UBA-like,IPR026607:DMRT/protein doublesex/protein male abnormal 3,			SM00301:DM,	Complete proteome,Reference proteome,
F1MXH8	DMRT like family B with proline rich C-terminal 1(DMRTB1)	Bos taurus		GO:0007548~sex differentiation,	GO:0005634~nucleus,	GO:0000987~core promoter proximal region sequence-specific DNA binding,GO:0003700~transcription factor activity, sequence-specific DNA binding,GO:0042803~protein homodimerization activity,	IPR001275:DM DNA-binding,IPR026607:DMRT/protein doublesex/protein male abnormal 3,			SM00301:DM,	Complete proteome,Reference proteome,
A6QLL4	DNA cross-link repair 1C(DCLRE1C)	Bos taurus		GO:0006303~double-strand break repair via nonhomologous end joining,GO:0010212~response to ionizing radiation,GO:0030183~B cell differentiation,GO:0031848~protection from non-homologous end joining at telomere,GO:0033151~V(D)J recombination,GO:0036297~interstrand cross-link repair,	GO:0000784~nuclear chromosome, telomeric region,GO:0070419~nonhomologous end joining complex,	GO:0000014~single-stranded DNA endodeoxyribonuclease activity,GO:0003684~damaged DNA binding,GO:0035312~5'-3' exodeoxyribonuclease activity,	IPR001279:Beta-lactamase-like,IPR011084:DNA repair metallo-beta-lactamase,	bta03450:Non-homologous end-joining,bta05340:Primary immunodeficiency,			Complete proteome,Reference proteome,
E1BCV2	DNA damage induced apoptosis suppressor(DDIAS)	Bos taurus					IPR012340:Nucleic acid-binding, OB-fold,IPR013955:Replication factor A, C-terminal,				Complete proteome,Reference proteome,Signal,
Q58CZ0	DNA fragmentation factor subunit beta(DFFB)	Bos taurus		GO:0006309~apoptotic DNA fragmentation,	GO:0000790~nuclear chromatin,GO:0005634~nucleus,GO:0005737~cytoplasm,	GO:0003677~DNA binding,GO:0004518~nuclease activity,GO:0004536~deoxyribonuclease activity,	IPR003508:Caspase-activated nuclease CIDE-N,IPR015311:Apoptosis, DNA fragmentation factor 40kDa,	bta04210:Apoptosis,		SM00266:CAD,	Apoptosis,Complete proteome,Cytoplasm,Hydrolase,Nuclease,Nucleus,Reference proteome,	chain:DNA fragmentation factor subunit beta,domain:CIDE-N,
F1MFY4	DNA helicase B(HELB)	Bos taurus		GO:0000398~mRNA splicing, via spliceosome,GO:0006269~DNA replication, synthesis of RNA primer,GO:0006974~cellular response to DNA damage stimulus,GO:1903775~regulation of DNA double-strand break processing,GO:2000042~negative regulation of double-strand break repair via homologous recombination,	GO:0005658~alpha DNA polymerase:primase complex,GO:0005662~DNA replication factor A complex,GO:0005681~spliceosomal complex,GO:0005737~cytoplasm,GO:0035861~site of double-strand break,	GO:0004003~ATP-dependent DNA helicase activity,GO:0004004~ATP-dependent RNA helicase activity,GO:0017116~single-stranded DNA-dependent ATP-dependent DNA helicase activity,GO:0043141~ATP-dependent 5'-3' DNA helicase activity,GO:0044822~poly(A) RNA binding,	IPR027044:DNA helicase B,IPR027417:P-loop containing nucleoside triphosphate hydrolase,				Complete proteome,Reference proteome,
A4IFC8	DNA ligase 1(LIG1)	Bos taurus		GO:0006284~base-excision repair,GO:0006310~DNA recombination,GO:0071897~DNA biosynthetic process,GO:1903461~Okazaki fragment processing involved in mitotic DNA replication,	GO:0005634~nucleus,GO:0005654~nucleoplasm,GO:0005739~mitochondrion,GO:0005794~Golgi apparatus,	GO:0003677~DNA binding,GO:0003910~DNA ligase (ATP) activity,GO:0005524~ATP binding,	IPR000977:DNA ligase, ATP-dependent,IPR012308:DNA ligase, ATP-dependent, N-terminal,IPR012309:DNA ligase, ATP-dependent, C-terminal,IPR012310:DNA ligase, ATP-dependent, central,IPR012340:Nucleic acid-binding, OB-fold,IPR016059:DNA ligase, ATP-dependent, conserved site,	bta03030:DNA replication,bta03410:Base excision repair,bta03420:Nucleotide excision repair,bta03430:Mismatch repair,			ATP-binding,Complete proteome,DNA damage,DNA recombination,DNA repair,DNA replication,Ligase,Nucleotide-binding,Reference proteome,
Q0V8N2, F1MQY1	DNA ligase 3(LIG3)	Bos taurus		GO:0006260~DNA replication,GO:0006288~base-excision repair, DNA ligation,GO:0006302~double-strand break repair,GO:0006310~DNA recombination,GO:0051103~DNA ligation involved in DNA repair,GO:0071897~DNA biosynthetic process,GO:0090298~negative regulation of mitochondrial DNA replication,	GO:0005634~nucleus,GO:0005739~mitochondrion,	GO:0003677~DNA binding,GO:0003910~DNA ligase (ATP) activity,GO:0005524~ATP binding,GO:0008270~zinc ion binding,GO:0016874~ligase activity,	IPR000977:DNA ligase, ATP-dependent,IPR001510:Zinc finger, PARP-type,IPR012308:DNA ligase, ATP-dependent, N-terminal,IPR012309:DNA ligase, ATP-dependent, C-terminal,IPR012310:DNA ligase, ATP-dependent, central,IPR012340:Nucleic acid-binding, OB-fold,IPR016059:DNA ligase, ATP-dependent, conserved site,	bta03410:Base excision repair,		SM01336:SM01336,	ATP-binding,Complete proteome,DNA damage,DNA recombination,DNA repair,DNA replication,Ligase,Nucleotide-binding,Reference proteome,
F1MPD5	DNA methyltransferase 3 alpha(DNMT3A)	Bos taurus		GO:0000122~negative regulation of transcription from RNA polymerase II promoter,GO:0006306~DNA methylation,GO:0006346~methylation-dependent chromatin silencing,GO:0006349~regulation of gene expression by genetic imprinting,GO:0007283~spermatogenesis,GO:0010468~regulation of gene expression,GO:0043045~DNA methylation involved in embryo development,GO:0043046~DNA methylation involved in gamete gene…	GO:0000775~chromosome, centromeric region,GO:0000791~euchromatin,GO:0001741~XY body,GO:0005634~nucleus,GO:0005654~nucleoplasm,GO:0005720~nuclear heterochromatin,GO:0005737~cytoplasm,GO:0016363~nuclear matrix,	GO:0003677~DNA binding,GO:0003682~chromatin binding,GO:0003886~DNA (cytosine-5-)-methyltransferase activity,	IPR000313:PWWP,IPR001525:C-5 cytosine methyltransferase,IPR018117:DNA methylase, C-5 cytosine-specific, active site,IPR025766:ADD domain,	bta00270:Cysteine and methionine metabolism,bta01100:Metabolic pathways,bta05206:MicroRNAs in cancer,		SM00293:PWWP,	Complete proteome,Methyltransferase,Reference proteome,Transferase,
Q27958	DNA polymerase beta(POLB)	Bos taurus		GO:0006261~DNA-dependent DNA replication,GO:0006284~base-excision repair,GO:0006287~base-excision repair, gap-filling,GO:0006954~inflammatory response,GO:0006974~cellular response to DNA damage stimulus,GO:0007435~salivary gland morphogenesis,GO:0008630~intrinsic apoptotic signaling pathway in response to DNA damage,GO:0016446~somatic hypermutation of immunoglobulin genes,GO:0048535~lymph node de…	GO:0005634~nucleus,GO:0005737~cytoplasm,GO:0005876~spindle microtubule,GO:0043234~protein complex,	GO:0003677~DNA binding,GO:0003887~DNA-directed DNA polymerase activity,GO:0008017~microtubule binding,GO:0016829~lyase activity,GO:0019899~enzyme binding,GO:0046872~metal ion binding,	IPR002008:DNA polymerase, family X, beta-like,IPR002054:DNA-directed DNA polymerase X,IPR003583:Helix-hairpin-helix DNA-binding motif, class 1,IPR010996:DNA polymerase beta-like, N-terminal domain,IPR018944:DNA polymerase lambda, fingers domain,IPR019843:DNA polymerase family X, binding site,IPR022312:DNA polymerase family X,IPR027420:DNA polymerase beta, N-terminal domain,	bta03410:Base excision repair,bta05166:HTLV-I infection,bta05203:Viral carcinogenesis,		SM00278:HhH1,SM00483:POLXc,	Acetylation,Complete proteome,Cytoplasm,DNA damage,DNA repair,DNA replication,DNA synthesis,DNA-binding,DNA-directed DNA polymerase,Isopeptide bond,Lyase,Magnesium,Metal-binding,Methylation,Nucleotidyltransferase,Nucleus,Reference proteome,Sodium,Transferase,Ubl conjugation,	active site:Schiff-base intermediate with DNA,chain:DNA polymerase beta,metal ion-binding site:Magnesium 1,metal ion-binding site:Magnesium 2,metal ion-binding site:Sodium; via carbonyl oxygen,modified residue,region of interest:DNA binding,sequence conflict,
P28339	DNA polymerase delta 1, catalytic subunit(POLD1)	Bos taurus	DNA replication, recombination, and repair,	GO:0000731~DNA synthesis involved in DNA repair,GO:0006260~DNA replication,GO:0006287~base-excision repair, gap-filling,GO:0006297~nucleotide-excision repair, DNA gap filling,GO:0034644~cellular response to UV,GO:0045004~DNA replication proofreading,GO:0055089~fatty acid homeostasis,GO:0071897~DNA biosynthetic process,GO:0090305~nucleic acid phosphodiester bond hydrolysis,	GO:0000109~nucleotide-excision repair complex,GO:0000784~nuclear chromosome, telomeric region,GO:0005634~nucleus,GO:0005654~nucleoplasm,GO:0005737~cytoplasm,GO:0016020~membrane,GO:0016235~aggresome,GO:0043625~delta DNA polymerase complex,	GO:0000166~nucleotide binding,GO:0003682~chromatin binding,GO:0003684~damaged DNA binding,GO:0003887~DNA-directed DNA polymerase activity,GO:0008296~3'-5'-exodeoxyribonuclease activity,GO:0008408~3'-5' exonuclease activity,GO:0046872~metal ion binding,GO:0051539~4 iron, 4 sulfur cluster binding,	IPR006133:DNA-directed DNA polymerase, family B, exonuclease domain,IPR006134:DNA-directed DNA polymerase, family B, multifunctional domain,IPR006172:DNA-directed DNA polymerase, family B,IPR012337:Ribonuclease H-like domain,IPR017964:DNA-directed DNA polymerase, family B, conserved site,IPR023211:DNA polymerase, palm domain,IPR025687:C4-type zinc-finger of DNA polymerase delta,	bta00230:Purine metabolism,bta00240:Pyrimidine metabolism,bta01100:Metabolic pathways,bta03030:DNA replication,bta03410:Base excision repair,bta03420:Nucleotide excision repair,bta03430:Mismatch repair,bta03440:Homologous recombination,bta05166:HTLV-I infection,		SM00486:POLBc,	4Fe-4S,Coiled coil,Complete proteome,Direct protein sequencing,DNA replication,DNA-binding,DNA-directed DNA polymerase,Exonuclease,Hydrolase,Iron,Iron-sulfur,Metal-binding,Methylation,Nuclease,Nucleotidyltransferase,Nucleus,Reference proteome,Transferase,Zinc,Zinc-finger,	chain:DNA polymerase delta catalytic subunit,modified residue,short sequence motif:Nuclear localization signal,zinc finger region:C4-type,
[truncated: 7,126 more rows]

## Sheet: Functional Annotation Chart
Category	Term	Count	%	PValue	Genes	List Total	Pop Hits	Pop Total	Fold Enrichment	Bonferroni	Benjamini	FDR
[truncated: 1,063 more rows]

[truncated: 11 more sheets: GOTERM_CC_DIRECT, GOTERM_MF_DIRECT, GOTERM_BP_DIRECT, INTERPRO, SMART, PIR_SUPERFAMILY, COG Ontology, KEGG_PATHWAY, SUPFAM, Up keywords, UP_SEQ_FEATURE]
