# Supplementary material for: Transcriptional Repression of MFG-E8 Causes Disturbance in the Homeostasis of Cell Cycle Through DOCK/ZP4/STAT Signaling in Buffalo Mammary Epithelial Cells
Source: Front Cell Dev Biol. 2021 Apr 1;9:568660. doi: 10.3389/fcell.2021.568660 (PMC8047144; doi:10.3389/fcell.2021.568660)
Supplement: Supplementary Table 4 — KEGG BRITE annotation of MFGE8 linked differentially expressed proteins. [file Table_4.XLSX]

## Sheet: Total Protein Families
Protein families: Signaling and cellular processes		Protein families: Genetic information processing		Protein families: Metabolism
GPI anchored proteins	24	Mitochondrial biogenesis	130	Enzymes	1700
Glycosaminoglycan binding proteins	82	DNA repair and recombination proteins	141	Protein kinases	289
Proteoglycans	25	Chromosome	535	Phosphatases	191
CD molecules	137	DNA replication proteins	71	Peptidases	235
Cell adhesion molecules and their ligands	193	Proteasome	30	Glycosyltransferases	89
Cytokines	56	Ubiquitin system	357	Prenyltransferases	6
GTP-binding proteins	52	Membrane trafficking	572	Aminoacyl-tRNA synthetase	38
Ion channels	165	Chaperones and folding catalysts	91	Cytochrome P450	32
Nuclear receptors	23	Translation factors	39	TOTAL ENTRIES	2580
Cytokine receptors	60	Transfer RNA biogenesis	75
Enzyme-linked receptors	34	Ribosome biogenesis	109
G protein-coupled receptors	112	Ribosome	70
Exosome	321	Spliceosome	178
Cytoskeleton proteins	202	Messenger RNA biogenesis	179
Secretion system	10	Transcription machinery	110
Transporters	217	Transcription factors	260
TOTAL ENTRIES	1713	TOTAL ENTRIES	2947
Protein families: Signaling and cellular processes	1713
Protein families: Genetic information processing	1713
Protein families: Metabolism	3426
	6852

## Sheet: (GPI)-anchored proteins (24)
Glycosylphosphatidylinositol (GPI)-anchored proteins (24)
Enzymes
sp|P09487|PPBT_BOVIN K01077 E3.1.3.1, phoA, phoB; alkaline phosphatase [EC:3.1.3.1]
tr|F1MNS5|F1MNS5_BOVIN K01513 ENPP1_3, CD203; ectonucleotide pyrophosphatase/phosphodiesterase family member 1/3 [EC:3.1.4.1 3.6.1.9]
tr|E1B8N4|E1B8N4_BOVIN K01194 TREH, treA, treF; alpha,alpha-trehalase [EC:3.2.1.28]
sp|Q05927|5NTD_BOVIN K19970 NT5E, CD73; 5'-nucleotidase [EC:3.1.3.5]
tr|A7MBD9|A7MBD9_BOVIN K01296 CPM; carboxypeptidase M [EC:3.4.17.12]
sp|Q95323|CAH4_BOVIN K18246 CA4; carbonic anhydrase 4 [EC:4.2.1.1]
tr|E1BAP6|E1BAP6_BOVIN K06716 ART1, CD296; ADP-ribosyltransferase 1 [EC:2.4.2.31]
tr|F1MLP3|F1MLP3_BOVIN K18152 BST1, CD157; ADP-ribosyl cyclase 2 [EC:3.2.2.6 2.4.99.20]
sp|P11151|LIPL_BOVIN K01059 LPL; lipoprotein lipase [EC:3.1.1.34]
tr|F1MTV1|F1MTV1_BOVIN K01197 hya; hyaluronoglucosaminidase [EC:3.2.1.35]
sp|Q8SQG8|HYAL2_BOVIN K01197 hya; hyaluronoglucosaminidase [EC:3.2.1.35]
tr|Q8MJ83|Q8MJ83_BOVIN K01197 hya; hyaluronoglucosaminidase [EC:3.2.1.35]
Receptors
sp|Q05588|UPAR_BOVIN K03985 PLAUR, CD87; plasminogen activator, urokinase receptor
tr|A7YY41|A7YY41_BOVIN K19895 GFRA1, GDNFRA; GDNF family receptor alpha 1
Antigens
tr|G3X6M2|G3X6M2_BOVIN K04006 DAF, CD55; decay accelerating factor
tr|L8IWY0|L8IWY0_9CETA K04008 CD59; CD59 antigen
tr|E1BKM1|E1BKM1_BOVIN K06499 CEACAM, CD66; carcinoembryonic antigen-related cell adhesion molecule
tr|F1MU33|F1MU33_BOVIN K06499 CEACAM, CD66; carcinoembryonic antigen-related cell adhesion molecule
tr|F1N2U9|F1N2U9_BOVIN K06499 CEACAM, CD66; carcinoembryonic antigen-related cell adhesion molecule
tr|A8W3P5|A8W3P5_9CETA K06751 MHC1; major histocompatibility complex, class I
tr|Q2TBT0|Q2TBT0_BOVIN K06751 MHC1; major histocompatibility complex, class I
tr|O46714|O46714_BOVIN K06751 MHC1; major histocompatibility complex, class I
tr|Q3YFG6|Q3YFG6_BOVIN K06751 MHC1; major histocompatibility complex, class I
tr|A0A0A0YP11|A0A0A0YP11_BOVIN K06751 MHC1; major histocompatibility complex, class I
tr|E1BD63|E1BD63_BOVIN K06751 MHC1; major histocompatibility complex, class I
tr|G9HQY8|G9HQY8_BOVIN K06751 MHC1; major histocompatibility complex, class I
tr|Q30289|Q30289_BOVIN K06751 MHC1; major histocompatibility complex, class I
tr|O78034|O78034_BOVIN K06751 MHC1; major histocompatibility complex, class I
tr|G9HQS8|G9HQS8_BOVIN K06751 MHC1; major histocompatibility complex, class I
tr|G9HQS7|G9HQS7_BOVIN K06751 MHC1; major histocompatibility complex, class I
tr|O46754|O46754_BOVIN K06751 MHC1; major histocompatibility complex, class I
tr|W5XQG3|W5XQG3_BOVIN K06751 MHC1; major histocompatibility complex, class I
tr|G9HR26|G9HR26_BOVIN K06751 MHC1; major histocompatibility complex, class I
tr|G9HR56|G9HR56_BOVIN K06751 MHC1; major histocompatibility complex, class I
tr|A0A023JCX1|A0A023JCX1_BOVIN K06751 MHC1; major histocompatibility complex, class I
Others
sp|B5SY89|PRIO_BOBOX K05634 PRNP, PrP, CD230; prion protein
tr|F1MM03|F1MM03_BOVIN K06491 NCAM, CD56; neural cell adhesion molecule
sp|P31836|NCAM1_BOVIN K06491 NCAM, CD56; neural cell adhesion molecule
tr|A7YW37|A7YW37_BOVIN K06492 CD58, LFA3; CD58 antigen
sp|P30931|TF_BOVIN K03901 F3, CD142; coagulation factor III (tissue factor)
sp|Q28106|CNTN1_BOVIN K06759 CNTN1; contactin 1
tr|E1BPC9|E1BPC9_BOVIN K06760 CNTN2; contactin 2
sp|P48733|UROM_BOVIN K18274 UMOD; uromodulin
tr|F1MZX8|F1MZX8_BOVIN K08111 GPC5; glypican 5

## Sheet: Glycosaminoglycan bind
Glycosaminoglycan binding proteins (82)
Heparan sulfate/Haparin
Cytokines	(General comment) Chemotaxis, singal transduction, inflammation
sp|P09428|IL1B_BOVIN K04519 IL1B; interleukin 1 beta
sp|P07353|IFNG_BOVIN K04687 IFNG; interferon gamma	Dimerization, modulation of proteolytic processing and the interaction of IFN-gamma with IFN-gamma receptor
Adhesion molecules of cell surface	(General comment) Cell attachment, inflammation, transition
tr|Q24LN2|Q24LN2_BOVIN K06461 ITGAM, CD11b; integrin alpha M	Inhibition of Mac-1-mediated ligand binding
tr|F1MM03|F1MM03_BOVIN K06491 NCAM, CD56; neural cell adhesion molecule	Promotion of nerve cell adhesion
sp|P31836|NCAM1_BOVIN K06491 NCAM, CD56; neural cell adhesion molecule	Promotion of nerve cell adhesion
tr|F6QPE0|F6QPE0_BOVIN K06471 PECAM1, CD31; platelet/endothelial cell adhesion molecule
sp|P51866|PECA1_BOVIN K06471 PECAM1, CD31; platelet/endothelial cell adhesion molecule
Morphogens	(General comment) Effective diffusion, tissue differentiation, development
sp|Q2KJH1|BMP4_BOVIN K04662 BMP4; bone morphogenetic protein 4
tr|F1MM97|F1MM97_BOVIN K11988 SHH; sonic hedgehog
tr|E1BEN9|E1BEN9_BOVIN K03209 WNT1; wingless-type MMTV integration site family, member 1	Involvement in extracellular distribution of Wg proteins
tr|A6H6X8|A6H6X8_BOVIN K00182 WNT2; wingless-type MMTV integration site family, member 2	Involvement in extracellular distribution of Wg proteins
sp|A4D7S0|WNT2_BOVIN K00182 WNT2; wingless-type MMTV integration site family, member 2	Involvement in extracellular distribution of Wg proteins
tr|F1N5R1|F1N5R1_BOVIN K00312 WNT3; wingless-type MMTV integration site family, member 3	Involvement in extracellular distribution of Wg proteins
tr|F1MZV4|F1MZV4_BOVIN K00408 WNT4; wingless-type MMTV integration site family, member 4	Involvement in extracellular distribution of Wg proteins
tr|E1BDG5|E1BDG5_BOVIN K00444 WNT5; wingless-type MMTV integration site family, member 5	Involvement in extracellular distribution of Wg proteins
tr|F1MP15|F1MP15_BOVIN K00444 WNT5; wingless-type MMTV integration site family, member 5	Involvement in extracellular distribution of Wg proteins
tr|F1MN70|F1MN70_BOVIN K00445 WNT6; wingless-type MMTV integration site family, member 6	Involvement in extracellular distribution of Wg proteins
tr|F1N6L8|F1N6L8_BOVIN K00572 WNT7; wingless-type MMTV integration site family, member 7	Involvement in extracellular distribution of Wg proteins
tr|F1MHG3|F1MHG3_BOVIN K00714 WNT8; wingless-type MMTV integration site family, member 8	Involvement in extracellular distribution of Wg proteins
tr|E1BKL2|E1BKL2_BOVIN K00714 WNT8; wingless-type MMTV integration site family, member 8	Involvement in extracellular distribution of Wg proteins
tr|F1N7G3|F1N7G3_BOVIN K01064 WNT9; wingless-type MMTV integration site family, member 9	Involvement in extracellular distribution of Wg proteins
tr|F1MKX1|F1MKX1_BOVIN K01064 WNT9; wingless-type MMTV integration site family, member 9	Involvement in extracellular distribution of Wg proteins
tr|F1MEW8|F1MEW8_BOVIN K01357 WNT10; wingless-type MMTV integration site family, member 10	Involvement in extracellular distribution of Wg proteins
tr|F1MK64|F1MK64_BOVIN K01357 WNT10; wingless-type MMTV integration site family, member 10	Involvement in extracellular distribution of Wg proteins
tr|A2VE89|A2VE89_BOVIN K01384 WNT11; wingless-type MMTV integration site family, member 11	Involvement in extracellular distribution of Wg proteins
sp|Q5E9U6|WNT16_BOVIN K01558 WNT16; wingless-type MMTV integration site family, member 16	Involvement in extracellular distribution of Wg proteins
Growth factors/receptors	(General comment) Ligand-receptor clustering and signaling, cell migration, mitogenesis
sp|P03969|FGF2_BOVIN K18497 FGF2; fibroblast growth factor 2	Cell proliferation, differentiation, and internalization
tr|F1MQA1|F1MQA1_BOVIN K04358 FGF; fibroblast growth factor	Cell proliferation and differentiation
tr|A6H6W8|A6H6W8_BOVIN K04358 FGF; fibroblast growth factor	Cell proliferation and differentiation
tr|F1N6G8|F1N6G8_BOVIN K04358 FGF; fibroblast growth factor	Cell proliferation and differentiation
sp|A0MTF4|FGF5_BOVIN K04358 FGF; fibroblast growth factor	Cell proliferation and differentiation
tr|E1BLM4|E1BLM4_BOVIN K04358 FGF; fibroblast growth factor	Cell proliferation and differentiation
tr|E1B753|E1B753_BOVIN K04358 FGF; fibroblast growth factor	Cell proliferation and differentiation
tr|E1BEB9|E1BEB9_BOVIN K04358 FGF; fibroblast growth factor	Cell proliferation and differentiation
tr|E1BGY3|E1BGY3_BOVIN K04358 FGF; fibroblast growth factor	Cell proliferation and differentiation
tr|J9QCT9|J9QCT9_BOVIN K05093 FGFR2, CD332; fibroblast growth factor receptor 2 [EC:2.7.10.1]	Mitogenesis
tr|J9QCT8|J9QCT8_BOVIN K05093 FGFR2, CD332; fibroblast growth factor receptor 2 [EC:2.7.10.1]	Mitogenesis
sp|Q76BS1|HGF_BOVIN K05460 HGF; hepatocyte growth factor	Haepatocyte regeneration, morphogenesis, cell motility, tumourigenesis and metastasis
tr|F1MPD0|F1MPD0_BOVIN K05455 NRG1; neuregulin 1
sp|Q2KJ15|PDGFA_BOVIN K04359 PDGFA; platelet-derived growth factor subunit A	Storage and secretion of PDGF-AA, and may affect receptor binding
tr|B1H0W5|B1H0W5_BOVIN K17386 PDGFB; platelet-derived growth factor subunit B	Storage and secretion of PDGF-AA, and may affect receptor binding
sp|P21214|TGFB2_BOVIN K13376 TGFB2; transforming growth factor beta-2	Mediating TGF-beta singaling
tr|F1N5F6|F1N5F6_BOVIN K05448 VEGFA; vascular endothelial growth factor A
Extracellular matrix molecules	(General comment) Storage depot, cell adhesion and motility, ECM/barrier formation
tr|F1MAV0|F1MAV0_BOVIN K03904 FGB; fibrinogen beta chain
tr|F1MGU7|F1MGU7_BOVIN K03905 FGG; fibrinogen gamma chain
sp|P07589|FINC_BOVIN K05717 FN1; fibronectin 1	Adhesion, focal adhesion formation
sp|P98133|FBN1_BOVIN K06825 FBN1; fibrillin 1
tr|F1MPK6|F1MPK6_BOVIN K06252 TN; tenascin
tr|E1BB79|E1BB79_BOVIN K06252 TN; tenascin
tr|A0JN60|A0JN60_BOVIN K06252 TN; tenascin
sp|Q28178|TSP1_BOVIN K16857 THBS1; thrombospondin 1
sp|Q95116|TSP2_BOVIN K04659 THBS2S; thrombospondin 2/3/4/5
sp|P35445|COMP_BOVIN K04659 THBS2S; thrombospondin 2/3/4/5
sp|Q3SWW8|TSP4_BOVIN K04659 THBS2S; thrombospondin 2/3/4/5
tr|A6QQT1|A6QQT1_BOVIN K04659 THBS2S; thrombospondin 2/3/4/5
tr|F1MTZ9|F1MTZ9_BOVIN K04659 THBS2S; thrombospondin 2/3/4/5
tr|L8HY22|L8HY22_9CETA K06251 VTN; vitronectin
sp|P02453|CO1A1_BOVIN K06236 COL1A; collagen, type I, alpha
sp|P02465|CO1A2_BOVIN K06236 COL1A; collagen, type I, alpha
sp|P02459|CO2A1_BOVIN K19719 COL2A; collagen, type II, alpha
tr|F1MXS8|F1MXS8_BOVIN K19720 COL3A; collagen, type III, alpha
tr|F1N474|F1N474_BOVIN K06237 COL4A; collagen, type IV, alpha
tr|F1MJ71|F1MJ71_BOVIN K06237 COL4A; collagen, type IV, alpha
tr|F1MZU6|F1MZU6_BOVIN K06237 COL4A; collagen, type IV, alpha
tr|F1N7Q7|F1N7Q7_BOVIN K06237 COL4A; collagen, type IV, alpha
sp|Q7SIB2|CO4A1_BOVIN K06237 COL4A; collagen, type IV, alpha
tr|F1MJQ6|F1MJQ6_BOVIN K19721 COL5AS; collagen, type V/XI/XXIV/XXVII, alpha
tr|F1N2Y2|F1N2Y2_BOVIN K19721 COL5AS; collagen, type V/XI/XXIV/XXVII, alpha
sp|Q32S24|COBA2_BOVIN K19721 COL5AS; collagen, type V/XI/XXIV/XXVII, alpha
tr|F1MTP1|F1MTP1_BOVIN K19721 COL5AS; collagen, type V/XI/XXIV/XXVII, alpha
tr|F1N0K0|F1N0K0_BOVIN K19721 COL5AS; collagen, type V/XI/XXIV/XXVII, alpha
tr|G3MZI7|G3MZI7_BOVIN K19721 COL5AS; collagen, type V/XI/XXIV/XXVII, alpha
tr|F1MD40|F1MD40_BOVIN K06238 COL6A; collagen, type VI, alpha
tr|E1BB91|E1BB91_BOVIN K06238 COL6A; collagen, type VI, alpha
tr|E1BI98|E1BI98_BOVIN K06238 COL6A; collagen, type VI, alpha
tr|A4FV05|A4FV05_BOVIN K06823 COL18A; collagen, type XVIII, alpha
Axon guidance molecules
tr|F1N0C7|F1N0C7_BOVIN K06843 NTN1; netrin 1
tr|F1MLJ7|F1MLJ7_BOVIN K06839 SLIT2; slit 2
Coagulation and fibrinolysis	(General comment) Coagulation, inflammation, complement control
sp|P00735|THRB_BOVIN K01313 F2; coagulation factor II (thrombin) [EC:3.4.21.5]
sp|P00743|FA10_BOVIN K01314 F10; coagulation factor X [EC:3.4.21.6]
sp|Q9N2I2|IPSP_BOVIN K03913 SERPINA5, PCI; protein C inhibitor	Procoagulant
sp|P41361|ANT3_BOVIN K03911 SERPINC1, AT3; antithrombin III	Inactivation of coagulation enzymes at vascular endothelium
tr|A6QPP2|A6QPP2_BOVIN K03912 SERPIND1, HCF2; heparin cofactor II	Inactivation of thrombin
sp|P13909|PAI1_BOVIN K03982 SERPINE1, PAI1; plasminogen activator inhibitor 1
tr|L8IJL3|L8IJL3_9CETA K16643 SERPINE2; glia-derived nexin	Inactivation of serine proteases in the extracellular matrix
sp|Q28198|TPA_BOVIN K01343 PLAT; tissue plasminogen activator [EC:3.4.21.68]
Enzymes	(General comment) Variety
sp|Q9MYY0|HPSE_BOVIN K07964 HPSE; heparanase [EC:3.2.1.166]	Cleavage of HS, participation of degradation and remodelling of the ECM
tr|F1MTV1|F1MTV1_BOVIN K01197 hya; hyaluronoglucosaminidase [EC:3.2.1.35]
sp|Q8SQG8|HYAL2_BOVIN K01197 hya; hyaluronoglucosaminidase [EC:3.2.1.35]
tr|Q8MJ83|Q8MJ83_BOVIN K01197 hya; hyaluronoglucosaminidase [EC:3.2.1.35]
sp|P11151|LIPL_BOVIN K01059 LPL; lipoprotein lipase [EC:3.1.1.34]	Stablization of dimeric LPL, immobilization, internalization, transport
Others
sp|P80929|ANG2_BOVIN K16631 ANG, RNASE5; angiogenin [EC:3.1.27.-]
sp|P81287|ANXA5_BOVIN K16646 ANXA5; annexin A5	Anticoagulant activity
tr|E1BNR0|E1BNR0_BOVIN K14462 APOB; apolipoprotein B	Mediating lipoprotein uptake by cells; role in atherosclerosis
tr|Q0ZCB4|Q0ZCB4_BOVIN K04524 APOE; apolipoprotein E	Mediating lipoprotein uptake by cells; role in atherosclerosis
tr|L8I4L3|L8I4L3_9CETA K04520 APP; amyloid beta A4 protein	Plaque formation
tr|E1BEQ4|E1BEQ4_BOVIN K01319 CTSG; cathepsin G [EC:3.4.21.20]	Protection from inactivation by serpins
sp|B5SY89|PRIO_BOBOX K05634 PRNP, PrP, CD230; prion protein	Plaque formation
sp|P48765|NAC1_BOVIN K05849 SLC8A, NCX; solute carrier family 8 (sodium/calcium exchanger)
tr|E1B7D0|E1B7D0_BOVIN K05849 SLC8A, NCX; solute carrier family 8 (sodium/calcium exchanger)
Hyaluronan
Cell surface receptors
tr|Q9TTF5|Q9TTF5_BOVIN K01242 CD38; ADP-ribosyl cyclase 1 [EC:3.2.2.6 2.4.99.20]	Tissue distribution: leukocyte; Link module: BX7B
tr|F1N331|F1N331_BOVIN K06267 HMMR, RHAMM, CD168; hyaluronan-mediated motility receptor	Link module: BX7B
sp|Q9GL65|TLR4_BOVIN K10160 TLR4, CD284; toll-like receptor 4
sp|Q6UC88|LYVE1_BOVIN K19012 LYVE1; lymphatic vessel endothelial hyaluronan receptor 1	Tissue distribution: lymph vessel endothelium; Link module: type B
tr|E1BNJ1|E1BNJ1_BOVIN K19020 STAB1; stabilin-1	Tissue distribution: liver sinusoidal endothelial cells; Link module: type A
tr|F1MYW1|F1MYW1_BOVIN K19013 STAB2, HARE; stabilin-2	Tissue distribution: liver sinusoidal endothelial cells; Link module: type A
tr|E1BKX1|E1BKX1_BOVIN K19031 CEMIP, KIAA1199; cell migration-inducing and hyaluronan-binding protein [EC:3.2.1.35]	Tissue distribution: widely distribute in normal organs including brain, skin, lung, testis and ovary
tr|F1MNY2|F1MNY2_BOVIN K22144 TEME2; cell surface hyaluronidase [EC:3.2.1.35]
Extracellular matrix or blood plasma proteins
tr|F1N367|F1N367_BOVIN K06792 AGC1, CSPG1; aggrecan 1	Tissue distribution: cartilage; Link module: type C
sp|Q28062|PGCB_BOVIN K06795 BCAN; brevican	Tissue distribution: brain, glia; Link module: type C
tr|F1MD40|F1MD40_BOVIN K06238 COL6A; collagen, type VI, alpha	Link module: N-terminal globule
tr|E1BB91|E1BB91_BOVIN K06238 COL6A; collagen, type VI, alpha	Link module: N-terminal globule
tr|E1BI98|E1BI98_BOVIN K06238 COL6A; collagen, type VI, alpha	Link module: N-terminal globule
tr|F1MAV0|F1MAV0_BOVIN K03904 FGB; fibrinogen beta chain	Tissue distribution: serum; Link module: N-terminal part
tr|F1MGU7|F1MGU7_BOVIN K03905 FGG; fibrinogen gamma chain	Tissue distribution: serum; Link module: N-terminal part
tr|L8IDJ9|L8IDJ9_9CETA K06851 HAPLN2; hyaluronan and proteoglycan link protein 2	Tissue distribution: cartilage; Link module: type C
sp|Q0VCM5|ITIH1_BOVIN K19014 ITIH1, SHAP; inter-alpha-trypsin inhibitor heavy chain H1	Tissue distribution: serum, cumulus oophorus matrix, Synovial fluid; Link module: BX7B
tr|A5D7R6|A5D7R6_BOVIN K19015 ITIH2, SHAP; inter-alpha-trypsin inhibitor heavy chain H2	Tissue distribution: serum, cumulus oophorus matrix, Synovial fluid; Link module: BX7B
sp|Q9GMS5|IMPG1_BOVIN K19016 IMPG1, SPACR; interphotoreceptor matrix proteoglycan 1	Tissue distribution: retina interphotoreceptor matrix; Link module: BX7B
tr|E1BBU2|E1BBU2_BOVIN K19017 IMPG2, SPACRCAN; interphotoreceptor matrix proteoglycan 2	Tissue distribution: retina interphotoreceptor matrix; Link module: BX7B
tr|L8IL35|L8IL35_9CETA K19018 TNFAIP6, TSG6; tumor necrosis factor-inducible gene 6 protein	Link module: type A
sp|P81282|CSPG2_BOVIN K06793 VCAN, CSPG2; versican core protein	Link module: type C
Intracellular proteins
tr|Q58D03|Q58D03_BOVIN K09554 CDC37; cell division cycle protein 37	Tissue distribution: vascular endothelial cell, embryonic brain; Link module: BX7B

## Sheet: Proteoglycans (25)
Proteoglycans (25)
Cell surface proteoglycans
Glypican family (GPI-anchored HSPG)
tr|F1MZX8|F1MZX8_BOVIN K08111 GPC5; glypican 5	HS [cpd:C00925] / CS [cpd:C00607] neurons, kidney, limb, testis
Others
tr|F1N084|F1N084_BOVIN K08115 CSPG4; chondroitin sulfate proteoglycan 4	CS [cpd:C00607] limb, cartilage
tr|F1N164|F1N164_BOVIN K08116 CSPG5; chondroitin sulfate proteoglycan 5 (neuroglycan C)	CS [cpd:C00607] neurons
tr|L8I4L3|L8I4L3_9CETA K04520 APP; amyloid beta (A4) protein	CS [cpd:C00607] ubiquitous
tr|F1N226|F1N226_BOVIN K08117 APLP2; amyloid beta (A4) precursor-like protein 2
Extracellular matrix (ECM) proteoglycans
Small leucine-rich proteoglycan (SLRP) family
class I
sp|Q3ZBN5|ASPN_BOVIN K08120 ASPN; asporin	cartilage, aorta, uterus
class II
sp|P13605|FMOD_BOVIN K08121 FMOD; fibromodulin	KS [cpd:C00573] cornea
sp|Q9GKN8|PRELP_BOVIN K08125 PRELP; proline arginine-rich end leucine-rich repeat protein	cartilage
class III
tr|G3N088|G3N088_BOVIN K08126 OGN; osteoglycin (osteoinductive factor, mimecan)	KS [cpd:C00573] cornea, brain, liver
sp|P58874|OPT_BOVIN K08128 OPTC; opticin	cartilage, iris
class IV
sp|Q27972|CHAD_BOVIN K06248 CHAD; chondroadherin	cartilage
tr|G3N218|G3N218_BOVIN K08129 NYX; nyctalopin	kidney, retina
Others
tr|A7E318|A7E318_BOVIN K08130 TSK, LRRC54; tsukushi (leucine-rich repeat-containing protein 54)
Aggrecan / versican family
tr|F1N367|F1N367_BOVIN K06792 AGC1, CSPG1; aggrecan 1	CS [cpd:C00607] / KS [cpd:C00573] cartilage
sp|P81282|CSPG2_BOVIN K06793 CSPG2, VCAN; chondroitin sulfate proteoglycan 2 (versican)	CS [cpd:C00607] / DS [cpd:C00426] blood vessels, mesenhyme, central nurvous system
sp|Q28062|PGCB_BOVIN K06795 BCAN; brevican	CS [cpd:C00607] brain
Collagen family
tr|F1MND9|F1MND9_BOVIN K08131 COL9A; collagen, type IX, alpha
tr|F6R9Y9|F6R9Y9_BOVIN K08131 COL9A; collagen, type IX, alpha
tr|F1N401|F1N401_BOVIN K08132 COL12A; collagen, type XII, alpha	CS [cpd:C00607] amnion, small intestine, endothelial cells
tr|E1BA17|E1BA17_BOVIN K08133 COL14A; collagen, type XIV, alpha	skin, placenta
Basement membrane proteoglycans
tr|F1MER7|F1MER7_BOVIN K06255 HSPG2; heparan sulfate proteoglycan 2 (perlecan)	HS [cpd:C00925] / CS [cpd:C00607] basement membranes
tr|F1MSI2|F1MSI2_BOVIN K06254 AGRN; agrin	HS [cpd:C00925] basement membranes, lung, kidney
tr|A4FV05|A4FV05_BOVIN K06823 COL18A; collagen, type XVIII, alpha	HS [cpd:C00925] basement membranes
tr|G3N365|G3N365_BOVIN K06669 SMC3, CSPG6; structural maintenance of chromosome 3 (chondroitin sulfate proteoglycan 6)
tr|A4FUY3|A4FUY3_BOVIN K08134 LEPRE; leucine proline-enriched proteoglycan (leprecan)	CS [cpd:C00607] basement membranes
Others
tr|Q17QR9|Q17QR9_BOVIN K08136 SPOCK, TIC1; sparc/osteonectin, cwcv and kazal-like domeins proteoglycan (testican)	CS [cpd:C00607] / HS [cpd:C00925] testis, brain

## Sheet: CD molecules (137)
CD molecules (137)
Proteins
tr|M0QVY3|M0QVY3_BOVIN K06448 CD1a; CD1A antigen, a polypeptide [HSA:909]
tr|A1L565|A1L565_BOVIN K06448 CD1a; CD1A antigen, a polypeptide [HSA:909]
tr|D7PE50|D7PE50_BOVIN K06448 CD1a; CD1A antigen, a polypeptide [HSA:909]
tr|G3X7K2|G3X7K2_BOVIN K06448 CD1a; CD1A antigen, a polypeptide [HSA:909]
tr|M0QVY3|M0QVY3_BOVIN K06448 CD1b; CD1B antigen, b polypeptide [HSA:910]
tr|A1L565|A1L565_BOVIN K06448 CD1b; CD1B antigen, b polypeptide [HSA:910]
tr|D7PE50|D7PE50_BOVIN K06448 CD1b; CD1B antigen, b polypeptide [HSA:910]
tr|G3X7K2|G3X7K2_BOVIN K06448 CD1b; CD1B antigen, b polypeptide [HSA:910]
tr|M0QVY3|M0QVY3_BOVIN K06448 CD1c; CD1C antigen, c polypeptide [HSA:911]
tr|A1L565|A1L565_BOVIN K06448 CD1c; CD1C antigen, c polypeptide [HSA:911]
tr|D7PE50|D7PE50_BOVIN K06448 CD1c; CD1C antigen, c polypeptide [HSA:911]
tr|G3X7K2|G3X7K2_BOVIN K06448 CD1c; CD1C antigen, c polypeptide [HSA:911]
tr|M0QVY3|M0QVY3_BOVIN K06448 CD1d; CD1D antigen, d polypeptide [HSA:912]
tr|A1L565|A1L565_BOVIN K06448 CD1d; CD1D antigen, d polypeptide [HSA:912]
tr|D7PE50|D7PE50_BOVIN K06448 CD1d; CD1D antigen, d polypeptide [HSA:912]
tr|G3X7K2|G3X7K2_BOVIN K06448 CD1d; CD1D antigen, d polypeptide [HSA:912]
tr|M0QVY3|M0QVY3_BOVIN K06448 CD1e; CD1E antigen, e polypeptide [HSA:913]
tr|A1L565|A1L565_BOVIN K06448 CD1e; CD1E antigen, e polypeptide [HSA:913]
tr|D7PE50|D7PE50_BOVIN K06448 CD1e; CD1E antigen, e polypeptide [HSA:913]
tr|G3X7K2|G3X7K2_BOVIN K06448 CD1e; CD1E antigen, e polypeptide [HSA:913]
tr|I0J0J9|I0J0J9_BOVIN K06454 CD4; CD4 antigen (p55) [HSA:920]
tr|F1MU15|F1MU15_BOVIN K06456 CD6; CD6 antigen [HSA:923]
sp|P31783|CD8A_BOVIN K06458 CD8a; CD8 antigen, alpha polypeptide (p32) [HSA:925]
tr|E1BPL8|E1BPL8_BOVIN K01389 CD10, MME; membrane metallo-endopeptidase [HSA:4311]
sp|P61625|ITAL_BOVIN K05718 CD11a, ITGAL; integrin, alpha L [HSA:3683]
tr|Q24LN2|Q24LN2_BOVIN K06461 CD11b, ITGAM; integrin, alpha M [HSA:3684]
tr|F1N6B8|F1N6B8_BOVIN K06594 CD11d, ITGAD; integrin, alpha D [HSA:3681]
tr|Q9TRI4|Q9TRI4_BOVIN K11140 CD13, ANPEP; alanyl (membrane) aminopeptidase [HSA:290]
sp|P32592|ITB2_BOVIN K06464 CD18, ITGB2; integrin, beta 2 [HSA:3689]
tr|E3UM64|E3UM64_BOVIN K04012 CD21, CR2; complement component (3d/Epstein Barr virus) receptor 2 [HSA:1380]
sp|P53712-2|ITB1_BOVIN K05719 CD29, ITGB1; integrin, beta 1 [HSA:3688]
tr|F6QPE0|F6QPE0_BOVIN K06471 CD31, PECAM1; platelet/endothelial cell adhesion molecule (CD31 antigen) [HSA:5175]
sp|P51866|PECA1_BOVIN K06471 CD31, PECAM1; platelet/endothelial cell adhesion molecule (CD31 antigen) [HSA:5175]
tr|F1MHH9|F1MHH9_BOVIN K12560 CD32b, FCGR2B; Fc fragment of IgG, low affinity IIb, receptor for (CD32) [HSA:2213]
tr|E1B8E5|E1B8E5_BOVIN K06473 CD33; CD33 antigen (gp67) [HSA:945]
tr|Q9TTF5|Q9TTF5_BOVIN K01242 CD38; CD38 antigen (p45) [HSA:952]
tr|F1MB25|F1MB25_BOVIN K01510 CD39, ENTPD1; ectonucleoside triphosphate diphosphohydrolase 1 [HSA:953]
tr|A6QLB3|A6QLB3_BOVIN K06476 CD41, ITGA2B; integrin, alpha 2b [HSA:3674]
tr|E1B863|E1B863_BOVIN K06262 CD42c, GP1BB; glycoprotein Ib (platelet), beta polypeptide [HSA:2812]
tr|E1BG29|E1BG29_BOVIN K06260 CD42d, GP5; glycoprotein V (platelet) [HSA:2814]
tr|F1MJS9|F1MJS9_BOVIN K06478 CD45, PTPRC; protein tyrosine phosphatase, receptor type, C [HSA:5788]
tr|F1MLR1|F1MLR1_BOVIN K04007 CD46, MCP; membrane cofactor protein [HSA:4179]
tr|F1MMN6|F1MMN6_BOVIN K06480 CD49a, ITGA1; integrin, alpha 1 [HSA:3672]
sp|F1MMS9|ITA3_BOVIN K06482 CD49c, ITGA3; integrin, alpha 3 [HSA:3675]
tr|F1MK44|F1MK44_BOVIN K06484 CD49e, ITGA5; integrin, alpha 5 [HSA:3678]
tr|E1BFQ6|E1BFQ6_BOVIN K06485 CD49f, ITGA6; integrin, alpha 6 [HSA:3655]
sp|P80746|ITAV_BOVIN K06487 CD51, ITGAV; integrin, alpha V [HSA:3685]
tr|G3X6M2|G3X6M2_BOVIN K04006 CD55, DAF; decay accelerating factor for complement (CD55, Cromer blood group system) [HSA:1604]
tr|F1MM03|F1MM03_BOVIN K06491 CD56, NCAM1; neural cell adhesion molecule 1 [HSA:4684]
sp|P31836|NCAM1_BOVIN K06491 CD56, NCAM1; neural cell adhesion molecule 1 [HSA:4684]
tr|A7YW37|A7YW37_BOVIN K06492 CD58; CD58 antigen [HSA:965]
tr|L8IWY0|L8IWY0_9CETA K04008 CD59; CD59 antigen p18-20 [HSA:966]
tr|E1BKM1|E1BKM1_BOVIN K06499 CD66a, CEACAM1; carcinoembryonic antigen-related cell adhesion molecule 1 [HSA:634]
tr|F1MU33|F1MU33_BOVIN K06499 CD66a, CEACAM1; carcinoembryonic antigen-related cell adhesion molecule 1 [HSA:634]
tr|F1N2U9|F1N2U9_BOVIN K06499 CD66a, CEACAM1; carcinoembryonic antigen-related cell adhesion molecule 1 [HSA:634]
tr|E1BKM1|E1BKM1_BOVIN K06499 CD66b, CEACAM8; carcinoembryonic antigen-related cell adhesion molecule 8 [HSA:1088]
tr|F1MU33|F1MU33_BOVIN K06499 CD66b, CEACAM8; carcinoembryonic antigen-related cell adhesion molecule 8 [HSA:1088]
tr|F1N2U9|F1N2U9_BOVIN K06499 CD66b, CEACAM8; carcinoembryonic antigen-related cell adhesion molecule 8 [HSA:1088]
tr|E1BKM1|E1BKM1_BOVIN K06499 CD66c, CEACAM6; carcinoembryonic antigen-related cell adhesion molecule 6 [HSA:4680]
tr|F1MU33|F1MU33_BOVIN K06499 CD66c, CEACAM6; carcinoembryonic antigen-related cell adhesion molecule 6 [HSA:4680]
tr|F1N2U9|F1N2U9_BOVIN K06499 CD66c, CEACAM6; carcinoembryonic antigen-related cell adhesion molecule 6 [HSA:4680]
tr|E1BKM1|E1BKM1_BOVIN K06499 CD66d, CEACAM3; carcinoembryonic antigen-related cell adhesion molecule 3 [HSA:1084]
tr|F1MU33|F1MU33_BOVIN K06499 CD66d, CEACAM3; carcinoembryonic antigen-related cell adhesion molecule 3 [HSA:1084]
tr|F1N2U9|F1N2U9_BOVIN K06499 CD66d, CEACAM3; carcinoembryonic antigen-related cell adhesion molecule 3 [HSA:1084]
tr|E1BKM1|E1BKM1_BOVIN K06499 CD66e, CEACAM5; carcinoembryonic antigen-related cell adhesion molecule 5 [HSA:1048]
tr|F1MU33|F1MU33_BOVIN K06499 CD66e, CEACAM5; carcinoembryonic antigen-related cell adhesion molecule 5 [HSA:1048]
tr|F1N2U9|F1N2U9_BOVIN K06499 CD66e, CEACAM5; carcinoembryonic antigen-related cell adhesion molecule 5 [HSA:1048]
tr|E1BIG6|E1BIG6_BOVIN K06503 CD71, TFRC; transferrin receptor (p90, CD71) [HSA:7037]
tr|E1BPB4|E1BPB4_BOVIN K06504 CD72; CD72 antigen [HSA:971]
sp|Q05927|5NTD_BOVIN K19970 CD73, NT5E; 5'-nucleotidase, ecto (CD73) [HSA:4907]
tr|O46405|O46405_BOVIN K05412 CD80; CD80 antigen (CD28 antigen ligand 1, B7-1 antigen) [HSA:941]
tr|A5D7E6|A5D7E6_BOVIN K06509 CD82; kangai 1, suppression of tumorigenicity 6, prostate, CD82 antigen [HSA:3732]
tr|E1BMX1|E1BMX1_BOVIN K06512 CD85a, LILRB3; leukocyte immunoglobulin-like receptor, subfamily B (with TM and ITIM domains), member 3 [HSA:11025]
tr|A6QNN3|A6QNN3_BOVIN K06512 CD85a, LILRB3; leukocyte immunoglobulin-like receptor, subfamily B (with TM and ITIM domains), member 3 [HSA:11025]
tr|E1BFM6|E1BFM6_BOVIN K06512 CD85a, LILRB3; leukocyte immunoglobulin-like receptor, subfamily B (with TM and ITIM domains), member 3 [HSA:11025]
tr|J7RNN4|J7RNN4_BOVIN K06512 CD85a, LILRB3; leukocyte immunoglobulin-like receptor, subfamily B (with TM and ITIM domains), member 3 [HSA:11025]
tr|E1BMX1|E1BMX1_BOVIN K06512 CD85b, LILRB6; leukocyte immunoglobulin-like receptor, subfamily B (with TM and ITIM domains), member 6 [HSA:79168]
tr|A6QNN3|A6QNN3_BOVIN K06512 CD85b, LILRB6; leukocyte immunoglobulin-like receptor, subfamily B (with TM and ITIM domains), member 6 [HSA:79168]
tr|E1BFM6|E1BFM6_BOVIN K06512 CD85b, LILRB6; leukocyte immunoglobulin-like receptor, subfamily B (with TM and ITIM domains), member 6 [HSA:79168]
tr|J7RNN4|J7RNN4_BOVIN K06512 CD85b, LILRB6; leukocyte immunoglobulin-like receptor, subfamily B (with TM and ITIM domains), member 6 [HSA:79168]
tr|E1BMX1|E1BMX1_BOVIN K06512 CD85c, LILRB5; leukocyte immunoglobulin-like receptor, subfamily B (with TM and ITIM domains), member 5 [HSA:10990]
tr|A6QNN3|A6QNN3_BOVIN K06512 CD85c, LILRB5; leukocyte immunoglobulin-like receptor, subfamily B (with TM and ITIM domains), member 5 [HSA:10990]
tr|E1BFM6|E1BFM6_BOVIN K06512 CD85c, LILRB5; leukocyte immunoglobulin-like receptor, subfamily B (with TM and ITIM domains), member 5 [HSA:10990]
tr|J7RNN4|J7RNN4_BOVIN K06512 CD85c, LILRB5; leukocyte immunoglobulin-like receptor, subfamily B (with TM and ITIM domains), member 5 [HSA:10990]
tr|E1BMX1|E1BMX1_BOVIN K06512 CD85d, LILRB2; leukocyte immunoglobulin-like receptor, subfamily B (with TM and ITIM domains), member 2 [HSA:10288]
tr|A6QNN3|A6QNN3_BOVIN K06512 CD85d, LILRB2; leukocyte immunoglobulin-like receptor, subfamily B (with TM and ITIM domains), member 2 [HSA:10288]
tr|E1BFM6|E1BFM6_BOVIN K06512 CD85d, LILRB2; leukocyte immunoglobulin-like receptor, subfamily B (with TM and ITIM domains), member 2 [HSA:10288]
tr|J7RNN4|J7RNN4_BOVIN K06512 CD85d, LILRB2; leukocyte immunoglobulin-like receptor, subfamily B (with TM and ITIM domains), member 2 [HSA:10288]
tr|E1BMX1|E1BMX1_BOVIN K06512 CD85e, LILRA3; leukocyte immunoglobulin-like receptor, subfamily A (without TM domain), member 3 [HSA:11026]
tr|A6QNN3|A6QNN3_BOVIN K06512 CD85e, LILRA3; leukocyte immunoglobulin-like receptor, subfamily A (without TM domain), member 3 [HSA:11026]
tr|E1BFM6|E1BFM6_BOVIN K06512 CD85e, LILRA3; leukocyte immunoglobulin-like receptor, subfamily A (without TM domain), member 3 [HSA:11026]
tr|J7RNN4|J7RNN4_BOVIN K06512 CD85e, LILRA3; leukocyte immunoglobulin-like receptor, subfamily A (without TM domain), member 3 [HSA:11026]
tr|E1BMX1|E1BMX1_BOVIN K06512 CD85f, LILRB7; leukocyte immunoglobulin-like receptor, subfamily A (with TM domain), member 5 [HSA:353514]
tr|A6QNN3|A6QNN3_BOVIN K06512 CD85f, LILRB7; leukocyte immunoglobulin-like receptor, subfamily A (with TM domain), member 5 [HSA:353514]
tr|E1BFM6|E1BFM6_BOVIN K06512 CD85f, LILRB7; leukocyte immunoglobulin-like receptor, subfamily A (with TM domain), member 5 [HSA:353514]
tr|J7RNN4|J7RNN4_BOVIN K06512 CD85f, LILRB7; leukocyte immunoglobulin-like receptor, subfamily A (with TM domain), member 5 [HSA:353514]
tr|E1BMX1|E1BMX1_BOVIN K06512 CD85g, LILRA4; leukocyte immunoglobulin-like receptor, subfamily A (without TM domain), member 4 [HSA:23547]
tr|A6QNN3|A6QNN3_BOVIN K06512 CD85g, LILRA4; leukocyte immunoglobulin-like receptor, subfamily A (without TM domain), member 4 [HSA:23547]
tr|E1BFM6|E1BFM6_BOVIN K06512 CD85g, LILRA4; leukocyte immunoglobulin-like receptor, subfamily A (without TM domain), member 4 [HSA:23547]
tr|J7RNN4|J7RNN4_BOVIN K06512 CD85g, LILRA4; leukocyte immunoglobulin-like receptor, subfamily A (without TM domain), member 4 [HSA:23547]
tr|E1BMX1|E1BMX1_BOVIN K06512 CD85h, LILRA2; leukocyte immunoglobulin-like receptor, subfamily A (with TM domain), member 2 [HSA:11027]
tr|A6QNN3|A6QNN3_BOVIN K06512 CD85h, LILRA2; leukocyte immunoglobulin-like receptor, subfamily A (with TM domain), member 2 [HSA:11027]
tr|E1BFM6|E1BFM6_BOVIN K06512 CD85h, LILRA2; leukocyte immunoglobulin-like receptor, subfamily A (with TM domain), member 2 [HSA:11027]
tr|J7RNN4|J7RNN4_BOVIN K06512 CD85h, LILRA2; leukocyte immunoglobulin-like receptor, subfamily A (with TM domain), member 2 [HSA:11027]
tr|E1BMX1|E1BMX1_BOVIN K06512 CD85i, LILRA1; leukocyte immunoglobulin-like receptor, subfamily A (with TM domain), member 1 [HSA:11024]
tr|A6QNN3|A6QNN3_BOVIN K06512 CD85i, LILRA1; leukocyte immunoglobulin-like receptor, subfamily A (with TM domain), member 1 [HSA:11024]
tr|E1BFM6|E1BFM6_BOVIN K06512 CD85i, LILRA1; leukocyte immunoglobulin-like receptor, subfamily A (with TM domain), member 1 [HSA:11024]
tr|J7RNN4|J7RNN4_BOVIN K06512 CD85i, LILRA1; leukocyte immunoglobulin-like receptor, subfamily A (with TM domain), member 1 [HSA:11024]
tr|E1BMX1|E1BMX1_BOVIN K06512 CD85j, LILRB1; leukocyte immunoglobulin-like receptor, subfamily B (with TM and ITIM domains), member 1 [HSA:10859]
tr|A6QNN3|A6QNN3_BOVIN K06512 CD85j, LILRB1; leukocyte immunoglobulin-like receptor, subfamily B (with TM and ITIM domains), member 1 [HSA:10859]
tr|E1BFM6|E1BFM6_BOVIN K06512 CD85j, LILRB1; leukocyte immunoglobulin-like receptor, subfamily B (with TM and ITIM domains), member 1 [HSA:10859]
tr|J7RNN4|J7RNN4_BOVIN K06512 CD85j, LILRB1; leukocyte immunoglobulin-like receptor, subfamily B (with TM and ITIM domains), member 1 [HSA:10859]
tr|E1BMX1|E1BMX1_BOVIN K06512 CD85k, LILRB4; leukocyte immunoglobulin-like receptor, subfamily B (with TM and ITIM domains), member 4 [HSA:11006]
tr|A6QNN3|A6QNN3_BOVIN K06512 CD85k, LILRB4; leukocyte immunoglobulin-like receptor, subfamily B (with TM and ITIM domains), member 4 [HSA:11006]
tr|E1BFM6|E1BFM6_BOVIN K06512 CD85k, LILRB4; leukocyte immunoglobulin-like receptor, subfamily B (with TM and ITIM domains), member 4 [HSA:11006]
tr|J7RNN4|J7RNN4_BOVIN K06512 CD85k, LILRB4; leukocyte immunoglobulin-like receptor, subfamily B (with TM and ITIM domains), member 4 [HSA:11006]
tr|Q9GL33|Q9GL33_BOVIN K05413 CD86; CD86 antigen (CD28 antigen ligand 2, B7-2 antigen) [HSA:942]
sp|Q05588|UPAR_BOVIN K03985 CD87, PLAUR; plasminogen activator, urokinase receptor [HSA:5329]
tr|L8IAR7|L8IAR7_9CETA K04010 CD88, C5R1; complement component 5 receptor 1 (C5a ligand) [HSA:728]
tr|E1BGJ0|E1BGJ0_BOVIN K04550 CD91, LRP1; low density lipoprotein-related protein 1 (alpha-2-macroglobulin receptor) [HSA:4035]
tr|E1BIP2|E1BIP2_BOVIN K06515 CD92, SLC44A1; solute carrier family 44, member 1 [HSA:23446]
sp|Q3MHP9|TACT_BOVIN K06517 CD96; CD96 antigen [HSA:10225]
tr|F1MCN3|F1MCN3_BOVIN K08446 CD97; CD97 antigen [HSA:976]
tr|E1BDM5|E1BDM5_BOVIN K06521 CD100, SEMA4D; sema domain, immunoglobulin domain (Ig), transmembrane domain (TM) and short cytoplasmic domain, (semaphorin) 4D [HSA:10507]
tr|A6QLV9|A6QLV9_BOVIN K06521 CD100, SEMA4D; sema domain, immunoglobulin domain (Ig), transmembrane domain (TM) and short cytoplasmic domain, (semaphorin) 4D [HSA:10507]
tr|E1BF41|E1BF41_BOVIN K06521 CD100, SEMA4D; sema domain, immunoglobulin domain (Ig), transmembrane domain (TM) and short cytoplasmic domain, (semaphorin) 4D [HSA:10507]
tr|F1MYZ4|F1MYZ4_BOVIN K06521 CD100, SEMA4D; sema domain, immunoglobulin domain (Ig), transmembrane domain (TM) and short cytoplasmic domain, (semaphorin) 4D [HSA:10507]
tr|F1MCK5|F1MCK5_BOVIN K06522 CD101, IGSF2; immunoglobulin superfamily, member 2 [HSA:9398]
tr|F1MJ00|F1MJ00_BOVIN K06522 CD101, IGSF2; immunoglobulin superfamily, member 2 [HSA:9398]
tr|E1BFX5|E1BFX5_BOVIN K06524 CD103, ITGAE; integrin, alpha E [HSA:3682]
tr|E1B864|E1B864_BOVIN K06525 CD104, ITGB4; integrin, beta 4 [HSA:3691]
tr|Q1RMV1|Q1RMV1_BOVIN K06526 CD105, ENG; endoglin (Osler-Rendu-Weber syndrome 1) [HSA:2022]
tr|Q9GKR3|Q9GKR3_BOVIN K06527 CD106, VCAM1; vascular cell adhesion molecule 1 [HSA:7412]
sp|Q05204|LAMP1_BOVIN K06528 CD107a, LAMP1; lysosomal-associated membrane protein 1 [HSA:3916]
sp|Q05204|LAMP1_BOVIN K06528 CD107b, LAMP2; lysosomal-associated membrane protein 2 [HSA:3920]
tr|F1MPE1|F1MPE1_BOVIN K06530 CD109; CD109 antigen (Gov platelet alloantigens) [HSA:135228]
tr|F1MX79|F1MX79_BOVIN K05082 CD110, MPL; myeloproliferative leukemia virus oncogene [HSA:4352]
tr|F1MQJ3|F1MQJ3_BOVIN K06081 CD111, PVRL1; poliovirus receptor-related 1 (herpesvirus entry mediator C, nectin) [HSA:5818]
tr|L8IA51|L8IA51_9CETA K06531 CD112, PVRL2; poliovirus receptor-related 2 (herpesvirus entry mediator B) [HSA:5819]
tr|F1MUF6|F1MUF6_BOVIN K06592 CD113, PVRL3; poliovirus receptor-related 3 [HSA:25945]
tr|G3MXS9|G3MXS9_BOVIN K05066 CD116, CSF2RA; colony stimulating factor 2 receptor, alpha, low-affinity (granulocyte-macrophage) [HSA:1438]
sp|P43481|KIT_BOVIN K05091 CD117, KIT; v-kit Hardy-Zuckerman 4 feline sarcoma viral oncogene homolog [HSA:3815]
tr|F1ML75|F1ML75_BOVIN K04386 CD121a, IL1R1; interleukin 1 receptor, type I [HSA:3554]
tr|F1MTF9|F1MTF9_BOVIN K05073 CD129, IL9R; interleukin 9 receptor [HSA:3581]
tr|E1BD36|E1BD36_BOVIN K05060 CD130, IL6ST; interleukin 6 signal transducer (gp130, oncostatin M receptor) [HSA:3572]
tr|E9LZ03|E9LZ03_BOVIN K06532 CD133, PROM1; prominin 1 [HSA:8842]
tr|F1MRU0|F1MRU0_BOVIN K05092 CD135, FLT3; fms-related tyrosine kinase 3 [HSA:2322]
tr|F1MX49|F1MX49_BOVIN K04363 CD140a, PDGFRA; platelet-derived growth factor receptor, alpha polypeptide [HSA:5156]
sp|P30931|TF_BOVIN K03901 CD142, F3; coagulation factor III (thromboplastin, tissue factor) [HSA:2152]
tr|F1MR35|F1MR35_BOVIN K01283 CD143, ACE; angiotensin I converting enzyme (peptidyl-dipeptidase A) 1 [HSA:1636]
sp|Q6URK6|CADH5_BOVIN K06533 CD144, CDH5; cadherin 5, type 2, VE-cadherin (vascular epithelium) [HSA:1003]
sp|Q865R3|BASI_BOVIN K06535 CD147, BSG; basigin (OK blood group) [HSA:682]
tr|L8IR22|L8IR22_9CETA K06535 CD147, BSG; basigin (OK blood group) [HSA:682]
tr|Q95MM6|Q95MM6_BOVIN K06536 CD150, SLAMF1; signaling lymphocytic activation molecule family member 1 [HSA:6504]
tr|F1MIY8|F1MIY8_BOVIN K06540 CD156a, ADAM8; a disintegrin and metalloproteinase domain 8 [HSA:101]
sp|Q10741|ADA10_BOVIN K06704 CD156c, ADAM10; a disintegrin and metalloproteinase domain 10 [HSA:102]
tr|F1MLP3|F1MLP3_BOVIN K18152 CD157, BST1; bone marrow stromal cell antigen 1 [HSA:683]
tr|G5E5R9|G5E5R9_BOVIN K07980 CD158e, KIR3DL1; killer cell immunoglobulin-like receptor, three domains, long cytoplasmic tail, 1 [HSA:3811]
tr|G5E5R9|G5E5R9_BOVIN K07980 CD158k, KIR3DL2; killer cell immunoglobulin-like receptor, three domains, long cytoplasmic tail, 3 [HSA:3812]
tr|A3R3C1|A3R3C1_BOVIN K06541 CD159a, KLRC1; killer cell lectin-like receptor subfamily C, member 1 [HSA:3821]
tr|A3R3C1|A3R3C1_BOVIN K06541 CD159c, KLRC2; killer cell lectin-like receptor subfamily C, member 2 [HSA:3822]
sp|P30205|WC11_BOVIN K06545 CD163; CD163 antigen [HSA:9332]
tr|G1FM83|G1FM83_BOVIN K06545 CD163; CD163 antigen [HSA:9332]
tr|B6ULW9|B6ULW9_BOVIN K06545 CD163; CD163 antigen [HSA:9332]
tr|G1FM81|G1FM81_BOVIN K06545 CD163; CD163 antigen [HSA:9332]
tr|G1FM80|G1FM80_BOVIN K06545 CD163; CD163 antigen [HSA:9332]
tr|I6TS18|I6TS18_BOVIN K06545 CD163; CD163 antigen [HSA:9332]
sp|P85521|C163A_BOVIN K06545 CD163; CD163 antigen [HSA:9332]
tr|G5E5D7|G5E5D7_BOVIN K06545 CD163; CD163 antigen [HSA:9332]
sp|P30205|WC11_BOVIN K06545 CD163b; Scavenger receptor cysteine-rich type 1 protein M160 [HSA:283316]
tr|G1FM83|G1FM83_BOVIN K06545 CD163b; Scavenger receptor cysteine-rich type 1 protein M160 [HSA:283316]
tr|B6ULW9|B6ULW9_BOVIN K06545 CD163b; Scavenger receptor cysteine-rich type 1 protein M160 [HSA:283316]
tr|G1FM81|G1FM81_BOVIN K06545 CD163b; Scavenger receptor cysteine-rich type 1 protein M160 [HSA:283316]
tr|G1FM80|G1FM80_BOVIN K06545 CD163b; Scavenger receptor cysteine-rich type 1 protein M160 [HSA:283316]
tr|I6TS18|I6TS18_BOVIN K06545 CD163b; Scavenger receptor cysteine-rich type 1 protein M160 [HSA:283316]
sp|P85521|C163A_BOVIN K06545 CD163b; Scavenger receptor cysteine-rich type 1 protein M160 [HSA:283316]
tr|G5E5D7|G5E5D7_BOVIN K06545 CD163b; Scavenger receptor cysteine-rich type 1 protein M160 [HSA:283316]
tr|E1BBP4|E1BBP4_BOVIN K05124 CD167a, DDR1; discoidin domain receptor family, member 1 [HSA:780]
tr|F1N331|F1N331_BOVIN K06267 CD168, HMMR; hyaluronan-mediated motility receptor (RHAMM) [HSA:3161]
tr|E1BGL8|E1BGL8_BOVIN K06548 CD169, SN; sialoadhesin [HSA:6614]
tr|E1BC44|E1BC44_BOVIN K06549 CD170, SIGLEC5; sialic acid binding Ig-like lectin 5 [HSA:8778]
tr|E1BBI3|E1BBI3_BOVIN K06550 CD171, L1CAM; L1 cell adhesion molecule (MASA syndrome, spastic paraplegia 1) [HSA:3897]
tr|F1MD75|F1MD75_BOVIN K06551 CD172a, PTPNS1; protein tyrosine phosphatase, non-receptor type substrate 1 [HSA:140885]
tr|Q70MK5|Q70MK5_BOVIN K06551 CD172a, PTPNS1; protein tyrosine phosphatase, non-receptor type substrate 1 [HSA:140885]
tr|F1MD75|F1MD75_BOVIN K06551 CD172b, SIRPB1; signal-regulatory protein beta 1 [HSA:10326]
tr|Q70MK5|Q70MK5_BOVIN K06551 CD172b, SIRPB1; signal-regulatory protein beta 1 [HSA:10326]
tr|F1MD75|F1MD75_BOVIN K06551 CD172g, SIRPB2; signal-regulatory protein beta 2 [HSA:55423]
tr|Q70MK5|Q70MK5_BOVIN K06551 CD172g, SIRPB2; signal-regulatory protein beta 2 [HSA:55423]
tr|A6QNK7|A6QNK7_BOVIN K06555 CD180; lymphocyte antigen 64 homolog, radioprotective 105kDa (mouse) [HSA:4064]
tr|D9ZDE1|D9ZDE1_BOVIN K04181 CD196, CCR6; chemokine (C-C motif) receptor 6 [HSA:1235]
tr|A4IF92|A4IF92_BOVIN K04184 CDw199, CCR9; chemokine (C-C motif) receptor 9 [HSA:10803]
sp|Q06807|TIE2_BOVIN K05121 CD202b, TEK; TEK tyrosine kinase, endothelial [HSA:7010]
tr|F1MNS5|F1MNS5_BOVIN K01513 CD203a, ENPP1; ectonucleotide pyrophosphatase/phosphodiesterase 1 [HSA:5167]
tr|F1MNS5|F1MNS5_BOVIN K01513 CD203c, ENPP3; ectonucleotide pyrophosphatase/phosphodiesterase 3 [HSA:5169]
tr|E1BC77|E1BC77_BOVIN K06559 CD205, LY75; lymphocyte antigen 75 [HSA:4065]
sp|P49259|PLA2R_BOVIN K06560 CD206, MRC1; mannose receptor, C type 1 [HSA:4360]
tr|F1MWM8|F1MWM8_BOVIN K06560 CD206, MRC1; mannose receptor, C type 1 [HSA:4360]
tr|F1MPD1|F1MPD1_BOVIN K06560 CD206, MRC1; mannose receptor, C type 1 [HSA:4360]
tr|E1BB51|E1BB51_BOVIN K06561 CD207; CD207 antigen, langerin [HSA:50489]
tr|L8IRE9|L8IRE9_9CETA K05135 CDw210b, IL10RB; interleukin 10 receptor, beta [HSA:3588]
tr|F1N2C5|F1N2C5_BOVIN K05164 CD217, IL17R; interleukin 17 receptor [HSA:23765]
tr|F1MV64|F1MV64_BOVIN K04527 CD220, INSR; insulin receptor [HSA:3643]
tr|F1MIE6|F1MIE6_BOVIN K06564 CD222, IGF2R; insulin-like growth factor 2 receptor [HSA:3482]
tr|E1B7C1|E1B7C1_BOVIN K06565 CD223, LAG3; lymphocyte-activation gene 3 [HSA:3902]
tr|G3N2D8|G3N2D8_BOVIN K18592 CD224, GGT1; gamma-glutamyltransferase 1 [HSA:2678]
sp|B5SY89|PRIO_BOBOX K05634 CD230, PRNP; prion protein [HSA:5621]
tr|E1BDY7|E1BDY7_BOVIN K06572 CD232, PLXNC1; plexin C1 [HSA:10154]
tr|L8HTQ2|L8HTQ2_9CETA K06573 CD233, SLC4A1; solute carrier family 4, anion exchanger, member 1 [HSA:6521]
tr|F1N2Q4|F1N2Q4_BOVIN K06577 CD238, KEL; Kell blood group [HSA:3792]
sp|Q9MZ08|BCAM_BOVIN K06578 CD239, LU; Lutheran blood group (Auberger b antigen included) [HSA:4059]
sp|Q2T9S6|RHCG_BOVIN K06580 CD241, RHAG; Rhesus blood group-associated glycoprotein [HSA:6005]
tr|F1MJU4|F1MJU4_BOVIN K05658 CD243, ABCB1; ATP-binding cassette, sub-family B (MDR/TAP), member 1 [HSA:5243]
tr|G3X771|G3X771_BOVIN K05658 CD243, ABCB1; ATP-binding cassette, sub-family B (MDR/TAP), member 1 [HSA:5243]
tr|E1BC38|E1BC38_BOVIN K06706 CD248; CD164 sialomucin-like 1 [HSA:57124]
sp|Q32LQ0|AMPE_BOVIN K11141 CD249, ENPEP; glutamyl aminopeptidase (aminopeptidase A) [HSA:2028]
tr|E1BE56|E1BE56_BOVIN K04721 CD253, TNFSF10; tumor necrosis factor (ligand) superfamily, member 10 [HSA:8743]
tr|E1BIP0|E1BIP0_BOVIN K05473 CD254, TNFSF11; tumor necrosis factor (ligand) superfamily, member 11 [HSA:8600]
tr|G3MZC6|G3MZC6_BOVIN K04722 CD261, TNFRSF10A; tumor necrosis factor receptor superfamily, member 10a [HSA:8797]
tr|G3MZC6|G3MZC6_BOVIN K04722 CD262, TNFRSF10B; tumor necrosis factor receptor superfamily, member 10b [HSA:8795]
tr|G3MZC6|G3MZC6_BOVIN K04722 CD263, TNFRSF10C; tumor necrosis factor receptor superfamily, member 10c, decoy without an intracellular domain [HSA:8794]
tr|G3MZC6|G3MZC6_BOVIN K04722 CD264, TNFRSF10D; tumor necrosis factor receptor superfamily, member 10d, decoy with truncated death domain [HSA:8793]
tr|F1MJD0|F1MJD0_BOVIN K05151 CD268, TNFRSF13C; tumor necrosis factor receptor superfamily, member 13C [HSA:115650]
tr|E1BCU8|E1BCU8_BOVIN K06710 CD275, ICOSLG; inducible T-cell co-stimulator ligand [HSA:23308]
sp|P18892|BT1A1_BOVIN K06712 CD277, BTN3A1; butyrophilin, subfamily 3, member A1 [HSA:11119]
tr|F1MX97|F1MX97_BOVIN K06712 CD277, BTN3A1; butyrophilin, subfamily 3, member A1 [HSA:11119]
tr|A2VE28|A2VE28_BOVIN K06712 CD277, BTN3A1; butyrophilin, subfamily 3, member A1 [HSA:11119]
tr|F1MZI6|F1MZI6_BOVIN K06712 CD277, BTN3A1; butyrophilin, subfamily 3, member A1 [HSA:11119]
tr|G3N1U8|G3N1U8_BOVIN K06712 CD277, BTN3A1; butyrophilin, subfamily 3, member A1 [HSA:11119]
sp|P49259|PLA2R_BOVIN K06560 CD280, MRC2; mannose receptor, C type 2 [HSA:9902]
tr|F1MWM8|F1MWM8_BOVIN K06560 CD280, MRC2; mannose receptor, C type 2 [HSA:9902]
tr|F1MPD1|F1MPD1_BOVIN K06560 CD280, MRC2; mannose receptor, C type 2 [HSA:9902]
sp|Q5TJ59|TLR3_BOVIN K05401 CD283, TLR3; toll-like receptor 3 [HSA:7098]
sp|Q9GL65|TLR4_BOVIN K10160 CD284, TLR4; toll-like receptor 4 [HSA:7099]
sp|Q704V6|TLR6_BOVIN K10169 CD286, TLR6; toll-like receptor 6 [HSA:10333]
tr|A0A0A0YW44|A0A0A0YW44_BOSMU K10170 CD288, TLR8; toll-like receptor 8 [HSA:51311]
tr|E1BAP6|E1BAP6_BOVIN K06716 CD296, ART1; ADP-ribosyltransferase 1 [HSA:417]
tr|Q3ZCH8|Q3ZCH8_BOVIN K01540 CD298, ATP1B3; ATPase, Na+/K+ transporting, beta 3 polypeptide [HSA:483]
tr|E1BEM6|E1BEM6_BOVIN K06719 CD300a; leukocyte membrane antigen [HSA:11314]
tr|F1MD89|F1MD89_BOVIN K06719 CD300a; leukocyte membrane antigen [HSA:11314]
tr|E1BEM6|E1BEM6_BOVIN K06719 CD300c; CMRF35 leukocyte immunoglobulin-like receptor [HSA:10871]
tr|F1MD89|F1MD89_BOVIN K06719 CD300c; CMRF35 leukocyte immunoglobulin-like receptor [HSA:10871]
tr|F1MRL2|F1MRL2_BOVIN K06727 CD307a, FCRL1; Fc receptor-like 1 [HSA:115350]
tr|G3MXQ1|G3MXQ1_BOVIN K06727 CD307a, FCRL1; Fc receptor-like 1 [HSA:115350]
tr|F1MLF3|F1MLF3_BOVIN K06727 CD307a, FCRL1; Fc receptor-like 1 [HSA:115350]
tr|F1MRL2|F1MRL2_BOVIN K06727 CD307b, FCRL2; Fc receptor-like 2 [HSA:79368]
tr|G3MXQ1|G3MXQ1_BOVIN K06727 CD307b, FCRL2; Fc receptor-like 2 [HSA:79368]
tr|F1MLF3|F1MLF3_BOVIN K06727 CD307b, FCRL2; Fc receptor-like 2 [HSA:79368]
tr|F1MRL2|F1MRL2_BOVIN K06727 CD307c, FCRL3; Fc receptor-like 3 [HSA:115352]
tr|G3MXQ1|G3MXQ1_BOVIN K06727 CD307c, FCRL3; Fc receptor-like 3 [HSA:115352]
tr|F1MLF3|F1MLF3_BOVIN K06727 CD307c, FCRL3; Fc receptor-like 3 [HSA:115352]
tr|F1MRL2|F1MRL2_BOVIN K06727 CD307d, FCRL4; Fc receptor-like 4 [HSA:83417]
tr|G3MXQ1|G3MXQ1_BOVIN K06727 CD307d, FCRL4; Fc receptor-like 4 [HSA:83417]
tr|F1MLF3|F1MLF3_BOVIN K06727 CD307d, FCRL4; Fc receptor-like 4 [HSA:83417]
tr|F1MRL2|F1MRL2_BOVIN K06727 CD307e, FCRL5; Fc receptor-like 5 [HSA:83416]
tr|G3MXQ1|G3MXQ1_BOVIN K06727 CD307e, FCRL5; Fc receptor-like 5 [HSA:83416]
tr|F1MLF3|F1MLF3_BOVIN K06727 CD307e, FCRL5; Fc receptor-like 5 [HSA:83416]
tr|F1MWF1|F1MWF1_BOVIN K05098 CD309, KDR; kinase insert domain receptor (a type III receptor tyrosine kinase) [HSA:3791]
tr|Q1XF12|Q1XF12_BOVIN K06728 CD314, KLRK1; killer cell lectin-like receptor subfamily K, member 1 [HSA:22914]
tr|A2VE11|A2VE11_BOVIN K06730 CD316, IGSF8; immunoglobulin superfamily, member 8 [HSA:93185]
tr|F1N713|F1N713_BOVIN K06731 CD317, BST2; bone marrow stromal cell antigen 2 [HSA:684]
tr|G3N093|G3N093_BOVIN K06732 CD318, CDCP1; CUB domain-containing protein 1 [HSA:64866]
tr|F1MIE5|F1MIE5_BOVIN K06733 CD319, SLAMF7; SLAM family member 7 [HSA:57823]
sp|Q6R8F2|CADH1_BOVIN K05689 CD324, CDH1; cadherin 1, type 1, E-cadherin (epithelial) [HSA:999]
sp|P19534|CADH2_BOVIN K06736 CD325, CDH2; cadherin 2, type 1, N-cadherin (neuronal) [HSA:1000]
tr|J9QCT9|J9QCT9_BOVIN K05093 CD332, FGFR2; fibroblast growth factor receptor 2 [HSA:2263]
tr|J9QCT8|J9QCT8_BOVIN K05093 CD332, FGFR2; fibroblast growth factor receptor 2 [HSA:2263]
tr|F1MN51|F1MN51_BOVIN K05095 CD334, FGFR4; fibroblast growth factor receptor 4 [HSA:2264]
sp|Q4GZT4|ABCG2_BOVIN K05681 CD338, ABCG2; ATP-binding cassette, sub-family G (WHITE), member 2 [HSA:9429]
tr|H9ZHQ8|H9ZHQ8_BOVIN K05681 CD338, ABCG2; ATP-binding cassette, sub-family G (WHITE), member 2 [HSA:9429]
tr|F1MCQ7|F1MCQ7_BOVIN K05083 CD340, ERBB2; v-erb-b2 erythroblastic leukemia viral oncogene homolog 2 [HSA:2064]
tr|A3KMX5|A3KMX5_BOVIN K02842 CD349, FZD9; frizzled homolog 9 (Drosophila) [HSA:8326]
tr|A3KMX5|A3KMX5_BOVIN K02842 CD350, FZD10; frizzled homolog 10 (Drosophila) [HSA:11211]
tr|E1BM11|E1BM11_BOVIN K16853 CD353, SLAMF8; SLAM family member 8 [HSA:56833]
tr|A7YWT5|A7YWT5_BOVIN K16361 CD355, CRTAM; cytotoxic and regulatory T cell molecule [HSA:56253]
sp|Q5E9P3|S1PR1_BOVIN K04288 CD363, S1PR1; sphingosine-1-phosphate receptor 1 [HSA:1901]
sp|Q58D34|PI16_BOVIN K20412 CD364, PI16; peptidase inhibitor 16 [HSA:221476]
tr|E1BKB0|E1BKB0_BOVIN K17515 CD370, CLEC9A; C-type lectin domain family 9 member A [HSA:283420]

## Sheet: Cell adhesion molecules
Cell adhesion molecules and their ligands (193)
1. Immunoglobulin Superfamily
Immune system
B7-CD28 family
CD28; CD28 antigen [KO:K06470]
tr|O46405|O46405_BOVIN K05412 CD80; CD80 antigen	Cell adhesion molecules (CAMs)
tr|Q9GL33|Q9GL33_BOVIN K05413 CD86; CD86 antigen	Cell adhesion molecules (CAMs)
tr|E1BCU8|E1BCU8_BOVIN K06710 ICOSLG, ICOSL, CD275; inducible T-cell co-stimulator ligand	Cell adhesion molecules (CAMs)
CTLA4, CD152; cytotoxic T-lymphocyte-associated protein 4 [KO:K06538]
tr|O46405|O46405_BOVIN K05412 CD80; CD80 antigen	Cell adhesion molecules (CAMs)
tr|Q9GL33|Q9GL33_BOVIN K05413 CD86; CD86 antigen	Cell adhesion molecules (CAMs)
tr|E1BCU8|E1BCU8_BOVIN K06710 ICOSLG, ICOSL, CD275; inducible T-cell co-stimulator ligand	Cell adhesion molecules (CAMs)
PDCD1LG1, CD274; programmed cell death 1 ligand 1 [KO:K06745]
tr|O46405|O46405_BOVIN K05412 CD80; CD80 antigen	Cell adhesion molecules (CAMs)
ICOS, AILIM; inducible T-cell co-stimulator [KO:K06713]
tr|E1BCU8|E1BCU8_BOVIN K06710 ICOSLG, ICOSL, CD275; inducible T-cell co-stimulator ligand	Cell adhesion molecules (CAMs)
TIGIT; T-cell immunoreceptor with Ig and ITIM domains [KO:K16350]
tr|L8IA51|L8IA51_9CETA K06531 PVRL2, CD112; poliovirus receptor-related protein 2	Cell adhesion molecules (CAMs)
tr|F1MUF6|F1MUF6_BOVIN K06592 PVRL3, CD113; poliovirus receptor-related protein 3	Cell adhesion molecules (CAMs)
CD2 family
CD2; CD2 antigen [KO:K06449]
tr|A7YW37|A7YW37_BOVIN K06492 CD58, LFA3; CD58 antigen	Cell adhesion molecules (CAMs)
tr|L8IWY0|L8IWY0_9CETA K04008 CD59; CD59 antigen	Other cell surface / pericellular molecules
CD48, BCM1; CD48 antigen [KO:K06479]
tr|Q3ZCM0|Q3ZCM0_BOVIN K05856 LCK; lymphocyte cell-specific protein tyrosine kinase [EC:2.7.10.2]	Soluble ligands
sp|A0JNB0|FYN_BOVIN K05703 FYN; tyrosine-protein kinase Fyn [EC:2.7.10.2]	Soluble ligands
SLAMF1, CD150; signaling lymphocytic activation molecule family member 1 [KO:K06536]
tr|Q95MM6|Q95MM6_BOVIN K06536 SLAMF1, CD150; signaling lymphocytic activation molecule family member 1	Cell adhesion molecules (CAMs)
SLAMF7; SLAM family member 7 [KO:K06733]
tr|F1MIE5|F1MIE5_BOVIN K06733 SLAMF7, CD319; SLAM family member 7	Cell adhesion molecules (CAMs)
ICAM family
ICAM1; intercellular adhesion molecule 1 [KO:K06490]
LFA-1	Cell adhesion molecules (CAMs)
sp|P61625|ITAL_BOVIN K05718 ITGAL, CD11a; integrin alpha L
sp|P32592|ITB2_BOVIN K06464 ITGB2, CD18; integrin beta 2
CR3, Mac-1	Cell adhesion molecules (CAMs)
tr|Q24LN2|Q24LN2_BOVIN K06461 ITGAM, CD11b; integrin alpha M
sp|P32592|ITB2_BOVIN K06464 ITGB2, CD18; integrin beta 2
ICAM2; intercellular adhesion molecule 2 [KO:K06523]
LFA-1	Cell adhesion molecules (CAMs)
sp|P61625|ITAL_BOVIN K05718 ITGAL, CD11a; integrin alpha L
sp|P32592|ITB2_BOVIN K06464 ITGB2, CD18; integrin beta 2
CR3, Mac-1	Cell adhesion molecules (CAMs)
tr|Q24LN2|Q24LN2_BOVIN K06461 ITGAM, CD11b; integrin alpha M
sp|P32592|ITB2_BOVIN K06464 ITGB2, CD18; integrin beta 2
ICAM3; intercellular adhesion molecule 3 [KO:K06486]
LFA-1	Cell adhesion molecules (CAMs)
sp|P61625|ITAL_BOVIN K05718 ITGAL, CD11a; integrin alpha L
sp|P32592|ITB2_BOVIN K06464 ITGB2, CD18; integrin beta 2
alpha D beta 2	Cell adhesion molecules (CAMs)
tr|F1N6B8|F1N6B8_BOVIN K06594 ITGAD, CD11d; integrin alpha D
sp|P32592|ITB2_BOVIN K06464 ITGB2, CD18; integrin beta 2
SIGLEC family
CD22, SIGLEC2; CD22 antigen [KO:K06467]
tr|F1MJS9|F1MJS9_BOVIN K06478 PTPRC, CD45; receptor-type tyrosine-protein phosphatase C [EC:3.1.3.48]	Other cell surface / pericellular molecules
MHC
MHC1; major histocompatibility complex, class I [KO:K06751]
sp|P31783|CD8A_BOVIN K06458 CD8A; T-cell surface glycoprotein CD8 alpha chain	Cell adhesion molecules (CAMs)
MHC2; major histocompatibility complex, class II [KO:K06752]
tr|I0J0J9|I0J0J9_BOVIN K06454 CD4; T-cell surface glycoprotein CD4	Cell adhesion molecules (CAMs)
tr|E1B7C1|E1B7C1_BOVIN K06565 LAG3, CD223; lymphocyte-activation gene 3 protein	Cell adhesion molecules (CAMs)
Others
ALCAM; activated leukocyte cell adhesion molecule [KO:K06547]
tr|F1MU15|F1MU15_BOVIN K06456 CD6; T-cell surface glycoprotein CD6	Other cell surface / pericellular molecules
CD4; CD4 antigen [KO:K06454]
tr|Q3LUK5|Q3LUK5_BOVIN K06752 MHC2; major histocompatibility complex, class II	Cell adhesion molecules (CAMs)
tr|Q30300|Q30300_BOVIN K06752 MHC2; major histocompatibility complex, class II	Cell adhesion molecules (CAMs)
tr|Q32S34|Q32S34_BOVIN K06752 MHC2; major histocompatibility complex, class II	Cell adhesion molecules (CAMs)
tr|A6QQE7|A6QQE7_BOVIN K06752 MHC2; major histocompatibility complex, class II	Cell adhesion molecules (CAMs)
tr|F1ML60|F1ML60_BOVIN K06752 MHC2; major histocompatibility complex, class II	Cell adhesion molecules (CAMs)
tr|B7UCT9|B7UCT9_BOVIN K06752 MHC2; major histocompatibility complex, class II	Cell adhesion molecules (CAMs)
CD8A; CD8A antigen, alpha polypeptide [KO:K06458]
tr|A8W3P5|A8W3P5_9CETA K06751 MHC1; major histocompatibility complex, class I	Cell adhesion molecules (CAMs)
tr|Q2TBT0|Q2TBT0_BOVIN K06751 MHC1; major histocompatibility complex, class I	Cell adhesion molecules (CAMs)
tr|O46714|O46714_BOVIN K06751 MHC1; major histocompatibility complex, class I	Cell adhesion molecules (CAMs)
tr|Q3YFG6|Q3YFG6_BOVIN K06751 MHC1; major histocompatibility complex, class I	Cell adhesion molecules (CAMs)
tr|A0A0A0YP11|A0A0A0YP11_BOVIN K06751 MHC1; major histocompatibility complex, class I	Cell adhesion molecules (CAMs)
tr|E1BD63|E1BD63_BOVIN K06751 MHC1; major histocompatibility complex, class I	Cell adhesion molecules (CAMs)
tr|G9HQY8|G9HQY8_BOVIN K06751 MHC1; major histocompatibility complex, class I	Cell adhesion molecules (CAMs)
tr|Q30289|Q30289_BOVIN K06751 MHC1; major histocompatibility complex, class I	Cell adhesion molecules (CAMs)
tr|O78034|O78034_BOVIN K06751 MHC1; major histocompatibility complex, class I	Cell adhesion molecules (CAMs)
tr|G9HQS8|G9HQS8_BOVIN K06751 MHC1; major histocompatibility complex, class I	Cell adhesion molecules (CAMs)
tr|G9HQS7|G9HQS7_BOVIN K06751 MHC1; major histocompatibility complex, class I	Cell adhesion molecules (CAMs)
tr|O46754|O46754_BOVIN K06751 MHC1; major histocompatibility complex, class I	Cell adhesion molecules (CAMs)
tr|W5XQG3|W5XQG3_BOVIN K06751 MHC1; major histocompatibility complex, class I	Cell adhesion molecules (CAMs)
tr|G9HR26|G9HR26_BOVIN K06751 MHC1; major histocompatibility complex, class I	Cell adhesion molecules (CAMs)
tr|G9HR56|G9HR56_BOVIN K06751 MHC1; major histocompatibility complex, class I	Cell adhesion molecules (CAMs)
tr|A0A023JCX1|A0A023JCX1_BOVIN K06751 MHC1; major histocompatibility complex, class I	Cell adhesion molecules (CAMs)
CD8B; CD8B antigen, beta polypeptide 1 [KO:K06459]
tr|A8W3P5|A8W3P5_9CETA K06751 MHC1; major histocompatibility complex, class I	Cell adhesion molecules (CAMs)
tr|Q2TBT0|Q2TBT0_BOVIN K06751 MHC1; major histocompatibility complex, class I	Cell adhesion molecules (CAMs)
tr|O46714|O46714_BOVIN K06751 MHC1; major histocompatibility complex, class I	Cell adhesion molecules (CAMs)
tr|Q3YFG6|Q3YFG6_BOVIN K06751 MHC1; major histocompatibility complex, class I	Cell adhesion molecules (CAMs)
tr|A0A0A0YP11|A0A0A0YP11_BOVIN K06751 MHC1; major histocompatibility complex, class I	Cell adhesion molecules (CAMs)
tr|E1BD63|E1BD63_BOVIN K06751 MHC1; major histocompatibility complex, class I	Cell adhesion molecules (CAMs)
tr|G9HQY8|G9HQY8_BOVIN K06751 MHC1; major histocompatibility complex, class I	Cell adhesion molecules (CAMs)
tr|Q30289|Q30289_BOVIN K06751 MHC1; major histocompatibility complex, class I	Cell adhesion molecules (CAMs)
tr|O78034|O78034_BOVIN K06751 MHC1; major histocompatibility complex, class I	Cell adhesion molecules (CAMs)
tr|G9HQS8|G9HQS8_BOVIN K06751 MHC1; major histocompatibility complex, class I	Cell adhesion molecules (CAMs)
tr|G9HQS7|G9HQS7_BOVIN K06751 MHC1; major histocompatibility complex, class I	Cell adhesion molecules (CAMs)
tr|O46754|O46754_BOVIN K06751 MHC1; major histocompatibility complex, class I	Cell adhesion molecules (CAMs)
tr|W5XQG3|W5XQG3_BOVIN K06751 MHC1; major histocompatibility complex, class I	Cell adhesion molecules (CAMs)
tr|G9HR26|G9HR26_BOVIN K06751 MHC1; major histocompatibility complex, class I	Cell adhesion molecules (CAMs)
tr|G9HR56|G9HR56_BOVIN K06751 MHC1; major histocompatibility complex, class I	Cell adhesion molecules (CAMs)
tr|A0A023JCX1|A0A023JCX1_BOVIN K06751 MHC1; major histocompatibility complex, class I	Cell adhesion molecules (CAMs)
CD226, DNAM1; CD226 antigen [KO:K06567]
tr|L8IA51|L8IA51_9CETA K06531 PVRL2, CD112; poliovirus receptor-related protein 2	Cell adhesion molecules (CAMs)
LFA-1	Cell adhesion molecules (CAMs)
sp|P61625|ITAL_BOVIN K05718 ITGAL, CD11a; integrin alpha L
sp|P32592|ITB2_BOVIN K06464 ITGB2, CD18; integrin beta 2
LAG3; lymphocyte-activation gene 3 protein [KO:K06565]
tr|Q3LUK5|Q3LUK5_BOVIN K06752 MHC2; major histocompatibility complex, class II	Cell adhesion molecules (CAMs)
tr|Q30300|Q30300_BOVIN K06752 MHC2; major histocompatibility complex, class II	Cell adhesion molecules (CAMs)
tr|Q32S34|Q32S34_BOVIN K06752 MHC2; major histocompatibility complex, class II	Cell adhesion molecules (CAMs)
tr|A6QQE7|A6QQE7_BOVIN K06752 MHC2; major histocompatibility complex, class II	Cell adhesion molecules (CAMs)
tr|F1ML60|F1ML60_BOVIN K06752 MHC2; major histocompatibility complex, class II	Cell adhesion molecules (CAMs)
tr|B7UCT9|B7UCT9_BOVIN K06752 MHC2; major histocompatibility complex, class II	Cell adhesion molecules (CAMs)
Neural system
5/2 subfamily
NCAM; neural cell adhesion molecule [KO:K06491]
tr|F1MM03|F1MM03_BOVIN K06491 NCAM, CD56; neural cell adhesion molecule	Cell adhesion molecules (CAMs)
sp|P31836|NCAM1_BOVIN K06491 NCAM, CD56; neural cell adhesion molecule	Cell adhesion molecules (CAMs)
tr|E1BE71|E1BE71_BOVIN K06755 ROBO3; roundabout, axon guidance receptor 3	Cell adhesion molecules (CAMs)
tr|E1BBI3|E1BBI3_BOVIN K06550 L1CAM, CD171; L1 cell adhesion molecule	Cell adhesion molecules (CAMs)
tr|E1BPC9|E1BPC9_BOVIN K06760 CNTN2; contactin 2	Cell adhesion molecules (CAMs)
tr|F1MN51|F1MN51_BOVIN K05095 FGFR4, CD334; fibroblast growth factor receptor 4 [EC:2.7.10.1]	Cell adhesion molecules (CAMs)
tr|F1MSI2|F1MSI2_BOVIN K06254 AGRN; agrin	Extracellular matrix (ECM) components
5/3 subfamily
ROBO1; roundabout, axon guidance receptor 1 [KO:K06753]
tr|F1N739|F1N739_BOVIN K06753 ROBO1; roundabout, axon guidance receptor 1	Cell adhesion molecules (CAMs)
tr|E1BE71|E1BE71_BOVIN K06755 ROBO3; roundabout, axon guidance receptor 3	Cell adhesion molecules (CAMs)
tr|A6H7I1|A6H7I1_BOVIN K06784 ROBO4; roundabout, axon guidance receptor 4	Cell adhesion molecules (CAMs)
tr|F1MLJ7|F1MLJ7_BOVIN K06839 SLIT2; slit 2	Other cell surface / pericellular molecules
ROBO2; roundabout, axon guidance receptor 2 [KO:K06754]
tr|F1MLJ7|F1MLJ7_BOVIN K06839 SLIT2; slit 2	Other cell surface / pericellular molecules
ROBO3; roundabout, axon guidance receptor 3 [KO:K06755]
tr|F1N739|F1N739_BOVIN K06753 ROBO1; roundabout, axon guidance receptor 1	Cell adhesion molecules (CAMs)
tr|E1BE71|E1BE71_BOVIN K06755 ROBO3; roundabout, axon guidance receptor 3	Cell adhesion molecules (CAMs)
tr|F1MM03|F1MM03_BOVIN K06491 NCAM, CD56; neural cell adhesion molecule	Cell adhesion molecules (CAMs)
sp|P31836|NCAM1_BOVIN K06491 NCAM, CD56; neural cell adhesion molecule	Cell adhesion molecules (CAMs)
6/5 subfamily
NRCAM; neuronal cell adhesion molecule [KO:K06756]
tr|E1BLM2|E1BLM2_BOVIN K06756 NRCAM; neuronal cell adhesion molecule	Cell adhesion molecules (CAMs)
tr|G3MYY6|G3MYY6_BOVIN K06757 NFASC; neurofascin	Cell adhesion molecules (CAMs)
sp|Q28106|CNTN1_BOVIN K06759 CNTN1; contactin 1	Cell adhesion molecules (CAMs)
tr|E1BPC9|E1BPC9_BOVIN K06760 CNTN2; contactin 2	Cell adhesion molecules (CAMs)
VLA-4	Cell adhesion molecules (CAMs)
sp|P53712-2|ITB1_BOVIN K05719 ITGB1, CD29; integrin beta 1
tr|E1BEL6|E1BEL6_BOVIN K06819 NRP2; neuropilin 2	Cell adhesion molecules (CAMs)
tr|E1BFR4|E1BFR4_BOVIN K06820 PLXNA; plexin A	Cell adhesion molecules (CAMs)
tr|F1N2P7|F1N2P7_BOVIN K06820 PLXNA; plexin A	Cell adhesion molecules (CAMs)
tr|A1L580|A1L580_BOVIN K06842 SEMA6; semaphorin 6	Other cell surface / pericellular molecules
tr|E1BG65|E1BG65_BOVIN K06842 SEMA6; semaphorin 6	Other cell surface / pericellular molecules
tr|E1BIT8|E1BIT8_BOVIN K06842 SEMA6; semaphorin 6	Other cell surface / pericellular molecules
tr|E1BNY3|E1BNY3_BOVIN K06842 SEMA6; semaphorin 6	Other cell surface / pericellular molecules
tr|E1BN05|E1BN05_BOVIN K16364 GLDN; GLDN; gliomedin	Other cell surface / pericellular molecules
NFASC; neurofascin [KO:K06757]
tr|E1BLM2|E1BLM2_BOVIN K06756 NRCAM; neuronal cell adhesion molecule	Cell adhesion molecules (CAMs)
tr|E1BBI3|E1BBI3_BOVIN K06550 L1CAM, CD171; L1 cell adhesion molecule	Cell adhesion molecules (CAMs)
sp|Q28106|CNTN1_BOVIN K06759 CNTN1; contactin 1	Cell adhesion molecules (CAMs)
tr|E1BN05|E1BN05_BOVIN K16364 GLDN; GLDN; gliomedin	Other cell surface / pericellular molecules
CHL1; L1 cell adhesion molecule like protein [KO:K06758]
tr|E1BEL6|E1BEL6_BOVIN K06819 NRP2; neuropilin 2	Cell adhesion molecules (CAMs)
tr|F1MWU9|F1MWU9_BOVIN K03283 HSPA1s; heat shock 70kDa protein 1/2/6/8	Other cell surface / pericellular molecules
sp|P34933|HSP72_BOVIN K03283 HSPA1s; heat shock 70kDa protein 1/2/6/8	Other cell surface / pericellular molecules
sp|Q27965|HS71B_BOVIN K03283 HSPA1s; heat shock 70kDa protein 1/2/6/8	Other cell surface / pericellular molecules
sp|P0CB32|HS71L_BOVIN K03283 HSPA1s; heat shock 70kDa protein 1/2/6/8	Other cell surface / pericellular molecules
tr|Q2T9P2|Q2T9P2_BOVIN K09525 DNAJC5; DnaJ homolog subfamily C member 5	Other cell surface / pericellular molecules
sp|Q32LM2|SGTA_BOVIN K16365 SGTA; small glutamine-rich tetratricopeptide repeat-containing protein alpha	Other cell surface / pericellular molecules
L1CAM; L1 cell adhesion molecule [KO:K06550]
tr|E1BBI3|E1BBI3_BOVIN K06550 L1CAM, CD171; L1 cell adhesion molecule	Cell adhesion molecules (CAMs)
tr|F1MM03|F1MM03_BOVIN K06491 NCAM, CD56; neural cell adhesion molecule	Cell adhesion molecules (CAMs)
sp|P31836|NCAM1_BOVIN K06491 NCAM, CD56; neural cell adhesion molecule	Cell adhesion molecules (CAMs)
tr|G3MYY6|G3MYY6_BOVIN K06757 NFASC; neurofascin	Cell adhesion molecules (CAMs)
VLA-5	Cell adhesion molecules (CAMs)
tr|F1MK44|F1MK44_BOVIN K06484 ITGA5, CD49e; integrin alpha 5
sp|P53712-2|ITB1_BOVIN K05719 ITGB1, CD29; integrin beta 1
VNR	Cell adhesion molecules (CAMs)
sp|P80746|ITAV_BOVIN K06487 ITGAV, CD51; integrin alpha V
sp|Q28106|CNTN1_BOVIN K06759 CNTN1; contactin 1	Cell adhesion molecules (CAMs)
tr|E1BPC9|E1BPC9_BOVIN K06760 CNTN2; contactin 2	Cell adhesion molecules (CAMs)
tr|A0A0H3U4H5|A0A0H3U4H5_BOSMU K04361 EGFR, ERBB1; epidermal growth factor receptor [EC:2.7.10.1]	Cell adhesion molecules (CAMs)
tr|F1MPK6|F1MPK6_BOVIN K06252 TN; tenascin	Extracellular matrix (ECM) components
tr|E1BB79|E1BB79_BOVIN K06252 TN; tenascin	Extracellular matrix (ECM) components
tr|A0JN60|A0JN60_BOVIN K06252 TN; tenascin	Extracellular matrix (ECM) components
sp|A7MB70|SEM3C_BOVIN K06840 SEMA3; semaphorin 3	Other cell surface / pericellular molecules
tr|F1MGN0|F1MGN0_BOVIN K06840 SEMA3; semaphorin 3	Other cell surface / pericellular molecules
tr|E1B9T2|E1B9T2_BOVIN K06840 SEMA3; semaphorin 3	Other cell surface / pericellular molecules
tr|G3MYK9|G3MYK9_BOVIN K06840 SEMA3; semaphorin 3	Other cell surface / pericellular molecules
tr|F1MEW1|F1MEW1_BOVIN K06840 SEMA3; semaphorin 3	Other cell surface / pericellular molecules
6/4 subfamily
CNTN1; contactin 1 [KO:K06759]
tr|E1BBI3|E1BBI3_BOVIN K06550 L1CAM, CD171; L1 cell adhesion molecule	Cell adhesion molecules (CAMs)
tr|E1BLM2|E1BLM2_BOVIN K06756 NRCAM; neuronal cell adhesion molecule	Cell adhesion molecules (CAMs)
tr|G3MYY6|G3MYY6_BOVIN K06757 NFASC; neurofascin	Cell adhesion molecules (CAMs)
CNTN2; contactin 2 [KO:K06760]
tr|F1MM03|F1MM03_BOVIN K06491 NCAM, CD56; neural cell adhesion molecule	Cell adhesion molecules (CAMs)
sp|P31836|NCAM1_BOVIN K06491 NCAM, CD56; neural cell adhesion molecule	Cell adhesion molecules (CAMs)
tr|E1BLM2|E1BLM2_BOVIN K06756 NRCAM; neuronal cell adhesion molecule	Cell adhesion molecules (CAMs)
tr|E1BBI3|E1BBI3_BOVIN K06550 L1CAM, CD171; L1 cell adhesion molecule	Cell adhesion molecules (CAMs)
tr|E1BPC9|E1BPC9_BOVIN K06760 CNTN2; contactin 2	Cell adhesion molecules (CAMs)
CNTN3; contactin 3 [KO:K06761]
tr|F1MFJ3|F1MFJ3_BOVIN K16667 PTPRG; receptor-type tyrosine-protein phosphatase gamma [EC:3.1.3.48]	Cell adhesion molecules (CAMs)
CNTN4; contactin 4 [KO:K06762]
tr|F1MFJ3|F1MFJ3_BOVIN K16667 PTPRG; receptor-type tyrosine-protein phosphatase gamma [EC:3.1.3.48]	Cell adhesion molecules (CAMs)
CNTN5; contactin 5 [KO:K06763]
tr|F1MFJ3|F1MFJ3_BOVIN K16667 PTPRG; receptor-type tyrosine-protein phosphatase gamma [EC:3.1.3.48]	Cell adhesion molecules (CAMs)
CNTN6; contactin 6 [KO:K06764]
tr|F1MFJ3|F1MFJ3_BOVIN K16667 PTPRG; receptor-type tyrosine-protein phosphatase gamma [EC:3.1.3.48]	Cell adhesion molecules (CAMs)
4/6 subfamily
DCC; deleted in colorectal carcinoma [KO:K06765]
tr|F1N0C7|F1N0C7_BOVIN K06843 NTN1; netrin 1	Other cell surface / pericellular molecules
NEO1; neogenin [KO:K06766]
tr|E1BI30|E1BI30_BOVIN K06847 RGM; RGM domain family	Other cell surface / pericellular molecules
tr|E1BFA9|E1BFA9_BOVIN K06847 RGM; RGM domain family	Other cell surface / pericellular molecules
tr|F1N0C7|F1N0C7_BOVIN K06843 NTN1; netrin 1	Other cell surface / pericellular molecules
10/6 subfamily
DSCAM; Down syndrome cell adhesion molecule [KO:K06767]
tr|F1MKB9|F1MKB9_BOVIN K06767 DSCAM; Down syndrome cell adhesion molecule	Cell adhesion molecules (CAMs)
tr|F1N0C7|F1N0C7_BOVIN K06843 NTN1; netrin 1	Other cell surface / pericellular molecules
DSCAML1; Down syndrome cell adhesion molecule-like protein 1 [KO:K06768]
tr|V6F7Z2|V6F7Z2_BOVIN K06768 DSCAML1; Down syndrome cell adhesion molecule-like protein 1	Cell adhesion molecules (CAMs)
6/13 subfamily
SDK; protein sidekick [KO:K16353]
tr|F1MPT4|F1MPT4_BOVIN K16353 SDK; protein sidekick	Cell adhesion molecules (CAMs)
tr|F1MFI5|F1MFI5_BOVIN K16353 SDK; protein sidekick	Cell adhesion molecules (CAMs)
1/1 subfamily
LRFN1, SALM2; leucine-rich repeat and fibronectin type-III domain-containing protein 1 [KO:K16354]
tr|F1MM66|F1MM66_BOVIN K11828 DLG4, PSD95; discs large protein 4	Other cell surface / pericellular molecules
LRFN2, SALM1; leucine-rich repeat and fibronectin type-III domain-containing protein 2 [KO:K16355]
tr|F1MM66|F1MM66_BOVIN K11828 DLG4, PSD95; discs large protein 4	Other cell surface / pericellular molecules
LRFN3, SALM4; leucine-rich repeat and fibronectin type-III domain-containing protein 3 [KO:K16356]
sp|Q1RMS4|LRFN3_BOVIN K16356 LRFN3, SALM4; leucine-rich repeat and fibronectin type-III domain-containing protein 3	Cell adhesion molecules (CAMs)
LRFN4, SALM3; leucine-rich repeat and fibronectin type-III domain-containing protein 4 [KO:K16357]
tr|F1MM66|F1MM66_BOVIN K11828 DLG4, PSD95; discs large protein 4	Other cell surface / pericellular molecules
N/0 subfamily
ICAM5, TLCN; intercellular adhesion molecule 5 [KO:K06769]
LFA-1	Cell adhesion molecules (CAMs)
sp|P61625|ITAL_BOVIN K05718 ITGAL, CD11a; integrin alpha L
sp|P32592|ITB2_BOVIN K06464 ITGB2, CD18; integrin beta 2
THY1, CD90; Thy-1 cell surface antigen [KO:K06514]
VNR	Cell adhesion molecules (CAMs)
sp|P80746|ITAV_BOVIN K06487 ITGAV, CD51; integrin alpha V
CR3, Mac-1	Cell adhesion molecules (CAMs)
tr|Q24LN2|Q24LN2_BOVIN K06461 ITGAM, CD11b; integrin alpha M
sp|P32592|ITB2_BOVIN K06464 ITGB2, CD18; integrin beta 2
MAG, GMA, SIGLEC4; myelin associated glycoprotein [KO:K06771]
tr|F1MFF8|F1MFF8_BOVIN K06771 MAG, GMA, SIGLEC4; myelin associated glycoprotein	Cell adhesion molecules (CAMs)
tr|Q5E9N1|Q5E9N1_BOVIN K06771 MAG, GMA, SIGLEC4; myelin associated glycoprotein	Cell adhesion molecules (CAMs)
LSAMP, LAMP; limbic system-associated membrane protein [KO:K06772]
tr|L8IYT4|L8IYT4_9CETA K06772 LSAMP, LAMP; limbic system-associated membrane protein	Cell adhesion molecules (CAMs)
sp|Q58DA5|NTRI_BOVIN K06774 HNT; neurotrimin	Cell adhesion molecules (CAMs)
OPCML, OBCAM; opioid binding protein/cell adhesion molecule-like [KO:K06773]
tr|L8IYT4|L8IYT4_9CETA K06772 LSAMP, LAMP; limbic system-associated membrane protein	Cell adhesion molecules (CAMs)
HNT; neurotrimin [KO:K06774]
sp|Q58DA5|NTRI_BOVIN K06774 HNT; neurotrimin	Cell adhesion molecules (CAMs)
tr|L8IYT4|L8IYT4_9CETA K06772 LSAMP, LAMP; limbic system-associated membrane protein	Cell adhesion molecules (CAMs)
LRRC4B, NGL3; netrin-G3 ligand [KO:K16360]
tr|F1MJR2|F1MJR2_BOVIN K06777 PTPRD; receptor-type tyrosine-protein phosphatase delta [EC:3.1.3.48]	Cell adhesion molecules (CAMs)
tr|E1BIU8|E1BIU8_BOVIN K06778 PTPRS; receptor-type tyrosine-protein phosphatase S [EC:3.1.3.48]	Cell adhesion molecules (CAMs)
Enzymatic CD
FGFR1; fibroblast growth factor receptor 1 [KO:K04362]
tr|F1MM03|F1MM03_BOVIN K06491 NCAM, CD56; neural cell adhesion molecule	Cell adhesion molecules (CAMs)
sp|P31836|NCAM1_BOVIN K06491 NCAM, CD56; neural cell adhesion molecule	Cell adhesion molecules (CAMs)
tr|E1BBI3|E1BBI3_BOVIN K06550 L1CAM, CD171; L1 cell adhesion molecule	Cell adhesion molecules (CAMs)
sp|P19534|CADH2_BOVIN K06736 CDH2, CDHN, CD325; cadherin 2, type 1, N-cadherin	Cell adhesion molecules (CAMs)
sp|P03969|FGF2_BOVIN K18497 FGF2; fibroblast growth factor 2	Soluble ligands
tr|F1MQA1|F1MQA1_BOVIN K04358 FGF; fibroblast growth factor	Soluble ligands
tr|A6H6W8|A6H6W8_BOVIN K04358 FGF; fibroblast growth factor	Soluble ligands
tr|F1N6G8|F1N6G8_BOVIN K04358 FGF; fibroblast growth factor	Soluble ligands
sp|A0MTF4|FGF5_BOVIN K04358 FGF; fibroblast growth factor	Soluble ligands
tr|E1BLM4|E1BLM4_BOVIN K04358 FGF; fibroblast growth factor	Soluble ligands
tr|E1B753|E1B753_BOVIN K04358 FGF; fibroblast growth factor	Soluble ligands
tr|E1BEB9|E1BEB9_BOVIN K04358 FGF; fibroblast growth factor	Soluble ligands
tr|E1BGY3|E1BGY3_BOVIN K04358 FGF; fibroblast growth factor	Soluble ligands
FGFR2; fibroblast growth factor receptor 2 [KO:K05093]
sp|P03969|FGF2_BOVIN K18497 FGF2; fibroblast growth factor 2	Soluble ligands
tr|F1MQA1|F1MQA1_BOVIN K04358 FGF; fibroblast growth factor	Soluble ligands
tr|A6H6W8|A6H6W8_BOVIN K04358 FGF; fibroblast growth factor	Soluble ligands
tr|F1N6G8|F1N6G8_BOVIN K04358 FGF; fibroblast growth factor	Soluble ligands
sp|A0MTF4|FGF5_BOVIN K04358 FGF; fibroblast growth factor	Soluble ligands
tr|E1BLM4|E1BLM4_BOVIN K04358 FGF; fibroblast growth factor	Soluble ligands
tr|E1B753|E1B753_BOVIN K04358 FGF; fibroblast growth factor	Soluble ligands
tr|E1BEB9|E1BEB9_BOVIN K04358 FGF; fibroblast growth factor	Soluble ligands
tr|E1BGY3|E1BGY3_BOVIN K04358 FGF; fibroblast growth factor	Soluble ligands
FGFR3; fibroblast growth factor receptor [KO:K05094]
sp|P03969|FGF2_BOVIN K18497 FGF2; fibroblast growth factor 2	Soluble ligands
tr|F1MQA1|F1MQA1_BOVIN K04358 FGF; fibroblast growth factor	Soluble ligands
tr|A6H6W8|A6H6W8_BOVIN K04358 FGF; fibroblast growth factor	Soluble ligands
tr|F1N6G8|F1N6G8_BOVIN K04358 FGF; fibroblast growth factor	Soluble ligands
sp|A0MTF4|FGF5_BOVIN K04358 FGF; fibroblast growth factor	Soluble ligands
tr|E1BLM4|E1BLM4_BOVIN K04358 FGF; fibroblast growth factor	Soluble ligands
tr|E1B753|E1B753_BOVIN K04358 FGF; fibroblast growth factor	Soluble ligands
tr|E1BEB9|E1BEB9_BOVIN K04358 FGF; fibroblast growth factor	Soluble ligands
tr|E1BGY3|E1BGY3_BOVIN K04358 FGF; fibroblast growth factor	Soluble ligands
FGFR4; fibroblast growth factor receptor 4 [KO:K05095]
tr|F1MM03|F1MM03_BOVIN K06491 NCAM, CD56; neural cell adhesion molecule	Cell adhesion molecules (CAMs)
sp|P31836|NCAM1_BOVIN K06491 NCAM, CD56; neural cell adhesion molecule	Cell adhesion molecules (CAMs)
sp|P19534|CADH2_BOVIN K06736 CDH2, CDHN, CD325; cadherin 2, type 1, N-cadherin	Cell adhesion molecules (CAMs)
sp|P03969|FGF2_BOVIN K18497 FGF2; fibroblast growth factor 2	Soluble ligands
tr|F1MQA1|F1MQA1_BOVIN K04358 FGF; fibroblast growth factor	Soluble ligands
tr|A6H6W8|A6H6W8_BOVIN K04358 FGF; fibroblast growth factor	Soluble ligands
tr|F1N6G8|F1N6G8_BOVIN K04358 FGF; fibroblast growth factor	Soluble ligands
sp|A0MTF4|FGF5_BOVIN K04358 FGF; fibroblast growth factor	Soluble ligands
tr|E1BLM4|E1BLM4_BOVIN K04358 FGF; fibroblast growth factor	Soluble ligands
tr|E1B753|E1B753_BOVIN K04358 FGF; fibroblast growth factor	Soluble ligands
tr|E1BEB9|E1BEB9_BOVIN K04358 FGF; fibroblast growth factor	Soluble ligands
tr|E1BGY3|E1BGY3_BOVIN K04358 FGF; fibroblast growth factor	Soluble ligands
PDGFRA; platelet-derived growth factor receptor, alpha polypeptide [KO:K04363]
sp|Q2KJ15|PDGFA_BOVIN K04359 PDGFA; platelet-derived growth factor subunit A	Soluble ligands
tr|B1H0W5|B1H0W5_BOVIN K17386 PDGFB; platelet-derived growth factor subunit B	Soluble ligands
tr|A4IFC0|A4IFC0_BOVIN K05450 PDGFC_D; platelet derived growth factor C/D	Soluble ligands
PDGFRB; platelet-derived growth factor receptor, beta polypeptide [KO:K05089]
sp|Q2KJ15|PDGFA_BOVIN K04359 PDGFA; platelet-derived growth factor subunit A	Soluble ligands
tr|B1H0W5|B1H0W5_BOVIN K17386 PDGFB; platelet-derived growth factor subunit B	Soluble ligands
tr|A4IFC0|A4IFC0_BOVIN K05450 PDGFC_D; platelet derived growth factor C/D	Soluble ligands
tr|E1BGJ0|E1BGJ0_BOVIN K04550 LRP1, CD91; low-density lipoprotein receptor-related protein 1 (alpha-2-macroglobulin receptor)	Other cell surface / pericellular molecules
EGFR, ERBB1; epidermal growth factor receptor [KO:K04361]
tr|E1BBI3|E1BBI3_BOVIN K06550 L1CAM, CD171; L1 cell adhesion molecule	Cell adhesion molecules (CAMs)
PTPRF, LAR; receptor-type tyrosine-protein phosphatase F [KO:K05695]
tr|E1BPK8|E1BPK8_BOVIN K16360 LRRC4B, NGL3; netrin-G3 ligand	Cell adhesion molecules (CAMs)
tr|F1N367|F1N367_BOVIN K06792 AGC1, CSPG1; aggrecan 1	Cell adhesion molecules (CAMs)
sp|P81282|CSPG2_BOVIN K06793 VCAN, CSPG2; versican core protein	Cell adhesion molecules (CAMs)
tr|F1N084|F1N084_BOVIN K08115 CSPG4; chondroitin sulfate proteoglycan 4	Cell adhesion molecules (CAMs)
sp|Q28062|PGCB_BOVIN K06795 BCAN; brevican	Cell adhesion molecules (CAMs)
Laminin-1	Extracellular matrix (ECM) components
tr|F1MNT4|F1MNT4_BOVIN K05636 LAMB1; laminin, beta 1
tr|F1MD77|F1MD77_BOVIN K05635 LAMC1; laminin, gamma 1
PTPRK; receptor-type tyrosine-protein phosphatase kappa [KO:K06776]
tr|F1MME1|F1MME1_BOVIN K06776 PTPRK; receptor-type tyrosine-protein phosphatase kappa [EC:3.1.3.48]	Cell adhesion molecules (CAMs)
PTPRD; receptor-type tyrosine-protein phosphatase delta [KO:K06777]
tr|F1MJR2|F1MJR2_BOVIN K06777 PTPRD; receptor-type tyrosine-protein phosphatase delta [EC:3.1.3.48]	Cell adhesion molecules (CAMs)
tr|E1BPK8|E1BPK8_BOVIN K16360 LRRC4B, NGL3; netrin-G3 ligand	Cell adhesion molecules (CAMs)
PTPRM; receptor-type tyrosine-protein phosphatase mu [KO:K05693]
tr|E1BPU9|E1BPU9_BOVIN K05693 PTPRM; receptor-type tyrosine-protein phosphatase mu [EC:3.1.3.48]	Cell adhesion molecules (CAMs)
PTPRS; receptor-type tyrosine-protein phosphatase S [KO:K06778]
tr|E1BIU8|E1BIU8_BOVIN K06778 PTPRS; receptor-type tyrosine-protein phosphatase S [EC:3.1.3.48]	Cell adhesion molecules (CAMs)
tr|E1BPK8|E1BPK8_BOVIN K16360 LRRC4B, NGL3; netrin-G3 ligand	Cell adhesion molecules (CAMs)
tr|F1MSI2|F1MSI2_BOVIN K06254 AGRN; agrin	Extracellular matrix (ECM) components
tr|A4FV05|A4FV05_BOVIN K06823 COL18A; collagen, type XVIII, alpha	Extracellular matrix (ECM) components
PTPRT; receptor-type tyrosine-protein phosphatase T [KO:K13297]
tr|E1BDH9|E1BDH9_BOVIN K13297 PTPRT; receptor-type tyrosine-protein phosphatase T [EC:3.1.3.48]	Cell adhesion molecules (CAMs)
PTPRU; receptor-type tyrosine-protein phosphatase U [KO:K16662]
tr|F1MD22|F1MD22_BOVIN K16662 PTPRU; receptor-type tyrosine-protein phosphatase U [EC:3.1.3.48]	Cell adhesion molecules (CAMs)
PTPRB, PTPB; receptor-type tyrosine-protein phosphatase beta [KO:K05694]
sp|Q6URK6|CADH5_BOVIN K06533 CDH5, CD144; cadherin 5, type 2, VE-cadherin	Cell adhesion molecules (CAMs)
Others
VCAM1; vascular cell adhesion molecule 1 [KO:K06527]
VLA-4	Cell adhesion molecules (CAMs)
sp|P53712-2|ITB1_BOVIN K05719 ITGB1, CD29; integrin beta 1
VLA-9	Cell adhesion molecules (CAMs)
tr|F1MMH2|F1MMH2_BOVIN K06585 ITGA9; integrin alpha 9
sp|P53712-2|ITB1_BOVIN K05719 ITGB1, CD29; integrin beta 1
CR3, Mac-1	Cell adhesion molecules (CAMs)
tr|Q24LN2|Q24LN2_BOVIN K06461 ITGAM, CD11b; integrin alpha M
sp|P32592|ITB2_BOVIN K06464 ITGB2, CD18; integrin beta 2
alpha D beta 2	Cell adhesion molecules (CAMs)
tr|F1N6B8|F1N6B8_BOVIN K06594 ITGAD, CD11d; integrin alpha D
sp|P32592|ITB2_BOVIN K06464 ITGB2, CD18; integrin beta 2
alpha 4 beta7	Cell adhesion molecules (CAMs)
tr|A7YWN9|A7YWN9_BOVIN K06590 ITGB7; integrin beta 7
PECAM1, CD31; platelet/endothelial cell adhesion molecule [KO:K06471]
tr|F6QPE0|F6QPE0_BOVIN K06471 PECAM1, CD31; platelet/endothelial cell adhesion molecule	Cell adhesion molecules (CAMs)
sp|P51866|PECA1_BOVIN K06471 PECAM1, CD31; platelet/endothelial cell adhesion molecule	Cell adhesion molecules (CAMs)
VNR	Cell adhesion molecules (CAMs)
sp|P80746|ITAV_BOVIN K06487 ITGAV, CD51; integrin alpha V
tr|Q9TTF5|Q9TTF5_BOVIN K01242 CD38; ADP-ribosyl cyclase 1 [EC:3.2.2.6 2.4.99.20]	Soluble ligands
MADCAM1; mucosal vascular addressin cell adhesion molecule 1 [KO:K06779]
alpha 4 beta7	Cell adhesion molecules (CAMs)
tr|A7YWN9|A7YWN9_BOVIN K06590 ITGB7; integrin beta 7
PVRL1; poliovirus receptor-related 1 [KO:K06081]
tr|F1MQJ3|F1MQJ3_BOVIN K06081 PVRL1, CD111; poliovirus receptor-related protein 1	Cell adhesion molecules (CAMs)
tr|F1MUF6|F1MUF6_BOVIN K06592 PVRL3, CD113; poliovirus receptor-related protein 3	Cell adhesion molecules (CAMs)
tr|A6QLR1|A6QLR1_BOVIN K06593 PVRL4; poliovirus receptor-related 4	Cell adhesion molecules (CAMs)
sp|Q3MHP9|TACT_BOVIN K06517 CD96; CD96 antigen	Cell adhesion molecules (CAMs)
PVRL2; poliovirus receptor-related 2 [KO:K06531]
tr|L8IA51|L8IA51_9CETA K06531 PVRL2, CD112; poliovirus receptor-related protein 2	Cell adhesion molecules (CAMs)
tr|F1MUF6|F1MUF6_BOVIN K06592 PVRL3, CD113; poliovirus receptor-related protein 3	Cell adhesion molecules (CAMs)
PVRL3; poliovirus receptor-related 3 [KO:K06592]
tr|F1MUF6|F1MUF6_BOVIN K06592 PVRL3, CD113; poliovirus receptor-related protein 3	Cell adhesion molecules (CAMs)
tr|F1MQJ3|F1MQJ3_BOVIN K06081 PVRL1, CD111; poliovirus receptor-related protein 1	Cell adhesion molecules (CAMs)
tr|L8IA51|L8IA51_9CETA K06531 PVRL2, CD112; poliovirus receptor-related protein 2	Cell adhesion molecules (CAMs)
PVRL4; poliovirus receptor-related 4 [KO:K06593]
tr|A6QLR1|A6QLR1_BOVIN K06593 PVRL4; poliovirus receptor-related 4	Cell adhesion molecules (CAMs)
tr|F1MQJ3|F1MQJ3_BOVIN K06081 PVRL1, CD111; poliovirus receptor-related protein 1	Cell adhesion molecules (CAMs)
CADM3, IGSF4B, NECL1, TSLL1; cell adhesion molecule 3 [KO:K06780]
tr|F1MQJ3|F1MQJ3_BOVIN K06081 PVRL1, CD111; poliovirus receptor-related protein 1	Cell adhesion molecules (CAMs)
tr|F1MUF6|F1MUF6_BOVIN K06592 PVRL3, CD113; poliovirus receptor-related protein 3	Cell adhesion molecules (CAMs)
CADM1, IGSF4, NECL2, TSLC1; cell adhesion molecule 1 [KO:K06781]
tr|F1MEW6|F1MEW6_BOVIN K06782 CADM2, IGSF4D, NECL3; cell adhesion molecule 2	Cell adhesion molecules (CAMs)
tr|F1MUF6|F1MUF6_BOVIN K06592 PVRL3, CD113; poliovirus receptor-related protein 3	Cell adhesion molecules (CAMs)
tr|A7YWT5|A7YWT5_BOVIN K16361 CRTAM, CD355; cytotoxic and regulatory T-cell molecule	Cell adhesion molecules (CAMs)
CADM2, IGSF4D, NECL3; cell adhesion molecule 2 [KO:K06782]
tr|F1MEW6|F1MEW6_BOVIN K06782 CADM2, IGSF4D, NECL3; cell adhesion molecule 2	Cell adhesion molecules (CAMs)
CADM4, IGSF4C, TSLL2; cell adhesion molecule 4 [KO:K06783]
tr|F1MEW6|F1MEW6_BOVIN K06782 CADM2, IGSF4D, NECL3; cell adhesion molecule 2	Cell adhesion molecules (CAMs)
PVR, NECL5; poliovirus receptor [KO:K06539]
tr|F1MUF6|F1MUF6_BOVIN K06592 PVRL3, CD113; poliovirus receptor-related protein 3	Cell adhesion molecules (CAMs)
sp|Q3MHP9|TACT_BOVIN K06517 CD96; CD96 antigen	Cell adhesion molecules (CAMs)
ICAM4; intercellular adhesion molecule 4 [KO:K06581]
VNR	Cell adhesion molecules (CAMs)
sp|P80746|ITAV_BOVIN K06487 ITGAV, CD51; integrin alpha V
LFA-1	Cell adhesion molecules (CAMs)
sp|P61625|ITAL_BOVIN K05718 ITGAL, CD11a; integrin alpha L
sp|P32592|ITB2_BOVIN K06464 ITGB2, CD18; integrin beta 2
CR3, Mac-1	Cell adhesion molecules (CAMs)
tr|Q24LN2|Q24LN2_BOVIN K06461 ITGAM, CD11b; integrin alpha M
sp|P32592|ITB2_BOVIN K06464 ITGB2, CD18; integrin beta 2
alpha IIb beta 3	Cell adhesion molecules (CAMs)
tr|A6QLB3|A6QLB3_BOVIN K06476 ITGA2B, CD41; integrin alpha 2B
alpha V beta 1	Cell adhesion molecules (CAMs)
sp|P80746|ITAV_BOVIN K06487 ITGAV, CD51; integrin alpha V
sp|P53712-2|ITB1_BOVIN K05719 ITGB1, CD29; integrin beta 1
alpha V beta 5	Cell adhesion molecules (CAMs)
sp|P80746|ITAV_BOVIN K06487 ITGAV, CD51; integrin alpha V
sp|P80747|ITB5_BOVIN K06588 ITGB5; integrin beta 5
p150/95	Cell adhesion molecules (CAMs)
sp|P32592|ITB2_BOVIN K06464 ITGB2, CD18; integrin beta 2
CEACAM; carcinoembryonic antigen-related cell adhesion molecule [KO:K06499]
tr|E1BKM1|E1BKM1_BOVIN K06499 CEACAM, CD66; carcinoembryonic antigen-related cell adhesion molecule	Cell adhesion molecules (CAMs)
tr|F1MU33|F1MU33_BOVIN K06499 CEACAM, CD66; carcinoembryonic antigen-related cell adhesion molecule	Cell adhesion molecules (CAMs)
tr|F1N2U9|F1N2U9_BOVIN K06499 CEACAM, CD66; carcinoembryonic antigen-related cell adhesion molecule	Cell adhesion molecules (CAMs)
ROBO4; roundabout, axon guidance receptor, homolog 4 (Drosophila) [KO:K06784]
tr|F1N739|F1N739_BOVIN K06753 ROBO1; roundabout, axon guidance receptor 1	Cell adhesion molecules (CAMs)
tr|F1MQ73|F1MQ73_BOVIN K07521 UNC5; netrin receptor unc-5	Cell adhesion molecules (CAMs)
tr|A5PJP9|A5PJP9_BOVIN K07521 UNC5; netrin receptor unc-5	Cell adhesion molecules (CAMs)
tr|F1MHX0|F1MHX0_BOVIN K07521 UNC5; netrin receptor unc-5	Cell adhesion molecules (CAMs)
tr|F1MLJ7|F1MLJ7_BOVIN K06839 SLIT2; slit 2	Other cell surface / pericellular molecules
LU; Lutheran blood group glycoprotein [KO:K06578]
VLA-4	Cell adhesion molecules (CAMs)
sp|P53712-2|ITB1_BOVIN K05719 ITGB1, CD29; integrin beta 1
Laminin-10	Extracellular matrix (ECM) components
tr|F1MNT4|F1MNT4_BOVIN K05636 LAMB1; laminin, beta 1
tr|F1MD77|F1MD77_BOVIN K05635 LAMC1; laminin, gamma 1
Laminin-11	Extracellular matrix (ECM) components
tr|E1BDK6|E1BDK6_BOVIN K06243 LAMB2; laminin, beta 2
tr|Q2KJA7|Q2KJA7_BOVIN K06243 LAMB2; laminin, beta 2
tr|F1MD77|F1MD77_BOVIN K05635 LAMC1; laminin, gamma 1
Laminin-14	Extracellular matrix (ECM) components
tr|F1MYX9|F1MYX9_BOVIN K06241 LAMA4; laminin, alpha 4
tr|E1BDK6|E1BDK6_BOVIN K06243 LAMB2; laminin, beta 2
tr|Q2KJA7|Q2KJA7_BOVIN K06243 LAMB2; laminin, beta 2
tr|F1N0T1|F1N0T1_BOVIN K06247 LAMC3; laminin, gamma 3
MCAM, CD146; melanoma cell adhesion molecule [KO:K06534]
Laminin-8	Extracellular matrix (ECM) components
tr|F1MYX9|F1MYX9_BOVIN K06241 LAMA4; laminin, alpha 4
tr|F1MNT4|F1MNT4_BOVIN K05636 LAMB1; laminin, beta 1
tr|F1MD77|F1MD77_BOVIN K05635 LAMC1; laminin, gamma 1
F11R, JAM1; junctional adhesion molecule 1 [KO:K06089]
LFA-1	Cell adhesion molecules (CAMs)
sp|P61625|ITAL_BOVIN K05718 ITGAL, CD11a; integrin alpha L
sp|P32592|ITB2_BOVIN K06464 ITGB2, CD18; integrin beta 2
JAM2; junctional adhesion molecule 2 [KO:K06735]
VLA-4	Cell adhesion molecules (CAMs)
sp|P53712-2|ITB1_BOVIN K05719 ITGB1, CD29; integrin beta 1
JAM3; junctional adhesional molecule 3 [KO:K06785]
CR3, Mac-1	Cell adhesion molecules (CAMs)
tr|Q24LN2|Q24LN2_BOVIN K06461 ITGAM, CD11b; integrin alpha M
sp|P32592|ITB2_BOVIN K06464 ITGB2, CD18; integrin beta 2
CXADR, CAR; coxsackievirus and adenovirus receptor [KO:K06788]
Laminin-1	Extracellular matrix (ECM) components
tr|F1MNT4|F1MNT4_BOVIN K05636 LAMB1; laminin, beta 1
tr|F1MD77|F1MD77_BOVIN K05635 LAMC1; laminin, gamma 1
sp|P07589|FINC_BOVIN K05717 FN1; fibronectin 1	Extracellular matrix (ECM) components
tr|F1MPK6|F1MPK6_BOVIN K06252 TN; tenascin	Extracellular matrix (ECM) components
tr|E1BB79|E1BB79_BOVIN K06252 TN; tenascin	Extracellular matrix (ECM) components
tr|A0JN60|A0JN60_BOVIN K06252 TN; tenascin	Extracellular matrix (ECM) components
tr|F1MSI2|F1MSI2_BOVIN K06254 AGRN; agrin	Extracellular matrix (ECM) components
IGSF11; immunoglobulin superfamily, member 11 [KO:K06791]
sp|Q08DK1|IGS11_BOVIN K06791 IGSF11; immunoglobulin superfamily, member 11	Cell adhesion molecules (CAMs)
CRTAM; cytotoxic and regulatory T-cell molecule [KO:K16361]
tr|A7YWT5|A7YWT5_BOVIN K16361 CRTAM, CD355; cytotoxic and regulatory T-cell molecule	Cell adhesion molecules (CAMs)
UNC5; netrin receptor unc-5 [KO:K07521]
tr|A6H7I1|A6H7I1_BOVIN K06784 ROBO4; roundabout, axon guidance receptor 4	Cell adhesion molecules (CAMs)
tr|G3MY74|G3MY74_BOVIN K16362 FLRT; leucine-rich repeat transmembrane protein FLRT	Cell adhesion molecules (CAMs)
tr|F1N0R7|F1N0R7_BOVIN K16362 FLRT; leucine-rich repeat transmembrane protein FLRT	Cell adhesion molecules (CAMs)
tr|F1MVT1|F1MVT1_BOVIN K16362 FLRT; leucine-rich repeat transmembrane protein FLRT	Cell adhesion molecules (CAMs)
tr|F1N0C7|F1N0C7_BOVIN K06843 NTN1; netrin 1	Other cell surface / pericellular molecules
2. Integrin Family
Beta1 integrins
VLA-1
ITGB1; integrin beta 1 [KO:K05719]
sp|P02453|CO1A1_BOVIN K06236 COL1A; collagen, type I, alpha	Extracellular matrix (ECM) components
sp|P02465|CO1A2_BOVIN K06236 COL1A; collagen, type I, alpha	Extracellular matrix (ECM) components
tr|F1N474|F1N474_BOVIN K06237 COL4A; collagen, type IV, alpha	Extracellular matrix (ECM) components
tr|F1MJ71|F1MJ71_BOVIN K06237 COL4A; collagen, type IV, alpha	Extracellular matrix (ECM) components
tr|F1MZU6|F1MZU6_BOVIN K06237 COL4A; collagen, type IV, alpha	Extracellular matrix (ECM) components
tr|F1N7Q7|F1N7Q7_BOVIN K06237 COL4A; collagen, type IV, alpha	Extracellular matrix (ECM) components
sp|Q7SIB2|CO4A1_BOVIN K06237 COL4A; collagen, type IV, alpha	Extracellular matrix (ECM) components
tr|F1MND9|F1MND9_BOVIN K08131 COL9A; collagen, type IX, alpha	Extracellular matrix (ECM) components
tr|F6R9Y9|F6R9Y9_BOVIN K08131 COL9A; collagen, type IX, alpha	Extracellular matrix (ECM) components
Laminin-1	Extracellular matrix (ECM) components
tr|F1MNT4|F1MNT4_BOVIN K05636 LAMB1; laminin, beta 1
tr|F1MD77|F1MD77_BOVIN K05635 LAMC1; laminin, gamma 1
Laminin-2	Extracellular matrix (ECM) components
tr|F1MNT4|F1MNT4_BOVIN K05636 LAMB1; laminin, beta 1
tr|F1MD77|F1MD77_BOVIN K05635 LAMC1; laminin, gamma 1
VLA-2
ITGB1; integrin beta 1 [KO:K05719]
VLA-3	Cell adhesion molecules (CAMs)
sp|F1MMS9|ITA3_BOVIN K06482 ITGA3, CD49c; integrin alpha 3
sp|P53712-2|ITB1_BOVIN K05719 ITGB1, CD29; integrin beta 1
sp|Q6R8F2|CADH1_BOVIN K05689 CDH1, CDHE, CD324; cadherin 1, type 1, E-cadherin	Cell adhesion molecules (CAMs)
sp|P02453|CO1A1_BOVIN K06236 COL1A; collagen, type I, alpha	Extracellular matrix (ECM) components
sp|P02465|CO1A2_BOVIN K06236 COL1A; collagen, type I, alpha	Extracellular matrix (ECM) components
tr|F1N474|F1N474_BOVIN K06237 COL4A; collagen, type IV, alpha	Extracellular matrix (ECM) components
tr|F1MJ71|F1MJ71_BOVIN K06237 COL4A; collagen, type IV, alpha	Extracellular matrix (ECM) components
tr|F1MZU6|F1MZU6_BOVIN K06237 COL4A; collagen, type IV, alpha	Extracellular matrix (ECM) components
tr|F1N7Q7|F1N7Q7_BOVIN K06237 COL4A; collagen, type IV, alpha	Extracellular matrix (ECM) components
sp|Q7SIB2|CO4A1_BOVIN K06237 COL4A; collagen, type IV, alpha	Extracellular matrix (ECM) components
tr|F1MND9|F1MND9_BOVIN K08131 COL9A; collagen, type IX, alpha
tr|F6R9Y9|F6R9Y9_BOVIN K08131 COL9A; collagen, type IX, alpha
Laminin-1	Extracellular matrix (ECM) components
tr|F1MNT4|F1MNT4_BOVIN K05636 LAMB1; laminin, beta 1
tr|F1MD77|F1MD77_BOVIN K05635 LAMC1; laminin, gamma 1
Laminin-2	Extracellular matrix (ECM) components
tr|F1MNT4|F1MNT4_BOVIN K05636 LAMB1; laminin, beta 1
tr|F1MD77|F1MD77_BOVIN K05635 LAMC1; laminin, gamma 1
tr|F1MPK6|F1MPK6_BOVIN K06252 TN; tenascin	Extracellular matrix (ECM) components
tr|E1BB79|E1BB79_BOVIN K06252 TN; tenascin	Extracellular matrix (ECM) components
tr|A0JN60|A0JN60_BOVIN K06252 TN; tenascin	Extracellular matrix (ECM) components
tr|F1MER7|F1MER7_BOVIN K06255 HSPG2; heparan sulfate proteoglycan 2 (perlecan)	Extracellular matrix (ECM) components
sp|Q27972|CHAD_BOVIN K06248 CHAD; chondroadherin	Extracellular matrix (ECM) components
VLA-3
ITGB1; integrin beta 1 [KO:K05719]
VLA-2	Cell adhesion molecules (CAMs)
sp|P53712-2|ITB1_BOVIN K05719 ITGB1, CD29; integrin beta 1
VLA-3	Cell adhesion molecules (CAMs)
sp|F1MMS9|ITA3_BOVIN K06482 ITGA3, CD49c; integrin alpha 3
sp|P53712-2|ITB1_BOVIN K05719 ITGB1, CD29; integrin beta 1
tr|F1N474|F1N474_BOVIN K06237 COL4A; collagen, type IV, alpha	Extracellular matrix (ECM) components
tr|F1MJ71|F1MJ71_BOVIN K06237 COL4A; collagen, type IV, alpha	Extracellular matrix (ECM) components
tr|F1MZU6|F1MZU6_BOVIN K06237 COL4A; collagen, type IV, alpha	Extracellular matrix (ECM) components
tr|F1N7Q7|F1N7Q7_BOVIN K06237 COL4A; collagen, type IV, alpha	Extracellular matrix (ECM) components
sp|Q7SIB2|CO4A1_BOVIN K06237 COL4A; collagen, type IV, alpha	Extracellular matrix (ECM) components
Laminin-2	Extracellular matrix (ECM) components
tr|F1MNT4|F1MNT4_BOVIN K05636 LAMB1; laminin, beta 1
tr|F1MD77|F1MD77_BOVIN K05635 LAMC1; laminin, gamma 1
Laminin-5	Extracellular matrix (ECM) components
tr|E1B7Q3|E1B7Q3_BOVIN K06246 LAMC2; laminin, gamma 2
Laminin-10	Extracellular matrix (ECM) components
tr|F1MNT4|F1MNT4_BOVIN K05636 LAMB1; laminin, beta 1
tr|F1MD77|F1MD77_BOVIN K05635 LAMC1; laminin, gamma 1
Laminin-11	Extracellular matrix (ECM) components
tr|E1BDK6|E1BDK6_BOVIN K06243 LAMB2; laminin, beta 2
tr|Q2KJA7|Q2KJA7_BOVIN K06243 LAMB2; laminin, beta 2
tr|F1MD77|F1MD77_BOVIN K05635 LAMC1; laminin, gamma 1
sp|Q28178|TSP1_BOVIN K16857 THBS1; thrombospondin 1	Extracellular matrix (ECM) components
sp|Q95116|TSP2_BOVIN K04659 THBS2S; thrombospondin 2/3/4/5	Extracellular matrix (ECM) components
sp|P35445|COMP_BOVIN K04659 THBS2S; thrombospondin 2/3/4/5	Extracellular matrix (ECM) components
sp|Q3SWW8|TSP4_BOVIN K04659 THBS2S; thrombospondin 2/3/4/5	Extracellular matrix (ECM) components
tr|A6QQT1|A6QQT1_BOVIN K04659 THBS2S; thrombospondin 2/3/4/5	Extracellular matrix (ECM) components
tr|F1MTZ9|F1MTZ9_BOVIN K04659 THBS2S; thrombospondin 2/3/4/5	Extracellular matrix (ECM) components
tr|G3MZZ1|G3MZZ1_BOVIN K06249 RELN; reelin [EC:3.4.21.-]	Extracellular matrix (ECM) components
tr|Q6Q144|Q6Q144_BOVIN K06249 RELN; reelin [EC:3.4.21.-]	Extracellular matrix (ECM) components
tr|A7E306|A7E306_BOVIN K06826 NID; nidogen (entactin)	Extracellular matrix (ECM) components
tr|F1MWN3|F1MWN3_BOVIN K06826 NID; nidogen (entactin)	Extracellular matrix (ECM) components
tr|Q2YDD7|Q2YDD7_BOVIN K06832 LGALS8; galectin-8	Other cell surface / pericellular molecules
VLA-4
ITGB1; integrin beta 1 [KO:K05719]
tr|E1BLM2|E1BLM2_BOVIN K06756 NRCAM; neuronal cell adhesion molecule	Cell adhesion molecules (CAMs)
tr|Q9GKR3|Q9GKR3_BOVIN K06527 VCAM1, CD106; vascular cell adhesion molecule 1	Cell adhesion molecules (CAMs)
sp|Q9MZ08|BCAM_BOVIN K06578 LU, CD239; Lutheran blood group glycoprotein	Cell adhesion molecules (CAMs)
sp|P07589|FINC_BOVIN K05717 FN1; fibronectin 1	Extracellular matrix (ECM) components
tr|F1N0R5|F1N0R5_BOVIN K03900 VWF; von Willebrand factor	Extracellular matrix (ECM) components
sp|P51176|TGM2_BOVIN K05625 TGM2; transglutaminase 2 [EC:2.3.2.13]	Soluble ligands
tr|F1MW44|F1MW44_BOVIN K03917 F13A1; coagulation factor XIII A1 polypeptide [EC:2.3.2.13]	Soluble ligands
tr|L8IJP1|L8IJP1_9CETA K03906 F13B; coagulation factor XIII B polypeptide	Soluble ligands
tr|A7E350|A7E350_BOVIN K01315 PLG; plasminogen [EC:3.4.21.7]	Soluble ligands
VLA-5
ITGB1; integrin beta 1 [KO:K05719]
tr|E1BBI3|E1BBI3_BOVIN K06550 L1CAM, CD171; L1 cell adhesion molecule	Cell adhesion molecules (CAMs)
tr|G3MWT6|G3MWT6_BOVIN K16493 PCDHA; protocadherin alpha	Cell adhesion molecules (CAMs)
tr|F1MTQ6|F1MTQ6_BOVIN K16493 PCDHA; protocadherin alpha	Cell adhesion molecules (CAMs)
tr|A4FV05|A4FV05_BOVIN K06823 COL18A; collagen, type XVIII, alpha	Extracellular matrix (ECM) components
sp|P07589|FINC_BOVIN K05717 FN1; fibronectin 1	Extracellular matrix (ECM) components
sp|P51176|TGM2_BOVIN K05625 TGM2; transglutaminase 2 [EC:2.3.2.13]	Soluble ligands
tr|E1BBU4|E1BBU4_BOVIN K06836 ADAM15; disintegrin and metalloproteinase domain-containing protein 15 [EC:3.4.24.-]	Other cell surface / pericellular molecules
VLA-6
ITGB1; integrin beta 1 [KO:K05719]
Laminin-1	Extracellular matrix (ECM) components
tr|F1MNT4|F1MNT4_BOVIN K05636 LAMB1; laminin, beta 1
tr|F1MD77|F1MD77_BOVIN K05635 LAMC1; laminin, gamma 1
Laminin-2	Extracellular matrix (ECM) components
tr|F1MNT4|F1MNT4_BOVIN K05636 LAMB1; laminin, beta 1
tr|F1MD77|F1MD77_BOVIN K05635 LAMC1; laminin, gamma 1
Laminin-5	Extracellular matrix (ECM) components
tr|E1B7Q3|E1B7Q3_BOVIN K06246 LAMC2; laminin, gamma 2
Laminin-8	Extracellular matrix (ECM) components
tr|F1MYX9|F1MYX9_BOVIN K06241 LAMA4; laminin, alpha 4
tr|F1MNT4|F1MNT4_BOVIN K05636 LAMB1; laminin, beta 1
tr|F1MD77|F1MD77_BOVIN K05635 LAMC1; laminin, gamma 1
Laminin-10	Extracellular matrix (ECM) components
tr|F1MNT4|F1MNT4_BOVIN K05636 LAMB1; laminin, beta 1
tr|F1MD77|F1MD77_BOVIN K05635 LAMC1; laminin, gamma 1
Laminin-11	Extracellular matrix (ECM) components
tr|E1BDK6|E1BDK6_BOVIN K06243 LAMB2; laminin, beta 2
tr|Q2KJA7|Q2KJA7_BOVIN K06243 LAMB2; laminin, beta 2
tr|F1MD77|F1MD77_BOVIN K05635 LAMC1; laminin, gamma 1
sp|O18739|CTGF_BOVIN K06827 CTGF; connective tissue growth factor	Soluble ligands
tr|L8IYJ5|L8IYJ5_9CETA K06829 CYR61; cysteine rich protein 61	Soluble ligands
sp|O77780|ADAM2_BOVIN K06833 ADAM2; disintegrin and metalloproteinase domain-containing protein 2 [EC:3.4.24.-]	Other cell surface / pericellular molecules
VLA-7
ITGB1; integrin beta 1 [KO:K05719]
Laminin-1	Extracellular matrix (ECM) components
tr|F1MNT4|F1MNT4_BOVIN K05636 LAMB1; laminin, beta 1
tr|F1MD77|F1MD77_BOVIN K05635 LAMC1; laminin, gamma 1
Laminin-2	Extracellular matrix (ECM) components
tr|F1MNT4|F1MNT4_BOVIN K05636 LAMB1; laminin, beta 1
tr|F1MD77|F1MD77_BOVIN K05635 LAMC1; laminin, gamma 1
VLA-8
ITGB1; integrin beta 1 [KO:K05719]
sp|P07589|FINC_BOVIN K05717 FN1; fibronectin 1	Extracellular matrix (ECM) components
tr|F1MPK6|F1MPK6_BOVIN K06252 TN; tenascin	Extracellular matrix (ECM) components
tr|E1BB79|E1BB79_BOVIN K06252 TN; tenascin	Extracellular matrix (ECM) components
tr|A0JN60|A0JN60_BOVIN K06252 TN; tenascin	Extracellular matrix (ECM) components
tr|L8HY22|L8HY22_9CETA K06251 VTN; vitronectin	Extracellular matrix (ECM) components
tr|E1BBK6|E1BBK6_BOVIN K06824 NPNT; nephronectin	Extracellular matrix (ECM) components
sp|P21214|TGFB2_BOVIN K13376 TGFB2; transforming growth factor beta-2	Soluble ligands
VLA-9
ITGB1; integrin beta 1 [KO:K05719]
tr|Q9GKR3|Q9GKR3_BOVIN K06527 VCAM1, CD106; vascular cell adhesion molecule 1	Cell adhesion molecules (CAMs)
tr|F1MPK6|F1MPK6_BOVIN K06252 TN; tenascin	Extracellular matrix (ECM) components
tr|E1BB79|E1BB79_BOVIN K06252 TN; tenascin	Extracellular matrix (ECM) components
tr|A0JN60|A0JN60_BOVIN K06252 TN; tenascin	Extracellular matrix (ECM) components
tr|F1N0R5|F1N0R5_BOVIN K03900 VWF; von Willebrand factor	Extracellular matrix (ECM) components
sp|P51176|TGM2_BOVIN K05625 TGM2; transglutaminase 2 [EC:2.3.2.13]	Soluble ligands
tr|F1MW44|F1MW44_BOVIN K03917 F13A1; coagulation factor XIII A1 polypeptide [EC:2.3.2.13]	Soluble ligands
tr|L8IJP1|L8IJP1_9CETA K03906 F13B; coagulation factor XIII B polypeptide	Soluble ligands
tr|A7E350|A7E350_BOVIN K01315 PLG; plasminogen [EC:3.4.21.7]	Soluble ligands
tr|E1BBU4|E1BBU4_BOVIN K06836 ADAM15; disintegrin and metalloproteinase domain-containing protein 15 [EC:3.4.24.-]	Other cell surface / pericellular molecules
alpha 10 beta 1
ITGB1; integrin beta 1 [KO:K05719]
tr|F1N474|F1N474_BOVIN K06237 COL4A; collagen, type IV, alpha	Extracellular matrix (ECM) components
tr|F1MJ71|F1MJ71_BOVIN K06237 COL4A; collagen, type IV, alpha	Extracellular matrix (ECM) components
tr|F1MZU6|F1MZU6_BOVIN K06237 COL4A; collagen, type IV, alpha	Extracellular matrix (ECM) components
tr|F1N7Q7|F1N7Q7_BOVIN K06237 COL4A; collagen, type IV, alpha	Extracellular matrix (ECM) components
sp|Q7SIB2|CO4A1_BOVIN K06237 COL4A; collagen, type IV, alpha	Extracellular matrix (ECM) components
tr|F1MD40|F1MD40_BOVIN K06238 COL6A; collagen, type VI, alpha	Extracellular matrix (ECM) components
tr|E1BB91|E1BB91_BOVIN K06238 COL6A; collagen, type VI, alpha	Extracellular matrix (ECM) components
tr|E1BI98|E1BI98_BOVIN K06238 COL6A; collagen, type VI, alpha	Extracellular matrix (ECM) components
alpha 11 beta 1
ITGB1; integrin beta 1 [KO:K05719]
sp|P02453|CO1A1_BOVIN K06236 COL1A; collagen, type I, alpha	Extracellular matrix (ECM) components
sp|P02465|CO1A2_BOVIN K06236 COL1A; collagen, type I, alpha	Extracellular matrix (ECM) components
tr|F1N474|F1N474_BOVIN K06237 COL4A; collagen, type IV, alpha
tr|F1MJ71|F1MJ71_BOVIN K06237 COL4A; collagen, type IV, alpha
tr|F1MZU6|F1MZU6_BOVIN K06237 COL4A; collagen, type IV, alpha
tr|F1N7Q7|F1N7Q7_BOVIN K06237 COL4A; collagen, type IV, alpha
sp|Q7SIB2|CO4A1_BOVIN K06237 COL4A; collagen, type IV, alpha
tr|F1MND9|F1MND9_BOVIN K08131 COL9A; collagen, type IX, alpha
tr|F6R9Y9|F6R9Y9_BOVIN K08131 COL9A; collagen, type IX, alpha
alpha V beta 1
ITGB1; integrin beta 1 [KO:K05719]
sp|P07589|FINC_BOVIN K05717 FN1; fibronectin 1	Extracellular matrix (ECM) components
tr|L8HY22|L8HY22_9CETA K06251 VTN; vitronectin	Extracellular matrix (ECM) components
sp|P21214|TGFB2_BOVIN K13376 TGFB2; transforming growth factor beta-2	Soluble ligands
Beta2 integrins
LFA-1
ITGB2; integrin beta 2 [KO:K06464]
tr|E1BLR0|E1BLR0_BOVIN K06769 ICAM5, TLCN; intercellular adhesion molecule 5	Cell adhesion molecules (CAMs)
CR3, Mac-1
ITGB2; integrin beta 2 [KO:K06464]
tr|Q9GKR3|Q9GKR3_BOVIN K06527 VCAM1, CD106; vascular cell adhesion molecule 1	Cell adhesion molecules (CAMs)
sp|P55906|BGH3_BOVIN K19519 TGFBI, BIGH3; transforming growth factor-beta-induced protein	Extracellular matrix (ECM) components
tr|F1MAV0|F1MAV0_BOVIN K03904 FGB; fibrinogen beta chain	Soluble ligands
tr|F1MGU7|F1MGU7_BOVIN K03905 FGG; fibrinogen gamma chain	Soluble ligands
sp|Q2UVX4|CO3_BOVIN K03990 C3; complement component 3	Soluble ligands
sp|P00743|FA10_BOVIN K01314 F10; coagulation factor X [EC:3.4.21.6]	Soluble ligands
tr|E1BGJ0|E1BGJ0_BOVIN K04550 LRP1, CD91; low-density lipoprotein receptor-related protein 1 (alpha-2-macroglobulin receptor)	Other cell surface / pericellular molecules
p150/95
ITGB2; integrin beta 2 [KO:K06464]
tr|F1MAV0|F1MAV0_BOVIN K03904 FGB; fibrinogen beta chain	Soluble ligands
tr|F1MGU7|F1MGU7_BOVIN K03905 FGG; fibrinogen gamma chain	Soluble ligands
sp|Q2UVX4|CO3_BOVIN K03990 C3; complement component 3	Soluble ligands
tr|A7E350|A7E350_BOVIN K01315 PLG; plasminogen [EC:3.4.21.7]	Soluble ligands
alpha D beta 2
ITGB2; integrin beta 2 [KO:K06464]
tr|Q9GKR3|Q9GKR3_BOVIN K06527 VCAM1, CD106; vascular cell adhesion molecule 1	Cell adhesion molecules (CAMs)
Beta3 integrins
alpha IIb beta 3
ITGB3; integrin beta 3 [KO:K06493]
sp|Q3SWX5|CADH6_BOVIN K06798 CDH6; cadherin 6, type 2, K-cadherin	Cell adhesion molecules (CAMs)
tr|L8HY22|L8HY22_9CETA K06251 VTN; vitronectin	Extracellular matrix (ECM) components
sp|P07589|FINC_BOVIN K05717 FN1; fibronectin 1	Extracellular matrix (ECM) components
tr|F1N0R5|F1N0R5_BOVIN K03900 VWF; von Willebrand factor	Extracellular matrix (ECM) components
sp|Q95116|TSP2_BOVIN K04659 THBS2S; thrombospondin 2/3/4/5	Extracellular matrix (ECM) components
sp|P35445|COMP_BOVIN K04659 THBS2S; thrombospondin 2/3/4/5	Extracellular matrix (ECM) components
sp|Q3SWW8|TSP4_BOVIN K04659 THBS2S; thrombospondin 2/3/4/5	Extracellular matrix (ECM) components
tr|A6QQT1|A6QQT1_BOVIN K04659 THBS2S; thrombospondin 2/3/4/5	Extracellular matrix (ECM) components
tr|F1MTZ9|F1MTZ9_BOVIN K04659 THBS2S; thrombospondin 2/3/4/5	Extracellular matrix (ECM) components
tr|F1MAV0|F1MAV0_BOVIN K03904 FGB; fibrinogen beta chain	Soluble ligands
tr|F1MGU7|F1MGU7_BOVIN K03905 FGG; fibrinogen gamma chain	Soluble ligands
tr|L8IYJ5|L8IYJ5_9CETA K06829 CYR61; cysteine rich protein 61	Soluble ligands
sp|O18739|CTGF_BOVIN K06827 CTGF; connective tissue growth factor	Soluble ligands
sp|P00735|THRB_BOVIN K01313 F2; coagulation factor II (thrombin) [EC:3.4.21.5]	Soluble ligands
VNR
ITGB3; integrin beta 3 [KO:K06493]
tr|E1BBI3|E1BBI3_BOVIN K06550 L1CAM, CD171; L1 cell adhesion molecule	Cell adhesion molecules (CAMs)
tr|F6QPE0|F6QPE0_BOVIN K06471 PECAM1, CD31; platelet/endothelial cell adhesion molecule	Cell adhesion molecules (CAMs)
sp|P51866|PECA1_BOVIN K06471 PECAM1, CD31; platelet/endothelial cell adhesion molecule	Cell adhesion molecules (CAMs)
tr|L8HY22|L8HY22_9CETA K06251 VTN; vitronectin	Extracellular matrix (ECM) components
sp|P07589|FINC_BOVIN K05717 FN1; fibronectin 1	Extracellular matrix (ECM) components
tr|F1N0R5|F1N0R5_BOVIN K03900 VWF; von Willebrand factor	Extracellular matrix (ECM) components
sp|P98133|FBN1_BOVIN K06825 FBN1; fibrillin 1	Extracellular matrix (ECM) components
tr|F1MPK6|F1MPK6_BOVIN K06252 TN; tenascin	Extracellular matrix (ECM) components
tr|E1BB79|E1BB79_BOVIN K06252 TN; tenascin	Extracellular matrix (ECM) components
tr|A0JN60|A0JN60_BOVIN K06252 TN; tenascin	Extracellular matrix (ECM) components
sp|Q95116|TSP2_BOVIN K04659 THBS2S; thrombospondin 2/3/4/5	Extracellular matrix (ECM) components
sp|P35445|COMP_BOVIN K04659 THBS2S; thrombospondin 2/3/4/5	Extracellular matrix (ECM) components
sp|Q3SWW8|TSP4_BOVIN K04659 THBS2S; thrombospondin 2/3/4/5	Extracellular matrix (ECM) components
tr|A6QQT1|A6QQT1_BOVIN K04659 THBS2S; thrombospondin 2/3/4/5	Extracellular matrix (ECM) components
tr|F1MTZ9|F1MTZ9_BOVIN K04659 THBS2S; thrombospondin 2/3/4/5	Extracellular matrix (ECM) components
tr|F1MAV0|F1MAV0_BOVIN K03904 FGB; fibrinogen beta chain	Soluble ligands
tr|F1MGU7|F1MGU7_BOVIN K03905 FGG; fibrinogen gamma chain	Soluble ligands
tr|L8IYJ5|L8IYJ5_9CETA K06829 CYR61; cysteine rich protein 61	Soluble ligands
sp|O18739|CTGF_BOVIN K06827 CTGF; connective tissue growth factor	Soluble ligands
tr|F1MTX6|F1MTX6_BOVIN K01398 MMP2; matrix metalloproteinase-2 (gelatinase A) [EC:3.4.24.24]	Soluble ligands
tr|A7E350|A7E350_BOVIN K01315 PLG; plasminogen [EC:3.4.21.7]	Soluble ligands
tr|E1BBU4|E1BBU4_BOVIN K06836 ADAM15; disintegrin and metalloproteinase domain-containing protein 15 [EC:3.4.24.-]	Other cell surface / pericellular molecules
tr|A4FUX7|A4FUX7_BOVIN K06837 ADAM23; disintegrin and metalloproteinase domain-containing protein 23 [EC:3.4.24.-]	Other cell surface / pericellular molecules
Beta4 integrins
alpha 6 beta 4
ITGB4; integrin beta 4 [KO:K06525]
Laminin-1	Extracellular matrix (ECM) components
tr|F1MNT4|F1MNT4_BOVIN K05636 LAMB1; laminin, beta 1
tr|F1MD77|F1MD77_BOVIN K05635 LAMC1; laminin, gamma 1
Laminin-2	Extracellular matrix (ECM) components
tr|F1MNT4|F1MNT4_BOVIN K05636 LAMB1; laminin, beta 1
tr|F1MD77|F1MD77_BOVIN K05635 LAMC1; laminin, gamma 1
Laminin-5	Extracellular matrix (ECM) components
tr|E1B7Q3|E1B7Q3_BOVIN K06246 LAMC2; laminin, gamma 2
Beta5 integrins
alpha V beta 5
ITGB5; integrin beta 5 [KO:K06588]
tr|A4FV05|A4FV05_BOVIN K06823 COL18A; collagen, type XVIII, alpha	Extracellular matrix (ECM) components
tr|L8HY22|L8HY22_9CETA K06251 VTN; vitronectin	Extracellular matrix (ECM) components
sp|P55906|BGH3_BOVIN K19519 TGFBI, BIGH3; transforming growth factor-beta-induced protein	Extracellular matrix (ECM) components
sp|P21214|TGFB2_BOVIN K13376 TGFB2; transforming growth factor beta-2	Soluble ligands
tr|L8IYJ5|L8IYJ5_9CETA K06829 CYR61; cysteine rich protein 61	Soluble ligands
Beta6 integrins
alpha V beta 6
ITGB6; integrin beta 6 [KO:K06589]
sp|P07589|FINC_BOVIN K05717 FN1; fibronectin 1	Extracellular matrix (ECM) components
tr|F1MPK6|F1MPK6_BOVIN K06252 TN; tenascin	Extracellular matrix (ECM) components
tr|E1BB79|E1BB79_BOVIN K06252 TN; tenascin	Extracellular matrix (ECM) components
tr|A0JN60|A0JN60_BOVIN K06252 TN; tenascin	Extracellular matrix (ECM) components
sp|P21214|TGFB2_BOVIN K13376 TGFB2; transforming growth factor beta-2	Soluble ligands
Beta7 integrins
alpha 4 beta 7
ITGB7; integrin beta 7 [KO:K06590]
tr|Q9GKR3|Q9GKR3_BOVIN K06527 VCAM1, CD106; vascular cell adhesion molecule 1	Cell adhesion molecules (CAMs)
sp|P07589|FINC_BOVIN K05717 FN1; fibronectin 1	Extracellular matrix (ECM) components
alpha E beta 7
ITGB7; integrin beta 7 [KO:K06590]
sp|Q6R8F2|CADH1_BOVIN K05689 CDH1, CDHE, CD324; cadherin 1, type 1, E-cadherin	Cell adhesion molecules (CAMs)
Beta8 integrins
alpha V beta 8
ITGB8; integrin beta 8 [KO:K06591]
tr|F1N474|F1N474_BOVIN K06237 COL4A; collagen, type IV, alpha	Extracellular matrix (ECM) components
tr|F1MJ71|F1MJ71_BOVIN K06237 COL4A; collagen, type IV, alpha	Extracellular matrix (ECM) components
tr|F1MZU6|F1MZU6_BOVIN K06237 COL4A; collagen, type IV, alpha	Extracellular matrix (ECM) components
tr|F1N7Q7|F1N7Q7_BOVIN K06237 COL4A; collagen, type IV, alpha	Extracellular matrix (ECM) components
sp|Q7SIB2|CO4A1_BOVIN K06237 COL4A; collagen, type IV, alpha	Extracellular matrix (ECM) components
sp|P07589|FINC_BOVIN K05717 FN1; fibronectin 1	Extracellular matrix (ECM) components
tr|L8HY22|L8HY22_9CETA K06251 VTN; vitronectin	Extracellular matrix (ECM) components
sp|P21214|TGFB2_BOVIN K13376 TGFB2; transforming growth factor beta-2	Soluble ligands
3. Selectin Family
SELL; selectin, lymphocyte [KO:K06495]
sp|P81282|CSPG2_BOVIN K06793 VCAN, CSPG2; versican core protein	Cell adhesion molecules (CAMs)
SELE; selectin, endothelial cell [KO:K06494]
tr|E1BKM1|E1BKM1_BOVIN K06499 CEACAM, CD66; carcinoembryonic antigen-related cell adhesion molecule	Cell adhesion molecules (CAMs)
tr|F1MU33|F1MU33_BOVIN K06499 CEACAM, CD66; carcinoembryonic antigen-related cell adhesion molecule	Cell adhesion molecules (CAMs)
tr|F1N2U9|F1N2U9_BOVIN K06499 CEACAM, CD66; carcinoembryonic antigen-related cell adhesion molecule	Cell adhesion molecules (CAMs)
CR3, Mac-1	Cell adhesion molecules (CAMs)
tr|Q24LN2|Q24LN2_BOVIN K06461 ITGAM, CD11b; integrin alpha M
sp|P32592|ITB2_BOVIN K06464 ITGB2, CD18; integrin beta 2
tr|E1BDY3|E1BDY3_BOVIN K06816 GLG1, ESL1; golgi apparatus protein 1	Cell adhesion molecules (CAMs)
4. Link Protein Family
CD44; CD44 antigen [KO:K06256]
sp|P81282|CSPG2_BOVIN K06793 VCAN, CSPG2; versican core protein	Cell adhesion molecules (CAMs)
sp|P02453|CO1A1_BOVIN K06236 COL1A; collagen, type I, alpha	Extracellular matrix (ECM) components
sp|P02465|CO1A2_BOVIN K06236 COL1A; collagen, type I, alpha	Extracellular matrix (ECM) components
tr|F1N474|F1N474_BOVIN K06237 COL4A; collagen, type IV, alpha	Extracellular matrix (ECM) components
tr|F1MJ71|F1MJ71_BOVIN K06237 COL4A; collagen, type IV, alpha	Extracellular matrix (ECM) components
tr|F1MZU6|F1MZU6_BOVIN K06237 COL4A; collagen, type IV, alpha	Extracellular matrix (ECM) components
tr|F1N7Q7|F1N7Q7_BOVIN K06237 COL4A; collagen, type IV, alpha	Extracellular matrix (ECM) components
sp|Q7SIB2|CO4A1_BOVIN K06237 COL4A; collagen, type IV, alpha	Extracellular matrix (ECM) components
sp|P07589|FINC_BOVIN K05717 FN1; fibronectin 1	Extracellular matrix (ECM) components
tr|E1BGJ0|E1BGJ0_BOVIN K04550 LRP1, CD91; low-density lipoprotein receptor-related protein 1 (alpha-2-macroglobulin receptor)	Other cell surface / pericellular molecules
AGC1, CSPG1; aggrecan 1 [KO:K06792]
tr|F1ML13|F1ML13_BOVIN K06841 SEMA5; semaphorin 5	Other cell surface / pericellular molecules
VCAN, CSPG2; versican core protein [KO:K06793]
tr|F1ML13|F1ML13_BOVIN K06841 SEMA5; semaphorin 5	Other cell surface / pericellular molecules
NCAN, CSPG3; neurocan core protein [KO:K06794]
tr|F1MM03|F1MM03_BOVIN K06491 NCAM, CD56; neural cell adhesion molecule	Cell adhesion molecules (CAMs)
sp|P31836|NCAM1_BOVIN K06491 NCAM, CD56; neural cell adhesion molecule	Cell adhesion molecules (CAMs)
tr|E1BLM2|E1BLM2_BOVIN K06756 NRCAM; neuronal cell adhesion molecule	Cell adhesion molecules (CAMs)
tr|E1BBI3|E1BBI3_BOVIN K06550 L1CAM, CD171; L1 cell adhesion molecule	Cell adhesion molecules (CAMs)
tr|E1BIU8|E1BIU8_BOVIN K06778 PTPRS; receptor-type tyrosine-protein phosphatase S [EC:3.1.3.48]	Cell adhesion molecules (CAMs)
tr|F1ML13|F1ML13_BOVIN K06841 SEMA5; semaphorin 5	Other cell surface / pericellular molecules
CSPG4; chondroitin sulfate proteoglycan 4 [KO:K08115]
tr|F1ML13|F1ML13_BOVIN K06841 SEMA5; semaphorin 5	Other cell surface / pericellular molecules
BCAN; brevican [KO:K06795]
tr|F1ML13|F1ML13_BOVIN K06841 SEMA5; semaphorin 5	Other cell surface / pericellular molecules
PTPRZ; receptor-type tyrosine-protein phosphatase zeta [KO:K08114]
tr|E1BLM2|E1BLM2_BOVIN K06756 NRCAM; neuronal cell adhesion molecule	Cell adhesion molecules (CAMs)
sp|Q28106|CNTN1_BOVIN K06759 CNTN1; contactin 1	Cell adhesion molecules (CAMs)
tr|F1ML13|F1ML13_BOVIN K06841 SEMA5; semaphorin 5	Other cell surface / pericellular molecules
5. Cadherin Family
Classic Cadherins
Vertebrate Type I classic cadherins
CDHE, CDH1; cadherin 1, type 1, E-cadherin [KO:K05689]
sp|Q6R8F2|CADH1_BOVIN K05689 CDH1, CDHE, CD324; cadherin 1, type 1, E-cadherin	Cell adhesion molecules (CAMs)
VLA-2	Cell adhesion molecules (CAMs)
sp|P53712-2|ITB1_BOVIN K05719 ITGB1, CD29; integrin beta 1
alpha E beta 7	Cell adhesion molecules (CAMs)
tr|E1BFX5|E1BFX5_BOVIN K06524 ITGAE, CD103; integrin alpha E
tr|A7YWN9|A7YWN9_BOVIN K06590 ITGB7; integrin beta 7
CDH2; cadherin 2, type 1, N-cadherin [KO:K06736]
sp|P19534|CADH2_BOVIN K06736 CDH2, CDHN, CD325; cadherin 2, type 1, N-cadherin	Cell adhesion molecules (CAMs)
tr|F1MN51|F1MN51_BOVIN K05095 FGFR4, CD334; fibroblast growth factor receptor 4 [EC:2.7.10.1]	Cell adhesion molecules (CAMs)
tr|G3N093|G3N093_BOVIN K06732 CDCP1, CD318; CUB domain-containing protein 1	Other cell surface / pericellular molecules
CDH3; cadherin 3, type 1, P-cadherin [KO:K06796]
tr|G3N093|G3N093_BOVIN K06732 CDCP1, CD318; CUB domain-containing protein 1	Other cell surface / pericellular molecules
CDH4; cadherin 4, type 1, R-cadherin [KO:K06797]
sp|P19534|CADH2_BOVIN K06736 CDH2, CDHN, CD325; cadherin 2, type 1, N-cadherin	Cell adhesion molecules (CAMs)
Vertebrate Type II classic cadherins
CDH5; cadherin 5, type 2, VE-cadherin [KO:K06533]
sp|Q6URK6|CADH5_BOVIN K06533 CDH5, CD144; cadherin 5, type 2, VE-cadherin	Cell adhesion molecules (CAMs)
tr|E1BFE2|E1BFE2_BOVIN K05694 PTPRB, PTPB; receptor-type tyrosine-protein phosphatase beta [EC:3.1.3.48]	Cell adhesion molecules (CAMs)
CDH6; cadherin 6, type 2, K-cadherin [KO:K06798]
alpha IIb beta 3	Cell adhesion molecules (CAMs)
tr|A6QLB3|A6QLB3_BOVIN K06476 ITGA2B, CD41; integrin alpha 2B
sp|Q3SWX5|CADH6_BOVIN K06798 CDH6; cadherin 6, type 2, K-cadherin	Cell adhesion molecules (CAMs)
tr|E1BF53|E1BF53_BOVIN K06799 CDH7; cadherin 7, type 2	Cell adhesion molecules (CAMs)
tr|E1BIA5|E1BIA5_BOVIN K06802 CDH10; cadherin 10, type 2, T2-cadherin	Cell adhesion molecules (CAMs)
tr|A6QP71|A6QP71_BOVIN K06809 CDH15, CDH3, CDH14; cadherin 15, M-cadherin	Cell adhesion molecules (CAMs)
CDH7; cadherin 7, type 2 [KO:K06799]
sp|Q3SWX5|CADH6_BOVIN K06798 CDH6; cadherin 6, type 2, K-cadherin	Cell adhesion molecules (CAMs)
tr|E1BF53|E1BF53_BOVIN K06799 CDH7; cadherin 7, type 2	Cell adhesion molecules (CAMs)
tr|F1N7M2|F1N7M2_BOVIN K06804 CDH12; cadherin 12, type 2, N-cadherin 2	Cell adhesion molecules (CAMs)
tr|A6QP71|A6QP71_BOVIN K06809 CDH15, CDH3, CDH14; cadherin 15, M-cadherin	Cell adhesion molecules (CAMs)
CDH8; cadherin 8, type 2 [KO:K06800]
tr|Q58DE3|Q58DE3_BOVIN K06800 CDH8; cadherin 8, type 2	Cell adhesion molecules (CAMs)
tr|A2VDQ6|A2VDQ6_BOVIN K06803 CDH11; cadherin 11, type 2, OB-cadherin	Cell adhesion molecules (CAMs)
CDH9; cadherin 9, type 2, T1-cadherin [KO:K06801]
sp|Q3SWX5|CADH6_BOVIN K06798 CDH6; cadherin 6, type 2, K-cadherin	Cell adhesion molecules (CAMs)
tr|E1BF53|E1BF53_BOVIN K06799 CDH7; cadherin 7, type 2	Cell adhesion molecules (CAMs)
tr|E1BIA5|E1BIA5_BOVIN K06802 CDH10; cadherin 10, type 2, T2-cadherin	Cell adhesion molecules (CAMs)
tr|A6QP71|A6QP71_BOVIN K06809 CDH15, CDH3, CDH14; cadherin 15, M-cadherin	Cell adhesion molecules (CAMs)
CDH10; cadherin 10, type 2, T2-cadherin [KO:K06802]
sp|Q3SWX5|CADH6_BOVIN K06798 CDH6; cadherin 6, type 2, K-cadherin	Cell adhesion molecules (CAMs)
tr|E1BIA5|E1BIA5_BOVIN K06802 CDH10; cadherin 10, type 2, T2-cadherin	Cell adhesion molecules (CAMs)
CDH11; cadherin 11, type 2, OB-cadherin [KO:K06803]
tr|Q58DE3|Q58DE3_BOVIN K06800 CDH8; cadherin 8, type 2	Cell adhesion molecules (CAMs)
tr|A2VDQ6|A2VDQ6_BOVIN K06803 CDH11; cadherin 11, type 2, OB-cadherin	Cell adhesion molecules (CAMs)
CDH12; cadherin 12, type 2, N-cadherin 2 [KO:K06804]
tr|E1BF53|E1BF53_BOVIN K06799 CDH7; cadherin 7, type 2	Cell adhesion molecules (CAMs)
tr|F1N7M2|F1N7M2_BOVIN K06804 CDH12; cadherin 12, type 2, N-cadherin 2	Cell adhesion molecules (CAMs)
tr|A6QP71|A6QP71_BOVIN K06809 CDH15, CDH3, CDH14; cadherin 15, M-cadherin	Cell adhesion molecules (CAMs)
CDH18; cadherin 18, type 2 [KO:K06805]
sp|Q08DJ5|CAD18_BOVIN K06805 CDH18; cadherin 18, type 2	Cell adhesion molecules (CAMs)
CDH19; cadherin 19, type 2 [KO:K06806]
tr|E1BGM9|E1BGM9_BOVIN K06806 CDH19; cadherin 19, type 2	Cell adhesion molecules (CAMs)
CDH20; cadherin 20, type 2 [KO:K06807]
tr|E1BAM8|E1BAM8_BOVIN K06807 CDH20; cadherin 20, type 2	Cell adhesion molecules (CAMs)
Other classic cadherins
CDH15, CDH3, CDH14; cadherin 15, M-cadherin [KO:K06809]
sp|Q3SWX5|CADH6_BOVIN K06798 CDH6; cadherin 6, type 2, K-cadherin	Cell adhesion molecules (CAMs)
tr|E1BF53|E1BF53_BOVIN K06799 CDH7; cadherin 7, type 2	Cell adhesion molecules (CAMs)
tr|F1N7M2|F1N7M2_BOVIN K06804 CDH12; cadherin 12, type 2, N-cadherin 2	Cell adhesion molecules (CAMs)
tr|A6QP71|A6QP71_BOVIN K06809 CDH15, CDH3, CDH14; cadherin 15, M-cadherin	Cell adhesion molecules (CAMs)
CDH16; cadherin 16, KSP-cadherin [KO:K06810]
tr|L8IH62|L8IH62_9CETA K06810 CDH16; cadherin 16, KSP-cadherin	Cell adhesion molecules (CAMs)
CDH17; cadherin 17, LI cadherin [KO:K06811]
sp|Q6R8F2|CADH1_BOVIN K05689 CDH1, CDHE, CD324; cadherin 1, type 1, E-cadherin	Cell adhesion molecules (CAMs)
CDH22; cadherin 22 [KO:K06812]
tr|F1N416|F1N416_BOVIN K06812 CDH22; cadherin 22	Cell adhesion molecules (CAMs)
CDH23; cadherin 23 [KO:K06813]
tr|G3MYD4|G3MYD4_BOVIN K16500 PCDH15, USH1F; protocadherin-15	Cell adhesion molecules (CAMs)
Clustered protocadherin
PCDHA; protocadherin alpha [KO:K16493]
tr|G3MWT6|G3MWT6_BOVIN K16493 PCDHA; protocadherin alpha	Cell adhesion molecules (CAMs)
tr|F1MTQ6|F1MTQ6_BOVIN K16493 PCDHA; protocadherin alpha	Cell adhesion molecules (CAMs)
VLA-5	Cell adhesion molecules (CAMs)
tr|F1MK44|F1MK44_BOVIN K06484 ITGA5, CD49e; integrin alpha 5
sp|P53712-2|ITB1_BOVIN K05719 ITGB1, CD29; integrin beta 1
PCDHB; protocadherin beta [KO:K16494]
tr|F1MLJ1|F1MLJ1_BOVIN K16494 PCDHB; protocadherin beta	Cell adhesion molecules (CAMs)
tr|A6QPE9|A6QPE9_BOVIN K16494 PCDHB; protocadherin beta	Cell adhesion molecules (CAMs)
tr|F1MZQ8|F1MZQ8_BOVIN K16494 PCDHB; protocadherin beta	Cell adhesion molecules (CAMs)
tr|G3N1D2|G3N1D2_BOVIN K16494 PCDHB; protocadherin beta	Cell adhesion molecules (CAMs)
PCDHGA; protocadherin gamma subfamily A [KO:K16495]
tr|A5D7Q6|A5D7Q6_BOVIN K16495 PCDHGA; protocadherin gamma subfamily A	Cell adhesion molecules (CAMs)
tr|G3MXC4|G3MXC4_BOVIN K16495 PCDHGA; protocadherin gamma subfamily A	Cell adhesion molecules (CAMs)
tr|E1BJP8|E1BJP8_BOVIN K16495 PCDHGA; protocadherin gamma subfamily A	Cell adhesion molecules (CAMs)
tr|A5PKJ8|A5PKJ8_BOVIN K16495 PCDHGA; protocadherin gamma subfamily A	Cell adhesion molecules (CAMs)
PCDHGB; protocadherin gamma subfamily B [KO:K16496]
tr|E1BD40|E1BD40_BOVIN K16496 PCDHGB; protocadherin gamma subfamily B	Cell adhesion molecules (CAMs)
Non-clustered protocadherin
PCDHD1; protocadherin delta 1 [KO:K16498]
tr|F1MMW5|F1MMW5_BOVIN K16498 PCDHD1; protocadherin delta 1	Cell adhesion molecules (CAMs)
tr|F1N446|F1N446_BOVIN K16498 PCDHD1; protocadherin delta 1	Cell adhesion molecules (CAMs)
tr|G3X6Y5|G3X6Y5_BOVIN K16498 PCDHD1; protocadherin delta 1	Cell adhesion molecules (CAMs)
tr|E1BCK4|E1BCK4_BOVIN K16498 PCDHD1; protocadherin delta 1	Cell adhesion molecules (CAMs)
PCDHD2; protocadherin delta 2 [KO:K16499]
sp|A7MB46|PCD18_BOVIN K16499 PCDHD2; protocadherin delta 2	Cell adhesion molecules (CAMs)
tr|E1BAU4|E1BAU4_BOVIN K16499 PCDHD2; protocadherin delta 2	Cell adhesion molecules (CAMs)
tr|E1BDF9|E1BDF9_BOVIN K16499 PCDHD2; protocadherin delta 2	Cell adhesion molecules (CAMs)
tr|A5D7V2|A5D7V2_BOVIN K16499 PCDHD2; protocadherin delta 2	Cell adhesion molecules (CAMs)
tr|F1MEC8|F1MEC8_BOVIN K16499 PCDHD2; protocadherin delta 2	Cell adhesion molecules (CAMs)
tr|F1N2W7|F1N2W7_BOVIN K16499 PCDHD2; protocadherin delta 2	Cell adhesion molecules (CAMs)
PCDH15; protocadherin-15 [KO:K16500]
tr|G3MYD4|G3MYD4_BOVIN K16500 PCDH15, USH1F; protocadherin-15	Cell adhesion molecules (CAMs)
CDHR1, PCDH21; cadherin-related family member 1 [KO:K16501]
sp|Q8WN91|CDHR1_BOVIN K16501 CDHR1, PCDH21; cadherin-related family member 1	Cell adhesion molecules (CAMs)
CDHR2, PCDH24, PCLKC; cadherin-related family member 2 [KO:K16502]
tr|E1BF45|E1BF45_BOVIN K16502 CDHR2, PCDH24, PCLKC; cadherin-related family member 2	Cell adhesion molecules (CAMs)
CDHR3, CDH28; cadherin-related family member 3 [KO:K16503]
tr|F1MVQ2|F1MVQ2_BOVIN K16503 CDHR3, CDH28; cadherin-related family member 3	Cell adhesion molecules (CAMs)
CDHR5, MUCDHL; cadherin-related family member 5 [KO:K16505]
tr|A7E2Z4|A7E2Z4_BOVIN K16505 CDHR5, MUCDHL; cadherin-related family member 5	Cell adhesion molecules (CAMs)
FATs
FAT1_2_3; protocadherin Fat 1/2/3 [KO:K16506]
tr|F1MC84|F1MC84_BOVIN K16506 FAT1_2_3; protocadherin Fat 1/2/3	Cell adhesion molecules (CAMs)
tr|F1MPF3|F1MPF3_BOVIN K16506 FAT1_2_3; protocadherin Fat 1/2/3	Cell adhesion molecules (CAMs)
FAT4; protocadherin Fat 4 [KO:K16669]
tr|E1B949|E1B949_BOVIN K16669 FAT4; protocadherin Fat 4	Cell adhesion molecules (CAMs)
Dachsous
DCHS1_2, PCDH16_23; protocadherin-16/23 [KO:K16507]
tr|F1MQP6|F1MQP6_BOVIN K16507 DCHS1_2, PCDH16_23; protocadherin-16/23	Cell adhesion molecules (CAMs)
tr|E1B969|E1B969_BOVIN K16507 DCHS1_2, PCDH16_23; protocadherin-16/23	Cell adhesion molecules (CAMs)
Flamingos
CELSR1; cadherin EGF LAG seven-pass G-type receptor 1 [KO:K04600]
tr|F1N6Y9|F1N6Y9_BOVIN K04600 CELSR1; cadherin EGF LAG seven-pass G-type receptor 1	Cell adhesion molecules (CAMs)
CELSR2; cadherin EGF LAG seven-pass G-type receptor 2 [KO:K04601]
tr|E1BJ11|E1BJ11_BOVIN K04601 CELSR2; cadherin EGF LAG seven-pass G-type receptor 2	Cell adhesion molecules (CAMs)
CELSR3; cadherin EGF LAG seven-pass G-type receptor 3 [KO:K04602]
tr|F1MHH5|F1MHH5_BOVIN K04602 CELSR3; cadherin EGF LAG seven-pass G-type receptor 3	Cell adhesion molecules (CAMs)
6. Sialomucin Family
GLG1, ESL1; golgi apparatus protein 1 [KO:K06816]
sp|P03969|FGF2_BOVIN K18497 FGF2; fibroblast growth factor 2	Soluble ligands
tr|F1MQA1|F1MQA1_BOVIN K04358 FGF; fibroblast growth factor	Soluble ligands
tr|A6H6W8|A6H6W8_BOVIN K04358 FGF; fibroblast growth factor	Soluble ligands
tr|F1N6G8|F1N6G8_BOVIN K04358 FGF; fibroblast growth factor	Soluble ligands
sp|A0MTF4|FGF5_BOVIN K04358 FGF; fibroblast growth factor	Soluble ligands
tr|E1BLM4|E1BLM4_BOVIN K04358 FGF; fibroblast growth factor	Soluble ligands
tr|E1B753|E1B753_BOVIN K04358 FGF; fibroblast growth factor	Soluble ligands
tr|E1BEB9|E1BEB9_BOVIN K04358 FGF; fibroblast growth factor	Soluble ligands
tr|E1BGY3|E1BGY3_BOVIN K04358 FGF; fibroblast growth factor	Soluble ligands
tr|E1B9I8|E1B9I8_BOVIN K06051 DLL; delta	Other cell surface / pericellular molecules
tr|E1BN18|E1BN18_BOVIN K06051 DLL; delta	Other cell surface / pericellular molecules
tr|L8I4A5|L8I4A5_9CETA K06051 DLL; delta	Other cell surface / pericellular molecules
SPN, CD43; sialophorin [KO:K06477]
tr|E1BGL8|E1BGL8_BOVIN K06548 SN, SIGLEC1, CD169; sialoadhesin	Cell adhesion molecules (CAMs)
CD96; CD96 antigen [KO:K06517]
tr|F1MQJ3|F1MQJ3_BOVIN K06081 PVRL1, CD111; poliovirus receptor-related protein 1	Cell adhesion molecules (CAMs)
7. Others
TNFSF5, CD40L; tumor necrosis factor (ligand) superfamily, member 5 [KO:K03161]
VLA-5	Cell adhesion molecules (CAMs)
tr|F1MK44|F1MK44_BOVIN K06484 ITGA5, CD49e; integrin alpha 5
sp|P53712-2|ITB1_BOVIN K05719 ITGB1, CD29; integrin beta 1
CR3, Mac-1	Cell adhesion molecules (CAMs)
tr|Q24LN2|Q24LN2_BOVIN K06461 ITGAM, CD11b; integrin alpha M
sp|P32592|ITB2_BOVIN K06464 ITGB2, CD18; integrin beta 2
alpha IIb beta 3	Cell adhesion molecules (CAMs)
tr|A6QLB3|A6QLB3_BOVIN K06476 ITGA2B, CD41; integrin alpha 2B
NRP1; neuropilin 1 [KO:K06724]
tr|F1N5F6|F1N5F6_BOVIN K05448 VEGFA; vascular endothelial growth factor A	Soluble ligands
sp|A7MB70|SEM3C_BOVIN K06840 SEMA3; semaphorin 3	Other cell surface / pericellular molecules
tr|F1MGN0|F1MGN0_BOVIN K06840 SEMA3; semaphorin 3	Other cell surface / pericellular molecules
tr|E1B9T2|E1B9T2_BOVIN K06840 SEMA3; semaphorin 3	Other cell surface / pericellular molecules
tr|G3MYK9|G3MYK9_BOVIN K06840 SEMA3; semaphorin 3	Other cell surface / pericellular molecules
tr|F1MEW1|F1MEW1_BOVIN K06840 SEMA3; semaphorin 3	Other cell surface / pericellular molecules
NRP2; neuropilin 2 [KO:K06819]
tr|E1BLM2|E1BLM2_BOVIN K06756 NRCAM; neuronal cell adhesion molecule	Cell adhesion molecules (CAMs)
tr|F1N5F6|F1N5F6_BOVIN K05448 VEGFA; vascular endothelial growth factor A	Soluble ligands
sp|A7MB70|SEM3C_BOVIN K06840 SEMA3; semaphorin 3	Other cell surface / pericellular molecules
tr|F1MGN0|F1MGN0_BOVIN K06840 SEMA3; semaphorin 3	Other cell surface / pericellular molecules
tr|E1B9T2|E1B9T2_BOVIN K06840 SEMA3; semaphorin 3	Other cell surface / pericellular molecules
tr|G3MYK9|G3MYK9_BOVIN K06840 SEMA3; semaphorin 3	Other cell surface / pericellular molecules
tr|F1MEW1|F1MEW1_BOVIN K06840 SEMA3; semaphorin 3	Other cell surface / pericellular molecules
tr|E1BDM5|E1BDM5_BOVIN K06521 SEMA4, CD100; semaphorin 4	Other cell surface / pericellular molecules
tr|A6QLV9|A6QLV9_BOVIN K06521 SEMA4, CD100; semaphorin 4	Other cell surface / pericellular molecules
tr|E1BF41|E1BF41_BOVIN K06521 SEMA4, CD100; semaphorin 4	Other cell surface / pericellular molecules
tr|F1MYZ4|F1MYZ4_BOVIN K06521 SEMA4, CD100; semaphorin 4	Other cell surface / pericellular molecules
PLXNA; plexin A [KO:K06820]
tr|E1BLM2|E1BLM2_BOVIN K06756 NRCAM; neuronal cell adhesion molecule	Cell adhesion molecules (CAMs)
sp|A7MB70|SEM3C_BOVIN K06840 SEMA3; semaphorin 3	Other cell surface / pericellular molecules
tr|F1MGN0|F1MGN0_BOVIN K06840 SEMA3; semaphorin 3	Other cell surface / pericellular molecules
tr|E1B9T2|E1B9T2_BOVIN K06840 SEMA3; semaphorin 3	Other cell surface / pericellular molecules
tr|G3MYK9|G3MYK9_BOVIN K06840 SEMA3; semaphorin 3	Other cell surface / pericellular molecules
tr|F1MEW1|F1MEW1_BOVIN K06840 SEMA3; semaphorin 3	Other cell surface / pericellular molecules
tr|E1BDM5|E1BDM5_BOVIN K06521 SEMA4, CD100; semaphorin 4	Other cell surface / pericellular molecules
tr|A6QLV9|A6QLV9_BOVIN K06521 SEMA4, CD100; semaphorin 4	Other cell surface / pericellular molecules
tr|E1BF41|E1BF41_BOVIN K06521 SEMA4, CD100; semaphorin 4	Other cell surface / pericellular molecules
tr|F1MYZ4|F1MYZ4_BOVIN K06521 SEMA4, CD100; semaphorin 4	Other cell surface / pericellular molecules
tr|A1L580|A1L580_BOVIN K06842 SEMA6; semaphorin 6	Other cell surface / pericellular molecules
tr|E1BG65|E1BG65_BOVIN K06842 SEMA6; semaphorin 6	Other cell surface / pericellular molecules
tr|E1BIT8|E1BIT8_BOVIN K06842 SEMA6; semaphorin 6	Other cell surface / pericellular molecules
tr|E1BNY3|E1BNY3_BOVIN K06842 SEMA6; semaphorin 6	Other cell surface / pericellular molecules
PLXNB; plexin B [KO:K06821]
tr|E1BDM5|E1BDM5_BOVIN K06521 SEMA4, CD100; semaphorin 4	Other cell surface / pericellular molecules
tr|A6QLV9|A6QLV9_BOVIN K06521 SEMA4, CD100; semaphorin 4	Other cell surface / pericellular molecules
tr|E1BF41|E1BF41_BOVIN K06521 SEMA4, CD100; semaphorin 4	Other cell surface / pericellular molecules
tr|F1MYZ4|F1MYZ4_BOVIN K06521 SEMA4, CD100; semaphorin 4	Other cell surface / pericellular molecules
tr|F1ML13|F1ML13_BOVIN K06841 SEMA5; semaphorin 5	Other cell surface / pericellular molecules
PLXND; plexin D [KO:K06822]
sp|A7MB70|SEM3C_BOVIN K06840 SEMA3; semaphorin 3	Other cell surface / pericellular molecules
tr|F1MGN0|F1MGN0_BOVIN K06840 SEMA3; semaphorin 3	Other cell surface / pericellular molecules
tr|E1B9T2|E1B9T2_BOVIN K06840 SEMA3; semaphorin 3	Other cell surface / pericellular molecules
tr|G3MYK9|G3MYK9_BOVIN K06840 SEMA3; semaphorin 3	Other cell surface / pericellular molecules
tr|F1MEW1|F1MEW1_BOVIN K06840 SEMA3; semaphorin 3	Other cell surface / pericellular molecules
SDC1; syndecan 1 [KO:K06257]
VLA-5	Cell adhesion molecules (CAMs)
tr|F1MK44|F1MK44_BOVIN K06484 ITGA5, CD49e; integrin alpha 5
sp|P53712-2|ITB1_BOVIN K05719 ITGB1, CD29; integrin beta 1
VNR	Cell adhesion molecules (CAMs)
sp|P80746|ITAV_BOVIN K06487 ITGAV, CD51; integrin alpha V
alpha 6 beta 4	Cell adhesion molecules (CAMs)
tr|E1BFQ6|E1BFQ6_BOVIN K06485 ITGA6, CD49f; integrin alpha 6
tr|E1B864|E1B864_BOVIN K06525 ITGB4, CD104; integrin beta 4
alpha V beta 5	Cell adhesion molecules (CAMs)
sp|P80746|ITAV_BOVIN K06487 ITGAV, CD51; integrin alpha V
sp|P80747|ITB5_BOVIN K06588 ITGB5; integrin beta 5
sp|P02453|CO1A1_BOVIN K06236 COL1A; collagen, type I, alpha	Extracellular matrix (ECM) components
sp|P02465|CO1A2_BOVIN K06236 COL1A; collagen, type I, alpha	Extracellular matrix (ECM) components
sp|P07589|FINC_BOVIN K05717 FN1; fibronectin 1	Extracellular matrix (ECM) components
tr|F1MPK6|F1MPK6_BOVIN K06252 TN; tenascin	Extracellular matrix (ECM) components
tr|E1BB79|E1BB79_BOVIN K06252 TN; tenascin	Extracellular matrix (ECM) components
tr|A0JN60|A0JN60_BOVIN K06252 TN; tenascin	Extracellular matrix (ECM) components
sp|Q76BS1|HGF_BOVIN K05460 HGF; hepatocyte growth factor	Soluble ligands
tr|G3N093|G3N093_BOVIN K06732 CDCP1, CD318; CUB domain-containing protein 1	Other cell surface / pericellular molecules
SDC4; syndecan 4 [KO:K16338]
VLA-5	Cell adhesion molecules (CAMs)
tr|F1MK44|F1MK44_BOVIN K06484 ITGA5, CD49e; integrin alpha 5
sp|P53712-2|ITB1_BOVIN K05719 ITGB1, CD29; integrin beta 1
alpha 6 beta 4	Cell adhesion molecules (CAMs)
tr|E1BFQ6|E1BFQ6_BOVIN K06485 ITGA6, CD49f; integrin alpha 6
tr|E1B864|E1B864_BOVIN K06525 ITGB4, CD104; integrin beta 4
sp|Q95116|TSP2_BOVIN K04659 THBS2S; thrombospondin 2/3/4/5	Extracellular matrix (ECM) components
sp|P35445|COMP_BOVIN K04659 THBS2S; thrombospondin 2/3/4/5	Extracellular matrix (ECM) components
sp|Q3SWW8|TSP4_BOVIN K04659 THBS2S; thrombospondin 2/3/4/5	Extracellular matrix (ECM) components
tr|A6QQT1|A6QQT1_BOVIN K04659 THBS2S; thrombospondin 2/3/4/5	Extracellular matrix (ECM) components
tr|F1MTZ9|F1MTZ9_BOVIN K04659 THBS2S; thrombospondin 2/3/4/5	Extracellular matrix (ECM) components
sp|P07589|FINC_BOVIN K05717 FN1; fibronectin 1	Extracellular matrix (ECM) components
tr|F1MPK6|F1MPK6_BOVIN K06252 TN; tenascin	Extracellular matrix (ECM) components
tr|E1BB79|E1BB79_BOVIN K06252 TN; tenascin	Extracellular matrix (ECM) components
tr|A0JN60|A0JN60_BOVIN K06252 TN; tenascin	Extracellular matrix (ECM) components
sp|P03969|FGF2_BOVIN K18497 FGF2; fibroblast growth factor 2	Soluble ligands
tr|F1MQA1|F1MQA1_BOVIN K04358 FGF; fibroblast growth factor	Soluble ligands
tr|A6H6W8|A6H6W8_BOVIN K04358 FGF; fibroblast growth factor	Soluble ligands
tr|F1N6G8|F1N6G8_BOVIN K04358 FGF; fibroblast growth factor	Soluble ligands
sp|A0MTF4|FGF5_BOVIN K04358 FGF; fibroblast growth factor	Soluble ligands
tr|E1BLM4|E1BLM4_BOVIN K04358 FGF; fibroblast growth factor	Soluble ligands
tr|E1B753|E1B753_BOVIN K04358 FGF; fibroblast growth factor	Soluble ligands
tr|E1BEB9|E1BEB9_BOVIN K04358 FGF; fibroblast growth factor	Soluble ligands
tr|E1BGY3|E1BGY3_BOVIN K04358 FGF; fibroblast growth factor	Soluble ligands
tr|G3N093|G3N093_BOVIN K06732 CDCP1, CD318; CUB domain-containing protein 1	Other cell surface / pericellular molecules
NRXN; neurexin [KO:K07377]
tr|F1N104|F1N104_BOVIN K07378 NLGN; neuroligin	Cell adhesion molecules (CAMs)
tr|F1N7D7|F1N7D7_BOVIN K06265 DAG1; dystroglycan 1	Cell adhesion molecules (CAMs)
tr|A6H701|A6H701_BOVIN K16665 LRRTM1_2; leucine-rich repeat transmembrane neuronal protein 1/2	Cell adhesion molecules (CAMs)
NLGN; neuroligin [KO:K07378]
sp|Q28146-6|NRX1A_BOVIN K07377 NRXN; neurexin	Cell adhesion molecules (CAMs)
tr|E1BFN9|E1BFN9_BOVIN K07377 NRXN; neurexin	Cell adhesion molecules (CAMs)
DAG1; dystroglycan 1 [KO:K06265]
sp|Q28146-6|NRX1A_BOVIN K07377 NRXN; neurexin	Cell adhesion molecules (CAMs)
tr|E1BFN9|E1BFN9_BOVIN K07377 NRXN; neurexin	Cell adhesion molecules (CAMs)
Laminin-1	Extracellular matrix (ECM) components
tr|F1MNT4|F1MNT4_BOVIN K05636 LAMB1; laminin, beta 1
tr|F1MD77|F1MD77_BOVIN K05635 LAMC1; laminin, gamma 1
Laminin-2	Extracellular matrix (ECM) components
tr|F1MNT4|F1MNT4_BOVIN K05636 LAMB1; laminin, beta 1
tr|F1MD77|F1MD77_BOVIN K05635 LAMC1; laminin, gamma 1
tr|F1MER7|F1MER7_BOVIN K06255 HSPG2; heparan sulfate proteoglycan 2 (perlecan)	Extracellular matrix (ECM) components
LRRTM1_2; leucine-rich repeat transmembrane neuronal protein 1/2 [KO:K16665]
sp|Q28146-6|NRX1A_BOVIN K07377 NRXN; neurexin	Cell adhesion molecules (CAMs)
tr|E1BFN9|E1BFN9_BOVIN K07377 NRXN; neurexin	Cell adhesion molecules (CAMs)
APP; amyloid beta A4 protein [KO:K04520]
tr|F1N474|F1N474_BOVIN K06237 COL4A; collagen, type IV, alpha	Extracellular matrix (ECM) components
tr|F1MJ71|F1MJ71_BOVIN K06237 COL4A; collagen, type IV, alpha	Extracellular matrix (ECM) components
tr|F1MZU6|F1MZU6_BOVIN K06237 COL4A; collagen, type IV, alpha	Extracellular matrix (ECM) components
tr|F1N7Q7|F1N7Q7_BOVIN K06237 COL4A; collagen, type IV, alpha	Extracellular matrix (ECM) components
sp|Q7SIB2|CO4A1_BOVIN K06237 COL4A; collagen, type IV, alpha	Extracellular matrix (ECM) components
Laminin-1	Extracellular matrix (ECM) components
tr|F1MNT4|F1MNT4_BOVIN K05636 LAMB1; laminin, beta 1
tr|F1MD77|F1MD77_BOVIN K05635 LAMC1; laminin, gamma 1
PTPRG; receptor-type tyrosine-protein phosphatase gamma [KO:K16667]
tr|E1B7U4|E1B7U4_BOVIN K06761 CNTN3; contactin 3	Cell adhesion molecules (CAMs)
tr|F1MXS0|F1MXS0_BOVIN K06764 CNTN6; contactin 6	Cell adhesion molecules (CAMs)
NTNG2; netrin-G2 [KO:K16359]
tr|Q3I0Y3|Q3I0Y3_BOVIN K16351 LRRC4, NGL2; netrin-G2 ligand	Cell adhesion molecules (CAMs)
FLRT; leucine-rich repeat transmembrane protein FLRT [KO:K16362]
tr|F1MQ73|F1MQ73_BOVIN K07521 UNC5; netrin receptor unc-5	Cell adhesion molecules (CAMs)
tr|A5PJP9|A5PJP9_BOVIN K07521 UNC5; netrin receptor unc-5	Cell adhesion molecules (CAMs)
tr|F1MHX0|F1MHX0_BOVIN K07521 UNC5; netrin receptor unc-5	Cell adhesion molecules (CAMs)
CD209; CD209 antigen [KO:K06563]
tr|E1BKM1|E1BKM1_BOVIN K06499 CEACAM, CD66; carcinoembryonic antigen-related cell adhesion molecule	Cell adhesion molecules (CAMs)
tr|F1MU33|F1MU33_BOVIN K06499 CEACAM, CD66; carcinoembryonic antigen-related cell adhesion molecule	Cell adhesion molecules (CAMs)
tr|F1N2U9|F1N2U9_BOVIN K06499 CEACAM, CD66; carcinoembryonic antigen-related cell adhesion molecule	Cell adhesion molecules (CAMs)
CR3, Mac-1	Cell adhesion molecules (CAMs)
tr|Q24LN2|Q24LN2_BOVIN K06461 ITGAM, CD11b; integrin alpha M
sp|P32592|ITB2_BOVIN K06464 ITGB2, CD18; integrin beta 2
EFNA; ephrin-A [KO:K05462]
tr|F1MFH7|F1MFH7_BOVIN K05102 EPHA1, EPH; Eph receptor A1 [EC:2.7.10.1]	Cell adhesion molecules (CAMs)
tr|E1BJS9|E1BJS9_BOVIN K05104 EPHA3, HEK, TYRO4; Eph receptor A3 [EC:2.7.10.1]	Cell adhesion molecules (CAMs)
tr|F1N781|F1N781_BOVIN K05106 EPHA5, EHK1, TYRO4; Eph receptor A5 [EC:2.7.10.1]	Cell adhesion molecules (CAMs)
tr|F1N780|F1N780_BOVIN K05108 EPHA7, EHK3, HEK11; EphA7 [EC:2.7.10.1]	Cell adhesion molecules (CAMs)
tr|F1N6H6|F1N6H6_BOVIN K08897 EPHA10; Eph receptor A10 [EC:2.7.10.1]	Cell adhesion molecules (CAMs)
EPHA4, SEK, TYRO1; Eph receptor A4 [KO:K05105]
tr|E1BA87|E1BA87_BOVIN K05463 EFNB; ephrin-B	Cell adhesion molecules (CAMs)
EFNB; ephrin-B [KO:K05463]
tr|F1ML02|F1ML02_BOVIN K05112 EPHB3, HEK2, ETK2; Eph receptor B3 [EC:2.7.10.1]	Cell adhesion molecules (CAMs)
tr|F1N5D4|F1N5D4_BOVIN K05114 EPHB6; Eph receptor B6 [EC:2.7.10.1]	Cell adhesion molecules (CAMs)
EPHB1, ELK, NET; Eph receptor B1 [KO:K05110]
tr|E1BA87|E1BA87_BOVIN K05463 EFNB; ephrin-B	Cell adhesion molecules (CAMs)
EPHB2, ERK, DRT; Eph receptor B2 [KO:K05111]
tr|E1BA87|E1BA87_BOVIN K05463 EFNB; ephrin-B	Cell adhesion molecules (CAMs)
EPHB3; EPHB3, HEK2, ETK2; Eph receptor B3 [KO:K05112]
tr|E1BA87|E1BA87_BOVIN K05463 EFNB; ephrin-B	Cell adhesion molecules (CAMs)
EPHB4; EPHB4, HTK; Eph receptor B4 [KO:K05113]
tr|E1BA87|E1BA87_BOVIN K05463 EFNB; ephrin-B	Cell adhesion molecules (CAMs)
EPHB6; Eph receptor B6 [KO:K05114]
tr|E1BA87|E1BA87_BOVIN K05463 EFNB; ephrin-B	Cell adhesion molecules (CAMs)

## Sheet: Cytokines (56)
Cytokines (56)
Class I cytokines (hematopoietin family)
IL-2 receptor family
sp|Q76LU5|IL21_BOVIN K05434 IL21; interleukin 21
IL-6 receptor family
sp|P53346|ONCM_BOVIN K05418 OSM; oncostatin M
Single chain family
sp|P09611|CSH1_BOVIN K05439 PRL; prolactin
tr|F1MB76|F1MB76_BOVIN K05439 PRL; prolactin
Class II cytokines (interferon/IL-10 family)
Type I interferons
tr|Q52NK2|Q52NK2_BOVIN K05440 IFNW; interferon omega
tr|G3MZ20|G3MZ20_BOVIN K05440 IFNW; interferon omega
tr|E1B8L4|E1B8L4_BOVIN K05440 IFNW; interferon omega
tr|E1BMT4|E1BMT4_BOVIN K05440 IFNW; interferon omega
tr|F1MK67|F1MK67_BOVIN K05442 IFNE; interferon epsilon
Type II interferons
sp|P07353|IFNG_BOVIN K04687 IFNG; interferon gamma
Type III interferons
tr|G3N0M3|G3N0M3_BOVIN K05447 IL28_29, IFNL; interleukin 28/29 (interferon lambda)
PDGF family
Cysteine-knot growth factors
Subclass I
tr|F1N5F6|F1N5F6_BOVIN K05448 VEGFA; vascular endothelial growth factor A
sp|Q2KJ15|PDGFA_BOVIN K04359 PDGFA; platelet-derived growth factor subunit A
tr|B1H0W5|B1H0W5_BOVIN K17386 PDGFB; platelet-derived growth factor subunit B
tr|A4IFC0|A4IFC0_BOVIN K05450 PDGFC_D; platelet derived growth factor C/D
Subclass II
sp|Q08DT3|NTF3_BOVIN K04356 NTF3; neurotrophin 3
tr|G3MYR8|G3MYR8_BOVIN K12457 NTF4; neurotrophin 4
4-Helix bundle growth factors
tr|A2VE24|A2VE24_BOVIN K05454 FLT3LG; fms-related tyrosine kinase 3 ligand
Beta-trefoil growth factors
sp|P03969|FGF2_BOVIN K18497 FGF2; fibroblast growth factor 2
tr|F1MQA1|F1MQA1_BOVIN K04358 FGF; fibroblast growth factor
tr|A6H6W8|A6H6W8_BOVIN K04358 FGF; fibroblast growth factor
tr|F1N6G8|F1N6G8_BOVIN K04358 FGF; fibroblast growth factor
sp|A0MTF4|FGF5_BOVIN K04358 FGF; fibroblast growth factor
tr|E1BLM4|E1BLM4_BOVIN K04358 FGF; fibroblast growth factor
tr|E1B753|E1B753_BOVIN K04358 FGF; fibroblast growth factor
tr|E1BEB9|E1BEB9_BOVIN K04358 FGF; fibroblast growth factor
tr|E1BGY3|E1BGY3_BOVIN K04358 FGF; fibroblast growth factor
Other growth factors
tr|F1MPD0|F1MPD0_BOVIN K05455 NRG1; neuregulin 1
tr|G3N0G5|G3N0G5_BOVIN K05456 NRG2; neuregulin 2
tr|F1MS28|F1MS28_BOVIN K05457 NRG3; neuregulin 3
sp|P07455|IGF1_BOVIN K05459 IGF1; insulin-like growth factor 1
sp|Q76BS1|HGF_BOVIN K05460 HGF; hepatocyte growth factor
tr|Q866N1|Q866N1_BOVIN K04357 EGF; epidermal growth factor
tr|Q866M9|Q866M9_BOVIN K04357 EGF; epidermal growth factor
sp|Q28132|SCF_BOVIN K05461 KITLG; KIT ligand
tr|E1BA87|E1BA87_BOVIN K05463 EFNB; ephrin-B
sp|O18920|ANGP1_BOVIN K05465 ANGPT1; angiopoietin 1
tr|B2Z4B2|B2Z4B2_BOVIN K05467 ANGPT4; angiopoietin 4
TNF family
tr|E1BE56|E1BE56_BOVIN K04721 TNFSF10, TRAIL, CD253; tumor necrosis factor ligand superfamily member 10
tr|E1BIP0|E1BIP0_BOVIN K05473 TNFSF11, RANKL, CD254; tumor necrosis factor ligand superfamily member 11
tr|F1AGC7|F1AGC7_BOVIN K05474 TNFSF12, TWEAK; tumor necrosis factor ligand superfamily member 12
IL-1 family
sp|P08831|IL1A_BOVIN K04383 IL1A; interleukin 1 alpha
sp|P09428|IL1B_BOVIN K04519 IL1B; interleukin 1 beta
sp|Q9TU73|IL18_BOVIN K05482 IL18, IL1F4; interleukin 18
tr|E1BLE5|E1BLE5_BOVIN K05485 IL1F7; interleukin 1 family, member 7 (zeta)
IL-17 family
tr|E1BD45|E1BD45_BOVIN K05492 IL17D, IL27; interleukin 17D
TGF-beta family
BMP2 subfamily
sp|Q2KJH1|BMP4_BOVIN K04662 BMP4; bone morphogenetic protein 4
BMP5 subfamily
tr|E1BGS3|E1BGS3_BOVIN K04663 BMP5; bone morphogenetic protein 5
tr|G3MXA3|G3MXA3_BOVIN K16622 BMP8; bone morphogenetic protein 8
GDF5 subfamily
tr|F1MT44|F1MT44_BOVIN K04664 GDF5; growth differentiation factor 5
sp|P55106|GDF6_BOVIN K20012 GDF6; growth differentiation factor 6
tr|F6QT88|F6QT88_BOVIN K20013 GDF7; growth differentiation factor 7
Vg1 subfamily
tr|F1MKJ7|F1MKJ7_BOVIN K05495 GDF1_3; growth differentiation factor 1/3
tr|E1BEK6|E1BEK6_BOVIN K05495 GDF1_3; growth differentiation factor 1/3
BMP3 subfamily
sp|Q08DX6|GDF10_BOVIN K05496 BMP3_3B; bone morphogenetic protein 3/3B
Intermediate members
sp|O18836|GDF8_BOVIN K05497 GDF8_11; growth differentiation factor 8/11
tr|F1MXM6|F1MXM6_BOVIN K05497 GDF8_11; growth differentiation factor 8/11
sp|Q9GK68|GDF9_BOVIN K05498 GDF9_9B; growth differentiation factor 9/9B
Activin subfamily
sp|P42917|INHBB_BOVIN K04667 INHB; inhibin, beta
TGF-beta subfamily
sp|P21214|TGFB2_BOVIN K13376 TGFB2; transforming growth factor beta-2
Distant members
sp|P03972|MIS_BOVIN K04665 AMH; anti-mullerian hormone
tr|E1BEV7|E1BEV7_BOVIN K05502 BMP1, TLD; bone morphogenetic protein 1 [EC:3.4.24.19]
tr|E1BBN3|E1BBN3_BOVIN K05503 BMP9_10; bone morphogenetic protein 9/10
Chemokines
CC chemokine family
tr|E1BAG6|E1BAG6_BOVIN K05514 CCL1; C-C motif chemokine 1
tr|F1MIF0|F1MIF0_BOVIN K21083 CCL17; C-C motif chemokine 17
sp|Q8SQB1|CCL20_BOVIN K14625 CCL20; C-C motif chemokine 20
tr|F1N4S8|F1N4S8_BOVIN K16062 CCL21, SLC; C-C motif chemokine 21
tr|Q148L4|Q148L4_BOVIN K13072 CCL25; C-C motif chemokine 25
CXC chemokine family
tr|G3N095|G3N095_BOVIN K05505 CXCL1_2_3, GRO; C-X-C motif chemokine 1/2/3
tr|L8ICK9|L8ICK9_9CETA K10032 CXCL13; C-X-C motif chemokine 13

## Sheet: GTP-binding proteins (52)
GTP-binding proteins (52)
Heterotrimeric G-proteins
Alpha Subunits
Alpha type 1 (Gi/o) [OT]
tr|L8IT58|L8IT58_9CETA K04630 GNAI; guanine nucleotide-binding protein G(i) subunit alpha
tr|G3N0K2|G3N0K2_BOVIN K04535 GNAZ; guanine nucleotide-binding protein G(z) subunit alpha
Alpha type 2 (Gs)
sp|P04896-2|GNAS2_BOVIN K04632 GNAS; guanine nucleotide-binding protein G(s) subunit alpha
tr|A6QPN4|A6QPN4_BOVIN K04633 GNAL; guanine nucleotide-binding protein G(olf) subunit alpha
Alpha type 3 (Gq/11) [OT]
tr|E1BA29|E1BA29_BOVIN K04634 GNAQ; guanine nucleotide-binding protein G(q) subunit alpha
sp|P38409|GNA11_BOVIN K04635 GNA11; guanine nucleotide-binding protein subunit alpha-11
Alpha type 4 (G12/13)
tr|E1BIL1|E1BIL1_BOVIN K04346 GNA12; guanine nucleotide-binding protein subunit alpha-12
Gamma Subunits
Gamma [OT]
sp|P02698|GBG1_BOVIN K04548 GNGT1; guanine nucleotide-binding protein G(T) subunit gamma-T1
Small (Monomeric) G-proteins
Ras Family
Ras [OT]
tr|G3MXH2|G3MXH2_BOVIN K02833 HRAS; GTPase HRas
sp|P01116-2|RASK_HUMAN K07827 KRAS, KRAS2; GTPase Kras
tr|A5PKL2|A5PKL2_BOVIN K07830 RRAS2, TC21; Ras-related protein R-Ras2
tr|A5D7L6|A5D7L6_BOVIN K07831 MRAS; Ras-related protein M-Ras
Di-Ras [OT]
tr|G5E6L2|G5E6L2_BOVIN K07840 DIRAS1; DIRAS family, GTP-binding Ras-like 1
tr|F1N2Q9|F1N2Q9_BOVIN K07841 DIRAS2; DIRAS family, GTP-binding Ras-like 2
RasD
tr|F1MLL3|F1MLL3_BOVIN K07843 RASD1; RAS, dexamethasone-induced Ras-related protein 1
Rad/Gem/Kir [OT]
tr|F1MMK7|F1MMK7_BOVIN K07845 RRAD, RAD1; Ras-related associated with diabetes
tr|A4IFA1|A4IFA1_BOVIN K07846 GEM; GTP binding protein overexpressed in skeletal muscle
tr|L8IZL3|L8IZL3_9CETA K07847 REM1; Rad and Gem related GTP binding protein 1
Nki-Ras
tr|L8IBS8|L8IBS8_9CETA K17197 NKIRAS; NF-kappa-B inhibitor-interacting Ras-like protein
Others
tr|F1MM29|F1MM29_BOVIN K07852 RASL11A; Ras-like protein family member 11A
Rho Family
Rac/Cdc42 [OT]
tr|E1BLE9|E1BLE9_BOVIN K07863 RHOG; Ras homolog gene family, member G
sp|A5D7J5|RHOU_BOVIN K07865 RHOU, WRCH1; Ras homolog gene family, member U
RhoBTB
tr|A2VE09|A2VE09_BOVIN K07868 RHOBTB1_2; Rho-related BTB domain-containing protein 1/2
tr|A6QLP1|A6QLP1_BOVIN K07868 RHOBTB1_2; Rho-related BTB domain-containing protein 1/2
Others
tr|F1N7C7|F1N7C7_BOVIN K07530 RHOD; Ras homolog gene family, member D
Rab Family
Rab1/35 [OT]
tr|A5D7E0|A5D7E0_BOVIN K07876 RAB35, RAB1C; Ras-related protein Rab-35
Rab2/4/14 [OT]
tr|F1MCK4|F1MCK4_BOVIN K07880 RAB4B; Ras-related protein Rab-4B
Rab3/27 [OT]
tr|E1BNX1|E1BNX1_BOVIN K07884 RAB3D; Ras-related protein Rab-3D
Rab5/17/22/31 [OT]
sp|Q0IIG7|RAB5A_BOVIN K07887 RAB5A; Ras-related protein Rab-5A
Rab7/9 [OT]
tr|F1MJQ1|F1MJQ1_BOVIN K07897 RAB7A; Ras-related protein Rab-7A
Rab8/10/13 [OT]
sp|A4FV54|RAB8A_BOVIN K07901 RAB8A, MEL; Ras-related protein Rab-8A
sp|Q2HJI8|RAB8B_BOVIN K07902 RAB8B; Ras-related protein Rab-8B
Rab11/25 [OT]
sp|Q58DW6|RAB25_BOVIN K07906 RAB25; Ras-related protein Rab-25
Rab12/18
tr|A6QPX8|A6QPX8_BOVIN K07907 RAB12; Ras-related protein Rab-12
sp|Q0IIG8|RAB18_BOVIN K07910 RAB18; Ras-related protein Rab-18
Rab15
sp|Q1RMR4|RAB15_BOVIN K07908 RAB15; Ras-related protein Rab-15
Rab20/21/24 [OT]
tr|E1BLM1|E1BLM1_BOVIN K07911 RAB20; Ras-related protein Rab-20
sp|Q17R06|RAB21_BOVIN K07890 RAB21; Ras-related protein Rab-21
Rab26/37
sp|Q29RR0|RAB26_BOVIN K07913 RAB26; Ras-related protein Rab-26
Rab28
sp|Q3SWY9|RAB28_BOVIN K07915 RAB28; Ras-related protein Rab-28
Rab33
tr|E1BJA0|E1BJA0_BOVIN K07919 RAB33A; Ras-related protein Rab-33A
Rab34/36
tr|Q9XS71|Q9XS71_BOVIN K07921 RAB34; Ras-related protein Rab-34
Rab39/42 [OT]
sp|Q17QU4|RB39B_BOVIN K07925 RAB39B; Ras-related protein Rab-39B
Rab40
tr|A6QQY0|A6QQY0_BOVIN K07928 RAB40; Ras-related protein Rab-40
Rab45
tr|G5E5Y9|G5E5Y9_BOVIN K17199 RASEF, RAB45; Ras and EF-hand domain-containing protein
tr|G3X7C2|G3X7C2_BOVIN K17199 RASEF, RAB45; Ras and EF-hand domain-containing protein
Arf/Sar Family
Arf [OT]
sp|Q5E9I6|ARF3_BOVIN K07938 ARF3; ADP-ribosylation factor 3
sp|Q3SZF2|ARF4_BOVIN K07939 ARF4; ADP-ribosylation factor 4
tr|G3N3N1|G3N3N1_BOVIN K07941 ARF6; ADP-ribosylation factor 6
Arl2/Arl3
sp|Q2TA37|ARL2_BOVIN K07943 ARL2; ADP-ribosylation factor-like protein 2
Arl4/Arl7
sp|Q0VC18|ARL4D_BOVIN K07945 ARL4; ADP-ribosylation factor-like protein 4
Others
tr|L8IU17|L8IU17_9CETA K07958 ARL10; ADP-ribosylation factor-like protein 10
tr|F2Z4H6|F2Z4H6_BOVIN K07963 TRIM23, ARFD1; tripartite motif-containing protein 23 [EC:2.3.2.27]
Unclassified
sp|Q5E9J4-2|IFT22_BOVIN K07935 IFT22, RABL5; intraflagellar transport protein 22

## Sheet: Ion channels (165)
Ion channels (165)
Cys-loop superfamily
GABA-A
sp|P20237|GBRA4_BOVIN K05175 GABRA; gamma-aminobutyric acid receptor subunit alpha
sp|P10063|GBRA2_BOVIN K05175 GABRA; gamma-aminobutyric acid receptor subunit alpha
sp|P10064|GBRA3_BOVIN K05175 GABRA; gamma-aminobutyric acid receptor subunit alpha
sp|P0C2W5|GBRB2_BOVIN K05181 GABRB; gamma-aminobutyric acid receptor subunit beta
tr|A6QQP6|A6QQP6_BOVIN K05186 GABRG; gamma-aminobutyric acid receptor subunit gamma
sp|Q5EA06|GBRP_BOVIN K05189 GABRP; gamma-aminobutyric acid receptor subunit pi
tr|G5E635|G5E635_BOVIN K05190 GABRR; gamma-aminobutyric acid receptor subunit rho
Glycine
tr|G5E5K0|G5E5K0_BOVIN K05194 GLRA2; glycine receptor alpha-2
Acetylcholine (nicotinic)
tr|F1N4T3|F1N4T3_BOVIN K04804 CHRNA2; nicotinic acetylcholine receptor alpha-2
tr|E1BHK0|E1BHK0_BOVIN K04806 CHRNA4; nicotinic acetylcholine receptor alpha-4
tr|G3N1V0|G3N1V0_BOVIN K04807 CHRNA5; nicotinic acetylcholine receptor alpha-5
tr|F1MDD1|F1MDD1_BOVIN K04810 CHRNA9; nicotinic acetylcholine receptor alpha-9
sp|P04758|ACHB_BOVIN K04812 CHRNB1; nicotinic acetylcholine receptor beta-1
tr|F1MUN1|F1MUN1_BOVIN K04813 CHRNB2; nicotinic acetylcholine receptor beta-2
tr|F1MC93|F1MC93_BOVIN K04815 CHRNB4; nicotinic acetylcholine receptor beta-4
sp|P02715|ACHE_BOVIN K04817 CHRNE; nicotinic acetylcholine receptor epsilon
Serotonin (5-HT3)
tr|G5E5J6|G5E5J6_BOVIN K04819 HTR3; 5-hydroxytryptamine receptor 3
Glutamate-gated cation channels
Glutamate (ionotropic), non-NMDA
tr|G0T3G6|G0T3G6_BOVIN K05197 GRIA1; glutamate receptor 1
tr|F1N3G8|F1N3G8_BOVIN K05197 GRIA1; glutamate receptor 1
tr|F1MBY1|F1MBY1_BOVIN K05198 GRIA2; glutamate receptor 2
tr|F1N246|F1N246_BOVIN K05201 GRIK1; glutamate receptor, ionotropic kainate 1
tr|F1MG21|F1MG21_BOVIN K05202 GRIK2; glutamate receptor, ionotropic kainate 2
tr|F1MCM2|F1MCM2_BOVIN K05203 GRIK3; glutamate receptor, ionotropic kainate 3
tr|F1MCW8|F1MCW8_BOVIN K05204 GRIK4; glutamate receptor, ionotropic kainate 4
tr|E1BKL6|E1BKL6_BOVIN K05205 GRIK5; glutamate receptor, ionotropic kainate 5
tr|G3MZJ2|G3MZJ2_BOVIN K05207 GRID2; glutamate receptor delta-2 subunit
Glutamate (ionotropic), NMDA
tr|G3N3K3|G3N3K3_BOVIN K05208 GRIN1; glutamate receptor ionotropic, NMDA 1
tr|F1MCL3|F1MCL3_BOVIN K05210 GRIN2B; glutamate receptor ionotropic, NMDA 2B
tr|F1MP46|F1MP46_BOVIN K05211 GRIN2C; glutamate receptor ionotropic, NMDA 2C
tr|F1MR40|F1MR40_BOVIN K05212 GRIN2D; glutamate receptor ionotropic, NMDA 2D
tr|F1MWI8|F1MWI8_BOVIN K05214 GRIN3B; glutamate receptor ionotropic, NMDA 3B
Epithelial and related channels
Epithelial sodium channel (SCNN)
sp|P55270|SCNNA_BOVIN K04824 SCNN1A; amiloride-sensitive sodium channel subunit alpha
sp|A5D7U4|SCNNB_BOVIN K04825 SCNN1B; amiloride-sensitive sodium channel subunit beta
tr|F1MY57|F1MY57_BOVIN K04826 SCNN1D; amiloride-sensitive sodium channel subunit delta
sp|F1MJW3|SCNNG_BOVIN K04827 SCNN1G; amiloride-sensitive sodium channel subunit gamma
Acid-sensing ion channel (ASIC)
tr|E1BPU5|E1BPU5_BOVIN K04830 ASIC3, ACCN3; acid-sensing ion channel 3
tr|E1BMN1|E1BMN1_BOVIN K04831 ASIC4, ACCN4, BNAC4; acid-sensing ion channel 4
tr|F1MGK7|F1MGK7_BOVIN K04832 ASIC5, ACCN5; acid-sensing ion channel 5
ATP-gated cation channel (P2X)
tr|E1BIH1|E1BIH1_BOVIN K05216 P2RX2; P2X purinoceptor 2
sp|Q5E9U1|P2RX4_BOVIN K05218 P2RX4; P2X purinoceptor 4
tr|F1MUF3|F1MUF3_BOVIN K05219 P2RX5; P2X purinoceptor 5
tr|F1MVZ6|F1MVZ6_BOVIN K05220 P2RX7; P2X purinoceptor 7
Ryanodine and IP3 receptors
Ryanodine receptor (RYR)
tr|E1BDQ4|E1BDQ4_BOVIN K04961 RYR1; ryanodine receptor 1
tr|E1BE29|E1BE29_BOVIN K04962 RYR2; ryanodine receptor 2
tr|F1MHA5|F1MHA5_BOVIN K04963 RYR3; ryanodine receptor 3
IP3 receptor
tr|F1MX21|F1MX21_BOVIN K04958 ITPR1; inositol 1,4,5-triphosphate receptor type 1
sp|Q8WN96|ITPR2_BOVIN K04959 ITPR2; inositol 1,4,5-triphosphate receptor type 2
sp|Q8WN95|ITPR3_BOVIN K04960 ITPR3; inositol 1,4,5-triphosphate receptor type 3
Voltage-gated cation channels
Na+ channel, SCN alpha, NaV1.x
tr|M0QW12|M0QW12_BOVIN K04833 SCN1A; voltage-gated sodium channel type I alpha
tr|E1BMH1|E1BMH1_BOVIN K04834 SCN2A; voltage-gated sodium channel type II alpha
tr|E1B9G2|E1B9G2_BOVIN K04836 SCN3A; voltage-gated sodium channel type III alpha
tr|F1N4W9|F1N4W9_BOVIN K04839 SCN7A, SCN6A; voltage-gated sodium channel type VII alpha
tr|M0QVY7|M0QVY7_BOVIN K04841 SCN9A; voltage-gated sodium channel type IX alpha
tr|G3MYM1|G3MYM1_BOVIN K04842 SCN10A; voltage-gated sodium channel type X alpha
Na+ channel, SCN beta
sp|Q08E08|SCN4B_BOVIN K04848 SCN4B; voltage-gated sodium channel type IV beta
Ca2+ channel, CACN alpha-1, CaVx.x
tr|F1N1E0|F1N1E0_BOVIN K04344 CACNA1A; voltage-dependent calcium channel P/Q type alpha-1A
tr|A8Y829|A8Y829_BOVIN K04344 CACNA1A; voltage-dependent calcium channel P/Q type alpha-1A
tr|G3X7Z2|G3X7Z2_BOVIN K04849 CACNA1B; voltage-dependent calcium channel N type alpha-1B
tr|F1N5T3|F1N5T3_BOVIN K04850 CACNA1C; voltage-dependent calcium channel L type alpha-1C
tr|F1MTK5|F1MTK5_BOVIN K04851 CACNA1D; voltage-dependent calcium channel L type alpha-1D
tr|F1MP22|F1MP22_BOVIN K04852 CACNA1E; voltage-dependent calcium channel R type alpha-1E
tr|F1MR37|F1MR37_BOVIN K04854 CACNA1G; voltage-dependent calcium channel T type alpha-1G
tr|F1MQV2|F1MQV2_BOVIN K04855 CACNA1H; voltage-dependent calcium channel T type alpha-1H
tr|G3N034|G3N034_BOVIN K04856 CACNA1I; voltage-dependent calcium channel T type alpha-1I
Ca2+ channel, CACN alpha-2 delta
tr|F1N7F9|F1N7F9_BOVIN K04858 CACNA2D1; voltage-dependent calcium channel alpha-2/delta-1
tr|F1MME4|F1MME4_BOVIN K04860 CACNA2D3; voltage-dependent calcium channel alpha-2/delta-3
tr|F1MHZ1|F1MHZ1_BOVIN K04861 CACNA2D4; voltage-dependent calcium channel alpha-2/delta-4
Ca2+ channel, CACN beta
sp|Q9MZL5|CACB2_BOVIN K04863 CACNB2; voltage-dependent calcium channel beta-2
sp|Q9MZL3|CACB3_BOVIN K04864 CACNB3; voltage-dependent calcium channel beta-3
Ca2+ channel, CACN gamma
sp|Q08DE1|CCG1_BOVIN K04866 CACNG1; voltage-dependent calcium channel gamma-1
tr|Q9GLH2|Q9GLH2_BOVIN K04867 CACNG2; voltage-dependent calcium channel gamma-2
sp|Q0VD05|CCG3_BOVIN K04868 CACNG3; voltage-dependent calcium channel gamma-3
tr|F1MV40|F1MV40_BOVIN K04873 CACNG8; voltage-dependent calcium channel gamma-8
K+ channel, KCNA, Kv1.x (Shaker)
tr|F1MLD6|F1MLD6_BOVIN K04874 KCNA1; potassium voltage-gated channel Shaker-related subfamily A member 1
sp|Q05037|KCNA4_BOVIN K04877 KCNA4; potassium voltage-gated channel Shaker-related subfamily A member 4
tr|Q9TS07|Q9TS07_BOVIN K04878 KCNA5; potassium voltage-gated channel Shaker-related subfamily A member 5
tr|E1B9N0|E1B9N0_BOVIN K04880 KCNA7; potassium voltage-gated channel Shaker-related subfamily A member 7
sp|Q4PJK1|KCAB1_BOVIN K04882 KCNAB1; potassium voltage-gated channel Shaker-related subfamily A, beta member 1
tr|A2VDT0|A2VDT0_BOVIN K04884 KCNAB3; potassium voltage-gated channel Shaker-related subfamily A, beta member 3
K+ channel, KCNB, Kv2.x (Shab)
tr|E1BDC5|E1BDC5_BOVIN K04885 KCNB1; potassium voltage-gated channel Shab-related subfamily B member 1
sp|Q4ZHA6|KCNB2_BOVIN K04886 KCNB2; potassium voltage-gated channel Shab-related subfamily B member 2
K+ channel, KCND, Kv4.x (Shal)
sp|Q52PG9|KCND1_BOVIN K04891 KCND1; potassium voltage-gated channel Shal-related subfamily D member 1
tr|F1MVI5|F1MVI5_BOVIN K04892 KCND2; potassium voltage-gated channel Shal-related subfamily D member 2
tr|F1MY95|F1MY95_BOVIN K04893 KCND3; potassium voltage-gated channel Shal-related subfamily D member 3
K+ channel, KCNF, Kv5.x
tr|A4FV89|A4FV89_BOVIN K04899 KCNF1; potassium voltage-gated channel subfamily F member 1
K+ channel, KCNG, Kv6.x
tr|E1BCM0|E1BCM0_BOVIN K04900 KCNG1; potassium voltage-gated channel subfamily G member 1
tr|F1MJA9|F1MJA9_BOVIN K04901 KCNG2; potassium voltage-gated channel subfamily G member 2
tr|F1ML52|F1ML52_BOVIN K04903 KCNG4; potassium voltage-gated channel subfamily G member 4
K+ channel, KCNH, Kv10-12.x (Ether-a-go-go)
tr|E1BF56|E1BF56_BOVIN K04904 KCNH1; potassium voltage-gated channel Eag-related subfamily H member 1
tr|F1MCI9|F1MCI9_BOVIN K04905 KCNH2; potassium voltage-gated channel Eag-related subfamily H member 2
tr|E1B760|E1B760_BOVIN K04906 KCNH3; potassium voltage-gated channel Eag-related subfamily H member 3
tr|E1BLH0|E1BLH0_BOVIN K04907 KCNH4; potassium voltage-gated channel Eag-related subfamily H member 4
tr|F1MP51|F1MP51_BOVIN K04908 KCNH5; potassium voltage-gated channel Eag-related subfamily H member 5
tr|E1BMA2|E1BMA2_BOVIN K04909 KCNH6; potassium voltage-gated channel Eag-related subfamily H member 6
tr|F1N4A4|F1N4A4_BOVIN K04910 KCNH7; potassium voltage-gated channel Eag-related subfamily H member 7
tr|F1MDM5|F1MDM5_BOVIN K04911 KCNH8; potassium voltage-gated channel Eag-related subfamily H member 8
K+ channel, KCNK, K2px.x
tr|G3N1Q6|G3N1Q6_BOVIN K04922 KCNK13; potassium channel subfamily K member 13
tr|E1BEH3|E1BEH3_BOVIN K04923 KCNK15; potassium channel subfamily K member 15
tr|Q8HZT2|Q8HZT2_BOVIN K04925 KCNK17; potassium channel subfamily K member 17
tr|F1MW24|F1MW24_BOVIN K20007 KCNK18; potassium channel subfamily K member 18
K+ channel, KCNQ, Kv7.x (KQT-like)
sp|P58126|KCNQ3_BOVIN K04928 KCNQ3; potassium voltage-gated channel KQT-like subfamily member 3
tr|F1MPK2|F1MPK2_BOVIN K04930 KCNQ5; potassium voltage-gated channel KQT-like subfamily member 5
K+ channel, KCNS, Kv9.x (Delayed-rectifier)
tr|E1BKI8|E1BKI8_BOVIN K04931 KCNS1; potassium voltage-gated channel delayed-rectifier subfamily S member 1
tr|F1MPV7|F1MPV7_BOVIN K04932 KCNS2; potassium voltage-gated channel delayed-rectifier subfamily S member 2
K+ channel, KCNM, KCa1.x
sp|Q28204-2|KCMA1_BOVIN K04936 KCNMA1; potassium large conductance calcium-activated channel subfamily M alpha member 1
tr|C6KH61|C6KH61_BOVIN K05274 KCNMA3, KCNU1; potassium large conductance calcium-activated channel subfamily M alpha member 3
K+ channel, KCNN, KCa2-3.x (Small conductance)
tr|E1BGY2|E1BGY2_BOVIN K04942 KCNN1; potassium intermediate/small conductance calcium-activated channel subfamily N member 1
tr|E1BHB0|E1BHB0_BOVIN K04944 KCNN3; potassium intermediate/small conductance calcium-activated channel subfamily N member 3
K+ channel, KCNT, KCa4.x
tr|F1MUE0|F1MUE0_BOVIN K04946 KCNT1; potassium channel subfamily T member 1
tr|F1N4T0|F1N4T0_BOVIN K04947 KCNT2; potassium channel subfamily T member 2
Related to voltage-gated cation channels
Inward rectifier channel (Kir)
tr|F1MBH5|F1MBH5_BOVIN K04995 KCNJ1; potassium inwardly-rectifying channel subfamily J member 1
sp|E1BNE9|KCNJ3_BOVIN K04997 KCNJ3; potassium inwardly-rectifying channel subfamily J member 3
tr|M0QSH3|M0QSH3_9CETA K05001 KCNJ8; potassium inwardly-rectifying channel subfamily J member 8
tr|E1BNF2|E1BNF2_BOVIN K05002 KCNJ9; potassium inwardly-rectifying channel subfamily J member 9
sp|Q4TZY1|KCJ12_BOVIN K05005 KCNJ12; potassium inwardly-rectifying channel subfamily J member 12
tr|A5PJL2|A5PJL2_BOVIN K05008 KCNJ15; potassium inwardly-rectifying channel subfamily J member 15
Cyclic nucleotide-gated channel (CNG)
sp|Q03041|CNGA2_BOVIN K04949 CNGA2; cyclic nucleotide gated channel alpha 2
sp|Q29441|CNGA3_BOVIN K04950 CNGA3; cyclic nucleotide gated channel alpha 3
tr|F1MM42|F1MM42_BOVIN K04951 CNGA4; cyclic nucleotide gated channel alpha 4
sp|Q28181|CNGB1_BOVIN K04952 CNGB1; cyclic nucleotide gated channel beta 1
Brain cyclic nucleotide-gated channel (HCN)
tr|E1BM97|E1BM97_BOVIN K04954 HCN1; hyperpolarization activated cyclic nucleotide-gated potassium channel 1
tr|F1MW86|F1MW86_BOVIN K04955 HCN2; hyperpolarization activated cyclic nucleotide-gated potassium channel 2
tr|E1BL87|E1BL87_BOVIN K04956 HCN3; hyperpolarization activated cyclic nucleotide-gated potassium channel 3
tr|E1BIS4|E1BIS4_BOVIN K04957 HCN4; hyperpolarization activated cyclic nucleotide-gated potassium channel 4
Transient receptor potential family, TRPC (Classical)
sp|O18784-2|TRPC1_BOVIN K04964 TRPC1; transient receptor potential cation channel subfamily C member 1
tr|E1BMQ7|E1BMQ7_BOVIN K04965 TRPC2; transient receptor potential cation channel subfamily C member 2
tr|A7VJS4|A7VJS4_BOVIN K04966 TRPC3; transient receptor potential cation channel subfamily C member 3
sp|P79100|TRPC4_BOVIN K04967 TRPC4; transient receptor potential cation channel subfamily C member 4
tr|F1N3B2|F1N3B2_BOVIN K04970 TRPC7; transient receptor potential cation channel subfamily C member 7
Transient receptor potential family, TRPV (Vanilloid)
tr|E1BGM0|E1BGM0_BOVIN K05222 TRPV1; transient receptor potential cation channel subfamily V member 1
tr|Q5EA32|Q5EA32_BOVIN K04971 TRPV2; transient receptor potential cation channel subfamily V member 2
tr|E1BNI9|E1BNI9_BOVIN K04972 TRPV3; transient receptor potential cation channel subfamily V member 3
tr|E1BCP0|E1BCP0_BOVIN K04973 TRPV4; transient receptor potential cation channel subfamily V member 4
tr|E1B6Y9|E1B6Y9_BOVIN K04974 TRPV5; transient receptor potential cation channel subfamily V member 5
tr|E1BAN3|E1BAN3_BOVIN K04975 TRPV6; transient receptor potential cation channel subfamily V member 6
Transient receptor potential family, TRPM (Melastatin/Long TRP)
tr|F1MPU3|F1MPU3_BOVIN K04976 TRPM1; transient receptor potential cation channel subfamily M member 1
tr|E1BFK7|E1BFK7_BOVIN K04977 TRPM2; transient receptor potential cation channel subfamily M member 2 [EC:3.6.1.13]
tr|F1MQI6|F1MQI6_BOVIN K04978 TRPM3; transient receptor potential cation channel subfamily M member 3
tr|E1BNX9|E1BNX9_BOVIN K04979 TRPM4; transient receptor potential cation channel subfamily M member 4
tr|F1MWK1|F1MWK1_BOVIN K04981 TRPM6, CHAK2; transient receptor potential cation channel subfamily M member 6 [EC:2.7.11.1]
tr|F1MPF0|F1MPF0_BOVIN K04982 TRPM7, CHAK1; transient receptor potential cation channel subfamily M member 7 [EC:2.7.11.1]
tr|E1BPC8|E1BPC8_BOVIN K04983 TRPM8; transient receptor potential cation channel subfamily M member 8
Transient receptor potential family, TRPA (ANKTM1)
tr|G5E522|G5E522_BOVIN K04984 TRPA1, ANKTM1; transient receptor potential cation channel subfamily A member 1
Transient receptor potential family, TRPP (Polycystin)
tr|E1BC86|E1BC86_BOVIN K04985 PKD1; polycystin 1
tr|F1MLH0|F1MLH0_BOVIN K04988 PKD1L2; polycystin 1L2
tr|F1N3D1|F1N3D1_BOVIN K04989 PKD1L3; polycystin 1L3
sp|Q4GZT3|PKD2_BOVIN K04986 PKD2; polycystin 2
tr|F1N5R3|F1N5R3_BOVIN K04990 PKD2L1; polycystin 2L1
Transient receptor potential family, TRPML (Mucolipin)
tr|G3N2S2|G3N2S2_BOVIN K04993 MCOLN2; mucolipin 2
CatSper and two-pore channel
tr|F1MLI0|F1MLI0_BOVIN K16892 CATSPER4; cation channel sperm-associated protein 4
tr|E1B9V5|E1B9V5_BOVIN K16893 CATSPERB; cation channel sperm-associated protein subunit beta
sp|E1B9E5|CTSRD_BOVIN K16895 CATSPERD; cation channel sperm-associated protein subunit delta
tr|F1MSJ0|F1MSJ0_BOVIN K16896 TPCN1; two pore calcium channel protein 1
Sodium leak channel, non-selective
tr|E1BK43|E1BK43_BOVIN K21863 NALCN; sodium leak channel non-selective protein
Chloride channels
CLCN chloride channel
tr|E1BLQ0|E1BLQ0_BOVIN K05010 CLCN1; chloride channel 1, skeletal muscle
tr|F1N0K8|F1N0K8_BOVIN K05011 CLCN2; chloride channel 2
tr|E1BK15|E1BK15_BOVIN K05015 CLCN6; chloride channel 6
sp|Q4PKH3|CLCN7_BOVIN K05016 CLCN7; chloride channel 7
Chloride intracellular channel
tr|A2VE46|A2VE46_BOVIN K05022 CLIC2; chloride intracellular channel protein 2
tr|E1BAI4|E1BAI4_BOVIN K05026 CLIC6; chloride intracellular channel protein 6
Calcium activated chloride channel
tr|F1MGZ5|F1MGZ5_BOVIN K05027 CLCA1; calcium-activated chloride channel regulator 1
tr|F1MY38|F1MY38_BOVIN K05030 CLCA3_4; calcium-activated chloride channel regulator 3/4
sp|P54281|CLCA1_BOVIN K05030 CLCA3_4; calcium-activated chloride channel regulator 3/4
tr|E1BGK6|E1BGK6_BOVIN K19496 ANO1, DOG1, TMEM16A; anoctamin-1
tr|F1N0S4|F1N0S4_BOVIN K19497 ANO2, TMEM16B; anoctamin-2
tr|F1MHG6|F1MHG6_BOVIN K19498 ANO3, TMEM16C; anoctamin-3
sp|A6QLE6|ANO4_BOVIN K19499 ANO4, TMEM16D; anoctamin-4
tr|F1MPC2|F1MPC2_BOVIN K19480 ANO5, GDD1, TMEM16E; anoctamin-5
tr|E1BJF8|E1BJF8_BOVIN K19502 ANO8, TMEM16H; anoctamin-8
tr|A7MBF4|A7MBF4_BOVIN K19327 ANO10, TMEM16K; anoctamin-10

## Sheet: Nuclear receptors (23)
Nuclear receptors (23)
1. Thyroid hormone like
1A. Thyroid hormone receptor (THR)
tr|L8IF00|L8IF00_9CETA K05547 THRA, NR1A1; thyroid hormone receptor alpha
1C. Peroxisome proliferator-activated receptor (PPAR)
tr|L8IHD8|L8IHD8_9CETA K07294 NR1C1, PPARA; peroxisome proliferator-activated receptor alpha
1D. Rev-Erb
tr|F1MWI2|F1MWI2_BOVIN K08531 NR1D2; nuclear receptor subfamily 1 group D member 2
1F. RAR-related orphan receptor
tr|F1MWS0|F1MWS0_BOVIN K08533 NR1F2, RORB; RAR-related orphan receptor beta
tr|A3QU33|A3QU33_BOVIN K08534 NR1F3, RORC; RAR-related orphan receptor gamma
1H. Liver X receptor like receptor
sp|Q5E9B6|NR1H3_BOVIN K08536 NR1H3, LXRA; liver X receptor alpha
sp|Q3SZL0|NR1H4_BOVIN K08537 NR1H4, FXR; farnesoid X receptor
1I. Vitamin D3 like receptor
tr|A2VDU4|A2VDU4_BOVIN K08540 NR1I2, PXR; pregnane X receptor
tr|Q2KIF4|Q2KIF4_BOVIN K08541 NR1I3, CAR; constitutive androstane receptor
2. Hepatocyte nuclear factor 4 like
2A. Hepatocyte nuclear factor 4 receptor
tr|F1MGG2|F1MGG2_BOVIN K08037 NR2A2, HNF4G; hepatocyte nuclear factor 4-gamma
2B. Retinoid X receptor (RXR)
tr|F1MX52|F1MX52_BOVIN K08524 RXRA, NR2B1; retinoid X receptor alpha
2C. Testicular receptor
sp|A0JNE3|NR2C1_BOVIN K08543 NR2C1, TR2; testicular receptor 2
tr|E1B9Y6|E1B9Y6_BOVIN K08544 NR2C2, TR4; testicular receptor 4
2E. Tailless like receptor
tr|F1MN68|F1MN68_BOVIN K08545 NR2E1, TLX, tll; nuclear receptor subfamily 2 group E member 1
3. Estrogen like
3A. Estrogen receptor
sp|P49884|ESR1_BOVIN K08550 ESR1, NR3A1; estrogen receptor alpha
sp|Q9XSB5|ESR2_BOVIN K08551 ESR2, NR3A2; estrogen receptor beta
3B. Estrogen-related receptor
tr|F1MBX3|F1MBX3_BOVIN K08552 NR3B1, ESRRA; estrogen-related receptor alpha
tr|Q2T9T6|Q2T9T6_BOVIN K08553 NR3B2, ESRRB; estrogen-related receptor beta
3C. 3-Ketosteroid receptor
tr|F1MN19|F1MN19_BOVIN K05771 NR3C1, GR; glucocorticoid receptor
tr|Q865Y6|Q865Y6_BOVIN K05771 NR3C1, GR; glucocorticoid receptor
tr|F1MKV9|F1MKV9_BOVIN K08555 NR3C2, MR; mineralocorticoid receptor
tr|Q690N0|Q690N0_BOVIN K08556 PGR, NR3C3; progesterone receptor
tr|F1N2B6|F1N2B6_BOVIN K08557 AR, NR3C4; androgen receptor
4. Nerve growth factor IB like
4A. Nerve growth factor IB like receptor
sp|Q0V8F0|NR4A1_BOVIN K04465 NR4A1, HMR; nuclear receptor subfamily 4 group A member 1

[truncated: 32 more sheets: Cytokine receptors (60), Enzyme-linked receptors (34), G protein-coupled , Exosome (321), Cytoskeleton proteins (202), Secretion system (10), Transporters (217), Mitochondrial biogenesis, DNA repair and recombination, Chromosome, DNA replication proteins, Proteasome, Ubiquitin system, Membrane trafficking, Chaperones & folding catalysts, Translation factors, Transfer RNA biogenesis, Ribosome biogenesis, Ribosome, Spliceosome …]
