# Supplementary material for: Transcriptional Repression of MFG-E8 Causes Disturbance in the Homeostasis of Cell Cycle Through DOCK/ZP4/STAT Signaling in Buffalo Mammary Epithelial Cells
Source: Front Cell Dev Biol. 2021 Apr 1;9:568660. doi: 10.3389/fcell.2021.568660 (PMC8047144; doi:10.3389/fcell.2021.568660)
Supplement: Supplementary Table 5 — Information from the ngLOC prediction of proteins classified in to different categories of cellular organelles. [file Table_5.XLSX]

## Sheet: all nor used for vol plot
Uniprot ID (all nor used for vol plot)	Sequence_ID	Prediction	Pred1	Prob1	Pred2	Prob2	Pred3	Prob3	MLCS
A0JN52	SP|A0JN52|SF3B3_BOVIN	NUC	NUC	49.71	CYT	7.091	PLA	6.278	32.59
A0JN54	SP|A0JN54|DGKA_BOVIN	CYT	CYT	22.32	PLA	20.62	NUC	11.04	42.21
A0JN62-2	SP|A0JN62-2|CE120_BOVIN	CSK	CSK	32.62	NUC	12.25	CYT	10.68	35.72
A0JN86	SP|A0JN86|PCGF5_BOVIN	NUC	NUC	17.78	CYT	10.76	CSK	10.09	26.53
A0JN95	SP|A0JN95|MET15_BOVIN	CYT	CYT	13.1	NUC	12.25	EXC	11	25.14
A0JNB0	SP|A0JNB0|FYN_BOVIN	PLA	PLA	46.18	CYT	16.64	MIT	12.4	44.26
A0JND3	SP|A0JND3|EOGT_BOVIN	NUC	NUC	12.28	CYT	10.46	PLA	9.681	22.33
A0JND4	SP|A0JND4|SBNO2_BOVIN	NUC	NUC	21.18	CYT	13.34	PLA	11.54	31.82
A0JNE3	SP|A0JNE3|NR2C1_BOVIN	NUC	NUC	47.5	CYT	12.42	PLA	5.746	38.9
A0JNI5	SP|A0JNI5|CLASR_BOVIN	NUC	NUC	35.87	CYT	14.28	PLA	11.72	39.32
A1A4I9	SP|A1A4I9|UFL1_BOVIN	CYT	CYT	29.43	END	26.31	NUC	10.26	53.99
A1A4J7-2	SP|A1A4J7-2|SMG8_BOVIN	NUC	NUC	15.46	CYT	14.14	PLA	13.13	29.2
A1A4K3	SP|A1A4K3|DDB1_BOVIN	NUC/CYT	NUC	38.19	CYT	38.16	PLA	3.506	76.32
A1A4L0	SP|A1A4L0|SNX4_BOVIN	NUC	NUC	14.13	CYT	12.1	PLA	10.64	25.7
A2VDN5	SP|A2VDN5|SPAST_BOVIN	NUC	NUC	19.92	CYT	17.46	PLA	9.869	36.47
A2VDP6	SP|A2VDP6|NXPE3_BOVIN	CYT	CYT	11.86	EXC	11.31	NUC	9.95	23.05
A2VDR9	SP|A2VDR9|ZN750_BOVIN	NUC	NUC	18.99	CYT	12.4	PLA	11.09	29.32
A2VDS0	SP|A2VDS0|KPRB_BOVIN	NUC	NUC	15.53	CYT	15.37	PLA	11.62	30.85
A2VDY4	SP|A2VDY4|HPF1_BOVIN	CYT	CYT	14.7	NUC	14.53	PLA	10.48	29.19
A2VDZ4	SP|A2VDZ4|PLK4_BOVIN	NUC	NUC	27.46	CSK	24.36	CYT	9.324	50.22
A2VE39	SP|A2VE39|CMTR1_BOVIN	NUC	NUC	43.11	CYT	7.834	PLA	7.213	32.97
A2VE53	SP|A2VE53|IKIP_BOVIN	END	END	27.02	NUC	12.85	CYT	11.72	34.22
A3FPG8	SP|A3FPG8|GPAT4_BOVIN	END	END	49.56	PLA	8.995	CYT	5.959	34.8
A3KMV1	SP|A3KMV1|SHKB1_BOVIN	NUC	NUC	16.29	CYT	14.96	PLA	14.27	30.84
A3KMV5	SP|A3KMV5|UBA1_BOVIN	NUC	NUC	19.73	CYT	17.29	EXC	8.77	36.12
A3KMV8	SP|A3KMV8|RBP10_BOVIN	NUC	NUC	22.5	CYT	20.84	EXC	9.593	42.63
A3KMW7	SP|A3KMW7|MAP10_BOVIN	NUC	NUC	18.13	CYT	13.65	PLA	11.15	30.35
A3KMX8	SP|A3KMX8|ARMT1_BOVIN	NUC	NUC	13.68	CYT	13.32	PLA	12.06	26.91
A3KMY4	SP|A3KMY4|CTL4_BOVIN	PLA	PLA	22.12	NUC	10.41	EXC	9.604	28.71
A4FUD3	SP|A4FUD3|U5S1_BOVIN	NUC	NUC	57.28	CYT	9.26	PLA	4.56	34.59
A4FUF0-2	SP|A4FUF0-2|GLYR1_BOVIN	NUC	NUC	50.4	CYT	9.191	CSK	5.532	35.03
A4FUZ5	SP|A4FUZ5|SERC3_BOVIN	PLA	PLA	22.99	GOL	16.53	END	12.37	36.97
A4FV61	SP|A4FV61|ZN512_BOVIN	NUC	NUC	15.49	CYT	15.11	PLA	9.775	30.48
A4FV84	SP|A4FV84|MRT4_BOVIN	NUC	NUC	47.08	CYT	8.982	EXC	6.219	34.7
A4IF62	SP|A4IF62|RPC1_BOVIN	NUC	NUC	50.2	CYT	7.105	EXC	5.405	32.61
A4IF63	SP|A4IF63|TRIM2_BOVIN	CYT	CYT	48.62	NUC	8.501	MIT	5.678	34.2
A4IF87	SP|A4IF87|GNPAT_BOVIN	PLA	PLA	14.55	NUC	13.1	CYT	11.34	27.25
A4IF89	SP|A4IF89|EXOC8_BOVIN	NUC	NUC	17.3	CYT	14.31	PLA	12.1	30.67
A4IFA3	SP|A4IFA3|GT2D2_BOVIN	NUC	NUC	59.43	CYT	8.761	PLA	4.649	33.64
A4IFA7	SP|A4IFA7|CBR4_BOVIN	MIT	MIT	30.24	CYT	11.35	NUC	10.98	33.73
A4IFD8	SP|A4IFD8|MET14_BOVIN	NUC	NUC	20.29	CYT	18.06	CSK	8.223	37.49
A4IFJ5	SP|A4IFJ5|PA24A_BOVIN	CYT	CYT	52.77	PLA	7.389	NUC	7.048	32.86
A4IFQ0-2	SP|A4IFQ0-2|THOC5_BOVIN	NUC/CYT	NUC	32.55	CYT	31.38	EXC	4.898	63.18
A5D794	SP|A5D794|GAPD1_BOVIN	PLA	PLA	42.7	NUC	10.18	CYT	9.093	35.68
A5D7B7	SP|A5D7B7|SEPR_BOVIN	PLA	PLA	41.71	EXC	11.77	NUC	5.88	37.47
A5D7F5	SP|A5D7F5|DJC27_BOVIN	EXC	EXC	11.25	END	10.55	CYT	10.28	21.65
A5D7H3	SP|A5D7H3|CTL2_BOVIN	PLA	PLA	39.74	NUC	8.273	CYT	6.87	32.91
A5D7I0	SP|A5D7I0|T10IP_BOVIN	NUC	NUC	18.25	CYT	14.33	PLA	13.03	31.31
A5D7J5	SP|A5D7J5|RHOU_BOVIN	PLA	PLA	32.14	GOL	26.65	CYT	9.153	55.56
A5D7K8	SP|A5D7K8|PD2R_BOVIN	PLA	PLA	21.94	NUC	12.32	CYT	11.45	30.97
A5D7L8	SP|A5D7L8|PERM1_BOVIN	NUC	NUC	19.22	CYT	14.25	PLA	12.98	31.81
A5D7M3	SP|A5D7M3|GAS8_BOVIN	CYT	CYT	15.79	NUC	15.64	PLA	11.63	31.38
A5D7N9	SP|A5D7N9|MS18A_BOVIN	NUC	NUC	30.51	PLA	13.13	CYT	11.86	36.05
A5D7R8	SP|A5D7R8|KITH_BOVIN	CYT	CYT	55.61	NUC	6.834	MIT	6.005	31.99
A5D7U4	SP|A5D7U4|SCNNB_BOVIN	PLA	PLA	35.71	NUC	9.943	CYT	8.032	33.89
A5D7V9	SP|A5D7V9|SYHM_BOVIN	CYT	CYT	33.55	NUC	10.23	MIT	9.85	33.57
A5D9D4	SP|A5D9D4|MSTO1_BOVIN	MIT	MIT	28.74	NUC	12	CYT	11.02	33.93
A5PJS6	SP|A5PJS6|UBP10_BOVIN	NUC	NUC	30.12	CYT	28.71	PLA	6.155	57.99
A5PJX7	SP|A5PJX7|S6A13_BOVIN	PLA	PLA	65.28	EXC	5.148	CYT	4.867	28.08
A5PJZ1	SP|A5PJZ1|SCMC1_BOVIN	MIT	MIT	47.43	CYT	7.188	PLA	7.025	32.64
A5PJZ5	SP|A5PJZ5|NUP93_BOVIN	NUC	NUC	45.38	PLA	8.204	CYT	8.043	33.66
A5PK23	SP|A5PK23|MED26_BOVIN	NUC	NUC	20.89	CYT	14.17	PLA	12.87	32.7
A5PK45	SP|A5PK45|GT251_BOVIN	END	END	38.61	PLA	8.881	EXC	8.412	33.37
A5PKF5	SP|A5PKF5|THA11_BOVIN	NUC	NUC	25.1	CYT	22.44	PLA	10.39	46.28
A6H750	SP|A6H750|KIF2B_BOVIN	CSK	CSK	25.77	NUC	17.57	CYT	12.41	39.79
A6H754-2	SP|A6H754-2|CD37L_BOVIN	CYT	CYT	44	NUC	11.02	CSK	7.574	36.87
A6H759	SP|A6H759|LRC72_BOVIN	CSK	CSK	12.65	NUC	12.29	CYT	11.81	24.85
A6H768	SP|A6H768|GALK1_BOVIN	NUC	NUC	16.53	CYT	14.29	PLA	14.2	30.13
A6H773	SP|A6H773|TMM70_BOVIN	MIT	MIT	21.26	PLA	14.36	NUC	11.67	33.16
A6H789	SP|A6H789|LRC3B_BOVIN	CYT	CYT	14.43	PLA	13.57	EXC	12.76	27.76
A6H7B5	SP|A6H7B5|CSN3_BOVIN	NUC/CYT	NUC	34.61	CYT	34.59	PLA	4.818	69.19
A6H7I8	SP|A6H7I8|TBC14_BOVIN	NUC	NUC	15.64	CYT	14.54	PLA	12.54	29.84
A6QLA0	SP|A6QLA0|NFX1_BOVIN	NUC	NUC	42.39	CYT	7.656	CSK	5.927	32.66
A6QLE1	SP|A6QLE1|TDRD7_BOVIN	CYT	CYT	33.67	NUC	10.97	PLA	8.064	34.51
A6QLE5	SP|A6QLE5|NLRP3_BOVIN	CYT	CYT	38.14	NUC	9.929	PLA	8.19	34.51
A6QLI1	SP|A6QLI1|VGLU2_BOVIN	PLA	PLA	16.47	CYT	11.47	NUC	9.83	26.55
A6QLJ3	SP|A6QLJ3|GUF1_BOVIN	CYT	CYT	14.65	NUC	14.29	MIT	12.37	28.83
A6QLT4	SP|A6QLT4|MTM1_BOVIN	PLA	PLA	24.72	CYT	23.54	NUC	10.33	47.69
A6QLU1	SP|A6QLU1|GPDM_BOVIN	MIT	MIT	58.34	CYT	5.308	PLA	5.22	29.89
A6QLV3	SP|A6QLV3|SHOC2_BOVIN	NUC/CYT	NUC	32.82	CYT	31.97	PLA	6.008	64.24
A6QNM2	SP|A6QNM2|RRF2M_BOVIN	CYT	CYT	15.67	MIT	13.31	NUC	13.05	28.29
A6QP75	SP|A6QP75|AL2CL_BOVIN	CYT	CYT	31.88	NUC	11.38	PLA	9.762	34.39
A6QP79	SP|A6QP79|COL12_BOVIN	PLA	PLA	35.44	EXC	18.16	NUC	9.127	44.33
A6QPE7	SP|A6QPE7|ANR65_BOVIN	PLA	PLA	16.6	CYT	16.49	NUC	16.49	33.06
A6QPU5	SP|A6QPU5|SYDM_BOVIN	MIT	MIT	34.54	NUC	9.537	CYT	8.905	33.06
A6QQ24	SP|A6QQ24|PIGL_BOVIN	NUC	NUC	15.85	CYT	14.7	PLA	12.68	30.2
A6QQ71	SP|A6QQ71|FKBP6_BOVIN	NUC	NUC	15.19	CYT	14.82	PLA	10.52	29.9
A6QQ91	SP|A6QQ91|RASL3_BOVIN	NUC	NUC	16.42	CYT	14.73	PLA	14.57	30.62
A6QQJ3	SP|A6QQJ3|PERI_BOVIN	CYT	CYT	28.12	NUC	19.48	CSK	10.08	43.49
A6QQL9	SP|A6QQL9|SRP14_BOVIN	CYT	CYT	59.88	NUC	8.048	PLA	7.207	32.72
A6QQP7	SP|A6QQP7|DYSF_BOVIN	CYT	CYT	12.73	NUC	12.39	PLA	11.44	25.03
A6QQR4	SP|A6QQR4|ERC6L_BOVIN	NUC	NUC	35.03	CYT	11.72	CSK	7.416	35.86
A6QQZ7	SP|A6QQZ7|MPP7_BOVIN	PLA/JNC	PLA	30.61	JNC	30.12	CYT	7.727	60.43
A6QR40	SP|A6QR40|ELMO3_BOVIN	CYT	CYT	16.47	PLA	15.77	NUC	12.94	32.02
A6QR55	SP|A6QR55|UBP4_BOVIN	NUC/CYT	NUC	31.23	CYT	31.15	PLA	5.723	62.32
A7E2Z2-2	SP|A7E2Z2-2|EZH1_BOVIN	NUC	NUC	56.47	CYT	5.941	PLA	5.362	30.88
A7E300	SP|A7E300|RHG07_BOVIN	NUC	NUC	14.5	JNC	13.16	CYT	12.11	27.29
A7E371	SP|A7E371|PRCA1_BOVIN	NUC	NUC	18.9	CYT	14.77	PLA	12.07	32.29
A7E3C4	SP|A7E3C4|F187A_BOVIN	CYT	CYT	11.33	NUC	11.01	PLA	9.594	22.27
A7MB12	SP|A7MB12|UTP15_BOVIN	NUC	NUC	44.14	CYT	8.198	PLA	8.028	33.53
A7MB46	SP|A7MB46|PCD18_BOVIN	PLA	PLA	15.57	NUC	13.01	CYT	11.98	27.84
A7MB64	SP|A7MB64|IPRI_BOVIN	PLA	PLA	33.33	NUC	11.9	CYT	8.904	35.54
A7MB70	SP|A7MB70|SEM3C_BOVIN	EXC	EXC	56.56	NUC	5.466	PLA	5.335	30.33
A7MB73	SP|A7MB73|GT253_BOVIN	NUC	NUC	13.19	END	12.71	CYT	12.29	25.77
A7MB80	SP|A7MB80|GTF2I_BOVIN	NUC/CYT	NUC	38.37	CYT	31.98	PLA	4.194	65.86
A7MBF6	SP|A7MBF6|CA228_BOVIN	CYT	CYT	14.13	NUC	13.74	PLA	13.36	27.76
A7MBI0	SP|A7MBI0|PACN1_BOVIN	CYT	CYT	37.05	PLA	17.57	JNC	10.78	43.98
A7MBJ2	SP|A7MBJ2|SENP7_BOVIN	NUC	NUC	18.93	CYT	13.63	EXC	9.225	30.83
A7MBJ5	SP|A7MBJ5|CAND1_BOVIN	NUC	NUC	47.42	CYT	8.3	PLA	6.791	33.92
A7YSY2	SP|A7YSY2|SPA5L_BOVIN	NUC	NUC	18.85	CYT	17.53	PLA	10.83	35.9
A7YVD7	SP|A7YVD7|NDUF6_BOVIN	MIT	MIT	28.3	PLA	11.19	NUC	10.75	32.73
A7YW98	SP|A7YW98|SYRC_BOVIN	CYT	CYT	56.94	NUC	7.421	CSK	4.856	32.49
A7YWC4	SP|A7YWC4|ATAD3_BOVIN	NUC	NUC	16.3	CYT	15.87	PLA	11.38	32.04
A7YWH3	SP|A7YWH3|KCD19_BOVIN	NUC	NUC	14.1	CYT	10.96	EXC	10.45	24.28
A7YY57	SP|A7YY57|RHG29_BOVIN	NUC	NUC	17.23	CYT	14.7	PLA	10.36	31.12
A7YY75	SP|A7YY75|SEH1_BOVIN	NUC	NUC	48.08	CYT	9.326	PLA	7.125	35.16
A7Z052	SP|A7Z052|WDR6_BOVIN	CYT	CYT	38.17	PLA	9.782	NUC	9.258	34.34
A7Z056	SP|A7Z056|UBP20_BOVIN	CYT	CYT	21.44	NUC	14.32	PLA	8.857	33.21
A7Z063	SP|A7Z063|WASH1_BOVIN	NUC	NUC	18.31	CYT	15.17	PLA	14.49	32.43
A8E657	SP|A8E657|AASS_BOVIN	MIT	MIT	34.69	CYT	10.43	NUC	8.85	34.17
E1B7Q7	SP|E1B7Q7|TRIPC_BOVIN	NUC	NUC	17.42	CYT	14.08	PLA	11.43	30.45
E1BC52	SP|E1BC52|CH037_BOVIN	NUC	NUC	18.78	PLA	13.71	CYT	12.59	30.84
E1BGQ2	SP|E1BGQ2|ZCHC4_BOVIN	NUC	NUC	15.44	CYT	11.41	PLA	9.719	25.77
E1BH29	SP|E1BH29|ALKB5_BOVIN	NUC	NUC	17.84	CYT	14.71	PLA	13.81	31.53
E1BK52	SP|E1BK52|STK10_BOVIN	CYT	CYT	20.84	NUC	17.67	PLA	11.45	37.29
E1BKA3	SP|E1BKA3|AJUBA_BOVIN	NUC	NUC	19.42	PLA	14.14	CYT	13.6	31.78
E1BLP6	SP|E1BLP6|ARI5B_BOVIN	NUC	NUC	37.45	CYT	9.531	PLA	7.959	33.86
E1BLT8	SP|E1BLT8|ZDHC5_BOVIN	NUC	NUC	16.65	CYT	14.56	PLA	14.48	30.55
E1BP36-2	SP|E1BP36-2|MMS19_BOVIN	NUC	NUC	28.97	CSK	24.73	CYT	8.599	51.43
E1BP74	SP|E1BP74|MARF1_BOVIN	POX	POX	33.26	NUC	11.45	CYT	9.781	34.96
E1BPH3	SP|E1BPH3|TDRD5_BOVIN	CYT	CYT	30.54	NUC	10.88	PLA	9.498	33.27
E1BPW0	SP|E1BPW0|ENTP5_BOVIN	END	END	33.33	GOL	9.861	EXC	9.575	33.05
F1MBP6	SP|F1MBP6|KLHL3_BOVIN	CSK	CSK	50.03	NUC	8.945	CYT	8.488	34.75
F1MJM0	SP|F1MJM0|ZN326_BOVIN	NUC	NUC	33.18	CYT	11.86	PLA	9.487	35.43
F1MJR8	SP|F1MJR8|TEX14_BOVIN	CYT	CYT	22.07	NUC	12.84	PLA	9.953	31.69
F1MLB4	SP|F1MLB4|DAAF3_BOVIN	NUC	NUC	15.79	CYT	11.57	EXC	11.1	26.21
F1MRK3	SP|F1MRK3|AMOL2_BOVIN	NUC	NUC	18.28	CYT	16.18	PLA	12.19	33.74
F1MRW8	SP|F1MRW8|RN169_BOVIN	NUC	NUC	18.07	CYT	14.02	PLA	13.24	30.79
F1MT22	SP|F1MT22|LGR5_BOVIN	PLA	PLA	43.36	NUC	10.19	CYT	8.258	35.79
F1N152	SP|F1N152|HTRA1_BOVIN	EXC	EXC	38.02	NUC	10.17	PLA	9.409	34.77
F1N2W9	SP|F1N2W9|MCM9_BOVIN	NUC	NUC	18.46	CYT	14.07	PLA	10.55	31.11
F1N3B8	SP|F1N3B8|OAS2_BOVIN	NUC	NUC	20.42	MIT	17.51	CYT	9.55	36.83
F1N4M2	SP|F1N4M2|MRFL_BOVIN	NUC	NUC	13.63	CYT	12.33	PLA	10.34	25.62
F1N5V1	SP|F1N5V1|UBP37_BOVIN	NUC	NUC	19.48	CYT	15.11	PLA	10.8	33.07
G3MWR8	SP|G3MWR8|MICA3_BOVIN	CYT	CYT	25.37	CSK	22.56	NUC	12.49	46.58
G5E5X0	SP|G5E5X0|LIMD1_BOVIN	NUC	NUC	28.54	CYT	25.16	PLA	7.451	51.89
O02740	SP|O02740|GUC2F_BOVIN	PLA	PLA	60.44	CYT	7.046	NUC	5.397	31.45
O02776	SP|O02776|PARG_BOVIN	NUC/CYT	NUC	31.28	CYT	30.75	PLA	5.332	61.71
O18728	SP|O18728|FSCN2_BOVIN	CSK	CSK	36.85	NUC	8.702	PLA	8.367	32.73
O46382	SP|O46382|BIG1_BOVIN	NUC	NUC	12.91	CYT	12.28	PLA	11.74	25.02
O46411	SP|O46411|5NTC_BOVIN	CYT	CYT	44.29	NUC	9.312	PLA	7.161	34.85
O77588	SP|O77588|PLOD1_BOVIN	END	END	64.23	CYT	4.917	PLA	4.717	28.13
O77628	SP|O77628|FOS_BOVIN	NUC	NUC	54.17	CYT	9.023	PLA	6.237	34.66
O77834	SP|O77834|PRDX6_BOVIN	NUC	NUC	14.9	CYT	14.05	EXC	11.16	28.71
O97790	SP|O97790|TBCD1_BOVIN	NUC	NUC	38.33	CYT	13.03	PLA	7.046	38.37
P00727-2	SP|P00727-2|AMPL_BOVIN	CYT	CYT	55.46	PLA	6.62	NUC	6.222	31.76
P00743	SP|P00743|FA10_BOVIN	EXC	EXC	52.67	PLA	9.345	NUC	6.914	35.15
P02548	SP|P02548|NFL_BOVIN	CYT	CYT	22.12	NUC	21.3	PLA	12.21	43.06
P02698	SP|P02698|GBG1_BOVIN	NUC	NUC	24.1	CYT	21.21	EXC	14.74	44.01
P04272	SP|P04272|ANXA2_BOVIN	EXC	EXC	55.5	CYT	9.256	NUC	7.199	34.81
P05128	SP|P05128|KPCG_BOVIN	CYT	CYT	26.16	PLA	21.48	NUC	12.43	45.41
P07353	SP|P07353|IFNG_BOVIN	EXC	EXC	64.05	CYT	7.768	NUC	6.052	31.4
P08057	SP|P08057|TNNI3_BOVIN	NUC	NUC	18.27	CYT	15.25	PLA	13.83	32.51
P08760	SP|P08760|KAD3_BOVIN	MIT	MIT	56.14	CYT	7.534	NUC	6.389	32.72
P08831	SP|P08831|IL1A_BOVIN	EXC	EXC	69.19	NUC	7.362	CYT	4.565	29.22
P09487	SP|P09487|PPBT_BOVIN	PLA	PLA	61.47	EXC	5.224	CYT	5.152	29.18
P09851	SP|P09851|RASA1_BOVIN	CYT	CYT	55.45	NUC	9.12	PLA	6.73	34.65
P0CG10	SP|P0CG10|CTF8A_BOVIN	NUC	NUC	34.43	CYT	11.9	PLA	11.07	35.89
P0CG25	SP|P0CG25|EFCC1_BOVIN	NUC	NUC	18.94	CYT	15.9	PLA	13.66	33.79
P10881	SP|P10881|LA_BOVIN	NUC	NUC	18.62	CYT	14.36	PLA	10.69	31.58
P10894	SP|P10894|PLCB1_BOVIN	CYT/PLA	CYT	31.1	PLA	30.58	NUC	10.32	61.37
P11181	SP|P11181|ODB2_BOVIN	MIT	MIT	57.83	NUC	6.888	CYT	6.464	31.75
P14099-2	SP|P14099-2|PDE2A_BOVIN	CYT	CYT	14.58	PLA	13.92	NUC	13.38	28.31
P16586	SP|P16586|PDE6C_BOVIN	PLA	PLA	32.07	CYT	11.96	NUC	10.51	35.17
P17697	SP|P17697|CLUS_BOVIN	CYT/EXC	CYT	36.82	EXC	28.63	NUC	6.517	60.09
P18892	SP|P18892|BT1A1_BOVIN	PLA	PLA	28.91	EXC	21.54	CYT	11.2	46.72
P19483	SP|P19483|ATPA_BOVIN	MIT	MIT	68.48	NUC	5.071	CYT	5.05	26.91
P19534	SP|P19534|CADH2_BOVIN	PLA	PLA	66.62	NUC	5.304	JNC	4.468	27.82
P20237	SP|P20237|GBRA4_BOVIN	JNC/PLA	JNC	41.23	PLA	40.94	NUC	3.442	81.93
P22457	SP|P22457|FA7_BOVIN	EXC	EXC	53.48	PLA	9.588	NUC	6.095	35.39
P23389	SP|P23389|SCG1_BOVIN	EXC	EXC	26.99	NUC	14.16	CYT	11.26	35.86
P23726	SP|P23726|P85B_BOVIN	NUC	NUC	17.23	CYT	15.24	PLA	13.41	31.82
P26884	SP|P26884|FKBP3_BOVIN	NUC	NUC	64.84	CYT	6.696	EXC	3.956	29.94
P27674	SP|P27674|GTR1_BOVIN	PLA	PLA	44.54	CYT	13.72	EXC	6.414	40.3
P29105	SP|P29105|HPCL1_BOVIN	PLA	PLA	17.02	CYT	14.9	NUC	11.61	31.24
P29473	SP|P29473|NOS3_BOVIN	NUC	NUC	15.48	CYT	13.58	PLA	11.51	28.51
P31408	SP|P31408|VATB2_BOVIN	PLA	PLA	36.5	NUC	9.416	EXC	8.282	33.48
P31754	SP|P31754|UMPS_BOVIN	NUC	NUC	16.76	CYT	13.7	PLA	10.65	29.53
P31976	SP|P31976|EZRI_BOVIN	JNC	JNC	26.44	PLA	25.99	NUC	9.22	52.2
P32871	SP|P32871|PK3CA_BOVIN	CYT	CYT	12.5	NUC	10.97	PLA	9.403	23.11
P38657	SP|P38657|PDIA3_BOVIN	END	END	16.41	NUC	13.32	CYT	12.77	28.81
P46198	SP|P46198|IF2M_BOVIN	MIT	MIT	49.27	NUC	8.755	CYT	7.879	34.52
P49259	SP|P49259|PLA2R_BOVIN	PLA	PLA	32.01	EXC	17.17	CYT	7.373	41.88
P51176	SP|P51176|TGM2_BOVIN	PLA	PLA	13.79	CYT	13.2	NUC	11.99	26.83
P53619	SP|P53619|COPD_BOVIN	NUC	NUC	16.37	CYT	13.19	MIT	10.2	28.63
P56722	SP|P56722|PTPRN_BOVIN	PLA	PLA	54.91	NUC	8.449	CYT	7.505	33.92
P56966	SP|P56966|GGPPS_BOVIN	CYT	CYT	51.2	NUC	7.845	PLA	6.596	33.45
P57709	SP|P57709|AT2C1_BOVIN	GOL	GOL	39.42	PLA	12.07	END	9.868	37.41
P58874	SP|P58874|OPT_BOVIN	NUC	NUC	14.99	PLA	14.66	EXC	14.3	29.55
P58875	SP|P58875|S14L2_BOVIN	NUC/CYT	NUC	31.15	CYT	30.6	CSK	5.192	61.4
P61420	SP|P61420|VA0D1_BOVIN	CYT	CYT	13.77	NUC	12.64	EXC	11.16	26.11
P68399	SP|P68399|CSK21_BOVIN	NUC	NUC	16.84	CYT	14.76	PLA	9.663	30.95
P69341	SP|P69341|PARN_BOVIN	NUC/CYT	NUC	37.18	CYT	36.88	END	3.212	73.85
P79122	SP|P79122|PININ_BOVIN	NUC	NUC	27.01	JNC	17.76	CYT	12.28	40.64
P79136-2	SP|P79136-2|CAPZB_BOVIN	CSK	CSK	56.59	NUC	11.23	CYT	6.642	37.06
P80025	SP|P80025|PERL_BOVIN	EXC	EXC	49.42	CYT	8.516	PLA	6.645	34.24
P80109	SP|P80109|PHLD_BOVIN	EXC	EXC	51.37	PLA	8.039	NUC	6.135	33.67
P80227	SP|P80227|ACPH_BOVIN	CYT	CYT	61.14	NUC	6.406	PLA	5.548	30.58
P81134	SP|P81134|RENR_BOVIN	NUC	NUC	13.53	PLA	13.11	CYT	12.15	26.53
P82649	SP|P82649|RT22_BOVIN	MIT	MIT	50.9	NUC	7.634	CYT	7.467	33.21
P82916	SP|P82916|RT17_BOVIN	MIT	MIT	53.55	NUC	9.554	PLA	7.671	35.34
P82929	SP|P82929|RT34_BOVIN	MIT	MIT	54.52	NUC	7.941	CYT	7.736	33.37
P83862	SP|P83862|OX26_BOVIN	EXC	EXC	52.3	PLA	8.687	CYT	7.591	34.39
Q02337	SP|Q02337|BDH_BOVIN	MIT	MIT	56.46	PLA	7.171	CYT	6.328	32.27
Q03763	SP|Q03763|DSG1_BOVIN	PLA	PLA	16.56	NUC	13.58	CYT	11.67	29.24
Q05718	SP|Q05718|IBP6_BOVIN	EXC	EXC	49.1	PLA	9.854	NUC	8.492	35.82
Q06807	SP|Q06807|TIE2_BOVIN	PLA	PLA	61.51	CYT	5.563	EXC	5.28	29.55
Q06846	SP|Q06846|RP3A_BOVIN	CYT	CYT	19.75	NUC	13.8	PLA	12.25	31.55
Q07537	SP|Q07537|GALT1_BOVIN	GOL/EXC	GOL	35.35	EXC	34.41	CYT	4.811	69.1
Q08DA0	SP|Q08DA0|RABL6_BOVIN	NUC	NUC	20.93	CYT	16.03	PLA	11.3	35.15
Q08DA4	SP|Q08DA4|PHTF1_BOVIN	NUC	NUC	15.07	CYT	12.54	PLA	11.98	26.91
Q08DA7	SP|Q08DA7|GTDC1_BOVIN	CYT	CYT	13.12	PLA	12.11	NUC	11.68	24.98
Q08DB4	SP|Q08DB4|CPNE1_BOVIN	NUC	NUC	14.27	CYT	13.32	EXC	9.763	27.33
Q08DB5	SP|Q08DB5|STX5_BOVIN	NUC	NUC	15.87	GOL	12.8	PLA	11.76	27.79
Q08DI1	SP|Q08DI1|ETAA1_BOVIN	CYT	CYT	22.94	NUC	14.03	PLA	9.093	33.68
Q08DI8	SP|Q08DI8|PUS7_BOVIN	NUC	NUC	16.91	CYT	13.63	PLA	12.28	29.54
Q08DK1	SP|Q08DK1|IGS11_BOVIN	PLA	PLA	36.35	NUC	11.54	CYT	10.28	36.01
Q08DK3	SP|Q08DK3|KLH20_BOVIN	CYT/NUC	CYT	32.9	NUC	32.78	CSK	8.755	65.6
Q08DM7	SP|Q08DM7|SEPT3_BOVIN	CSK	CSK	23.37	CYT	15.49	PLA	13.23	35.8
Q08DQ0	SP|Q08DQ0|PKP3_BOVIN	NUC/JNC	NUC	33.58	JNC	31.58	CYT	6.559	63.86
Q08E08	SP|Q08E08|SCN4B_BOVIN	PLA	PLA	19.43	NUC	14.97	CYT	13.92	32.87
Q08E13	SP|Q08E13|RNF10_BOVIN	NUC	NUC	21.47	CYT	15.36	PLA	12.23	34.58
Q08E27	SP|Q08E27|STRBP_BOVIN	CSK	CSK	35.27	NUC	16.63	CYT	15.96	42.23
Q08E39	SP|Q08E39|SPY2_BOVIN	CSK	CSK	30.52	CYT	20.29	PLA	19.92	45.61
Q0II59	SP|Q0II59|PDXK_BOVIN	CYT	CYT	56.98	NUC	9.737	PLA	6.006	35.2
Q0II86	SP|Q0II86|SNP29_BOVIN	NUC	NUC	18.29	CYT	14.95	EXC	11.37	32.14
Q0IIC2	SP|Q0IIC2|KLD10_BOVIN	NUC	NUC	16.5	CYT	14.18	PLA	12.29	29.96
Q0IIC4	SP|Q0IIC4|ZMAT3_BOVIN	NUC	NUC	54.32	PLA	6.387	CYT	6.116	31.61
Q0IIG5	SP|Q0IIG5|PFKAM_BOVIN	CYT	CYT	14.5	NUC	11.94	PLA	10.98	25.76
Q0IIK5	SP|Q0IIK5|DDX1_BOVIN	NUC/CYT	NUC	34.29	CYT	34.22	MIT	4.291	68.47
Q0IIL1	SP|Q0IIL1|MICU1_BOVIN	MIT	MIT	42.62	NUC	9.948	CYT	9.128	35.39
Q0P569	SP|Q0P569|NUCB1_BOVIN	CYT	CYT	30.46	GOL	28.45	NUC	10.13	57.72
Q0P591	SP|Q0P591|MA6D1_BOVIN	GOL	GOL	18.75	CSK	17.73	NUC	15.28	36.1
Q0P5D1	SP|Q0P5D1|CC153_BOVIN	NUC	NUC	22.27	CYT	16.56	CSK	15.18	36.61
Q0P5E7	SP|Q0P5E7|GTPB8_BOVIN	NUC	NUC	12.58	CYT	11.47	EXC	10.54	23.78
Q0P5F7	SP|Q0P5F7|PI42C_BOVIN	CYT/PLA	CYT	35.49	PLA	34.05	NUC	7.202	68.54
Q0P5I5	SP|Q0P5I5|HOGA1_BOVIN	MIT	MIT	31.52	NUC	11.93	PLA	11.01	34.93
Q0P5I8	SP|Q0P5I8|GET4_BOVIN	CYT	CYT	39.24	NUC	10.87	PLA	10.84	35.9
Q0P5J0	SP|Q0P5J0|QRIC1_BOVIN	NUC	NUC	20.46	CYT	14.85	PLA	10.25	33.33
Q0P5J1	SP|Q0P5J1|FACR2_BOVIN	CYT	CYT	14.36	NUC	11.23	MIT	9.678	24.79
Q0V7M1	SP|Q0V7M1|KPSH1_BOVIN	NUC	NUC	21.07	CYT	19.34	PLA	10.51	39.71
Q0V7M8	SP|Q0V7M8|F167A_BOVIN	CYT	CYT	17.81	NUC	16.63	PLA	10.08	34.04
Q0V8C2	SP|Q0V8C2|EXOC3_BOVIN	CYT	CYT	14.55	PLA	12.89	NUC	12.81	26.98
Q0V8R7	SP|Q0V8R7|NSUN4_BOVIN	NUC	NUC	13.85	CYT	11.65	PLA	11.06	24.94
Q0VBZ8	SP|Q0VBZ8|PRR14_BOVIN	NUC	NUC	18.66	CYT	16.3	PLA	14.23	34.14
Q0VC30	SP|Q0VC30|DPOG2_BOVIN	MIT	MIT	54.57	NUC	6.762	CYT	6.52	32.01
Q0VC50	SP|Q0VC50|RT4I1_BOVIN	MIT	MIT	50.91	PLA	7.846	CYT	6.323	33.45
Q0VC66	SP|Q0VC66|CTU1_BOVIN	CYT	CYT	36.88	PLA	11.45	NUC	10.18	36.03
Q0VC84	SP|Q0VC84|C1GLT_BOVIN	PLA	PLA	63.51	NUC	4.303	CYT	4.16	27.66
Q0VCC5	SP|Q0VCC5|REPI1_BOVIN	NUC	NUC	48.32	CYT	14.73	EXC	6.156	41.88
Q0VCH4	SP|Q0VCH4|G3ST3_BOVIN	NUC	NUC	14.98	CYT	13.88	PLA	10.74	28.54
Q0VCI1	SP|Q0VCI1|OSGEP_BOVIN	CYT	CYT	24.71	NUC	22.99	PLA	7.193	46.89
Q0VCM4	SP|Q0VCM4|PYGL_BOVIN	NUC	NUC	13.23	CYT	12.54	CSK	10.57	25.59
Q0VCP3	SP|Q0VCP3|OLFL3_BOVIN	EXC	EXC	42.95	CYT	8.828	NUC	8.423	34.11
Q0VCW8	SP|Q0VCW8|PDCL3_BOVIN	CYT	CYT	38.16	NUC	15.54	PLA	8.849	41.55
Q0VCX4	SP|Q0VCX4|CTNB1_BOVIN	NUC	NUC	14.75	CYT	12.46	PLA	11.25	26.59
Q0X0E2	SP|Q0X0E2|HEXI2_BOVIN	NUC	NUC	35.5	CYT	15.73	PLA	7.322	41.1
Q10568	SP|Q10568|CPSF2_BOVIN	NUC	NUC	16.38	CYT	13.21	PLA	10.22	28.66
Q10741	SP|Q10741|ADA10_BOVIN	PLA	PLA	51.46	GOL	25.67	NUC	3.316	57.23
Q148G5	SP|Q148G5|PROD_BOVIN	MIT	MIT	36.37	NUC	10.85	CYT	9.873	35.17
Q148G8	SP|Q148G8|UQCC3_BOVIN	NUC	NUC	18.66	PLA	16.04	CYT	15.41	33.79
Q148I1	SP|Q148I1|PAAF1_BOVIN	NUC	NUC	12.94	CYT	12.28	PLA	11.43	25.06
Q148K5	SP|Q148K5|PX11B_BOVIN	POX	POX	35	PLA	9.508	NUC	8.893	33.16
Q148M6	SP|Q148M6|MXRA8_BOVIN	PLA	PLA	54.2	NUC	8.156	CYT	7.937	33.64
Q17Q97	SP|Q17Q97|CS060_BOVIN	CYT	CYT	14.6	EXC	13.23	PLA	12.15	27.45
Q17QG2	SP|Q17QG2|NUDC_BOVIN	NUC	NUC	30.09	CSK	27.05	CYT	9.693	55.4
Q17QH9	SP|Q17QH9|IQCD_BOVIN	NUC	NUC	19.81	CYT	16.61	PLA	10.23	35.25
Q17QJ1	SP|Q17QJ1|ACSF2_BOVIN	PLA	PLA	12.82	NUC	12.19	CYT	11.22	24.85
Q17QN2	SP|Q17QN2|TOE1_BOVIN	NUC	NUC	38.99	PLA	8.495	CYT	8.135	33
Q17QV2	SP|Q17QV2|MON1A_BOVIN	NUC	NUC	18.27	PLA	14.43	CYT	11.2	31.44
Q17QX2	SP|Q17QX2|ZGPAT_BOVIN	NUC	NUC	29.56	CYT	13.1	PLA	10.09	35.64
Q1ECT8	SP|Q1ECT8|CSMT1_BOVIN	NUC	NUC	18.36	CYT	15.84	PLA	14.52	33.34
Q1JP79	SP|Q1JP79|ARC1A_BOVIN	CSK	CSK	26.76	CYT	9.328	NUC	9.152	29.8
Q1JPJ2	SP|Q1JPJ2|XPP1_BOVIN	CYT	CYT	44.68	MIT	7.142	NUC	7.034	32.37
Q1JQA2	SP|Q1JQA2|SMAD1_BOVIN	NUC/CYT	NUC	39.94	CYT	39.71	PLA	3.25	79.47
Q1JQD9	SP|Q1JQD9|LMBL2_BOVIN	NUC	NUC	19.69	CYT	13.45	PLA	10.36	31.08
Q1LZE9	SP|Q1LZE9|PRS23_BOVIN	EXC	EXC	15.65	NUC	12.84	CYT	12.7	27.69
Q1LZG6	SP|Q1LZG6|CCNB1_BOVIN	NUC	NUC	15.24	CYT	13.28	PLA	13.19	27.96
Q1LZH7	SP|Q1LZH7|KANK2_BOVIN	CYT	CYT	16.39	NUC	15.37	PLA	13.52	31.44
Q1RMH9	SP|Q1RMH9|DNJC2_BOVIN	NUC/CYT	NUC	32.95	CYT	30.95	PLA	6.611	62.63
Q1RMS8	SP|Q1RMS8|FBX25_BOVIN	NUC	NUC	48.06	PLA	7.539	CYT	7.531	33.07
Q1RMT7	SP|Q1RMT7|RIOK3_BOVIN	CYT	CYT	14.72	NUC	14.1	EXC	10.44	28.64
Q1RMU2	SP|Q1RMU2|CYLD_BOVIN	NUC	NUC	13.22	CYT	12.6	PLA	10.39	25.67
Q1RMU5	SP|Q1RMU5|RBM5_BOVIN	NUC	NUC	49.28	CYT	9.049	PLA	6.381	34.86
Q1RMU7	SP|Q1RMU7|SESQ2_BOVIN	GOL	GOL	33.04	NUC	9.969	PLA	9.347	33.09
Q1RMV0	SP|Q1RMV0|PEX5_BOVIN	CYT/POX	CYT	36.96	POX	36.46	NUC	4.792	73.06
Q1RMX9	SP|Q1RMX9|DCNL5_BOVIN	NUC	NUC	16.68	CYT	15.51	PLA	9.952	31.82
Q27958	SP|Q27958|DPOLB_BOVIN	NUC/CYT	NUC	34.37	CYT	33.8	PLA	5.368	67.78
Q27966-2	SP|Q27966-2|MYO1C_BOVIN	CYT/PLA	CYT	33.64	PLA	31.31	CSK	8.802	63.43
Q27969	SP|Q27969|ITFG2_BOVIN	NUC	NUC	13.85	CYT	12.27	EXC	11.71	25.71
Q28009	SP|Q28009|FUS_BOVIN	NUC	NUC	42.92	CYT	16.66	PLA	8.288	43.94
Q28021	SP|Q28021|ROCK2_BOVIN	CYT/PLA	CYT	37.28	PLA	35.22	NUC	6.263	71
Q28044	SP|Q28044|ADRB2_BOVIN	PLA	PLA	74.69	JNC	2.978	EXC	2.866	21.97
Q28068	SP|Q28068|CALI_BOVIN	CSK	CSK	57.89	NUC	5.462	CYT	5.189	30.14
Q28106	SP|Q28106|CNTN1_BOVIN	PLA	PLA	64.89	NUC	5.395	EXC	4.607	28.47
Q28141	SP|Q28141|DHX9_BOVIN	NUC/CYT	NUC	33.77	CYT	31.24	PLA	5.36	63.37
Q28156	SP|Q28156|PDE5A_BOVIN	CYT	CYT	45.25	PLA	9.346	NUC	8.149	34.99
Q29397	SP|Q29397|SV2A_BOVIN	CYT	CYT	49.06	NUC	8.342	PLA	7.541	34.03
Q29441	SP|Q29441|CNGA3_BOVIN	PLA	PLA	61.25	NUC	7.068	CYT	6.196	31.3
Q29466-2	SP|Q29466-2|VPP1_BOVIN	CYT	CYT	40.3	PLA	19.5	NUC	5.626	47.36
Q29626	SP|Q29626|PTGIS_BOVIN	END	END	51.21	NUC	7.488	CYT	6.864	33.03
Q29RI6	SP|Q29RI6|CAB39_BOVIN	CYT	CYT	15.97	CSK	13.42	NUC	10.75	28.64
Q29RK0	SP|Q29RK0|ZN574_BOVIN	NUC	NUC	28.17	CYT	17.06	PLA	10.4	40.2
Q29RL1-2	SP|Q29RL1-2|CF206_BOVIN	NUC	NUC	13.62	CYT	11.56	PLA	10.23	24.66
Q29RM6-2	SP|Q29RM6-2|NRAC_BOVIN	CYT	CYT	20.94	NUC	20.22	EXC	14.09	40.86
Q29RR5	SP|Q29RR5|TFP11_BOVIN	NUC/CYT	NUC	30.65	CYT	30.33	PLA	5.506	60.78
Q29RT6	SP|Q29RT6|KI20A_BOVIN	NUC	NUC	16.6	CYT	16.12	CSK	11.38	32.56
Q2HJ18	SP|Q2HJ18|VP33B_BOVIN	LYS	LYS	42.46	NUC	8.942	CYT	8.523	34.17
Q2HJ40	SP|Q2HJ40|BACE1_BOVIN	EXC	EXC	13.51	NUC	12.85	PLA	10.76	26.18
Q2HJ46	SP|Q2HJ46|RNF8_BOVIN	NUC	NUC	32.19	CYT	13.03	PLA	8.79	36.55
Q2HJ49	SP|Q2HJ49|MOES_BOVIN	PLA	PLA	28.66	JNC	27.76	NUC	8.582	55.91
Q2HJ55	SP|Q2HJ55|SAM50_BOVIN	CYT	CYT	15.03	NUC	13.19	PLA	9.524	27.7
Q2HJ60	SP|Q2HJ60|ROA2_BOVIN	NUC/CYT	NUC	41.91	CYT	31.12	EXC	5.841	65.15
Q2HJ75	SP|Q2HJ75|RITA1_BOVIN	NUC	NUC	19.98	PLA	14.73	CYT	13.65	32.89
Q2HJ90	SP|Q2HJ90|LRC42_BOVIN	NUC	NUC	16.37	CYT	14.58	PLA	11.79	30.39
Q2HJ93	SP|Q2HJ93|PHF11_BOVIN	NUC	NUC	28.13	CYT	15.09	CSK	8.324	37.58
Q2HJA9	SP|Q2HJA9|PHLP_BOVIN	CYT	CYT	22.11	NUC	16.93	PLA	10.1	37.02
Q2HJD7	SP|Q2HJD7|3HIDH_BOVIN	MIT	MIT	49.07	NUC	9.143	CYT	8.716	34.97
Q2HJE1	SP|Q2HJE1|WDR91_BOVIN	NUC	NUC	14.17	PLA	12.86	CYT	12.55	26.67
Q2HJF3	SP|Q2HJF3|ORC6_BOVIN	NUC	NUC	37.07	CYT	9.192	PLA	8.653	33.36
Q2HJF9	SP|Q2HJF9|RSAD2_BOVIN	END	END	25.57	GOL	25.49	NUC	8.621	51.02
Q2HJG2	SP|Q2HJG2|PUF60_BOVIN	NUC	NUC	44.81	CYT	10.37	PLA	7.881	36.18
Q2HJG8	SP|Q2HJG8|TAF7_BOVIN	NUC	NUC	51.67	CYT	11.97	PLA	5.504	38.38
Q2KHU0	SP|Q2KHU0|SERB_BOVIN	NUC	NUC	18.91	CYT	16.54	MIT	10.31	34.61
Q2KHV7	SP|Q2KHV7|UBP2_BOVIN	NUC/CYT	NUC	30.71	CYT	30.64	PLA	5.486	61.31
Q2KHW5	SP|Q2KHW5|ACBG1_BOVIN	CYT	CYT	16.49	PLA	13.47	NUC	11.25	29.06
Q2KI19	SP|Q2KI19|GPT11_BOVIN	NUC	NUC	19.9	CYT	17.18	PLA	10.76	36.08
Q2KI51	SP|Q2KI51|PR15A_BOVIN	NUC	NUC	18	PLA	14.14	CYT	13.63	30.9
Q2KI54	SP|Q2KI54|ARMC8_BOVIN	NUC	NUC	14.62	CYT	13.77	PLA	12.57	28.16
Q2KI62	SP|Q2KI62|PTCD3_BOVIN	NUC	NUC	15.28	CYT	14.24	PLA	10.72	29.22
Q2KI74	SP|Q2KI74|TRADD_BOVIN	CSK	CSK	32.53	NUC	12.97	CYT	11.54	36.6
Q2KIA5	SP|Q2KIA5|DNM1L_BOVIN	CYT	CYT	32.22	GOL	29.15	CSK	6.795	59.49
Q2KIE2	SP|Q2KIE2|HAX1_BOVIN	NUC	NUC	19.19	CYT	14.29	PLA	12.03	31.85
Q2KII6	SP|Q2KII6|NGDN_BOVIN	NUC	NUC	29.91	CYT	27.47	PLA	9.934	55.99
Q2KIN0	SP|Q2KIN0|ZCHC7_BOVIN	NUC	NUC	17.36	CYT	12.53	PLA	11.28	28.44
Q2KIP2	SP|Q2KIP2|HASP_BOVIN	NUC	NUC	32.24	CYT	10.67	PLA	9.859	33.66
Q2KIQ5	SP|Q2KIQ5|T23O_BOVIN	NUC	NUC	15.4	CYT	13.09	CSK	10.93	27.84
Q2KIT4	SP|Q2KIT4|DNJB4_BOVIN	CYT	CYT	33.85	PLA	28.04	NUC	11.64	58.29
Q2KIZ8	SP|Q2KIZ8|MCM6_BOVIN	NUC	NUC	53.21	CYT	7.926	PLA	5.825	33.45
Q2KJ16	SP|Q2KJ16|PHKG2_BOVIN	NUC	NUC	19.03	CYT	18.4	PLA	12.74	37.2
Q2KJ21	SP|Q2KJ21|CACO1_BOVIN	NUC	NUC	28.8	CYT	27.91	PLA	7.769	56.21
Q2KJ37	SP|Q2KJ37|ERD22_BOVIN	END	END	69.41	PLA	4.824	CYT	4.597	26.29
Q2KJ56	SP|Q2KJ56|HOME1_BOVIN	CYT/JNC	CYT	32.68	JNC	30.61	NUC	8.248	61.98
Q2KJ61	SP|Q2KJ61|ELP3_BOVIN	CYT/NUC	CYT	38.44	NUC	34.93	EXC	3.593	70.8
Q2KJ84	SP|Q2KJ84|TMED5_BOVIN	CYT	CYT	15.44	NUC	14.74	EXC	11.47	29.97
Q2KJA6	SP|Q2KJA6|INT9_BOVIN	NUC	NUC	46.74	CYT	7.341	EXC	6.222	32.77
Q2KJC3	SP|Q2KJC3|MPEG1_BOVIN	NUC	NUC	13.2	PLA	12.16	CYT	11.56	25.1
Q2KJD8	SP|Q2KJD8|CDN2B_BOVIN	CYT	CYT	28.58	NUC	26.51	PLA	9.887	53.96
Q2KJD9	SP|Q2KJD9|ELOV5_BOVIN	END	END	45.8	NUC	6.712	MIT	6.562	31.99
Q2KJF7	SP|Q2KJF7|GLCTK_BOVIN	CYT	CYT	25.47	MIT	22.92	NUC	9.506	47.15
Q2KJG8	SP|Q2KJG8|BCKD_BOVIN	MIT	MIT	60.92	NUC	5.856	CYT	5.749	30.01
Q2KJH6	SP|Q2KJH6|SERPH_BOVIN	END	END	49.21	NUC	10.39	PLA	7.143	36.46
Q2KJI3	SP|Q2KJI3|FA49B_BOVIN	NUC	NUC	14.22	EXC	13.23	PLA	11.4	27.18
Q2KJJ0	SP|Q2KJJ0|PRP6_BOVIN	NUC	NUC	46.31	CYT	8.469	CSK	5.911	34.05
Q2M2S6	SP|Q2M2S6|HPIP_BOVIN	NUC	NUC	29.95	CYT	26.84	PLA	11.32	55.03
Q2M2T7	SP|Q2M2T7|RT24_BOVIN	MIT	MIT	54.38	PLA	6.133	CYT	5.982	31.32
Q2NKZ1	SP|Q2NKZ1|TCPH_BOVIN	CYT	CYT	46.6	NUC	8.77	CSK	6.468	34.42
Q2NL14-2	SP|Q2NL14-2|KANL2_BOVIN	NUC	NUC	16.28	CYT	12.1	EXC	9.597	27.2
Q2NL21	SP|Q2NL21|DJC11_BOVIN	NUC	NUC	15.64	CYT	14.16	PLA	10.41	29.36
Q2NL37	SP|Q2NL37|BCCIP_BOVIN	NUC	NUC	35.33	CYT	15.81	PLA	8.412	41.15
Q2T9N1	SP|Q2T9N1|F1142_BOVIN	NUC	NUC	17.74	CYT	17.35	PLA	13.01	34.96
Q2T9N4	SP|Q2T9N4|PMF1_BOVIN	NUC	NUC	28.31	CYT	12.84	PLA	10.52	34.79
Q2T9S4	SP|Q2T9S4|PGP_BOVIN	NUC	NUC	17.75	PLA	14.14	CYT	13.93	30.74
Q2T9U1	SP|Q2T9U1|SRP54_BOVIN	CYT/NUC	CYT	38.02	NUC	33.22	MIT	4.456	67.81
Q2T9W0	SP|Q2T9W0|BACD1_BOVIN	NUC	NUC	42.8	CYT	15.42	PLA	7.985	42.28
Q2T9W8	SP|Q2T9W8|ANR61_BOVIN	PLA	PLA	14.96	CYT	14.28	NUC	14.24	29.03
Q2T9W9	SP|Q2T9W9|CAAP1_BOVIN	NUC	NUC	20.5	CYT	15.08	PLA	15.06	33.65
Q2T9X8	SP|Q2T9X8|SPICE_BOVIN	CSK	CSK	24.85	NUC	16.46	CYT	13.26	37.85
Q2T9Y0	SP|Q2T9Y0|RSRC1_BOVIN	NUC	NUC	32.82	CYT	24.61	PLA	8.309	52.71
Q2T9Z0	SP|Q2T9Z0|TRI17_BOVIN	CYT	CYT	19.51	NUC	18.65	PLA	9.378	37.83
Q2T9Z2	SP|Q2T9Z2|FND11_BOVIN	NUC	NUC	16.06	CYT	12.4	PLA	11.87	27.42
Q2T9Z6	SP|Q2T9Z6|CC175_BOVIN	NUC	NUC	16.66	CYT	15.94	CSK	10.93	32.36
Q2TA08	SP|Q2TA08|BAG5_BOVIN	CYT	CYT	16.6	NUC	15.25	MIT	9.424	31.42
Q2TBG8	SP|Q2TBG8|UCHL3_BOVIN	CYT	CYT	58.27	NUC	6.809	PLA	5.835	31.59
Q2TBK0	SP|Q2TBK0|CF163_BOVIN	NUC	NUC	16.47	CYT	14.09	CSK	11.75	29.83
Q2TBR0	SP|Q2TBR0|PCCB_BOVIN	MIT	MIT	60.74	CYT	5.511	NUC	5.377	29.66
Q2TBS9	SP|Q2TBS9|SMU1_BOVIN	NUC/CYT	NUC	35.67	CYT	35.17	PLA	4.138	70.49
Q2TBT3	SP|Q2TBT3|ECHD2_BOVIN	NUC	NUC	14.09	MIT	13.64	PLA	12.96	27.6
Q2TBT7	SP|Q2TBT7|FXR1_BOVIN	CYT	CYT	45.07	NUC	26.46	PLA	4.853	58.22
Q2TBX2	SP|Q2TBX2|PFD3_BOVIN	CYT/NUC	CYT	38	NUC	37.73	END	3.662	75.53
Q2TLZ3	SP|Q2TLZ3|MACOI_BOVIN	NUC	NUC	44.72	CYT	9.466	CSK	7.321	35.08
Q2YDD0	SP|Q2YDD0|HSP7E_BOVIN	CYT	CYT	39.72	NUC	9.992	PLA	7.777	34.93
Q2YDD2	SP|Q2YDD2|SMG9_BOVIN	NUC	NUC	19.24	CYT	15.11	PLA	12.92	32.93
Q2YDD9	SP|Q2YDD9|ADT4_BOVIN	MIT	MIT	42.44	CYT	24.48	NUC	6.684	54.91
Q2YDE9	SP|Q2YDE9|TES_BOVIN	JNC/CYT	JNC	34.74	CYT	34.31	NUC	4.624	68.75
Q2YDF9	SP|Q2YDF9|PCGF1_BOVIN	NUC	NUC	48.66	CYT	9.255	PLA	6.489	35.09
Q2YDI2	SP|Q2YDI2|ORC4_BOVIN	NUC	NUC	51.32	CYT	9	MIT	5.469	34.79
Q32KP2	SP|Q32KP2|LRC23_BOVIN	NUC	NUC	16.48	CYT	15.31	PLA	12.42	31.42
Q32KQ1	SP|Q32KQ1|F228A_BOVIN	NUC	NUC	13.15	CYT	11.42	PLA	10.93	24.14
Q32KV2	SP|Q32KV2|MAEL_BOVIN	NUC	NUC	30.56	CYT	29.3	EXC	5.906	59.11
Q32KY1-2	SP|Q32KY1-2|DRC1_BOVIN	NUC	NUC	17.46	CYT	13.34	CSK	10.57	29.53
Q32KZ2	SP|Q32KZ2|ACL7A_BOVIN	CSK	CSK	15.27	CYT	12.3	NUC	11	26.75
Q32L27	SP|Q32L27|UB2Q2_BOVIN	CYT	CYT	39.83	NUC	13.58	PLA	7.15	39.39
Q32L60	SP|Q32L60|TRI13_BOVIN	END	END	41	NUC	9.175	PLA	9.116	34.21
Q32L91	SP|Q32L91|ACL7B_BOVIN	CYT	CYT	17.13	NUC	15.72	CSK	12.4	32.39
Q32LB0	SP|Q32LB0|WDR70_BOVIN	NUC	NUC	19.22	CYT	14.35	PLA	11.57	31.93
Q32LB7	SP|Q32LB7|VATE2_BOVIN	CYT	CYT	15.49	NUC	13.74	EXC	12.96	28.72
Q32LB9	SP|Q32LB9|NOA1_BOVIN	CYT	CYT	13.95	NUC	12.99	PLA	12.08	26.68
Q32LC7	SP|Q32LC7|G3BP1_BOVIN	CYT	CYT	23.31	NUC	17.18	PLA	9.576	38
Q32LE2	SP|Q32LE2|GKAP1_BOVIN	GOL	GOL	28.93	NUC	13.76	CYT	11.09	36.21
Q32LH3	SP|Q32LH3|PIHD2_BOVIN	CYT	CYT	17.14	NUC	17.13	EXC	9.424	34.26
Q32PB1	SP|Q32PB1|PROF3_BOVIN	EXC	EXC	17.2	PLA	16.71	CYT	11.24	33.75
Q32PG1	SP|Q32PG1|AP3B1_BOVIN	NUC	NUC	20.78	CYT	15.87	PLA	11.63	34.85
Q32PI1	SP|Q32PI1|VRK1_BOVIN	NUC	NUC	50.36	CYT	8.994	PLA	5.496	34.8
Q32PI8	SP|Q32PI8|RT27_BOVIN	MIT	MIT	49.93	NUC	8.241	PLA	7.543	33.92
Q32PJ3	SP|Q32PJ3|ORC3_BOVIN	NUC	NUC	43.51	CYT	9.325	EXC	7.185	34.77
Q3B7M1	SP|Q3B7M1|KLH36_BOVIN	CYT	CYT	15.46	NUC	14.56	PLA	10.27	29.75
Q3B7M5	SP|Q3B7M5|LASP1_BOVIN	CYT/CSK	CYT	33.06	CSK	30.93	NUC	9.427	62.62
Q3B7M6	SP|Q3B7M6|NEDD1_BOVIN	CSK	CSK	33.14	CYT	11.59	NUC	10.96	35.09
Q3B7M7	SP|Q3B7M7|RMP_BOVIN	NUC	NUC	36.04	CYT	12.15	PLA	8.462	36.68
Q3MHE4	SP|Q3MHE4|MSH2_BOVIN	NUC	NUC	17.99	CYT	12.99	EXC	9.742	29.43
Q3MHE8	SP|Q3MHE8|SRPRA_BOVIN	END	END	50.62	NUC	9.434	CYT	6.896	35.32
Q3MHF7	SP|Q3MHF7|MTAP_BOVIN	CYT	CYT	52.65	NUC	7.172	PLA	7.108	32.62
Q3MHF8	SP|Q3MHF8|LS14A_BOVIN	CYT	CYT	49.27	NUC	12.73	PLA	7.013	39.34
Q3MHG6	SP|Q3MHG6|GTPBA_BOVIN	NUC	NUC	37.09	CYT	10.1	PLA	8.181	34.45
Q3MHH4	SP|Q3MHH4|SYQ_BOVIN	CYT	CYT	40.56	NUC	8.09	PLA	7.169	32.85
Q3MHH6	SP|Q3MHH6|PYRD2_BOVIN	CYT	CYT	14.07	NUC	12.41	PLA	11.48	26.04
Q3MHP0	SP|Q3MHP0|RBM40_BOVIN	NUC	NUC	43.75	CYT	10.13	PLA	6.731	35.77
Q3MHX5	SP|Q3MHX5|SUCB2_BOVIN	MIT	MIT	58.31	NUC	6.805	CYT	5.62	31.58
Q3MHY8	SP|Q3MHY8|RBM7_BOVIN	NUC	NUC	17.88	CYT	13.51	PLA	11.49	30.01
Q3MI00	SP|Q3MI00|DNJB1_BOVIN	CYT/NUC	CYT	33.85	NUC	32.17	PLA	8.432	64.91
Q3SWX5	SP|Q3SWX5|CADH6_BOVIN	PLA	PLA	64.67	NUC	5.041	JNC	4.606	28.14
Q3SWX9	SP|Q3SWX9|RAD21_BOVIN	NUC	NUC	50.79	CYT	9.476	PLA	7.432	35.37
Q3SX14	SP|Q3SX14|GELS_BOVIN	CSK	CSK	61.9	NUC	5.882	CYT	5.169	29.81
Q3SX41	SP|Q3SX41|LC7L3_BOVIN	NUC	NUC	45.77	CYT	13.5	PLA	7.335	40.14
Q3SYU1	SP|Q3SYU1|NOC2L_BOVIN	NUC	NUC	29.81	CYT	13.93	PLA	10.51	36.79
Q3SYU3	SP|Q3SYU3|S39A1_BOVIN	PLA	PLA	30.67	END	24.26	CYT	9.279	51.41
Q3SYV3	SP|Q3SYV3|OXA1L_BOVIN	MIT	MIT	20.4	NUC	13.18	PLA	12.76	31.16
Q3SYW9	SP|Q3SYW9|CHTOP_BOVIN	NUC	NUC	46.28	CYT	16.99	PLA	8.026	44.74
Q3SYX0	SP|Q3SYX0|NDRG1_BOVIN	CYT	CYT	17.15	NUC	14.95	PLA	11.67	31.4
Q3SYY9	SP|Q3SYY9|LMBD1_BOVIN	LYS	LYS	33.48	PLA	12.23	NUC	10.02	36
Q3SYZ4	SP|Q3SYZ4|SYDC_BOVIN	CYT	CYT	63.13	NUC	5.042	CSK	4.511	28.57
Q3SZ52	SP|Q3SZ52|UB2V1_BOVIN	NUC	NUC	53.17	CYT	7.313	CSK	6.78	32.75
Q3SZ54	SP|Q3SZ54|IF4A1_BOVIN	CYT	CYT	25.12	NUC	22.91	EXC	7.057	46.97
Q3SZ57	SP|Q3SZ57|FETA_BOVIN	EXC	EXC	42.95	CYT	10.63	NUC	7.372	36.26
Q3SZ71	SP|Q3SZ71|MPPB_BOVIN	MIT	MIT	42.67	CYT	9.467	NUC	8.97	34.83
Q3SZ76	SP|Q3SZ76|COMD3_BOVIN	PLA	PLA	15.22	NUC	14.58	EXC	11	29.61
Q3SZ87	SP|Q3SZ87|SSRG_BOVIN	END	END	51.87	PLA	9.554	NUC	8.861	35.43
Q3SZC2	SP|Q3SZC2|PSB9_BOVIN	NUC	NUC	19.81	CYT	17.59	EXC	10.08	36.56
Q3SZC4	SP|Q3SZC4|NSF1C_BOVIN	NUC/GOL	NUC	32.83	GOL	29.79	CYT	7.024	60.71
Q3SZE9	SP|Q3SZE9|TBCC_BOVIN	CYT	CYT	26.02	NUC	14.97	PLA	10.03	36.45
Q3SZM1	SP|Q3SZM1|MK67I_BOVIN	NUC	NUC	31.26	CYT	12.12	PLA	9.912	35.08
Q3T046	SP|Q3T046|BDH2_BOVIN	CYT	CYT	41.11	NUC	9.548	PLA	8.861	34.67
Q3T057	SP|Q3T057|RL23_BOVIN	NUC	NUC	20.61	PLA	16.83	EXC	9.77	36.02
Q3T063	SP|Q3T063|NADC_BOVIN	NUC	NUC	16.26	CYT	14.85	PLA	11.46	30.67
Q3T0L7	SP|Q3T0L7|RL28_BOVIN	PLA	PLA	16.01	NUC	13.11	JNC	10.29	28.27
Q3T0R4	SP|Q3T0R4|DRS7B_BOVIN	PLA	PLA	15.71	CYT	12.99	NUC	12.1	27.92
Q3T0V9	SP|Q3T0V9|DEOC_BOVIN	NUC	NUC	13.56	CYT	12.93	PLA	12.58	26.33
Q3T0W4	SP|Q3T0W4|PP1R7_BOVIN	NUC	NUC	38.73	CYT	11.53	PLA	8.134	36.58
Q3T0X8	SP|Q3T0X8|NHRF3_BOVIN	CYT	CYT	29.68	PLA	26.35	NUC	9.421	54.16
Q3T122	SP|Q3T122|EIF3D_BOVIN	NUC	NUC	15.93	CYT	14.32	PLA	10.62	29.77
Q3T148	SP|Q3T148|EIF3M_BOVIN	CYT	CYT	15.1	NUC	12.43	PLA	12.07	26.79
Q3ZBA3	SP|Q3ZBA3|PKHA2_BOVIN	NUC	NUC	17.6	CYT	15.95	EXC	9.458	33
Q3ZBA6	SP|Q3ZBA6|DJB11_BOVIN	END	END	59.8	NUC	6.527	CYT	6.368	30.99
Q3ZBD7	SP|Q3ZBD7|G6PI_BOVIN	CYT/EXC	CYT	40.6	EXC	38.42	PLA	3.298	77.29
Q3ZBE0	SP|Q3ZBE0|DQX1_BOVIN	NUC	NUC	18.64	PLA	13.29	CYT	12.7	30.23
Q3ZBE5	SP|Q3ZBE5|SLU7_BOVIN	NUC/CYT	NUC	33.73	CYT	31.83	CSK	5.364	64.31
Q3ZBE9	SP|Q3ZBE9|NSDHL_BOVIN	EXC	EXC	12.24	PLA	10.49	END	10.1	22.33
Q3ZBG4	SP|Q3ZBG4|HES1_BOVIN	NUC	NUC	55.06	CYT	8.838	PLA	7.87	34.36
Q3ZBI3	SP|Q3ZBI3|RNH2B_BOVIN	CYT	CYT	13.87	NUC	13.63	EXC	9.908	27.43
Q3ZBI5	SP|Q3ZBI5|NRROS_BOVIN	PLA	PLA	15.36	CYT	14.83	NUC	14.66	30.04
Q3ZBK1	SP|Q3ZBK1|WDR89_BOVIN	CYT	CYT	13.41	PLA	12.42	NUC	11.64	25.57
Q3ZBK6	SP|Q3ZBK6|LSM4_BOVIN	NUC	NUC	23.06	CYT	16.46	PLA	11.47	36.91
Q3ZBK7	SP|Q3ZBK7|GLE1_BOVIN	NUC	NUC	29.57	CYT	28.18	CSK	6.268	56.94
Q3ZBN0	SP|Q3ZBN0|ABRAL_BOVIN	NUC	NUC	19.03	PLA	16.47	CYT	11.75	34.59
Q3ZBT2	SP|Q3ZBT2|FBX9_BOVIN	NUC	NUC	15.93	CYT	14.66	EXC	9.995	30.2
Q3ZBU9	SP|Q3ZBU9|UBXN4_BOVIN	NUC	NUC	29.94	END	26.01	CYT	8.603	53.76
Q3ZBY2	SP|Q3ZBY2|TAGL3_BOVIN	PLA	PLA	16.9	CYT	11.21	CSK	10.37	26.5
Q3ZC98	SP|Q3ZC98|NUP85_BOVIN	NUC	NUC	13.52	CYT	12.56	PLA	9.768	25.82
Q3ZCC3	SP|Q3ZCC3|TRAF6_BOVIN	CYT/NUC	CYT	32.46	NUC	32.18	CSK	4.556	64.46
Q3ZCC8	SP|Q3ZCC8|TPPP3_BOVIN	NUC	NUC	14.07	CYT	13.02	CSK	10.98	26.8
Q3ZCH0	SP|Q3ZCH0|GRP75_BOVIN	MIT	MIT	53.92	CYT	10.73	NUC	8.47	36.73
Q4PJK1	SP|Q4PJK1|KCAB1_BOVIN	CYT	CYT	17.77	NUC	13.75	MIT	9.003	30.25
Q4U5R3	SP|Q4U5R3|PSME1_BOVIN	NUC	NUC	20.05	CYT	14.28	EXC	10.67	32.35
Q52QI2	SP|Q52QI2|RTL1_BOVIN	NUC	NUC	14.68	CYT	13.34	PLA	11.4	27.65
Q56JZ1	SP|Q56JZ1|RL13_BOVIN	CYT	CYT	20.95	NUC	18.94	EXC	11.04	39.09
Q58CP9	SP|Q58CP9|STIM1_BOVIN	NUC	NUC	16.66	CYT	15.46	END	11.24	31.73
Q58CQ5	SP|Q58CQ5|ANKZ1_BOVIN	NUC	NUC	18.66	CYT	14.62	PLA	13.18	31.93
Q58CR3	SP|Q58CR3|EIF2D_BOVIN	CYT	CYT	38.82	NUC	10.02	PLA	7.84	34.77
Q58CT4	SP|Q58CT4|MF13A_BOVIN	PLA	PLA	16.38	NUC	13.7	CYT	11.77	29.27
Q58D49	SP|Q58D49|MMAB_BOVIN	NUC	NUC	14.63	PLA	12.46	CYT	12.31	26.5
Q58D56	SP|Q58D56|DRG2_BOVIN	CYT	CYT	50.46	NUC	9.238	MIT	5.795	35.09
Q58D84	SP|Q58D84|FSTL1_BOVIN	EXC	EXC	42.47	PLA	9.274	CYT	9.037	34.57
Q58DA8	SP|Q58DA8|ZDHC9_BOVIN	END/GOL	END	31.64	GOL	31.6	NUC	7.279	63.21
Q58DH8	SP|Q58DH8|FEN1_BOVIN	NUC	NUC	17.67	MIT	13.16	CYT	12.03	29.44
Q58DK8	SP|Q58DK8|TRI38_BOVIN	CYT	CYT	17.09	NUC	12.78	PLA	11.98	28.58
Q58DL5	SP|Q58DL5|BCAR3_BOVIN	CYT	CYT	15.35	NUC	13.31	PLA	12.89	28.08
Q58DN4	SP|Q58DN4|PPME1_BOVIN	NUC	NUC	16.36	CYT	13.64	EXC	11.67	29.18
Q58DV7	SP|Q58DV7|HNMT_BOVIN	CYT	CYT	46.45	NUC	7.156	EXC	6.059	32.54
Q58DW6	SP|Q58DW6|RAB25_BOVIN	PLA	PLA	24.48	GOL	16.77	CYT	10.53	38.07
Q5BIM1	SP|Q5BIM1|TRI45_BOVIN	NUC	NUC	29.68	CYT	28.45	CSK	5.727	57.42
Q5BIR6	SP|Q5BIR6|MED17_BOVIN	NUC	NUC	17.08	CYT	13.49	CSK	9.07	29.47
Q5E958	SP|Q5E958|RS8_BOVIN	CYT	CYT	50.1	NUC	11.28	PLA	5.853	37.56
Q5E977	SP|Q5E977|F118B_BOVIN	NUC	NUC	13.88	PLA	13.52	CYT	12.81	27.29
Q5E9B6	SP|Q5E9B6|NR1H3_BOVIN	NUC	NUC	28.47	CYT	14.66	PLA	10.48	37.18
Q5E9F5	SP|Q5E9F5|TAGL2_BOVIN	PLA	PLA	14.18	CSK	11.76	MIT	11.46	25.31
Q5E9F9	SP|Q5E9F9|PRS7_BOVIN	CYT/NUC	CYT	40.5	NUC	40.02	MIT	3.336	80.13
Q5E9G0	SP|Q5E9G0|GSTA4_BOVIN	CYT	CYT	49.39	NUC	10.4	CSK	6.597	36.48
Q5E9G4	SP|Q5E9G4|TRI10_BOVIN	CYT	CYT	32.02	NUC	11.94	PLA	9.052	35.13
Q5E9H5	SP|Q5E9H5|BCS1_BOVIN	MIT	MIT	37.1	NUC	12	CYT	11.15	36.77
Q5E9H9	SP|Q5E9H9|ABHDA_BOVIN	PLA	PLA	12.7	CYT	12.29	NUC	11.08	24.89
Q5E9N5	SP|Q5E9N5|CLPB_BOVIN	CYT	CYT	15.82	NUC	14.18	PLA	12.97	29.5
Q5E9P5	SP|Q5E9P5|PAMR1_BOVIN	EXC	EXC	39.71	CYT	7.975	PLA	7.1	32.55
Q5E9R3	SP|Q5E9R3|EHD1_BOVIN	PLA	PLA	49.03	NUC	9.16	CYT	7.186	34.99
Q5E9T9	SP|Q5E9T9|RTCB_BOVIN	CYT	CYT	50	NUC	8.238	PLA	5.327	33.92
Q5E9V1	SP|Q5E9V1|DCNL3_BOVIN	NUC	NUC	15.9	PLA	12.12	EXC	11.88	26.97
Q5E9W5	SP|Q5E9W5|G3ST4_BOVIN	NUC	NUC	15.29	CYT	14.69	PLA	12.2	29.8
Q5EA06	SP|Q5EA06|GBRP_BOVIN	PLA/JNC	PLA	37.62	JNC	37.26	CYT	4.127	74.6
Q5EA28	SP|Q5EA28|CXXC1_BOVIN	NUC	NUC	42.93	PLA	9.47	CYT	9.216	34.87
Q5EA41	SP|Q5EA41|GALT6_BOVIN	GOL	GOL	23.28	EXC	12.78	CYT	9.697	32.28
Q5EA43	SP|Q5EA43|SFXN2_BOVIN	MIT	MIT	17.66	NUC	12.95	PLA	12.41	29.17
Q5EA53	SP|Q5EA53|T2FA_BOVIN	NUC	NUC	43.43	CYT	11.63	PLA	9.132	37.56
Q5EA77	SP|Q5EA77|SNX17_BOVIN	CYT	CYT	46.13	NUC	9.298	PLA	7.46	35.01
Q5EA88	SP|Q5EA88|GPDA_BOVIN	CYT	CYT	65.64	NUC	5.137	EXC	4.912	27.95
Q5EA98	SP|Q5EA98|MFAP1_BOVIN	EXC	EXC	39.78	NUC	15.95	CYT	10.4	42.45
Q5EAC9	SP|Q5EAC9|HSPB8_BOVIN	NUC/CYT	NUC	35.41	CYT	33.1	PLA	4.807	66.92
Q5XQN5	SP|Q5XQN5|K2C5_BOVIN	NUC	NUC	21.88	CYT	21.23	PLA	14.1	42.83
Q6TJY3	SP|Q6TJY3|KS6B1_BOVIN	CYT/NUC	CYT	34.47	NUC	34.17	PLA	6.866	68.44
Q6UC88	SP|Q6UC88|LYVE1_BOVIN	PLA	PLA	28.29	NUC	12.16	CYT	11.63	33.92
Q75WB5	SP|Q75WB5|OPLA_BOVIN	CYT	CYT	15.98	NUC	13.53	PLA	12.52	28.79
Q76BS1	SP|Q76BS1|HGF_BOVIN	EXC	EXC	24.53	CYT	9.655	NUC	9.054	29.1
Q862I1	SP|Q862I1|RL24_BOVIN	NUC	NUC	20.27	CYT	17.85	CSK	10.35	37.2
Q863B3	SP|Q863B3|SND1_BOVIN	CYT/NUC	CYT	39.56	NUC	31.38	PLA	3.936	65.14
Q865R3	SP|Q865R3|BASI_BOVIN	PLA	PLA	15.5	CYT	12.49	NUC	11.85	27.15
Q865S1	SP|Q865S1|AP3D1_BOVIN	NUC	NUC	19.23	CYT	13.73	PLA	10.93	31.14
Q865V6	SP|Q865V6|CAPG_BOVIN	NUC/CYT	NUC	30.66	CYT	30.27	CSK	7.998	60.7
Q866T7	SP|Q866T7|CXD2_BOVIN	JNC/PLA	JNC	40.32	PLA	40.19	NUC	4.5	80.41
Q8HXA6	SP|Q8HXA6|ASB15_BOVIN	NUC	NUC	14.09	CYT	12.74	PLA	9.449	26.46
Q8HYW0	SP|Q8HYW0|FA13A_BOVIN	NUC	NUC	18.14	CYT	15.94	PLA	12.3	33.34
Q8HYY4	SP|Q8HYY4|UACA_BOVIN	NUC	NUC	17.93	CYT	17.34	CSK	10.65	35.06
Q8MHZ9	SP|Q8MHZ9|CL46_BOVIN	EXC	EXC	52.36	PLA	10.65	NUC	7.795	36.73
Q8MI28	SP|Q8MI28|LBN_BOVIN	NUC	NUC	16.22	CYT	14.83	PLA	10.91	30.62
Q8MJ05	SP|Q8MJ05|RP1_BOVIN	CSK	CSK	15.16	NUC	13.92	CYT	11.9	28.73
Q8MJ24	SP|Q8MJ24|LOXL4_BOVIN	EXC	EXC	18.61	PLA	13	CYT	11	29.84
Q8MJG0	SP|Q8MJG0|R9BP_BOVIN	PLA	PLA	26.44	NUC	12.56	CYT	11.69	33.58
Q8SPJ1	SP|Q8SPJ1|PLAK_BOVIN	NUC	NUC	13.01	CYT	12.3	PLA	10.63	25.14
Q8SPX7	SP|Q8SPX7|CRYL1_BOVIN	CYT	CYT	24.72	NUC	16.28	PLA	11.58	37.55
Q8WMV0	SP|Q8WMV0|GRK7_BOVIN	PLA	PLA	41.73	CYT	11.5	NUC	10.32	37.14
Q8WN55	SP|Q8WN55|PTBP1_BOVIN	NUC	NUC	58.32	CYT	6.916	EXC	5.503	31.7
Q95119	SP|Q95119|TYRP2_BOVIN	PLA	PLA	14.34	EXC	11.34	CYT	11.33	24.91
Q95141	SP|Q95141|INAR2_BOVIN	PLA	PLA	52.58	EXC	8.154	CYT	6.855	33.75
Q95JC7	SP|Q95JC7|AAAT_BOVIN	PLA	PLA	29.16	CYT	11.16	NUC	11.09	33.06
Q95KV0	SP|Q95KV0|IKKB_BOVIN	CYT	CYT	40.42	NUC	15.11	CSK	6.776	41.48
Q95LA0	SP|Q95LA0|FATE1_BOVIN	CYT	CYT	15.07	NUC	12.81	PLA	11.35	27.26
Q95N27	SP|Q95N27|PP16B_BOVIN	CYT	CYT	16.27	NUC	15.04	PLA	10	30.92
Q9BE45	SP|Q9BE45|IKBZ_BOVIN	NUC	NUC	44.78	CYT	10.65	PLA	8.325	36.51
Q9BGI3	SP|Q9BGI3|PRDX2_BOVIN	CYT	CYT	50.9	EXC	10.18	MIT	9.74	36.2
Q9MZL3	SP|Q9MZL3|CACB3_BOVIN	PLA	PLA	37.19	CYT	10.86	NUC	10.71	35.4
Q9N285	SP|Q9N285|MTCH2_BOVIN	CYT	CYT	13.28	MIT	10.46	PLA	10.18	23.08
Q9TT93	SP|Q9TT93|ATS4_BOVIN	EXC	EXC	18.6	NUC	14.07	PLA	11.12	31.19
Q9TTA5	SP|Q9TTA5|SMAL1_BOVIN	NUC	NUC	17.79	CYT	15.11	PLA	12.85	32.02
Q9TTK8	SP|Q9TTK8|KCRU_BOVIN	MIT	MIT	50.1	CYT	19.48	CSK	8.337	48.28
Q9XSJ0	SP|Q9XSJ0|UCHL5_BOVIN	NUC/CYT	NUC	36.09	CYT	34.44	CSK	4.867	69.36
Q9XSJ4	SP|Q9XSJ4|ENOA_BOVIN	CYT	CYT	61.43	PLA	18.66	NUC	4.107	45.84
Q9XTA3	SP|Q9XTA3|MYOC_BOVIN	NUC	NUC	16.34	CYT	13.37	PLA	13.09	28.83
A0A0A8JC39	TR|A0A0A8JC39|A0A0A8JC39_BOVIN	NUC	NUC	31.93	CYT	28.65	PLA	7.082	58.59
A0A0H3U5V9	TR|A0A0H3U5V9|A0A0H3U5V9_BOSMU	NUC/CYT	NUC	34.76	CYT	30.37	EXC	6.573	62.27
A0A2V2	TR|A0A2V2|A0A2V2_BOVIN	EXC	EXC	26.59	PLA	15.15	NUC	13.83	36.97
A0JN55	TR|A0JN55|A0JN55_BOVIN	NUC	NUC	15.05	CYT	11.25	PLA	9.989	25.29
A0JN59	TR|A0JN59|A0JN59_BOVIN	NUC	NUC	15.45	CYT	15.26	PLA	11.62	30.66
A0JN63	TR|A0JN63|A0JN63_BOVIN	NUC	NUC	51.02	CYT	8.704	EXC	5.332	34.45
A0JN73	TR|A0JN73|A0JN73_BOVIN	CYT	CYT	13.76	NUC	13.17	PLA	10.18	26.77
A0JN78	TR|A0JN78|A0JN78_BOVIN	NUC	NUC	18	CYT	13.53	EXC	10.25	30.12
A0JNE9	TR|A0JNE9|A0JNE9_BOVIN	CYT	CYT	17.12	NUC	13.1	PLA	10.2	29
A0JNP9	TR|A0JNP9|A0JNP9_BOVIN	NUC	NUC	15.71	CYT	12.64	PLA	10.36	27.48
A0JNQ0	TR|A0JNQ0|A0JNQ0_BOVIN	CSK	CSK	53.09	NUC	9.852	CYT	6.591	35.73
A1A4I7	TR|A1A4I7|A1A4I7_BOVIN	PLA	PLA	39.85	NUC	8.195	CYT	7.973	32.84
A1A4I8	TR|A1A4I8|A1A4I8_BOVIN	NUC	NUC	13.34	CYT	13.26	PLA	12.28	26.58
A1A4P2	TR|A1A4P2|A1A4P2_BOVIN	PLA	PLA	28.99	CYT	13.72	EXC	9.863	36.19
A1A4R7	TR|A1A4R7|A1A4R7_BOVIN	CYT	CYT	54.02	NUC	9.355	EXC	5.947	35.07
A1L505	TR|A1L505|A1L505_BOVIN	NUC	NUC	20.48	CYT	15.69	PLA	13.69	34.44
A1L542	TR|A1L542|A1L542_BOVIN	CYT	CYT	14.09	NUC	13.6	END	12.63	27.55
A1L545	TR|A1L545|A1L545_BOVIN	NUC	NUC	27.63	CYT	26.14	PLA	8.212	52.97
A1L552	TR|A1L552|A1L552_BOVIN	NUC	NUC	16.15	PLA	15.56	CYT	14.98	31.52
A1L580	TR|A1L580|A1L580_BOVIN	PLA	PLA	54.54	EXC	6.261	CYT	6.247	31.45
A1L5A4	TR|A1L5A4|A1L5A4_BOVIN	NUC	NUC	18.64	CYT	13.74	PLA	10.34	30.8
A1L5C0	TR|A1L5C0|A1L5C0_BOVIN	PLA	PLA	20.65	JNC	15.76	NUC	10.1	34.62
A1XG22	TR|A1XG22|A1XG22_BOVIN	NUC/CYT	NUC	36.94	CYT	29.72	EXC	5.643	61.85
A2VDK7	TR|A2VDK7|A2VDK7_BOVIN	NUC	NUC	17.38	CYT	11.87	PLA	10.3	27.64
A2VDL0	TR|A2VDL0|A2VDL0_BOVIN	CYT	CYT	12.85	PLA	12.21	NUC	11.84	24.9
A2VDQ0	TR|A2VDQ0|A2VDQ0_BOVIN	CYT	CYT	15.16	NUC	14.06	CSK	10.95	28.9
A2VDQ3	TR|A2VDQ3|A2VDQ3_BOVIN	NUC	NUC	21.63	CYT	14.27	PLA	11.62	33.26
A2VDR7	TR|A2VDR7|A2VDR7_BOVIN	CYT	CYT	16.15	NUC	15.23	PLA	12.97	31.09
A2VDS7	TR|A2VDS7|A2VDS7_BOVIN	CYT	CYT	28.86	CSK	12.39	NUC	9.91	34.45
A2VDV1	TR|A2VDV1|A2VDV1_BOVIN	CYT	CYT	13.87	PLA	13.74	NUC	12.46	27.58
A2VE89	TR|A2VE89|A2VE89_BOVIN	EXC	EXC	65.82	PLA	4.676	NUC	4.32	27.39
A3KMV0	TR|A3KMV0|A3KMV0_BOVIN	NUC/CYT	NUC	33.91	CYT	32.29	END	4.664	65.13
A3KMV3	TR|A3KMV3|A3KMV3_BOVIN	NUC	NUC	41.51	CYT	14.99	PLA	8.282	41.52
A3KMV6	TR|A3KMV6|A3KMV6_BOVIN	NUC/CYT	NUC	35.96	CYT	34.32	CSK	4.34	69.12
A3KMW9	TR|A3KMW9|A3KMW9_BOVIN	NUC	NUC	42.67	CYT	9.209	PLA	6.529	34.52
A3KMX4	TR|A3KMX4|A3KMX4_BOVIN	NUC	NUC	16.71	CYT	15.89	PLA	11.92	32.33
A3KMX5	TR|A3KMX5|A3KMX5_BOVIN	PLA	PLA	65.76	GOL	5.458	END	3.559	28.27
A3KMY1	TR|A3KMY1|A3KMY1_BOVIN	CYT	CYT	19.61	NUC	16.86	PLA	9.731	35.47
A3KN01	TR|A3KN01|A3KN01_BOVIN	NUC	NUC	35.66	CYT	13.58	PLA	10.9	38.37
A3KN07	TR|A3KN07|A3KN07_BOVIN	NUC	NUC	22.18	CYT	19.18	PLA	8.479	40.12
A3KN30	TR|A3KN30|A3KN30_BOVIN	EXC	EXC	15.89	PLA	13.56	NUC	12.56	28.77
A3KN51	TR|A3KN51|A3KN51_BOVIN	NUC	NUC	14.97	CYT	14.74	PLA	10.54	29.64
A4FUB3	TR|A4FUB3|A4FUB3_BOVIN	NUC	NUC	46.08	CYT	10.87	PLA	6.125	36.89
A4FUC8	TR|A4FUC8|A4FUC8_BOVIN	CYT	CYT	40.91	NUC	10.2	PLA	7.033	35.42
A4FUD0	TR|A4FUD0|A4FUD0_BOVIN	CYT	CYT	43.64	MIT	15.14	NUC	9.847	42.03
A4FUD5	TR|A4FUD5|A4FUD5_BOVIN	CYT	CYT	28.97	NUC	15.9	PLA	10.78	39
A4FUD8	TR|A4FUD8|A4FUD8_BOVIN	NUC	NUC	46.88	CYT	7.306	PLA	6.815	32.74
A4FUE2	TR|A4FUE2|A4FUE2_BOVIN	CYT	CYT	18.83	NUC	16.75	PLA	12.5	34.85
A4FUE5	TR|A4FUE5|A4FUE5_BOVIN	CYT	CYT	50.23	NUC	8.499	PLA	5.897	34.22
A4FUF2	TR|A4FUF2|A4FUF2_BOVIN	END	END	44.5	CYT	7.621	NUC	7.506	32.9
A4FUX9	TR|A4FUX9|A4FUX9_BOVIN	GOL	GOL	40.82	NUC	9.576	CYT	9.441	34.65
A4FUY3	TR|A4FUY3|A4FUY3_BOVIN	END	END	25.79	EXC	25.16	NUC	8.876	50.62
A4FV01	TR|A4FV01|A4FV01_BOVIN	NUC	NUC	21.61	CYT	15.93	PLA	11.64	35.41
A4FV05	TR|A4FV05|A4FV05_BOVIN	EXC	EXC	27.25	PLA	17.43	NUC	12.68	40.29
A4FV11	TR|A4FV11|A4FV11_BOVIN	NUC	NUC	23.87	CYT	19.69	PLA	9.97	41.74
A4FV30	TR|A4FV30|A4FV30_BOVIN	NUC	NUC	18.04	PLA	14.84	CYT	12.87	31.82
A4FV36	TR|A4FV36|A4FV36_BOVIN	NUC	NUC	14.44	CYT	12.13	EXC	9.682	25.96
A4FV44	TR|A4FV44|A4FV44_BOVIN	CYT	CYT	15.7	NUC	14.72	CSK	11.4	30.13
A4FV70	TR|A4FV70|A4FV70_BOVIN	CYT	CYT	36.82	NUC	10.73	PLA	8.2	35.15
A4FV74	TR|A4FV74|A4FV74_BOVIN	NUC/CYT	NUC	32.75	CYT	32.73	PLA	5.853	65.46
A4FV92	TR|A4FV92|A4FV92_BOVIN	MIT	MIT	37.4	NUC	8.927	CYT	8.836	33.14
A4IF67	TR|A4IF67|A4IF67_BOVIN	NUC	NUC	28.68	CYT	16.95	PLA	9.246	40.27
A4IF71	TR|A4IF71|A4IF71_BOVIN	NUC	NUC	30.03	JNC	27.57	CYT	6.599	56.18
A4IF73	TR|A4IF73|A4IF73_BOVIN	NUC	NUC	22.22	CYT	16.02	PLA	13.56	35.88
A4IFA2	TR|A4IFA2|A4IFA2_BOVIN	CYT	CYT	37.04	PLA	9.808	NUC	8.459	34.09
A4IFB3	TR|A4IFB3|A4IFB3_BOVIN	NUC	NUC	17.61	CYT	13.02	PLA	12.68	29.22
A4IFE0	TR|A4IFE0|A4IFE0_BOVIN	NUC	NUC	17.08	CYT	15	CSK	10.37	31.42
A4IFE6	TR|A4IFE6|A4IFE6_BOVIN	CYT/MIT	CYT	36.93	MIT	30.82	NUC	9.809	63.62
A4IFF6	TR|A4IFF6|A4IFF6_BOVIN	CYT	CYT	17.58	NUC	17.57	PLA	9.99	35.14
A4IFH7	TR|A4IFH7|A4IFH7_BOVIN	CYT	CYT	19.57	NUC	14.99	PLA	11.42	32.98
A4IFH8	TR|A4IFH8|A4IFH8_BOVIN	PLA	PLA	18.51	NUC	11.91	CYT	11.84	28.42
A4IFK3	TR|A4IFK3|A4IFK3_BOVIN	CYT	CYT	24.22	CSK	20.22	NUC	14.02	42.66
A4IFL7	TR|A4IFL7|A4IFL7_BOVIN	NUC	NUC	15.29	CYT	14.13	PLA	12.87	29.08
A4IFR5	TR|A4IFR5|A4IFR5_BOVIN	NUC	NUC	16.33	CYT	15.48	PLA	11.76	31.54
A5D784	TR|A5D784|A5D784_BOVIN	NUC	NUC	12.45	CYT	11.37	EXC	10.57	23.56
A5D788	TR|A5D788|A5D788_BOVIN	END	END	38.13	NUC	8.008	CYT	7.867	32.24
A5D799	TR|A5D799|A5D799_BOVIN	CSK	CSK	10.74	CYT	10.56	END	10.44	21.26
A5D7A3	TR|A5D7A3|A5D7A3_BOVIN	CYT	CYT	50.5	NUC	7.013	EXC	5.349	32.5
A5D7A6	TR|A5D7A6|A5D7A6_BOVIN	NUC	NUC	38.82	CYT	12.34	CSK	8.121	37.61
A5D7B4	TR|A5D7B4|A5D7B4_BOVIN	NUC	NUC	18.05	CYT	14.91	PLA	12.26	31.93
A5D7C4	TR|A5D7C4|A5D7C4_BOVIN	NUC/CYT	NUC	34.16	CYT	33.79	PLA	5.47	67.7
A5D7C7	TR|A5D7C7|A5D7C7_BOVIN	NUC	NUC	15.19	CYT	14.9	PLA	11.31	30.01
A5D7D9	TR|A5D7D9|A5D7D9_BOVIN	NUC	NUC	59.08	CYT	8.18	PLA	5.27	33.02
A5D7E4	TR|A5D7E4|A5D7E4_BOVIN	NUC	NUC	47.92	CYT	7.494	PLA	5.505	33.01
A5D7E6	TR|A5D7E6|A5D7E6_BOVIN	PLA	PLA	39.07	CYT	8.025	EXC	7.245	32.47
A5D7H4	TR|A5D7H4|A5D7H4_BOVIN	NUC	NUC	27.4	CYT	22.54	PLA	9.023	47.52
A5D7J9	TR|A5D7J9|A5D7J9_BOVIN	NUC	NUC	20.24	CYT	16.27	PLA	13.34	35.06
A5D7K0	TR|A5D7K0|A5D7K0_BOVIN	CYT	CYT	45.84	NUC	10.28	EXC	6.833	36.16
A5D7L2	TR|A5D7L2|A5D7L2_BOVIN	CYT	CYT	28.11	PLA	26.66	NUC	9.532	53.98
A5D7L6	TR|A5D7L6|A5D7L6_BOVIN	PLA	PLA	32.3	GOL	12.77	CYT	10.22	36.26
A5D7M0	TR|A5D7M0|A5D7M0_BOVIN	NUC	NUC	52.82	CYT	7.771	PLA	7.013	33.29
A5D7M5	TR|A5D7M5|A5D7M5_BOVIN	PLA	PLA	20.24	NUC	11.2	CYT	9.681	28.59
A5D7M8	TR|A5D7M8|A5D7M8_BOVIN	NUC	NUC	16.19	CYT	15.52	PLA	13.27	31.5
A5D7N6	TR|A5D7N6|A5D7N6_BOVIN	NUC/CSK	NUC	31.25	CSK	30.82	CYT	8.546	61.8
A5D7P7	TR|A5D7P7|A5D7P7_BOVIN	MIT	MIT	31.83	PLA	14.94	NUC	7.988	38.88
A5D7Q6	TR|A5D7Q6|A5D7Q6_BOVIN	PLA	PLA	21.78	NUC	11.89	CYT	10.97	30.34
A5D7S1	TR|A5D7S1|A5D7S1_BOVIN	NUC	NUC	30.91	CYT	11.76	PLA	10.42	34.49
A5D7T6	TR|A5D7T6|A5D7T6_BOVIN	NUC	NUC	46.05	CYT	12.34	PLA	9.655	38.7
A5D7U7	TR|A5D7U7|A5D7U7_BOVIN	NUC	NUC	18.45	CYT	17.33	PLA	14.02	35.38
A5D982	TR|A5D982|A5D982_BOVIN	CYT	CYT	43.15	END	12.81	PLA	9.201	38.98
A5D986	TR|A5D986|A5D986_BOVIN	LYS	LYS	25.53	CYT	20.15	NUC	7.646	43.22
A5D9D7	TR|A5D9D7|A5D9D7_BOVIN	END	END	47.37	PLA	7.744	CYT	7.742	33.27
A5D9E0	TR|A5D9E0|A5D9E0_BOVIN	NUC	NUC	43.86	CYT	9.907	END	9.775	35.51
A5D9G1	TR|A5D9G1|A5D9G1_BOVIN	CYT	CYT	47.7	PLA	6.391	END	5.653	31.75
A5PJE5	TR|A5PJE5|A5PJE5_BOVIN	NUC	NUC	24.93	CYT	20.64	PLA	13.16	43.61
A5PJF9	TR|A5PJF9|A5PJF9_BOVIN	CYT	CYT	17.77	NUC	13.99	PLA	9.603	30.56
A5PJG2	TR|A5PJG2|A5PJG2_BOVIN	NUC	NUC	16.03	PLA	15.29	CYT	12.78	31.09
A5PJJ3	TR|A5PJJ3|A5PJJ3_BOVIN	EXC	EXC	13.18	PLA	12.92	CYT	10.64	26.03
A5PJL2	TR|A5PJL2|A5PJL2_BOVIN	PLA	PLA	63.62	NUC	5.843	CYT	5.414	29.33
A5PJL4	TR|A5PJL4|A5PJL4_BOVIN	NUC	NUC	30.41	CYT	18.03	PLA	10.3	42.45
A5PJP0	TR|A5PJP0|A5PJP0_BOVIN	NUC	NUC	14.82	CYT	13.97	GOL	11.26	28.54
A5PJQ8	TR|A5PJQ8|A5PJQ8_BOVIN	NUC	NUC	30.47	CYT	24.24	PLA	7.166	51.3
A5PJQ9	TR|A5PJQ9|A5PJQ9_BOVIN	NUC	NUC	16.68	CYT	13.7	GOL	9.767	29.48
A5PJT3	TR|A5PJT3|A5PJT3_BOVIN	NUC	NUC	15.27	CYT	13.94	PLA	11.26	28.82
A5PJT5	TR|A5PJT5|A5PJT5_BOVIN	NUC	NUC	14.62	CYT	12.85	PLA	10.24	26.98
A5PJT7	TR|A5PJT7|A5PJT7_BOVIN	EXC	EXC	32.38	CYT	10.11	NUC	9.654	33.03
A5PJT9	TR|A5PJT9|A5PJT9_BOVIN	CYT	CYT	13.42	EXC	12.72	NUC	11.41	25.95
A5PJU2	TR|A5PJU2|A5PJU2_BOVIN	NUC	NUC	15.55	CYT	13.39	PLA	10.8	28.31
A5PJX8	TR|A5PJX8|A5PJX8_BOVIN	NUC	NUC	14.71	PLA	13.43	CYT	13.08	27.78
A5PJZ4	TR|A5PJZ4|A5PJZ4_BOVIN	CYT	CYT	46.11	NUC	7.768	PLA	7.668	33.22
A5PK05	TR|A5PK05|A5PK05_BOVIN	PLA	PLA	16.3	NUC	14.68	CYT	14.46	30.47
A5PK11	TR|A5PK11|A5PK11_BOVIN	NUC	NUC	46.02	CYT	9.441	PLA	7.449	35.17
A5PK17	TR|A5PK17|A5PK17_BOVIN	NUC	NUC	23.39	CSK	18.35	CYT	12.96	39.63
A5PK42	TR|A5PK42|A5PK42_BOVIN	NUC	NUC	18.1	CYT	14.34	PLA	10.53	31.23
A5PKE5	TR|A5PKE5|A5PKE5_BOVIN	PLA	PLA	54.61	EXC	6.875	NUC	6.593	32.14
A5PKI9	TR|A5PKI9|A5PKI9_BOVIN	NUC	NUC	16.6	CSK	16.59	CYT	13.12	33.18
A5PKJ1	TR|A5PKJ1|A5PKJ1_BOVIN	PLA	PLA	11.83	NUC	10.94	EXC	10.42	22.57
A5PKJ3	TR|A5PKJ3|A5PKJ3_BOVIN	CYT/CSK	CYT	36.5	CSK	35.77	NUC	6.974	71.74
A5PKJ5	TR|A5PKJ5|A5PKJ5_BOVIN	CYT/NUC	CYT	30.56	NUC	30.27	PLA	7.098	60.65
A6H701	TR|A6H701|A6H701_BOVIN	PLA/JNC	PLA	32.8	JNC	31.57	CYT	6.16	63.57
A6H717	TR|A6H717|A6H717_BOVIN	CYT	CYT	21.44	NUC	15.12	PLA	11.39	34.25
A6H720	TR|A6H720|A6H720_BOVIN	CYT	CYT	29.7	END	27.78	NUC	7.793	56.38
A6H722	TR|A6H722|A6H722_BOVIN	END	END	34.54	NUC	9.178	CYT	8.225	32.63
A6H725	TR|A6H725|A6H725_BOVIN	NUC	NUC	18.83	PLA	15.99	CYT	14.65	33.83
A6H761	TR|A6H761|A6H761_BOVIN	NUC	NUC	41.97	CYT	9.246	MIT	7.031	34.46
A6H781	TR|A6H781|A6H781_BOVIN	NUC	NUC	14.19	CYT	14.03	PLA	13.68	28.17
A6H798	TR|A6H798|A6H798_BOVIN	NUC	NUC	20.14	CYT	12.92	PLA	11.41	30.67
A6H7B7	TR|A6H7B7|A6H7B7_BOVIN	NUC	NUC	43.63	CYT	16.84	PLA	11.37	44.27
A6H7C1	TR|A6H7C1|A6H7C1_BOVIN	NUC	NUC	51.65	CYT	7.001	PLA	6.699	32.46
A6H7D7	TR|A6H7D7|A6H7D7_BOVIN	CYT	CYT	14.59	NUC	14.47	PLA	10.32	29.03
A6H7G1	TR|A6H7G1|A6H7G1_BOVIN	CYT	CYT	14.16	NUC	12.71	CSK	10.33	26.48
A6H7G6	TR|A6H7G6|A6H7G6_BOVIN	NUC	NUC	12.79	CYT	12.24	CSK	11.87	24.9
A6H7G7	TR|A6H7G7|A6H7G7_BOVIN	PLA	PLA	58.15	CYT	5.847	JNC	4.827	30.53
A6H7G9	TR|A6H7G9|A6H7G9_BOVIN	PLA/JNC	PLA	32.47	JNC	30.15	NUC	6.194	61.17
A6H7J3	TR|A6H7J3|A6H7J3_BOVIN	CSK	CSK	55.58	CYT	7.241	NUC	5.82	32.45
A6QL51	TR|A6QL51|A6QL51_BOVIN	NUC	NUC	21.88	CYT	18.55	PLA	12.43	39.09
A6QL80	TR|A6QL80|A6QL80_BOVIN	CYT	CYT	46.02	NUC	10.08	PLA	9.708	35.93
A6QL95	TR|A6QL95|A6QL95_BOVIN	END	END	26.21	NUC	10.09	PLA	9.19	30.44
A6QL98	TR|A6QL98|A6QL98_BOVIN	PLA	PLA	37.49	NUC	13.94	CYT	9.867	39.31
A6QLB2	TR|A6QLB2|A6QLB2_BOVIN	NUC	NUC	44.9	CYT	14.04	PLA	7.269	40.75
A6QLB5	TR|A6QLB5|A6QLB5_BOVIN	NUC	NUC	17.93	CYT	14.89	PLA	14.68	31.83
A6QLC1	TR|A6QLC1|A6QLC1_BOVIN	CYT	CYT	31.61	NUC	14.27	PLA	8.021	37.92
A6QLD6	TR|A6QLD6|A6QLD6_BOVIN	CYT	CYT	18.55	CSK	17.51	PLA	12.84	35.69
A6QLF4	TR|A6QLF4|A6QLF4_BOVIN	NUC	NUC	18.66	CYT	15.25	PLA	14.69	32.76
A6QLK9	TR|A6QLK9|A6QLK9_BOVIN	POX	POX	51.18	NUC	8.446	CYT	7.281	34.15
A6QLL4	TR|A6QLL4|A6QLL4_BOVIN	NUC	NUC	36.2	CYT	9.799	PLA	8.437	33.85
A6QLQ4	TR|A6QLQ4|A6QLQ4_BOVIN	CYT	CYT	16.39	NUC	15.4	PLA	11.26	31.47
A6QLT3	TR|A6QLT3|A6QLT3_BOVIN	NUC	NUC	14.85	CYT	13.18	PLA	10.91	27.56
A6QLV1	TR|A6QLV1|A6QLV1_BOVIN	NUC	NUC	18.34	CYT	14.19	PLA	13.56	31.18
A6QLW0	TR|A6QLW0|A6QLW0_BOVIN	NUC	NUC	12.91	CYT	12.3	PLA	10.73	25.05
A6QLW1	TR|A6QLW1|A6QLW1_BOVIN	NUC	NUC	13.77	CYT	13.3	PLA	10.6	26.95
A6QLY3	TR|A6QLY3|A6QLY3_BOVIN	END	END	29.03	GOL	27.39	EXC	8.152	55.5
A6QM02	TR|A6QM02|A6QM02_BOVIN	NUC	NUC	14.42	PLA	12.93	CYT	12.27	26.94
A6QNJ8	TR|A6QNJ8|A6QNJ8_BOVIN	PLA	PLA	12.02	NUC	11.22	END	10.75	23.05
A6QNL4	TR|A6QNL4|A6QNL4_BOVIN	NUC	NUC	40.88	CYT	20.52	PLA	5.438	48.9
A6QNQ0	TR|A6QNQ0|A6QNQ0_BOVIN	NUC	NUC	50.87	CYT	7.281	PLA	5.942	32.8
A6QNR7	TR|A6QNR7|A6QNR7_BOVIN	PLA	PLA	16.12	CYT	12.25	NUC	11.88	27.27
A6QNS2	TR|A6QNS2|A6QNS2_BOVIN	CYT	CYT	38.31	NUC	12.78	PLA	9.614	38.05
A6QNW5	TR|A6QNW5|A6QNW5_BOVIN	NUC	NUC	17.29	CYT	13.72	PLA	12.86	29.91
A6QNW9	TR|A6QNW9|A6QNW9_BOVIN	PLA	PLA	17.24	CYT	16.51	NUC	14.39	33.5
A6QNY0	TR|A6QNY0|A6QNY0_BOVIN	NUC	NUC	28.01	CYT	13.64	PLA	10.3	35.66
A6QP00	TR|A6QP00|A6QP00_BOVIN	CYT	CYT	25.55	NUC	14.15	PLA	9.189	35.17
A6QP09	TR|A6QP09|A6QP09_BOVIN	NUC	NUC	14.56	CYT	13.35	EXC	10.82	27.57
A6QP44	TR|A6QP44|A6QP44_BOVIN	CYT	CYT	13.68	PLA	13.48	NUC	12.3	27.1
A6QP71	TR|A6QP71|A6QP71_BOVIN	PLA	PLA	37.62	NUC	11.8	CYT	9.92	36.65
A6QP89	TR|A6QP89|A6QP89_BOVIN	NUC	NUC	15.71	CYT	13.58	PLA	11.35	28.66
A6QP90	TR|A6QP90|A6QP90_BOVIN	NUC	NUC	19.19	CYT	17.26	CSK	10	35.75
A6QP99	TR|A6QP99|A6QP99_BOVIN	NUC	NUC	18.66	CYT	15.54	CSK	9.818	33.14
A6QPA4	TR|A6QPA4|A6QPA4_BOVIN	EXC	EXC	31.6	CYT	27.6	PLA	7.072	56.83
A6QPG6	TR|A6QPG6|A6QPG6_BOVIN	NUC	NUC	15.58	CYT	14.49	CSK	9.28	29.74
A6QPL7	TR|A6QPL7|A6QPL7_BOVIN	NUC	NUC	19.59	PLA	14.55	CYT	12.81	32.42
A6QPM5	TR|A6QPM5|A6QPM5_BOVIN	NUC	NUC	15.5	CYT	15.06	PLA	13.23	30.42
A6QPP2	TR|A6QPP2|A6QPP2_BOVIN	NUC	NUC	14.56	CYT	14.19	EXC	13.28	28.65
A6QPQ1	TR|A6QPQ1|A6QPQ1_BOVIN	PLA	PLA	16.88	NUC	16.21	CYT	14.69	32.87
A6QPR1	TR|A6QPR1|A6QPR1_BOVIN	LYS	LYS	22.63	CYT	10.7	EXC	10.07	29.36
A6QPR4	TR|A6QPR4|A6QPR4_BOVIN	NUC	NUC	18.22	CYT	16.13	PLA	14.69	33.63
A6QPS6	TR|A6QPS6|A6QPS6_BOVIN	PLA	PLA	16.34	NUC	13.2	EXC	13.02	28.61
A6QPT1	TR|A6QPT1|A6QPT1_BOVIN	NUC	NUC	20.24	CYT	14.33	PLA	13.04	32.53
A6QPT4	TR|A6QPT4|A6QPT4_BOVIN	LYS	LYS	32.63	CYT	17.08	EXC	11.11	41.98
A6QPT9	TR|A6QPT9|A6QPT9_BOVIN	NUC	NUC	18.45	PLA	13.76	CYT	11.84	30.7
A6QPU2	TR|A6QPU2|A6QPU2_BOVIN	CYT	CYT	17.16	NUC	15.29	PLA	12.69	31.84
A6QPV0	TR|A6QPV0|A6QPV0_BOVIN	EXC	EXC	25.16	PLA	13.63	CYT	9.506	34.32
A6QPV4	TR|A6QPV4|A6QPV4_BOVIN	NUC	NUC	15.56	CYT	15.07	PLA	10.98	30.48
A6QPY1	TR|A6QPY1|A6QPY1_BOVIN	CYT	CYT	13.98	NUC	13.67	PLA	12.63	27.56
A6QPZ7	TR|A6QPZ7|A6QPZ7_BOVIN	POX	POX	33.87	CYT	9.544	NUC	8.656	32.85
A6QQ44	TR|A6QQ44|A6QQ44_BOVIN	NUC	NUC	16.61	PLA	16.07	CYT	12.72	32.5
A6QQ54	TR|A6QQ54|A6QQ54_BOVIN	MIT	MIT	48.08	NUC	6.87	EXC	6.622	32.31
A6QQ63	TR|A6QQ63|A6QQ63_BOVIN	NUC	NUC	14.76	CYT	12.93	PLA	12.74	27.18
A6QQM3	TR|A6QQM3|A6QQM3_BOVIN	NUC	NUC	15.42	CYT	14.62	PLA	10.45	29.8
A6QQN9	TR|A6QQN9|A6QQN9_BOVIN	NUC	NUC	39.42	CYT	18.99	PLA	7.706	46.48
A6QQP0	TR|A6QQP0|A6QQP0_BOVIN	NUC	NUC	55.73	CYT	7.738	MIT	5.7	33.01
A6QQU3	TR|A6QQU3|A6QQU3_BOVIN	PLA	PLA	14.06	CYT	11.29	NUC	9.605	24.65
A6QQV8	TR|A6QQV8|A6QQV8_BOVIN	NUC	NUC	36.18	END	11.12	PLA	11.06	35.45
A6QQW3	TR|A6QQW3|A6QQW3_BOVIN	NUC/CYT	NUC	32.17	CYT	31.5	PLA	6.371	63.25
A6QQX0	TR|A6QQX0|A6QQX0_BOVIN	NUC	NUC	18.3	CYT	16.29	PLA	9.439	33.9
A6QQX2	TR|A6QQX2|A6QQX2_BOVIN	NUC	NUC	34.09	CYT	9.227	PLA	7.741	32.55
A6QQZ2	TR|A6QQZ2|A6QQZ2_BOVIN	CSK	CSK	44.66	NUC	10.23	CYT	8.809	35.99
A6QQZ4	TR|A6QQZ4|A6QQZ4_BOVIN	NUC	NUC	13.65	CYT	13.33	PLA	10.34	26.89
A6QR12	TR|A6QR12|A6QR12_BOVIN	MIT	MIT	41.04	CYT	9.984	NUC	9.118	35.18
A6QR19	TR|A6QR19|A6QR19_BOVIN	CYT	CYT	60.51	PLA	15.63	NUC	4.203	41.97
A6QR27	TR|A6QR27|A6QR27_BOVIN	NUC	NUC	17.99	PLA	15.76	CYT	15.64	32.99
A6QR33	TR|A6QR33|A6QR33_BOVIN	LYS	LYS	40.74	NUC	8.466	CYT	8.152	33.33
A6QR34	TR|A6QR34|A6QR34_BOVIN	MIT	MIT	19.07	NUC	12.18	CYT	10.65	29.09
A6QR47	TR|A6QR47|A6QR47_BOVIN	NUC	NUC	18.82	CYT	13.95	PLA	13.5	31.17
A6QR49	TR|A6QR49|A6QR49_BOVIN	MIT	MIT	59.4	PLA	6.025	NUC	5.21	30.51
A6QR61	TR|A6QR61|A6QR61_BOVIN	CYT	CYT	15.84	MIT	12.67	PLA	12.4	27.6
A7E301	TR|A7E301|A7E301_BOVIN	NUC	NUC	17.5	PLA	14.28	CYT	14.08	30.76
A7E302	TR|A7E302|A7E302_BOVIN	NUC	NUC	18.17	CYT	13.6	PLA	12.37	30.32
A7E306	TR|A7E306|A7E306_BOVIN	EXC	EXC	38.58	PLA	9.904	NUC	9.497	34.58
A7E357	TR|A7E357|A7E357_BOVIN	NUC	NUC	52.53	CYT	8.997	PLA	6.836	34.74
A7E398	TR|A7E398|A7E398_BOVIN	CYT/NUC	CYT	31.09	NUC	30.69	CSK	6.737	61.53
A7E3S8	TR|A7E3S8|A7E3S8_BOVIN	CYT	CYT	38.97	NUC	12.66	EXC	7.866	38.04
A7E3U1	TR|A7E3U1|A7E3U1_BOVIN	NUC/CYT	NUC	32.71	CYT	30.23	CSK	5.733	61.38
A7E3V3	TR|A7E3V3|A7E3V3_BOVIN	MIT	MIT	30.41	NUC	12.93	CYT	10.78	35.77
A7MAY9	TR|A7MAY9|A7MAY9_BOVIN	NUC	NUC	18.85	CYT	13.07	PLA	12.25	30.08
A7MB01	TR|A7MB01|A7MB01_BOVIN	NUC	NUC	31.06	CYT	28.81	PLA	6.572	58.52
A7MB02	TR|A7MB02|A7MB02_BOVIN	NUC	NUC	15.22	GOL	13.72	PLA	12.81	28.51
A7MB14	TR|A7MB14|A7MB14_BOVIN	NUC	NUC	20.95	CYT	16.23	PLA	12.43	35.42
A7MB24	TR|A7MB24|A7MB24_BOVIN	CYT	CYT	29.53	CSK	26.87	NUC	9.716	54.91
A7MB29	TR|A7MB29|A7MB29_BOVIN	CYT	CYT	16.46	PLA	12.05	NUC	11.03	27.26
A7MB30	TR|A7MB30|A7MB30_BOVIN	NUC	NUC	29.35	PLA	29.27	CYT	11.51	58.56
A7MB37	TR|A7MB37|A7MB37_BOVIN	NUC	NUC	43.72	CYT	9.256	PLA	8.017	34.72
A7MB38	TR|A7MB38|A7MB38_BOVIN	NUC	NUC	43.33	CYT	14.25	PLA	11.89	40.84
A7MB61	TR|A7MB61|A7MB61_BOVIN	NUC	NUC	42.3	CYT	9.127	PLA	8.909	34.37
A7MB85	TR|A7MB85|A7MB85_BOVIN	NUC	NUC	14.33	CYT	13.11	PLA	12.45	27.1
A7MB94	TR|A7MB94|A7MB94_BOVIN	CSK	CSK	34.73	NUC	13.03	CYT	10.07	37.4
A7MBA6	TR|A7MBA6|A7MBA6_BOVIN	END	END	21.36	GOL	20.63	NUC	11.89	41.69
A7MBB2	TR|A7MBB2|A7MBB2_BOVIN	CYT	CYT	30.92	NUC	11.42	PLA	11.4	34.08
A7MBB7	TR|A7MBB7|A7MBB7_BOVIN	NUC	NUC	31.5	CYT	29.09	PLA	8.02	59.13
A7MBC4	TR|A7MBC4|A7MBC4_BOVIN	NUC	NUC	41.75	CYT	10.22	PLA	7.775	35.58
A7MBE1	TR|A7MBE1|A7MBE1_BOVIN	NUC	NUC	17.53	CYT	17.41	PLA	12.22	34.9
A7MBE2	TR|A7MBE2|A7MBE2_BOVIN	NUC	NUC	15.3	CYT	13.56	MIT	10.36	28.35
A7MBF4	TR|A7MBF4|A7MBF4_BOVIN	CYT	CYT	15.23	NUC	11.96	PLA	10.68	26.31
A7MBF8	TR|A7MBF8|A7MBF8_BOVIN	NUC	NUC	29.24	CYT	27.93	PLA	7.007	56.42
A7MBG5	TR|A7MBG5|A7MBG5_BOVIN	NUC	NUC	15.37	CYT	13.92	PLA	12.39	28.86
A7MBJ3	TR|A7MBJ3|A7MBJ3_BOVIN	END/EXC	END	31.17	EXC	30.59	PLA	5.675	61.4
A7MBJ6	TR|A7MBJ6|A7MBJ6_BOVIN	NUC	NUC	14.14	CYT	12.74	PLA	10.96	26.5
A7MBK3	TR|A7MBK3|A7MBK3_BOVIN	CYT	CYT	29.08	PLA	24.96	NUC	9.302	51.82
A7YW25	TR|A7YW25|A7YW25_BOVIN	CYT	CYT	18.19	NUC	17.34	PLA	11.6	35.23
A7YW37	TR|A7YW37|A7YW37_BOVIN	NUC	NUC	14.43	PLA	13.43	CYT	12.31	27.59
A7YWC6	TR|A7YWC6|A7YWC6_BOVIN	NUC	NUC	48.79	CYT	11.44	PLA	8.559	37.73
A7YWC7	TR|A7YWC7|A7YWC7_BOVIN	CYT	CYT	15.71	CSK	10.86	NUC	10.8	25.28
A7YWD0	TR|A7YWD0|A7YWD0_BOVIN	NUC/CYT	NUC	35.72	CYT	33.59	MIT	3.952	67.83
A7YWK8	TR|A7YWK8|A7YWK8_BOVIN	NUC	NUC	16.34	CYT	11.97	PLA	11.83	27.07
A7YWN9	TR|A7YWN9|A7YWN9_BOVIN	PLA	PLA	46.98	NUC	7.353	CYT	6.86	32.8
A7YWT7	TR|A7YWT7|A7YWT7_BOVIN	NUC	NUC	36.98	CYT	13.97	EXC	7.349	39.23
A7YY63	TR|A7YY63|A7YY63_BOVIN	NUC	NUC	18.46	CYT	15.23	PLA	11.15	32.61
A7Z023	TR|A7Z023|A7Z023_BOVIN	NUC	NUC	15.17	PLA	12.48	CYT	12.21	26.91
A7Z024	TR|A7Z024|A7Z024_BOVIN	PLA	PLA	42.41	NUC	7.423	EXC	6.441	32.4
A7Z025	TR|A7Z025|A7Z025_BOVIN	NUC	NUC	52.94	CYT	6.196	EXC	5.065	31.49
A7Z029	TR|A7Z029|A7Z029_BOVIN	PLA	PLA	25.8	NUC	11.9	CYT	11.32	32.46
A7Z030	TR|A7Z030|A7Z030_BOVIN	NUC	NUC	51.29	CYT	6.944	PLA	5.596	32.41
A7Z038	TR|A7Z038|A7Z038_BOVIN	POX	POX	57.97	PLA	6.649	CYT	5.593	31.46
A7Z042	TR|A7Z042|A7Z042_BOVIN	CYT	CYT	18.15	PLA	17.66	NUC	13.25	35.64
A7Z055	TR|A7Z055|A7Z055_BOVIN	NUC	NUC	14.52	CYT	14.52	PLA	10.25	29.04
A7Z060	TR|A7Z060|A7Z060_BOVIN	NUC	NUC	16.95	CYT	13.9	CSK	9.982	29.91
A7Z062	TR|A7Z062|A7Z062_BOVIN	NUC	NUC	16.52	CYT	11.2	PLA	10.86	26.25
A7Z068	TR|A7Z068|A7Z068_BOVIN	NUC	NUC	18.74	CYT	15.71	PLA	12.37	33.4
A7Z073	TR|A7Z073|A7Z073_BOVIN	PLA	PLA	37.57	NUC	14.85	CYT	11.36	40.51
A7Z075	TR|A7Z075|A7Z075_BOVIN	NUC	NUC	47.96	CYT	11.77	PLA	9.963	38.12
A7Z088	TR|A7Z088|A7Z088_BOVIN	NUC	NUC	17.86	CYT	15.1	PLA	12.66	32.06
A8E4P2	TR|A8E4P2|A8E4P2_BOVIN	CYT	CYT	13.81	NUC	12.12	MIT	10.83	25.49
A8E646	TR|A8E646|A8E646_BOVIN	CYT	CYT	38.89	NUC	12.1	CSK	7.335	37.32
A8E658	TR|A8E658|A8E658_BOVIN	NUC	NUC	43	CYT	12.58	PLA	9.153	38.67
A8KC65	TR|A8KC65|A8KC65_BOVIN	PLA	PLA	65.85	NUC	5.055	CYT	4.591	27.8
B1H0W5	TR|B1H0W5|B1H0W5_BOVIN	EXC	EXC	40.76	NUC	10.45	CYT	9.632	35.69
B9X245	TR|B9X245|B9X245_BOVIN	EXC	EXC	40.44	NUC	8.183	CYT	7.651	32.94
D3JUI8	TR|D3JUI8|D3JUI8_BOVIN	NUC	NUC	55.27	CYT	10.19	PLA	6.864	35.96
D5KB40	TR|D5KB40|D5KB40_BOVIN	PLA	PLA	33.28	CYT	22.61	NUC	9.234	49.93
D5KB43	TR|D5KB43|D5KB43_BOVIN	NUC	NUC	15.53	PLA	12.24	CYT	12.13	26.85
E1B6X8	TR|E1B6X8|E1B6X8_BOVIN	NUC	NUC	21.21	CYT	18.86	PLA	9.951	39.13
E1B6Y9	TR|E1B6Y9|E1B6Y9_BOVIN	PLA	PLA	37.23	CYT	9.471	NUC	8.683	33.74
E1B6Z2	TR|E1B6Z2|E1B6Z2_BOVIN	NUC	NUC	31.21	CYT	13.84	PLA	11.16	37.23
E1B6Z5	TR|E1B6Z5|E1B6Z5_BOVIN	NUC	NUC	37.36	CYT	11.39	PLA	9.315	36.09
E1B710	TR|E1B710|E1B710_BOVIN	NUC	NUC	27.03	PLA	14.5	CYT	13.4	36.32
E1B714	TR|E1B714|E1B714_BOVIN	NUC	NUC	16.46	CYT	14.74	PLA	12.15	30.67
E1B715	TR|E1B715|E1B715_BOVIN	NUC	NUC	15.79	CYT	14.74	CSK	12.76	30.2
E1B729	TR|E1B729|E1B729_BOVIN	NUC	NUC	17.07	CYT	14.2	EXC	10.48	30.38
E1B740	TR|E1B740|E1B740_BOVIN	NUC	NUC	17.47	CYT	15.02	PLA	13.87	31.69
E1B741	TR|E1B741|E1B741_BOVIN	NUC	NUC	38.82	CYT	9.866	PLA	7.52	34.59
E1B748	TR|E1B748|E1B748_BOVIN	END	END	50.88	NUC	8.099	CYT	7.615	33.75
E1B760	TR|E1B760|E1B760_BOVIN	PLA	PLA	55.67	NUC	8.149	CYT	7.377	33.49
E1B783	TR|E1B783|E1B783_BOVIN	NUC	NUC	13.79	CYT	13.56	PLA	13.07	27.29
E1B793	TR|E1B793|E1B793_BOVIN	NUC	NUC	26.68	CYT	25.35	PLA	9.819	51.34
E1B796	TR|E1B796|E1B796_BOVIN	NUC	NUC	16.3	CYT	14.01	PLA	11.87	29.62
E1B7A1	TR|E1B7A1|E1B7A1_BOVIN	NUC	NUC	45.61	CYT	8.15	PLA	7.207	33.62
E1B7B1	TR|E1B7B1|E1B7B1_BOVIN	END	END	49.01	NUC	9.567	CYT	7.607	35.47
E1B7B9	TR|E1B7B9|E1B7B9_BOVIN	END	END	48.82	NUC	7.869	CYT	7.538	33.47
E1B7C1	TR|E1B7C1|E1B7C1_BOVIN	PLA	PLA	26.94	NUC	14.65	CYT	12.71	36.48
E1B7E1	TR|E1B7E1|E1B7E1_BOVIN	PLA	PLA	18.77	NUC	10.84	CYT	10.13	27.26
E1B7E3	TR|E1B7E3|E1B7E3_BOVIN	CYT	CYT	27.26	GOL	22.21	NUC	12.08	46.97
E1B7G5	TR|E1B7G5|E1B7G5_BOVIN	NUC	NUC	13.73	PLA	11.13	CYT	10.81	24.21
E1B7G6	TR|E1B7G6|E1B7G6_BOVIN	NUC	NUC	15.5	CYT	13.74	PLA	12.18	28.72
E1B7H2	TR|E1B7H2|E1B7H2_BOVIN	EXC	EXC	38.58	PLA	14.01	NUC	10.42	39.67
E1B7H4	TR|E1B7H4|E1B7H4_BOVIN	PLA	PLA	15.95	CYT	14.86	NUC	14.82	30.47
E1B7I9	TR|E1B7I9|E1B7I9_BOVIN	PLA	PLA	44.5	NUC	11.68	CYT	8.584	37.74
E1B7J3	TR|E1B7J3|E1B7J3_BOVIN	CYT	CYT	29.94	NUC	27.44	PLA	9.348	55.95
E1B7K0	TR|E1B7K0|E1B7K0_BOVIN	LYS	LYS	34.45	PLA	8.488	NUC	8.212	31.79
E1B7K5	TR|E1B7K5|E1B7K5_BOVIN	NUC	NUC	16.09	CYT	15.5	PLA	10.43	31.4
E1B7K6	TR|E1B7K6|E1B7K6_BOVIN	CYT	CYT	15.5	PLA	14.3	NUC	12.12	29.44
E1B7Q0	TR|E1B7Q0|E1B7Q0_BOVIN	CYT	CYT	18.88	NUC	16.37	CSK	12.93	34.37
E1B7Q3	TR|E1B7Q3|E1B7Q3_BOVIN	EXC	EXC	47.65	CYT	7.674	NUC	7.663	33.21
E1B7Q4	TR|E1B7Q4|E1B7Q4_BOVIN	CSK	CSK	40.26	CYT	7.764	NUC	7.024	32.42
E1B7Q6	TR|E1B7Q6|E1B7Q6_BOVIN	NUC	NUC	43	CYT	10.82	PLA	8.865	36.5
E1B7R0	TR|E1B7R0|E1B7R0_BOVIN	CYT	CYT	15.77	NUC	13.61	PLA	9.554	28.74
E1B7T1	TR|E1B7T1|E1B7T1_BOVIN	CYT	CYT	29.52	CSK	26.75	NUC	11.63	54.71
E1B7U8	TR|E1B7U8|E1B7U8_BOVIN	NUC	NUC	16.58	CYT	13.53	PLA	12.36	29.19
E1B7X2	TR|E1B7X2|E1B7X2_BOVIN	NUC	NUC	14.99	CYT	12.18	PLA	11.29	26.41
E1B7Y3	TR|E1B7Y3|E1B7Y3_BOVIN	JNC	JNC	34.48	NUC	12.07	CYT	10.88	36.12
E1B7Z0	TR|E1B7Z0|E1B7Z0_BOVIN	CYT	CYT	33.61	PLA	22.24	NUC	22.06	49.5
E1B800	TR|E1B800|E1B800_BOVIN	PLA	PLA	18.94	CYT	18.76	NUC	12.38	37.64
E1B801	TR|E1B801|E1B801_BOVIN	CYT	CYT	16.53	NUC	14.53	PLA	14.17	30.44
E1B810	TR|E1B810|E1B810_BOVIN	NUC	NUC	18	CYT	14.75	PLA	11.62	31.68
E1B820	TR|E1B820|E1B820_BOVIN	NUC	NUC	15.22	CYT	13.44	PLA	10.89	28.15
E1B842	TR|E1B842|E1B842_BOVIN	NUC	NUC	50.28	CYT	11.68	PLA	6.012	38.04
E1B847	TR|E1B847|E1B847_BOVIN	PLA	PLA	33.61	NUC	14.35	CYT	11.1	38.72
E1B863	TR|E1B863|E1B863_BOVIN	PLA	PLA	33.95	EXC	12.34	NUC	9.73	36.28
E1B864	TR|E1B864|E1B864_BOVIN	PLA	PLA	43.61	NUC	8.37	CYT	8.219	33.66
E1B885	TR|E1B885|E1B885_BOVIN	CYT	CYT	14.04	NUC	14	PLA	10.53	28.02
E1B886	TR|E1B886|E1B886_BOVIN	NUC	NUC	17.63	CYT	15.42	PLA	12.12	32.32
E1B887	TR|E1B887|E1B887_BOVIN	CYT	CYT	20.11	NUC	14.75	CSK	9.255	33
E1B899	TR|E1B899|E1B899_BOVIN	NUC	NUC	12.48	PLA	11.44	CYT	10.57	23.67
E1B8A6	TR|E1B8A6|E1B8A6_BOVIN	CYT	CYT	19.21	NUC	18.98	EXC	11.04	38.11
E1B8B1	TR|E1B8B1|E1B8B1_BOVIN	CYT	CYT	16.52	NUC	16.36	PLA	11.85	32.83
E1B8C2	TR|E1B8C2|E1B8C2_BOVIN	NUC	NUC	27.42	CYT	13.64	PLA	10.5	35.4
E1B8D2	TR|E1B8D2|E1B8D2_BOVIN	NUC	NUC	15.01	CYT	12.94	PLA	12.67	27.37
E1B8E6	TR|E1B8E6|E1B8E6_BOVIN	NUC	NUC	46.56	CYT	12.13	PLA	6.252	38.49
E1B8G3	TR|E1B8G3|E1B8G3_BOVIN	NUC	NUC	13.41	CYT	12.86	PLA	9.703	26.12
E1B8J7	TR|E1B8J7|E1B8J7_BOVIN	END	END	36.28	NUC	11.31	CYT	10.05	35.7
E1B8K5	TR|E1B8K5|E1B8K5_BOVIN	NUC	NUC	14.3	MIT	13.71	PLA	11.96	27.84
E1B8M0	TR|E1B8M0|E1B8M0_BOVIN	CSK	CSK	26.66	NUC	16.17	CYT	14.25	38.34
E1B8M5	TR|E1B8M5|E1B8M5_BOVIN	END	END	30.19	NUC	9.744	PLA	9.015	31.77
E1B8P1	TR|E1B8P1|E1B8P1_BOVIN	NUC	NUC	14.6	PLA	14.16	CYT	12.53	28.64
E1B8R5	TR|E1B8R5|E1B8R5_BOVIN	NUC	NUC	18.46	CYT	17.24	PLA	12.45	35.27
E1B8R9	TR|E1B8R9|E1B8R9_BOVIN	PLA	PLA	11.72	CYT	11.48	NUC	10.31	23.14
E1B8S1	TR|E1B8S1|E1B8S1_BOVIN	NUC	NUC	15.3	CYT	14.55	PLA	12.95	29.63
E1B8S3	TR|E1B8S3|E1B8S3_BOVIN	EXC	EXC	15.38	NUC	11.26	PLA	10.13	25.54
E1B8T3	TR|E1B8T3|E1B8T3_BOVIN	NUC	NUC	41.55	CYT	10.91	PLA	9.19	36.39
E1B8U6	TR|E1B8U6|E1B8U6_BOVIN	END	END	58.32	NUC	6.748	CYT	5.78	31.51
E1B8W1	TR|E1B8W1|E1B8W1_BOVIN	NUC	NUC	17.96	CYT	14.19	PLA	12.78	30.94
E1B8X8	TR|E1B8X8|E1B8X8_BOVIN	NUC	NUC	15.46	CYT	12.63	PLA	10.31	27.29
E1B8Z0	TR|E1B8Z0|E1B8Z0_BOVIN	NUC	NUC	24.14	CYT	18.29	PLA	9.546	39.95
E1B8Z7	TR|E1B8Z7|E1B8Z7_BOVIN	NUC	NUC	50.3	CYT	10.49	PLA	6.546	36.59
E1B905	TR|E1B905|E1B905_BOVIN	JNC	JNC	43.07	NUC	8.535	CYT	8.426	33.78
E1B906	TR|E1B906|E1B906_BOVIN	CYT	CYT	13.72	NUC	12.71	PLA	12.43	26.16
E1B925	TR|E1B925|E1B925_BOVIN	NUC	NUC	40.58	CYT	10.71	PLA	9.554	35.97
E1B928	TR|E1B928|E1B928_BOVIN	NUC	NUC	18.81	CYT	14.76	PLA	13.92	32.21
E1B944	TR|E1B944|E1B944_BOVIN	CYT	CYT	13.23	NUC	12.71	PLA	11.35	25.8
E1B949	TR|E1B949|E1B949_BOVIN	PLA	PLA	18.75	NUC	11.98	CYT	10.48	28.66
E1B991	TR|E1B991|E1B991_BOVIN	NUC	NUC	23.69	CYT	20.13	PLA	15.29	42.26
E1B992	TR|E1B992|E1B992_BOVIN	NUC	NUC	37.93	CYT	17.77	LYS	5.369	44.47
E1B993	TR|E1B993|E1B993_BOVIN	CYT	CYT	14.92	NUC	14.42	EXC	9.782	29.19
E1B9D3	TR|E1B9D3|E1B9D3_BOVIN	PLA	PLA	26.3	NUC	12.42	CYT	10.68	33.34
E1B9D9	TR|E1B9D9|E1B9D9_BOVIN	CYT	CYT	42.41	NUC	9.671	PLA	7.981	35.03
E1B9E4	TR|E1B9E4|E1B9E4_BOVIN	CYT/PLA	CYT	33.33	PLA	32.67	NUC	5.864	65.57
E1B9F8	TR|E1B9F8|E1B9F8_BOVIN	NUC	NUC	16.15	PLA	13.1	CYT	12.68	28.35
E1B9F9	TR|E1B9F9|E1B9F9_BOVIN	CYT	CYT	28.51	CSK	27.6	NUC	11.02	55.59
E1B9H1	TR|E1B9H1|E1B9H1_BOVIN	EXC	EXC	42.4	PLA	8.627	NUC	7.079	33.79
E1B9I8	TR|E1B9I8|E1B9I8_BOVIN	PLA	PLA	20.2	NUC	17.2	EXC	10.78	36.28
E1B9I9	TR|E1B9I9|E1B9I9_BOVIN	NUC	NUC	14.28	CYT	14.05	PLA	13.19	28.26
E1B9K3	TR|E1B9K3|E1B9K3_BOVIN	PLA	PLA	64.66	CYT	5.185	NUC	4.755	28.3
E1B9K4	TR|E1B9K4|E1B9K4_BOVIN	EXC	EXC	24.16	PLA	13.32	NUC	11.17	33.41
E1B9M5	TR|E1B9M5|E1B9M5_BOVIN	PLA	PLA	56.71	NUC	7.697	CYT	5.89	32.84
E1B9M8	TR|E1B9M8|E1B9M8_BOVIN	PLA	PLA	15.64	NUC	15.29	EXC	14.31	30.82
E1B9N8	TR|E1B9N8|E1B9N8_BOVIN	NUC	NUC	19.16	CYT	15.14	PLA	13.45	32.91
E1B9R3	TR|E1B9R3|E1B9R3_BOVIN	END	END	53.89	CYT	5.528	NUC	5.485	30.68
E1B9S2	TR|E1B9S2|E1B9S2_BOVIN	CYT	CYT	17.63	NUC	14.79	PLA	13.58	31.51
E1B9S6	TR|E1B9S6|E1B9S6_BOVIN	NUC	NUC	16.21	CYT	14.27	PLA	10.44	29.88
E1B9T6	TR|E1B9T6|E1B9T6_BOVIN	NUC	NUC	30.1	CYT	14.32	PLA	11.65	37.42
E1B9T9	TR|E1B9T9|E1B9T9_BOVIN	CYT	CYT	15.69	NUC	14.86	PLA	13.04	30.3
E1B9U0	TR|E1B9U0|E1B9U0_BOVIN	NUC	NUC	20.69	CYT	14.86	PLA	13.88	33.48
E1B9U1	TR|E1B9U1|E1B9U1_BOVIN	NUC	NUC	24.08	CYT	15.91	PLA	8.087	36.73
E1B9V5	TR|E1B9V5|E1B9V5_BOVIN	CYT	CYT	12.44	PLA	12.17	NUC	11.37	24.55
E1B9V7	TR|E1B9V7|E1B9V7_BOVIN	NUC	NUC	16.5	CYT	14.8	PLA	9.352	30.76
E1B9X1	TR|E1B9X1|E1B9X1_BOVIN	NUC	NUC	26.87	CYT	24.31	PLA	9.173	49.87
E1B9Y1	TR|E1B9Y1|E1B9Y1_BOVIN	NUC	NUC	19.52	CYT	14.64	PLA	11.49	32.5
E1B9Y2	TR|E1B9Y2|E1B9Y2_BOVIN	NUC	NUC	16.79	CYT	14.45	PLA	13.32	30.51
E1BA03	TR|E1BA03|E1BA03_BOVIN	NUC	NUC	17.02	CYT	15.61	PLA	13.86	32.18
E1BA27	TR|E1BA27|E1BA27_BOVIN	CYT	CYT	14.8	NUC	14.53	PLA	11.65	29.25
E1BA42	TR|E1BA42|E1BA42_BOVIN	PLA	PLA	13.34	EXC	12.31	NUC	11.82	25.39
E1BA43	TR|E1BA43|E1BA43_BOVIN	PLA	PLA	22.05	JNC	20.49	CYT	11.48	41.88
E1BA82	TR|E1BA82|E1BA82_BOVIN	NUC	NUC	20.17	CYT	16.17	PLA	13.85	34.89
E1BA87	TR|E1BA87|E1BA87_BOVIN	PLA	PLA	48.67	NUC	10.26	EXC	8.171	36.3
E1BAA4	TR|E1BAA4|E1BAA4_BOVIN	PLA	PLA	20.48	NUC	14.29	CYT	12.65	32.62
E1BAA5	TR|E1BAA5|E1BAA5_BOVIN	NUC	NUC	15.82	CYT	15.03	PLA	13.34	30.61
E1BAB1	TR|E1BAB1|E1BAB1_BOVIN	PLA	PLA	27.03	NUC	12.31	EXC	10.49	33.55
E1BAB4	TR|E1BAB4|E1BAB4_BOVIN	PLA	PLA	64.01	CYT	5.197	NUC	5.038	28.5
E1BAB6	TR|E1BAB6|E1BAB6_BOVIN	NUC	NUC	15.04	CYT	13.12	PLA	12.57	27.61
E1BAC4	TR|E1BAC4|E1BAC4_BOVIN	CYT	CYT	20.77	NUC	15.65	PLA	12.85	34.55
E1BAD4	TR|E1BAD4|E1BAD4_BOVIN	NUC	NUC	57.31	CYT	11.88	PLA	5.826	37.76
E1BAI5	TR|E1BAI5|E1BAI5_BOVIN	NUC/CYT	NUC	34.04	CYT	32.94	PLA	5.331	66.24
E1BAJ9	TR|E1BAJ9|E1BAJ9_BOVIN	CYT	CYT	15.93	NUC	15.61	PLA	11.83	31.43
E1BAK4	TR|E1BAK4|E1BAK4_BOVIN	NUC	NUC	15.36	CYT	14.03	PLA	11.89	29.01
E1BAL0	TR|E1BAL0|E1BAL0_BOVIN	CYT/GOL	CYT	34.78	GOL	33.16	NUC	6.369	66.84
E1BAM1	TR|E1BAM1|E1BAM1_BOVIN	NUC	NUC	18.97	CYT	17.77	PLA	11.53	36.3
E1BAN8	TR|E1BAN8|E1BAN8_BOVIN	NUC	NUC	47.22	CYT	10.4	PLA	7.192	36.4
E1BAP3	TR|E1BAP3|E1BAP3_BOVIN	NUC	NUC	22.43	PLA	13.89	CYT	12.98	33.22
E1BAS3	TR|E1BAS3|E1BAS3_BOVIN	CSK	CSK	34.66	NUC	12.23	CYT	11.79	36.37
E1BAS5	TR|E1BAS5|E1BAS5_BOVIN	NUC	NUC	15.06	CYT	12.6	PLA	10.23	26.98
E1BAS6	TR|E1BAS6|E1BAS6_BOVIN	NUC	NUC	16.92	CYT	13.55	PLA	10.9	29.45
E1BAT0	TR|E1BAT0|E1BAT0_BOVIN	NUC	NUC	18.66	CYT	16.06	PLA	12.83	33.82
E1BAT4	TR|E1BAT4|E1BAT4_BOVIN	CYT	CYT	13.81	NUC	12.05	PLA	11.24	25.41
E1BAU4	TR|E1BAU4|E1BAU4_BOVIN	PLA	PLA	16.51	NUC	14.85	CYT	12.24	30.84
E1BAU6	TR|E1BAU6|E1BAU6_BOVIN	CSK	CSK	17.41	GOL	15.96	NUC	13.66	32.89
E1BAY7	TR|E1BAY7|E1BAY7_BOVIN	CYT	CYT	14.57	NUC	12.2	END	11.56	26.13
E1BAZ2	TR|E1BAZ2|E1BAZ2_BOVIN	NUC	NUC	12.58	CYT	12.2	EXC	9.617	24.68
E1BB08	TR|E1BB08|E1BB08_BOVIN	NUC	NUC	14.41	CYT	12.71	PLA	12.6	26.66
E1BB12	TR|E1BB12|E1BB12_BOVIN	NUC	NUC	28.07	CYT	10.78	PLA	9.064	32.13
E1BB16	TR|E1BB16|E1BB16_BOVIN	CYT	CYT	24.2	GOL	16.99	NUC	14.37	38.22
E1BB26	TR|E1BB26|E1BB26_BOVIN	NUC	NUC	13.82	PLA	13.16	CYT	13.03	26.81
E1BB27	TR|E1BB27|E1BB27_BOVIN	PLA/JNC	PLA	32.39	JNC	32.21	NUC	6.241	64.49
E1BB28	TR|E1BB28|E1BB28_BOVIN	MIT	MIT	31.38	NUC	10.03	CYT	9.912	32.57
E1BB38	TR|E1BB38|E1BB38_BOVIN	CYT	CYT	51.07	NUC	10.81	PLA	6.014	36.97
E1BB39	TR|E1BB39|E1BB39_BOVIN	NUC	NUC	13.64	CYT	13.52	PLA	11.86	27.13
E1BB43	TR|E1BB43|E1BB43_BOVIN	CYT	CYT	29.54	PLA	27.72	NUC	9.98	56.22
E1BB73	TR|E1BB73|E1BB73_BOVIN	NUC	NUC	15.4	CYT	14.33	PLA	11.4	29.4
E1BB77	TR|E1BB77|E1BB77_BOVIN	PLA	PLA	28.31	CYT	27.97	NUC	10.79	56.09
E1BB89	TR|E1BB89|E1BB89_BOVIN	CYT	CYT	42.39	PLA	22.09	NUC	7.54	51.39
E1BBB5	TR|E1BBB5|E1BBB5_BOVIN	NUC	NUC	19.29	CYT	13.6	PLA	11.48	31.02
E1BBB8	TR|E1BBB8|E1BBB8_BOVIN	NUC	NUC	55.31	PLA	6.139	CYT	6.139	31.23
E1BBI3	TR|E1BBI3|E1BBI3_BOVIN	PLA	PLA	50.33	EXC	7.085	NUC	6.945	32.59
E1BBI7	TR|E1BBI7|E1BBI7_BOVIN	NUC	NUC	43.18	CYT	11.77	PLA	9.732	37.69
E1BBJ2	TR|E1BBJ2|E1BBJ2_BOVIN	PLA/JNC	PLA	33.59	JNC	32.3	NUC	8.215	65.05
E1BBL2	TR|E1BBL2|E1BBL2_BOVIN	PLA	PLA	47.99	CYT	7.635	NUC	7.054	33.18
E1BBM0	TR|E1BBM0|E1BBM0_BOVIN	NUC	NUC	17.38	PLA	12.61	CYT	12.43	28.56
E1BBM3	TR|E1BBM3|E1BBM3_BOVIN	NUC	NUC	17.06	CYT	15.07	PLA	9.964	31.49
E1BBN3	TR|E1BBN3|E1BBN3_BOVIN	EXC	EXC	44.95	NUC	9.215	CYT	7.583	34.81
E1BBP0	TR|E1BBP0|E1BBP0_BOVIN	NUC	NUC	40.62	CYT	10.67	PLA	7.295	35.93
E1BBR9	TR|E1BBR9|E1BBR9_BOVIN	NUC	NUC	20.25	CYT	17.2	PLA	13.02	36.3
E1BBS9	TR|E1BBS9|E1BBS9_BOVIN	CSK	CSK	27.13	CYT	14.92	NUC	14.62	36.92
E1BBT4	TR|E1BBT4|E1BBT4_BOVIN	NUC	NUC	21.66	CYT	17.77	PLA	13.5	37.89
E1BBT9	TR|E1BBT9|E1BBT9_BOVIN	CYT	CYT	26.01	NUC	17.44	PLA	7.578	39.72
E1BBU2	TR|E1BBU2|E1BBU2_BOVIN	NUC	NUC	14.45	PLA	13.07	CYT	12.15	27.14
E1BBU6	TR|E1BBU6|E1BBU6_BOVIN	NUC	NUC	52.23	CYT	9.216	PLA	6.156	35.02
E1BBV1	TR|E1BBV1|E1BBV1_BOVIN	NUC	NUC	41.23	CYT	9.349	PLA	9.006	34.45
E1BBY6	TR|E1BBY6|E1BBY6_BOVIN	NUC	NUC	17.78	CYT	14.73	CSK	13.22	31.52
E1BC05	TR|E1BC05|E1BC05_BOVIN	NUC	NUC	14.89	PLA	14.18	CYT	13.04	28.86
E1BC36	TR|E1BC36|E1BC36_BOVIN	NUC	NUC	24.06	CYT	22.95	PLA	12.18	46.48
E1BC41	TR|E1BC41|E1BC41_BOVIN	CYT	CYT	21.03	CSK	19.59	NUC	14.94	40.03
E1BC44	TR|E1BC44|E1BC44_BOVIN	PLA	PLA	24.24	EXC	13.36	NUC	13.07	33.52
E1BC48	TR|E1BC48|E1BC48_BOVIN	CSK	CSK	28.69	NUC	14.27	CYT	11.62	36.76
E1BC65	TR|E1BC65|E1BC65_BOVIN	NUC	NUC	17.78	CYT	11.92	PLA	10.1	27.96
E1BC83	TR|E1BC83|E1BC83_BOVIN	NUC	NUC	14.56	CYT	12.48	MIT	9.152	26.47
E1BC86	TR|E1BC86|E1BC86_BOVIN	PLA	PLA	14.26	NUC	13.97	CYT	12.42	28.15
E1BC89	TR|E1BC89|E1BC89_BOVIN	NUC	NUC	15.61	PLA	12.95	CYT	12.21	27.8
E1BC91	TR|E1BC91|E1BC91_BOVIN	NUC	NUC	17.84	CYT	15.5	PLA	12.07	32.56
E1BC94	TR|E1BC94|E1BC94_BOVIN	NUC	NUC	18.74	CYT	14.68	PLA	13.22	32.07
E1BCA0	TR|E1BCA0|E1BCA0_BOVIN	NUC	NUC	19.46	CYT	14.25	PLA	11.61	31.96
E1BCA5	TR|E1BCA5|E1BCA5_BOVIN	EXC	EXC	47.92	NUC	8.626	CYT	7.597	34.33
E1BCC8	TR|E1BCC8|E1BCC8_BOVIN	CYT	CYT	16.81	NUC	13.66	PLA	9.845	29.51
E1BCF0	TR|E1BCF0|E1BCF0_BOVIN	CYT	CYT	17.01	NUC	16.12	CSK	10.76	32.84
E1BCF6	TR|E1BCF6|E1BCF6_BOVIN	NUC	NUC	43.21	CYT	10.36	PLA	9.034	35.97
E1BCG0	TR|E1BCG0|E1BCG0_BOVIN	NUC	NUC	15.97	CYT	14.66	PLA	14.41	30.23
E1BCH1	TR|E1BCH1|E1BCH1_BOVIN	NUC	NUC	17.88	CYT	14.42	PLA	12.89	31.17
E1BCH5	TR|E1BCH5|E1BCH5_BOVIN	CSK	CSK	38.79	CYT	18.36	NUC	10.46	45.48
E1BCH7	TR|E1BCH7|E1BCH7_BOVIN	NUC	NUC	24.27	CYT	22.91	PLA	9.844	46.54
E1BCI8	TR|E1BCI8|E1BCI8_BOVIN	PLA	PLA	68.01	CYT	4.535	NUC	4.328	26.5
E1BCK1	TR|E1BCK1|E1BCK1_BOVIN	NUC	NUC	25.73	CSK	21.42	CYT	9.93	45.12
E1BCL9	TR|E1BCL9|E1BCL9_BOVIN	NUC	NUC	38.16	CYT	13.24	PLA	11.36	38.59
E1BCP0	TR|E1BCP0|E1BCP0_BOVIN	PLA	PLA	42.2	JNC	26.16	NUC	4.996	57.4
E1BCR1	TR|E1BCR1|E1BCR1_BOVIN	PLA	PLA	16.82	NUC	11.12	CYT	10.28	26.34
E1BCS0	TR|E1BCS0|E1BCS0_BOVIN	NUC	NUC	17.85	PLA	12.49	CYT	11.9	28.71
E1BCT7	TR|E1BCT7|E1BCT7_BOVIN	NUC	NUC	42.7	EXC	11.6	PLA	8.427	37.41
E1BCT9	TR|E1BCT9|E1BCT9_BOVIN	NUC	NUC	32.12	CYT	28.78	PLA	7.644	58.87
E1BCU6	TR|E1BCU6|E1BCU6_BOVIN	EXC	EXC	22.7	PLA	11.67	CYT	10.8	30.58
E1BCV1	TR|E1BCV1|E1BCV1_BOVIN	NUC	NUC	28.96	CYT	27.05	PLA	8.509	54.94
E1BCV2	TR|E1BCV2|E1BCV2_BOVIN	NUC	NUC	17.93	CYT	16.18	PLA	9.792	33.52
E1BCV4	TR|E1BCV4|E1BCV4_BOVIN	NUC	NUC	51.23	CYT	8.275	PLA	6.238	33.94
E1BCW1	TR|E1BCW1|E1BCW1_BOVIN	NUC	NUC	40.03	CYT	8.586	CSK	6.422	33.33
E1BCW4	TR|E1BCW4|E1BCW4_BOVIN	NUC	NUC	37.98	CYT	8.991	PLA	7.474	33.35
E1BCY1	TR|E1BCY1|E1BCY1_BOVIN	NUC	NUC	16.21	CYT	15.05	PLA	11.87	30.9
E1BCZ0	TR|E1BCZ0|E1BCZ0_BOVIN	MIT	MIT	18.2	NUC	13.92	CYT	12.41	30.75
E1BCZ2	TR|E1BCZ2|E1BCZ2_BOVIN	NUC	NUC	46.82	CYT	9.685	PLA	7.365	35.52
E1BCZ3	TR|E1BCZ3|E1BCZ3_BOVIN	NUC	NUC	17.2	CYT	13.89	PLA	10.02	30.06
E1BCZ9	TR|E1BCZ9|E1BCZ9_BOVIN	NUC	NUC	16.43	CYT	12.76	PLA	9.204	28.12
E1BD36	TR|E1BD36|E1BD36_BOVIN	PLA	PLA	37.71	EXC	23.5	NUC	6.359	52.51
E1BD46	TR|E1BD46|E1BD46_BOVIN	CYT	CYT	39.97	NUC	14.05	PLA	6.873	40.02
E1BD73	TR|E1BD73|E1BD73_BOVIN	NUC	NUC	15.36	CYT	13.66	PLA	11.26	28.53
E1BD74	TR|E1BD74|E1BD74_BOVIN	NUC	NUC	17.34	CYT	14.71	PLA	11.53	31.21
E1BD77	TR|E1BD77|E1BD77_BOVIN	NUC	NUC	22.72	CYT	14.25	PLA	13.08	33.84
E1BDA7	TR|E1BDA7|E1BDA7_BOVIN	NUC	NUC	15.54	CYT	12.48	PLA	11.48	27.16
E1BDA9	TR|E1BDA9|E1BDA9_BOVIN	CYT	CYT	22.92	MIT	18.33	NUC	12.14	39.36
E1BDB1	TR|E1BDB1|E1BDB1_BOVIN	CYT	CYT	29.59	GOL	26.08	NUC	9.723	53.72
E1BDB4	TR|E1BDB4|E1BDB4_BOVIN	NUC	NUC	19.81	CYT	14.23	CSK	9.079	32.14
E1BDC2	TR|E1BDC2|E1BDC2_BOVIN	NUC	NUC	27.32	CYT	11.99	PLA	10.19	33.28
E1BDC4	TR|E1BDC4|E1BDC4_BOVIN	NUC	NUC	23.03	CYT	13.64	PLA	13.19	33.23
E1BDC9	TR|E1BDC9|E1BDC9_BOVIN	GOL	GOL	44.08	NUC	9.944	CYT	8.935	35.58
E1BDD5	TR|E1BDD5|E1BDD5_BOVIN	PLA	PLA	39.99	NUC	9.325	CYT	7.559	34.19
E1BDE1	TR|E1BDE1|E1BDE1_BOVIN	NUC	NUC	16.12	CYT	13.24	PLA	11.07	28.51
E1BDE8	TR|E1BDE8|E1BDE8_BOVIN	NUC	NUC	37.66	CYT	16.38	EXC	6.727	42.55
E1BDF3	TR|E1BDF3|E1BDF3_BOVIN	EXC	EXC	46.64	PLA	8.597	CYT	8.391	34.22
E1BDF7	TR|E1BDF7|E1BDF7_BOVIN	NUC	NUC	18.34	CYT	14.53	PLA	13.98	31.61
E1BDF9	TR|E1BDF9|E1BDF9_BOVIN	PLA	PLA	17.03	NUC	11.63	CYT	11.55	27.11
E1BDH4	TR|E1BDH4|E1BDH4_BOVIN	CSK	CSK	32.53	NUC	12.94	CYT	12.35	36.56
E1BDH9	TR|E1BDH9|E1BDH9_BOVIN	PLA	PLA	56.8	JNC	8.596	CYT	6.588	33.87
E1BDI3	TR|E1BDI3|E1BDI3_BOVIN	MIT	MIT	51.71	NUC	8.151	CYT	7.199	33.79
E1BDI4	TR|E1BDI4|E1BDI4_BOVIN	NUC	NUC	30.21	CYT	11.5	PLA	11.2	33.9
E1BDJ7	TR|E1BDJ7|E1BDJ7_BOVIN	PLA	PLA	15.65	NUC	14.98	CYT	13.67	30.42
E1BDL2	TR|E1BDL2|E1BDL2_BOVIN	NUC	NUC	14.45	CYT	13.76	PLA	10.89	28.01
E1BDL7	TR|E1BDL7|E1BDL7_BOVIN	CYT	CYT	17.82	NUC	13.97	PLA	13.84	30.57
E1BDM5	TR|E1BDM5|E1BDM5_BOVIN	JNC	JNC	28.78	PLA	14.04	EXC	11.42	36.51
E1BDM8	TR|E1BDM8|E1BDM8_BOVIN	CYT	CYT	46.73	NUC	27.52	PLA	3.377	59.99
E1BDP0	TR|E1BDP0|E1BDP0_BOVIN	PLA	PLA	30.83	JNC	26.53	NUC	8.645	54.89
E1BDQ2	TR|E1BDQ2|E1BDQ2_BOVIN	NUC	NUC	38.24	CYT	10.04	PLA	9.28	34.66
E1BDQ3	TR|E1BDQ3|E1BDQ3_BOVIN	NUC	NUC	43.46	CYT	22.62	EXC	4.627	52.32
E1BDR3	TR|E1BDR3|E1BDR3_BOVIN	PLA	PLA	28.25	NUC	11.85	CYT	10.63	33.52
E1BDU0	TR|E1BDU0|E1BDU0_BOVIN	NUC	NUC	42.62	CYT	8.875	CSK	6.132	34.12
E1BDU9	TR|E1BDU9|E1BDU9_BOVIN	NUC	NUC	47.13	CYT	10.12	CSK	7.291	36.07
E1BDV5	TR|E1BDV5|E1BDV5_BOVIN	NUC	NUC	26.07	CYT	23.85	PLA	11.8	48.81
E1BDV7	TR|E1BDV7|E1BDV7_BOVIN	CYT	CYT	43.08	NUC	9.879	PLA	6.936	35.38
E1BDV8	TR|E1BDV8|E1BDV8_BOVIN	PLA	PLA	15.88	NUC	10.27	CYT	10.16	24.69
E1BDW8	TR|E1BDW8|E1BDW8_BOVIN	GOL	GOL	13.5	EXC	13.19	NUC	10.82	26.6
E1BDX4	TR|E1BDX4|E1BDX4_BOVIN	NUC	NUC	47.1	CYT	13.23	PLA	5.905	39.9
E1BDX8	TR|E1BDX8|E1BDX8_BOVIN	CSK	CSK	62.99	NUC	5.803	CYT	5.162	29.45
E1BDZ3	TR|E1BDZ3|E1BDZ3_BOVIN	NUC	NUC	33.64	CYT	27.43	PLA	6.626	57.28
E1BDZ4	TR|E1BDZ4|E1BDZ4_BOVIN	CYT	CYT	16.61	NUC	15.12	PLA	10.56	31.25
E1BDZ7	TR|E1BDZ7|E1BDZ7_BOVIN	NUC	NUC	14.7	CYT	13.39	PLA	12.81	27.72
E1BE11	TR|E1BE11|E1BE11_BOVIN	PLA	PLA	14.27	EXC	13.91	NUC	11.36	28.08
E1BE18	TR|E1BE18|E1BE18_BOVIN	NUC	NUC	19.4	CYT	14.84	PLA	11.48	32.68
E1BE19	TR|E1BE19|E1BE19_BOVIN	NUC	NUC	19.56	CYT	15.31	PLA	13.11	33.39
E1BE31	TR|E1BE31|E1BE31_BOVIN	NUC	NUC	17.28	CYT	15.06	PLA	12.29	31.62
E1BE33	TR|E1BE33|E1BE33_BOVIN	NUC	NUC	56.44	CYT	7.608	PLA	6.248	32.77
E1BE55	TR|E1BE55|E1BE55_BOVIN	NUC	NUC	17.67	CYT	14.52	PLA	11.35	31.17
E1BE56	TR|E1BE56|E1BE56_BOVIN	CYT	CYT	13.67	NUC	12.26	PLA	10.3	25.56
E1BE64	TR|E1BE64|E1BE64_BOVIN	NUC/CYT	NUC	30.98	CYT	29.91	CSK	6.655	60.24
E1BE66	TR|E1BE66|E1BE66_BOVIN	CYT	CYT	13.78	NUC	13.23	PLA	11.45	26.86
E1BE68	TR|E1BE68|E1BE68_BOVIN	NUC	NUC	14.47	PLA	12.92	CYT	12.29	26.97
E1BE71	TR|E1BE71|E1BE71_BOVIN	PLA	PLA	28.19	NUC	14.34	CYT	11.47	36.65
E1BE78	TR|E1BE78|E1BE78_BOVIN	NUC	NUC	14.93	CYT	13.73	PLA	10.59	28.31
E1BE82	TR|E1BE82|E1BE82_BOVIN	CYT	CYT	19	NUC	17.29	PLA	11.85	35.66
E1BE83	TR|E1BE83|E1BE83_BOVIN	NUC	NUC	31.16	CYT	11.73	PLA	9.27	34.55
E1BE88	TR|E1BE88|E1BE88_BOVIN	CYT	CYT	31.57	NUC	15.54	PLA	11.07	39.56
E1BE97	TR|E1BE97|E1BE97_BOVIN	NUC	NUC	21.04	CYT	17.79	PLA	10.1	37.57
E1BE98	TR|E1BE98|E1BE98_BOVIN	NUC/CYT	NUC	38.35	CYT	33.25	END	3.52	67.96
E1BEA5	TR|E1BEA5|E1BEA5_BOVIN	NUC	NUC	47.19	CYT	9.323	PLA	7.385	35.11
E1BEB3	TR|E1BEB3|E1BEB3_BOVIN	NUC	NUC	20.16	CYT	15.69	PLA	11.57	34.25
E1BEB7	TR|E1BEB7|E1BEB7_BOVIN	NUC	NUC	20.5	PLA	15.81	CYT	14.39	34.6
E1BEB8	TR|E1BEB8|E1BEB8_BOVIN	NUC	NUC	21.1	CYT	13.79	PLA	10.79	32.34
E1BED7	TR|E1BED7|E1BED7_BOVIN	NUC	NUC	13.73	CYT	12.76	PLA	10.76	26.24
E1BED9	TR|E1BED9|E1BED9_BOVIN	CYT	CYT	20.98	NUC	12.32	CSK	9.084	30.42
E1BEE6	TR|E1BEE6|E1BEE6_BOVIN	NUC	NUC	27.06	CYT	11.69	PLA	8.889	32.8
E1BEG6	TR|E1BEG6|E1BEG6_BOVIN	PLA	PLA	25.79	JNC	22.83	NUC	15.05	47.19
E1BEH3	TR|E1BEH3|E1BEH3_BOVIN	PLA	PLA	40.56	NUC	11.66	CYT	9.594	37.13
E1BEH8	TR|E1BEH8|E1BEH8_BOVIN	GOL	GOL	42.83	PLA	10.38	EXC	6.335	35.95
E1BEJ3	TR|E1BEJ3|E1BEJ3_BOVIN	MIT	MIT	54.48	NUC	6.821	CYT	6.792	32.09
E1BEJ9	TR|E1BEJ9|E1BEJ9_BOVIN	NUC	NUC	13.9	CYT	13.03	PLA	11.83	26.69
E1BEK9	TR|E1BEK9|E1BEK9_BOVIN	CYT	CYT	44.56	NUC	12.29	PLA	7.16	38.51
E1BEL4	TR|E1BEL4|E1BEL4_BOVIN	PLA	PLA	16.25	NUC	13.7	CYT	13.66	29.18
E1BEL6	TR|E1BEL6|E1BEL6_BOVIN	PLA	PLA	59.86	EXC	5.693	NUC	4.813	30.05
E1BEL9	TR|E1BEL9|E1BEL9_BOVIN	CYT	CYT	15.05	NUC	14.17	PLA	11.78	28.97
E1BEM1	TR|E1BEM1|E1BEM1_BOVIN	NUC	NUC	15.76	CYT	12.1	PLA	10.48	26.84
E1BEM6	TR|E1BEM6|E1BEM6_BOVIN	PLA	PLA	20.16	EXC	14.45	CYT	10.49	32.63
E1BEN9	TR|E1BEN9|E1BEN9_BOVIN	EXC	EXC	59.08	NUC	6.614	PLA	6.194	31.23
E1BEQ6	TR|E1BEQ6|E1BEQ6_BOVIN	NUC	NUC	19.33	CYT	16.66	PLA	12.14	35.03
E1BES2	TR|E1BES2|E1BES2_BOVIN	NUC	NUC	11.04	CYT	11.01	PLA	10.33	22.05
E1BET0	TR|E1BET0|E1BET0_BOVIN	END	END	39.66	NUC	10.36	CYT	10.31	35.36
E1BET1	TR|E1BET1|E1BET1_BOVIN	NUC	NUC	14.66	CSK	14.49	JNC	13.27	29.11
E1BET5	TR|E1BET5|E1BET5_BOVIN	CYT	CYT	33.23	NUC	12.73	PLA	9.292	36.54
E1BET7	TR|E1BET7|E1BET7_BOVIN	NUC	NUC	15.37	CYT	13.77	PLA	10.74	28.67
E1BEU0	TR|E1BEU0|E1BEU0_BOVIN	PLA	PLA	46.87	POX	9.291	CYT	5.801	35.06
E1BEW2	TR|E1BEW2|E1BEW2_BOVIN	NUC	NUC	21.93	PLA	16.37	CYT	15.75	36.17
E1BEX3	TR|E1BEX3|E1BEX3_BOVIN	NUC	NUC	15.41	CYT	14.71	PLA	12.1	29.9
E1BEZ0	TR|E1BEZ0|E1BEZ0_BOVIN	NUC	NUC	24.15	CYT	11.64	PLA	8.505	31.31
E1BEZ6	TR|E1BEZ6|E1BEZ6_BOVIN	NUC	NUC	12.42	CYT	11.49	PLA	10.87	23.69
E1BEZ8	TR|E1BEZ8|E1BEZ8_BOVIN	CYT	CYT	14.65	NUC	14.6	PLA	13.35	29.24
E1BF15	TR|E1BF15|E1BF15_BOVIN	NUC	NUC	32.88	CYT	11.92	PLA	8.87	35.41
E1BF29	TR|E1BF29|E1BF29_BOVIN	CYT/CSK	CYT	30.4	CSK	29.94	NUC	9.222	60.06
E1BF32	TR|E1BF32|E1BF32_BOVIN	NUC	NUC	15.68	CYT	14.2	PLA	10.31	29.44
E1BF37	TR|E1BF37|E1BF37_BOVIN	NUC	NUC	26.37	CYT	14.84	PLA	10.18	36.46
E1BF40	TR|E1BF40|E1BF40_BOVIN	CYT	CYT	26.91	NUC	14.19	PLA	8.971	35.87
E1BF46	TR|E1BF46|E1BF46_BOVIN	NUC	NUC	17.81	CYT	13.97	PLA	10.22	30.55
E1BF57	TR|E1BF57|E1BF57_BOVIN	NUC	NUC	49.06	CYT	5.998	PLA	5.528	31.35
E1BF68	TR|E1BF68|E1BF68_BOVIN	NUC	NUC	53.8	CYT	8.527	CSK	5.6	34.11
E1BF74	TR|E1BF74|E1BF74_BOVIN	NUC	NUC	19.21	CYT	14.07	PLA	13.89	31.57
E1BF86	TR|E1BF86|E1BF86_BOVIN	PLA	PLA	49.24	NUC	9.19	CYT	7.436	35.03
E1BF95	TR|E1BF95|E1BF95_BOVIN	NUC	NUC	18.32	CYT	16.34	PLA	12.82	33.98
E1BF96	TR|E1BF96|E1BF96_BOVIN	NUC	NUC	20.05	CYT	15.68	PLA	12.19	34.17
E1BFA7	TR|E1BFA7|E1BFA7_BOVIN	NUC	NUC	17.8	CYT	15.64	CSK	15.08	32.72
E1BFA8	TR|E1BFA8|E1BFA8_BOVIN	NUC	NUC	14.37	CYT	13.56	PLA	10.97	27.71
E1BFB0	TR|E1BFB0|E1BFB0_BOVIN	CSK/CYT	CSK	32.11	CYT	29.97	GOL	8.179	60.75
E1BFB4	TR|E1BFB4|E1BFB4_BOVIN	NUC	NUC	16.26	PLA	13.08	CYT	12.83	28.41
E1BFB9	TR|E1BFB9|E1BFB9_BOVIN	CYT	CYT	29.43	NUC	13.57	PLA	9.606	36.18
E1BFC1	TR|E1BFC1|E1BFC1_BOVIN	NUC	NUC	37.81	CYT	11.11	PLA	9.911	35.86
E1BFD1	TR|E1BFD1|E1BFD1_BOVIN	NUC	NUC	14.92	CYT	13.21	PLA	12.46	27.65
E1BFE2	TR|E1BFE2|E1BFE2_BOVIN	PLA	PLA	14.43	CYT	13.23	NUC	12.89	27.33
E1BFE5	TR|E1BFE5|E1BFE5_BOVIN	NUC	NUC	14.69	CYT	11.5	PLA	10.51	25.36
E1BFE8	TR|E1BFE8|E1BFE8_BOVIN	JNC	JNC	30.18	CSK	11.81	NUC	10.03	34.28
E1BFF4	TR|E1BFF4|E1BFF4_BOVIN	CYT	CYT	15.83	NUC	15.64	CSK	14.31	31.41
E1BFF9	TR|E1BFF9|E1BFF9_BOVIN	GOL	GOL	32.39	NUC	13.55	CYT	12.94	37.28
E1BFG7	TR|E1BFG7|E1BFG7_BOVIN	NUC	NUC	26.11	CYT	14.42	PLA	11.97	35.79
E1BFH4	TR|E1BFH4|E1BFH4_BOVIN	GOL	GOL	34.7	PLA	23.91	NUC	8.127	52.28
E1BFK4	TR|E1BFK4|E1BFK4_BOVIN	NUC	NUC	17.27	CYT	15.37	PLA	11.5	32.01
E1BFK7	TR|E1BFK7|E1BFK7_BOVIN	PLA	PLA	36.53	NUC	9.097	CYT	7.889	33.11
E1BFK8	TR|E1BFK8|E1BFK8_BOVIN	NUC	NUC	39.06	CYT	9.043	PLA	7.41	33.66
E1BFL2	TR|E1BFL2|E1BFL2_BOVIN	NUC	NUC	35.4	CYT	13.42	PLA	7.456	38.09
E1BFM0	TR|E1BFM0|E1BFM0_BOVIN	NUC	NUC	15.78	CYT	14.08	PLA	10.1	29.35
E1BFP0	TR|E1BFP0|E1BFP0_BOVIN	NUC	NUC	18.71	CYT	15.26	PLA	13.76	32.8
E1BFQ6	TR|E1BFQ6|E1BFQ6_BOVIN	PLA	PLA	54.62	CYT	6.203	NUC	6.03	31.37
E1BFR1	TR|E1BFR1|E1BFR1_BOVIN	NUC	NUC	31.8	CYT	14.23	PLA	8.3	37.95
E1BFR4	TR|E1BFR4|E1BFR4_BOVIN	PLA	PLA	14.17	NUC	11.73	CYT	11.12	25.27
E1BFS2	TR|E1BFS2|E1BFS2_BOVIN	CYT	CYT	28.51	PLA	27.38	NUC	10.08	55.25
E1BFT8	TR|E1BFT8|E1BFT8_BOVIN	NUC	NUC	17.74	CYT	15.21	PLA	11.39	32.11
E1BFV4	TR|E1BFV4|E1BFV4_BOVIN	NUC	NUC	13.45	EXC	12.89	CYT	12.82	26.19
E1BFV9	TR|E1BFV9|E1BFV9_BOVIN	JNC	JNC	26.6	NUC	13.94	CYT	11.4	35.41
E1BFW7	TR|E1BFW7|E1BFW7_BOVIN	NUC	NUC	17.79	CYT	13.36	PLA	12.84	29.77
E1BFY5	TR|E1BFY5|E1BFY5_BOVIN	NUC	NUC	15.68	CYT	13.16	PLA	10.98	28.12
E1BFZ9	TR|E1BFZ9|E1BFZ9_BOVIN	NUC	NUC	27.28	PLA	9.603	CYT	9.458	30.36
E1BG05	TR|E1BG05|E1BG05_BOVIN	NUC	NUC	16.28	PLA	16.05	CYT	13.07	32.26
E1BG09	TR|E1BG09|E1BG09_BOVIN	NUC	NUC	14.37	CYT	14.35	PLA	13.19	28.72
E1BG23	TR|E1BG23|E1BG23_BOVIN	NUC	NUC	29.33	CYT	28.76	PLA	8.142	57.75
E1BG38	TR|E1BG38|E1BG38_BOVIN	CYT	CYT	26.7	PLA	24.04	NUC	11.71	49.39
E1BG49	TR|E1BG49|E1BG49_BOVIN	NUC	NUC	24.4	CYT	23.42	CSK	14.37	47.35
E1BG52	TR|E1BG52|E1BG52_BOVIN	NUC	NUC	18.17	CYT	15.36	PLA	14.5	32.59
E1BG59	TR|E1BG59|E1BG59_BOVIN	CYT	CYT	17.08	NUC	14	PLA	13.67	30.12
E1BG63	TR|E1BG63|E1BG63_BOVIN	PLA	PLA	13.65	NUC	12.74	CYT	11.42	26.15
E1BG65	TR|E1BG65|E1BG65_BOVIN	PLA	PLA	45.93	NUC	9.091	CYT	8.086	34.75
E1BG86	TR|E1BG86|E1BG86_BOVIN	NUC	NUC	22.01	CYT	15.82	PLA	14.85	35.49
E1BG88	TR|E1BG88|E1BG88_BOVIN	NUC	NUC	16.53	CYT	12.43	PLA	11.27	27.77
E1BG98	TR|E1BG98|E1BG98_BOVIN	NUC	NUC	28.49	CYT	9.92	PLA	8.646	31.28
E1BG99	TR|E1BG99|E1BG99_BOVIN	NUC	NUC	31.5	CYT	29.52	PLA	7.301	59.81
E1BGA0	TR|E1BGA0|E1BGA0_BOVIN	PLA	PLA	46.2	NUC	8.842	CYT	7.741	34.48
E1BGA9	TR|E1BGA9|E1BGA9_BOVIN	NUC	NUC	15.38	CYT	15.33	PLA	13.98	30.7
E1BGB0	TR|E1BGB0|E1BGB0_BOVIN	CSK	CSK	34.24	NUC	11.73	CYT	10.4	35.62
E1BGB2	TR|E1BGB2|E1BGB2_BOVIN	NUC	NUC	18.96	CYT	15.71	PLA	11.29	33.54
E1BGC9	TR|E1BGC9|E1BGC9_BOVIN	NUC	NUC	27.73	CYT	23.9	PLA	9.604	49.65
E1BGE2	TR|E1BGE2|E1BGE2_BOVIN	NUC	NUC	37.87	CYT	9.757	PLA	8.426	34.24
E1BGF8	TR|E1BGF8|E1BGF8_BOVIN	END	END	49.57	PLA	8.479	CYT	6.413	34.2
E1BGG6	TR|E1BGG6|E1BGG6_BOVIN	NUC	NUC	36.09	CYT	12.74	PLA	9.017	37.43
E1BGH0	TR|E1BGH0|E1BGH0_BOVIN	NUC	NUC	28.36	CYT	27.94	PLA	8.578	56.07
E1BGH3	TR|E1BGH3|E1BGH3_BOVIN	CYT	CYT	20.3	NUC	16.46	CSK	14.29	35.35
E1BGJ6	TR|E1BGJ6|E1BGJ6_BOVIN	CYT	CYT	33.27	NUC	18.04	CSK	7.878	43.5
E1BGJ9	TR|E1BGJ9|E1BGJ9_BOVIN	CYT	CYT	42.29	NUC	11.21	END	6.059	36.88
E1BGK6	TR|E1BGK6|E1BGK6_BOVIN	PLA	PLA	31.95	CYT	29.4	NUC	6.854	59.79
E1BGL2	TR|E1BGL2|E1BGL2_BOVIN	NUC	NUC	16.8	CYT	13.7	PLA	12.92	29.55
E1BGL8	TR|E1BGL8|E1BGL8_BOVIN	PLA	PLA	25.02	EXC	23.36	NUC	9.635	47.57
E1BGM0	TR|E1BGM0|E1BGM0_BOVIN	PLA	PLA	30.74	JNC	27.25	CYT	6.825	55.96
E1BGP1	TR|E1BGP1|E1BGP1_BOVIN	NUC	NUC	15.92	CYT	14.66	PLA	13.28	30.19
E1BGP4	TR|E1BGP4|E1BGP4_BOVIN	NUC	NUC	19.61	CYT	13.74	PLA	12.45	31.39
E1BGS3	TR|E1BGS3|E1BGS3_BOVIN	EXC	EXC	51.4	NUC	6.52	PLA	6.236	31.92
E1BGS4	TR|E1BGS4|E1BGS4_BOVIN	NUC	NUC	20.2	CYT	19.68	PLA	9.071	39.67
E1BGU8	TR|E1BGU8|E1BGU8_BOVIN	CYT	CYT	14.84	NUC	14.12	EXC	9.934	28.75
E1BGW5	TR|E1BGW5|E1BGW5_BOVIN	NUC	NUC	42	CYT	10.11	PLA	8.121	35.49
E1BGX4	TR|E1BGX4|E1BGX4_BOVIN	NUC	NUC	19.84	CYT	16.09	PLA	9.165	34.58
E1BGX6	TR|E1BGX6|E1BGX6_BOVIN	NUC	NUC	15.53	CYT	11.33	EXC	9.16	25.73
E1BGX7	TR|E1BGX7|E1BGX7_BOVIN	JNC	JNC	28.17	PLA	26.98	NUC	8.067	54.5
E1BGY9	TR|E1BGY9|E1BGY9_BOVIN	PLA	PLA	29.66	END	28.41	NUC	8.596	57.35
E1BGZ1	TR|E1BGZ1|E1BGZ1_BOVIN	NUC	NUC	14.95	CYT	12.19	PLA	10.66	26.39
E1BH02	TR|E1BH02|E1BH02_BOVIN	NUC	NUC	15.89	CYT	13.42	PLA	12.03	28.59
E1BH05	TR|E1BH05|E1BH05_BOVIN	CYT	CYT	15.85	NUC	15.58	PLA	13.43	31.34
E1BH25	TR|E1BH25|E1BH25_BOVIN	CYT	CYT	48.19	NUC	9.56	PLA	6.577	35.44
E1BH40	TR|E1BH40|E1BH40_BOVIN	NUC	NUC	46.33	CYT	8.424	PLA	7.16	34
E1BH47	TR|E1BH47|E1BH47_BOVIN	CSK	CSK	20.8	NUC	16.38	CYT	14.65	35.54
E1BH49	TR|E1BH49|E1BH49_BOVIN	NUC	NUC	15.42	CYT	13.79	PLA	10.66	28.74
E1BH64	TR|E1BH64|E1BH64_BOVIN	MIT	MIT	35.59	NUC	10.84	PLA	10.4	34.94
E1BH71	TR|E1BH71|E1BH71_BOVIN	NUC	NUC	18.05	CYT	17.09	PLA	9.174	34.8
E1BH78	TR|E1BH78|E1BH78_BOVIN	NUC	NUC	46.61	CYT	11.37	PLA	6.43	37.55
E1BH79	TR|E1BH79|E1BH79_BOVIN	CYT	CYT	19.19	NUC	12.76	MIT	9.339	29.9
E1BH94	TR|E1BH94|E1BH94_BOVIN	EXC	EXC	34.3	PLA	10.82	NUC	9.909	34.52
E1BHA0	TR|E1BHA0|E1BHA0_BOVIN	CYT	CYT	17.82	NUC	15.95	CSK	14.38	33.14
E1BHC8	TR|E1BHC8|E1BHC8_BOVIN	CSK	CSK	21.53	JNC	19.82	NUC	13.32	40.64
E1BHD7	TR|E1BHD7|E1BHD7_BOVIN	CYT	CYT	13.97	NUC	13.86	PLA	10.53	27.79
E1BHD8	TR|E1BHD8|E1BHD8_BOVIN	CYT	CYT	13.77	NUC	13.17	PLA	11.15	26.79
E1BHE1	TR|E1BHE1|E1BHE1_BOVIN	CYT/PLA	CYT	36.83	PLA	28.88	NUC	7.472	60.49
E1BHF6	TR|E1BHF6|E1BHF6_BOVIN	NUC	NUC	15.96	CYT	13.91	CSK	11.81	29.26
E1BHG2	TR|E1BHG2|E1BHG2_BOVIN	NUC	NUC	16.08	CYT	13.35	PLA	10.04	28.63
E1BHH2	TR|E1BHH2|E1BHH2_BOVIN	NUC	NUC	48.81	CYT	17.51	PLA	4.649	45.56
E1BHJ5	TR|E1BHJ5|E1BHJ5_BOVIN	CYT	CYT	28.99	CSK	28.23	NUC	7.144	56.79
E1BHK3	TR|E1BHK3|E1BHK3_BOVIN	NUC	NUC	15.78	CYT	13.27	PLA	11.59	28.32
E1BHL0	TR|E1BHL0|E1BHL0_BOVIN	NUC	NUC	17.28	PLA	14.92	CYT	14.14	31.43
E1BHM1	TR|E1BHM1|E1BHM1_BOVIN	NUC	NUC	46.34	CYT	10.14	PLA	10.08	36.03
E1BHU6	TR|E1BHU6|E1BHU6_BOVIN	NUC	NUC	23.69	CYT	14.65	PLA	12.7	34.87
E1BHX7	TR|E1BHX7|E1BHX7_BOVIN	PLA	PLA	31.8	CYT	22.66	NUC	22.26	49.48
E1BHY5	TR|E1BHY5|E1BHY5_BOVIN	EXC	EXC	21.88	NUC	12.9	PLA	10.87	31.66
E1BI11	TR|E1BI11|E1BI11_BOVIN	NUC	NUC	19.58	CYT	14.86	PLA	11.71	32.81
E1BI26	TR|E1BI26|E1BI26_BOVIN	NUC	NUC	25.83	PLA	11.82	CYT	11.67	32.37
E1BI41	TR|E1BI41|E1BI41_BOVIN	CYT	CYT	26.06	NUC	13.32	PLA	9.721	34.36
E1BI42	TR|E1BI42|E1BI42_BOVIN	NUC	NUC	16.93	CYT	16.03	PLA	9.675	32.66
E1BI51	TR|E1BI51|E1BI51_BOVIN	NUC	NUC	17.46	CYT	14.29	PLA	13.45	30.74
E1BI72	TR|E1BI72|E1BI72_BOVIN	EXC	EXC	15.3	NUC	11.19	PLA	10.1	25.4
E1BI79	TR|E1BI79|E1BI79_BOVIN	CSK	CSK	21.85	GOL	19.74	NUC	12.02	40.71
E1BI97	TR|E1BI97|E1BI97_BOVIN	NUC	NUC	15.11	CYT	12.95	PLA	9.788	27.45
E1BIA1	TR|E1BIA1|E1BIA1_BOVIN	CYT	CYT	23.57	EXC	14.44	NUC	13.52	34.54
E1BIA9	TR|E1BIA9|E1BIA9_BOVIN	NUC	NUC	40.74	CYT	12.74	PLA	8.751	38.51
E1BID8	TR|E1BID8|E1BID8_BOVIN	NUC	NUC	13.73	CYT	13.21	CSK	9.367	26.8
E1BIF0	TR|E1BIF0|E1BIF0_BOVIN	NUC	NUC	50.64	CYT	7.514	PLA	5.631	33.07
E1BIF6	TR|E1BIF6|E1BIF6_BOVIN	NUC	NUC	14.73	CYT	12.51	PLA	10.83	26.64
E1BIF7	TR|E1BIF7|E1BIF7_BOVIN	MIT	MIT	31.73	NUC	13.98	CYT	10.07	37.59
E1BIG0	TR|E1BIG0|E1BIG0_BOVIN	NUC	NUC	18.58	CYT	15.18	PLA	11.8	32.62
E1BIG2	TR|E1BIG2|E1BIG2_BOVIN	PLA	PLA	17.57	NUC	14.56	JNC	14.26	31.17
E1BIG4	TR|E1BIG4|E1BIG4_BOVIN	EXC	EXC	26.96	PLA	12.93	NUC	12.39	34.3
E1BIG6	TR|E1BIG6|E1BIG6_BOVIN	PLA	PLA	29.29	CYT	11.52	NUC	9.859	33.56
E1BIH4	TR|E1BIH4|E1BIH4_BOVIN	PLA	PLA	31.2	JNC	29.7	CYT	6.71	59.99
E1BII7	TR|E1BII7|E1BII7_BOVIN	NUC	NUC	27.77	CYT	15.8	MIT	8.267	38.36
E1BIJ3	TR|E1BIJ3|E1BIJ3_BOVIN	NUC	NUC	19.39	CYT	18.55	PLA	13.78	37.61
E1BIJ4	TR|E1BIJ4|E1BIJ4_BOVIN	NUC	NUC	43.09	CYT	10.12	PLA	9.957	35.67
E1BIJ5	TR|E1BIJ5|E1BIJ5_BOVIN	NUC	NUC	16.02	CYT	14.24	PLA	10.49	29.72
E1BIL3	TR|E1BIL3|E1BIL3_BOVIN	PLA	PLA	19.17	NUC	13.71	CYT	12.6	31.09
E1BIL8	TR|E1BIL8|E1BIL8_BOVIN	NUC	NUC	15.21	CYT	14.96	EXC	10.3	30.1
E1BIM3	TR|E1BIM3|E1BIM3_BOVIN	NUC	NUC	16.53	CYT	12.48	PLA	12.3	27.83
E1BIN1	TR|E1BIN1|E1BIN1_BOVIN	NUC	NUC	14.35	PLA	12.28	CYT	11.93	26.08
E1BIN2	TR|E1BIN2|E1BIN2_BOVIN	PLA	PLA	47.7	NUC	7.953	CYT	7.141	33.53
E1BIN9	TR|E1BIN9|E1BIN9_BOVIN	NUC	NUC	20.52	CYT	13.91	PLA	10.57	32.15
E1BIQ0	TR|E1BIQ0|E1BIQ0_BOVIN	MIT	MIT	37.57	NUC	9.94	CYT	8.331	34.38
E1BIQ7	TR|E1BIQ7|E1BIQ7_BOVIN	NUC	NUC	20.44	CYT	15.14	PLA	13.76	33.69
E1BIQ8	TR|E1BIQ8|E1BIQ8_BOVIN	JNC/PLA	JNC	33.03	PLA	32.97	NUC	6.277	65.96
E1BIR1	TR|E1BIR1|E1BIR1_BOVIN	NUC	NUC	31.52	CYT	13.19	PLA	9.323	36.51
E1BIR4	TR|E1BIR4|E1BIR4_BOVIN	NUC	NUC	15.67	CYT	12.66	PLA	10.45	27.48
E1BIR5	TR|E1BIR5|E1BIR5_BOVIN	EXC	EXC	36.72	NUC	9.426	CYT	7.766	33.55
E1BIR8	TR|E1BIR8|E1BIR8_BOVIN	NUC	NUC	18.7	CYT	17.68	PLA	11.13	36.01
E1BIS6	TR|E1BIS6|E1BIS6_BOVIN	CSK	CSK	16.92	JNC	14.73	NUC	13.94	30.96
E1BIT3	TR|E1BIT3|E1BIT3_BOVIN	PLA	PLA	30.03	CYT	29.26	NUC	7.94	58.84
E1BIT8	TR|E1BIT8|E1BIT8_BOVIN	PLA	PLA	47.78	NUC	9.127	CYT	7.376	34.91
E1BIU4	TR|E1BIU4|E1BIU4_BOVIN	NUC	NUC	44.15	CYT	9.714	PLA	6.766	35.32
E1BIU5	TR|E1BIU5|E1BIU5_BOVIN	NUC	NUC	18.57	CYT	15.09	PLA	10.85	32.49
E1BIU7	TR|E1BIU7|E1BIU7_BOVIN	CYT	CYT	27.2	CSK	24.3	NUC	10.83	50
E1BIU8	TR|E1BIU8|E1BIU8_BOVIN	PLA	PLA	53.73	CYT	7.645	NUC	6.758	33.09
E1BIW0	TR|E1BIW0|E1BIW0_BOVIN	CYT	CYT	41.76	NUC	10.75	PLA	6.117	36.22
E1BIX2	TR|E1BIX2|E1BIX2_BOVIN	NUC	NUC	20.55	CYT	13.08	PLA	9.261	31.12
E1BIX7	TR|E1BIX7|E1BIX7_BOVIN	CYT	CYT	41.4	NUC	11.25	PLA	6.265	36.78
E1BIY0	TR|E1BIY0|E1BIY0_BOVIN	NUC	NUC	14.82	CYT	12.2	PLA	11.87	26.31
E1BJ16	TR|E1BJ16|E1BJ16_BOVIN	NUC	NUC	21.35	CYT	15.54	PLA	10.47	34.74
E1BJ19	TR|E1BJ19|E1BJ19_BOVIN	CYT	CYT	45.58	PLA	14.51	NUC	9.194	41.42
E1BJ30	TR|E1BJ30|E1BJ30_BOVIN	NUC	NUC	21.59	CYT	14.16	PLA	11.47	33.1
E1BJ59	TR|E1BJ59|E1BJ59_BOVIN	PLA	PLA	36.66	NUC	14.36	CYT	11.86	39.64
E1BJ80	TR|E1BJ80|E1BJ80_BOVIN	CYT	CYT	13.44	NUC	12.51	MIT	9.984	25.71
E1BJ94	TR|E1BJ94|E1BJ94_BOVIN	EXC	EXC	26.15	PLA	18.42	CYT	8.969	41.13
E1BJA2	TR|E1BJA2|E1BJA2_BOVIN	NUC	NUC	14.61	CYT	13.8	MIT	12.74	28.18
E1BJB5	TR|E1BJB5|E1BJB5_BOVIN	CSK	CSK	22.24	NUC	12.81	PLA	11.07	31.74
E1BJC6	TR|E1BJC6|E1BJC6_BOVIN	NUC	NUC	16.56	CYT	14.93	EXC	10.56	30.98
E1BJD0	TR|E1BJD0|E1BJD0_BOVIN	NUC	NUC	17.55	CYT	15.7	PLA	12.17	32.64
E1BJD2	TR|E1BJD2|E1BJD2_BOVIN	NUC/CYT	NUC	34.77	CYT	31.62	PLA	5.872	64.3
E1BJE1	TR|E1BJE1|E1BJE1_BOVIN	NUC	NUC	15.62	CYT	13.17	PLA	11.46	28.09
E1BJE2	TR|E1BJE2|E1BJE2_BOVIN	PLA	PLA	41.77	NUC	8.936	CYT	8.92	34.06
E1BJE5	TR|E1BJE5|E1BJE5_BOVIN	NUC	NUC	26.04	CYT	21.89	PLA	12.45	45.93
E1BJF6	TR|E1BJF6|E1BJF6_BOVIN	NUC	NUC	22.92	CYT	21.72	PLA	10.2	44.1
E1BJG8	TR|E1BJG8|E1BJG8_BOVIN	NUC	NUC	16.05	CYT	14.94	CSK	12.18	30.66
E1BJH9	TR|E1BJH9|E1BJH9_BOVIN	NUC	NUC	15.92	CYT	14.92	PLA	11.32	30.53
E1BJI4	TR|E1BJI4|E1BJI4_BOVIN	NUC	NUC	18	CYT	15.09	PLA	11.27	32.13
E1BJI9	TR|E1BJI9|E1BJI9_BOVIN	NUC	NUC	14.02	CYT	13.53	PLA	13.14	27.41
E1BJJ0	TR|E1BJJ0|E1BJJ0_BOVIN	PLA	PLA	18.51	NUC	11.42	EXC	8.855	27.8
E1BJK7	TR|E1BJK7|E1BJK7_BOVIN	MIT	MIT	28.01	CYT	14.64	NUC	14.19	36.95
E1BJL1	TR|E1BJL1|E1BJL1_BOVIN	PLA	PLA	12.78	MIT	10.68	NUC	10.43	22.97
E1BJL3	TR|E1BJL3|E1BJL3_BOVIN	NUC	NUC	16.69	CYT	13.31	PLA	12.15	28.98
E1BJM5	TR|E1BJM5|E1BJM5_BOVIN	CYT	CYT	24.97	NUC	14.53	PLA	11.57	35.38
E1BJP2	TR|E1BJP2|E1BJP2_BOVIN	CYT	CYT	15.63	NUC	15.1	EXC	10.27	30.56
E1BJQ9	TR|E1BJQ9|E1BJQ9_BOVIN	EXC	EXC	59.25	PLA	5.322	NUC	5.251	29.75
E1BJS3	TR|E1BJS3|E1BJS3_BOVIN	CYT	CYT	50.92	NUC	9.707	PLA	6.978	35.64
E1BJT7	TR|E1BJT7|E1BJT7_BOVIN	CYT	CYT	13.94	NUC	12.89	EXC	9.819	26.55
E1BJU6	TR|E1BJU6|E1BJU6_BOVIN	NUC	NUC	29.65	CYT	11.94	PLA	10	34.22
E1BJV1	TR|E1BJV1|E1BJV1_BOVIN	CSK	CSK	18.48	CYT	14.53	NUC	14.23	31.71
E1BJV8	TR|E1BJV8|E1BJV8_BOVIN	NUC	NUC	39.03	CYT	11.8	PLA	8.198	36.99
E1BJZ0	TR|E1BJZ0|E1BJZ0_BOVIN	CYT	CYT	16.06	NUC	15.71	EXC	9.328	31.66
E1BK01	TR|E1BK01|E1BK01_BOVIN	EXC	EXC	55.75	PLA	8.703	CYT	7.873	34.13
E1BK11	TR|E1BK11|E1BK11_BOVIN	NUC	NUC	14.79	PLA	14.42	CYT	12.37	29.1
E1BK14	TR|E1BK14|E1BK14_BOVIN	CYT	CYT	27.22	PLA	24.86	NUC	9.276	50.85
E1BK20	TR|E1BK20|E1BK20_BOVIN	CYT	CYT	13.96	NUC	11.12	PLA	10.69	24.36
E1BK29	TR|E1BK29|E1BK29_BOVIN	NUC	NUC	16.84	CYT	14.26	PLA	11.29	30.29
E1BK30	TR|E1BK30|E1BK30_BOVIN	EXC	EXC	26.95	PLA	12.4	NUC	8.854	33.62
E1BK33	TR|E1BK33|E1BK33_BOVIN	PLA	PLA	28.84	JNC	26.94	NUC	10.55	54.72
E1BK41	TR|E1BK41|E1BK41_BOVIN	EXC	EXC	41.05	NUC	9.033	PLA	7.595	34.05
E1BK57	TR|E1BK57|E1BK57_BOVIN	NUC	NUC	21.26	PLA	14.07	CYT	12.18	32.79
E1BK64	TR|E1BK64|E1BK64_BOVIN	NUC	NUC	15.16	CYT	12.1	MIT	9.93	26.43
E1BK76	TR|E1BK76|E1BK76_BOVIN	NUC	NUC	15.49	CYT	11.11	PLA	10.97	25.44
E1BK77	TR|E1BK77|E1BK77_BOVIN	NUC	NUC	15.24	CYT	13.91	PLA	11.73	28.77
E1BK86	TR|E1BK86|E1BK86_BOVIN	NUC	NUC	13.09	CYT	11.83	PLA	11.73	24.6
E1BKB4	TR|E1BKB4|E1BKB4_BOVIN	CSK	CSK	25.25	NUC	13.56	CYT	11.41	34.28
E1BKB7	TR|E1BKB7|E1BKB7_BOVIN	NUC	NUC	17.95	CYT	14.32	PLA	10.78	31.1
E1BKC3	TR|E1BKC3|E1BKC3_BOVIN	NUC	NUC	29.58	CYT	29.01	PLA	6.172	58.26
E1BKC4	TR|E1BKC4|E1BKC4_BOVIN	NUC	NUC	18.47	CYT	13.79	PLA	10.4	30.76
E1BKC5	TR|E1BKC5|E1BKC5_BOVIN	EXC	EXC	31.07	CYT	21.42	PLA	10.78	47.43
E1BKD2	TR|E1BKD2|E1BKD2_BOVIN	NUC	NUC	17.17	CYT	13.18	PLA	11.74	29.14
E1BKE9	TR|E1BKE9|E1BKE9_BOVIN	NUC	NUC	39.74	CYT	11.2	PLA	8.301	36.41
E1BKH1	TR|E1BKH1|E1BKH1_BOVIN	NUC	NUC	11.01	CYT	10.36	EXC	10.15	21.23
E1BKH3	TR|E1BKH3|E1BKH3_BOVIN	EXC	EXC	13.71	END	13.26	CYT	11.9	26.84
E1BKI8	TR|E1BKI8|E1BKI8_BOVIN	PLA	PLA	47.93	NUC	9.395	CYT	8.283	35.23
E1BKI9	TR|E1BKI9|E1BKI9_BOVIN	PLA	PLA	13.93	NUC	12.51	CYT	11.65	26.06
E1BKJ1	TR|E1BKJ1|E1BKJ1_BOVIN	NUC	NUC	28.14	CYT	25.74	PLA	8.388	52.59
E1BKJ5	TR|E1BKJ5|E1BKJ5_BOVIN	NUC	NUC	46.71	CYT	8.111	PLA	6.819	33.66
E1BKJ8	TR|E1BKJ8|E1BKJ8_BOVIN	CYT	CYT	48.09	NUC	7.365	CSK	6.483	32.87
E1BKK3	TR|E1BKK3|E1BKK3_BOVIN	PLA	PLA	56.78	NUC	8.291	CYT	7.155	33.52
E1BKM6	TR|E1BKM6|E1BKM6_BOVIN	CYT	CYT	33.72	NUC	13.58	PLA	13.55	37.78
E1BKM9	TR|E1BKM9|E1BKM9_BOVIN	NUC	NUC	43.35	CYT	8.979	PLA	7.368	34.34
E1BKP0	TR|E1BKP0|E1BKP0_BOVIN	PLA	PLA	14.02	NUC	12.57	CYT	11.79	26.2
E1BKP7	TR|E1BKP7|E1BKP7_BOVIN	PLA	PLA	20.62	NUC	13.04	CYT	12.48	31.1
E1BKQ4	TR|E1BKQ4|E1BKQ4_BOVIN	EXC	EXC	18.15	NUC	14.07	PLA	12.84	30.9
E1BKQ6	TR|E1BKQ6|E1BKQ6_BOVIN	CYT	CYT	37.64	NUC	12.82	PLA	8.285	37.93
E1BKQ8	TR|E1BKQ8|E1BKQ8_BOVIN	NUC	NUC	41.26	CYT	9.619	PLA	8.708	34.78
E1BKR3	TR|E1BKR3|E1BKR3_BOVIN	NUC	NUC	39.18	CYT	8.701	PLA	7.29	33.29
E1BKR6	TR|E1BKR6|E1BKR6_BOVIN	PLA	PLA	56.67	NUC	6.739	CYT	5.984	31.75
E1BKS5	TR|E1BKS5|E1BKS5_BOVIN	PLA	PLA	13.16	CYT	12.97	NUC	11.26	26.08
E1BKU9	TR|E1BKU9|E1BKU9_BOVIN	CYT	CYT	13.45	NUC	12.43	PLA	12.41	25.62
E1BKV9	TR|E1BKV9|E1BKV9_BOVIN	NUC	NUC	15.78	CYT	12.36	PLA	11	27.18
E1BKX1	TR|E1BKX1|E1BKX1_BOVIN	CYT	CYT	11.22	NUC	11.13	PLA	10.14	22.33
E1BKY8	TR|E1BKY8|E1BKY8_BOVIN	CYT	CYT	28.24	NUC	13.8	PLA	11.68	35.98
E1BKZ0	TR|E1BKZ0|E1BKZ0_BOVIN	CSK	CSK	16.61	NUC	16.32	CYT	14.71	32.83
E1BKZ3	TR|E1BKZ3|E1BKZ3_BOVIN	NUC	NUC	16.83	CYT	14.7	CSK	10.82	30.86
E1BL01	TR|E1BL01|E1BL01_BOVIN	NUC	NUC	18.15	PLA	16.19	CYT	15.22	33.67
E1BL03	TR|E1BL03|E1BL03_BOVIN	NUC	NUC	14.5	CYT	13.1	CSK	9.539	27.22
E1BL06	TR|E1BL06|E1BL06_BOVIN	NUC	NUC	29.12	CYT	12.87	PLA	10.4	35.17
E1BL08	TR|E1BL08|E1BL08_BOVIN	CYT	CYT	43.87	NUC	10.82	PLA	7.11	36.61
E1BL29	TR|E1BL29|E1BL29_BOVIN	CYT	CYT	59.83	MIT	5.305	NUC	4.687	29.62
E1BL62	TR|E1BL62|E1BL62_BOVIN	CYT	CYT	21.89	NUC	10.59	EXC	9.599	28.8
E1BL63	TR|E1BL63|E1BL63_BOVIN	PLA	PLA	14.6	NUC	12.09	CYT	11.3	26.02
E1BL87	TR|E1BL87|E1BL87_BOVIN	PLA	PLA	61.37	NUC	7.233	CYT	5.696	31.46
E1BLA5	TR|E1BLA5|E1BLA5_BOVIN	NUC	NUC	17.92	CYT	14.96	PLA	10.42	31.9
E1BLB1	TR|E1BLB1|E1BLB1_BOVIN	NUC	NUC	16.08	CYT	11.01	PLA	9.74	25.72
E1BLB3	TR|E1BLB3|E1BLB3_BOVIN	NUC	NUC	19.29	CYT	12.11	MIT	9.146	29.14
E1BLB4	TR|E1BLB4|E1BLB4_BOVIN	CSK	CSK	33.26	NUC	10.19	CYT	9.393	33.42
E1BLB5	TR|E1BLB5|E1BLB5_BOVIN	CYT	CYT	44.54	NUC	10.75	PLA	9.153	36.61
E1BLB6	TR|E1BLB6|E1BLB6_BOVIN	NUC	NUC	36.87	CYT	9.391	PLA	8.573	33.55
E1BLD1	TR|E1BLD1|E1BLD1_BOVIN	NUC	NUC	15.9	CYT	13.81	PLA	11.59	29.08
E1BLF1	TR|E1BLF1|E1BLF1_BOVIN	CYT	CYT	31.75	NUC	11.55	PLA	9.7	34.55
E1BLF5	TR|E1BLF5|E1BLF5_BOVIN	NUC	NUC	22.84	CYT	12.63	PLA	9.781	31.85
E1BLF9	TR|E1BLF9|E1BLF9_BOVIN	EXC	EXC	17.16	PLA	14.74	END	10.22	31.13
E1BLH0	TR|E1BLH0|E1BLH0_BOVIN	PLA	PLA	51.42	NUC	8.736	CYT	7.121	34.48
E1BLI8	TR|E1BLI8|E1BLI8_BOVIN	NUC	NUC	18.17	CYT	15.87	PLA	10.84	33.26
E1BLK1	TR|E1BLK1|E1BLK1_BOVIN	NUC	NUC	19.83	CYT	15.51	PLA	13.14	33.81
E1BLN1	TR|E1BLN1|E1BLN1_BOVIN	NUC	NUC	31.93	CYT	13.34	CSK	9.867	36.85
E1BLN6	TR|E1BLN6|E1BLN6_BOVIN	CYT	CYT	19.87	NUC	11.32	PLA	9.627	28.52
E1BLQ7	TR|E1BLQ7|E1BLQ7_BOVIN	NUC	NUC	14.42	CYT	13.39	EXC	12.55	27.52
E1BLQ9	TR|E1BLQ9|E1BLQ9_BOVIN	CYT	CYT	17.55	NUC	14.38	MIT	12.27	30.91
E1BLR2	TR|E1BLR2|E1BLR2_BOVIN	NUC	NUC	33.45	CSK	29.08	CYT	7.411	59.8
E1BLR9	TR|E1BLR9|E1BLR9_BOVIN	PLA	PLA	31.99	NUC	25.87	EXC	9.309	54.31
E1BLS8	TR|E1BLS8|E1BLS8_BOVIN	EXC	EXC	38.23	NUC	11.8	PLA	10.72	36.81
E1BLT3	TR|E1BLT3|E1BLT3_BOVIN	CYT	CYT	18.56	CSK	16.75	NUC	13.83	34.67
E1BLT9	TR|E1BLT9|E1BLT9_BOVIN	NUC	NUC	17.1	PLA	16.1	CYT	14.86	32.87
E1BLW3	TR|E1BLW3|E1BLW3_BOVIN	NUC	NUC	14.02	CYT	12.98	PLA	12.31	26.72
E1BLX1	TR|E1BLX1|E1BLX1_BOVIN	CSK	CSK	41.82	NUC	9.136	CYT	8.585	34.3
E1BLY0	TR|E1BLY0|E1BLY0_BOVIN	NUC	NUC	21.11	CYT	14.29	PLA	13.75	32.99
E1BM00	TR|E1BM00|E1BM00_BOVIN	NUC	NUC	20.16	CYT	15.68	PLA	12.39	34.23
E1BM04	TR|E1BM04|E1BM04_BOVIN	NUC	NUC	18.14	CYT	16.35	PLA	11.69	33.87
E1BM27	TR|E1BM27|E1BM27_BOVIN	CYT	CYT	26.59	NUC	13.51	PLA	10.75	34.86
E1BM29	TR|E1BM29|E1BM29_BOVIN	END	END	54.38	NUC	6.657	CYT	6.379	31.91
E1BM39	TR|E1BM39|E1BM39_BOVIN	CYT	CYT	40.34	NUC	10.6	PLA	8.759	35.79
E1BM44	TR|E1BM44|E1BM44_BOVIN	NUC	NUC	17.03	CYT	14.76	PLA	10.45	31.07
E1BM45	TR|E1BM45|E1BM45_BOVIN	END	END	27.68	PLA	11.03	CYT	8.664	32.27
E1BM47	TR|E1BM47|E1BM47_BOVIN	NUC	NUC	14.45	PLA	12.68	CYT	12.63	26.65
E1BM89	TR|E1BM89|E1BM89_BOVIN	NUC	NUC	18.4	CYT	15.13	PLA	11.87	32.43
E1BM91	TR|E1BM91|E1BM91_BOVIN	PLA	PLA	15.7	NUC	12.9	CYT	12.71	27.8
E1BM93	TR|E1BM93|E1BM93_BOVIN	END	END	26.92	PLA	12.67	NUC	11.04	33.96
E1BMB2	TR|E1BMB2|E1BMB2_BOVIN	PLA	PLA	18.27	CYT	12.36	NUC	10.82	28.82
E1BMB4	TR|E1BMB4|E1BMB4_BOVIN	NUC	NUC	16.59	MIT	12.25	EXC	12.03	27.6
E1BMB5	TR|E1BMB5|E1BMB5_BOVIN	CYT	CYT	31.31	NUC	13.92	PLA	8.003	37.36
E1BMB8	TR|E1BMB8|E1BMB8_BOVIN	NUC	NUC	17.26	CYT	14.23	CSK	12.18	30.53
E1BMC0	TR|E1BMC0|E1BMC0_BOVIN	NUC	NUC	13.88	CYT	13.15	PLA	10.92	26.83
E1BMD1	TR|E1BMD1|E1BMD1_BOVIN	NUC	NUC	14.78	CYT	14.76	PLA	10.32	29.53
E1BMD4	TR|E1BMD4|E1BMD4_BOVIN	NUC	NUC	15.66	CYT	13.6	PLA	13.16	28.66
E1BME2	TR|E1BME2|E1BME2_BOVIN	NUC	NUC	18.72	CYT	14.7	PLA	13.12	32.07
E1BME6	TR|E1BME6|E1BME6_BOVIN	MIT	MIT	42.25	CYT	7.846	NUC	7.831	32.86
E1BMG4	TR|E1BMG4|E1BMG4_BOVIN	CYT	CYT	23.94	PLA	19.55	NUC	10.6	41.58
E1BMG8	TR|E1BMG8|E1BMG8_BOVIN	CYT	CYT	18.75	NUC	14.11	PLA	8.781	31.33
E1BMI6	TR|E1BMI6|E1BMI6_BOVIN	NUC	NUC	33.41	CYT	12.14	PLA	8.725	35.86
E1BMJ2	TR|E1BMJ2|E1BMJ2_BOVIN	NUC	NUC	16.93	CYT	14.08	PLA	12.6	30.13
E1BMK1	TR|E1BMK1|E1BMK1_BOVIN	PLA	PLA	49.37	NUC	6.71	CYT	6.45	32.16
E1BMM2	TR|E1BMM2|E1BMM2_BOVIN	GOL	GOL	62.41	NUC	5.546	CYT	4.984	29.31
E1BMM8	TR|E1BMM8|E1BMM8_BOVIN	PLA	PLA	15.53	NUC	15.5	CYT	13.64	31.02
E1BMN0	TR|E1BMN0|E1BMN0_BOVIN	PLA	PLA	22.47	LYS	18.14	NUC	9.634	38.85
E1BMN1	TR|E1BMN1|E1BMN1_BOVIN	PLA	PLA	17.54	NUC	14.13	CYT	12.63	30.59
E1BMN7	TR|E1BMN7|E1BMN7_BOVIN	NUC	NUC	15.98	CYT	13.83	PLA	12.45	29.17
E1BMN9	TR|E1BMN9|E1BMN9_BOVIN	NUC	NUC	19.88	CYT	14.39	PLA	12.15	32.39
E1BMP1	TR|E1BMP1|E1BMP1_BOVIN	NUC	NUC	16.9	CYT	12.97	PLA	11.3	28.7
E1BMP4	TR|E1BMP4|E1BMP4_BOVIN	NUC	NUC	16.85	CYT	14.36	PLA	13.04	30.43
E1BMP8	TR|E1BMP8|E1BMP8_BOVIN	NUC	NUC	23.22	CYT	11.72	PLA	11.32	30.93
E1BMP9	TR|E1BMP9|E1BMP9_BOVIN	CYT/PLA	CYT	32.01	PLA	31.78	NUC	7.14	63.64
E1BMQ1	TR|E1BMQ1|E1BMQ1_BOVIN	CYT/END	CYT	31.04	END	30.57	NUC	6.814	61.32
E1BMR2	TR|E1BMR2|E1BMR2_BOVIN	NUC	NUC	18.5	CYT	14.07	PLA	12.22	31.12
E1BMR3	TR|E1BMR3|E1BMR3_BOVIN	NUC	NUC	19.42	CYT	12.2	MIT	8.24	29.34
E1BMR7	TR|E1BMR7|E1BMR7_BOVIN	MIT	MIT	40.19	NUC	10.08	PLA	8.812	35.14
E1BMS0	TR|E1BMS0|E1BMS0_BOVIN	NUC	NUC	16.9	CYT	16.6	PLA	11.93	33.39
E1BMS9	TR|E1BMS9|E1BMS9_BOVIN	NUC	NUC	19.67	CYT	14.39	PLA	10.6	32.27
E1BMV3	TR|E1BMV3|E1BMV3_BOVIN	EXC	EXC	41.88	CYT	10.39	NUC	10.14	35.81
E1BMV7	TR|E1BMV7|E1BMV7_BOVIN	EXC	EXC	15.12	NUC	12.08	CYT	10.4	26.37
E1BMW9	TR|E1BMW9|E1BMW9_BOVIN	NUC	NUC	38.36	CYT	11.86	PLA	10.67	36.92
E1BMX1	TR|E1BMX1|E1BMX1_BOVIN	PLA	PLA	25.32	EXC	13.68	NUC	12.52	34.46
E1BMY0	TR|E1BMY0|E1BMY0_BOVIN	CYT	CYT	17.61	NUC	16.73	PLA	9.824	34.04
E1BMZ8	TR|E1BMZ8|E1BMZ8_BOVIN	CYT	CYT	49.31	NUC	10.21	PLA	5.659	36.24
E1BN18	TR|E1BN18|E1BN18_BOVIN	PLA	PLA	49.31	EXC	9.355	NUC	8.822	35.22
E1BN25	TR|E1BN25|E1BN25_BOVIN	NUC	NUC	46.57	CYT	10.54	PLA	7.331	36.53
E1BN28	TR|E1BN28|E1BN28_BOVIN	NUC	NUC	20.38	CYT	16.49	PLA	12.6	35.43
E1BN44	TR|E1BN44|E1BN44_BOVIN	NUC	NUC	32.39	CYT	12.42	PLA	10.48	35.86
E1BN52	TR|E1BN52|E1BN52_BOVIN	EXC	EXC	24.1	NUC	10.21	PLA	9.75	29.55
E1BN69	TR|E1BN69|E1BN69_BOVIN	PLA	PLA	20.52	CYT	15.77	NUC	13.48	34.57
E1BN90	TR|E1BN90|E1BN90_BOVIN	NUC	NUC	29.92	CYT	16.45	EXC	6.888	40.13
E1BN92	TR|E1BN92|E1BN92_BOVIN	NUC	NUC	20.16	CYT	15.04	PLA	11.89	33.4
E1BN98	TR|E1BN98|E1BN98_BOVIN	CYT	CYT	38.07	PLA	19.62	GOL	6.717	47.04
E1BNB2	TR|E1BNB2|E1BNB2_BOVIN	NUC	NUC	10.54	EXC	9.873	PLA	9.714	20.28
E1BNB7	TR|E1BNB7|E1BNB7_BOVIN	JNC	JNC	25.88	CSK	25.86	CYT	10.5	51.73
E1BNC9	TR|E1BNC9|E1BNC9_BOVIN	CSK	CSK	36.81	NUC	11.05	PLA	10.23	35.53
E1BND0	TR|E1BND0|E1BND0_BOVIN	NUC	NUC	15.44	CYT	13.96	PLA	12.48	28.96
E1BND2	TR|E1BND2|E1BND2_BOVIN	NUC	NUC	14.87	CYT	12.4	PLA	11.66	26.59
E1BND5	TR|E1BND5|E1BND5_BOVIN	NUC	NUC	42.55	CYT	10.42	PLA	8.461	35.95
E1BND6	TR|E1BND6|E1BND6_BOVIN	PLA	PLA	20.53	JNC	15.83	CYT	13.21	34.65
E1BNE0	TR|E1BNE0|E1BNE0_BOVIN	CYT	CYT	30.71	NUC	29.13	PLA	10.25	58.9
E1BNE5	TR|E1BNE5|E1BNE5_BOVIN	CYT	CYT	21.78	NUC	15.71	MIT	15.26	35.22
E1BNF6	TR|E1BNF6|E1BNF6_BOVIN	NUC	NUC	43.14	CYT	9.837	PLA	8.257	35.33
E1BNG7	TR|E1BNG7|E1BNG7_BOVIN	CSK	CSK	43.22	NUC	9.511	CYT	7.827	34.96
E1BNH3	TR|E1BNH3|E1BNH3_BOVIN	CYT	CYT	28.66	PLA	26.7	NUC	9.815	54.27
E1BNH5	TR|E1BNH5|E1BNH5_BOVIN	CYT	CYT	38.64	NUC	10.81	PLA	8.368	35.69
E1BNI4	TR|E1BNI4|E1BNI4_BOVIN	PLA	PLA	15.51	NUC	10.41	MIT	9.603	24.6
E1BNJ1	TR|E1BNJ1|E1BNJ1_BOVIN	PLA	PLA	13.99	NUC	11.34	EXC	11.15	24.67
E1BNK1	TR|E1BNK1|E1BNK1_BOVIN	NUC	NUC	17.91	CYT	14.93	CSK	9.906	31.86
E1BNK6	TR|E1BNK6|E1BNK6_BOVIN	NUC	NUC	23.19	CYT	16.79	PLA	9.839	37.42
E1BNL0	TR|E1BNL0|E1BNL0_BOVIN	NUC	NUC	19.24	CYT	13.26	PLA	10.11	30.55
E1BNL1	TR|E1BNL1|E1BNL1_BOVIN	PLA	PLA	36.48	NUC	9.77	CYT	9.1	33.9
E1BNL7	TR|E1BNL7|E1BNL7_BOVIN	CSK	CSK	22.84	JNC	21.01	NUC	12.96	43.05
E1BNM2	TR|E1BNM2|E1BNM2_BOVIN	PLA	PLA	53.95	NUC	6.068	CYT	5.801	31.28
E1BNM6	TR|E1BNM6|E1BNM6_BOVIN	NUC/CYT	NUC	34.97	CYT	32.66	PLA	6.641	66.07
E1BNM7	TR|E1BNM7|E1BNM7_BOVIN	NUC	NUC	24.55	CYT	17	EXC	9.159	38.41
E1BNN0	TR|E1BNN0|E1BNN0_BOVIN	CYT	CYT	30.52	PLA	28.63	NUC	10.63	58.02
E1BNN5	TR|E1BNN5|E1BNN5_BOVIN	NUC	NUC	17.44	CYT	15.65	CSK	14.28	32.5
E1BNN6	TR|E1BNN6|E1BNN6_BOVIN	NUC	NUC	19.15	CYT	18.04	PLA	9.88	36.77
E1BNP8	TR|E1BNP8|E1BNP8_BOVIN	NUC	NUC	57.02	CYT	7.593	PLA	5.941	32.68
E1BNQ0	TR|E1BNQ0|E1BNQ0_BOVIN	END	END	37.12	NUC	8.974	PLA	8.203	33.12
E1BNQ2	TR|E1BNQ2|E1BNQ2_BOVIN	NUC	NUC	22.11	CYT	13.87	PLA	11.07	33.01
E1BNQ6	TR|E1BNQ6|E1BNQ6_BOVIN	CYT	CYT	40.31	NUC	10.24	PLA	6.093	35.35
E1BNR0	TR|E1BNR0|E1BNR0_BOVIN	EXC	EXC	24.7	NUC	11.54	CYT	11.03	31.47
E1BNS8	TR|E1BNS8|E1BNS8_BOVIN	CYT	CYT	32.33	NUC	26.96	PLA	8.058	56.11
E1BNT2	TR|E1BNT2|E1BNT2_BOVIN	CYT	CYT	28.71	PLA	28.5	NUC	9.4	57.09
E1BNV1	TR|E1BNV1|E1BNV1_BOVIN	NUC	NUC	15.66	CYT	12.56	PLA	9.479	27.35
E1BNV7	TR|E1BNV7|E1BNV7_BOVIN	CYT	CYT	35.01	NUC	12.13	CSK	8.947	36.36
E1BNX6	TR|E1BNX6|E1BNX6_BOVIN	GOL/PLA	GOL	33.77	PLA	31.7	CYT	4.978	64.11
E1BNY1	TR|E1BNY1|E1BNY1_BOVIN	PLA	PLA	14.15	NUC	12.05	MIT	11.51	25.66
E1BNY2	TR|E1BNY2|E1BNY2_BOVIN	NUC	NUC	16.9	CYT	14.27	PLA	10.89	30.35
E1BNY3	TR|E1BNY3|E1BNY3_BOVIN	PLA	PLA	49.4	NUC	6.928	CYT	6.486	32.4
E1BNY7	TR|E1BNY7|E1BNY7_BOVIN	NUC	NUC	17.49	CYT	16.34	CSK	10.17	33.44
E1BNY8	TR|E1BNY8|E1BNY8_BOVIN	NUC	NUC	37.83	CYT	10.19	PLA	8.697	34.75
E1BNY9	TR|E1BNY9|E1BNY9_BOVIN	NUC/CYT	NUC	32.13	CYT	31.21	PLA	6.725	62.76
E1BNZ0	TR|E1BNZ0|E1BNZ0_BOVIN	NUC	NUC	16.11	CYT	14.5	PLA	12.06	30.12
E1BP04	TR|E1BP04|E1BP04_BOVIN	NUC	NUC	14.84	CYT	13.7	PLA	9.156	28.22
E1BP05	TR|E1BP05|E1BP05_BOVIN	EXC	EXC	34.98	NUC	8.463	PLA	8.451	31.92
E1BP09	TR|E1BP09|E1BP09_BOVIN	CYT	CYT	17.54	NUC	16.82	PLA	16.05	34.11
E1BP14	TR|E1BP14|E1BP14_BOVIN	NUC	NUC	17.46	CYT	15.53	PLA	13.56	32.35
E1BP31	TR|E1BP31|E1BP31_BOVIN	NUC	NUC	16.51	CYT	15.8	PLA	11.7	32.08
E1BP50	TR|E1BP50|E1BP50_BOVIN	NUC	NUC	22.98	CSK	15.48	PLA	11.66	35.58
E1BP51	TR|E1BP51|E1BP51_BOVIN	NUC	NUC	14.26	CYT	12.07	PLA	10.49	25.75
E1BP52	TR|E1BP52|E1BP52_BOVIN	CSK	CSK	48.05	NUC	11.09	CYT	8.461	37.28
E1BP65	TR|E1BP65|E1BP65_BOVIN	NUC	NUC	26.83	CYT	14.13	PLA	11.02	35.76
E1BP70	TR|E1BP70|E1BP70_BOVIN	PLA	PLA	59.84	CYT	6.506	NUC	5.482	30.96
E1BP75	TR|E1BP75|E1BP75_BOVIN	CYT	CYT	40.53	PLA	12.52	NUC	10.06	38.19
E1BP91	TR|E1BP91|E1BP91_BOVIN	CYT	CYT	29.68	NUC	29.59	PLA	9.996	59.22
E1BP93	TR|E1BP93|E1BP93_BOVIN	NUC	NUC	15.59	CYT	14.63	PLA	10.91	29.93
E1BPA0	TR|E1BPA0|E1BPA0_BOVIN	PLA	PLA	56.5	CYT	11.72	NUC	5.189	37.67
E1BPB4	TR|E1BPB4|E1BPB4_BOVIN	PLA	PLA	19.8	CYT	13.17	NUC	11.91	30.78
E1BPB5	TR|E1BPB5|E1BPB5_BOVIN	NUC	NUC	20.76	CYT	14.99	PLA	14.62	33.68
E1BPC2	TR|E1BPC2|E1BPC2_BOVIN	NUC	NUC	16.49	CYT	13.78	PLA	11.66	29.45
E1BPC3	TR|E1BPC3|E1BPC3_BOVIN	PLA	PLA	42.41	CYT	10.47	NUC	7.586	35.99
E1BPC9	TR|E1BPC9|E1BPC9_BOVIN	PLA	PLA	50.1	NUC	7.717	EXC	6.709	33.31
E1BPD7	TR|E1BPD7|E1BPD7_BOVIN	NUC	NUC	23.73	CYT	12.54	PLA	9.747	32.22
E1BPE2	TR|E1BPE2|E1BPE2_BOVIN	CYT/PLA	CYT	32.12	PLA	31.24	NUC	8.068	62.81
E1BPG1	TR|E1BPG1|E1BPG1_BOVIN	NUC	NUC	16.5	CYT	14.3	PLA	10.96	30.12
E1BPH4	TR|E1BPH4|E1BPH4_BOVIN	CYT	CYT	27.69	NUC	11.04	PLA	8.794	32.28
E1BPK1	TR|E1BPK1|E1BPK1_BOVIN	NUC	NUC	16.54	CYT	15.81	PLA	11.78	32.11
E1BPK4	TR|E1BPK4|E1BPK4_BOVIN	NUC	NUC	16.64	CYT	13.85	CSK	10.14	29.64
E1BPK6	TR|E1BPK6|E1BPK6_BOVIN	CYT	CYT	39.53	CSK	15.13	NUC	9.259	41.33
E1BPL3	TR|E1BPL3|E1BPL3_BOVIN	PLA	PLA	14.34	NUC	12.48	MIT	11.92	26.32
E1BPL5	TR|E1BPL5|E1BPL5_BOVIN	NUC	NUC	47.06	CYT	8.83	PLA	6.55	34.52
E1BPL6	TR|E1BPL6|E1BPL6_BOVIN	NUC	NUC	22.69	CYT	14	PLA	12.44	33.49
E1BPM4	TR|E1BPM4|E1BPM4_BOVIN	NUC	NUC	30.13	CYT	17.77	PLA	8.943	41.98
E1BPM7	TR|E1BPM7|E1BPM7_BOVIN	PLA	PLA	22.82	JNC	20.45	NUC	14.77	42.25
E1BPQ8	TR|E1BPQ8|E1BPQ8_BOVIN	NUC	NUC	48.39	PLA	8.046	CYT	7.701	33.67
E1BPS5	TR|E1BPS5|E1BPS5_BOVIN	PLA	PLA	34.04	NUC	9.192	CYT	8.765	32.49
E1BPS6	TR|E1BPS6|E1BPS6_BOVIN	NUC	NUC	14.9	PLA	14.1	CYT	11.98	28.77
E1BPT0	TR|E1BPT0|E1BPT0_BOVIN	NUC	NUC	17.31	CYT	15.78	PLA	11.85	32.58
E1BPU3	TR|E1BPU3|E1BPU3_BOVIN	CYT	CYT	27.64	POX	23.85	NUC	10.67	49.54
E1BPU6	TR|E1BPU6|E1BPU6_BOVIN	NUC	NUC	41.43	CYT	10.45	PLA	8.666	35.81
E1BPU9	TR|E1BPU9|E1BPU9_BOVIN	PLA	PLA	56.49	JNC	9.531	CYT	5.401	35.02
E1BPV6	TR|E1BPV6|E1BPV6_BOVIN	NUC	NUC	25.81	CSK	16.19	CYT	12.59	37.96
E1BPV7	TR|E1BPV7|E1BPV7_BOVIN	EXC	EXC	34.64	PLA	13.69	NUC	10.15	38.21
E1BPW2	TR|E1BPW2|E1BPW2_BOVIN	NUC	NUC	18.88	CYT	16.64	CSK	10.93	34.72
E1BPX6	TR|E1BPX6|E1BPX6_BOVIN	NUC	NUC	26.47	PLA	10.76	CYT	9.63	31.38
E1BPX9	TR|E1BPX9|E1BPX9_BOVIN	NUC	NUC	24.77	MIT	21.98	CYT	10.19	45.45
E1BPZ1	TR|E1BPZ1|E1BPZ1_BOVIN	PLA	PLA	15.67	CYT	11.37	NUC	10.75	25.88
E1BPZ8	TR|E1BPZ8|E1BPZ8_BOVIN	END	END	19.16	PLA	14.86	NUC	11.69	32.56
E1BPZ9	TR|E1BPZ9|E1BPZ9_BOVIN	NUC	NUC	18.85	CYT	14.73	PLA	13.5	32.19
E1BQ11	TR|E1BQ11|E1BQ11_BOVIN	NUC	NUC	14.31	CYT	13.03	PLA	11.21	26.99
E1BQ12	TR|E1BQ12|E1BQ12_BOVIN	PLA	PLA	59.03	NUC	7.389	CYT	6.222	32.12
E1BQ15	TR|E1BQ15|E1BQ15_BOVIN	CSK	CSK	27.71	GOL	27.32	NUC	8.615	54.82
E1BQ24	TR|E1BQ24|E1BQ24_BOVIN	NUC	NUC	16.16	CYT	14.5	PLA	13.09	30.15
E1U8D1	TR|E1U8D1|E1U8D1_BOVIN	CYT	CYT	15.99	NUC	14.91	EXC	10.17	30.57
F1MAU2	TR|F1MAU2|F1MAU2_BOVIN	PLA	PLA	14.06	NUC	12.99	CYT	11.75	26.75
F1MAZ8	TR|F1MAZ8|F1MAZ8_BOVIN	CYT	CYT	21.38	PLA	18.33	CSK	18.23	38.51
F1MB32	TR|F1MB32|F1MB32_BOVIN	EXC	EXC	30.62	NUC	10.66	CYT	9.555	33.04
F1MB52	TR|F1MB52|F1MB52_BOVIN	CYT	CYT	41.83	NUC	8.606	EXC	7.387	33.68
F1MB71	TR|F1MB71|F1MB71_BOVIN	CYT	CYT	31.42	NUC	15.82	PLA	10.89	39.87
F1MBB0	TR|F1MBB0|F1MBB0_BOVIN	NUC	NUC	47.13	CYT	12.05	PLA	8.997	38.41
F1MBF2	TR|F1MBF2|F1MBF2_BOVIN	NUC	NUC	16.84	CYT	12.9	PLA	12.62	28.57
F1MBG3	TR|F1MBG3|F1MBG3_BOVIN	EXC	EXC	35.72	PLA	17.09	NUC	10.71	42.97
F1MBI8	TR|F1MBI8|F1MBI8_BOVIN	PLA	PLA	28.17	JNC	25.34	NUC	11.15	51.99
F1MBJ3	TR|F1MBJ3|F1MBJ3_BOVIN	EXC	EXC	22.49	NUC	11.08	CYT	10.54	29.74
F1MBL2	TR|F1MBL2|F1MBL2_BOVIN	CYT	CYT	21.82	NUC	17.34	MIT	16.63	37.4
F1MBL6	TR|F1MBL6|F1MBL6_BOVIN	CYT/NUC	CYT	33.34	NUC	33.13	PLA	5.461	66.33
F1MBQ5	TR|F1MBQ5|F1MBQ5_BOVIN	GOL	GOL	28.44	NUC	11.51	CYT	9.48	33.19
F1MBR6	TR|F1MBR6|F1MBR6_BOVIN	NUC	NUC	16.56	PLA	15.7	CYT	13.34	31.99
F1MBS9	TR|F1MBS9|F1MBS9_BOVIN	NUC	NUC	49.76	CYT	8.672	EXC	5.795	34.42
F1MBT6	TR|F1MBT6|F1MBT6_BOVIN	NUC	NUC	18.04	CYT	14.33	PLA	13.3	31.17
F1MBU9	TR|F1MBU9|F1MBU9_BOVIN	NUC	NUC	15.5	CYT	13.1	PLA	11.41	27.91
F1MC13	TR|F1MC13|F1MC13_BOVIN	EXC	EXC	39.45	NUC	9.092	PLA	8.379	33.81
F1MC23	TR|F1MC23|F1MC23_BOVIN	PLA	PLA	53.07	CYT	7.581	NUC	6.889	33.06
F1MC26	TR|F1MC26|F1MC26_BOVIN	NUC	NUC	16.01	CYT	13.64	PLA	11.5	28.95
F1MC27	TR|F1MC27|F1MC27_BOVIN	NUC	NUC	19.14	PLA	15.23	CYT	14.96	33.03
F1MC28	TR|F1MC28|F1MC28_BOVIN	CYT	CYT	17.51	NUC	16.58	PLA	11.71	33.78
F1MC39	TR|F1MC39|F1MC39_BOVIN	NUC	NUC	59.02	CYT	6.363	PLA	4.723	30.95
F1MC41	TR|F1MC41|F1MC41_BOVIN	CYT	CYT	25.5	NUC	13.97	PLA	11.51	34.92
F1MC50	TR|F1MC50|F1MC50_BOVIN	CYT	CYT	37.41	NUC	12.84	PLA	7.872	37.9
F1MC90	TR|F1MC90|F1MC90_BOVIN	NUC	NUC	26.94	CYT	24.86	PLA	7.457	50.72
F1MCB3	TR|F1MCB3|F1MCB3_BOVIN	PLA	PLA	42.32	NUC	8.852	EXC	7.743	34.05
F1MCF4	TR|F1MCF4|F1MCF4_BOVIN	NUC	NUC	16.42	PLA	16.04	EXC	11.82	32.33
F1MCG9	TR|F1MCG9|F1MCG9_BOVIN	CYT	CYT	26.69	PLA	24.99	NUC	9.336	50.8
F1MCK2	TR|F1MCK2|F1MCK2_BOVIN	NUC	NUC	64.39	CYT	5.904	PLA	3.978	29.18
F1MCK5	TR|F1MCK5|F1MCK5_BOVIN	CYT	CYT	11.97	NUC	11.5	PLA	10.84	23.36
F1MCL3	TR|F1MCL3|F1MCL3_BOVIN	JNC/PLA	JNC	39.84	PLA	39.57	NUC	3.468	79.2
F1MCL6	TR|F1MCL6|F1MCL6_BOVIN	NUC	NUC	15.43	CYT	13.4	PLA	11.49	28.24
F1MCL8	TR|F1MCL8|F1MCL8_BOVIN	JNC	JNC	23.25	NUC	14.13	CYT	11.58	33.97
F1MCM2	TR|F1MCM2|F1MCM2_BOVIN	JNC/PLA	JNC	41.11	PLA	40.45	CYT	2.786	81.02
F1MCQ7	TR|F1MCQ7|F1MCQ7_BOVIN	PLA	PLA	24.56	NUC	15.28	CYT	11.06	36.14
F1MCU5	TR|F1MCU5|F1MCU5_BOVIN	PLA	PLA	16.19	NUC	15.75	CYT	13.81	31.79
F1MCY0	TR|F1MCY0|F1MCY0_BOVIN	CYT	CYT	30.3	NUC	13.12	PLA	9.496	35.96
F1MD13	TR|F1MD13|F1MD13_BOVIN	PLA	PLA	16.21	NUC	11.48	CYT	11.22	26.38
F1MD34	TR|F1MD34|F1MD34_BOVIN	NUC	NUC	16.08	CYT	13.77	PLA	11.71	29.16
F1MD37	TR|F1MD37|F1MD37_BOVIN	CYT	CYT	20.91	NUC	13.6	EXC	11.13	31.99
F1MD40	TR|F1MD40|F1MD40_BOVIN	EXC	EXC	29.87	PLA	10.29	NUC	10.02	32.3
F1MD46	TR|F1MD46|F1MD46_BOVIN	NUC	NUC	50.09	CYT	7.837	PLA	7.143	33.45
F1MD64	TR|F1MD64|F1MD64_BOVIN	PLA/END	PLA	32.08	END	30.16	NUC	6.477	61.04
F1MD78	TR|F1MD78|F1MD78_BOVIN	NUC	NUC	20.36	CYT	15.26	PLA	13.52	33.8
F1MD89	TR|F1MD89|F1MD89_BOVIN	PLA	PLA	20.05	NUC	15.97	CYT	10.74	34.55
F1MD95	TR|F1MD95|F1MD95_BOVIN	NUC	NUC	14.07	CYT	13.57	PLA	11.77	27.5
F1MDD5	TR|F1MDD5|F1MDD5_BOVIN	EXC	EXC	38.64	NUC	8.499	PLA	7.723	32.93
F1MDE3	TR|F1MDE3|F1MDE3_BOVIN	CSK	CSK	43.81	CYT	12.46	NUC	8.281	38.63
F1MDF3	TR|F1MDF3|F1MDF3_BOVIN	NUC	NUC	14.45	CYT	13.97	PLA	11.44	28.28
F1MDK3	TR|F1MDK3|F1MDK3_BOVIN	NUC	NUC	30.05	CYT	28.22	PLA	9.714	57.21
F1MDL4	TR|F1MDL4|F1MDL4_BOVIN	NUC	NUC	39.21	CYT	27.17	PLA	7.566	58.39
F1MDR1	TR|F1MDR1|F1MDR1_BOVIN	NUC	NUC	18.58	CYT	15.55	PLA	13.27	33.09
F1MDR7	TR|F1MDR7|F1MDR7_BOVIN	CYT	CYT	13.21	NUC	13.13	PLA	10.2	26.32
F1MDV3	TR|F1MDV3|F1MDV3_BOVIN	NUC	NUC	14.75	PLA	14.42	CYT	12.63	29.08
F1ME21	TR|F1ME21|F1ME21_BOVIN	NUC	NUC	34.39	CYT	11.09	PLA	8.282	34.88
F1ME62	TR|F1ME62|F1ME62_BOVIN	CYT	CYT	20.7	NUC	16.44	PLA	10.31	35.56
F1ME83	TR|F1ME83|F1ME83_BOVIN	NUC	NUC	17.43	CYT	13.91	PLA	11.72	30.23
F1ME94	TR|F1ME94|F1ME94_BOVIN	NUC	NUC	40.85	CYT	15.37	PLA	7.206	41.89
F1MEB7	TR|F1MEB7|F1MEB7_BOVIN	NUC	NUC	18.39	CYT	14.24	PLA	12.91	31.28
F1MEK3	TR|F1MEK3|F1MEK3_BOVIN	NUC	NUC	21.76	CYT	16.42	PLA	13.81	36.13
F1MEM4	TR|F1MEM4|F1MEM4_BOVIN	NUC	NUC	49.68	CYT	9.672	PLA	6.961	35.61
F1MER7	TR|F1MER7|F1MER7_BOVIN	EXC	EXC	45	PLA	9.301	NUC	8.503	34.92
F1MER8	TR|F1MER8|F1MER8_BOVIN	CYT	CYT	14.7	PLA	14.06	NUC	14.02	28.58
F1MES5	TR|F1MES5|F1MES5_BOVIN	CYT	CYT	14.4	NUC	13.7	PLA	10.64	27.91
F1MET5	TR|F1MET5|F1MET5_BOVIN	CYT	CYT	26.46	NUC	14.36	PLA	10.31	35.88
F1MEV2	TR|F1MEV2|F1MEV2_BOVIN	NUC	NUC	16.7	EXC	12.93	CYT	11.24	28.51
F1MEV7	TR|F1MEV7|F1MEV7_BOVIN	EXC	EXC	37.23	PLA	14.98	CYT	9.695	40.59
F1MEW7	TR|F1MEW7|F1MEW7_BOVIN	NUC	NUC	43.47	CYT	10.97	PLA	9.775	36.75
F1MF11	TR|F1MF11|F1MF11_BOVIN	CYT	CYT	30.6	PLA	29.16	NUC	7.749	58.91
F1MF33	TR|F1MF33|F1MF33_BOVIN	NUC	NUC	13.34	CYT	12.83	MIT	9.866	26.03
F1MF35	TR|F1MF35|F1MF35_BOVIN	EXC	EXC	40.21	PLA	7.867	CYT	7.859	32.53
F1MF39	TR|F1MF39|F1MF39_BOVIN	EXC	EXC	12.34	NUC	10.87	CYT	9.643	22.87
F1MF62	TR|F1MF62|F1MF62_BOVIN	NUC	NUC	45.38	CYT	9.398	PLA	7.113	35.07
F1MF64	TR|F1MF64|F1MF64_BOVIN	PLA	PLA	31.24	JNC	29.56	CYT	8.287	59.78
F1MF87	TR|F1MF87|F1MF87_BOVIN	NUC	NUC	17.07	CYT	13.57	PLA	11.33	29.57
F1MFA3	TR|F1MFA3|F1MFA3_BOVIN	MIT	MIT	27.98	NUC	10.77	CYT	10.33	32.08
F1MFA5	TR|F1MFA5|F1MFA5_BOVIN	NUC	NUC	19.56	CYT	16	PLA	11.63	34.29
F1MFC4	TR|F1MFC4|F1MFC4_BOVIN	PLA	PLA	29.75	CYT	10.91	NUC	9.601	33
F1MFE8	TR|F1MFE8|F1MFE8_BOVIN	PLA	PLA	35.24	NUC	11.41	CYT	9.32	35.54
F1MFF8	TR|F1MFF8|F1MFF8_BOVIN	PLA	PLA	57.02	NUC	6.141	CYT	6.01	31.02
F1MFG9	TR|F1MFG9|F1MFG9_BOVIN	PLA	PLA	34.51	CYT	14.66	CSK	11.28	39.41
F1MFH3	TR|F1MFH3|F1MFH3_BOVIN	PLA	PLA	14.07	NUC	12.74	CYT	11.64	26.45
F1MFJ2	TR|F1MFJ2|F1MFJ2_BOVIN	NUC	NUC	23.66	CYT	16.11	PLA	12.43	36.77
F1MFK1	TR|F1MFK1|F1MFK1_BOVIN	CYT	CYT	39.61	NUC	13.34	PLA	9.466	39.04
F1MFK9	TR|F1MFK9|F1MFK9_BOVIN	CYT	CYT	28.16	PLA	25.42	NUC	7.261	52.12
F1MFQ4	TR|F1MFQ4|F1MFQ4_BOVIN	NUC	NUC	21.38	CYT	15.48	PLA	13.84	34.68
F1MFR1	TR|F1MFR1|F1MFR1_BOVIN	CYT	CYT	14.64	NUC	14.52	CSK	9.399	29.13
F1MFS4	TR|F1MFS4|F1MFS4_BOVIN	CYT	CYT	15.89	NUC	15.58	PLA	11.44	31.37
F1MFS5	TR|F1MFS5|F1MFS5_BOVIN	CYT	CYT	23.3	PLA	18.01	NUC	12.51	39.12
F1MFS6	TR|F1MFS6|F1MFS6_BOVIN	CYT	CYT	14.85	NUC	12.6	MIT	10.48	26.84
F1MFU7	TR|F1MFU7|F1MFU7_BOVIN	NUC	NUC	14.5	CYT	12.37	PLA	9.988	26.29
F1MFX3	TR|F1MFX3|F1MFX3_BOVIN	GOL	GOL	46.02	NUC	8.775	PLA	8.424	34.39
F1MFX6	TR|F1MFX6|F1MFX6_BOVIN	CYT	CYT	30.84	PLA	28.88	NUC	8.978	58.55
F1MFY4	TR|F1MFY4|F1MFY4_BOVIN	NUC	NUC	15.53	CYT	14.56	PLA	10.59	29.8
F1MFY5	TR|F1MFY5|F1MFY5_BOVIN	NUC	NUC	15.79	CYT	12.56	PLA	11.86	27.44
F1MFZ5	TR|F1MFZ5|F1MFZ5_BOVIN	CYT	CYT	17.42	NUC	16.1	PLA	11.09	33.08
F1MG13	TR|F1MG13|F1MG13_BOVIN	CSK	CSK	26.82	NUC	12.75	CYT	11.19	34.01
F1MG39	TR|F1MG39|F1MG39_BOVIN	NUC	NUC	17.31	CYT	13.23	PLA	12.36	29.29
F1MG74	TR|F1MG74|F1MG74_BOVIN	END	END	17.2	NUC	14.37	PLA	12.6	30.68
F1MG76	TR|F1MG76|F1MG76_BOVIN	PLA	PLA	49.55	CYT	6.542	EXC	6.394	31.97
F1MG81	TR|F1MG81|F1MG81_BOVIN	NUC	NUC	14.65	CYT	13.79	PLA	11.59	28.19
F1MG90	TR|F1MG90|F1MG90_BOVIN	NUC	NUC	14.37	PLA	13.73	CYT	13.19	27.92
F1MGB9	TR|F1MGB9|F1MGB9_BOVIN	NUC	NUC	40.31	CYT	10.9	PLA	6.979	36.16
F1MGC8	TR|F1MGC8|F1MGC8_BOVIN	CYT	CYT	11.54	EXC	10.56	NUC	10.4	21.88
F1MGC9	TR|F1MGC9|F1MGC9_BOVIN	NUC	NUC	20.47	CYT	16.67	PLA	8.903	35.73
F1MGE1	TR|F1MGE1|F1MGE1_BOVIN	PLA	PLA	15.12	NUC	13.89	CYT	11.97	28.65
F1MGF7	TR|F1MGF7|F1MGF7_BOVIN	NUC	NUC	17.39	CYT	14.69	PLA	12.18	31.22
F1MGG8	TR|F1MGG8|F1MGG8_BOVIN	PLA	PLA	30.02	NUC	15.22	CYT	12.67	38.54
F1MGH2	TR|F1MGH2|F1MGH2_BOVIN	NUC	NUC	15.58	PLA	15.32	CYT	14.51	30.81
F1MGJ5	TR|F1MGJ5|F1MGJ5_BOVIN	END	END	37.48	NUC	10.03	PLA	9.606	34.47
F1MGK9	TR|F1MGK9|F1MGK9_BOVIN	NUC	NUC	16.15	CYT	14.39	PLA	11.78	30.01
F1MGM1	TR|F1MGM1|F1MGM1_BOVIN	PLA	PLA	40.93	GOL	27.12	NUC	5.123	58.65
F1MGN0	TR|F1MGN0|F1MGN0_BOVIN	EXC	EXC	23.68	NUC	11.25	PLA	10.33	30.59
F1MGR0	TR|F1MGR0|F1MGR0_BOVIN	NUC	NUC	14.71	CYT	12.45	PLA	11.66	26.54
F1MGS0	TR|F1MGS0|F1MGS0_BOVIN	NUC	NUC	20.34	CYT	14.58	PLA	11.52	32.91
F1MGS2	TR|F1MGS2|F1MGS2_BOVIN	PLA	PLA	20.4	CYT	15.21	NUC	12.56	33.76
F1MGU5	TR|F1MGU5|F1MGU5_BOVIN	PLA	PLA	49.4	EXC	6.839	END	6.217	32.3
F1MGV0	TR|F1MGV0|F1MGV0_BOVIN	NUC	NUC	18.98	CYT	12.32	PLA	11.87	29.22
F1MGW8	TR|F1MGW8|F1MGW8_BOVIN	NUC	NUC	15.61	CYT	14.02	PLA	10.45	29.16
F1MGX4	TR|F1MGX4|F1MGX4_BOVIN	CYT	CYT	28.55	NUC	15.06	PLA	10.31	37.73
F1MGX7	TR|F1MGX7|F1MGX7_BOVIN	NUC	NUC	15.53	PLA	14.89	CYT	12.92	30.22
F1MGY6	TR|F1MGY6|F1MGY6_BOVIN	NUC	NUC	15.49	CYT	13.74	PLA	9.357	28.72
F1MH50	TR|F1MH50|F1MH50_BOVIN	NUC	NUC	15.74	CYT	13.49	PLA	11.26	28.57
F1MH56	TR|F1MH56|F1MH56_BOVIN	NUC	NUC	56.52	CYT	6.99	PLA	6.073	32.05
F1MH68	TR|F1MH68|F1MH68_BOVIN	NUC	NUC	17.34	CYT	15.1	PLA	10	31.72
F1MH71	TR|F1MH71|F1MH71_BOVIN	NUC	NUC	41.34	CYT	10.96	EXC	7.872	36.41
F1MH73	TR|F1MH73|F1MH73_BOVIN	NUC	NUC	16.56	CYT	13.73	PLA	11.58	29.44
F1MHC2	TR|F1MHC2|F1MHC2_BOVIN	CYT	CYT	19.28	PLA	15.87	NUC	13.24	33.94
F1MHE4	TR|F1MHE4|F1MHE4_BOVIN	CYT	CYT	20.37	PLA	13.86	NUC	13.11	32
F1MHF3	TR|F1MHF3|F1MHF3_BOVIN	NUC	NUC	40.43	CYT	11.06	PLA	9.207	36.37
F1MHG5	TR|F1MHG5|F1MHG5_BOVIN	NUC	NUC	16.57	CYT	13.91	PLA	11.88	29.66
F1MHH5	TR|F1MHH5|F1MHH5_BOVIN	PLA	PLA	52.87	NUC	7.783	CYT	6.736	33.31
F1MHP5	TR|F1MHP5|F1MHP5_BOVIN	PLA	PLA	47.94	EXC	9.361	NUC	7.873	35.2
F1MHR4	TR|F1MHR4|F1MHR4_BOVIN	PLA	PLA	25.12	CYT	24.84	NUC	11.01	49.82
F1MHR5	TR|F1MHR5|F1MHR5_BOVIN	NUC	NUC	18.24	CYT	11.31	PLA	9.397	27.51
F1MHR7	TR|F1MHR7|F1MHR7_BOVIN	NUC	NUC	16.34	CYT	12.04	MIT	10.3	27.15
F1MHW2	TR|F1MHW2|F1MHW2_BOVIN	NUC	NUC	23.93	CYT	12.04	PLA	10.75	31.7
F1MHX7	TR|F1MHX7|F1MHX7_BOVIN	NUC	NUC	16	CYT	13.37	PLA	13.22	28.59
F1MHY7	TR|F1MHY7|F1MHY7_BOVIN	NUC	NUC	15.86	PLA	13.39	CYT	12.75	28.52
F1MHZ3	TR|F1MHZ3|F1MHZ3_BOVIN	NUC	NUC	31.31	CYT	10.69	PLA	9.114	33.34
F1MI25	TR|F1MI25|F1MI25_BOVIN	NUC	NUC	32.17	CYT	22.74	PLA	7.86	49.72
F1MI29	TR|F1MI29|F1MI29_BOVIN	NUC/CYT	NUC	34.57	CYT	34.19	PLA	5.662	68.5
F1MI34	TR|F1MI34|F1MI34_BOVIN	NUC	NUC	15.75	CYT	12.26	PLA	11.43	27.03
F1MI35	TR|F1MI35|F1MI35_BOVIN	EXC	EXC	16.33	PLA	12.81	CYT	11.54	28.11
F1MI58	TR|F1MI58|F1MI58_BOVIN	CYT	CYT	42.64	PLA	16.85	NUC	7.372	44.15
F1MIA2	TR|F1MIA2|F1MIA2_BOVIN	CYT	CYT	27.38	PLA	25.51	NUC	11.29	51.9
F1MIA4	TR|F1MIA4|F1MIA4_BOVIN	PLA	PLA	17.07	NUC	15.77	CYT	15.13	32.42
F1MIB3	TR|F1MIB3|F1MIB3_BOVIN	NUC	NUC	18.02	CYT	12.98	PLA	10.61	29.44
F1MII0	TR|F1MII0|F1MII0_BOVIN	NUC	NUC	44.21	CYT	13.11	PLA	9.199	39.5
F1MIL9	TR|F1MIL9|F1MIL9_BOVIN	CYT	CYT	45.89	NUC	7.745	EXC	6.147	33.18
F1MIM3	TR|F1MIM3|F1MIM3_BOVIN	MIT	MIT	35.52	CYT	9.459	NUC	8.939	33.26
F1MIM9	TR|F1MIM9|F1MIM9_BOVIN	NUC	NUC	22.08	CYT	20.03	PLA	11.85	41.25
F1MIP0	TR|F1MIP0|F1MIP0_BOVIN	CYT	CYT	13.22	END	12.49	NUC	12.28	25.52
F1MIP7	TR|F1MIP7|F1MIP7_BOVIN	PLA	PLA	43.08	NUC	9.269	CYT	7.691	34.65
F1MIU3	TR|F1MIU3|F1MIU3_BOVIN	NUC	NUC	11.62	PLA	10.91	EXC	9.749	22.37
F1MIV1	TR|F1MIV1|F1MIV1_BOVIN	NUC	NUC	45.91	CYT	8.861	EXC	6.368	34.48
F1MIX6	TR|F1MIX6|F1MIX6_BOVIN	CYT	CYT	19.45	CSK	16.1	NUC	12.66	34.36
F1MJ00	TR|F1MJ00|F1MJ00_BOVIN	NUC	NUC	13.26	CYT	12.24	PLA	11.17	25.24
F1MJ07	TR|F1MJ07|F1MJ07_BOVIN	NUC	NUC	13.93	CYT	12.7	EXC	11.32	26.31
F1MJ26	TR|F1MJ26|F1MJ26_BOVIN	NUC	NUC	13.96	PLA	13.06	CYT	12.66	26.78
F1MJ74	TR|F1MJ74|F1MJ74_BOVIN	NUC	NUC	49.5	CYT	23.83	END	3.638	54.5
F1MJ95	TR|F1MJ95|F1MJ95_BOVIN	NUC	NUC	16.04	CYT	13.04	PLA	11.01	28.2
F1MJ96	TR|F1MJ96|F1MJ96_BOVIN	CYT	CYT	17.94	NUC	14.66	PLA	11.67	31.54
F1MJA0	TR|F1MJA0|F1MJA0_BOVIN	NUC	NUC	11.58	CYT	11.43	EXC	10.33	22.98
F1MJE0	TR|F1MJE0|F1MJE0_BOVIN	CYT	CYT	27.55	NUC	16.69	PLA	12.79	39.44
F1MJI3	TR|F1MJI3|F1MJI3_BOVIN	CYT	CYT	15.73	NUC	14.04	PLA	11.4	29.27
F1MJI8	TR|F1MJI8|F1MJI8_BOVIN	NUC	NUC	14.34	CYT	13.86	PLA	11.41	28.06
F1MJK2	TR|F1MJK2|F1MJK2_BOVIN	CSK	CSK	18.37	NUC	15.24	CYT	11.95	32.57
F1MJP6	TR|F1MJP6|F1MJP6_BOVIN	PLA	PLA	12.11	CYT	11.56	NUC	10.66	23.55
F1MJQ6	TR|F1MJQ6|F1MJQ6_BOVIN	EXC	EXC	31.53	PLA	14.39	NUC	12.35	38.05
F1MJV3	TR|F1MJV3|F1MJV3_BOVIN	CYT/NUC	CYT	33.64	NUC	33.36	PLA	4.99	66.82
F1MJZ7	TR|F1MJZ7|F1MJZ7_BOVIN	CYT	CYT	35.43	NUC	14.04	PLA	10.88	38.89
F1MK16	TR|F1MK16|F1MK16_BOVIN	PLA	PLA	46.8	CYT	7.266	EXC	6.161	32.69
F1MK25	TR|F1MK25|F1MK25_BOVIN	NUC	NUC	19.54	CYT	18.22	PLA	13.43	37.26
F1MK80	TR|F1MK80|F1MK80_BOVIN	PLA	PLA	44.1	NUC	8.628	CYT	8.402	34.03
F1MK94	TR|F1MK94|F1MK94_BOVIN	NUC	NUC	16.96	CYT	12.6	PLA	11.85	28.28
F1MKB5	TR|F1MKB5|F1MKB5_BOVIN	NUC	NUC	44.99	CYT	8.352	PLA	8.332	33.8
F1MKB9	TR|F1MKB9|F1MKB9_BOVIN	NUC	NUC	14.43	PLA	12.35	CYT	12.3	26.22
F1MKE9	TR|F1MKE9|F1MKE9_BOVIN	CSK/CYT	CSK	32.47	CYT	31.52	PLA	7.734	63.38
F1MKH0	TR|F1MKH0|F1MKH0_BOVIN	NUC	NUC	40.44	CYT	10.19	PLA	9.755	35.31
F1MKH9	TR|F1MKH9|F1MKH9_BOVIN	CYT	CYT	16.75	NUC	16.31	PLA	9.605	32.91
F1MKJ5	TR|F1MKJ5|F1MKJ5_BOVIN	CYT	CYT	12.73	NUC	11.41	PLA	10.03	23.82
F1MKR0	TR|F1MKR0|F1MKR0_BOVIN	NUC	NUC	14.43	CYT	12.53	PLA	11.41	26.45
F1MKT7	TR|F1MKT7|F1MKT7_BOVIN	NUC	NUC	13.67	PLA	11.99	CYT	11.82	25.23
F1MKU3	TR|F1MKU3|F1MKU3_BOVIN	CYT	CYT	23.88	PLA	23.86	NUC	10.54	47.73
F1MKV7	TR|F1MKV7|F1MKV7_BOVIN	LYS	LYS	16.54	PLA	11.94	EXC	11.43	27.17
F1MKW8	TR|F1MKW8|F1MKW8_BOVIN	CYT	CYT	35.62	NUC	16.78	PLA	8.987	42.53
F1MKY8	TR|F1MKY8|F1MKY8_BOVIN	NUC	NUC	47.07	CYT	7.86	PLA	6.475	33.39
F1MKZ6	TR|F1MKZ6|F1MKZ6_BOVIN	PLA	PLA	23.26	EXC	12.53	CYT	10.93	31.96
F1ML06	TR|F1ML06|F1ML06_BOVIN	NUC	NUC	17.85	CYT	14.73	PLA	13.48	31.57
F1ML17	TR|F1ML17|F1ML17_BOVIN	NUC	NUC	18.05	PLA	14.98	CYT	13.26	32.02
F1ML31	TR|F1ML31|F1ML31_BOVIN	PLA	PLA	21.06	CYT	11.98	EXC	11.03	30.05
F1ML55	TR|F1ML55|F1ML55_BOVIN	NUC	NUC	19.49	CYT	16.58	EXC	9.774	35.02
F1ML89	TR|F1ML89|F1ML89_BOVIN	MIT	MIT	50.79	CYT	14.3	NUC	5.424	41.34
F1MLA3	TR|F1MLA3|F1MLA3_BOVIN	NUC	NUC	13.09	CYT	12.21	PLA	11.93	25.08
F1MLB1	TR|F1MLB1|F1MLB1_BOVIN	NUC	NUC	19.86	CYT	14.3	PLA	12.62	32.26
F1MLB2	TR|F1MLB2|F1MLB2_BOVIN	NUC	NUC	48.58	CYT	13.11	PLA	6.726	39.8
F1MLE1	TR|F1MLE1|F1MLE1_BOVIN	NUC	NUC	15.07	PLA	12.56	CYT	12.34	26.94
F1MLJ0	TR|F1MLJ0|F1MLJ0_BOVIN	NUC	NUC	36.45	CYT	11.21	PLA	9.937	35.64
F1MLJ1	TR|F1MLJ1|F1MLJ1_BOVIN	PLA	PLA	19.58	CYT	11.26	NUC	10.79	28.28
F1MLJ7	TR|F1MLJ7|F1MLJ7_BOVIN	EXC	EXC	45.29	PLA	8.493	NUC	7.485	33.99
F1MLL3	TR|F1MLL3|F1MLL3_BOVIN	PLA	PLA	21.7	CYT	10.12	MIT	9.657	28.14
F1MLM8	TR|F1MLM8|F1MLM8_BOVIN	NUC	NUC	15.43	CYT	14.07	PLA	11.23	29.09
F1MLQ5	TR|F1MLQ5|F1MLQ5_BOVIN	NUC	NUC	12.48	CYT	11.61	MIT	10.88	23.88
F1MLR9	TR|F1MLR9|F1MLR9_BOVIN	CYT	CYT	17.48	CSK	12.96	PLA	11.23	29.07
F1MLS3	TR|F1MLS3|F1MLS3_BOVIN	CYT	CYT	44.18	NUC	9.699	PLA	6.574	35.3
F1MLS5	TR|F1MLS5|F1MLS5_BOVIN	CYT	CYT	19.15	NUC	17.6	PLA	10.69	36.18
F1MLT2	TR|F1MLT2|F1MLT2_BOVIN	NUC	NUC	24.9	CYT	14.21	PLA	8.928	34.92
F1MLT6	TR|F1MLT6|F1MLT6_BOVIN	NUC	NUC	13.2	PLA	12.42	CYT	11.98	25.42
F1MLY5	TR|F1MLY5|F1MLY5_BOVIN	NUC	NUC	23.49	CYT	15.08	PLA	14.14	35.32
F1MLY7	TR|F1MLY7|F1MLY7_BOVIN	NUC	NUC	30.75	CYT	10.4	PLA	9.065	32.77
F1MM00	TR|F1MM00|F1MM00_BOVIN	END	END	49.07	CYT	8.83	NUC	8.061	34.6
F1MM03	TR|F1MM03|F1MM03_BOVIN	PLA	PLA	52	CYT	7.191	NUC	6.776	32.67
F1MM29	TR|F1MM29|F1MM29_BOVIN	NUC	NUC	35.26	PLA	12.17	CYT	9.707	36.48
F1MM66	TR|F1MM66|F1MM66_BOVIN	JNC/PLA	JNC	35.42	PLA	34.93	CYT	5.296	70
F1MM72	TR|F1MM72|F1MM72_BOVIN	NUC	NUC	24.37	CYT	24.31	CSK	8.467	48.66
F1MM77	TR|F1MM77|F1MM77_BOVIN	NUC	NUC	16.51	PLA	14.19	CYT	12.92	29.98
F1MM81	TR|F1MM81|F1MM81_BOVIN	NUC	NUC	17.99	CYT	14.2	PLA	13.48	30.97
F1MMB4	TR|F1MMB4|F1MMB4_BOVIN	NUC	NUC	16.78	CYT	16.63	CSK	13.45	33.36
F1MMC7	TR|F1MMC7|F1MMC7_BOVIN	CSK	CSK	18.43	CYT	17.88	PLA	11.58	36.11
F1MME1	TR|F1MME1|F1MME1_BOVIN	PLA/JNC	PLA	45.69	JNC	28.52	CYT	3.806	61.47
F1MMI6	TR|F1MMI6|F1MMI6_BOVIN	PLA	PLA	14.41	CYT	13.32	NUC	12.28	27.43
F1MMJ1	TR|F1MMJ1|F1MMJ1_BOVIN	NUC	NUC	42.75	CYT	9.604	PLA	8.187	35
F1MMK8	TR|F1MMK8|F1MMK8_BOVIN	CYT	CYT	50.82	NUC	8.149	MIT	5.763	33.81
F1MMN0	TR|F1MMN0|F1MMN0_BOVIN	CYT	CYT	17.7	NUC	16.88	PLA	10.83	34.29
F1MMN6	TR|F1MMN6|F1MMN6_BOVIN	PLA	PLA	49.04	NUC	7.624	CYT	6.617	33.2
F1MMQ3	TR|F1MMQ3|F1MMQ3_BOVIN	NUC	NUC	15.96	CYT	13.16	PLA	10.84	28.3
F1MMQ8	TR|F1MMQ8|F1MMQ8_BOVIN	CYT	CYT	27.23	CSK	26.4	NUC	8.716	53.18
F1MMS1	TR|F1MMS1|F1MMS1_BOVIN	NUC	NUC	43.21	CYT	12.07	PLA	8.485	38.07
F1MMT3	TR|F1MMT3|F1MMT3_BOVIN	CYT	CYT	16.74	NUC	15.03	PLA	13.21	31.23
F1MMW5	TR|F1MMW5|F1MMW5_BOVIN	PLA	PLA	18.54	NUC	13.58	CYT	12.43	30.53
F1MMX5	TR|F1MMX5|F1MMX5_BOVIN	PLA	PLA	46.72	CYT	11.44	NUC	7.139	37.64
F1MMY4	TR|F1MMY4|F1MMY4_BOVIN	CYT	CYT	35.41	NUC	13.02	PLA	7.497	37.58
F1MN00	TR|F1MN00|F1MN00_BOVIN	MIT	MIT	47.1	NUC	8.826	CYT	6.689	34.52
F1MN32	TR|F1MN32|F1MN32_BOVIN	NUC	NUC	30.63	CYT	28.38	PLA	6.784	57.69
F1MN54	TR|F1MN54|F1MN54_BOVIN	PLA	PLA	23.71	CYT	17.39	NUC	11.29	38.5
F1MN61	TR|F1MN61|F1MN61_BOVIN	CYT	CYT	34.35	NUC	14.94	CSK	9.446	39.73
F1MN68	TR|F1MN68|F1MN68_BOVIN	NUC	NUC	23.87	CYT	11.16	EXC	10.37	30.57
F1MN96	TR|F1MN96|F1MN96_BOVIN	GOL	GOL	42.81	CYT	21.67	NUC	7.093	50.84
F1MNA6	TR|F1MNA6|F1MNA6_BOVIN	NUC	NUC	16.78	CYT	14.65	PLA	10.53	30.75
F1MNB7	TR|F1MNB7|F1MNB7_BOVIN	NUC	NUC	15.33	CYT	13.44	EXC	9.477	28.23
F1MNB8	TR|F1MNB8|F1MNB8_BOVIN	NUC	NUC	12.19	CYT	11.94	EXC	11.81	24.07
F1MND5	TR|F1MND5|F1MND5_BOVIN	NUC	NUC	42.96	CYT	9.326	PLA	8.249	34.7
F1MNE1	TR|F1MNE1|F1MNE1_BOVIN	NUC	NUC	45.72	CYT	13.71	PLA	7.712	40.4
F1MNE2	TR|F1MNE2|F1MNE2_BOVIN	NUC	NUC	12.9	CYT	10.37	MIT	10.16	22.67
F1MNE5	TR|F1MNE5|F1MNE5_BOVIN	NUC	NUC	18.9	CYT	15.56	CSK	9.686	33.31
F1MNG8	TR|F1MNG8|F1MNG8_BOVIN	PLA	PLA	26.55	JNC	22.85	NUC	10.8	47.57
F1MNH3	TR|F1MNH3|F1MNH3_BOVIN	PLA	PLA	13.54	NUC	12.45	EXC	12.44	25.7
F1MNJ1	TR|F1MNJ1|F1MNJ1_BOVIN	PLA	PLA	35.74	NUC	10.74	CYT	9.439	34.86
F1MNL4	TR|F1MNL4|F1MNL4_BOVIN	PLA	PLA	61.66	NUC	6.085	CYT	5.513	30.1
F1MNL9	TR|F1MNL9|F1MNL9_BOVIN	EXC	EXC	20.8	PLA	13.13	NUC	11.53	31.32
F1MNR5	TR|F1MNR5|F1MNR5_BOVIN	NUC	NUC	40.03	CYT	15.51	PLA	8.902	41.92
F1MNS5	TR|F1MNS5|F1MNS5_BOVIN	PLA	PLA	33.86	NUC	9.808	EXC	9.677	33.16
F1MNT1	TR|F1MNT1|F1MNT1_BOVIN	NUC	NUC	42.38	CYT	9.056	PLA	7.332	34.3
F1MNU0	TR|F1MNU0|F1MNU0_BOVIN	NUC	NUC	14.15	CYT	12.37	PLA	10.41	26.05
F1MNU6	TR|F1MNU6|F1MNU6_BOVIN	NUC	NUC	15.46	CYT	15.04	PLA	12.46	30.37
F1MNU7	TR|F1MNU7|F1MNU7_BOVIN	NUC	NUC	17.53	CYT	15	PLA	11.02	31.71
F1MNY2	TR|F1MNY2|F1MNY2_BOVIN	CYT	CYT	12.49	NUC	11.26	PLA	10.27	23.46
F1MP13	TR|F1MP13|F1MP13_BOVIN	CYT	CYT	41.45	NUC	27.59	CSK	4.165	59.47
F1MP20	TR|F1MP20|F1MP20_BOVIN	CYT	CYT	14.66	NUC	14.19	PLA	9.41	28.72
F1MP29	TR|F1MP29|F1MP29_BOVIN	PLA	PLA	28.17	CYT	21	GOL	7.785	45.65
F1MP31	TR|F1MP31|F1MP31_BOVIN	NUC	NUC	21.97	CYT	18.11	PLA	10.62	38.54
F1MP35	TR|F1MP35|F1MP35_BOVIN	NUC	NUC	21.65	CYT	16.44	PLA	10.57	36.1
F1MP46	TR|F1MP46|F1MP46_BOVIN	PLA/JNC	PLA	36.56	JNC	35.97	NUC	5.654	72.11
F1MP58	TR|F1MP58|F1MP58_BOVIN	NUC	NUC	17.65	CYT	14.79	CSK	10.87	31.52
F1MP59	TR|F1MP59|F1MP59_BOVIN	NUC	NUC	18.72	CYT	17.24	EXC	9.479	35.43
F1MPB2	TR|F1MPB2|F1MPB2_BOVIN	CYT/NUC	CYT	36.11	NUC	33.03	PLA	4.972	67.02
F1MPC9	TR|F1MPC9|F1MPC9_BOVIN	PLA	PLA	61.54	NUC	5.27	CYT	5.207	29.22
F1MPD4	TR|F1MPD4|F1MPD4_BOVIN	PLA	PLA	17.81	NUC	14.2	CYT	12.13	30.85
F1MPE9	TR|F1MPE9|F1MPE9_BOVIN	PLA/NUC	PLA	38.03	NUC	35.96	EXC	6.923	72.46
F1MPF0	TR|F1MPF0|F1MPF0_BOVIN	PLA	PLA	24.9	NUC	9.951	CYT	9.757	29.64
F1MPF7	TR|F1MPF7|F1MPF7_BOVIN	NUC	NUC	42.39	CYT	13.21	PLA	7.476	39.38
F1MPK6	TR|F1MPK6|F1MPK6_BOVIN	EXC	EXC	44.9	PLA	8.73	NUC	8.355	34.23
F1MPL1	TR|F1MPL1|F1MPL1_BOVIN	MIT	MIT	36.38	CYT	26.08	NUC	6.754	56.03
F1MPR0	TR|F1MPR0|F1MPR0_BOVIN	PLA	PLA	17.06	NUC	14.17	CYT	12.3	30.32
F1MPT5	TR|F1MPT5|F1MPT5_BOVIN	CSK	CSK	33.53	NUC	11.65	CYT	10.77	35.3
F1MPU1	TR|F1MPU1|F1MPU1_BOVIN	NUC	NUC	17.69	CYT	13.97	PLA	11.17	30.48
F1MPU4	TR|F1MPU4|F1MPU4_BOVIN	CSK	CSK	28.74	PLA	28.39	NUC	7.783	56.92
F1MPV3	TR|F1MPV3|F1MPV3_BOVIN	PLA	PLA	35.89	CYT	22.31	NUC	12.48	50.3
F1MPV7	TR|F1MPV7|F1MPV7_BOVIN	PLA	PLA	51.87	CYT	6.846	NUC	6.332	32.28
F1MPW1	TR|F1MPW1|F1MPW1_BOVIN	NUC	NUC	14.28	CYT	13.16	PLA	13	27.12
F1MPX1	TR|F1MPX1|F1MPX1_BOVIN	CYT	CYT	14.04	NUC	12.4	PLA	9.74	26.01
F1MQ08	TR|F1MQ08|F1MQ08_BOVIN	NUC	NUC	28.2	CYT	15.97	CSK	7.613	38.76
F1MQ26	TR|F1MQ26|F1MQ26_BOVIN	NUC	NUC	18.1	CYT	16.74	PLA	11.42	34.37
F1MQ36	TR|F1MQ36|F1MQ36_BOVIN	CYT	CYT	30.91	NUC	28.65	PLA	5.994	58.21
F1MQ42	TR|F1MQ42|F1MQ42_BOVIN	NUC	NUC	31.67	CYT	28.94	PLA	9.532	58.96
F1MQ44	TR|F1MQ44|F1MQ44_BOVIN	CYT	CYT	16.58	NUC	14.03	PLA	10.08	29.83
F1MQ59	TR|F1MQ59|F1MQ59_BOVIN	NUC	NUC	28.31	CYT	13.06	PLA	9.898	35.06
F1MQ65	TR|F1MQ65|F1MQ65_BOVIN	CSK	CSK	19.79	CYT	16.24	PLA	11.4	34.75
F1MQ73	TR|F1MQ73|F1MQ73_BOVIN	PLA	PLA	44.34	NUC	7.935	CYT	7.775	33.24
F1MQ85	TR|F1MQ85|F1MQ85_BOVIN	NUC	NUC	55.02	CYT	9.006	PLA	5.863	34.57
F1MQ88	TR|F1MQ88|F1MQ88_BOVIN	NUC	NUC	18.83	CYT	14.79	PLA	13.33	32.26
F1MQA1	TR|F1MQA1|F1MQA1_BOVIN	PLA	PLA	13.78	NUC	13.19	EXC	11.83	26.82
F1MQA2	TR|F1MQA2|F1MQA2_BOVIN	EXC	EXC	23.4	PLA	17.7	CYT	14.74	38.75
F1MQA4	TR|F1MQA4|F1MQA4_BOVIN	NUC	NUC	14.95	CYT	12.98	PLA	12.24	27.38
F1MQA8	TR|F1MQA8|F1MQA8_BOVIN	CYT	CYT	30.93	PLA	28.5	NUC	9.72	57.99
F1MQD1	TR|F1MQD1|F1MQD1_BOVIN	CYT	CYT	18.36	NUC	12.05	PLA	10.92	28.49
F1MQH9	TR|F1MQH9|F1MQH9_BOVIN	NUC	NUC	22.07	CYT	18.48	PLA	16.78	39.09
F1MQM5	TR|F1MQM5|F1MQM5_BOVIN	CYT	CYT	16.1	NUC	15.27	PLA	11.52	31.12
F1MQP6	TR|F1MQP6|F1MQP6_BOVIN	PLA	PLA	16.35	NUC	12.29	CYT	11.03	27.47
F1MQQ1	TR|F1MQQ1|F1MQQ1_BOVIN	NUC	NUC	17.02	CYT	15.15	PLA	13.39	31.57
F1MQQ8	TR|F1MQQ8|F1MQQ8_BOVIN	NUC	NUC	18.79	CYT	14.6	PLA	10.44	31.99
F1MQV1	TR|F1MQV1|F1MQV1_BOVIN	NUC	NUC	36.31	CYT	13.01	PLA	8.527	37.83
F1MQW7	SP|F1MQW7|CK097_BOVIN	NUC	NUC	16.92	PLA	15.66	CYT	12.37	32.17
F1MQY7	TR|F1MQY7|F1MQY7_BOVIN	NUC	NUC	44.71	CYT	23.04	CSK	4.037	53.07
F1MR80	TR|F1MR80|F1MR80_BOVIN	PLA	PLA	17.86	CYT	10.82	NUC	10.65	26.66
F1MRH1	TR|F1MRH1|F1MRH1_BOVIN	PLA	PLA	22.08	CYT	11.6	NUC	11.49	30.15
F1MRH8	TR|F1MRH8|F1MRH8_BOVIN	CYT	CYT	28.66	PLA	27.95	NUC	11.68	56.2
F1MRJ5	TR|F1MRJ5|F1MRJ5_BOVIN	NUC	NUC	17.33	CYT	14.27	PLA	11.55	30.63
F1MRL0	TR|F1MRL0|F1MRL0_BOVIN	CYT	CYT	40.93	NUC	13.65	PLA	8.067	39.7
F1MRM9	TR|F1MRM9|F1MRM9_BOVIN	NUC	NUC	31.62	CSK	28.85	CYT	8.254	58.79
F1MRN5	TR|F1MRN5|F1MRN5_BOVIN	PLA	PLA	12.09	NUC	10.77	CYT	10.71	22.56
F1MRT7	TR|F1MRT7|F1MRT7_BOVIN	NUC	NUC	16.66	CYT	13.08	PLA	10.33	28.68
F1MRU1	TR|F1MRU1|F1MRU1_BOVIN	EXC	EXC	19.7	PLA	18.21	CYT	14.36	37.35
F1MRU6	TR|F1MRU6|F1MRU6_BOVIN	NUC	NUC	30.39	END	27.38	CYT	7.862	56.04
F1MRY3	TR|F1MRY3|F1MRY3_BOVIN	NUC	NUC	15.35	CYT	14.04	PLA	13.35	29
F1MRY8	TR|F1MRY8|F1MRY8_BOVIN	PLA	PLA	47.27	NUC	9.221	EXC	9.11	35
F1MS00	TR|F1MS00|F1MS00_BOVIN	PLA	PLA	42.19	CYT	9.226	NUC	8.218	34.47
F1MS14	TR|F1MS14|F1MS14_BOVIN	NUC	NUC	17.1	CYT	14.41	PLA	12.79	30.66
F1MS34	TR|F1MS34|F1MS34_BOVIN	NUC	NUC	17.65	CYT	12.84	PLA	12.56	29.03
F1MS52	TR|F1MS52|F1MS52_BOVIN	CYT	CYT	43.25	NUC	9.363	PLA	6.586	34.78
F1MS75	TR|F1MS75|F1MS75_BOVIN	PLA	PLA	64.49	NUC	4.948	CYT	4.575	28.09
F1MS90	TR|F1MS90|F1MS90_BOVIN	NUC	NUC	48.66	CYT	12.5	PLA	9.169	39.04
F1MS95	TR|F1MS95|F1MS95_BOVIN	NUC	NUC	15.26	CYT	12.85	PLA	10.69	27.43
F1MSC0	TR|F1MSC0|F1MSC0_BOVIN	CYT	CYT	38.19	PLA	10.37	NUC	10.1	35.05
F1MSC9	TR|F1MSC9|F1MSC9_BOVIN	NUC	NUC	12.15	PLA	11.85	CYT	11.59	23.93
F1MSD5	TR|F1MSD5|F1MSD5_BOVIN	NUC	NUC	16.3	CYT	13.67	EXC	10.84	29.18
F1MSF0	TR|F1MSF0|F1MSF0_BOVIN	CYT	CYT	14.84	PLA	14.41	NUC	13.78	29.13
F1MSG8	TR|F1MSG8|F1MSG8_BOVIN	GOL	GOL	44	NUC	8.83	CYT	7.792	34.25
F1MSI2	TR|F1MSI2|F1MSI2_BOVIN	EXC	EXC	23.29	PLA	12.54	NUC	11.7	31.98
F1MSJ5	TR|F1MSJ5|F1MSJ5_BOVIN	CYT	CYT	43.88	NUC	9.811	PLA	7.609	35.4
F1MSK1	TR|F1MSK1|F1MSK1_BOVIN	NUC	NUC	20.33	CYT	15.55	PLA	14.53	34.17
F1MSL8	TR|F1MSL8|F1MSL8_BOVIN	NUC	NUC	15.44	CYT	12.93	EXC	9.843	27.66
F1MSM8	TR|F1MSM8|F1MSM8_BOVIN	NUC	NUC	15.07	CYT	13.94	PLA	10.8	28.68
F1MSP8	TR|F1MSP8|F1MSP8_BOVIN	CSK	CSK	13.98	NUC	13.41	CYT	11.77	27.23
F1MSQ7	TR|F1MSQ7|F1MSQ7_BOVIN	PLA	PLA	13.62	CYT	12.92	MIT	12.23	26.36
F1MSU8	TR|F1MSU8|F1MSU8_BOVIN	NUC	NUC	18.52	CYT	14.7	PLA	13.4	31.95
F1MSV7	TR|F1MSV7|F1MSV7_BOVIN	NUC	NUC	18.16	CYT	14.12	PLA	12.4	30.97
F1MSZ5	TR|F1MSZ5|F1MSZ5_BOVIN	PLA	PLA	31.02	EXC	20.97	CYT	6.854	46.76
F1MT13	TR|F1MT13|F1MT13_BOVIN	EXC	EXC	20.2	NUC	14.82	CYT	12.9	33.14
F1MT15	TR|F1MT15|F1MT15_BOVIN	NUC	NUC	15.82	CYT	15.76	CSK	12.14	31.57
F1MT37	TR|F1MT37|F1MT37_BOVIN	NUC	NUC	13.16	CYT	12.83	PLA	11.54	25.9
F1MT44	TR|F1MT44|F1MT44_BOVIN	EXC	EXC	43.69	CYT	7.94	PLA	7.781	33.17
F1MTC3	TR|F1MTC3|F1MTC3_BOVIN	NUC	NUC	42.41	CYT	9.732	PLA	8.49	35.1
F1MTG6	TR|F1MTG6|F1MTG6_BOVIN	NUC	NUC	16.95	CYT	13.74	PLA	10.99	29.7
F1MTM9	TR|F1MTM9|F1MTM9_BOVIN	NUC	NUC	16.09	CYT	15.11	PLA	13.75	30.89
F1MTQ5	TR|F1MTQ5|F1MTQ5_BOVIN	POX	POX	21.53	NUC	13.4	PLA	12.4	32.09
F1MTR3	TR|F1MTR3|F1MTR3_BOVIN	NUC	NUC	47.84	CYT	8.026	PLA	6.586	33.62
F1MTS9	TR|F1MTS9|F1MTS9_BOVIN	NUC	NUC	14.54	CYT	14.07	PLA	11.97	28.47
F1MTT5	TR|F1MTT5|F1MTT5_BOVIN	PLA	PLA	14.01	CYT	12.18	EXC	11.55	25.71
F1MTW9	TR|F1MTW9|F1MTW9_BOVIN	NUC	NUC	24.67	CYT	24.54	PLA	8.149	49.15
F1MTX3	TR|F1MTX3|F1MTX3_BOVIN	NUC	NUC	25.27	CYT	14.87	PLA	12.36	35.97
F1MU26	TR|F1MU26|F1MU26_BOVIN	CYT	CYT	38.23	NUC	9.302	PLA	9.26	33.78
F1MU45	TR|F1MU45|F1MU45_BOVIN	NUC	NUC	42.21	CYT	9.019	EXC	7.12	34.23
F1MU48	TR|F1MU48|F1MU48_BOVIN	NUC	NUC	52.21	CYT	25.99	PLA	3.178	57.7
F1MU82	TR|F1MU82|F1MU82_BOVIN	NUC	NUC	23.5	CYT	23.05	CSK	10.73	46.34
F1MUB8	TR|F1MUB8|F1MUB8_BOVIN	CYT	CYT	20.57	CSK	15.98	NUC	14.85	34.87
F1MUD4	TR|F1MUD4|F1MUD4_BOVIN	END	END	40.54	NUC	11.48	CYT	9.678	36.91
F1MUE0	TR|F1MUE0|F1MUE0_BOVIN	PLA	PLA	47.6	NUC	7.32	CYT	7.119	32.8
F1MUF1	TR|F1MUF1|F1MUF1_BOVIN	CYT/NUC	CYT	32.07	NUC	31.9	PLA	5.107	63.86
F1MUH9	TR|F1MUH9|F1MUH9_BOVIN	NUC	NUC	19.68	CYT	15.55	PLA	14.2	33.77
F1MUK0	TR|F1MUK0|F1MUK0_BOVIN	NUC	NUC	12.82	CYT	12.59	PLA	9.945	25.35
F1MUM9	TR|F1MUM9|F1MUM9_BOVIN	NUC/CYT	NUC	33.22	CYT	32.72	PLA	5.296	65.61
F1MUW4	TR|F1MUW4|F1MUW4_BOVIN	CYT	CYT	38.47	NUC	10.45	PLA	7.77	35.22
F1MUW6	TR|F1MUW6|F1MUW6_BOVIN	NUC	NUC	30.83	CYT	29.52	CSK	6.68	59.55
F1MUX1	TR|F1MUX1|F1MUX1_BOVIN	NUC	NUC	37.97	CYT	8.506	PLA	7.846	32.78
F1MUX8	TR|F1MUX8|F1MUX8_BOVIN	NUC	NUC	47.8	CYT	25.44	MIT	3.275	56.87
F1MUY8	TR|F1MUY8|F1MUY8_BOVIN	PLA	PLA	47.47	NUC	8.436	CYT	7.473	34.08
F1MV14	TR|F1MV14|F1MV14_BOVIN	CYT	CYT	17.3	NUC	15.9	PLA	14.55	32.74
F1MV32	TR|F1MV32|F1MV32_BOVIN	PLA	PLA	26.2	NUC	10.88	CYT	9.27	31.4
F1MV63	TR|F1MV63|F1MV63_BOVIN	NUC	NUC	27.28	CYT	25.22	PLA	6.75	51.42
F1MV64	TR|F1MV64|F1MV64_BOVIN	PLA	PLA	61.57	CYT	5.593	NUC	5.572	29.57
F1MV68	TR|F1MV68|F1MV68_BOVIN	NUC	NUC	15.63	PLA	13.58	CYT	13.14	28.61
F1MVC0	TR|F1MVC0|F1MVC0_BOVIN	CYT	CYT	53.4	MIT	7.802	NUC	6.995	33.3
F1MVC5	TR|F1MVC5|F1MVC5_BOVIN	PLA	PLA	16.7	NUC	15.81	CYT	13.35	32.22
F1MVD0	TR|F1MVD0|F1MVD0_BOVIN	NUC	NUC	30.99	CYT	26.26	PLA	6.927	54.54
F1MVE4	TR|F1MVE4|F1MVE4_BOVIN	CYT	CYT	18.49	PLA	16.53	NUC	13.89	34.33
F1MVJ1	TR|F1MVJ1|F1MVJ1_BOVIN	NUC	NUC	22.71	CYT	13.9	PLA	9.535	33.39
F1MVL1	TR|F1MVL1|F1MVL1_BOVIN	EXC	EXC	30.44	PLA	10.64	CYT	9.641	32.95
F1MVN8	TR|F1MVN8|F1MVN8_BOVIN	NUC	NUC	13.66	CYT	13.28	MIT	9.953	26.84
F1MVP6	TR|F1MVP6|F1MVP6_BOVIN	NUC	NUC	16.12	CYT	13.4	PLA	12.81	28.71
F1MVR8	TR|F1MVR8|F1MVR8_BOVIN	NUC	NUC	14.43	CYT	13.79	PLA	11.82	28.04
F1MVV2	TR|F1MVV2|F1MVV2_BOVIN	CYT	CYT	47.04	NUC	9.84	EXC	6.062	35.72
F1MVY4	TR|F1MVY4|F1MVY4_BOVIN	NUC	NUC	50.36	CYT	26.84	MIT	2.796	59.05
F1MVZ2	TR|F1MVZ2|F1MVZ2_BOVIN	NUC	NUC	26.04	CYT	24.61	JNC	9.888	49.92
F1MW24	TR|F1MW24|F1MW24_BOVIN	PLA	PLA	29.09	NUC	12.7	CYT	12.24	34.93
F1MW32	TR|F1MW32|F1MW32_BOVIN	PLA	PLA	42.68	NUC	24.6	CYT	5.927	55.12
F1MW90	TR|F1MW90|F1MW90_BOVIN	NUC	NUC	17.46	CYT	16.62	PLA	12.18	33.79
F1MWB8	TR|F1MWB8|F1MWB8_BOVIN	CYT	CYT	40.71	NUC	9.484	PLA	6.702	34.52
F1MWC0	TR|F1MWC0|F1MWC0_BOVIN	NUC	NUC	14.39	PLA	14.34	CYT	12.41	28.72
F1MWE5	TR|F1MWE5|F1MWE5_BOVIN	NUC	NUC	16.73	PLA	13.33	CYT	13.15	29.04
F1MWF5	TR|F1MWF5|F1MWF5_BOVIN	CYT/PLA	CYT	35.52	PLA	34.15	NUC	6.531	68.71
F1MWF9	TR|F1MWF9|F1MWF9_BOVIN	CYT	CYT	34.51	NUC	9.953	PLA	8.795	33.54
F1MWG7	TR|F1MWG7|F1MWG7_BOVIN	NUC/CYT	NUC	32.69	CYT	31.37	PLA	5.78	63.21
F1MWH8	TR|F1MWH8|F1MWH8_BOVIN	CSK	CSK	39.91	NUC	14.41	CYT	10.94	40.47
F1MWI1	TR|F1MWI1|F1MWI1_BOVIN	CYT	CYT	26.06	EXC	21.04	NUC	10.11	44.73
F1MWI2	TR|F1MWI2|F1MWI2_BOVIN	NUC	NUC	23.84	CYT	13.64	PLA	10.58	33.65
F1MWK1	TR|F1MWK1|F1MWK1_BOVIN	PLA	PLA	43.37	NUC	8.816	CYT	8.436	34.15
F1MWK5	TR|F1MWK5|F1MWK5_BOVIN	NUC	NUC	18.98	CYT	15.59	PLA	12.98	33.41
F1MWK8	TR|F1MWK8|F1MWK8_BOVIN	PLA	PLA	32.99	JNC	26.62	NUC	7.251	55.82
F1MWK9	TR|F1MWK9|F1MWK9_BOVIN	END	END	33.35	NUC	12.5	CYT	11.29	36.29
F1MWM8	TR|F1MWM8|F1MWM8_BOVIN	PLA	PLA	44.07	NUC	7.069	EXC	6.651	32.22
F1MWN4	TR|F1MWN4|F1MWN4_BOVIN	CSK	CSK	15.49	NUC	13.89	CYT	12.27	28.91
F1MWN8	TR|F1MWN8|F1MWN8_BOVIN	CYT	CYT	17.38	NUC	16.3	CSK	11.99	33.32
F1MWQ6	TR|F1MWQ6|F1MWQ6_BOVIN	CYT	CYT	38.03	NUC	12.63	PLA	8.221	37.79
F1MWS0	TR|F1MWS0|F1MWS0_BOVIN	NUC	NUC	31.26	CYT	13.12	EXC	7.02	36.33
F1MWU6	TR|F1MWU6|F1MWU6_BOVIN	PLA	PLA	16.95	NUC	16.15	CYT	13.07	32.84
F1MWY0	TR|F1MWY0|F1MWY0_BOVIN	NUC	NUC	13.92	CYT	12.89	PLA	11.77	26.53
F1MWZ4	TR|F1MWZ4|F1MWZ4_BOVIN	NUC	NUC	41.42	CYT	10.5	PLA	8.047	35.87
F1MX00	TR|F1MX00|F1MX00_BOVIN	NUC	NUC	16.45	CYT	14.72	PLA	11.4	30.63
F1MX12	TR|F1MX12|F1MX12_BOVIN	NUC	NUC	22.27	CYT	16.14	PLA	10.88	36.06
F1MX23	TR|F1MX23|F1MX23_BOVIN	CYT	CYT	40.42	PLA	16.68	NUC	8.399	43.55
F1MX42	TR|F1MX42|F1MX42_BOVIN	MIT	MIT	30.7	CYT	19.2	NUC	12.04	44.16
F1MX60	TR|F1MX60|F1MX60_BOVIN	CYT/JNC	CYT	40.45	JNC	39.34	NUC	2.801	78.91
F1MX97	TR|F1MX97|F1MX97_BOVIN	PLA	PLA	15.54	CYT	13.72	NUC	13.45	28.72
F1MXD0	TR|F1MXD0|F1MXD0_BOVIN	NUC	NUC	16.12	CYT	15.31	PLA	12.55	31.18
F1MXG8	TR|F1MXG8|F1MXG8_BOVIN	CSK	CSK	28.69	NUC	26.21	CYT	11.9	53.54
F1MXH6	TR|F1MXH6|F1MXH6_BOVIN	NUC	NUC	16.33	CYT	15.39	PLA	12.71	31.42
F1MXJ6	TR|F1MXJ6|F1MXJ6_BOVIN	CYT/CSK	CYT	37.5	CSK	35.12	NUC	5.042	70.9
F1MXR8	TR|F1MXR8|F1MXR8_BOVIN	NUC	NUC	20.69	CYT	13.85	PLA	12.79	32.19
F1MXS0	TR|F1MXS0|F1MXS0_BOVIN	PLA	PLA	35.72	NUC	9.528	CYT	8.626	33.4
F1MY06	TR|F1MY06|F1MY06_BOVIN	CYT	CYT	37.91	NUC	13.91	PLA	8.374	39.38
F1MY41	TR|F1MY41|F1MY41_BOVIN	NUC/CYT	NUC	32.14	CYT	30.51	PLA	6.165	61.63
F1MY47	TR|F1MY47|F1MY47_BOVIN	NUC	NUC	16.49	CYT	15.23	PLA	13.95	31.31
F1MY55	TR|F1MY55|F1MY55_BOVIN	PLA	PLA	16.74	CYT	15.39	NUC	14.81	31.69
F1MY77	TR|F1MY77|F1MY77_BOVIN	NUC	NUC	18.67	CYT	14.48	PLA	11.69	31.76
F1MYA3	TR|F1MYA3|F1MYA3_BOVIN	PLA	PLA	18.58	CYT	16.19	END	13.15	33.93
F1MYE0	TR|F1MYE0|F1MYE0_BOVIN	NUC	NUC	17.81	CYT	16.79	PLA	14.21	34.25
F1MYE9	TR|F1MYE9|F1MYE9_BOVIN	NUC	NUC	28.81	CYT	28.4	PLA	7.759	56.97
F1MYG2	TR|F1MYG2|F1MYG2_BOVIN	NUC	NUC	51.37	CYT	9.426	PLA	6.986	35.3
F1MYG6	TR|F1MYG6|F1MYG6_BOVIN	NUC	NUC	23.35	CYT	18.13	PLA	11.87	39.31
F1MYG7	TR|F1MYG7|F1MYG7_BOVIN	PLA	PLA	15.38	CYT	12.11	NUC	12.06	26.6
F1MYI9	TR|F1MYI9|F1MYI9_BOVIN	CYT	CYT	15.94	NUC	15.48	PLA	15.25	31.28
F1MYL8	TR|F1MYL8|F1MYL8_BOVIN	NUC	NUC	43.8	CYT	8.58	PLA	7.66	33.93
F1MYQ7	TR|F1MYQ7|F1MYQ7_BOVIN	NUC	NUC	15.39	CYT	13.59	PLA	11.88	28.46
F1MYQ8	TR|F1MYQ8|F1MYQ8_BOVIN	NUC	NUC	27.29	CYT	17.3	PLA	9.639	40.13
F1MYT8	TR|F1MYT8|F1MYT8_BOVIN	NUC	NUC	15.41	CYT	12.45	CSK	9.905	27.03
F1MYW0	TR|F1MYW0|F1MYW0_BOVIN	NUC	NUC	14.96	CYT	11.4	PLA	9.626	25.42
F1MYX5	TR|F1MYX5|F1MYX5_BOVIN	CYT	CYT	46.64	NUC	7.999	PLA	6.878	33.53
F1MYY2	TR|F1MYY2|F1MYY2_BOVIN	PLA	PLA	31.02	NUC	12.16	CYT	11.03	35.03
F1MYZ1	TR|F1MYZ1|F1MYZ1_BOVIN	END	END	35.55	EXC	15.2	PLA	11.66	40.43
F1MZ03	TR|F1MZ03|F1MZ03_BOVIN	CYT	CYT	16.29	NUC	13.42	CSK	9.242	28.86
F1MZ25	TR|F1MZ25|F1MZ25_BOVIN	NUC	NUC	18.78	CYT	13.7	PLA	12.04	30.83
F1MZ28	TR|F1MZ28|F1MZ28_BOVIN	CYT	CYT	14.77	NUC	14.75	PLA	12.4	29.51
[truncated: 6,695 more rows]
