# Supplementary material for: Transcriptional Repression of MFG-E8 Causes Disturbance in the Homeostasis of Cell Cycle Through DOCK/ZP4/STAT Signaling in Buffalo Mammary Epithelial Cells
Source: Front Cell Dev Biol. 2021 Apr 1;9:568660. doi: 10.3389/fcell.2021.568660 (PMC8047144; doi:10.3389/fcell.2021.568660)
Supplement: Supplementary Table 6 — Information from string enrichment analysis for all the associated proteins involved in network construction. [file Table_6.XLSX]

## Sheet: Upregulated-CellularComponent
Pathway ID	Pathway description	observed gene count	false discovery rate	matching proteins in your network (IDs)	matching proteins in your network (labels)
GO.0005737	cytoplasm	477	6.11e-09	ENSP00000078429,ENSP00000080059,ENSP00000158166,ENSP00000167106,ENSP00000167588,ENSP00000180173,ENSP00000187762,ENSP00000200453,ENSP00000202625,ENSP00000206542,ENSP00000215530,ENSP00000215904,ENSP00000216027,ENSP00000216185,ENSP00000217133,ENSP00000217244,ENSP00000217372,ENSP00000217961,ENSP00000218032,ENSP00000219593,ENSP00000221665,ENSP00000221930,ENSP00000222145,ENSP00000222219,ENSP00000222330…	AASS,ABAT,ABCC10,ABI2,ABI3,ACADSB,ACTL7A,ACTR1A,ACTR5,ADAMTS13,ADCY4,ADPGK,AGAP3,AGPAT9,AHI1,AK7,AKT3,ALDH1A3,ALKBH4,ALOX15,AMPD1,AMPD3,ANAPC16,ANKAR,ANKRD33,ANO5,ARF3,ARFIP2,ARHGAP27,ARHGAP30,ARHGAP4,ARHGAP6,ARHGEF25,ARHGEF3,ARHGEF40,ARHGEF6,ARID3A,ARL14EP,ARSG,ASB10,ASIC3,ASMTL,ATP11A,ATP13A1,ATP2C2,ATP8A2,AURKB,BAIAP2L2,BBS9,BCS1L,BHLHA9,BHMT,BICD2,BMP4,BNC1,BSX,C16orf62,CACNA1A,CACNB3,CAMKK1,…
GO.0005622	intracellular	580	7.09e-09	ENSP00000040738,ENSP00000078429,ENSP00000158166,ENSP00000167106,ENSP00000167588,ENSP00000180173,ENSP00000187762,ENSP00000200453,ENSP00000202625,ENSP00000206542,ENSP00000215530,ENSP00000215742,ENSP00000215904,ENSP00000216027,ENSP00000216185,ENSP00000217133,ENSP00000217244,ENSP00000217372,ENSP00000218032,ENSP00000219593,ENSP00000221455,ENSP00000221665,ENSP00000221930,ENSP00000222145,ENSP00000222219…	AASS,ABAT,ABCC10,ABI2,ABI3,ACADSB,ACTR5,ADAMTS13,ADCY4,ADCY5,ADCYAP1,ADPGK,AGAP3,AGPAT9,AHI1,AK7,AKT3,ALDH1A3,ALKBH4,ALOX15,AMPD1,AMPD3,ANAPC16,ANKAR,ANO5,APLP2,ARF3,ARFIP2,ARHGAP27,ARHGAP30,ARHGAP4,ARHGAP6,ARHGEF25,ARHGEF3,ARHGEF40,ARHGEF6,ARID3A,ARID5B,ARL14EP,ARSG,ASB10,ASCC2,ASIC3,ASMTL,ATOH1,ATOH7,ATP11A,ATP13A1,ATP2C2,ATP8A2,AURKB,AVEN,BAHD1,BAIAP2L2,BAZ2B,BBS9,BCS1L,BHLHA9,BHMT,BICD2,BMP4,…
GO.0044424	intracellular part	564	3.37e-08	ENSP00000040738,ENSP00000078429,ENSP00000158166,ENSP00000167106,ENSP00000167588,ENSP00000180173,ENSP00000187762,ENSP00000200453,ENSP00000202625,ENSP00000206542,ENSP00000215530,ENSP00000215742,ENSP00000215904,ENSP00000216027,ENSP00000216185,ENSP00000217133,ENSP00000217244,ENSP00000217372,ENSP00000218032,ENSP00000219593,ENSP00000221455,ENSP00000221665,ENSP00000221930,ENSP00000222145,ENSP00000222219…	AASS,ABAT,ABCC10,ABI2,ABI3,ACADSB,ACTR5,ADAMTS13,ADCY4,ADPGK,AGAP3,AGPAT9,AHI1,AK7,AKT3,ALDH1A3,ALKBH4,ALOX15,AMPD1,AMPD3,ANAPC16,ANKAR,ANO5,APLP2,ARF3,ARFIP2,ARHGAP27,ARHGAP30,ARHGAP4,ARHGAP6,ARHGEF25,ARHGEF3,ARHGEF40,ARHGEF6,ARID3A,ARID5B,ARL14EP,ARSG,ASB10,ASCC2,ASIC3,ASMTL,ATOH1,ATOH7,ATP11A,ATP13A1,ATP2C2,ATP8A2,AURKB,BAHD1,BAIAP2L2,BAZ2B,BBS9,BCS1L,BHLHA9,BHMT,BICD2,BMP4,BNC1,BOD1L1,BRWD3,B…
GO.0043227	membrane-bounded organelle	518	7.78e-07	ENSP00000001008,ENSP00000040738,ENSP00000078429,ENSP00000158166,ENSP00000167106,ENSP00000187762,ENSP00000200453,ENSP00000206542,ENSP00000215530,ENSP00000215727,ENSP00000215742,ENSP00000215904,ENSP00000216027,ENSP00000216185,ENSP00000217133,ENSP00000217244,ENSP00000218032,ENSP00000219593,ENSP00000221455,ENSP00000221665,ENSP00000221930,ENSP00000222145,ENSP00000222219,ENSP00000223167,ENSP00000223210…	AASS,ABAT,ABCC10,ACADSB,ACTR1A,ACTR5,ADAMTS13,ADPGK,ADRA1A,AGPAT9,AK7,AKT3,ALDH1A3,ALKBH4,ANAPC16,ANGPTL2,ANKRD33,ANO5,APLP2,ARF3,ARFIP2,ARHGAP30,ARHGAP4,ARID3A,ARID5B,ARSG,ASB10,ASCC2,ATOH1,ATOH7,ATP11A,ATP13A1,ATP2C2,ATP8A2,AURKB,BAHD1,BAIAP2L2,BAZ2B,BBS9,BCS1L,BHLHA9,BHMT,BICD2,BMP4,BNC1,BOD1L1,BPIFB1,BRWD3,BSX,C16orf62,CA9,CACNA1A,CAMKK1,CASC4,CAV3,CBLB,CBX4,CCBL2,CCDC111,CCDC120,CCDC155,CCNB…
GO.0043226	organelle	538	1.09e-06	ENSP00000001008,ENSP00000040738,ENSP00000078429,ENSP00000158166,ENSP00000167106,ENSP00000167588,ENSP00000187762,ENSP00000200453,ENSP00000206542,ENSP00000215530,ENSP00000215727,ENSP00000215742,ENSP00000215904,ENSP00000216027,ENSP00000216185,ENSP00000217133,ENSP00000217244,ENSP00000218032,ENSP00000219593,ENSP00000221455,ENSP00000221665,ENSP00000221930,ENSP00000222145,ENSP00000222219,ENSP00000223167…	AASS,ABAT,ABCC10,ABI2,ACADSB,ACTR5,ADAMTS13,ADCY5,ADPGK,AGPAT9,AK7,AKT3,ALDH1A3,ALKBH4,ALOX15,ANAPC16,ANGPTL2,ANKRD33,APLP2,ARF3,ARFIP2,ARHGAP30,ARHGAP4,ARHGAP6,ARHGEF25,ARID3A,ARID5B,ARSG,ASB10,ASCC2,ATOH1,ATOH7,ATP11A,ATP13A1,ATP2C2,ATP8A2,AURKB,BAHD1,BAIAP2L2,BAZ2B,BBS9,BCS1L,BHLHA9,BHMT,BICD2,BMP4,BNC1,BOD1L1,BPIFB1,BRWD3,BSX,C16orf62,CA9,CACNA1A,CAMKK1,CASC4,CBLB,CBX4,CCBL2,CCDC111,CCDC120,C…
GO.0043231	intracellular membrane-bounded organelle	474	1.81e-06	ENSP00000001008,ENSP00000040738,ENSP00000078429,ENSP00000158166,ENSP00000167106,ENSP00000187762,ENSP00000200453,ENSP00000206542,ENSP00000215530,ENSP00000215742,ENSP00000216027,ENSP00000216185,ENSP00000217244,ENSP00000218032,ENSP00000219593,ENSP00000221455,ENSP00000221665,ENSP00000221930,ENSP00000222145,ENSP00000222219,ENSP00000223167,ENSP00000223210,ENSP00000224073,ENSP00000225688,ENSP00000225792…	AASS,ABAT,ABCC10,ACADSB,ACTR5,ADAMTS13,ADPGK,ADRA1A,AGPAT9,AK7,AKT3,ALKBH4,ANAPC16,ANKRD33,ANO5,APLP2,ARF3,ARFIP2,ARHGAP30,ARHGAP4,ARID3A,ARID5B,ARSG,ASB10,ASCC2,ATOH1,ATOH7,ATP11A,ATP13A1,ATP2C2,ATP8A2,AURKB,BAHD1,BAIAP2L2,BAZ2B,BCS1L,BHLHA9,BICD2,BNC1,BOD1L1,BRWD3,BSX,C16orf62,CA9,CACNA1A,CAMKK1,CASC4,CAV3,CBLB,CBX4,CCBL2,CCDC111,CCDC120,CCDC155,CCNB3,CCNE2,CCT6A,CDC14B,CDC25B,CDC45,CDCA8,CDK5R…
GO.0044464	cell part	609	1.81e-06	ENSP00000040738,ENSP00000078429,ENSP00000158166,ENSP00000167106,ENSP00000167588,ENSP00000180173,ENSP00000187762,ENSP00000200453,ENSP00000202625,ENSP00000206542,ENSP00000210633,ENSP00000215530,ENSP00000215742,ENSP00000215904,ENSP00000216027,ENSP00000216185,ENSP00000217133,ENSP00000217244,ENSP00000217372,ENSP00000218032,ENSP00000219593,ENSP00000221455,ENSP00000221466,ENSP00000221665,ENSP00000221930…	AASS,ABCC10,ABCG8,ABI2,ABI3,ACADSB,ACTR5,ADAMTS13,ADCY5,ADCYAP1,ADORA2A,ADPGK,AGAP3,AGPAT9,AJAP1,AK7,AKT3,ALDH1A3,ALKBH4,ALOX15,AMPD1,AMPD3,ANAPC16,ANKAR,ANKH,ANO5,APLP2,ARF3,ARFIP2,ARHGAP27,ARHGAP30,ARHGAP4,ARHGAP6,ARHGEF25,ARHGEF3,ARHGEF40,ARHGEF6,ARID3A,ARID5B,ARL14EP,ARSG,ASB10,ASCC2,ASIC3,ASMTL,ATOH1,ATOH7,ATP11A,ATP13A1,ATP2C2,ATP8A2,AURKB,AVEN,BAHD1,BAIAP2L2,BAZ2B,BBS9,BCS1L,BHLHA9,BHMT,BI…
GO.0005623	cell	610	1.86e-06	ENSP00000040738,ENSP00000078429,ENSP00000158166,ENSP00000167106,ENSP00000167588,ENSP00000180173,ENSP00000187762,ENSP00000200453,ENSP00000202625,ENSP00000206542,ENSP00000210633,ENSP00000215530,ENSP00000215742,ENSP00000215904,ENSP00000216027,ENSP00000216185,ENSP00000217133,ENSP00000217244,ENSP00000217372,ENSP00000218032,ENSP00000219593,ENSP00000221455,ENSP00000221466,ENSP00000221665,ENSP00000221930…	AASS,ABCC10,ABCG8,ABI2,ABI3,ACADSB,ACTR5,ADAMTS13,ADCY5,ADCYAP1,ADORA2A,ADPGK,AGAP3,AGPAT9,AJAP1,AK7,AKT3,ALDH1A3,ALKBH4,ALOX15,AMPD1,AMPD3,ANAPC16,ANKAR,ANKH,ANO5,APLP2,ARF3,ARFIP2,ARHGAP27,ARHGAP30,ARHGAP4,ARHGAP6,ARHGEF25,ARHGEF3,ARHGEF40,ARHGEF6,ARID3A,ARID5B,ARL14EP,ARSG,ASB10,ASCC2,ASIC3,ASMTL,ATOH1,ATOH7,ATP11A,ATP13A1,ATP2C2,ATP8A2,AURKB,AVEN,BAHD1,BAIAP2L2,BAZ2B,BBS9,BCS1L,BHLHA9,BHMT,BI…
GO.0043229	intracellular organelle	501	3.19e-06	ENSP00000001008,ENSP00000040738,ENSP00000078429,ENSP00000158166,ENSP00000167106,ENSP00000167588,ENSP00000187762,ENSP00000200453,ENSP00000206542,ENSP00000215530,ENSP00000215742,ENSP00000215904,ENSP00000216027,ENSP00000216185,ENSP00000217133,ENSP00000217244,ENSP00000218032,ENSP00000219593,ENSP00000221455,ENSP00000221665,ENSP00000221930,ENSP00000222145,ENSP00000222219,ENSP00000223167,ENSP00000223210…	AASS,ABAT,ABCC10,ABI2,ACADSB,ACTR5,ADAMTS13,ADPGK,AGPAT9,AHI1,AK7,AKT3,ALKBH4,ALOX15,ANAPC16,ANKRD33,ANO5,APLP2,ARF3,ARFIP2,ARHGAP30,ARHGAP4,ARHGAP6,ARHGEF25,ARID3A,ARID5B,ARSG,ASB10,ASCC2,ATOH1,ATOH7,ATP11A,ATP13A1,ATP2C2,ATP8A2,AURKB,BAHD1,BAIAP2L2,BAZ2B,BBS9,BCS1L,BHLHA9,BICD2,BNC1,BOD1L1,BRWD3,BSX,C16orf62,CA9,CACNA1A,CAMKK1,CASC4,CBLB,CBX4,CCBL2,CCDC111,CCDC120,CCDC124,CCDC135,CCDC176,CCNB3,…
GO.0044446	intracellular organelle part	357	6.95e-05	ENSP00000001008,ENSP00000040738,ENSP00000078429,ENSP00000167588,ENSP00000187762,ENSP00000200453,ENSP00000215530,ENSP00000215742,ENSP00000216027,ENSP00000216185,ENSP00000216484,ENSP00000217133,ENSP00000217244,ENSP00000218032,ENSP00000221930,ENSP00000222120,ENSP00000222145,ENSP00000224073,ENSP00000225792,ENSP00000227163,ENSP00000228027,ENSP00000228307,ENSP00000228347,ENSP00000228682,ENSP00000229340…	AASS,ABAT,ABCC10,ACADSB,ACOX3,ACTR5,ADAMTS13,ADC,ADRA1A,AGPAT9,AHI1,AKR1B1,AKT3,ANAPC16,ANO5,ARF3,ARFIP2,ARHGAP4,ARHGAP6,ARID3A,ARID5B,ARSG,ASCC2,ATP11A,ATP13A1,ATP2C2,AURKB,BAHD1,BAIAP2L2,BBS9,BCS1L,BOD1L1,CA9,CAV3,CBLB,CBX4,CCDC111,CCDC124,CCDC176,CCNB3,CCNE2,CCT6A,CDC14B,CDC25B,CDC45,CDK5RAP2,CDKL5,CDKN2AIP,CEACAM16,CENPP,CEP104,CEP76,CHD1L,CHERP,CHMP7,CHST13,CHST6,CHST7,CHST8,CHSY3,CLCN7,CLSP…
GO.0044422	organelle part	363	8.45e-05	ENSP00000001008,ENSP00000040738,ENSP00000078429,ENSP00000167588,ENSP00000187762,ENSP00000200453,ENSP00000215530,ENSP00000215742,ENSP00000216027,ENSP00000216185,ENSP00000216484,ENSP00000217133,ENSP00000217244,ENSP00000218032,ENSP00000221930,ENSP00000222120,ENSP00000222145,ENSP00000224073,ENSP00000225792,ENSP00000227163,ENSP00000228027,ENSP00000228307,ENSP00000228347,ENSP00000228682,ENSP00000229340…	AASS,ABAT,ABCC10,ACADSB,ACOX3,ACTR5,ADAMTS13,ADC,AGPAT9,AHI1,AKR1B1,AKT3,ANAPC16,ANO5,ARF3,ARFIP2,ARHGAP4,ARHGAP6,ARHGEF25,ARID3A,ARID5B,ARSG,ASCC2,ATP11A,ATP13A1,ATP2C2,AURKB,BAHD1,BAIAP2L2,BBS9,BCS1L,BOD1L1,CA9,CAV3,CBLB,CBX4,CCDC111,CCDC124,CCDC176,CCNB3,CCNE2,CCT6A,CDC14B,CDC25B,CDC45,CDK5RAP2,CDKL5,CDKN2AIP,CEACAM16,CENPP,CEP104,CEP76,CHD1L,CHERP,CHMP7,CHST13,CHST6,CHST7,CHST8,CHSY3,CLCN7,CL…
GO.0044444	cytoplasmic part	345	8.45e-05	ENSP00000078429,ENSP00000158166,ENSP00000167106,ENSP00000180173,ENSP00000187762,ENSP00000200453,ENSP00000215530,ENSP00000215904,ENSP00000216027,ENSP00000216185,ENSP00000217244,ENSP00000217961,ENSP00000218032,ENSP00000219593,ENSP00000221930,ENSP00000222145,ENSP00000222219,ENSP00000222330,ENSP00000222792,ENSP00000223167,ENSP00000225688,ENSP00000228027,ENSP00000228307,ENSP00000228347,ENSP00000228682…	AASS,ABAT,ABCC10,ABI2,ACADSB,ACTL7A,ACTR1A,ADAMTS13,ADPGK,AGPAT9,AHI1,AK7,AKT3,ALDH1A3,ALOX15,AMPD1,AMPD3,ANKRD33,ANO5,ARF3,ARFIP2,ARHGAP30,ARHGAP4,ARHGAP6,ARHGEF25,ARHGEF3,ARHGEF6,ARID3A,ARSG,ATP11A,ATP13A1,ATP2C2,ATP8A2,AURKB,BAIAP2L2,BBS9,BCS1L,BHMT,BICD2,C16orf62,CACNA1A,CACNB3,CAMKK1,CASC4,CBLB,CCBL2,CCDC111,CCDC120,CCNE2,CDA,CDC25B,CDCA8,CDK5RAP2,CDKL5,CENPP,CEP104,CEP76,CHERP,CHMP7,CHN2,CH…
GO.0005575	cellular_component	643	0.00119	ENSP00000040738,ENSP00000061240,ENSP00000078429,ENSP00000158166,ENSP00000167106,ENSP00000167588,ENSP00000187762,ENSP00000200453,ENSP00000202625,ENSP00000206423,ENSP00000206542,ENSP00000210633,ENSP00000215727,ENSP00000215742,ENSP00000215904,ENSP00000216027,ENSP00000216185,ENSP00000217133,ENSP00000217244,ENSP00000217372,ENSP00000218032,ENSP00000219593,ENSP00000221455,ENSP00000221466,ENSP00000221665…	AASS,ABCC10,ABCG8,ABHD13,ABI2,ABI3,ACADSB,ACTR5,ADAM19,ADAMTS10,ADAMTS18,ADAMTS2,ADCY4,ADCY5,ADCYAP1,ADORA2A,ADPGK,AGAP3,AGPAT9,AJAP1,AK7,AKT3,ALDH1A3,ALKBH4,ALOX15,AMPD1,AMPD3,ANAPC16,ANGPTL2,ANKAR,ANKH,APLP2,ARF3,ARFIP2,ARHGAP27,ARHGAP30,ARHGAP4,ARHGAP6,ARHGEF25,ARHGEF3,ARHGEF40,ARID3A,ARID5B,ARL14EP,ARSG,ART5,ASB10,ASCC2,ASIC3,ASMTL,ATOH1,ATOH7,ATP11A,ATP13A1,ATP2C2,ATP8A2,AURKB,AVEN,BAHD1,BAI…
GO.0031974	membrane-enclosed lumen	211	0.00119	ENSP00000001008,ENSP00000040738,ENSP00000166534,ENSP00000215530,ENSP00000215742,ENSP00000216185,ENSP00000217244,ENSP00000217961,ENSP00000221930,ENSP00000224073,ENSP00000225792,ENSP00000227163,ENSP00000228307,ENSP00000228347,ENSP00000228682,ENSP00000229812,ENSP00000229854,ENSP00000230640,ENSP00000231368,ENSP00000232424,ENSP00000234179,ENSP00000243903,ENSP00000245414,ENSP00000245838,ENSP00000245960…	AASS,ABAT,ACADSB,ACOX3,ACTR5,ADAMTS13,AKR1B1,AKT3,ARHGAP4,ARID3A,ARID5B,ARSG,ASCC2,AURKB,BAHD1,BAIAP2L2,BOD1L1,CA9,CBLB,CBX4,CCDC111,CCDC155,CCNB3,CCNE2,CDC14B,CDC25B,CDC45,CDCA8,CDKL5,CDKN2AIP,CENPP,CHD1L,CLSPN,CLU,COL25A1,COL6A1,CSNK2A1,CTR9,CTSF,CTSS,CUL1,CYTIP,DBF4,DBT,DCAF11,DDB2,DDX47,DDX5,DDX50,DENND4B,DHX8,DNAJB4,DUSP6,DUT,ECHS1,ECSIT,EDF1,EDN1,EFTUD2,ELAC2,EOGT,ERBB2IP,ERI2,EXOSC6,F8,FAM…
GO.0043233	organelle lumen	209	0.00119	ENSP00000001008,ENSP00000040738,ENSP00000166534,ENSP00000215530,ENSP00000215742,ENSP00000216185,ENSP00000217244,ENSP00000217961,ENSP00000221930,ENSP00000224073,ENSP00000225792,ENSP00000227163,ENSP00000228307,ENSP00000228347,ENSP00000228682,ENSP00000229812,ENSP00000229854,ENSP00000230640,ENSP00000231368,ENSP00000232424,ENSP00000234179,ENSP00000243903,ENSP00000245414,ENSP00000245838,ENSP00000245960…	AASS,ABAT,ACADSB,ACOX3,ACTR5,ADAMTS13,AKR1B1,AKT3,ARHGAP4,ARID3A,ARID5B,ARSG,ASCC2,AURKB,BAHD1,BAIAP2L2,BOD1L1,CA9,CBLB,CBX4,CCDC111,CCDC155,CCNB3,CCNE2,CDC14B,CDC25B,CDC45,CDCA8,CDKL5,CDKN2AIP,CENPP,CHD1L,CLSPN,CLU,COL25A1,COL6A1,CSNK2A1,CTR9,CTSF,CTSS,CUL1,CYTIP,DBF4,DBT,DCAF11,DDB2,DDX47,DDX5,DDX50,DENND4B,DHX8,DNAJB4,DUSP6,DUT,ECHS1,ECSIT,EDF1,EDN1,EFTUD2,ELAC2,EOGT,ERBB2IP,ERI2,EXOSC6,F8,FAM…
GO.0070013	intracellular organelle lumen	205	0.00161	ENSP00000001008,ENSP00000040738,ENSP00000166534,ENSP00000215530,ENSP00000215742,ENSP00000216185,ENSP00000217244,ENSP00000217961,ENSP00000221930,ENSP00000224073,ENSP00000225792,ENSP00000227163,ENSP00000228307,ENSP00000228347,ENSP00000228682,ENSP00000229812,ENSP00000229854,ENSP00000230640,ENSP00000231368,ENSP00000232424,ENSP00000234179,ENSP00000243903,ENSP00000245414,ENSP00000245838,ENSP00000245960…	AASS,ABAT,ACADSB,ACOX3,ACTR5,ADAMTS13,AKR1B1,AKT3,ARHGAP4,ARID3A,ARID5B,ARSG,ASCC2,AURKB,BAHD1,BAIAP2L2,BOD1L1,CA9,CBLB,CBX4,CCDC111,CCDC155,CCNB3,CCNE2,CDC14B,CDC25B,CDC45,CDCA8,CDKL5,CDKN2AIP,CENPP,CHD1L,CLSPN,COL25A1,COL6A1,CSNK2A1,CTR9,CTSF,CTSS,CUL1,CYTIP,DBF4,DBT,DCAF11,DDB2,DDX47,DDX5,DDX50,DENND4B,DHX8,DNAJB4,DUSP6,DUT,ECHS1,ECSIT,EDF1,EDN1,EFTUD2,ELAC2,EOGT,ERBB2IP,ERI2,EXOSC6,FAM129B,FA…
GO.1902494	catalytic complex	60	0.0109	ENSP00000078429,ENSP00000080059,ENSP00000166534,ENSP00000200453,ENSP00000216484,ENSP00000217244,ENSP00000228347,ENSP00000229812,ENSP00000229854,ENSP00000233944,ENSP00000243903,ENSP00000248572,ENSP00000256996,ENSP00000259808,ENSP00000261497,ENSP00000263253,ENSP00000263578,ENSP00000268251,ENSP00000269397,ENSP00000272286,ENSP00000284669,ENSP00000286317,ENSP00000299381,ENSP00000302478,ENSP00000304308…	ABAT,ABCG8,ACTR5,ANAPC16,BCS1L,CBX4,CSNK2A1,CTR9,CUL1,DBT,DCAF11,DDB2,DNAH1,EIF2C3,EP300,FBXO31,FOXRED1,FXYD1,GNA11,GNAL,GNGT1,GPD2,GTF2F1,HDAC7,HDAC8,IKBKG,INTS5,KBTBD10,KLHL15,KLHL25,KLHL9,MCM3,MED7,NCOA6,NEDD4,OGDHL,P4HA2,PHF15,POLE4,POLR1D,POLR3B,PPP1R15A,PRKAA1,PRKAG3,RGS6,RGS7,RIPK1,RNF2,RNF8,RUVBL2,SPTLC2,STK38,SUDS3,SUGT1,TADA1,TGFBR2,UBE2I,UBE4A,USP22,ZNF217
GO.0031012	extracellular matrix	29	0.038	ENSP00000206423,ENSP00000219593,ENSP00000221930,ENSP00000222462,ENSP00000233954,ENSP00000245451,ENSP00000251582,ENSP00000258411,ENSP00000264634,ENSP00000265113,ENSP00000270328,ENSP00000282849,ENSP00000285018,ENSP00000299421,ENSP00000308887,ENSP00000309757,ENSP00000315130,ENSP00000339067,ENSP00000339730,ENSP00000355180,ENSP00000355896,ENSP00000358727,ENSP00000360250,ENSP00000360997,ENSP00000369976…	ADAMTS10,ADAMTS13,ADAMTS18,ADAMTS2,BMP4,CCDC80,CLU,COL6A1,EGFL6,ENTPD1,ERBB2IP,FGFBP3,GSTO1,IL1RL1,ILK,LAMA1,LPL,SLC1A3,TGFB1,TGFB2,THBS4,WNT10A,WNT16,WNT5A,WNT5B,WNT7A,WNT8A,ZP2,ZP3

## Sheet: Downregulated-cellularComponent
Pathway ID	Pathway description	observed gene count	false discovery rate	matching proteins in your network (IDs)	matching proteins in your network (labels)
GO.0032432	actin filament bundle	9	0.0293	ENSP00000262269,ENSP00000263097,ENSP00000289292,ENSP00000315626,ENSP00000315757,ENSP00000340211,ENSP00000342858,ENSP00000366326,ENSP00000377789	CNN2,CORO1B,FAM101A,FERMT2,LCP1,MYH14,NEBL,SHROOM4,SYNPO
GO.0000166	nucleotide binding	100	0.0141	ENSP00000056217,ENSP00000216554,ENSP00000216639,ENSP00000217182,ENSP00000223366,ENSP00000225729,ENSP00000228284,ENSP00000230640,ENSP00000231790,ENSP00000238714,ENSP00000255448,ENSP00000258873,ENSP00000261233,ENSP00000261435,ENSP00000262269,ENSP00000262506,ENSP00000264169,ENSP00000264231,ENSP00000264663,ENSP00000264867,ENSP00000265022,ENSP00000268482,ENSP00000270112,ENSP00000270238,ENSP00000284719…	ABCA3,ACSBG1,ACSM5,ACTR8,ADRBK1,ADSS,AK2,ALPK2,ARHGEF5,ATP13A4,ATP2A3,CDC42BPA,CDKL1,CNP,COASY,CSNK2A2,CTBP1,DCLK1,DCLK2,DDX11,DDX41,DGKG,DGKH,DHX38,DIRAS2,DNAH11,DRG2,EEF1A2,EIF5,EPHA10,FASN,GBP2,GCK,GEM,GIMAP1,HIPK3,HNRPDL,HSPA14,HUNK,IARS2,IDH3A,IMPDH2,IRAK3,KCNT2,KDM1A,LMTK3,MAOA,MAP3K1,MAP3K15,MAP3K4,MAPK7,MKI67IP,MLH1,MOCS1,MYH14,N4BP2,NEK10,NEK11,NLRP14,NLRX1,NNT,OLA1,ORC4,PAPOLG,PDE2A,PDE…
GO.0001882	nucleoside binding	83	0.0141	ENSP00000056217,ENSP00000216554,ENSP00000216639,ENSP00000217182,ENSP00000223366,ENSP00000225729,ENSP00000230640,ENSP00000231790,ENSP00000238714,ENSP00000255448,ENSP00000258873,ENSP00000261233,ENSP00000261435,ENSP00000262269,ENSP00000262506,ENSP00000264169,ENSP00000265022,ENSP00000268482,ENSP00000270112,ENSP00000270238,ENSP00000284719,ENSP00000289153,ENSP00000292199,ENSP00000294725,ENSP00000297596…	ABCA3,ACSBG1,ACSM5,ACTR8,ADRBK1,ADSS,AK2,ALPK2,APAF1,ARHGEF5,ATP13A4,ATP2A3,CDC42BPA,CDKL1,COASY,CSNK2A2,DCLK1,DCLK2,DDX11,DDX41,DGKG,DGKH,DHX38,DIRAS2,DNAH11,DRG2,EEF1A2,EIF5,EPHA10,GBP2,GCK,GEM,GIMAP1,HIPK3,HSPA14,HUNK,IARS2,IRAK3,KCNT2,LMTK3,MAP3K1,MAP3K15,MAP3K4,MAPK7,MLH1,MOCS1,MYH14,N4BP2,NEK10,NEK11,NLRP14,NLRX1,OLA1,ORC4,PAPOLG,PDK2,PDPK1,PFKP,PIK3CB,PRKACA,PRKCE,RAB28,RAB8A,RNF112,RPS6KA…
GO.0003674	molecular_function	401	0.0141	ENSP00000026218,ENSP00000029410,ENSP00000162023,ENSP00000188790,ENSP00000206513,ENSP00000210060,ENSP00000216554,ENSP00000216639,ENSP00000216832,ENSP00000219833,ENSP00000220584,ENSP00000221086,ENSP00000221566,ENSP00000222115,ENSP00000223366,ENSP00000225388,ENSP00000225665,ENSP00000225729,ENSP00000225899,ENSP00000225916,ENSP00000227348,ENSP00000228606,ENSP00000229179,ENSP00000230053,ENSP00000230640…	ABCA3,ABHD4,ACBD3,ACP6,ACSBG1,ACSM5,ACTR8,ADAL,ADAMTS4,ADAP1,ADPRHL2,ADRB2,ADRBK1,ADSS,AHRR,AIM1,AK2,ALDOB,ALG9,ALPK2,ALPL,ALX1,ANK3,APC,ARHGEF33,ARL6IP4,ARPC2,ASAP3,ASB2,ASPH,ATCAY,ATP13A4,ATP2A3,B3GAT2,B4GALT7,BACH2,BBS7,BCAR3,BCL11B,BCL2L10,BTD,C12orf52,C1RL,C2CD4A,CACTIN,CASR,CBX6,CCDC48,CCDC79,CD109,CD2BP2,CD86,CDC42BPA,CDH1,CDH18,CDK5RAP3,CDKL1,CDT1,CEBPE,CENPV,CEP250,CERS2,CES2,CETN2,CHRNB…
GO.0005488	binding	343	0.0141	ENSP00000000412,ENSP00000029410,ENSP00000056217,ENSP00000162023,ENSP00000188790,ENSP00000206513,ENSP00000216554,ENSP00000216639,ENSP00000216832,ENSP00000217182,ENSP00000221566,ENSP00000223366,ENSP00000225388,ENSP00000225665,ENSP00000225729,ENSP00000227348,ENSP00000228606,ENSP00000230053,ENSP00000230640,ENSP00000230658,ENSP00000231461,ENSP00000231790,ENSP00000233575,ENSP00000235310,ENSP00000237275…	ABCA3,ACBD3,ACSBG1,ACSM5,ACTR8,ADAL,ADAMTS4,ADAP1,ADPRHL2,ADRBK1,ADSS,AGER,AHRR,AIM1,AK2,ALDOB,ALPK2,ALPL,ALX1,ANK3,APC,ARHGEF5,ARL6IP4,ASAP3,ASPH,ATCAY,ATP13A4,ATP2A3,B3GAT2,B4GALT7,BACH2,BBS7,BCL11B,BCL2L10,BMP1,C12orf52,C2CD4A,CA3,CACTIN,CBX6,CCDC48,CCDC79,CD109,CD2BP2,CDC42BPA,CDH1,CDH18,CDK5RAP3,CDKL1,CDT1,CEBPE,CEP250,CERS2,CETN2,CHRNB4,CLOCK,CLSTN2,CNDP1,CNN2,CNP,CNTLN,CNTN1,CNTROB,COASY,C…
GO.0032555	purine ribonucleotide binding	85	0.0141	ENSP00000056217,ENSP00000216554,ENSP00000216639,ENSP00000217182,ENSP00000223366,ENSP00000225729,ENSP00000230640,ENSP00000231790,ENSP00000238714,ENSP00000255448,ENSP00000258873,ENSP00000261233,ENSP00000261435,ENSP00000262269,ENSP00000262506,ENSP00000264169,ENSP00000264231,ENSP00000265022,ENSP00000268482,ENSP00000270112,ENSP00000270238,ENSP00000284719,ENSP00000289153,ENSP00000292199,ENSP00000294725…	ABCA3,ACSBG1,ACSM5,ACTR8,ADRBK1,ADSS,AK2,ALPK2,APAF1,ARHGEF5,ATP13A4,ATP2A3,CDC42BPA,CDKL1,COASY,CSNK2A2,DCLK1,DCLK2,DDX11,DDX41,DGKG,DGKH,DHX38,DIRAS2,DNAH11,DRG2,EEF1A2,EIF5,EPHA10,GBP2,GCK,GEM,GIMAP1,HIPK3,HSPA14,HUNK,IARS2,IRAK3,KCNT2,LMTK3,MAP3K1,MAP3K15,MAP3K4,MAPK7,MLH1,MOCS1,MYH14,N4BP2,NEK10,NEK11,NLRP14,NLRX1,OLA1,ORC4,PAPOLG,PDE2A,PDE3A,PDK2,PDPK1,PFKP,PIK3CB,POPDC2,PRKACA,PRKCE,RAB28,…
GO.0032559	adenyl ribonucleotide binding	72	0.0141	ENSP00000216639,ENSP00000223366,ENSP00000230640,ENSP00000231790,ENSP00000238714,ENSP00000255448,ENSP00000258873,ENSP00000261233,ENSP00000261435,ENSP00000262269,ENSP00000262506,ENSP00000264169,ENSP00000264231,ENSP00000265022,ENSP00000268482,ENSP00000270112,ENSP00000270238,ENSP00000284719,ENSP00000286063,ENSP00000289153,ENSP00000292199,ENSP00000294725,ENSP00000298139,ENSP00000299481,ENSP00000300305…	ABCA3,ACSBG1,ACSM5,ACTR8,ADRBK1,AK2,ALPK2,APAF1,ATP13A4,ATP2A3,CDC42BPA,CDKL1,COASY,CSNK2A2,DCLK1,DCLK2,DDX11,DDX41,DGKG,DGKH,DHX38,DNAH11,EPHA10,GCK,HIPK3,HSPA14,HUNK,IARS2,IRAK3,KCNT2,LMTK3,MAP3K1,MAP3K15,MAP3K4,MAPK7,MLH1,MYH14,N4BP2,NEK10,NEK11,NLRP14,NLRX1,OLA1,ORC4,PAPOLG,PDE11A,PDE2A,PDE3A,PDK2,PDPK1,PFKP,PIK3CB,POPDC2,PRKACA,PRKCE,RPS6KA4,RUNX1,RUNX2,SKIV2L2,SMG1,TCP1,TESK1,TOP2B,TTK,TUT1…
GO.0036094	small molecule binding	110	0.0141	ENSP00000056217,ENSP00000216554,ENSP00000216639,ENSP00000217182,ENSP00000223366,ENSP00000225729,ENSP00000228284,ENSP00000230640,ENSP00000231461,ENSP00000231790,ENSP00000238714,ENSP00000255448,ENSP00000257264,ENSP00000258873,ENSP00000261233,ENSP00000261435,ENSP00000262269,ENSP00000262506,ENSP00000264169,ENSP00000264231,ENSP00000264663,ENSP00000264867,ENSP00000265022,ENSP00000265846,ENSP00000268150…	ABCA3,ACSBG1,ACSM5,ACTR8,ADAP1,ADRBK1,ADSS,AK2,ALAS2,ALDOB,ALPK2,ARHGEF5,ATP13A4,ATP2A3,CDC42BPA,CDKL1,CNP,COASY,CSNK2A2,CTBP1,DCLK1,DCLK2,DDX11,DDX41,DGKG,DGKH,DHX38,DIRAS2,DNAH11,DRG2,EEF1A2,EIF5,EPHA10,FASN,GBP2,GCK,GEM,GIMAP1,HIPK3,HNRPDL,HSPA14,HUNK,IARS2,IDH3A,IMPDH2,IRAK3,KCNT2,KDM1A,LMTK3,MAOA,MAP3K1,MAP3K15,MAP3K4,MAPK7,MFGE8,MKI67IP,MLH1,MOCS1,MYH14,N4BP2,NEK10,NEK11,NLRP14,NLRX1,NNT,NR…
GO.0043168	anion binding	114	0.0141	ENSP00000056217,ENSP00000216554,ENSP00000216639,ENSP00000217182,ENSP00000223366,ENSP00000225729,ENSP00000230640,ENSP00000231461,ENSP00000231790,ENSP00000233575,ENSP00000238714,ENSP00000255448,ENSP00000258873,ENSP00000260950,ENSP00000261205,ENSP00000261233,ENSP00000261435,ENSP00000262269,ENSP00000262506,ENSP00000263033,ENSP00000264144,ENSP00000264169,ENSP00000264231,ENSP00000265022,ENSP00000265447…	ABCA3,ACBD3,ACSBG1,ACSM5,ACTR8,ADAP1,ADRBK1,ADSS,AK2,ALDOB,ALPK2,ANXA11,APAF1,ARHGEF5,ATP13A4,ATP2A3,C2CD4A,CDC42BPA,CDKL1,COASY,CSNK2A2,DCLK1,DCLK2,DDX11,DDX41,DGKG,DGKH,DHX38,DIRAS2,DNAH11,DRG2,EEA1,EEF1A2,EIF5,EPHA10,FASN,FERMT2,GBP2,GCK,GEM,GIMAP1,HIPK3,HSPA14,HUNK,IARS2,IRAK3,ITGAM,KCNT2,KDM1A,KRIT1,LAMC2,LMTK3,MAOA,MAP3K1,MAP3K15,MAP3K4,MAPK7,MFGE8,MLH1,MOCS1,MSTN,MTM1,MYH14,N4BP2,NEK10,NEK…
GO.0097367	carbohydrate derivative binding	96	0.0141	ENSP00000056217,ENSP00000216554,ENSP00000216639,ENSP00000217182,ENSP00000223366,ENSP00000225729,ENSP00000230640,ENSP00000231461,ENSP00000231790,ENSP00000238714,ENSP00000255448,ENSP00000258873,ENSP00000260950,ENSP00000261233,ENSP00000261435,ENSP00000261769,ENSP00000262269,ENSP00000262506,ENSP00000264144,ENSP00000264169,ENSP00000264231,ENSP00000265022,ENSP00000268150,ENSP00000268482,ENSP00000270112…	ABCA3,ACSBG1,ACSM5,ACTR8,ADRBK1,ADSS,AK2,ALPK2,APAF1,ARHGEF5,ATP13A4,ATP2A3,CDC42BPA,CDH1,CDKL1,COASY,CSNK2A2,DCLK1,DCLK2,DDX11,DDX41,DGKG,DGKH,DHX38,DIRAS2,DNAH11,DRG2,EEF1A2,EIF5,EPHA10,GBP2,GCK,GEM,GIMAP1,HIPK3,HSPA14,HUNK,IARS2,IRAK3,KCNT2,LAMC2,LMTK3,MAP3K1,MAP3K15,MAP3K4,MAPK7,MFGE8,MLH1,MOCS1,MSTN,MYH14,N4BP2,NEK10,NEK11,NLRP14,NLRX1,OLA1,ORC4,PAPOLG,PDE2A,PDE3A,PDK2,PDPK1,PFKP,PGLYRP2,PIK…
GO.1901363	heterocyclic compound binding	200	0.0141	ENSP00000056217,ENSP00000162023,ENSP00000206513,ENSP00000216554,ENSP00000216639,ENSP00000216832,ENSP00000217182,ENSP00000223366,ENSP00000225388,ENSP00000225665,ENSP00000225729,ENSP00000228515,ENSP00000228606,ENSP00000230640,ENSP00000230658,ENSP00000231790,ENSP00000238714,ENSP00000240328,ENSP00000244669,ENSP00000244769,ENSP00000248420,ENSP00000249504,ENSP00000250916,ENSP00000252543,ENSP00000255448…	ABCA3,ACSBG1,ACSM5,ACTR8,ADRBK1,ADSS,AHRR,AK2,ALAS2,ALPK2,ALX1,ANXA11,APOBEC2,ARHGEF5,ARL6IP4,ATP13A4,ATP2A3,ATXN1,BACH2,BARD1,BCL11B,CACTIN,CBX6,CCDC79,CDC42BPA,CDKL1,CDT1,CEBPE,CERS2,CLOCK,CNP,COASY,CPSF2,CR2,CSNK2A2,CSRNP2,CTBP1,CTC1,CYP27A1,CYP27B1,CYP46A1,DCLK1,DCLK2,DDX11,DEK,DGKG,DGKH,DHX38,DIRAS2,DMRTA1,DNAH11,DNAJC21,DRG2,EEF1A2,EIF2C1,EIF5,EPHA10,FLYWCH2,FNDC3B,FOSL1,FOXL1,FUBP3,GADD45A…
GO.0032550	purine ribonucleoside binding	82	0.0143	ENSP00000056217,ENSP00000216554,ENSP00000216639,ENSP00000217182,ENSP00000223366,ENSP00000225729,ENSP00000230640,ENSP00000231790,ENSP00000238714,ENSP00000255448,ENSP00000258873,ENSP00000261233,ENSP00000261435,ENSP00000262269,ENSP00000262506,ENSP00000264169,ENSP00000265022,ENSP00000268482,ENSP00000270112,ENSP00000270238,ENSP00000284719,ENSP00000289153,ENSP00000292199,ENSP00000294725,ENSP00000297596…	ABCA3,ACSBG1,ACSM5,ACTR8,ADRBK1,ADSS,AK2,ALPK2,APAF1,ARHGEF5,ATP13A4,ATP2A3,CDC42BPA,CDKL1,COASY,CSNK2A2,DCLK1,DCLK2,DDX11,DDX41,DGKG,DGKH,DHX38,DIRAS2,DNAH11,DRG2,EEF1A2,EIF5,EPHA10,GBP2,GCK,GEM,GIMAP1,HIPK3,HSPA14,HUNK,IARS2,IRAK3,KCNT2,LMTK3,MAP3K1,MAP3K15,MAP3K4,MAPK7,MLH1,MOCS1,MYH14,N4BP2,NEK10,NEK11,NLRP14,NLRX1,OLA1,ORC4,PAPOLG,PDK2,PDPK1,PFKP,PIK3CB,PRKACA,PRKCE,RAB28,RAB8A,RNF112,RPS6KA…
GO.0035639	purine ribonucleoside triphosphate binding	82	0.0143	ENSP00000056217,ENSP00000216554,ENSP00000216639,ENSP00000217182,ENSP00000223366,ENSP00000225729,ENSP00000230640,ENSP00000231790,ENSP00000238714,ENSP00000255448,ENSP00000258873,ENSP00000261233,ENSP00000261435,ENSP00000262269,ENSP00000262506,ENSP00000264169,ENSP00000265022,ENSP00000268482,ENSP00000270112,ENSP00000270238,ENSP00000284719,ENSP00000289153,ENSP00000292199,ENSP00000294725,ENSP00000297596…	ABCA3,ACSBG1,ACSM5,ACTR8,ADRBK1,ADSS,AK2,ALPK2,APAF1,ARHGEF5,ATP13A4,ATP2A3,CDC42BPA,CDKL1,COASY,CSNK2A2,DCLK1,DCLK2,DDX11,DDX41,DGKG,DGKH,DHX38,DIRAS2,DNAH11,DRG2,EEF1A2,EIF5,EPHA10,GBP2,GCK,GEM,GIMAP1,HIPK3,HSPA14,HUNK,IARS2,IRAK3,KCNT2,LMTK3,MAP3K1,MAP3K15,MAP3K4,MAPK7,MLH1,MOCS1,MYH14,N4BP2,NEK10,NEK11,NLRP14,NLRX1,OLA1,ORC4,PAPOLG,PDK2,PDPK1,PFKP,PIK3CB,PRKACA,PRKCE,RAB28,RAB8A,RNF112,RPS6KA…
GO.0043167	ion binding	218	0.0143	ENSP00000000442,ENSP00000029410,ENSP00000056217,ENSP00000216554,ENSP00000216639,ENSP00000217182,ENSP00000223366,ENSP00000225729,ENSP00000228606,ENSP00000229304,ENSP00000230053,ENSP00000230640,ENSP00000230658,ENSP00000231461,ENSP00000231790,ENSP00000233575,ENSP00000237275,ENSP00000238714,ENSP00000239449,ENSP00000244669,ENSP00000247668,ENSP00000250916,ENSP00000250937,ENSP00000253303,ENSP00000255448…	ABCA3,ACBD3,ACSBG1,ACSM5,ACTR8,ADAL,ADAMTS4,ADAP1,ADPRHL2,ADRB2,ADRBK1,ADSS,AGBL5,AK2,ALDOB,ALPK2,ALPL,ANXA11,APAF1,APOBEC1,APOBEC2,ARHGEF5,ASAP3,ASPH,ASXL2,ATP13A4,ATP2A3,B3GAT2,B4GALT7,BARD1,BCL11B,BMP1,C2CD4A,CA3,CCDC48,CDC42BPA,CDH1,CDH18,CDKL1,CETN2,CHRNB4,CLSTN2,CNDP1,COASY,COL5A2,COX11,CSNK2A2,CYP27A1,CYP27B1,CYP46A1,DCLK1,DCLK2,DDX11,DDX41,DGKG,DGKH,DHH,DHX38,DIRAS2,DMRTA1,DNAH11,DNAJC21,…
GO.0097159	organic cyclic compound binding	200	0.019	ENSP00000056217,ENSP00000162023,ENSP00000206513,ENSP00000216554,ENSP00000216639,ENSP00000216832,ENSP00000217182,ENSP00000223366,ENSP00000225388,ENSP00000225665,ENSP00000225729,ENSP00000228515,ENSP00000228606,ENSP00000230640,ENSP00000230658,ENSP00000231790,ENSP00000238714,ENSP00000240328,ENSP00000244669,ENSP00000244769,ENSP00000248420,ENSP00000249504,ENSP00000250916,ENSP00000252543,ENSP00000255448…	ABCA3,ACSBG1,ACSM5,ACTR8,ADRBK1,ADSS,AHRR,AK2,ALAS2,ALPK2,ALX1,ANXA11,APOBEC2,ARHGEF5,ARL6IP4,ATP13A4,ATP2A3,ATXN1,BACH2,BARD1,BCL11B,CACTIN,CBX6,CCDC79,CDC42BPA,CDKL1,CDT1,CEBPE,CERS2,CLOCK,CNP,COASY,CPSF2,CR2,CSNK2A2,CSRNP2,CTBP1,CTC1,CYP27A1,CYP27B1,CYP46A1,DCLK1,DCLK2,DDX11,DEK,DGKG,DGKH,DHX38,DIRAS2,DMRTA1,DNAH11,DNAJC21,DRG2,EEF1A2,EIF2C1,EIF5,EPHA10,FLYWCH2,FNDC3B,FOSL1,FOXL1,FUBP3,GADD45A…
GO.0005524	ATP binding	68	0.0267	ENSP00000216639,ENSP00000223366,ENSP00000230640,ENSP00000231790,ENSP00000238714,ENSP00000255448,ENSP00000258873,ENSP00000261233,ENSP00000261435,ENSP00000262269,ENSP00000262506,ENSP00000264169,ENSP00000265022,ENSP00000268482,ENSP00000270112,ENSP00000270238,ENSP00000284719,ENSP00000289153,ENSP00000292199,ENSP00000294725,ENSP00000298139,ENSP00000299481,ENSP00000300305,ENSP00000301732,ENSP00000303279…	ABCA3,ACSBG1,ACSM5,ACTR8,ADRBK1,AK2,ALPK2,APAF1,ATP13A4,ATP2A3,CDC42BPA,CDKL1,COASY,CSNK2A2,DCLK1,DCLK2,DDX11,DDX41,DGKG,DGKH,DHX38,DNAH11,EPHA10,GCK,HIPK3,HSPA14,HUNK,IARS2,IRAK3,KCNT2,LMTK3,MAP3K1,MAP3K15,MAP3K4,MAPK7,MLH1,MYH14,N4BP2,NEK10,NEK11,NLRP14,NLRX1,OLA1,ORC4,PAPOLG,PDK2,PDPK1,PFKP,PIK3CB,PRKACA,PRKCE,RPS6KA4,RUNX1,RUNX2,SKIV2L2,SMG1,TCP1,TESK1,TOP2B,TTK,TUT1,TWF1,UBE2J1,UBE2O,UCK2,VR…
GO.0043169	cation binding	158	0.0276	ENSP00000000442,ENSP00000029410,ENSP00000228606,ENSP00000229304,ENSP00000230053,ENSP00000230658,ENSP00000237275,ENSP00000238714,ENSP00000239449,ENSP00000244669,ENSP00000247668,ENSP00000250916,ENSP00000250937,ENSP00000253303,ENSP00000256398,ENSP00000258415,ENSP00000260229,ENSP00000260947,ENSP00000261205,ENSP00000261233,ENSP00000261751,ENSP00000261769,ENSP00000261835,ENSP00000262366,ENSP00000262407…	ACSM5,ADAL,ADAMTS4,ADAP1,ADPRHL2,ADRB2,ADSS,AGBL5,ALAS2,ALDOB,ALPL,ANXA11,APOBEC1,APOBEC2,ASAP3,ASPH,ASXL2,ATP13A4,ATP2A3,B3GAT2,B4GALT7,BARD1,BCL11B,BMP1,C2CD4A,CA3,CCDC48,CDC42BPA,CDH1,CDH18,CETN2,CHRNB4,CLSTN2,CNDP1,COL5A2,COX11,CYP27A1,CYP27B1,CYP46A1,DDX11,DDX41,DGKG,DGKH,DHH,DMRTA1,DNAJC21,DOHH,EEA1,EFCAB4A,ELP3,EMR1,ENOSF1,ESRRA,FASN,GEM,GLIS2,GZF1,IDH3A,IMPDH2,INPP5B,IRAK3,ISCA1,ISL1,ITGA…
GO.0046872	metal ion binding	154	0.0466	ENSP00000000442,ENSP00000029410,ENSP00000228606,ENSP00000229304,ENSP00000230053,ENSP00000230658,ENSP00000237275,ENSP00000238714,ENSP00000239449,ENSP00000244669,ENSP00000247668,ENSP00000250916,ENSP00000250937,ENSP00000253303,ENSP00000256398,ENSP00000258415,ENSP00000260229,ENSP00000260947,ENSP00000261205,ENSP00000261233,ENSP00000261769,ENSP00000261835,ENSP00000262366,ENSP00000262407,ENSP00000263033…	ACSM5,ADAL,ADAMTS4,ADAP1,ADPRHL2,ADSS,AGBL5,ALPL,ANXA11,APOBEC1,APOBEC2,ASAP3,ASPH,ASXL2,ATP13A4,ATP2A3,B3GAT2,B4GALT7,BARD1,BCL11B,BMP1,C2CD4A,CA3,CCDC48,CDC42BPA,CDH1,CDH18,CETN2,CLSTN2,CNDP1,COL5A2,COX11,CYP27A1,CYP27B1,CYP46A1,DDX11,DDX41,DGKG,DGKH,DHH,DMRTA1,DNAJC21,DOHH,EEA1,EFCAB4A,ELP3,EMR1,ENOSF1,ESRRA,FASN,GEM,GLIS2,GZF1,IDH3A,IMPDH2,INPP5B,IRAK3,ISCA1,ISL1,ITGA2B,ITGAM,ITGB7,KLF11,KLF1…
GO.0007275	multicellular organismal development	159	0.0191	ENSP00000000442,ENSP00000162023,ENSP00000188790,ENSP00000206513,ENSP00000216211,ENSP00000221855,ENSP00000223366,ENSP00000225916,ENSP00000228284,ENSP00000228606,ENSP00000230658,ENSP00000231461,ENSP00000238081,ENSP00000239449,ENSP00000240328,ENSP00000244769,ENSP00000248420,ENSP00000249373,ENSP00000253303,ENSP00000256398,ENSP00000257430,ENSP00000258443,ENSP00000258873,ENSP00000260502,ENSP00000260950…	ACSBG1,ADAMTS4,ADRB2,ADRBK1,ALAS2,ALDOB,ANK3,ANKS1A,APC,ARPC2,ASB2,ASPH,ASTN1,ATCAY,ATXN1,BBS7,BCAR3,BCL11B,BMP1,BTD,C12orf52,C14orf39,C6orf70,CACTIN,CCHCR1,CCSAP,CD109,CD86,CDH1,CDK5RAP3,CDKL1,CEBPE,CNN2,CR2,CSNK2A2,CSPG5,CTC1,CUL5,CYLC1,CYP27B1,CYP46A1,DDX41,DGKG,DHH,DLG4,DMRTA1,DNAH11,DONSON,EDAR,EIF4ENIF1,ELP3,EPHA10,ESRRA,FAM101A,FAP,FASN,FOSL1,FOXL1,GCK,GIMAP1,GLIS2,GNPAT,GPR161,GPRIN1,GZF1…
GO.0032502	developmental process	174	0.0306	ENSP00000000442,ENSP00000162023,ENSP00000188790,ENSP00000206513,ENSP00000221855,ENSP00000223366,ENSP00000225899,ENSP00000225916,ENSP00000228284,ENSP00000228606,ENSP00000230658,ENSP00000231461,ENSP00000238081,ENSP00000239449,ENSP00000240328,ENSP00000242591,ENSP00000244426,ENSP00000244769,ENSP00000248420,ENSP00000249373,ENSP00000250495,ENSP00000253303,ENSP00000256398,ENSP00000257430,ENSP00000258873…	ACSBG1,ADAMTS4,ADRB2,ADRBK1,ALAS2,ALDOB,ANK3,ANKS1A,APC,ARPC2,ASB2,ASPH,ASTN1,ATCAY,ATXN1,BBS7,BCAR3,BCL11B,BMP1,BTD,C12orf52,C14orf39,C6orf70,CACTIN,CASR,CCHCR1,CCSAP,CD109,CD86,CDH1,CDK5RAP3,CDKL1,CEBPE,CEP250,CNN2,CR2,CSNK2A2,CSPG5,CTBP1,CTC1,CUL5,CYLC1,CYP27B1,CYP46A1,DAPL1,DDX41,DGKG,DHH,DLG4,DNAH11,DONSON,EIF4ENIF1,ELP3,EPHA10,ESRRA,FAM101A,FAP,FBXO9,FERMT2,FOSL1,FOXL1,FZD1,GCK,GIMAP1,GLIS2…
GO.0009214	cyclic nucleotide catabolic process	6	0.0339	ENSP00000282096,ENSP00000286063,ENSP00000334910,ENSP00000347689,ENSP00000351957,ENSP00000377470	CNP,PDE11A,PDE2A,PDE3A,PDE3B,PDE4C

## Sheet: Upregulated-MolecularFunction
Pathway ID	Pathway description	observed gene count	false discovery rate	matching proteins in your network (IDs)	matching proteins in your network (labels)
GO.0005488	binding	477	2.17e-05	ENSP00000040738,ENSP00000061240,ENSP00000078429,ENSP00000080059,ENSP00000158166,ENSP00000166534,ENSP00000200453,ENSP00000202625,ENSP00000206423,ENSP00000206542,ENSP00000215727,ENSP00000215742,ENSP00000215904,ENSP00000216027,ENSP00000216484,ENSP00000217133,ENSP00000217244,ENSP00000217372,ENSP00000217961,ENSP00000219593,ENSP00000221466,ENSP00000221930,ENSP00000222120,ENSP00000222219,ENSP00000222330…	ABAT,ABCC10,ABCG8,ABI2,ACADSB,ACTR1A,ADAM19,ADAMTS10,ADAMTS13,ADAMTS18,ADAMTS2,ADCY4,ADCY5,ADCYAP1,ADORA2A,ADPGK,ADRA1A,AGAP3,AHI1,AK7,AKT3,ALKBH4,ALOX15,AMPD1,AMPD3,ANGPTL2,ANKAR,ANKIB1,APLP2,ARF3,ARFIP2,ARHGAP27,ARHGAP4,ARHGAP6,ARID3A,ARID5B,ARSG,ATOH1,ATOH7,ATP11A,ATP13A1,ATP2C2,ATP7B,ATP8A2,AURKB,BAHD1,BAIAP2L2,BAZ2B,BCS1L,BHLHA9,BHMT,BICD2,BMP4,BNC1,BOD1L1,BPIFB1,BSX,C1orf35,CA9,CACNA1A,CAMK…
GO.0043167	ion binding	307	0.000127	ENSP00000001008,ENSP00000061240,ENSP00000078429,ENSP00000080059,ENSP00000158166,ENSP00000166534,ENSP00000202625,ENSP00000206423,ENSP00000206542,ENSP00000215727,ENSP00000215742,ENSP00000215904,ENSP00000216027,ENSP00000216484,ENSP00000217133,ENSP00000217244,ENSP00000217372,ENSP00000217961,ENSP00000221665,ENSP00000222120,ENSP00000222330,ENSP00000222792,ENSP00000223167,ENSP00000223210,ENSP00000225688…	ABAT,ABCC10,ABCG8,ACADSB,ACOX3,ACTR1A,ADAM19,ADAMTS10,ADAMTS13,ADAMTS18,ADAMTS2,ADCY4,ADCY5,ADPGK,AGAP3,AK7,AKT3,ALDH1A3,ALKBH4,ALOX15,AMPD1,AMPD3,ANKIB1,APLP2,ARF3,ARFIP2,ARSG,ATP11A,ATP13A1,ATP2C2,ATP7B,ATP8A2,AURKB,BAIAP2L2,BAZ2B,BCS1L,BHMT,BMP4,BNC1,CA9,CACNA1A,CAMKK1,CCBL2,CCDC111,CCDC80,CCT6A,CDA,CDC42BPG,CDH2,CDH20,CDK17,CDK5RAP1,CDKL5,CHD1L,CHN2,CHP2,CHSY3,CLCN7,CLPB,COL25A1,CSNK2A1,CTPS1…
GO.0005515	protein binding	237	0.000661	ENSP00000001008,ENSP00000078429,ENSP00000080059,ENSP00000200453,ENSP00000215742,ENSP00000215904,ENSP00000217244,ENSP00000217372,ENSP00000219593,ENSP00000221466,ENSP00000221665,ENSP00000221930,ENSP00000222120,ENSP00000222330,ENSP00000222462,ENSP00000222792,ENSP00000225792,ENSP00000227163,ENSP00000228027,ENSP00000228307,ENSP00000229268,ENSP00000229812,ENSP00000232424,ENSP00000233202,ENSP00000233944…	ABAT,ABCG8,ABI2,ACOX3,ADAMTS13,ADCY5,ADCYAP1,ADORA2A,ADRA1A,AHI1,ALDH1A3,ALKBH4,ANGPTL2,ANKAR,APLP2,ARFIP2,ARHGAP27,ARHGAP4,ARHGAP6,BAIAP2L2,BHLHA9,BICD2,BMP4,CACNA1A,CAV3,CBX4,CCL21,CCT6A,CDA,CDC25B,CDH2,CDK5RAP1,CDK5RAP2,CDKL5,CDKN2AIP,CEACAM16,CHERP,CHN2,CLSPN,CLU,COL6A1,CSNK2A1,CTNNA1,CTR9,CTSS,CYP2E1,DBT,DDX5,DDX58,DGAT2,DHRS4,DHX8,DNAJB4,DRD2,EDN1,EGFL6,EHD1,EMD,EP300,EPB49,EPHX2,ERBB2IP,ER…
GO.0003824	catalytic activity	258	0.00304	ENSP00000001008,ENSP00000061240,ENSP00000078429,ENSP00000080059,ENSP00000158166,ENSP00000169298,ENSP00000202625,ENSP00000206542,ENSP00000215904,ENSP00000216484,ENSP00000217133,ENSP00000217244,ENSP00000217372,ENSP00000217961,ENSP00000222120,ENSP00000222219,ENSP00000222330,ENSP00000225276,ENSP00000225688,ENSP00000225792,ENSP00000228347,ENSP00000229340,ENSP00000229812,ENSP00000229854,ENSP00000230640…	AASS,ABAT,ABCC10,ABCG8,ABHD13,ACADSB,ADAM19,ADAMTS10,ADAMTS18,ADAMTS2,ADC,ADCY4,ADCY5,ADPGK,AGPAT9,AK7,AKR1B1,AKT3,ALDH1A3,ALKBH4,AMPD1,AMPD3,ARF3,ARSG,ART5,ASMTL,ATP11A,ATP13A1,ATP2C2,ATP7B,ATP8A2,AURKB,BHMT,CA9,CAMKK1,CBLB,CBX4,CCBL2,CCDC111,CDA,CDC25B,CDC42BPG,CDC45,CDK17,CDK5RAP1,CDKL5,CHD1L,CHST13,CHST6,CHST7,CHST8,CHSY3,CLIC2,CLPB,COX7C,CSNK2A1,CTPS1,CTSF,CTSS,CYP2E1,CYP2J2,CYP4V2,CYP4X1,CY…
GO.0003674	molecular_function	541	0.00317	ENSP00000040738,ENSP00000061240,ENSP00000078429,ENSP00000080059,ENSP00000158166,ENSP00000167588,ENSP00000169298,ENSP00000187762,ENSP00000200453,ENSP00000202625,ENSP00000206423,ENSP00000206542,ENSP00000215727,ENSP00000215742,ENSP00000215904,ENSP00000216027,ENSP00000217133,ENSP00000217244,ENSP00000217961,ENSP00000219593,ENSP00000221466,ENSP00000221930,ENSP00000222120,ENSP00000222219,ENSP00000222330…	AASS,ABAT,ABCC10,ABCG8,ABHD13,ABI2,ACTL7A,ACTR1A,ADAM19,ADAMTS10,ADAMTS18,ADCY4,ADCY5,ADCYAP1,ADORA2A,ADPGK,ADRA1A,AGAP3,AGPAT9,AHI1,AK7,AKR1B1,AKT3,ALKBH4,AMPD1,AMPD3,ANGPTL2,ANKAR,ANKIB1,ANO5,APLP2,ARF3,ARFIP2,ARHGAP27,ARHGAP30,ARHGAP4,ARHGAP6,ARHGEF25,ARHGEF3,ARHGEF40,ARHGEF6,ARID3A,ARID5B,ARSG,ART5,ASMTL,ATOH7,ATP11A,ATP13A1,ATP2C2,ATP7B,ATP8A2,AURKB,BAHD1,BAIAP2L2,BAZ2B,BCS1L,BHLHA9,BHMT,BIC…
GO.0043168	anion binding	148	0.00391	ENSP00000001008,ENSP00000078429,ENSP00000158166,ENSP00000166534,ENSP00000206423,ENSP00000215727,ENSP00000216484,ENSP00000217133,ENSP00000217244,ENSP00000222120,ENSP00000222330,ENSP00000225688,ENSP00000225792,ENSP00000229340,ENSP00000229812,ENSP00000229854,ENSP00000230640,ENSP00000233944,ENSP00000234179,ENSP00000242839,ENSP00000245451,ENSP00000247207,ENSP00000253083,ENSP00000254584,ENSP00000256078…	ABAT,ABCC10,ABCG8,ACADSB,ACOX3,ACTR1A,ADCY4,ADCY5,AGAP3,AK7,AKT3,ALDH1A3,ALOX15,APLP2,ARF3,ARFIP2,ATP11A,ATP13A1,ATP2C2,ATP7B,ATP8A2,AURKB,BAIAP2L2,BCS1L,BMP4,CAMKK1,CCBL2,CCDC80,CCT6A,CDC42BPG,CDK17,CDKL5,CHD1L,CLCN7,CLPB,COL25A1,CSNK2A1,CTPS1,CYTH3,DAK,DDX47,DDX5,DDX50,DDX58,DHX8,DNAH1,EFTUD2,EHD1,EHD2,EIF2B2,ENTPD1,ESYT1,FCHO2,FGFBP3,FKBP4,GCKR,GNA11,GNAL,GRK7,GSK3A,GSTM4,GUCY1A3,HCN1,HIP1R,HI…
GO.0019899	enzyme binding	81	0.0251	ENSP00000080059,ENSP00000200453,ENSP00000217372,ENSP00000219593,ENSP00000221665,ENSP00000221930,ENSP00000222330,ENSP00000229812,ENSP00000232424,ENSP00000233944,ENSP00000245960,ENSP00000247207,ENSP00000252455,ENSP00000252945,ENSP00000253699,ENSP00000254584,ENSP00000259075,ENSP00000259803,ENSP00000259808,ENSP00000260404,ENSP00000261017,ENSP00000261497,ENSP00000261574,ENSP00000265026,ENSP00000268251…	ABAT,ABI2,ADCY5,ADORA2A,ARFIP2,ARHGAP4,ARHGAP6,BICD2,CBX4,CDC25B,CDK5RAP1,CDK5RAP2,CDKL5,CLU,CTR9,CYP2E1,DBT,EHD1,ERRFI1,FGFR1OP,FIZ1,FOXO4,FRS2,FZD5,GCM1,GPI,GSK3A,GSTM4,HAUS7,HDAC7,HES1,HSPA2,IKBKG,ILK,IPO5,KCTD7,LCK,MAP3K13,MARVELD3,MID1,MYOZ2,NCOA6,NDRG1,NEDD4,NPC1L1,NRG1,PAK4,PAK6,PER1,PEX5,PIFO,PLA2R1,PPP1R15A,PRC1,PRKAG3,PRKCSH,PTPLA,PTPN2,RAB8B,RIPK1,RNF41,RNF8,RPS6,SCNM1,SKI,SMG7,SNX12,S…
GO.0036094	small molecule binding	141	0.0251	ENSP00000001008,ENSP00000078429,ENSP00000158166,ENSP00000166534,ENSP00000217133,ENSP00000217244,ENSP00000222120,ENSP00000222330,ENSP00000225688,ENSP00000225792,ENSP00000228347,ENSP00000229340,ENSP00000229812,ENSP00000229854,ENSP00000230640,ENSP00000233944,ENSP00000234179,ENSP00000242839,ENSP00000247207,ENSP00000252595,ENSP00000253108,ENSP00000253363,ENSP00000254584,ENSP00000254799,ENSP00000256078…	ABCC10,ABCG8,ACADSB,ACOX3,ACTR1A,ADCY4,ADCY5,AGAP3,AK7,AKT3,ALDH1A3,ARF3,ARFIP2,ATP11A,ATP13A1,ATP2C2,ATP7B,ATP8A2,AURKB,BCS1L,CAMKK1,CCT6A,CDA,CDC42BPG,CDK17,CDKL5,CHD1L,CLCN7,CLPB,CSNK2A1,CTPS1,DAK,DDX47,DDX5,DDX50,DDX58,DHX8,DNAH1,EFTUD2,EHD1,EHD2,EIF2B2,EIF3G,ENTPD1,FCHO2,FKBP4,GLYR1,GNA11,GNAL,GRK7,GRSF1,GSK3A,GUCY1A3,HCN1,HIPK2,HNRNPA3,HNRNPAB,HNRNPF,HSPA2,IGF2BP3,ILK,ITM2B,KIF18A,KRAS,LCK,…
GO.0097367	carbohydrate derivative binding	123	0.0251	ENSP00000001008,ENSP00000078429,ENSP00000158166,ENSP00000206423,ENSP00000215727,ENSP00000217133,ENSP00000217244,ENSP00000221930,ENSP00000222120,ENSP00000222330,ENSP00000225688,ENSP00000225792,ENSP00000228347,ENSP00000229340,ENSP00000229812,ENSP00000229854,ENSP00000230640,ENSP00000233944,ENSP00000234179,ENSP00000242839,ENSP00000245451,ENSP00000247207,ENSP00000254584,ENSP00000256078,ENSP00000256178…	ABCC10,ABCG8,ACTR1A,ADCY4,ADCY5,AGAP3,AK7,AKT3,APLP2,ARF3,ARFIP2,ATP11A,ATP13A1,ATP2C2,ATP7B,ATP8A2,AURKB,BCS1L,BMP4,CAMKK1,CCDC80,CCT6A,CDA,CDC42BPG,CDK17,CDKL5,CHD1L,CLCN7,CLPB,COL25A1,CSNK2A1,CTPS1,CTSS,DAK,DDX47,DDX5,DDX50,DDX58,DHX8,DNAH1,EFTUD2,EHD1,EHD2,EIF2B2,ENTPD1,FCHO2,FGFBP3,FKBP4,GCKR,GNA11,GNAL,GRK7,GSK3A,GUCY1A3,HCN1,HIPK2,HSPA2,ILK,ITM2B,KIF18A,KRAS,LAMA1,LCK,LPL,LYVE1,MAP3K13,MAP…
GO.0016740	transferase activity	112	0.0299	ENSP00000158166,ENSP00000169298,ENSP00000202625,ENSP00000206542,ENSP00000216484,ENSP00000217244,ENSP00000217372,ENSP00000222330,ENSP00000225276,ENSP00000228347,ENSP00000229812,ENSP00000233944,ENSP00000234179,ENSP00000250156,ENSP00000255108,ENSP00000259808,ENSP00000260404,ENSP00000260508,ENSP00000261211,ENSP00000261249,ENSP00000261326,ENSP00000262622,ENSP00000263253,ENSP00000263826,ENSP00000264122…	ABAT,ADPGK,AGPAT9,AK7,AKT3,ART5,ASMTL,AURKB,BHMT,CAMKK1,CBLB,CBX4,CCBL2,CCDC111,CDC42BPG,CDK17,CDK5RAP1,CDKL5,CHST13,CHST6,CHST7,CHST8,CHSY3,CSNK2A1,DAK,DBT,DPH2,EOGT,EP300,FBXL6,FGFR1OP,FTSJ3,GALNT13,GAMT,GGPS1,GPAT2,GRK7,GSK3A,GSTM4,GSTO1,GSTO2,HIPK2,HNMT,ILK,KCTD7,LCK,LCLAT1,LPCAT4,MAP3K13,MAP3K6,MCM3AP,MED7,MOCOS,MRM1,NADK,NADKD1,NEDD4,NSUN2,OSGEP,OXCT2,PAK4,PAK6,PARP10,PBK,PCMTD2,PCYT2,PIM2,…

## Sheet: Downregulated-MolecularFunction
Pathway ID	Pathway description	observed gene count	false discovery rate	matching proteins in your network (IDs)	matching proteins in your network (labels)
GO.0000166	nucleotide binding	100	0.0141	ENSP00000056217,ENSP00000216554,ENSP00000216639,ENSP00000217182,ENSP00000223366,ENSP00000225729,ENSP00000228284,ENSP00000230640,ENSP00000231790,ENSP00000238714,ENSP00000255448,ENSP00000258873,ENSP00000261233,ENSP00000261435,ENSP00000262269,ENSP00000262506,ENSP00000264169,ENSP00000264231,ENSP00000264663,ENSP00000264867,ENSP00000265022,ENSP00000268482,ENSP00000270112,ENSP00000270238,ENSP00000284719…	ABCA3,ACSBG1,ACSM5,ACTR8,ADRBK1,ADSS,AK2,ALPK2,ARHGEF5,ATP13A4,ATP2A3,CDC42BPA,CDKL1,CNP,COASY,CSNK2A2,CTBP1,DCLK1,DCLK2,DDX11,DDX41,DGKG,DGKH,DHX38,DIRAS2,DNAH11,DRG2,EEF1A2,EIF5,EPHA10,FASN,GBP2,GCK,GEM,GIMAP1,HIPK3,HNRPDL,HSPA14,HUNK,IARS2,IDH3A,IMPDH2,IRAK3,KCNT2,KDM1A,LMTK3,MAOA,MAP3K1,MAP3K15,MAP3K4,MAPK7,MKI67IP,MLH1,MOCS1,MYH14,N4BP2,NEK10,NEK11,NLRP14,NLRX1,NNT,OLA1,ORC4,PAPOLG,PDE2A,PDE…
GO.0001882	nucleoside binding	83	0.0141	ENSP00000056217,ENSP00000216554,ENSP00000216639,ENSP00000217182,ENSP00000223366,ENSP00000225729,ENSP00000230640,ENSP00000231790,ENSP00000238714,ENSP00000255448,ENSP00000258873,ENSP00000261233,ENSP00000261435,ENSP00000262269,ENSP00000262506,ENSP00000264169,ENSP00000265022,ENSP00000268482,ENSP00000270112,ENSP00000270238,ENSP00000284719,ENSP00000289153,ENSP00000292199,ENSP00000294725,ENSP00000297596…	ABCA3,ACSBG1,ACSM5,ACTR8,ADRBK1,ADSS,AK2,ALPK2,APAF1,ARHGEF5,ATP13A4,ATP2A3,CDC42BPA,CDKL1,COASY,CSNK2A2,DCLK1,DCLK2,DDX11,DDX41,DGKG,DGKH,DHX38,DIRAS2,DNAH11,DRG2,EEF1A2,EIF5,EPHA10,GBP2,GCK,GEM,GIMAP1,HIPK3,HSPA14,HUNK,IARS2,IRAK3,KCNT2,LMTK3,MAP3K1,MAP3K15,MAP3K4,MAPK7,MLH1,MOCS1,MYH14,N4BP2,NEK10,NEK11,NLRP14,NLRX1,OLA1,ORC4,PAPOLG,PDK2,PDPK1,PFKP,PIK3CB,PRKACA,PRKCE,RAB28,RAB8A,RNF112,RPS6KA…
GO.0003674	molecular_function	401	0.0141	ENSP00000026218,ENSP00000029410,ENSP00000162023,ENSP00000188790,ENSP00000206513,ENSP00000210060,ENSP00000216554,ENSP00000216639,ENSP00000216832,ENSP00000219833,ENSP00000220584,ENSP00000221086,ENSP00000221566,ENSP00000222115,ENSP00000223366,ENSP00000225388,ENSP00000225665,ENSP00000225729,ENSP00000225899,ENSP00000225916,ENSP00000227348,ENSP00000228606,ENSP00000229179,ENSP00000230053,ENSP00000230640…	ABCA3,ABHD4,ACBD3,ACP6,ACSBG1,ACSM5,ACTR8,ADAL,ADAMTS4,ADAP1,ADPRHL2,ADRB2,ADRBK1,ADSS,AHRR,AIM1,AK2,ALDOB,ALG9,ALPK2,ALPL,ALX1,ANK3,APC,ARHGEF33,ARL6IP4,ARPC2,ASAP3,ASB2,ASPH,ATCAY,ATP13A4,ATP2A3,B3GAT2,B4GALT7,BACH2,BBS7,BCAR3,BCL11B,BCL2L10,BTD,C12orf52,C1RL,C2CD4A,CACTIN,CASR,CBX6,CCDC48,CCDC79,CD109,CD2BP2,CD86,CDC42BPA,CDH1,CDH18,CDK5RAP3,CDKL1,CDT1,CEBPE,CENPV,CEP250,CERS2,CES2,CETN2,CHRNB…
GO.0005488	binding	343	0.0141	ENSP00000000412,ENSP00000029410,ENSP00000056217,ENSP00000162023,ENSP00000188790,ENSP00000206513,ENSP00000216554,ENSP00000216639,ENSP00000216832,ENSP00000217182,ENSP00000221566,ENSP00000223366,ENSP00000225388,ENSP00000225665,ENSP00000225729,ENSP00000227348,ENSP00000228606,ENSP00000230053,ENSP00000230640,ENSP00000230658,ENSP00000231461,ENSP00000231790,ENSP00000233575,ENSP00000235310,ENSP00000237275…	ABCA3,ACBD3,ACSBG1,ACSM5,ACTR8,ADAL,ADAMTS4,ADAP1,ADPRHL2,ADRBK1,ADSS,AGER,AHRR,AIM1,AK2,ALDOB,ALPK2,ALPL,ALX1,ANK3,APC,ARHGEF5,ARL6IP4,ASAP3,ASPH,ATCAY,ATP13A4,ATP2A3,B3GAT2,B4GALT7,BACH2,BBS7,BCL11B,BCL2L10,BMP1,C12orf52,C2CD4A,CA3,CACTIN,CBX6,CCDC48,CCDC79,CD109,CD2BP2,CDC42BPA,CDH1,CDH18,CDK5RAP3,CDKL1,CDT1,CEBPE,CEP250,CERS2,CETN2,CHRNB4,CLOCK,CLSTN2,CNDP1,CNN2,CNP,CNTLN,CNTN1,CNTROB,COASY,C…
GO.0032555	purine ribonucleotide binding	85	0.0141	ENSP00000056217,ENSP00000216554,ENSP00000216639,ENSP00000217182,ENSP00000223366,ENSP00000225729,ENSP00000230640,ENSP00000231790,ENSP00000238714,ENSP00000255448,ENSP00000258873,ENSP00000261233,ENSP00000261435,ENSP00000262269,ENSP00000262506,ENSP00000264169,ENSP00000264231,ENSP00000265022,ENSP00000268482,ENSP00000270112,ENSP00000270238,ENSP00000284719,ENSP00000289153,ENSP00000292199,ENSP00000294725…	ABCA3,ACSBG1,ACSM5,ACTR8,ADRBK1,ADSS,AK2,ALPK2,APAF1,ARHGEF5,ATP13A4,ATP2A3,CDC42BPA,CDKL1,COASY,CSNK2A2,DCLK1,DCLK2,DDX11,DDX41,DGKG,DGKH,DHX38,DIRAS2,DNAH11,DRG2,EEF1A2,EIF5,EPHA10,GBP2,GCK,GEM,GIMAP1,HIPK3,HSPA14,HUNK,IARS2,IRAK3,KCNT2,LMTK3,MAP3K1,MAP3K15,MAP3K4,MAPK7,MLH1,MOCS1,MYH14,N4BP2,NEK10,NEK11,NLRP14,NLRX1,OLA1,ORC4,PAPOLG,PDE2A,PDE3A,PDK2,PDPK1,PFKP,PIK3CB,POPDC2,PRKACA,PRKCE,RAB28,…
GO.0032559	adenyl ribonucleotide binding	72	0.0141	ENSP00000216639,ENSP00000223366,ENSP00000230640,ENSP00000231790,ENSP00000238714,ENSP00000255448,ENSP00000258873,ENSP00000261233,ENSP00000261435,ENSP00000262269,ENSP00000262506,ENSP00000264169,ENSP00000264231,ENSP00000265022,ENSP00000268482,ENSP00000270112,ENSP00000270238,ENSP00000284719,ENSP00000286063,ENSP00000289153,ENSP00000292199,ENSP00000294725,ENSP00000298139,ENSP00000299481,ENSP00000300305…	ABCA3,ACSBG1,ACSM5,ACTR8,ADRBK1,AK2,ALPK2,APAF1,ATP13A4,ATP2A3,CDC42BPA,CDKL1,COASY,CSNK2A2,DCLK1,DCLK2,DDX11,DDX41,DGKG,DGKH,DHX38,DNAH11,EPHA10,GCK,HIPK3,HSPA14,HUNK,IARS2,IRAK3,KCNT2,LMTK3,MAP3K1,MAP3K15,MAP3K4,MAPK7,MLH1,MYH14,N4BP2,NEK10,NEK11,NLRP14,NLRX1,OLA1,ORC4,PAPOLG,PDE11A,PDE2A,PDE3A,PDK2,PDPK1,PFKP,PIK3CB,POPDC2,PRKACA,PRKCE,RPS6KA4,RUNX1,RUNX2,SKIV2L2,SMG1,TCP1,TESK1,TOP2B,TTK,TUT1…
GO.0036094	small molecule binding	110	0.0141	ENSP00000056217,ENSP00000216554,ENSP00000216639,ENSP00000217182,ENSP00000223366,ENSP00000225729,ENSP00000228284,ENSP00000230640,ENSP00000231461,ENSP00000231790,ENSP00000238714,ENSP00000255448,ENSP00000257264,ENSP00000258873,ENSP00000261233,ENSP00000261435,ENSP00000262269,ENSP00000262506,ENSP00000264169,ENSP00000264231,ENSP00000264663,ENSP00000264867,ENSP00000265022,ENSP00000265846,ENSP00000268150…	ABCA3,ACSBG1,ACSM5,ACTR8,ADAP1,ADRBK1,ADSS,AK2,ALAS2,ALDOB,ALPK2,ARHGEF5,ATP13A4,ATP2A3,CDC42BPA,CDKL1,CNP,COASY,CSNK2A2,CTBP1,DCLK1,DCLK2,DDX11,DDX41,DGKG,DGKH,DHX38,DIRAS2,DNAH11,DRG2,EEF1A2,EIF5,EPHA10,FASN,GBP2,GCK,GEM,GIMAP1,HIPK3,HNRPDL,HSPA14,HUNK,IARS2,IDH3A,IMPDH2,IRAK3,KCNT2,KDM1A,LMTK3,MAOA,MAP3K1,MAP3K15,MAP3K4,MAPK7,MFGE8,MKI67IP,MLH1,MOCS1,MYH14,N4BP2,NEK10,NEK11,NLRP14,NLRX1,NNT,NR…
GO.0043168	anion binding	114	0.0141	ENSP00000056217,ENSP00000216554,ENSP00000216639,ENSP00000217182,ENSP00000223366,ENSP00000225729,ENSP00000230640,ENSP00000231461,ENSP00000231790,ENSP00000233575,ENSP00000238714,ENSP00000255448,ENSP00000258873,ENSP00000260950,ENSP00000261205,ENSP00000261233,ENSP00000261435,ENSP00000262269,ENSP00000262506,ENSP00000263033,ENSP00000264144,ENSP00000264169,ENSP00000264231,ENSP00000265022,ENSP00000265447…	ABCA3,ACBD3,ACSBG1,ACSM5,ACTR8,ADAP1,ADRBK1,ADSS,AK2,ALDOB,ALPK2,ANXA11,APAF1,ARHGEF5,ATP13A4,ATP2A3,C2CD4A,CDC42BPA,CDKL1,COASY,CSNK2A2,DCLK1,DCLK2,DDX11,DDX41,DGKG,DGKH,DHX38,DIRAS2,DNAH11,DRG2,EEA1,EEF1A2,EIF5,EPHA10,FASN,FERMT2,GBP2,GCK,GEM,GIMAP1,HIPK3,HSPA14,HUNK,IARS2,IRAK3,ITGAM,KCNT2,KDM1A,KRIT1,LAMC2,LMTK3,MAOA,MAP3K1,MAP3K15,MAP3K4,MAPK7,MFGE8,MLH1,MOCS1,MSTN,MTM1,MYH14,N4BP2,NEK10,NEK…
GO.0097367	carbohydrate derivative binding	96	0.0141	ENSP00000056217,ENSP00000216554,ENSP00000216639,ENSP00000217182,ENSP00000223366,ENSP00000225729,ENSP00000230640,ENSP00000231461,ENSP00000231790,ENSP00000238714,ENSP00000255448,ENSP00000258873,ENSP00000260950,ENSP00000261233,ENSP00000261435,ENSP00000261769,ENSP00000262269,ENSP00000262506,ENSP00000264144,ENSP00000264169,ENSP00000264231,ENSP00000265022,ENSP00000268150,ENSP00000268482,ENSP00000270112…	ABCA3,ACSBG1,ACSM5,ACTR8,ADRBK1,ADSS,AK2,ALPK2,APAF1,ARHGEF5,ATP13A4,ATP2A3,CDC42BPA,CDH1,CDKL1,COASY,CSNK2A2,DCLK1,DCLK2,DDX11,DDX41,DGKG,DGKH,DHX38,DIRAS2,DNAH11,DRG2,EEF1A2,EIF5,EPHA10,GBP2,GCK,GEM,GIMAP1,HIPK3,HSPA14,HUNK,IARS2,IRAK3,KCNT2,LAMC2,LMTK3,MAP3K1,MAP3K15,MAP3K4,MAPK7,MFGE8,MLH1,MOCS1,MSTN,MYH14,N4BP2,NEK10,NEK11,NLRP14,NLRX1,OLA1,ORC4,PAPOLG,PDE2A,PDE3A,PDK2,PDPK1,PFKP,PGLYRP2,PIK…
GO.1901363	heterocyclic compound binding	200	0.0141	ENSP00000056217,ENSP00000162023,ENSP00000206513,ENSP00000216554,ENSP00000216639,ENSP00000216832,ENSP00000217182,ENSP00000223366,ENSP00000225388,ENSP00000225665,ENSP00000225729,ENSP00000228515,ENSP00000228606,ENSP00000230640,ENSP00000230658,ENSP00000231790,ENSP00000238714,ENSP00000240328,ENSP00000244669,ENSP00000244769,ENSP00000248420,ENSP00000249504,ENSP00000250916,ENSP00000252543,ENSP00000255448…	ABCA3,ACSBG1,ACSM5,ACTR8,ADRBK1,ADSS,AHRR,AK2,ALAS2,ALPK2,ALX1,ANXA11,APOBEC2,ARHGEF5,ARL6IP4,ATP13A4,ATP2A3,ATXN1,BACH2,BARD1,BCL11B,CACTIN,CBX6,CCDC79,CDC42BPA,CDKL1,CDT1,CEBPE,CERS2,CLOCK,CNP,COASY,CPSF2,CR2,CSNK2A2,CSRNP2,CTBP1,CTC1,CYP27A1,CYP27B1,CYP46A1,DCLK1,DCLK2,DDX11,DEK,DGKG,DGKH,DHX38,DIRAS2,DMRTA1,DNAH11,DNAJC21,DRG2,EEF1A2,EIF2C1,EIF5,EPHA10,FLYWCH2,FNDC3B,FOSL1,FOXL1,FUBP3,GADD45A…
GO.0032550	purine ribonucleoside binding	82	0.0143	ENSP00000056217,ENSP00000216554,ENSP00000216639,ENSP00000217182,ENSP00000223366,ENSP00000225729,ENSP00000230640,ENSP00000231790,ENSP00000238714,ENSP00000255448,ENSP00000258873,ENSP00000261233,ENSP00000261435,ENSP00000262269,ENSP00000262506,ENSP00000264169,ENSP00000265022,ENSP00000268482,ENSP00000270112,ENSP00000270238,ENSP00000284719,ENSP00000289153,ENSP00000292199,ENSP00000294725,ENSP00000297596…	ABCA3,ACSBG1,ACSM5,ACTR8,ADRBK1,ADSS,AK2,ALPK2,APAF1,ARHGEF5,ATP13A4,ATP2A3,CDC42BPA,CDKL1,COASY,CSNK2A2,DCLK1,DCLK2,DDX11,DDX41,DGKG,DGKH,DHX38,DIRAS2,DNAH11,DRG2,EEF1A2,EIF5,EPHA10,GBP2,GCK,GEM,GIMAP1,HIPK3,HSPA14,HUNK,IARS2,IRAK3,KCNT2,LMTK3,MAP3K1,MAP3K15,MAP3K4,MAPK7,MLH1,MOCS1,MYH14,N4BP2,NEK10,NEK11,NLRP14,NLRX1,OLA1,ORC4,PAPOLG,PDK2,PDPK1,PFKP,PIK3CB,PRKACA,PRKCE,RAB28,RAB8A,RNF112,RPS6KA…
GO.0035639	purine ribonucleoside triphosphate binding	82	0.0143	ENSP00000056217,ENSP00000216554,ENSP00000216639,ENSP00000217182,ENSP00000223366,ENSP00000225729,ENSP00000230640,ENSP00000231790,ENSP00000238714,ENSP00000255448,ENSP00000258873,ENSP00000261233,ENSP00000261435,ENSP00000262269,ENSP00000262506,ENSP00000264169,ENSP00000265022,ENSP00000268482,ENSP00000270112,ENSP00000270238,ENSP00000284719,ENSP00000289153,ENSP00000292199,ENSP00000294725,ENSP00000297596…	ABCA3,ACSBG1,ACSM5,ACTR8,ADRBK1,ADSS,AK2,ALPK2,APAF1,ARHGEF5,ATP13A4,ATP2A3,CDC42BPA,CDKL1,COASY,CSNK2A2,DCLK1,DCLK2,DDX11,DDX41,DGKG,DGKH,DHX38,DIRAS2,DNAH11,DRG2,EEF1A2,EIF5,EPHA10,GBP2,GCK,GEM,GIMAP1,HIPK3,HSPA14,HUNK,IARS2,IRAK3,KCNT2,LMTK3,MAP3K1,MAP3K15,MAP3K4,MAPK7,MLH1,MOCS1,MYH14,N4BP2,NEK10,NEK11,NLRP14,NLRX1,OLA1,ORC4,PAPOLG,PDK2,PDPK1,PFKP,PIK3CB,PRKACA,PRKCE,RAB28,RAB8A,RNF112,RPS6KA…
GO.0043167	ion binding	218	0.0143	ENSP00000000442,ENSP00000029410,ENSP00000056217,ENSP00000216554,ENSP00000216639,ENSP00000217182,ENSP00000223366,ENSP00000225729,ENSP00000228606,ENSP00000229304,ENSP00000230053,ENSP00000230640,ENSP00000230658,ENSP00000231461,ENSP00000231790,ENSP00000233575,ENSP00000237275,ENSP00000238714,ENSP00000239449,ENSP00000244669,ENSP00000247668,ENSP00000250916,ENSP00000250937,ENSP00000253303,ENSP00000255448…	ABCA3,ACBD3,ACSBG1,ACSM5,ACTR8,ADAL,ADAMTS4,ADAP1,ADPRHL2,ADRB2,ADRBK1,ADSS,AGBL5,AK2,ALDOB,ALPK2,ALPL,ANXA11,APAF1,APOBEC1,APOBEC2,ARHGEF5,ASAP3,ASPH,ASXL2,ATP13A4,ATP2A3,B3GAT2,B4GALT7,BARD1,BCL11B,BMP1,C2CD4A,CA3,CCDC48,CDC42BPA,CDH1,CDH18,CDKL1,CETN2,CHRNB4,CLSTN2,CNDP1,COASY,COL5A2,COX11,CSNK2A2,CYP27A1,CYP27B1,CYP46A1,DCLK1,DCLK2,DDX11,DDX41,DGKG,DGKH,DHH,DHX38,DIRAS2,DMRTA1,DNAH11,DNAJC21,…
GO.0097159	organic cyclic compound binding	200	0.019	ENSP00000056217,ENSP00000162023,ENSP00000206513,ENSP00000216554,ENSP00000216639,ENSP00000216832,ENSP00000217182,ENSP00000223366,ENSP00000225388,ENSP00000225665,ENSP00000225729,ENSP00000228515,ENSP00000228606,ENSP00000230640,ENSP00000230658,ENSP00000231790,ENSP00000238714,ENSP00000240328,ENSP00000244669,ENSP00000244769,ENSP00000248420,ENSP00000249504,ENSP00000250916,ENSP00000252543,ENSP00000255448…	ABCA3,ACSBG1,ACSM5,ACTR8,ADRBK1,ADSS,AHRR,AK2,ALAS2,ALPK2,ALX1,ANXA11,APOBEC2,ARHGEF5,ARL6IP4,ATP13A4,ATP2A3,ATXN1,BACH2,BARD1,BCL11B,CACTIN,CBX6,CCDC79,CDC42BPA,CDKL1,CDT1,CEBPE,CERS2,CLOCK,CNP,COASY,CPSF2,CR2,CSNK2A2,CSRNP2,CTBP1,CTC1,CYP27A1,CYP27B1,CYP46A1,DCLK1,DCLK2,DDX11,DEK,DGKG,DGKH,DHX38,DIRAS2,DMRTA1,DNAH11,DNAJC21,DRG2,EEF1A2,EIF2C1,EIF5,EPHA10,FLYWCH2,FNDC3B,FOSL1,FOXL1,FUBP3,GADD45A…
GO.0005524	ATP binding	68	0.0267	ENSP00000216639,ENSP00000223366,ENSP00000230640,ENSP00000231790,ENSP00000238714,ENSP00000255448,ENSP00000258873,ENSP00000261233,ENSP00000261435,ENSP00000262269,ENSP00000262506,ENSP00000264169,ENSP00000265022,ENSP00000268482,ENSP00000270112,ENSP00000270238,ENSP00000284719,ENSP00000289153,ENSP00000292199,ENSP00000294725,ENSP00000298139,ENSP00000299481,ENSP00000300305,ENSP00000301732,ENSP00000303279…	ABCA3,ACSBG1,ACSM5,ACTR8,ADRBK1,AK2,ALPK2,APAF1,ATP13A4,ATP2A3,CDC42BPA,CDKL1,COASY,CSNK2A2,DCLK1,DCLK2,DDX11,DDX41,DGKG,DGKH,DHX38,DNAH11,EPHA10,GCK,HIPK3,HSPA14,HUNK,IARS2,IRAK3,KCNT2,LMTK3,MAP3K1,MAP3K15,MAP3K4,MAPK7,MLH1,MYH14,N4BP2,NEK10,NEK11,NLRP14,NLRX1,OLA1,ORC4,PAPOLG,PDK2,PDPK1,PFKP,PIK3CB,PRKACA,PRKCE,RPS6KA4,RUNX1,RUNX2,SKIV2L2,SMG1,TCP1,TESK1,TOP2B,TTK,TUT1,TWF1,UBE2J1,UBE2O,UCK2,VR…
GO.0043169	cation binding	158	0.0276	ENSP00000000442,ENSP00000029410,ENSP00000228606,ENSP00000229304,ENSP00000230053,ENSP00000230658,ENSP00000237275,ENSP00000238714,ENSP00000239449,ENSP00000244669,ENSP00000247668,ENSP00000250916,ENSP00000250937,ENSP00000253303,ENSP00000256398,ENSP00000258415,ENSP00000260229,ENSP00000260947,ENSP00000261205,ENSP00000261233,ENSP00000261751,ENSP00000261769,ENSP00000261835,ENSP00000262366,ENSP00000262407…	ACSM5,ADAL,ADAMTS4,ADAP1,ADPRHL2,ADRB2,ADSS,AGBL5,ALAS2,ALDOB,ALPL,ANXA11,APOBEC1,APOBEC2,ASAP3,ASPH,ASXL2,ATP13A4,ATP2A3,B3GAT2,B4GALT7,BARD1,BCL11B,BMP1,C2CD4A,CA3,CCDC48,CDC42BPA,CDH1,CDH18,CETN2,CHRNB4,CLSTN2,CNDP1,COL5A2,COX11,CYP27A1,CYP27B1,CYP46A1,DDX11,DDX41,DGKG,DGKH,DHH,DMRTA1,DNAJC21,DOHH,EEA1,EFCAB4A,ELP3,EMR1,ENOSF1,ESRRA,FASN,GEM,GLIS2,GZF1,IDH3A,IMPDH2,INPP5B,IRAK3,ISCA1,ISL1,ITGA…
GO.0046872	metal ion binding	154	0.0466	ENSP00000000442,ENSP00000029410,ENSP00000228606,ENSP00000229304,ENSP00000230053,ENSP00000230658,ENSP00000237275,ENSP00000238714,ENSP00000239449,ENSP00000244669,ENSP00000247668,ENSP00000250916,ENSP00000250937,ENSP00000253303,ENSP00000256398,ENSP00000258415,ENSP00000260229,ENSP00000260947,ENSP00000261205,ENSP00000261233,ENSP00000261769,ENSP00000261835,ENSP00000262366,ENSP00000262407,ENSP00000263033…	ACSM5,ADAL,ADAMTS4,ADAP1,ADPRHL2,ADSS,AGBL5,ALPL,ANXA11,APOBEC1,APOBEC2,ASAP3,ASPH,ASXL2,ATP13A4,ATP2A3,B3GAT2,B4GALT7,BARD1,BCL11B,BMP1,C2CD4A,CA3,CCDC48,CDC42BPA,CDH1,CDH18,CETN2,CLSTN2,CNDP1,COL5A2,COX11,CYP27A1,CYP27B1,CYP46A1,DDX11,DDX41,DGKG,DGKH,DHH,DMRTA1,DNAJC21,DOHH,EEA1,EFCAB4A,ELP3,EMR1,ENOSF1,ESRRA,FASN,GEM,GLIS2,GZF1,IDH3A,IMPDH2,INPP5B,IRAK3,ISCA1,ISL1,ITGA2B,ITGAM,ITGB7,KLF11,KLF1…

## Sheet: Upregulated-BiologicalProcess
Pathway ID	Pathway description	observed gene count	false discovery rate	matching proteins in your network (IDs)	matching proteins in your network (labels)
GO.0001932	regulation of protein phosphorylation	85	0.000155	ENSP00000158166,ENSP00000217372,ENSP00000218032,ENSP00000221665,ENSP00000221930,ENSP00000222330,ENSP00000222462,ENSP00000228307,ENSP00000229812,ENSP00000232424,ENSP00000233202,ENSP00000234961,ENSP00000245451,ENSP00000245960,ENSP00000247207,ENSP00000252595,ENSP00000256078,ENSP00000259607,ENSP00000259808,ENSP00000260404,ENSP00000263253,ENSP00000263574,ENSP00000263577,ENSP00000264634,ENSP00000264694…	ADCY4,ADCY5,ADCYAP1,ADRA1A,ALOX15,APLP2,BMP4,CAMKK1,CAV3,CCL21,CCNB3,CDC25B,CDH2,CDK5RAP1,CDON,CLSPN,CLU,DRD2,DUSP6,EDN1,EP300,EPB49,FAM59A,FBLN1,FBXO31,FGFR1OP,FIZ1,FNIP1,FZD5,GDF7,GDF9,GRM1,GSK3A,HAX1,HES1,HIPK2,HSPA2,IFNE,IGF1,ILK,INHBB,IQGAP3,ITGA5,KCTD7,KIRREL,KRAS,LCK,MAP3K13,MAP3K6,MARVELD3,MID1,NRG1,NTF3,OPRD1,P2RX7,PAK4,PAK6,PBK,PDCD4,PDGFD,PER1,PXN,REN,RIPK1,RNF41,SBK2,SH3BP5L,SLC11A1,S…
GO.0001934	positive regulation of protein phosphorylation	62	0.000547	ENSP00000158166,ENSP00000200453,ENSP00000221665,ENSP00000221930,ENSP00000222330,ENSP00000222462,ENSP00000228307,ENSP00000232424,ENSP00000233202,ENSP00000234961,ENSP00000245960,ENSP00000247207,ENSP00000252595,ENSP00000256078,ENSP00000259607,ENSP00000259808,ENSP00000260404,ENSP00000263253,ENSP00000263577,ENSP00000264634,ENSP00000265026,ENSP00000269141,ENSP00000269209,ENSP00000272224,ENSP00000282753…	ADCY4,ADCY5,ADCYAP1,ADRA1A,ALOX15,CAMKK1,CCL21,CDC25B,CDH2,CDK5R2,CDON,CLSPN,CLU,DRD2,EDN1,EP300,FAM59A,FIZ1,FNIP1,FZD5,GDF7,GDF9,GRM1,GSK3A,HAX1,HES1,HIPK2,HSPA2,IFNE,IGF1,ILK,INHBB,IQGAP3,ITGA5,KRAS,LCK,MAP3K13,MAP3K6,MID1,NRG1,NTF3,OPRD1,P2RX7,PAK4,PAK6,PPP1R15A,PRKAA1,PXN,RIPK1,SBK2,SLC11A1,SLC27A1,TERF2IP,TGFB1,TGFB2,TGFBR2,THBS4,WNT16,WNT5A,WNT7A,ZAK,ZP3
GO.0042325	regulation of phosphorylation	86	0.000547	ENSP00000158166,ENSP00000217372,ENSP00000218032,ENSP00000221665,ENSP00000221930,ENSP00000222330,ENSP00000222462,ENSP00000228307,ENSP00000229812,ENSP00000232424,ENSP00000233202,ENSP00000234961,ENSP00000245451,ENSP00000245960,ENSP00000247207,ENSP00000252595,ENSP00000256078,ENSP00000259607,ENSP00000259808,ENSP00000260404,ENSP00000263253,ENSP00000263574,ENSP00000263577,ENSP00000264634,ENSP00000264694…	ADCY4,ADCY5,ADCYAP1,ADRA1A,ALOX15,APLP2,BMP4,CAMKK1,CAV3,CCL21,CCNB3,CDC25B,CDH2,CDK5RAP1,CDON,CLSPN,CLU,DRD2,DUSP6,EDN1,EP300,EPB49,FAM59A,FBLN1,FBXO31,FGFR1OP,FIZ1,FNIP1,FZD5,GCKR,GDF7,GDF9,GRM1,GSK3A,HAX1,HES1,HIPK2,HSPA2,IFNE,IGF1,INHBB,IQGAP3,ITGA5,KCTD7,KIRREL,KRAS,LCK,MAP3K13,MAP3K6,MARVELD3,MID1,NRG1,NTF3,OPRD1,P2RX7,PAK4,PAK6,PBK,PDCD4,PDGFD,PER1,PIFO,PXN,REN,RIPK1,RNF41,SBK2,SH3BP5L,SLC…
GO.0044093	positive regulation of molecular function	106	0.000547	ENSP00000158166,ENSP00000200453,ENSP00000221930,ENSP00000222330,ENSP00000222792,ENSP00000224073,ENSP00000228307,ENSP00000232424,ENSP00000233202,ENSP00000234961,ENSP00000245960,ENSP00000247207,ENSP00000250617,ENSP00000252595,ENSP00000259607,ENSP00000259808,ENSP00000260404,ENSP00000264400,ENSP00000264634,ENSP00000265026,ENSP00000265036,ENSP00000265354,ENSP00000265728,ENSP00000265965,ENSP00000266126…	ADC,ADCY4,ADCY5,ADCYAP1,ADORA2A,ADRA1A,AGAP3,ARHGAP27,ARHGAP30,ARHGAP4,ARHGAP6,ARHGEF25,ARHGEF3,ARHGEF40,ARHGEF6,ARID5B,CAMKK1,CCL21,CDC14B,CDC25B,CDK5R2,CDKL5,CHN2,CHP2,CLIC2,CLSPN,CLU,CTSS,CUL1,CYTH3,DBF4,DDX58,DENND4B,DENND6B,DEPDC1B,DOCK11,DRD2,EBAG9,EDF1,EDN1,EIF2B2,ERRFI1,FBLN1,FNIP1,FZD5,GRM1,GSK3A,GSTO1,GTF2F1,HES1,HIPK2,HSPA2,IGF1,ILK,IQGAP3,KCTD7,LCK,MAP3K13,MAP3K6,MBTPS2,MCF2L2,NEDD4L,…
GO.0042327	positive regulation of phosphorylation	62	0.00164	ENSP00000158166,ENSP00000200453,ENSP00000221665,ENSP00000221930,ENSP00000222330,ENSP00000222462,ENSP00000228307,ENSP00000232424,ENSP00000233202,ENSP00000234961,ENSP00000245960,ENSP00000247207,ENSP00000252595,ENSP00000256078,ENSP00000259607,ENSP00000259808,ENSP00000260404,ENSP00000263253,ENSP00000263577,ENSP00000264634,ENSP00000265026,ENSP00000269141,ENSP00000269209,ENSP00000272224,ENSP00000282753…	ADCY4,ADCY5,ADCYAP1,ADRA1A,ALOX15,CAMKK1,CCL21,CDC25B,CDH2,CDK5R2,CDON,CLSPN,CLU,DRD2,EDN1,EP300,FAM59A,FIZ1,FNIP1,FZD5,GDF7,GDF9,GRM1,GSK3A,HAX1,HES1,HIPK2,HSPA2,IFNE,IGF1,INHBB,IQGAP3,ITGA5,KRAS,LCK,MAP3K13,MAP3K6,MID1,NRG1,NTF3,OPRD1,P2RX7,PAK4,PAK6,PIFO,PPP1R15A,PRKAA1,PXN,RIPK1,SBK2,SLC11A1,SLC27A1,TERF2IP,TGFB1,TGFB2,TGFBR2,THBS4,WNT16,WNT5A,WNT7A,ZAK,ZP3
GO.0044260	cellular macromolecule metabolic process	311	0.00164	ENSP00000001008,ENSP00000080059,ENSP00000158166,ENSP00000169298,ENSP00000180173,ENSP00000202625,ENSP00000215742,ENSP00000215904,ENSP00000216027,ENSP00000216185,ENSP00000217133,ENSP00000217244,ENSP00000217372,ENSP00000217961,ENSP00000221455,ENSP00000221665,ENSP00000221930,ENSP00000222120,ENSP00000222219,ENSP00000222330,ENSP00000223210,ENSP00000224073,ENSP00000225276,ENSP00000225792,ENSP00000228307…	ABI2,ACTR5,ADAMTS13,AKT3,ALKBH4,ANAPC16,ARHGEF6,ARID3A,ARID5B,ARSG,ART5,ASB10,ASCC2,ATOH7,AURKB,BAHD1,BAZ2B,BHLHA9,BHMT,BMP4,BNC1,BSX,CAMKK1,CAV3,CBLB,CBX4,CCDC111,CCDC155,CCNE2,CCT6A,CDC14B,CDC25B,CDC42BPG,CDC45,CDK17,CDK5RAP1,CDKL5,CHD1L,CHERP,CHST13,CHST7,CHST8,CHSY3,CLASRP,CLSPN,CLU,COX7C,CSNK2A1,CTR9,CTSF,CTSS,DBF4,DCAF11,DDX47,DDX5,DDX50,DGCR14,DHX8,DNAJB4,DNASE2,DPH2,DRD2,DUSP6,DUT,EDF1,EF…
GO.0048518	positive regulation of biological process	244	0.00164	ENSP00000080059,ENSP00000158166,ENSP00000200453,ENSP00000206423,ENSP00000215904,ENSP00000217244,ENSP00000217961,ENSP00000221665,ENSP00000221930,ENSP00000222120,ENSP00000222330,ENSP00000222462,ENSP00000222792,ENSP00000224073,ENSP00000225792,ENSP00000227163,ENSP00000228307,ENSP00000228347,ENSP00000229268,ENSP00000232424,ENSP00000233202,ENSP00000233954,ENSP00000234961,ENSP00000239223,ENSP00000241274…	ABAT,ABI2,ADC,ADCY4,ADCY5,ADCYAP1,ADORA2A,ADRA1A,AGAP3,AHI1,AKR1B1,ALDH1A3,ANKAR,ARHGAP27,ARHGAP30,ARHGAP4,ARHGAP6,ARHGEF25,ARHGEF3,ARHGEF40,ARHGEF6,ARID3A,ARID5B,ATP8A2,AURKB,BAIAP2L2,BMP4,BOC,BSX,CACNB3,CAMKK1,CAV3,CBLB,CCDC80,CCL21,CCM2L,CD180,CDC14B,CDC45,CDK5R2,CDK5RAP2,CDKL5,CDKN2AIP,CHERP,CHN2,CHP2,CLSPN,CLU,CSNK2A1,CTNNA2,CTR9,CTSS,CUL1,DBC1,DBF4,DDX5,DDX58,DENND4B,DENND6B,DEPDC1B,DOCK11,…
GO.0048729	tissue morphogenesis	48	0.00164	ENSP00000221930,ENSP00000222145,ENSP00000222462,ENSP00000227163,ENSP00000228307,ENSP00000232424,ENSP00000254799,ENSP00000256078,ENSP00000258411,ENSP00000259803,ENSP00000261483,ENSP00000262461,ENSP00000262659,ENSP00000263577,ENSP00000264634,ENSP00000265354,ENSP00000265602,ENSP00000267119,ENSP00000272224,ENSP00000279386,ENSP00000285018,ENSP00000293379,ENSP00000295694,ENSP00000299293,ENSP00000299421…	AHI1,ALDH1A3,ATP8A2,CA9,CCM2L,CDON,EDN1,FGF8,FRS2,FZD5,GCM1,GDF7,GRSF1,HCN1,HES1,HIPK2,HOXD13,IGF1,ILK,ITGA5,KRAS,KRT71,LAMA1,MAN2A1,NRG1,PAX2,PXN,RASIP1,RBPJ,RS1,S1PR1,SEMA5A,SKI,SLC12A2,SPI1,SRF,TBX6,TCAP,TGFB1,TGFB2,TGFBR2,TMEM79,TNNI3,TOR1A,WNT10A,WNT16,WNT5A,WNT7A
GO.0009628	response to abiotic stimulus	75	0.00178	ENSP00000001008,ENSP00000078429,ENSP00000216185,ENSP00000217961,ENSP00000218032,ENSP00000221930,ENSP00000233946,ENSP00000234961,ENSP00000239223,ENSP00000243903,ENSP00000245414,ENSP00000245451,ENSP00000252595,ENSP00000256078,ENSP00000256996,ENSP00000260116,ENSP00000261881,ENSP00000262461,ENSP00000263253,ENSP00000264883,ENSP00000265113,ENSP00000265354,ENSP00000266126,ENSP00000268251,ENSP00000275780…	ABAT,ACTR5,AKR1B1,ASIC3,ATP8A2,AURKB,BMP4,CA9,CAV3,CCDC111,CLCN7,CLPB,CTSS,CYP2R1,DDB2,DNAH1,DNAJB4,DRD2,DUSP1,EDN1,EIF2B2,EP300,ERRFI1,FKBP4,GNA11,GRM1,HIPK2,HNMT,HP1BP3,IGF1,IL1R1,INHBB,IRF1,KRAS,LCK,LDHA,MAG,MARVELD3,MYOF,NDRG1,NEDD4,NEDD4L,NEUROD2,NUP54,OPRD1,P2RX7,PBK,PER1,PITPNM1,PNKP,RAD54L,RBPJ,RFWD3,RNF8,RS1,RUVBL2,SDF4,SLC12A2,SLC1A3,SLC27A1,SRF,STRBP,STS,TACC3,TCAP,TGFB1,TGFB2,TGFBR2,T…
GO.0051149	positive regulation of muscle cell differentiation	15	0.00178	ENSP00000221930,ENSP00000245451,ENSP00000263253,ENSP00000263277,ENSP00000263577,ENSP00000269141,ENSP00000299421,ENSP00000304669,ENSP00000320516,ENSP00000341940,ENSP00000345206,ENSP00000347546,ENSP00000349275,ENSP00000368683,ENSP00000418191	BMP4,BOC,CAV3,CDH2,CDON,CTNNA1,CTNNA2,EDN1,EHD1,EHD2,EP300,ILK,NRG1,RBPJ,TGFB1
GO.0071704	organic substance metabolic process	384	0.00178	ENSP00000001008,ENSP00000061240,ENSP00000080059,ENSP00000158166,ENSP00000169298,ENSP00000202625,ENSP00000215742,ENSP00000215904,ENSP00000216027,ENSP00000216185,ENSP00000217133,ENSP00000217244,ENSP00000217372,ENSP00000217961,ENSP00000221455,ENSP00000221665,ENSP00000221930,ENSP00000222120,ENSP00000222219,ENSP00000222330,ENSP00000223210,ENSP00000224073,ENSP00000225792,ENSP00000228027,ENSP00000228307…	AASS,ABI2,ACADSB,ACOX3,ACTR5,ADAM19,ADAMTS10,ADAMTS18,ADC,ADCY4,ADCY5,ADORA2A,ADPGK,AGPAT9,AK7,AKT3,ALKBH4,ALOX15,AMPD1,ANAPC16,APLP2,ARF3,ARHGEF6,ARID3A,ARID5B,ARSG,ART5,ASB10,ASCC2,ATOH7,AURKB,BAHD1,BAZ2B,BHLHA9,BHMT,BMP4,BNC1,BSX,CACNA1A,CAMKK1,CAV3,CBLB,CBX4,CCDC111,CCDC155,CCNE2,CCT6A,CDA,CDC14B,CDC25B,CDC42BPG,CDC45,CDK17,CDK5RAP1,CDKL5,CHD1L,CHERP,CHST6,CHST7,CHSY3,CLASRP,CLSPN,CLU,COL25A1…
GO.0031401	positive regulation of protein modification process	71	0.00209	ENSP00000158166,ENSP00000200453,ENSP00000221665,ENSP00000221930,ENSP00000222330,ENSP00000222462,ENSP00000228307,ENSP00000232424,ENSP00000233202,ENSP00000234961,ENSP00000245960,ENSP00000247207,ENSP00000252595,ENSP00000254661,ENSP00000254806,ENSP00000256078,ENSP00000259607,ENSP00000259808,ENSP00000260404,ENSP00000263253,ENSP00000263577,ENSP00000264634,ENSP00000265026,ENSP00000269141,ENSP00000269209…	ADCY4,ADCY5,ADCYAP1,ADRA1A,ALOX15,CAMKK1,CAV3,CCL21,CDC14B,CDC25B,CDH2,CDK5R2,CDON,CHP2,CLSPN,CLU,CTR9,CUL1,DRD2,EDN1,EP300,FAM59A,FIZ1,FNIP1,FZD5,GCFC1,GDF7,GDF9,GRM1,GSK3A,HAX1,HES1,HIPK2,HSPA2,IFNE,IGF1,ILK,INHBB,IQGAP3,ITGA5,KRAS,LCK,MAP3K13,MAP3K6,MID1,NRG1,NTF3,OPRD1,P2RX7,PAK4,PAK6,PPP1R15A,PRKAA1,PXN,RAMP1,RIPK1,RUVBL2,SBK2,SLC11A1,SLC27A1,TERF2IP,TGFB1,TGFB2,TGFBR2,THBS4,WBP2,WNT16,WNT5A…
GO.0043170	macromolecule metabolic process	331	0.0021	ENSP00000001008,ENSP00000061240,ENSP00000080059,ENSP00000158166,ENSP00000169298,ENSP00000180173,ENSP00000202625,ENSP00000215742,ENSP00000215904,ENSP00000216027,ENSP00000216185,ENSP00000217133,ENSP00000217244,ENSP00000217372,ENSP00000217961,ENSP00000221455,ENSP00000221665,ENSP00000221930,ENSP00000222120,ENSP00000222219,ENSP00000222330,ENSP00000223210,ENSP00000224073,ENSP00000225792,ENSP00000228307…	ABI2,ACTR5,ADAM19,ADAMTS10,ADAMTS18,AKT3,ALKBH4,ANAPC16,ARHGEF6,ARID3A,ARID5B,ARSG,ART5,ASB10,ASCC2,ATOH7,AURKB,BAHD1,BAZ2B,BHLHA9,BHMT,BMP4,BNC1,BSX,CAMKK1,CAV3,CBLB,CBX4,CCDC111,CCDC155,CCNE2,CCT6A,CDC14B,CDC25B,CDC42BPG,CDC45,CDK17,CDK5RAP1,CDKL5,CHD1L,CHERP,CHST13,CHST6,CHST7,CHST8,CHSY3,CLASRP,CLSPN,CLU,COL25A1,COL6A1,COX7C,CSNK2A1,CTR9,CTSF,CTSS,DBF4,DCAF11,DDX47,DDX5,DDX50,DGCR14,DHX8,DNAJ…
GO.0043408	regulation of MAPK cascade	48	0.0021	ENSP00000221930,ENSP00000222462,ENSP00000228307,ENSP00000229812,ENSP00000259607,ENSP00000259808,ENSP00000260404,ENSP00000263577,ENSP00000264634,ENSP00000265026,ENSP00000269141,ENSP00000269209,ENSP00000272190,ENSP00000272224,ENSP00000279488,ENSP00000280154,ENSP00000282753,ENSP00000285018,ENSP00000293761,ENSP00000295228,ENSP00000296875,ENSP00000299421,ENSP00000299952,ENSP00000301905,ENSP00000310193…	ADCYAP1,ADRA1A,ALOX15,CAV3,CCL21,CDH2,CDON,DRD2,DUSP6,EDN1,ERRFI1,FAM59A,FBLN1,FZD5,GDF7,GDF9,GRM1,HIPK2,IKBKG,ILK,INHBB,IQGAP3,MAP3K13,MAP3K6,MARVELD3,MID1,NTF3,P2RX7,PAK4,PAK6,PBK,PDCD4,PER1,PRKAA1,PTPN2,PXN,REN,RIPK1,RNF41,SBK2,STK38,TBC1D10C,TGFB1,TGFB2,WNT16,WNT5A,WNT7A,ZAK
GO.0051147	regulation of muscle cell differentiation	20	0.0021	ENSP00000222330,ENSP00000245451,ENSP00000263253,ENSP00000263277,ENSP00000263577,ENSP00000265354,ENSP00000269141,ENSP00000284669,ENSP00000299421,ENSP00000304669,ENSP00000312675,ENSP00000320516,ENSP00000341940,ENSP00000345206,ENSP00000347546,ENSP00000349275,ENSP00000362778,ENSP00000363377,ENSP00000368683,ENSP00000418191	BMP4,BOC,CAV3,CDH2,CDON,CTNNA1,CTNNA2,EDN1,EHD1,EHD2,EP300,FOXO4,GSK3A,ILK,KBTBD10,NRG1,PI16,RBPJ,SRF,TRIM72
GO.0031399	regulation of protein modification process	96	0.00242	ENSP00000158166,ENSP00000217372,ENSP00000218032,ENSP00000221665,ENSP00000221930,ENSP00000222330,ENSP00000222462,ENSP00000227163,ENSP00000228307,ENSP00000229812,ENSP00000232424,ENSP00000233202,ENSP00000234961,ENSP00000245451,ENSP00000245960,ENSP00000247207,ENSP00000252595,ENSP00000254661,ENSP00000254806,ENSP00000256078,ENSP00000259607,ENSP00000259808,ENSP00000260404,ENSP00000263574,ENSP00000263577…	ADCY4,ADCY5,ADCYAP1,ADRA1A,ALOX15,APLP2,BMP4,CAMKK1,CAV3,CCL21,CCNB3,CDC14B,CDC25B,CDH2,CDK5RAP1,CDON,CHP2,CLSPN,CLU,CTR9,CUL1,DRD2,DUSP6,EDN1,EPB49,FAM59A,FBLN1,FBXO31,FGFR1OP,FIZ1,FNIP1,FZD5,GCFC1,GDF7,GDF9,GRM1,GSK3A,HAX1,HES1,HIPK2,HSPA2,IFNE,IGF1,ILK,INHBB,IQGAP3,ITGA5,KCTD7,KIRREL,KRAS,LCK,MAP3K13,MAP3K6,MARVELD3,MID1,NRG1,NTF3,OPRD1,P2RX7,PAK4,PAK6,PARP10,PAX2,PBK,PDCD4,PDGFD,PER1,PXN,RAMP…
GO.0044238	primary metabolic process	374	0.00242	ENSP00000001008,ENSP00000061240,ENSP00000080059,ENSP00000158166,ENSP00000169298,ENSP00000202625,ENSP00000215742,ENSP00000215904,ENSP00000216027,ENSP00000216185,ENSP00000217133,ENSP00000217244,ENSP00000217372,ENSP00000217961,ENSP00000221455,ENSP00000221665,ENSP00000221930,ENSP00000222120,ENSP00000222219,ENSP00000222330,ENSP00000223210,ENSP00000224073,ENSP00000225276,ENSP00000225792,ENSP00000228027…	AASS,ABI2,ACADSB,ACOX3,ACTR5,ADAM19,ADAMTS10,ADAMTS18,ADC,ADCY4,ADCY5,ADORA2A,ADPGK,AGPAT9,AK7,AKT3,ALKBH4,ALOX15,AMPD1,ANAPC16,APLP2,ARF3,ARHGEF6,ARID3A,ARID5B,ARSG,ART5,ASB10,ASCC2,ATOH7,AURKB,BAHD1,BAZ2B,BHLHA9,BHMT,BMP4,BNC1,BSX,CACNA1A,CAMKK1,CAV3,CBLB,CBX4,CCBL2,CCDC111,CCDC155,CCNE2,CCT6A,CDA,CDC14B,CDC25B,CDC42BPG,CDC45,CDK17,CDK5RAP1,CDKL5,CHD1L,CHERP,CHST6,CHST7,CHSY3,CLASRP,CLSPN,CLU,C…
GO.0045937	positive regulation of phosphate metabolic process	66	0.00242	ENSP00000158166,ENSP00000200453,ENSP00000221665,ENSP00000221930,ENSP00000222330,ENSP00000222462,ENSP00000228307,ENSP00000232424,ENSP00000233202,ENSP00000234961,ENSP00000245960,ENSP00000247207,ENSP00000252595,ENSP00000254661,ENSP00000256078,ENSP00000259607,ENSP00000259808,ENSP00000260404,ENSP00000263253,ENSP00000263577,ENSP00000264634,ENSP00000265026,ENSP00000269141,ENSP00000269209,ENSP00000272224…	ADCY4,ADCY5,ADCYAP1,ADORA2A,ADRA1A,ALOX15,CAMKK1,CCL21,CDC25B,CDH2,CDK5R2,CDON,CHP2,CLSPN,CLU,DRD2,EDN1,EP300,FAM59A,FIZ1,FNIP1,FZD5,GDF7,GDF9,GRM1,GSK3A,GUCY1A3,HAX1,HES1,HIPK2,HSPA2,IFNE,IGF1,INHBB,IQGAP3,ITGA5,KRAS,LCK,MAP3K13,MAP3K6,MID1,NRG1,NTF3,OPRD1,P2RX7,PAK4,PAK6,PIFO,PPP1R15A,PRKAA1,PXN,RAMP1,RIPK1,SBK2,SLC11A1,SLC27A1,TERF2IP,TGFB1,TGFB2,TGFBR2,THBS4,WNT16,WNT5A,WNT7A,ZAK,ZP3
GO.0065009	regulation of molecular function	145	0.00242	ENSP00000158166,ENSP00000200453,ENSP00000215727,ENSP00000217244,ENSP00000217372,ENSP00000221930,ENSP00000222145,ENSP00000222330,ENSP00000222792,ENSP00000224073,ENSP00000228307,ENSP00000229812,ENSP00000232424,ENSP00000233202,ENSP00000234961,ENSP00000239223,ENSP00000245960,ENSP00000247207,ENSP00000250617,ENSP00000252595,ENSP00000259607,ENSP00000259808,ENSP00000260404,ENSP00000261574,ENSP00000262659…	ADC,ADCY4,ADCY5,ADCYAP1,ADORA2A,ADRA1A,AGAP3,ANKRD33,APLP2,ARHGAP27,ARHGAP30,ARHGAP4,ARHGAP6,ARHGEF25,ARHGEF3,ARHGEF40,ARHGEF6,ARID5B,AURKB,CACNB3,CAMKK1,CAV3,CCL21,CCM2L,CCNB3,CDC14B,CDC25B,CDK5RAP1,CDKL5,CDON,CHN2,CHP2,CLIC2,CLSPN,CLU,CSNK2A1,CTSS,CUL1,CYTH3,DBF4,DDX58,DENND4B,DENND6B,DEPDC1B,DOCK11,DRD2,DUSP1,DUSP6,EBAG9,ECSIT,EDF1,EDN1,EIF2B2,ERBB2IP,ERRFI1,FBLN1,FBXO31,FGFR1OP,FNIP1,FXYD1,FZ…
GO.0009987	cellular process	510	0.00284	ENSP00000061240,ENSP00000158166,ENSP00000167106,ENSP00000169298,ENSP00000187762,ENSP00000202625,ENSP00000206423,ENSP00000210633,ENSP00000215530,ENSP00000215742,ENSP00000215904,ENSP00000217244,ENSP00000217961,ENSP00000219593,ENSP00000221455,ENSP00000221466,ENSP00000221665,ENSP00000221930,ENSP00000222330,ENSP00000222462,ENSP00000222792,ENSP00000223210,ENSP00000224073,ENSP00000225276,ENSP00000225792…	AASS,ABCG8,ABI2,ABI3,ACADSB,ACOX3,ACTR1A,ACTR5,ADAMTS13,ADC,ADCY4,ADCYAP1,ADORA2A,ADPGK,ADRA1A,AGAP3,AGPAT9,AKT3,ALKBH4,ALOX15,AMPD1,ANAPC16,ANKRD33,ANO5,ARFIP2,ARHGAP27,ARHGAP30,ARHGAP4,ARHGEF3,ARHGEF6,ARID3A,ARSG,ART5,ASB10,ASCC2,ATOH7,ATP11A,ATP2C2,AURKB,AVEN,BAHD1,BAIAP2L2,BAZ2B,BBS9,BCS1L,BHLHA9,BHMT,BICD2,BMP4,BNC1,BOC,BRWD3,BSX,BTBD11,CAMKK1,CAV3,CBX4,CCDC111,CCDC124,CCDC155,CCDC176,CCDC80…
GO.1902531	regulation of intracellular signal transduction	86	0.00284	ENSP00000080059,ENSP00000221930,ENSP00000222330,ENSP00000222462,ENSP00000222792,ENSP00000225792,ENSP00000228307,ENSP00000229812,ENSP00000232424,ENSP00000233954,ENSP00000250617,ENSP00000255175,ENSP00000259607,ENSP00000259808,ENSP00000260404,ENSP00000262992,ENSP00000263577,ENSP00000264409,ENSP00000264634,ENSP00000265026,ENSP00000265036,ENSP00000269141,ENSP00000269209,ENSP00000272190,ENSP00000272224…	ADCYAP1,ADRA1A,AGPAT9,AKR1B1,ALOX15,ARHGAP30,ARHGAP4,ARHGAP6,ARHGEF3,ARHGEF6,CAV3,CCL21,CDH2,CDON,CHN2,CHP2,CLU,DDX5,DENND4B,DEPDC1B,DRD2,DUSP6,EDN1,ERBB2IP,ERRFI1,FAM59A,FBLN1,FNIP1,FZD5,GDF7,GDF9,GRM1,GSK3A,HAX1,HDAC7,HES1,HIPK2,IGF1,IL1RL1,ILK,INHBB,INPP4B,IQGAP3,KCTD7,MAP3K13,MAP3K6,MARVELD3,MID1,NEDD4,NEUROD2,NRG1,NTF3,P2RX7,PAK4,PAK6,PBK,PDCD4,PER1,PIM2,PLA2R1,PRKAA1,PXN,RASGRP4,REN,RHOBTB1…
GO.0044237	cellular metabolic process	368	0.00286	ENSP00000001008,ENSP00000080059,ENSP00000158166,ENSP00000169298,ENSP00000202625,ENSP00000215742,ENSP00000215904,ENSP00000216027,ENSP00000216185,ENSP00000217133,ENSP00000217244,ENSP00000217372,ENSP00000217961,ENSP00000221455,ENSP00000221665,ENSP00000221930,ENSP00000222120,ENSP00000222219,ENSP00000222330,ENSP00000223210,ENSP00000224073,ENSP00000225276,ENSP00000225792,ENSP00000228027,ENSP00000228307…	AASS,ABI2,ACADSB,ACOX3,ACTR5,ADAMTS13,ADC,ADCY4,ADCY5,ADORA2A,ADPGK,AGPAT9,AK7,AKT3,ALKBH4,ALOX15,AMPD1,ANAPC16,ARF3,ARHGEF6,ARID3A,ARID5B,ARSG,ART5,ASB10,ASCC2,ATOH7,AURKB,BAHD1,BAZ2B,BHLHA9,BHMT,BMP4,BNC1,BSX,CA9,CAMKK1,CAV3,CBLB,CBX4,CCDC111,CCDC155,CCNE2,CCT6A,CDA,CDC14B,CDC25B,CDC42BPG,CDC45,CDK17,CDK5RAP1,CDKL5,CHD1L,CHERP,CHST13,CHST6,CHST7,CHST8,CHSY3,CLASRP,CLSPN,CLU,COX7C,CSNK2A1,CTPS1,…
GO.0048593	camera-type eye morphogenesis	16	0.003	ENSP00000222462,ENSP00000245451,ENSP00000261483,ENSP00000263577,ENSP00000264634,ENSP00000265602,ENSP00000299293,ENSP00000307342,ENSP00000332256,ENSP00000347444,ENSP00000354607,ENSP00000367797,ENSP00000369320,ENSP00000371070,ENSP00000385571,ENSP00000396259	AHI1,ALDH1A3,ATP8A2,BMP4,CDON,FRS2,FZD5,HCN1,HIPK2,MAN2A1,PAX2,RS1,SKI,TDRD7,WNT16,WNT5A
GO.0051174	regulation of phosphorus metabolic process	92	0.00318	ENSP00000158166,ENSP00000217372,ENSP00000218032,ENSP00000221665,ENSP00000221930,ENSP00000222330,ENSP00000222462,ENSP00000228307,ENSP00000229812,ENSP00000232424,ENSP00000233202,ENSP00000234961,ENSP00000245451,ENSP00000245960,ENSP00000247207,ENSP00000254661,ENSP00000256078,ENSP00000259607,ENSP00000259808,ENSP00000260404,ENSP00000263253,ENSP00000263574,ENSP00000263577,ENSP00000264634,ENSP00000264694…	ADCY4,ADCY5,ADCYAP1,ADORA2A,ADRA1A,ALOX15,APLP2,BMP4,CAMKK1,CAV3,CCL21,CCNB3,CDA,CDC25B,CDH2,CDK5RAP1,CDON,CHP2,CLSPN,CLU,DRD2,DUSP6,EDN1,EP300,EPB49,FAM59A,FBLN1,FBXO31,FGFR1OP,FIZ1,FNIP1,FZD5,GCKR,GDF7,GDF9,GRM1,GSK3A,GUCY1A3,HAX1,HES1,HIPK2,HSPA2,IFNE,IGF1,INHBB,IQGAP3,ITGA5,KCTD7,KIRREL,KRAS,LCK,MAP3K13,MAP3K6,MARVELD3,MID1,NRG1,NTF3,OPRD1,P2RX7,PAK4,PAK6,PBK,PDCD4,PDGFD,PDPR,PER1,PIFO,PXN,RA…
GO.0001763	morphogenesis of a branching structure	22	0.00347	ENSP00000221930,ENSP00000222145,ENSP00000227163,ENSP00000228307,ENSP00000256078,ENSP00000259803,ENSP00000262461,ENSP00000264634,ENSP00000265354,ENSP00000272224,ENSP00000299293,ENSP00000299421,ENSP00000302665,ENSP00000321797,ENSP00000351905,ENSP00000354607,ENSP00000354859,ENSP00000368683,ENSP00000371936,ENSP00000374309,ENSP00000376322,ENSP00000396259	DRD2,EDN1,FGF8,FRS2,FZD5,GCM1,GDF7,HOXD13,IGF1,ILK,KRAS,LAMA1,PAX2,PXN,RASIP1,SEMA5A,SLC12A2,SPI1,SRF,TGFB1,TGFBR2,WNT5A
GO.0019220	regulation of phosphate metabolic process	91	0.00353	ENSP00000158166,ENSP00000217372,ENSP00000218032,ENSP00000221665,ENSP00000221930,ENSP00000222330,ENSP00000222462,ENSP00000228307,ENSP00000229812,ENSP00000232424,ENSP00000233202,ENSP00000234961,ENSP00000245451,ENSP00000245960,ENSP00000247207,ENSP00000254661,ENSP00000256078,ENSP00000259607,ENSP00000259808,ENSP00000260404,ENSP00000263253,ENSP00000263574,ENSP00000263577,ENSP00000264634,ENSP00000264694…	ADCY4,ADCY5,ADCYAP1,ADORA2A,ADRA1A,ALOX15,APLP2,BMP4,CAMKK1,CAV3,CCL21,CCNB3,CDA,CDC25B,CDH2,CDK5RAP1,CDON,CHP2,CLSPN,CLU,DRD2,DUSP6,EDN1,EP300,EPB49,FAM59A,FBLN1,FBXO31,FGFR1OP,FIZ1,FNIP1,FZD5,GCKR,GDF7,GDF9,GRM1,GSK3A,GUCY1A3,HAX1,HES1,HIPK2,HSPA2,IFNE,IGF1,INHBB,IQGAP3,ITGA5,KCTD7,KIRREL,KRAS,LCK,MAP3K13,MAP3K6,MARVELD3,MID1,NRG1,NTF3,OPRD1,P2RX7,PAK4,PAK6,PBK,PDCD4,PDGFD,PER1,PIFO,PXN,RAMP1,R…
GO.0043085	positive regulation of catalytic activity	87	0.0036	ENSP00000158166,ENSP00000200453,ENSP00000221930,ENSP00000222330,ENSP00000222792,ENSP00000228307,ENSP00000233202,ENSP00000245451,ENSP00000245960,ENSP00000247207,ENSP00000250617,ENSP00000252595,ENSP00000259607,ENSP00000259808,ENSP00000260404,ENSP00000264400,ENSP00000264634,ENSP00000265026,ENSP00000265036,ENSP00000265728,ENSP00000265965,ENSP00000266126,ENSP00000276202,ENSP00000282753,ENSP00000286827…	ADC,ADCY4,ADCY5,ADCYAP1,ADORA2A,ADRA1A,AGAP3,ARHGAP27,ARHGAP30,ARHGAP4,ARHGAP6,ARHGEF25,ARHGEF3,ARHGEF40,ARHGEF6,BMP4,CAMKK1,CCL21,CDC14B,CDC25B,CDK5R2,CDKL5,CHN2,CHP2,CLSPN,CLU,CUL1,CYTH3,DBF4,DENND4B,DENND6B,DEPDC1B,DOCK11,DRD2,EBAG9,EDN1,EIF2B2,ERRFI1,FBLN1,FNIP1,FZD5,GRM1,GSK3A,GTF2F1,HSPA2,ILK,IQGAP3,KCTD7,LCK,MAP3K13,MAP3K6,MCF2L2,NRG1,NTF3,P2RX7,PAK4,PAK6,PICALM,PIFO,PPP1R15A,PRKAA1,PSD3,P…
GO.0002088	lens development in camera-type eye	12	0.00426	ENSP00000221930,ENSP00000245451,ENSP00000263577,ENSP00000264634,ENSP00000285018,ENSP00000295728,ENSP00000299293,ENSP00000308887,ENSP00000347444,ENSP00000351905,ENSP00000367797,ENSP00000385571	BMP4,CDON,CRYBA2,FRS2,HIPK2,SKI,TDRD7,TGFB1,TGFBR2,WNT5A,WNT5B,WNT7A
GO.0061138	morphogenesis of a branching epithelium	21	0.00426	ENSP00000221930,ENSP00000222145,ENSP00000227163,ENSP00000228307,ENSP00000256078,ENSP00000259803,ENSP00000262461,ENSP00000264634,ENSP00000265354,ENSP00000272224,ENSP00000299293,ENSP00000299421,ENSP00000302665,ENSP00000321797,ENSP00000351905,ENSP00000354607,ENSP00000368683,ENSP00000371936,ENSP00000374309,ENSP00000376322,ENSP00000396259	EDN1,FGF8,FRS2,FZD5,GCM1,GDF7,HOXD13,IGF1,ILK,KRAS,LAMA1,PAX2,PXN,RASIP1,SEMA5A,SLC12A2,SPI1,SRF,TGFB1,TGFBR2,WNT5A
GO.0009887	organ morphogenesis	60	0.00464	ENSP00000221930,ENSP00000222330,ENSP00000222462,ENSP00000228682,ENSP00000232424,ENSP00000245451,ENSP00000248572,ENSP00000256078,ENSP00000258411,ENSP00000261483,ENSP00000262461,ENSP00000262659,ENSP00000263253,ENSP00000263577,ENSP00000264634,ENSP00000264956,ENSP00000265354,ENSP00000265602,ENSP00000272224,ENSP00000279873,ENSP00000285018,ENSP00000294638,ENSP00000299293,ENSP00000299421,ENSP00000302216…	AHI1,ARID5B,ATOH1,ATP8A2,BMP4,BSX,CAV3,CCM2L,CDON,CTNNA1,CTNNA2,CUL1,EDN1,EP300,ERRFI1,EVC,FGF8,FRS2,FZD5,GAMT,GDF7,GLI1,GNGT1,GSK3A,HCN1,HES1,HIPK2,HOXD13,IGF1,ILK,KRAS,LAMA1,LHX8,MAN2A1,NEDD4,NRG1,OTX2,P2RX7,PAX2,POU3F4,PPP1R13L,PTPLA,RBPJ,RS1,S1PR1,SKI,SLC12A2,SLC39A1,SRF,TCAP,TDRD7,TGFB1,TGFB2,TGFBR2,TNNI3,TSHZ1,WNT10A,WNT16,WNT5A,WNT7A
GO.0002009	morphogenesis of an epithelium	37	0.00545	ENSP00000221930,ENSP00000222145,ENSP00000222462,ENSP00000227163,ENSP00000228307,ENSP00000232424,ENSP00000254799,ENSP00000256078,ENSP00000258411,ENSP00000259803,ENSP00000262461,ENSP00000264634,ENSP00000265354,ENSP00000265602,ENSP00000267119,ENSP00000272224,ENSP00000285018,ENSP00000293379,ENSP00000295694,ENSP00000299293,ENSP00000299421,ENSP00000302665,ENSP00000312624,ENSP00000321797,ENSP00000332256…	AHI1,ALDH1A3,CA9,EDN1,FGF8,FRS2,FZD5,GCM1,GDF7,GRSF1,HES1,HOXD13,IGF1,ILK,ITGA5,KRAS,KRT71,LAMA1,PAX2,PXN,RASIP1,RBPJ,SEMA5A,SKI,SLC12A2,SPI1,SRF,TCAP,TGFB1,TGFB2,TGFBR2,TMEM79,TOR1A,WNT10A,WNT16,WNT5A,WNT7A
GO.0045859	regulation of protein kinase activity	50	0.00545	ENSP00000158166,ENSP00000217372,ENSP00000221930,ENSP00000228307,ENSP00000229812,ENSP00000233202,ENSP00000239223,ENSP00000245451,ENSP00000245960,ENSP00000247207,ENSP00000252595,ENSP00000259607,ENSP00000259808,ENSP00000260404,ENSP00000263574,ENSP00000264634,ENSP00000265026,ENSP00000276014,ENSP00000279488,ENSP00000280154,ENSP00000282753,ENSP00000299421,ENSP00000310841,ENSP00000311857,ENSP00000312126…	ADCY4,ADCY5,ADCYAP1,APLP2,BMP4,CAMKK1,CAV3,CCL21,CCNB3,CDC25B,CDK5RAP1,CLSPN,CLU,DRD2,DUSP1,DUSP6,EDN1,ERRFI1,FBXO31,FGFR1OP,FZD5,GRM1,HSPA2,ILK,IQGAP3,MAP3K13,MAP3K6,NRG1,NTF3,P2RX7,PAK4,PAK6,PDCD4,PRKAA1,PTPN2,PXN,RIPK1,SBK2,SH3BP5L,SLC11A1,SLC27A1,SOCS2,STK38,TGFB1,TGFB2,TGFBR2,WNT5A,ZAK,ZGPAT,ZP3
GO.0006357	regulation of transcription from RNA polymerase II promoter	97	0.00622	ENSP00000080059,ENSP00000200453,ENSP00000222330,ENSP00000225792,ENSP00000227163,ENSP00000232424,ENSP00000233202,ENSP00000245414,ENSP00000245451,ENSP00000254806,ENSP00000258123,ENSP00000259803,ENSP00000259808,ENSP00000261596,ENSP00000263577,ENSP00000263620,ENSP00000264634,ENSP00000264808,ENSP00000265354,ENSP00000265602,ENSP00000267807,ENSP00000269397,ENSP00000271640,ENSP00000272224,ENSP00000279386…	ADCYAP1,AHI1,ANKAR,ANKRD33,ARID3A,ARID5B,ATOH1,AURKB,BMP4,BNC1,BRWD3,BSX,CA9,CBX4,CDC45,CDON,CHP2,CTR9,DDX5,DDX58,DRD2,EDN1,FGF8,FNIP1,FOXK1,FOXO4,FUBP1,FZD5,GCFC1,GCM1,GDF7,GDF9,GSK3A,GTF2F1,HAX1,HDAC7,HDAC8,HES1,HIPK2,HMX1,HNRNPAB,HOXD13,IGF1,IKBKG,IRF1,IRF5,KLF7,LPIN2,MAMLD1,MBTPS2,MXD4,MYBL1,MYPOP,NCOA6,NEDD4,NEDD4L,NHLH2,NKAP,NTF3,OTX2,PER1,POU3F4,PPP1R13L,PPP1R15A,PRDM5,RBPJ,RFX4,RIPK1,RLF,…
GO.0071840	cellular component organization or biogenesis	230	0.00686	ENSP00000001008,ENSP00000061240,ENSP00000080059,ENSP00000167588,ENSP00000206423,ENSP00000215904,ENSP00000217133,ENSP00000217244,ENSP00000221930,ENSP00000222219,ENSP00000222462,ENSP00000227163,ENSP00000229340,ENSP00000229854,ENSP00000230640,ENSP00000231368,ENSP00000233202,ENSP00000233944,ENSP00000241274,ENSP00000242067,ENSP00000245451,ENSP00000249269,ENSP00000250156,ENSP00000250617,ENSP00000252456…	AASS,ABI2,ACTR1A,ADC,ADCYAP1,AHI1,AK7,AKT3,ALKBH4,ALOX15,ANAPC16,APLP2,ARFIP2,ARHGAP4,ARHGEF6,ARID5B,ATOH1,ATP11A,AURKB,BAHD1,BAIAP2L2,BBS9,BCS1L,BICD2,BMP4,BNC1,BRWD3,CACNA1A,CACNA1I,CACNB3,CAV3,CBX4,CCDC111,CCDC155,CCDC176,CCDC80,CCL21,CDA,CDC42BPG,CDC45,CDCA8,CDK5RAP2,CDKL5,CENPP,CEP76,CHD1L,CHMP7,CLSPN,CLU,CNN1,COG4,COL6A1,CSNK2A1,CTNNA2,CTR9,CTSS,DDB2,DDX47,DHRS4,DNAH1,DNASE2,DRD2,EDN1,EGFL6…
GO.0043549	regulation of kinase activity	52	0.00724	ENSP00000158166,ENSP00000217372,ENSP00000221930,ENSP00000228307,ENSP00000229812,ENSP00000233202,ENSP00000239223,ENSP00000245451,ENSP00000245960,ENSP00000247207,ENSP00000252595,ENSP00000259607,ENSP00000259808,ENSP00000260404,ENSP00000263574,ENSP00000264634,ENSP00000264717,ENSP00000265026,ENSP00000276014,ENSP00000279488,ENSP00000280154,ENSP00000282753,ENSP00000299421,ENSP00000310841,ENSP00000311857…	ADCY4,ADCY5,ADCYAP1,APLP2,BMP4,CAMKK1,CAV3,CCL21,CCNB3,CDC25B,CDK5RAP1,CLSPN,CLU,DRD2,DUSP1,DUSP6,EDN1,ERRFI1,FBXO31,FGFR1OP,FZD5,GCKR,GRM1,HSPA2,ILK,IQGAP3,MAP3K13,MAP3K6,NRG1,NTF3,P2RX7,PAK4,PAK6,PDCD4,PIFO,PRKAA1,PTPN2,PXN,RIPK1,SBK2,SH3BP5L,SLC11A1,SLC27A1,SOCS2,STK38,TGFB1,TGFB2,TGFBR2,WNT5A,ZAK,ZGPAT,ZP3
GO.0045860	positive regulation of protein kinase activity	36	0.00724	ENSP00000158166,ENSP00000221930,ENSP00000228307,ENSP00000233202,ENSP00000245451,ENSP00000245960,ENSP00000247207,ENSP00000252595,ENSP00000259607,ENSP00000259808,ENSP00000260404,ENSP00000264634,ENSP00000265026,ENSP00000282753,ENSP00000299421,ENSP00000304250,ENSP00000312126,ENSP00000312995,ENSP00000315130,ENSP00000345044,ENSP00000346148,ENSP00000349275,ENSP00000350195,ENSP00000351049,ENSP00000351905…	ADCY4,ADCY5,ADCYAP1,BMP4,CAMKK1,CCL21,CDC25B,CDK5R2,CLSPN,CLU,DRD2,EDN1,FZD5,GRM1,HSPA2,ILK,IQGAP3,MAP3K13,MAP3K6,NRG1,NTF3,P2RX7,PAK4,PAK6,PRKAA1,PXN,RIPK1,SBK2,SLC11A1,SLC27A1,TGFB1,TGFB2,TGFBR2,WNT5A,ZAK,ZP3
GO.0045165	cell fate commitment	24	0.00858	ENSP00000222462,ENSP00000232424,ENSP00000245451,ENSP00000258411,ENSP00000259803,ENSP00000263577,ENSP00000264634,ENSP00000272224,ENSP00000279386,ENSP00000285018,ENSP00000299293,ENSP00000302216,ENSP00000308887,ENSP00000321797,ENSP00000343819,ENSP00000345206,ENSP00000349275,ENSP00000354607,ENSP00000355013,ENSP00000355896,ENSP00000381739,ENSP00000385571,ENSP00000396259,ENSP00000397297	ATOH1,BMP4,CDON,CTR9,FGF8,FRS2,FZD5,GCM1,GDF7,HES1,HIPK2,NRG1,NTF3,OTX2,PAX2,RBPJ,TBX6,TGFB2,WNT10A,WNT16,WNT5A,WNT5B,WNT7A,WNT8A
GO.0033674	positive regulation of kinase activity	37	0.0104	ENSP00000158166,ENSP00000221930,ENSP00000228307,ENSP00000233202,ENSP00000245451,ENSP00000245960,ENSP00000247207,ENSP00000252595,ENSP00000259607,ENSP00000259808,ENSP00000260404,ENSP00000264634,ENSP00000265026,ENSP00000282753,ENSP00000299421,ENSP00000304250,ENSP00000312126,ENSP00000312995,ENSP00000315130,ENSP00000345044,ENSP00000346148,ENSP00000349275,ENSP00000350195,ENSP00000351049,ENSP00000351905…	ADCY4,ADCY5,ADCYAP1,BMP4,CAMKK1,CCL21,CDC25B,CDK5R2,CLSPN,CLU,DRD2,EDN1,FZD5,GRM1,HSPA2,ILK,IQGAP3,MAP3K13,MAP3K6,NRG1,NTF3,P2RX7,PAK4,PAK6,PIFO,PRKAA1,PXN,RIPK1,SBK2,SLC11A1,SLC27A1,TGFB1,TGFB2,TGFBR2,WNT5A,ZAK,ZP3
GO.0043547	positive regulation of GTPase activity	38	0.0131	ENSP00000222792,ENSP00000250617,ENSP00000259607,ENSP00000264400,ENSP00000265036,ENSP00000265965,ENSP00000266126,ENSP00000276202,ENSP00000286827,ENSP00000297044,ENSP00000298694,ENSP00000305416,ENSP00000310193,ENSP00000324127,ENSP00000328118,ENSP00000335560,ENSP00000338967,ENSP00000339521,ENSP00000341071,ENSP00000341489,ENSP00000349291,ENSP00000354451,ENSP00000354597,ENSP00000355523,ENSP00000356992…	ADCYAP1,AGAP3,ARHGAP27,ARHGAP30,ARHGAP4,ARHGAP6,ARHGEF25,ARHGEF3,ARHGEF40,ARHGEF6,CCL21,CDKL5,CHN2,CYTH3,DENND4B,DENND6B,DEPDC1B,DOCK11,EIF2B2,ERRFI1,FNIP1,IQGAP3,KCTD7,MCF2L2,NTF3,PSD3,RASGEF1B,RASGRP4,RGL3,RGS6,RGS7,RSU1,S1PR1,SERGEF,SYDE1,TBC1D10C,TBC1D9B,TIAM1
GO.0044699	single-organism process	440	0.0143	ENSP00000061240,ENSP00000158166,ENSP00000167106,ENSP00000167588,ENSP00000169298,ENSP00000187762,ENSP00000206423,ENSP00000210633,ENSP00000215530,ENSP00000215727,ENSP00000215904,ENSP00000217133,ENSP00000217244,ENSP00000217372,ENSP00000219593,ENSP00000221466,ENSP00000221930,ENSP00000222120,ENSP00000222330,ENSP00000222462,ENSP00000222792,ENSP00000223167,ENSP00000224073,ENSP00000225276,ENSP00000225941…	AASS,ABCG8,ABI2,ABI3,ACADSB,ACTR1A,ACTR5,ADAM19,ADAMTS13,ADAMTS18,ADC,ADCY4,ADCYAP1,ADORA2A,ADPGK,ADRA1A,AGAP3,AGPAT9,AKT3,ALKBH4,ALOX15,AMPD1,ANAPC16,ANGPTL2,ANKH,ANKRD33,ANO5,ARFIP2,ARHGAP27,ARHGAP30,ARHGAP4,ARHGEF3,ARHGEF6,ARSG,ART5,ASB10,ASCC2,ATOH7,ATP11A,ATP13A1,ATP2C2,AURKB,AVEN,BAHD1,BAIAP2L2,BBS9,BHLHA9,BHMT,BICD2,BMP4,BOC,BSX,BTBD11,C16orf62,CAMKK1,CAV3,CCDC111,CCDC120,CCDC124,CCDC155,C…
GO.0048592	eye morphogenesis	17	0.0149	ENSP00000222462,ENSP00000245451,ENSP00000248572,ENSP00000261483,ENSP00000263577,ENSP00000264634,ENSP00000265602,ENSP00000299293,ENSP00000307342,ENSP00000343819,ENSP00000347444,ENSP00000354607,ENSP00000367797,ENSP00000369320,ENSP00000371070,ENSP00000385571,ENSP00000396259	AHI1,ATP8A2,BMP4,CDON,FRS2,FZD5,GNGT1,HCN1,HIPK2,MAN2A1,OTX2,PAX2,RS1,SKI,TDRD7,WNT16,WNT5A
GO.0060395	SMAD protein signal transduction	10	0.0151	ENSP00000221930,ENSP00000231368,ENSP00000245451,ENSP00000272224,ENSP00000280758,ENSP00000295228,ENSP00000296875,ENSP00000355896,ENSP00000367797,ENSP00000385571	BMP4,BTBD11,GDF7,GDF9,HIPK2,INHBB,LNPEP,SKI,TGFB1,TGFB2
GO.2000725	regulation of cardiac muscle cell differentiation	6	0.0191	ENSP00000222330,ENSP00000245451,ENSP00000341940,ENSP00000345206,ENSP00000349275,ENSP00000362778	BMP4,CAV3,GSK3A,NRG1,PI16,RBPJ
GO.0043087	regulation of GTPase activity	40	0.02	ENSP00000222145,ENSP00000222792,ENSP00000250617,ENSP00000259607,ENSP00000261574,ENSP00000264400,ENSP00000265036,ENSP00000265965,ENSP00000266126,ENSP00000276202,ENSP00000286827,ENSP00000297044,ENSP00000298694,ENSP00000305416,ENSP00000310193,ENSP00000324127,ENSP00000328118,ENSP00000335560,ENSP00000338967,ENSP00000339521,ENSP00000341071,ENSP00000341489,ENSP00000349291,ENSP00000354451,ENSP00000354597…	ADCYAP1,AGAP3,ARHGAP27,ARHGAP30,ARHGAP4,ARHGAP6,ARHGEF25,ARHGEF3,ARHGEF40,ARHGEF6,CCL21,CDKL5,CHN2,CYTH3,DENND4B,DENND6B,DEPDC1B,DOCK11,EIF2B2,ERRFI1,FNIP1,IPO5,IQGAP3,KCTD7,MCF2L2,NTF3,PSD3,RASGEF1B,RASGRP4,RASIP1,RGL3,RGS6,RGS7,RSU1,S1PR1,SERGEF,SYDE1,TBC1D10C,TBC1D9B,TIAM1
GO.0048596	embryonic camera-type eye morphogenesis	7	0.0206	ENSP00000222462,ENSP00000264634,ENSP00000299293,ENSP00000332256,ENSP00000354607,ENSP00000385571,ENSP00000396259	ALDH1A3,FRS2,FZD5,HIPK2,PAX2,WNT16,WNT5A
GO.0016043	cellular component organization	221	0.0207	ENSP00000001008,ENSP00000061240,ENSP00000080059,ENSP00000167588,ENSP00000206423,ENSP00000215904,ENSP00000217133,ENSP00000217244,ENSP00000221930,ENSP00000222219,ENSP00000222462,ENSP00000227163,ENSP00000229340,ENSP00000229854,ENSP00000231368,ENSP00000233202,ENSP00000233944,ENSP00000241274,ENSP00000242067,ENSP00000245451,ENSP00000249269,ENSP00000250617,ENSP00000252456,ENSP00000253108,ENSP00000253699…	AASS,ABI2,ACTR1A,ADC,ADCYAP1,AHI1,AK7,AKT3,ALKBH4,ALOX15,ANAPC16,APLP2,ARFIP2,ARHGAP4,ARHGEF6,ARID5B,ATOH1,ATP11A,AURKB,BAHD1,BAIAP2L2,BBS9,BCS1L,BICD2,BMP4,BNC1,BRWD3,CACNA1A,CACNA1I,CACNB3,CAV3,CBX4,CCDC111,CCDC155,CCDC176,CCDC80,CCL21,CDA,CDC42BPG,CDC45,CDCA8,CDK5RAP2,CDKL5,CENPP,CEP76,CHD1L,CHMP7,CLSPN,CLU,CNN1,COG4,COL6A1,CSNK2A1,CTNNA2,CTR9,CTSS,DDB2,DHRS4,DNAH1,DNASE2,DRD2,EDN1,EGFL6,EHD1,…
GO.0048522	positive regulation of cellular process	206	0.0207	ENSP00000080059,ENSP00000158166,ENSP00000200453,ENSP00000206423,ENSP00000215904,ENSP00000217244,ENSP00000217961,ENSP00000218032,ENSP00000221665,ENSP00000221930,ENSP00000222120,ENSP00000222330,ENSP00000222462,ENSP00000222792,ENSP00000224073,ENSP00000225792,ENSP00000227163,ENSP00000228307,ENSP00000229268,ENSP00000232424,ENSP00000233202,ENSP00000233954,ENSP00000234961,ENSP00000239223,ENSP00000241274…	ABAT,ABI2,ADC,ADCY4,ADCY5,ADCYAP1,ADORA2A,ADRA1A,AHI1,AKR1B1,ALDH1A3,ANKAR,ARHGAP4,ARHGAP6,ARHGEF3,ARHGEF6,ARID3A,ARID5B,ATP8A2,AURKB,BAIAP2L2,BMP4,BOC,BSX,CAMKK1,CAV3,CCDC80,CCL21,CD180,CDC14B,CDC45,CDK5R2,CDK5RAP2,CDKL5,CDKN2AIP,CHERP,CHN2,CHP2,CLSPN,CLU,CSNK2A1,CTNNA2,CTR9,CTSS,CUL1,CYTH3,DBC1,DDX5,DDX58,DEPDC1B,DRD2,DUSP1,DUSP6,EBAG9,EDF1,EDN1,EGFL6,EHD1,EHD2,EP300,EPB49,EVC,FAM59A,FBXO31,FGF…
GO.0060389	pathway-restricted SMAD protein phosphorylation	5	0.0207	ENSP00000221930,ENSP00000258123,ENSP00000272224,ENSP00000351905,ENSP00000355896	GDF7,TGFB1,TGFB2,TGFBR2,USP15
GO.0060900	embryonic camera-type eye formation	5	0.0207	ENSP00000222462,ENSP00000264634,ENSP00000299293,ENSP00000332256,ENSP00000396259	ALDH1A3,FRS2,PAX2,WNT16,WNT5A
GO.0061052	negative regulation of cell growth involved in cardiac muscle cell development	3	0.0207	ENSP00000222330,ENSP00000341940,ENSP00000362778	CAV3,GSK3A,PI16
GO.0007423	sensory organ development	38	0.0216	ENSP00000221930,ENSP00000222462,ENSP00000232424,ENSP00000245451,ENSP00000248572,ENSP00000258411,ENSP00000261483,ENSP00000263577,ENSP00000264634,ENSP00000265354,ENSP00000265602,ENSP00000282849,ENSP00000285018,ENSP00000295728,ENSP00000299293,ENSP00000302216,ENSP00000302665,ENSP00000307342,ENSP00000308610,ENSP00000308887,ENSP00000312624,ENSP00000321797,ENSP00000323584,ENSP00000343819,ENSP00000345206…	ADAMTS18,AHI1,ATOH1,ATOH7,ATP8A2,BMP4,CDON,CRYBA2,EDN1,FGF8,FRS2,FZD5,GNGT1,GPD2,HCN1,HES1,IGF1,LAMA1,MAN2A1,OTX2,PAX2,POU3F4,PPP1R13L,RBPJ,RS1,SKI,SRF,TCAP,TDRD7,TGFB1,TGFB2,TGFBR2,TSHZ1,WNT10A,WNT16,WNT5A,WNT5B,WNT7A
GO.0009948	anterior/posterior axis specification	9	0.0216	ENSP00000245451,ENSP00000264634,ENSP00000265354,ENSP00000279386,ENSP00000299293,ENSP00000354607,ENSP00000356480,ENSP00000367797,ENSP00000381739	BMP4,FRS2,FZD5,RNF2,SKI,SRF,TBX6,WNT5A,WNT8A
GO.0051247	positive regulation of protein metabolic process	81	0.0218	ENSP00000158166,ENSP00000200453,ENSP00000217244,ENSP00000218032,ENSP00000221665,ENSP00000221930,ENSP00000222330,ENSP00000222462,ENSP00000228307,ENSP00000229268,ENSP00000232424,ENSP00000233202,ENSP00000234961,ENSP00000245414,ENSP00000245960,ENSP00000247207,ENSP00000252595,ENSP00000254661,ENSP00000254806,ENSP00000256078,ENSP00000259607,ENSP00000259808,ENSP00000260404,ENSP00000263253,ENSP00000263577…	ADCY4,ADCY5,ADCYAP1,ADRA1A,ALOX15,CAMKK1,CAV3,CBLB,CCL21,CDC14B,CDC25B,CDH2,CDK5R2,CDON,CHP2,CLSPN,CLU,CSNK2A1,CTR9,CUL1,DRD2,EBAG9,EDN1,EP300,FAM59A,FBLN1,FIZ1,FNIP1,FZD5,GCFC1,GDF7,GDF9,GRM1,GSK3A,HAX1,HES1,HIPK2,HSPA2,IFNE,IGF1,ILK,INHBB,IQGAP3,IRF1,ITGA5,KRAS,MAP3K13,MAP3K6,MID1,NEDD4,NRG1,NTF3,OPRD1,P2RX7,PAK4,PAK6,PICALM,PPP1R15A,PRKAA1,PXN,RAMP1,RIPK1,RUVBL2,SBK2,SH3D19,SLC11A1,SLC27A1,SOA…
GO.0050789	regulation of biological process	395	0.0237	ENSP00000080059,ENSP00000158166,ENSP00000167106,ENSP00000167588,ENSP00000206423,ENSP00000215530,ENSP00000215727,ENSP00000215742,ENSP00000215904,ENSP00000216185,ENSP00000217244,ENSP00000217372,ENSP00000217961,ENSP00000219593,ENSP00000221466,ENSP00000221665,ENSP00000221930,ENSP00000222120,ENSP00000222145,ENSP00000222330,ENSP00000222462,ENSP00000222792,ENSP00000223210,ENSP00000224073,ENSP00000225941…	ABAT,ABCG8,ABI2,ABI3,ACTR5,ADAMTS13,ADAMTS18,ADC,ADCYAP1,ADORA2A,ADRA1A,AGAP3,AGPAT9,AHI1,AKR1B1,AKT3,ALDH1A3,ALKBH4,ANKAR,ANKH,ANKRD33,ARF3,ARFIP2,ARHGAP27,ARHGAP30,ARHGAP4,ARHGAP6,ARHGEF25,ARHGEF3,ARHGEF40,ARHGEF6,ARID3A,ASB10,ASCC2,ASIC3,ATOH7,AURKB,AVEN,BAHD1,BAIAP2L2,BAZ2B,BHLHA9,BHMT,BMP4,BOC,BPIFB1,BRWD3,BSX,BTBD11,CA9,CAMKK1,CAV3,CBX4,CCDC80,CCL21,CCM2L,CCNB3,CD180,CDA,CDC14B,CDC42BPG,CDC…
GO.0044763	single-organism cellular process	419	0.0261	ENSP00000061240,ENSP00000078429,ENSP00000158166,ENSP00000166534,ENSP00000167106,ENSP00000167588,ENSP00000169298,ENSP00000187762,ENSP00000206423,ENSP00000210633,ENSP00000215530,ENSP00000215904,ENSP00000217133,ENSP00000217244,ENSP00000217372,ENSP00000217961,ENSP00000219593,ENSP00000221466,ENSP00000221930,ENSP00000222120,ENSP00000222330,ENSP00000222462,ENSP00000222792,ENSP00000224073,ENSP00000225276…	AASS,ABCG8,ABI2,ABI3,ACADSB,ACOX3,ACTR1A,ACTR5,ADAMTS13,ADC,ADCY4,ADCYAP1,ADORA2A,ADPGK,ADRA1A,AGAP3,AGPAT9,AKT3,ALKBH4,ALOX15,AMPD1,ANAPC16,ANKRD33,ANO5,ARFIP2,ARHGAP27,ARHGAP30,ARHGAP4,ARHGEF3,ARHGEF6,ARID5B,ARSG,ART5,ASB10,ASCC2,ATOH7,ATP11A,ATP2C2,AURKB,AVEN,BAHD1,BAIAP2L2,BBS9,BHMT,BICD2,BMP4,BOC,BTBD11,CA9,CAMKK1,CAV3,CCDC111,CCDC124,CCDC155,CCDC176,CCDC80,CCL21,CCNB3,CCNE2,CCT6A,CD180,CDA,…
GO.0048754	branching morphogenesis of an epithelial tube	17	0.0271	ENSP00000221930,ENSP00000222145,ENSP00000227163,ENSP00000228307,ENSP00000256078,ENSP00000262461,ENSP00000264634,ENSP00000265354,ENSP00000272224,ENSP00000299421,ENSP00000302665,ENSP00000321797,ENSP00000351905,ENSP00000368683,ENSP00000371936,ENSP00000374309,ENSP00000396259	EDN1,FGF8,GDF7,IGF1,ILK,KRAS,LAMA1,PAX2,PXN,RASIP1,SEMA5A,SLC12A2,SPI1,SRF,TGFB1,TGFBR2,WNT5A
GO.0051347	positive regulation of transferase activity	41	0.0274	ENSP00000158166,ENSP00000221930,ENSP00000222330,ENSP00000228307,ENSP00000233202,ENSP00000245451,ENSP00000245960,ENSP00000247207,ENSP00000252595,ENSP00000259607,ENSP00000259808,ENSP00000260404,ENSP00000264634,ENSP00000265026,ENSP00000282753,ENSP00000299421,ENSP00000304250,ENSP00000312126,ENSP00000312995,ENSP00000315130,ENSP00000324897,ENSP00000326804,ENSP00000345044,ENSP00000346148,ENSP00000349275…	ADCY4,ADCY5,ADCYAP1,BMP4,CAMKK1,CCL21,CDC14B,CDC25B,CDK5R2,CLSPN,CLU,CUL1,DRD2,EDN1,FZD5,GRM1,GSK3A,HSPA2,ILK,IQGAP3,MAP3K13,MAP3K6,NRG1,NTF3,P2RX7,PAK4,PAK6,PIFO,PRKAA1,PXN,RIPK1,SBK2,SLC11A1,SLC27A1,TGFB1,TGFB2,TGFBR2,UBE2I,WNT5A,ZAK,ZP3
GO.0008152	metabolic process	400	0.0296	ENSP00000001008,ENSP00000061240,ENSP00000078429,ENSP00000080059,ENSP00000158166,ENSP00000169298,ENSP00000206542,ENSP00000215742,ENSP00000215904,ENSP00000217244,ENSP00000217372,ENSP00000217961,ENSP00000221455,ENSP00000221665,ENSP00000221930,ENSP00000222219,ENSP00000222330,ENSP00000223210,ENSP00000224073,ENSP00000225688,ENSP00000225792,ENSP00000228027,ENSP00000228307,ENSP00000228347,ENSP00000228682…	AASS,ABCC10,ABHD13,ABI2,ACADSB,ACTR5,ADAM19,ADAMTS10,ADAMTS18,ADC,ADCY4,ADCY5,ADORA2A,ADPGK,AGPAT9,AK7,AKT3,ALKBH4,AMPD1,ANAPC16,APLP2,ARF3,ARHGEF6,ARID3A,ARID5B,ARSG,ART5,ASB10,ASCC2,ASMTL,ATOH7,ATP11A,ATP13A1,ATP2C2,ATP7B,ATP8A2,AURKB,BAHD1,BAZ2B,BHLHA9,BHMT,BMP4,BNC1,BSX,CAMKK1,CAV3,CBLB,CBX4,CCDC111,CCDC155,CCNE2,CCT6A,CDA,CDC14B,CDC25B,CDC42BPG,CDC45,CDK17,CDK5RAP1,CDKL5,CHD1L,CHERP,CHST6,CH…
GO.0090596	sensory organ morphogenesis	23	0.03	ENSP00000222462,ENSP00000245451,ENSP00000248572,ENSP00000261483,ENSP00000263577,ENSP00000264634,ENSP00000265602,ENSP00000299293,ENSP00000302216,ENSP00000307342,ENSP00000312624,ENSP00000321797,ENSP00000323584,ENSP00000343819,ENSP00000347444,ENSP00000354607,ENSP00000362296,ENSP00000367797,ENSP00000368683,ENSP00000369320,ENSP00000371070,ENSP00000385571,ENSP00000396259	AHI1,ATOH1,ATP8A2,BMP4,CDON,EDN1,FGF8,FRS2,FZD5,GNGT1,HCN1,HIPK2,MAN2A1,OTX2,PAX2,POU3F4,RS1,SKI,TCAP,TDRD7,TSHZ1,WNT16,WNT5A
GO.0031076	embryonic camera-type eye development	8	0.0313	ENSP00000222462,ENSP00000264634,ENSP00000299293,ENSP00000332256,ENSP00000354218,ENSP00000354607,ENSP00000385571,ENSP00000396259	ALDH1A3,FRS2,FZD5,HIPK2,PAX2,PPP1R13L,WNT16,WNT5A
GO.0001654	eye development	28	0.0322	ENSP00000221930,ENSP00000222462,ENSP00000245451,ENSP00000248572,ENSP00000261483,ENSP00000263577,ENSP00000264634,ENSP00000265354,ENSP00000265602,ENSP00000282849,ENSP00000285018,ENSP00000295728,ENSP00000299293,ENSP00000307342,ENSP00000308610,ENSP00000308887,ENSP00000343819,ENSP00000347444,ENSP00000351905,ENSP00000354218,ENSP00000354607,ENSP00000355896,ENSP00000362777,ENSP00000367797,ENSP00000369320…	ADAMTS18,AHI1,ATOH7,ATP8A2,BMP4,CDON,CRYBA2,FRS2,FZD5,GNGT1,GPD2,HCN1,LAMA1,MAN2A1,OTX2,PAX2,PPP1R13L,RS1,SKI,SRF,TDRD7,TGFB1,TGFB2,TGFBR2,WNT16,WNT5A,WNT5B,WNT7A
GO.0043010	camera-type eye development	26	0.0322	ENSP00000221930,ENSP00000222462,ENSP00000245451,ENSP00000261483,ENSP00000263577,ENSP00000264634,ENSP00000265354,ENSP00000265602,ENSP00000285018,ENSP00000295728,ENSP00000299293,ENSP00000307342,ENSP00000308610,ENSP00000308887,ENSP00000332256,ENSP00000347444,ENSP00000351905,ENSP00000354218,ENSP00000354607,ENSP00000362777,ENSP00000367797,ENSP00000369320,ENSP00000371070,ENSP00000374309,ENSP00000385571…	AHI1,ALDH1A3,ATOH7,ATP8A2,BMP4,CDON,CRYBA2,FRS2,FZD5,GPD2,HCN1,HIPK2,LAMA1,MAN2A1,PAX2,PPP1R13L,RS1,SKI,SRF,TDRD7,TGFB1,TGFBR2,WNT16,WNT5A,WNT5B,WNT7A
GO.0051239	regulation of multicellular organismal process	122	0.0322	ENSP00000001008,ENSP00000078429,ENSP00000080059,ENSP00000167106,ENSP00000217372,ENSP00000221930,ENSP00000222330,ENSP00000225792,ENSP00000227163,ENSP00000228347,ENSP00000228682,ENSP00000232424,ENSP00000233202,ENSP00000233954,ENSP00000234961,ENSP00000241274,ENSP00000245451,ENSP00000252456,ENSP00000252595,ENSP00000258411,ENSP00000258729,ENSP00000259808,ENSP00000261483,ENSP00000262659,ENSP00000262992…	ABAT,ABCG8,ADAMTS18,ADCYAP1,ADRA1A,AHI1,ANKH,ATP8A2,BMP4,CACNA1A,CAV3,CBLB,CCM2L,CDH2,CDK5RAP1,CDKL5,CDON,CLIC2,CLU,CNN1,CTNNA1,CTR9,CYP2J2,DBC1,DDX5,DDX58,DRD2,DUSP6,EDN1,EPB49,EPHX2,FBLN1,FBXO31,FGF8,FKBP4,FNIP1,FOXO4,FRS2,FXYD1,FZD5,GAMT,GDF7,GDF9,GLI1,GLS,GNA11,GRM1,GSK3A,GSTO1,GUCY1A3,HAX1,HDAC7,HES1,HIPK2,HOXD13,IGF1,IGF2BP3,IKBKG,IL17RA,IL1RL1,ILK,INHBB,INPP4B,IQGAP3,IRF5,IRG1,KBTBD10,KCTD…
GO.0002072	optic cup morphogenesis involved in camera-type eye development	4	0.0384	ENSP00000222462,ENSP00000264634,ENSP00000332256,ENSP00000396259	ALDH1A3,PAX2,WNT16,WNT5A
GO.0051338	regulation of transferase activity	56	0.0393	ENSP00000158166,ENSP00000217372,ENSP00000221930,ENSP00000222330,ENSP00000228307,ENSP00000229812,ENSP00000233202,ENSP00000239223,ENSP00000245451,ENSP00000245960,ENSP00000247207,ENSP00000252595,ENSP00000259607,ENSP00000259808,ENSP00000260404,ENSP00000263574,ENSP00000264634,ENSP00000264717,ENSP00000265026,ENSP00000276014,ENSP00000279488,ENSP00000280154,ENSP00000282753,ENSP00000299421,ENSP00000310841…	ADCY4,ADCY5,ADCYAP1,APLP2,BMP4,CAMKK1,CAV3,CCL21,CCNB3,CDC14B,CDC25B,CDK5RAP1,CLSPN,CLU,CUL1,DRD2,DUSP1,DUSP6,EDN1,ERRFI1,FBXO31,FGFR1OP,FZD5,GCKR,GRM1,GSK3A,HSPA2,ILK,IQGAP3,MAP3K13,MAP3K6,NRG1,NTF3,P2RX7,PAK4,PAK6,PDCD4,PIFO,PRKAA1,PTPN2,PXN,RIPK1,SBK2,SH3BP5L,SLC11A1,SLC27A1,SOCS2,STK38,TGFB1,TGFB2,TGFBR2,UBE2I,WNT5A,ZAK,ZGPAT,ZP3
GO.0043933	macromolecular complex subunit organization	111	0.0403	ENSP00000001008,ENSP00000080059,ENSP00000167588,ENSP00000215904,ENSP00000216027,ENSP00000217133,ENSP00000221930,ENSP00000227163,ENSP00000228307,ENSP00000232424,ENSP00000251582,ENSP00000253108,ENSP00000256996,ENSP00000258123,ENSP00000261017,ENSP00000261497,ENSP00000262640,ENSP00000263181,ENSP00000263578,ENSP00000264808,ENSP00000264883,ENSP00000264995,ENSP00000265354,ENSP00000265800,ENSP00000265825…	AASS,ABI2,ADAMTS2,ARHGAP6,ARID5B,AURKB,BAHD1,BAIAP2L2,BCS1L,CAV3,CBX4,CDA,CDC45,CDH2,CENPP,CHD1L,CLU,COG4,COL6A1,CTNNA1,CTR9,DDB2,DHRS4,DNAH1,EHD1,EIF2C3,EIF3G,EPB49,FCHO2,FKBP4,FOXRED1,FSCN3,GLS,GPX3,HAUS7,HDAC7,HDAC8,HES1,HJURP,HSCB,ILK,KCND3,KCNS1,KCTD7,KIAA1383,KIF18A,KRT20,KRT71,LPL,LRRC16A,MICU1,MRPL10,MRPL22,MRPL23,MRPL3,MRPL50,MRPS22,MRPS34,MTA3,NAP1L4,NRG1,NUP54,OTX2,PDXP,PER1,PEX5,PHF15…
GO.0032270	positive regulation of cellular protein metabolic process	75	0.0406	ENSP00000158166,ENSP00000200453,ENSP00000221665,ENSP00000221930,ENSP00000222330,ENSP00000222462,ENSP00000228307,ENSP00000229268,ENSP00000232424,ENSP00000233202,ENSP00000234961,ENSP00000245960,ENSP00000247207,ENSP00000252595,ENSP00000254661,ENSP00000254806,ENSP00000256078,ENSP00000259607,ENSP00000259808,ENSP00000260404,ENSP00000263253,ENSP00000263577,ENSP00000264634,ENSP00000265026,ENSP00000269141…	ADCY4,ADCY5,ADCYAP1,ADRA1A,ALOX15,CAMKK1,CAV3,CCL21,CDC14B,CDC25B,CDH2,CDK5R2,CDON,CHP2,CLSPN,CLU,CTR9,CUL1,DRD2,EBAG9,EDN1,EP300,FAM59A,FBLN1,FIZ1,FNIP1,FZD5,GCFC1,GDF7,GDF9,GRM1,GSK3A,HAX1,HES1,HIPK2,HSPA2,IFNE,IGF1,ILK,INHBB,IQGAP3,ITGA5,KRAS,MAP3K13,MAP3K6,MID1,NRG1,NTF3,OPRD1,P2RX7,PAK4,PAK6,PICALM,PPP1R15A,PRKAA1,PXN,RAMP1,RIPK1,RUVBL2,SBK2,SH3D19,SLC11A1,SLC27A1,TERF2IP,TGFB1,TGFB2,TGFBR2,…
GO.0009653	anatomical structure morphogenesis	110	0.0413	ENSP00000080059,ENSP00000167106,ENSP00000217244,ENSP00000221930,ENSP00000222145,ENSP00000222330,ENSP00000222462,ENSP00000227163,ENSP00000228307,ENSP00000228682,ENSP00000232424,ENSP00000239223,ENSP00000241274,ENSP00000242067,ENSP00000245451,ENSP00000248572,ENSP00000254661,ENSP00000254799,ENSP00000256178,ENSP00000258411,ENSP00000258729,ENSP00000261483,ENSP00000262461,ENSP00000262659,ENSP00000263253…	AHI1,AK7,ARID5B,ATOH1,ATP8A2,BBS9,BMP4,BSX,CA9,CACNA1A,CACNA1I,CACNB3,CAV3,CCDC176,CCM2L,CDH2,CDK5R2,CDON,CLU,COL25A1,COL6A1,CSNK2A1,CTNNA1,CTNNA2,CUL1,DNAH1,DRD2,DUSP1,EDN1,EP300,ERRFI1,EVC,FGF8,FOXK1,FOXO4,FRMD6,FRS2,FZD5,GAMT,GDF7,GLI1,GNGT1,GPI,GRSF1,GSK3A,HCN1,HDAC7,HES1,HIPK2,HNRNPAB,HOXA4,HOXD13,IGF1,IGF2BP3,IQUB,ITGA5,KLF7,KRT71,LHX8,LYVE1,MAN2A1,MYOF,NEDD4,NRG1,P2RX7,PAX2,PICALM,POU3F4,P…
GO.0016049	cell growth	14	0.0421	ENSP00000221930,ENSP00000225792,ENSP00000283027,ENSP00000296875,ENSP00000341940,ENSP00000351049,ENSP00000351905,ENSP00000353362,ENSP00000355896,ENSP00000366396,ENSP00000368683,ENSP00000369960,ENSP00000370330,ENSP00000465742	ADRA1A,CACNA1A,CAV3,DDX5,EDN1,ERBB2IP,GDF9,NUBP1,PAK4,RASGRP4,TGFB1,TGFB2,TGFBR2,XRN2
GO.0032147	activation of protein kinase activity	26	0.0421	ENSP00000158166,ENSP00000228307,ENSP00000233202,ENSP00000245451,ENSP00000256078,ENSP00000259808,ENSP00000260404,ENSP00000264634,ENSP00000265026,ENSP00000282753,ENSP00000304250,ENSP00000312126,ENSP00000312995,ENSP00000345044,ENSP00000346148,ENSP00000349275,ENSP00000350195,ENSP00000351049,ENSP00000351905,ENSP00000354451,ENSP00000354859,ENSP00000355896,ENSP00000364361,ENSP00000397297,ENSP00000419361…	ADCY4,ADCY5,BMP4,CAMKK1,CDK5R2,CLSPN,DRD2,GRM1,IQGAP3,KRAS,MAP3K13,MAP3K6,NRG1,NTF3,P2RX7,PAK4,PAK6,PRKAA1,PXN,RIPK1,SBK2,SLC11A1,TGFB2,TGFBR2,WNT5A,ZAK
GO.0043412	macromolecule modification	140	0.0421	ENSP00000001008,ENSP00000080059,ENSP00000158166,ENSP00000169298,ENSP00000180173,ENSP00000202625,ENSP00000215904,ENSP00000217244,ENSP00000217372,ENSP00000217961,ENSP00000221930,ENSP00000222120,ENSP00000222330,ENSP00000227163,ENSP00000228307,ENSP00000229268,ENSP00000229812,ENSP00000231368,ENSP00000233944,ENSP00000234179,ENSP00000245451,ENSP00000245960,ENSP00000250156,ENSP00000250617,ENSP00000255108…	ABI2,ADAMTS13,AKT3,ALKBH4,ANAPC16,ARHGEF6,ARSG,ART5,ASB10,ASCC2,AURKB,BHMT,BMP4,CAMKK1,CBLB,CBX4,CDC14B,CDC25B,CDC42BPG,CDK17,CDK5RAP1,CDKL5,CLSPN,CSNK2A1,CTR9,DCAF11,DDB2,DPH2,DUSP6,EOGT,EVPL,EXOSC6,FBXL6,FBXO31,FGF8,FGFR1OP,FKBP4,FTSJ3,FYB,GALNT13,GDF7,GMCL1,GRK7,GSK3A,HDAC7,HDAC8,HIPK2,IGF1,IKBKG,IQGAP3,KBTBD10,KCTD7,KLHL15,KLHL25,KLHL9,KRAS,LCK,LNPEP,MAN1A2,MAN2B1,MAP3K13,MAP3K6,MED7,MRM1,MTM…
GO.0048762	mesenchymal cell differentiation	14	0.0421	ENSP00000221930,ENSP00000222462,ENSP00000232424,ENSP00000245451,ENSP00000258411,ENSP00000264634,ENSP00000321797,ENSP00000345206,ENSP00000349275,ENSP00000351108,ENSP00000355896,ENSP00000368683,ENSP00000381739,ENSP00000396259	BMP4,EDN1,FGF8,HES1,HNRNPAB,NRG1,PAX2,RBPJ,TGFB1,TGFB2,WNT10A,WNT16,WNT5A,WNT8A
GO.0065007	biological regulation	404	0.0421	ENSP00000080059,ENSP00000158166,ENSP00000167106,ENSP00000167588,ENSP00000206423,ENSP00000215530,ENSP00000215727,ENSP00000215742,ENSP00000215904,ENSP00000216185,ENSP00000217244,ENSP00000217372,ENSP00000217961,ENSP00000219593,ENSP00000221466,ENSP00000221665,ENSP00000221930,ENSP00000222120,ENSP00000222145,ENSP00000222219,ENSP00000222330,ENSP00000222462,ENSP00000222792,ENSP00000223210,ENSP00000224073…	ABCG8,ABI2,ABI3,ACTR5,ADAMTS13,ADAMTS18,ADC,ADCYAP1,ADORA2A,ADRA1A,AGAP3,AGPAT9,AHI1,AKT3,ALKBH4,AMPD3,ANKAR,ANKH,ANKRD33,ARF3,ARFIP2,ARHGAP27,ARHGAP30,ARHGAP4,ARHGAP6,ARHGEF25,ARHGEF3,ARHGEF40,ARHGEF6,ARID3A,ASB10,ASCC2,ASIC3,ATOH7,ATP11A,AURKB,AVEN,BAHD1,BAIAP2L2,BAZ2B,BHLHA9,BHMT,BMP4,BOC,BPIFB1,BRWD3,BSX,BTBD11,CA9,CAMKK1,CAV3,CBX4,CCDC80,CCL21,CCM2L,CCNB3,CD180,CDA,CDC14B,CDC42BPG,CDC45,CDCA…
GO.0009893	positive regulation of metabolic process	168	0.0431	ENSP00000158166,ENSP00000200453,ENSP00000217244,ENSP00000218032,ENSP00000221665,ENSP00000221930,ENSP00000222330,ENSP00000222462,ENSP00000222792,ENSP00000224073,ENSP00000225792,ENSP00000227163,ENSP00000228307,ENSP00000228682,ENSP00000229268,ENSP00000232424,ENSP00000233202,ENSP00000234961,ENSP00000245451,ENSP00000245960,ENSP00000247207,ENSP00000250617,ENSP00000252595,ENSP00000254661,ENSP00000254806…	ADC,ADCY4,ADCY5,ADCYAP1,ADORA2A,ADRA1A,AGAP3,AHI1,ALOX15,ANKAR,ARHGAP27,ARHGAP30,ARHGAP4,ARHGAP6,ARHGEF25,ARHGEF3,ARHGEF40,ARHGEF6,ARID3A,ARID5B,ATOH1,BMP4,BOC,BSX,CAMKK1,CAV3,CBLB,CCL21,CDC14B,CDC25B,CDH2,CDK5R2,CDK5RAP2,CDKL5,CDON,CHN2,CHP2,CLSPN,CLU,CSNK2A1,CTR9,CUL1,CYTH3,DBF4,DDX5,DDX58,DENND4B,DENND6B,DEPDC1B,DOCK11,DRD2,EBAG9,EDF1,EDN1,EIF2B2,EP300,EPHX2,ERBB2IP,ERRFI1,FAM59A,FGF8,FIZ1,FNI…
GO.0051781	positive regulation of cell division	15	0.0431	ENSP00000221930,ENSP00000245960,ENSP00000264634,ENSP00000269209,ENSP00000302665,ENSP00000321797,ENSP00000328410,ENSP00000339730,ENSP00000354859,ENSP00000355896,ENSP00000364520,ENSP00000368683,ENSP00000376865,ENSP00000403208,ENSP00000463999	AURKB,CDC25B,DRD2,EDN1,FAM59A,FGF8,IGF1,KIAA1383,MACC1,PDGFD,TAS1R2,TGFB1,TGFB2,THBS4,WNT5A
GO.0010560	positive regulation of glycoprotein biosynthetic process	5	0.0447	ENSP00000254661,ENSP00000259607,ENSP00000263253,ENSP00000302665,ENSP00000356591	CCL21,EP300,IGF1,RAMP1,SOAT1
GO.0016202	regulation of striated muscle tissue development	13	0.0447	ENSP00000221930,ENSP00000222330,ENSP00000225792,ENSP00000245451,ENSP00000263577,ENSP00000284669,ENSP00000321797,ENSP00000341940,ENSP00000345206,ENSP00000346148,ENSP00000349275,ENSP00000351905,ENSP00000362778	BMP4,CAV3,CDON,DDX5,FGF8,GSK3A,KBTBD10,NRG1,PI16,PRKAA1,RBPJ,TGFB1,TGFBR2
GO.1903533	regulation of protein targeting	25	0.0447	ENSP00000221930,ENSP00000222330,ENSP00000232424,ENSP00000245451,ENSP00000261574,ENSP00000262640,ENSP00000263253,ENSP00000265800,ENSP00000280097,ENSP00000300113,ENSP00000302665,ENSP00000310193,ENSP00000310447,ENSP00000325618,ENSP00000326550,ENSP00000327124,ENSP00000329002,ENSP00000338030,ENSP00000349275,ENSP00000354607,ENSP00000358857,ENSP00000360464,ENSP00000369213,ENSP00000371936,ENSP00000439856	BMP4,CHERP,CHP2,DDX58,EMD,EP300,EPB49,FZD5,GLS2,GSK3A,HAX1,HES1,HNMT,IGF1,IPO5,NKAP,NRG1,PARP10,SEMA5A,SMCR7L,STARD7,TACC3,TBC1D10C,TGFB1,VAMP7
GO.0003002	regionalization	27	0.0448	ENSP00000228682,ENSP00000232424,ENSP00000245451,ENSP00000254799,ENSP00000263253,ENSP00000263577,ENSP00000264634,ENSP00000265354,ENSP00000265602,ENSP00000279386,ENSP00000279488,ENSP00000285018,ENSP00000299293,ENSP00000312624,ENSP00000321797,ENSP00000323584,ENSP00000345206,ENSP00000350552,ENSP00000354607,ENSP00000356480,ENSP00000367797,ENSP00000368683,ENSP00000369695,ENSP00000376322,ENSP00000381739…	AHI1,BMP4,CDON,DUSP6,EDN1,EP300,FGF8,FRS2,FZD5,GLI1,GRSF1,HES1,HIPK2,HOXD13,MLLT3,PAX2,RBPJ,RFX4,RNF2,SKI,SRF,TBX6,TCAP,TSHZ1,WNT5A,WNT7A,WNT8A
GO.0008150	biological_process	508	0.0464	ENSP00000080059,ENSP00000167106,ENSP00000169298,ENSP00000187762,ENSP00000206423,ENSP00000206542,ENSP00000210633,ENSP00000215530,ENSP00000215727,ENSP00000215742,ENSP00000215904,ENSP00000217244,ENSP00000219593,ENSP00000221455,ENSP00000221466,ENSP00000221554,ENSP00000221665,ENSP00000221930,ENSP00000222145,ENSP00000222330,ENSP00000222462,ENSP00000222792,ENSP00000223167,ENSP00000223210,ENSP00000224073…	AASS,ABCG8,ABHD13,ABI2,ABI3,ACADSB,ACTR1A,ACTR5,ADAM19,ADAMTS10,ADC,ADCY4,ADCYAP1,ADORA2A,ADPGK,ADRA1A,AGAP3,AGPAT9,AJAP1,AKT3,ALKBH4,ANAPC16,ANGPTL2,ANKAR,ANKH,ANO5,ARFIP2,ARHGAP27,ARHGAP30,ARHGAP4,ARHGAP6,ARHGEF25,ARHGEF3,ARHGEF40,ARHGEF6,ARID3A,ARSG,ART5,ASB10,ASCC2,ASMTL,ATP11A,ATP13A1,ATP2C2,AURKB,AVEN,BAHD1,BAIAP2L2,BAZ2B,BBS9,BCS1L,BHLHA9,BHMT,BICD2,BMP4,BOC,BPIFB1,BRWD3,BSX,BTBD11,C16orf6…
GO.0035556	intracellular signal transduction	98	0.0464	ENSP00000200453,ENSP00000215530,ENSP00000218032,ENSP00000221930,ENSP00000222120,ENSP00000222330,ENSP00000222792,ENSP00000225688,ENSP00000225792,ENSP00000229340,ENSP00000229812,ENSP00000232424,ENSP00000233944,ENSP00000233954,ENSP00000234179,ENSP00000239223,ENSP00000250617,ENSP00000252455,ENSP00000254584,ENSP00000256078,ENSP00000256682,ENSP00000259075,ENSP00000259808,ENSP00000260404,ENSP00000261017…	ABI2,ADCY4,ADCY5,ADRA1A,AGAP3,AKR1B1,ARF3,ARFIP2,ARHGAP30,ARHGAP4,ARHGAP6,ARHGEF3,ARHGEF6,ASB10,AURKB,CBLB,CDC42BPG,CDCA8,CENPP,CHN2,CLIC2,CLU,CTNNA1,CTR9,CUL1,DDX5,DDX58,DEPDC1B,DOCK11,DRD2,DUSP1,DUSP6,EDN1,EIF2C3,EPB49,FGF22,FNIP1,FOXO4,FRS2,FYB,GPR155,GSK3A,GSTO1,GUCY1A3,HES1,HIPK2,IGF1,IL1RL1,ILK,KIF18A,KRAS,LCK,MAP3K13,MAP3K6,NDRG1,NUF2,PAK4,PAK6,PAX2,PPP1R15A,PRC1,PRKAA1,PRKAG3,PRKCSH,PRKD3…
GO.0007389	pattern specification process	32	0.0488	ENSP00000227163,ENSP00000228682,ENSP00000232424,ENSP00000245451,ENSP00000254799,ENSP00000263253,ENSP00000263577,ENSP00000264634,ENSP00000265354,ENSP00000265602,ENSP00000279386,ENSP00000279488,ENSP00000285018,ENSP00000299293,ENSP00000312624,ENSP00000312678,ENSP00000321797,ENSP00000323584,ENSP00000345206,ENSP00000350552,ENSP00000351905,ENSP00000354607,ENSP00000356480,ENSP00000367797,ENSP00000368683…	AHI1,BMP4,CDON,DUSP6,EDN1,EP300,FGF8,FRS2,FZD5,GLI1,GRSF1,HES1,HIPK2,HOXD13,MDGA2,MID1,MLLT3,PAX2,RBPJ,RFX4,RNF2,SEMA5A,SKI,SPI1,SRF,TBX6,TCAP,TGFBR2,TSHZ1,WNT5A,WNT7A,WNT8A
GO.0009966	regulation of signal transduction	122	0.05	ENSP00000080059,ENSP00000200453,ENSP00000217244,ENSP00000221930,ENSP00000222330,ENSP00000222462,ENSP00000222792,ENSP00000225792,ENSP00000228682,ENSP00000229812,ENSP00000233954,ENSP00000245414,ENSP00000245451,ENSP00000248572,ENSP00000250617,ENSP00000253354,ENSP00000254661,ENSP00000255175,ENSP00000256447,ENSP00000257572,ENSP00000258123,ENSP00000259607,ENSP00000259808,ENSP00000260404,ENSP00000262992…	ADCYAP1,ADRA1A,AGPAT9,AKR1B1,ALOX15,APLP2,ARHGAP30,ARHGAP4,ARHGAP6,ARHGEF3,ARHGEF6,BMP4,BPIFB1,CAV3,CBLB,CCL21,CD180,CDH2,CDKN2AIP,CDON,CHN2,CHP2,CLU,CSNK2A1,CTNNA1,DDX5,DENND4B,DEPDC1B,DRD2,DUSP6,EDN1,EMD,EP300,EPB49,ERBB2IP,EVC,FAM59A,FBLN1,FGFBP3,FNIP1,GDF7,GDF9,GLI1,GNGT1,GRK7,GRM1,GSK3A,HAX1,HDAC7,HIPK2,HRK,IGF1,IL1RL1,INPP4B,IQGAP3,IRF1,IRG1,ITGA5,KCTD7,MAP3K13,MAP3K6,MARVELD3,MID1,MLLT3,MO…

## Sheet: Downregulated-BiologicalProcess
Pathway ID	Pathway description	observed gene count	false discovery rate	matching proteins in your network (IDs)	matching proteins in your network (labels)
GO.0007275	multicellular organismal development	159	0.0191	ENSP00000000442,ENSP00000162023,ENSP00000188790,ENSP00000206513,ENSP00000216211,ENSP00000221855,ENSP00000223366,ENSP00000225916,ENSP00000228284,ENSP00000228606,ENSP00000230658,ENSP00000231461,ENSP00000238081,ENSP00000239449,ENSP00000240328,ENSP00000244769,ENSP00000248420,ENSP00000249373,ENSP00000253303,ENSP00000256398,ENSP00000257430,ENSP00000258443,ENSP00000258873,ENSP00000260502,ENSP00000260950…	ACSBG1,ADAMTS4,ADRB2,ADRBK1,ALAS2,ALDOB,ANK3,ANKS1A,APC,ARPC2,ASB2,ASPH,ASTN1,ATCAY,ATXN1,BBS7,BCAR3,BCL11B,BMP1,BTD,C12orf52,C14orf39,C6orf70,CACTIN,CCHCR1,CCSAP,CD109,CD86,CDH1,CDK5RAP3,CDKL1,CEBPE,CNN2,CR2,CSNK2A2,CSPG5,CTC1,CUL5,CYLC1,CYP27B1,CYP46A1,DDX41,DGKG,DHH,DLG4,DMRTA1,DNAH11,DONSON,EDAR,EIF4ENIF1,ELP3,EPHA10,ESRRA,FAM101A,FAP,FASN,FOSL1,FOXL1,GCK,GIMAP1,GLIS2,GNPAT,GPR161,GPRIN1,GZF1…
GO.0032502	developmental process	174	0.0306	ENSP00000000442,ENSP00000162023,ENSP00000188790,ENSP00000206513,ENSP00000221855,ENSP00000223366,ENSP00000225899,ENSP00000225916,ENSP00000228284,ENSP00000228606,ENSP00000230658,ENSP00000231461,ENSP00000238081,ENSP00000239449,ENSP00000240328,ENSP00000242591,ENSP00000244426,ENSP00000244769,ENSP00000248420,ENSP00000249373,ENSP00000250495,ENSP00000253303,ENSP00000256398,ENSP00000257430,ENSP00000258873…	ACSBG1,ADAMTS4,ADRB2,ADRBK1,ALAS2,ALDOB,ANK3,ANKS1A,APC,ARPC2,ASB2,ASPH,ASTN1,ATCAY,ATXN1,BBS7,BCAR3,BCL11B,BMP1,BTD,C12orf52,C14orf39,C6orf70,CACTIN,CASR,CCHCR1,CCSAP,CD109,CD86,CDH1,CDK5RAP3,CDKL1,CEBPE,CEP250,CNN2,CR2,CSNK2A2,CSPG5,CTBP1,CTC1,CUL5,CYLC1,CYP27B1,CYP46A1,DAPL1,DDX41,DGKG,DHH,DLG4,DNAH11,DONSON,EIF4ENIF1,ELP3,EPHA10,ESRRA,FAM101A,FAP,FBXO9,FERMT2,FOSL1,FOXL1,FZD1,GCK,GIMAP1,GLIS2…
GO.0009214	cyclic nucleotide catabolic process	6	0.0339	ENSP00000282096,ENSP00000286063,ENSP00000334910,ENSP00000347689,ENSP00000351957,ENSP00000377470	CNP,PDE11A,PDE2A,PDE3A,PDE3B,PDE4C

## Sheet: Upregulated-KEGG
Pathway ID	Pathway description	observed gene count	false discovery rate	matching proteins in your network (IDs)	matching proteins in your network (labels)
4010	MAPK signaling pathway	24	0.0194	ENSP00000215530,ENSP00000221930,ENSP00000233946,ENSP00000239223,ENSP00000245960,ENSP00000247207,ENSP00000263826,ENSP00000265026,ENSP00000265354,ENSP00000270517,ENSP00000279488,ENSP00000301050,ENSP00000321797,ENSP00000350195,ENSP00000351905,ENSP00000353362,ENSP00000355896,ENSP00000358622,ENSP00000364361,ENSP00000364805,ENSP00000385019,ENSP00000397297,ENSP00000410452,ENSP00000465742	AKT3,CACNA1A,CACNA1I,CACNB3,CDC25B,DUSP1,DUSP6,ECSIT,FGF22,FGF8,HSPA1L,HSPA2,IKBKG,IL1R1,MAP3K13,MAP3K6,NTF3,RASGRP4,SRF,STMN1,TGFB1,TGFB2,TGFBR2,ZAK
5205	Proteoglycans in cancer	22	0.0194	ENSP00000215530,ENSP00000221930,ENSP00000222462,ENSP00000225792,ENSP00000228307,ENSP00000258411,ENSP00000263826,ENSP00000264122,ENSP00000264634,ENSP00000280154,ENSP00000285018,ENSP00000286827,ENSP00000293379,ENSP00000299293,ENSP00000302665,ENSP00000308887,ENSP00000321797,ENSP00000341940,ENSP00000354607,ENSP00000355896,ENSP00000369757,ENSP00000381739	AKT3,CAV3,CBLB,DDX5,FGF22,FGF8,FRS2,FZD5,IGF1,ITGA5,PDCD4,PXN,RPS6,TGFB1,TGFB2,TIAM1,WNT10A,WNT16,WNT5A,WNT5B,WNT7A,WNT8A
561	Glycerolipid metabolism	9	0.0237	ENSP00000228027,ENSP00000261596,ENSP00000264409,ENSP00000285930,ENSP00000309757,ENSP00000310551,ENSP00000337463,ENSP00000352547,ENSP00000378360	AGPAT1,AGPAT9,AKR1B1,DAK,DGAT2,GPAT2,LCLAT1,LPIN2,LPL
5200	Pathways in cancer	27	0.0237	ENSP00000215530,ENSP00000221930,ENSP00000222462,ENSP00000227163,ENSP00000228682,ENSP00000230538,ENSP00000245451,ENSP00000258411,ENSP00000263253,ENSP00000263826,ENSP00000264122,ENSP00000264634,ENSP00000285018,ENSP00000302665,ENSP00000304669,ENSP00000308887,ENSP00000309181,ENSP00000321797,ENSP00000347443,ENSP00000351905,ENSP00000354607,ENSP00000355896,ENSP00000358622,ENSP00000374309,ENSP00000381739…	AKT3,BMP4,CBLB,CCNE2,CSF2RA,CTNNA1,CTNNA2,EP300,FGF22,FGF8,FZD5,GLI1,IGF1,IKBKG,LAMA1,LAMA4,RASSF5,SPI1,TGFB1,TGFB2,TGFBR2,WNT10A,WNT16,WNT5A,WNT5B,WNT7A,WNT8A
5217	Basal cell carcinoma	9	0.0237	ENSP00000222462,ENSP00000228682,ENSP00000245451,ENSP00000258411,ENSP00000264634,ENSP00000285018,ENSP00000308887,ENSP00000354607,ENSP00000381739	BMP4,FZD5,GLI1,WNT10A,WNT16,WNT5A,WNT5B,WNT7A,WNT8A
4727	GABAergic synapse	11	0.03	ENSP00000248572,ENSP00000254488,ENSP00000265294,ENSP00000268251,ENSP00000295452,ENSP00000312126,ENSP00000317379,ENSP00000353362,ENSP00000366233,ENSP00000386029,ENSP00000419361	ABAT,ADCY4,ADCY5,CACNA1A,GABBR1,GABRG1,GABRP,GABRR2,GLS,GNGT1,SLC6A11
4340	Hedgehog signaling pathway	8	0.0402	ENSP00000222462,ENSP00000228682,ENSP00000245451,ENSP00000258411,ENSP00000264634,ENSP00000285018,ENSP00000308887,ENSP00000381739	BMP4,GLI1,WNT10A,WNT16,WNT5A,WNT5B,WNT7A,WNT8A
4390	Hippo signaling pathway	15	0.0405	ENSP00000221930,ENSP00000222462,ENSP00000245451,ENSP00000258411,ENSP00000264634,ENSP00000272224,ENSP00000285018,ENSP00000304669,ENSP00000308887,ENSP00000348550,ENSP00000351905,ENSP00000354607,ENSP00000355896,ENSP00000381739,ENSP00000418191	BMP4,CTNNA1,CTNNA2,FRMD6,FZD5,GDF7,TGFB1,TGFB2,TGFBR2,WNT10A,WNT16,WNT5A,WNT5B,WNT7A,WNT8A
