# Supplementary material for: Transcriptional Repression of MFG-E8 Causes Disturbance in the Homeostasis of Cell Cycle Through DOCK/ZP4/STAT Signaling in Buffalo Mammary Epithelial Cells
Source: Front Cell Dev Biol. 2021 Apr 1;9:568660. doi: 10.3389/fcell.2021.568660 (PMC8047144; doi:10.3389/fcell.2021.568660)
Supplement: Supplementary Table 7 — The determined information for the targets of TFs identified associated proteins in MFGE8 downstream signaling. [file Table_7.XLSX]

## Sheet: Sheet1
	Targets of Transcription factors identified associated proteins in MFGE8 dowstream signaling
Transcription factors	FOXF2	HDAC2	FOXA1	JUN	TFDP3	POU2F1	SNAI2	NFYA	ZNF652	CHD2	MEF2A	GATA2
	PPM1D	NBR1	SYNPO	SYNPO	SYNPO	SYNPO	CAB39L	ARHGAP6	AASS	ABAT	ACSBG1	ABAT
	MTRF1L	DEK	ATP2A3	TMEM40	ZCWPW1	OLA1	CBX6	ARHGEF5	ABCG8	ABCC10	ADAMTS18	ABCA3
	UHRF2	ZNF367	BTD	RUNX2	CDC20B	FAM122A	CDH18	BAZ2B	ABHD4	ACADSB	ADCYAP1	ABI3
	SLC12A6	STX16	FDFT1	TRIML2	TSHZ2	TSHZ2	DCLK1	BCL11B	ABI2	ADAMTS2	ADRB2	ACBD3
	STX16	NDE1	NBR1	FOSL1	CORO6	RUNX2	EDAR	BMP4	ADAMTS10	ADAP1	AKT3	ADCYAP1
	BACH2	ENC1	CNP	NLRX1	THUMPD2	PDE11A	FOXL1	CDH20	ADORA2A	ADORA2A	ALDOB	ADRA1A
	ENC1	TMEM181	DEK	ENC1	BMP1	SLC12A6	INA	CDK17	ALDOB	ADSS	ALPK2	ADRB2
	SLC7A8	PXMP4	GJA3	CD109	RUNX2	BCL11B	KLHDC9	CDKL5	ALPK2	AKT3	AMPD1	ADSS
	CD109	AGBL5	SLC12A6	LRRC25	UHRF2	PIPOX	MPP7	CHST8	ALPL	ALPL	ANKH	AKT3
	IL21	QKI	BACH2	CPA5	GJA3	ST8SIA4	NOTCH2	CLOCK	ALX1	ARF3	ANO5	ALDH1A3
	RIBC2	TDRD7	ANK3	PLEKHM1	ZNF367	BACH2	NRIP1	CTBP1	ANGPTL2	ARHGAP6	APLP2	ALDOB
	EDAR	CLU	FOXA1	TRIM2	BCL11B	TWF1	OR10J1	DDX5	ANK3	ASB2	APOBEC2	ALG9
	OR10J1	HES1	SELENBP1	ARID5B	CLOCK	ANK3	PDE11A	DRD2	ANKH	ASPH	ARHGAP6	ALPK2
	ISCA1	HNMT	ZDHHC16	CLU	BACH2	UPK3A	PDE3A	DSE	ANXA11	BAHD1	ARHGEF33	ALX1
	SERINC3	ABI2	TPP1	CDH2	SMOC1	MTA2	PFKP	DUSP6	APLP2	BCL11B	ASB10	AMPD3
	CSNK2A1	TLK2	GEM	MON1A	CD86	NDE1	PLIN1	ENC1	ARF3	BEAN1	ASPH	ANK3
	NDRG1	WBP2	RIBC2	CLPB	NDE1	ENC1	PRELP	FAM124A	ARID5B	BMP1	ATP2A3	APOBEC2
	KCNJ15	NADK	UBXN1	SERPIND1	NHLRC2	CSRNP2	RASA3	FERMT2	ARPC2	C14orf39	ATP8A2	ARF3
	FRS2	CDK5RAP2	EDAR	TLK2	DAPL1	SLC7A8	RBFOX3	FRMD6	ATP13A4	C2CD4A	ATXN1	ARHGAP27
	GRIK3	FZD5	SERINC3	IQUB	IDH3A	GPR161	SLC12A6	GNAL	ATP8A2	CAB39L	BACH2	ARHGAP6
	PER1	SNX25	ARID5B	TMPRSS3	SSBP3	PLA2G7	SNAI2	GPR135	ATXN1	CASC4	BAZ2B	ARID5B
	RASD1	IGF2BP3	CLU	AKR1B1	GPD2	M6PR	SYT1	GPR160	BACH2	CBX4	BHMT	ASB2
	IGF2BP3	PPP1R3E	FAM167A	USP15	SLC39A1	PNOC	TRPM1	GRIK3	BAHD1	CBX6	C10orf71	ASXL2
	FGFBP3	CYP4V2	PPP1R15A	WSB2	HES1	DAPL1		GRM1	BAIAP2L2	CCDC130	C17orf53	ATXN1
	ZNF438	HRK	SLC39A1	AHI1	EHD1	GADD45A		ITM2B	BAZ2B	CCT6A	CAB39L	BAHD1
	ARHGAP6	FLOT1	NDRG1	KLF7	GABRP	PALM2		KLF7	BCL11B	CDC14B	CACNA1A	BAZ2B
	PDPR	ERRFI1	HES1	HIP1R	CACNB3	CADM2		KLHL18	BMP4	CDC25B	CADM2	BCAR3
	TRPC4	PDCD4	ANKRD22	P2RX7	CD82	IL21		LOXL2	BNC1	CDH2	CBLB	BCL11B
	ADCYAP1	ZAK	FCHO2	HIPK2	KCNJ15	RAB28		LRTM2	BTBD11	CDK5R2	CBLN4	BMP4
	BMP4	AHI1	UEVLD	TFE3	ADCY4	LRRC25		MAMLD1	BTD	CDT1	CBX6	BNC1
	RHOBTB1	GSTO1	KCNJ15	ECSIT	CLSPN	CPA5		MAP3K1	CACNA1A	CENPV	CCDC155	BOC
	FRMD6	SKI	FAM129B	KBTBD10	GRIK3	CAB39L		MKL2	CACNB3	CETN2	CCDC57	BRWD3
	SEMA4G	ARHGEF40	PER1	CDKN2AIP	MAG	AGBL5		MLLT3	CADM2	CHD2	CCDC80	C10orf71
	ZAK	CBX4	DHX8	PAQR8	FZD5	EDAR		MRPL23	CASR	CHST7	CD109	C1RL
	WNT5A	ZNF217	CDK5RAP2	ANKRD33	IGF2BP3	TRIM2		MYBL1	CCDC120	CLSTN2	CD180	C1orf186
	KLF7	DUSP1	PLEKHH2	CDKL5	TFDP3	TDRD7		NEDD4	CCDC80	CLU	CD86	CAB39L
	BAZ2B	SLC6A11	FER1L5	PLTP	SMG7	AASS		NFYA	CD300LB	CNN1	CDC14B	CAMKK1
	TMTC2	EBAG9	MACC1	NRG1	KLHL15	ARID5B		NUFIP2	CD86	CNTROB	CDC20B	CBLB
	PSD3	PAQR8	KLHL15	ZP3	PAK4	STRBP		OTX2	CDC42BPA	COASY	CDC25B	CCDC153
	NEDD4	CDC14B	CTSF	GOLM1	DUT	MON1A		PAX2	CDH1	COL6A1	CDC42BPA	CD180
	XRN2	DGAT2	LGALS8	IGF1	MCM3	ABI3		PDCD11	CDH18	COX11	CDH18	CD86
	ZFHX4	ARID3A	RGS7	FAM126A	RGS7	CD82		PDE11A	CDH2	COX7C	CDH2	CDH18
	KCND3	NEDD4L	BMP4	TGFBR2	PDPR	LBR		PHF12	CDH20	CUL3	CDH20	CDH20
	TIAM1	GAMT	RHOBTB1	KCTD7	SLC1A3	PBK		PIGQ	CDKL5	CUL5	CDK5RAP1	CDKL5
	MID1	ARHGEF3	TRIM31	CAV3	TRPC4	PIM2		PIGR	CDKN2AIP	CWH43	CDKL5	CDON
	CBX4	RIPK1	WDR20	CNN1	BMP4	FRS2		PNOC	CDON	CYP2J2	CDON	CEBPE
	CHN2	IRF1	KLF7	CCDC124	RHOBTB1	PTPRS		PPARGC1A	CHST8	DCAF11	CEACAM16	CHN2
	ZSCAN21	TXNDC11	TMTC2	PDE2A	HSPA2	PHEX		PPP1R12B	CLSTN2	DDX11	CHN2	CHRNB4
	CTNNA2	DCAF11	MAP3K13	PADI1	ZAK	GRIK3		RBM39	CLU	DDX5	CHST6	CLASRP
	BAHD1	RRM2	ZNF233	GCK	WNT5A	PLEKHH2		RFWD3	CNP	DDX50	CLOCK	COL25A1
	RASGEF1B	TUBB1	ARHGAP27	RUNX1	HNRNPA3	REN		RHOBTB1	CNTN1	DHRS7B	CNN1	CPSF2
	MYOZ2	TRIM40	LNPEP	ATXN1	BAZ2B	ZNF438		RUNX1	COL5A2	DIRAS2	CNTN1	CSNK2A1
	BSX	GOLM1	NCKAP5L	DNAJC25	SH3D19	NETO2		RUNX2	CWH43	DOCK11	CORO6	CSRNP2
	GALNT13	FBXO31	TCL1B	TMC5	ZFHX4	ARHGAP6		SEMA5A	CYP2R1	DOHH	CTNNA2	DCLK1
	DCAF11	TGFBR2	RAB8B	JUN	LNPEP	C10orf71		SHROOM1	CYTH3	DUSP1	CTSS	DDX47
	AKT3	DUSP6	MID1	GBP2	CHSY3	TSHZ1		SLC16A2	DAPL1	ECSIT	CWH43	DENND4B
	SPAM1	SOCS2	CBX4	EEF1A2	THOC2	DUT		SLC38A1	DBF4	EHD1	CYP2R1	DEPDC1B
	HNRNPF	IL1R1	SLA	RTN4	BHLHA9	RGS7		SPRY1	DCLK1	EIF2B2	CYP46A1	DGKG
	IFNE	VEZF1	KLHL18	YWHAG	RAB35	SLC1A3		ST6GAL1	DFNB59	EIF5	CYP7A1	DOCK11
	BOC	ELOVL2	PAQR8	YWHAQ	MID1	ADAMTS2		TEF	DHH	EMD	CYTIP	DRD2
	SLC16A2	CYP27A1	NKAP		CBX4	NEUROD2		TRPC4	DHX8	ERRFI1	DAPL1	DSE
	FOXF2	NKD1	ARID3A		ECSIT	OGDHL		TSHZ2	DLG4	EVC	DCLK1	EDAR
	SNAP91	TINAGL1	CHST7		RBPJ	EFHD2		VPS45	DRD2	FAM122A	DEK	EDN1
	ATXN1	ATXN1	NEDD4L		GRM1	BMP4		YWHAQ	DSE	FAM126A	DENND4B	EEA1
	N4BP2	TBX2	ZNF239		GPAT2	HNRNPAB		ZBTB40	DYTN	FAM167A	DGKG	EFHD2
	PRDM1	CCDC57	CYP4X1		ZSCAN21	TLR8		ZFHX4	EDAR	FASN	DGKH	EHD1
	GON4L	NR1H4	TYW1		BAHD1	RHOBTB1		ZNF644	EEF1A2	FBXL6	DHX8	EML6
	PPP1R12B	ITIH2	LCLAT1		SLITRK3	CCDC80		ZSCAN21	EMD	FBXO39	DNAJB4	EP300
	SLC13A2	FERMT2	EDN1		LPCAT4	FRMD6			EML6	FDFT1	DOCK11	ESRRA
	UQCRC2	NEK10	ZNF408		CDK17	PICALM			ENC1	FGF8	DRD2	FAM110B
	CDH18	CDT1	ARHGEF6		CHST8	HSPA2			EPDR1	FLYWCH2	DSE	FAM122A
	RFX8	RTN4	RNF130		NEDD4L	PRKD3			ERRFI1	FOXK1	EBAG9	FAM167A
	HIPK3	TBC1D16	GPR160		CYP4X1	HCN1			EVPL	FOXL1	ECSIT	FAR1
		HDAC2	TANK		PAX2	RNF157			FAM110B	FZD1	EDAR	FERMT2
		KLF16	DCAF11		HOXA4	KLF7			FAM124A	GABBR1	EDN1	FKBP4
		TBC1D4	INHBB		BSX	BAZ2B			FAM167A	GADD45A	EEF1A2	FRS2
		CDH1	ACOX3		IRF1	POU2F1			FAR1	GALNT13	EFHD2	FYB
			GOLM1		CEACAM16	POU3F4			FCGRT	GDI2	EMD	GATA2
			IGF1		LCLAT1	LAMA1			FERMT2	GIPC1	EML6	GDF7
			FBXO31		LAPTM5	CYP2R1			FIZ1	GLIS2	ENC1	GLIS2
			CCNE2		IRF5	TMTC2			FKBP4	GLS	ENTPD1	GNAL
			HNRNPF		TRHDE	MAP3K13			FNDC3B	GLYR1	EPHA10	GNGT1
			TGFB2		LHX8	ST6GAL1			FOXO4	GNA11	ERRFI1	GON4L
			SPTLC2		INPP4B	MLLT3			FRMD6	GRIK5	FAM129B	GPD2
			ST6GALNAC2		CDON	ZFHX4			FRS2	GRM2	FAR1	GPR155
			DUSP6		FAR1	KCND3			GABBR1	GRSF1	FERMT2	HDAC7
			EVPL		NRG1	HIPK2			GADD45A	GSTM4	FRMD6	HEPHL1
			PRR15L		LRCH4	ARHGEF25			GDF7	GSTO2	FRS2	HIP1R
			MXD4		RRM2	LNPEP			GLI1	HES1	FUBP3	HIPK3
			GNPAT		WNT10A	TRPC7			GNAL	HNRNPAB	GABRR2	HMGCS2
			MPP7		PAN2	CBLB			GNPAT	HSPA2	GADD45A	HNMT
			BCAR3		SEMA5A	GNAL			GPD2	IKBKG	GALNT13	HNRNPUL2
			ZNF644		FIZ1	RAB8B			GPR161	IL17RA	GAN	HOXA4
			TBC1D22B		GSK3A	MID1			GRIK3	ITIH5	GCK	HOXD13
			LRRC36		EPDR1	MAMLD1			GRM1	ITM2B	GJA3	IL16
			RUNX1		IFNE	OR9G9			GSTM4	KBTBD8	GLIS2	INA
			ATXN1		HOXD13	ATP8A2			HEPHL1	KCNT1	GLS	INHBB
			DNAJC25		DUSP6	CHN2			HES1	KCTD12	GNA11	INPP4B
			APAF1		GPR155	MEF2A			HIP1R	KCTD7	GNPAT	INPP5D
			SPIN4		RASSF5	FAM110B			HIPK2	KHSRP	GPAM	IPP
			SPRY1		THTPA	VPS8			HIPK3	KLF16	GPD2	IRF1
			MOCS1		FAM124A	CDKN2AIP			HMGCS2	KLHL25	GRM1	IRF5
			NEK11		ADORA2A	LPL			HNRNPUL2	KLK10	HDAC7	ITGA2B
			NEBL		SOCS2	CTNNA2			HOOK2	LAPTM5	HIP1R	ITGA5
			FBXL18		MAN1A2	ART5			HOXA4	LENG1	HIPK3	ITIH5
			KAT2A		DRD2	CDC14B			HRK	LNPEP	HMGCS2	ITM2B
			SLC38A1		VRK1	SLITRK3			HUNK	LRCH4	HNMT	KCNH7
			TBC1D16		ZNF644	VASH1			IL16	LRRC45	HNRNPF	KCNJ15
			DCLK2		POPDC2	MYBL1			ILDR2	LTV1	HOXA4	KCTD12
			ESRRA		DGKG	CDK17			INA	MAFG	HRK	KLF16
			IARS2		PGLYRP2	MDGA2			INPP4B	MAG	HUNK	KLF7
			CDH1		PRDM1	ANKH			ISL1	MAN2A1	IFT81	KLHL15
					DTL	CHST8			ITGA5	MCOLN2	IGF2BP3	KLHL25
					NOTCH2	NEDD4L			JAKMIP2	MED7	ILDR2	KRAS
					LCP1	CAMKK1			KBTBD8	MKL2	INA	LAMA4
					KCNT2	ANO5			KCND3	MOSPD2	INHBB	LAPTM5
					JAKMIP2	ZNF239			KCNJ9	MRPL20	INPP4B	LCLAT1
					SYT1	TAS1R2			KCNT2	MTRF1L	IRF1	LCP1
					CDH18	SMYD3			KIAA1024	MXD1	IRF5	LHX8
					ISL1	PAX2			KLHDC8A	MXD4	ITM2B	LOXL2
					SIX6	HOXA4			KRT20	MYH14	IVNS1ABP	LPCAT4
					RFX8	MYOZ2			LAMA1	MYL10	KBTBD10	LRCH1
					CNTLN	CDKL5			LCP1	NCOA2	KCNH7	LRTM2
					C14orf39	ARHGAP4			LRCH1	NEBL	KCNJ15	MAMLD1
					NCOA2	LCLAT1			LRRC36	NEDD4	KCNJ9	MAN1A2
					CDT1	ANAPC16			MAP3K1	NEK10	KDM1A	MAP3K1
					PRKCE	TRHDE			MED13	NETO2	KLF7	MDGA2
					ASTN1	GALNT13			MEF2A	NEUROG1	KLHL15	MID1
					WDR86	INPP4B			MID1	NF2	KLHL25	MKL2
					SLC38A1	CDON			MKL2	NKAP	KLHL9	MSTN
					HIPK3	FAR1			MLLT3	NOTCH2	KRAS	MYCT1
					NUFIP2	CD180			MOCS1	NSDHL	KRT20	NBR1
					ASXL2	NRG1			MOSPD2	NUP107	LAMA4	NCOA2
					NRIP1	ITGA5			MSTN	OGFR	LAPTM5	NEDD4
					YWHAQ	AKT3			MTA2	OLA1	LCK	NEDD4L
					NEUROG1	LRCH4			MUC15	PDPK1	LCLAT1	NEUROD2
					TXLNB	TLL1			NAT6	PDPR	LCP1	NOTCH2
					ALPK2	SPAM1			NBEAL1	PDXP	LPCAT4	NR1H4
					FNDC3B	SRF			NCOA2	PER1	LPO	NRG1
					PCDH10	PXN			NEBL	PHF20L1	LRRC18	NRIP1
						TUBB1			NEDD4L	PLCB3	MAN1A2	NTF3
						EGFL6			NHLRC2	PLEKHH2	MDGA2	NTN5
						PAN2			NNT	PNN	MED7	NUFIP2
						TMEFF2			NRG1	POU2F1	MEF2A	OR10J1
						FANK1			NTF3	PPP1R15A	MID1	ORC4
						ZNF697			NTN5	PRKACA	MLLT3	OVGP1
						OTX2			ORC4	PRKCE	MPP7	PALM2
						IGFBPL1			PAK4	PRPF8	MTA2	PAN2
						NUP54			PAQR8	PSPH	MYOZ2	PAQR8
						MRPL23			PAX2	PWWP2B	NEBL	PBK
						DUSP6			PDE2A	PXMP4	NEDD4	PDE11A
						KLHDC8A			PDK2	QKI	NEDD4L	PDE2A
						AMPD3			PER1	RAB35	NHLH2	PDE3A
						GPR155			PHF12	RAB8A	NRG1	PLCB3
						RASSF5			PIGR	RBM39	NTF3	PLEKHM1
						CDC25B			PITPNM1	RBPJ	OGDHL	PMFBP1
						CA9			PKP3	RCOR2	OR9G9	PNOC
						ADORA2A			POU3F4	RFWD3	ORC4	POU3F4
						COL25A1			PPARGC1A	RFX4	OSBPL10	PRDM1
						ZBTB5			PPM1D	RGN	PALM2	PRKACA
						SOCS2			PPP1R12B	RHPN1	PAQR8	PRKCSH
						MAN1A2			PRDM1	RIBC2	PDE11A	PRKD3
						ITM2B			PRR15L	RPS6	PDE2A	PURB
						DRD2			PTPRS	RRM2	PDE3A	PXN
						CHD2			PURB	RTN4	PDE4C	RAB35
						GNPAT			PXN	RUNDC3B	PDGFD	RAB8A
						MPP7			RAD54L	RUNX1	PDPK1	RASA1
						PDE2A			RASA1	SDHAF1	PDPR	RASA3
						ADRB2			RASSF5	SEC62	PEX5	RASGEF1B
						CNTN1			RBM39	SERINC3	PHF20L1	RASGRP4
						ORC4			RGS6	SF1	PICALM	RBM39
						BCAR3			RHOBTB1	SHPRH	PIGR	RFX4
						ZNF644			RSU1	SKI	PLEKHH2	RFX8
						NKD1			RTN4	SLC12A2	POU2F1	RGS7
						SNAP91			RUNX2	SLC25A11	PPARGC1A	RHOBTB1
						LAMC2			S1PR1	SLC25A39	PPP1R12B	RIPK1
						MAP3K1			SEMA4G	SLC26A7	PRDM1	RNF220
						GRM2			SEMA5A	SMURF2	PRELP	RTN4
						RUNX1			SH3D19	SNAP91	PRKACA	RUNX1
						ATXN1			SHC3	SPI1	PRKCE	RUNX2
						SMG1			SHPRH	SREK1	PURB	SH3D19
						TMC5			SLC12A2	STAB1	RASA1	SHROOM1
						NOTCH2			SLC13A2	STARD7	RASA3	SIPA1L1
						MED13			SLC16A2	STT3A	RASGEF1B	SLC12A6
						LCP1			SLC22A12	STX5	RASSF5	SLC43A2
						ZFR			SLC25A39	SYN1	RCOR2	SLC44A1
						KCNH7			SLC30A1	SYT1	REN	SLC7A8
						KCNT2			SLC35F3	TACC3	RFX4	SLC9A4
						PPP1R12B			SLC7A8	TBC1D22B	RFX5	SMG7
						KCTD12			SNAP91	TBCB	RHOBTB1	SMYD3
						JAKMIP2			SOHLH2	TCEA2	RNF157	SOX8
						OMG			SREK1	TGFBR2	RNF2	SPI1
						SLC13A2			SSBP3	THAP7	RP9	SRF
						UQCRC2			ST6GAL1	TIAM1	RS1	ST6GAL1
						SYT1			STMN1	TIPIN	RTN4	STRBP
						CDH18			SYNPO	TLK2	RUNX1	STRN4
						TEKT4			SYT1	TMCO1	S1PR1	SYNPO
						UBE3A			TBX2	TMEM79	S1PR3	TANK
						ITIH2			TBX6	TOP2B	SEMA5A	TBX2
						ISL1			TCEA3	TP73	SHPRH	TCP1
						FERMT2			TDRD7	TRAF2	SIPA1L1	TDRD7
						NCOA2			TEF	TRAFD1	SIX6	TGFB2
						BARD1			TGFB2	TRPV3	SLC16A2	TGFBR2
						NEBL			THUMPD2	TSHZ2	SLC6A11	TLK2
						RPS6KA4			TINAGL1	TUBGCP5	SLC7A8	TMTC2
						APC			TLL1	TYW1	SLITRK3	TRHDE
						HIPK3			TMTC2	UBE2I	SNX22	TSHZ1
						ITIH5			TRHDE	UCK2	SPI1	TSHZ2
						IVNS1ABP			TRPM1	UHRF2	SRF	TWF1
						ALX1			TSHZ1	USP22	ST6GAL1	UBE3A
						FAM101A			TSHZ2	VEZT	STK38	UNC5A
						KRT35			TWF1	VPS13C	STRBP	VEZF1
						NEUROG1			UCK2	VRK1	STT3A	VRK1
						ALG9			UNC93A	WDR19	STX17	WNT10A
						NNT			UQCRC2	WDR73	SYNPO	WNT5A
						MTMR9			USP50	WHAMM	SYT1	ZAK
						DCLK2			VRK1	WNT7A	TANK	ZBTB40
						ESRRA			WIZ	YWHAQ	TBC1D4	ZC3H12D
						PDE3A			WNT5A	ZBTB4	TCEA3	ZFHX4
						ALPK2			YWHAQ	ZCCHC14	TDRD10	ZFR
						MEF2B			ZAK	ZDHHC20	TDRD7	ZNF217
									ZBTB4	ZMYM3	TLL1	ZNF280D
									ZBTB40		TMEFF2	ZNF408
									ZC3H12D		TMTC2	ZNF438
									ZFHX4		TRHDE	ZNF609
									ZKSCAN4		TRIM72	ZNF644
									ZNF367		TRPC7
									ZNF644		TRPV3
									ZNF652		UBE3A
									ZNF697		USP15
									ZNF804B		WHAMM
									ZSCAN21		WIZ
											WNT5A
											WNT5B
											ZAK
											ZBTB40
											ZC3H12D
											ZCCHC14
											ZNF217
											ZNF438
											ZNF652
											ZNF804B
											ZSCAN21
