# Supplementary material for: Transcriptional Repression of MFG-E8 Causes Disturbance in the Homeostasis of Cell Cycle Through DOCK/ZP4/STAT Signaling in Buffalo Mammary Epithelial Cells
Source: Front Cell Dev Biol. 2021 Apr 1;9:568660. doi: 10.3389/fcell.2021.568660 (PMC8047144; doi:10.3389/fcell.2021.568660)
Supplement: Supplementary Table 8 — Information on miRNA target proteins and interaction analysis for all the associated proteins involved in network construction. [file Table_8.XLSX]

## Sheet: mirnmfge8 default  node
SUID	% Associated Genes	% Common Gene	%Genes Cluster #	All Associated Genes	Associated Genes Found	CEREBRAL_DOWNSTRAM_INFO	CEREBRAL_DOWNSTRAM_INFO_ALL	CEREBRAL_LOCALIZATION_INFO	CEREBRAL_LOCALIZATION_INFO_ALL	Cluster	Common Genes	ENSEMBL_GENE_ID	GOGroups	GOID	GOLevels	GOTerm	Group PValue	name	Nr. Genes	Ontology Source	OverViewTerm	selected	shared name	Term PValue	UniProtKB_AC	UNIQUE_ID
88								1.Extracellular	1.Extracellular, 2.Plasma Membrane, 3.Intra Cellular, 5.Nucleus			ENSG00000113552	ASSOCIATED_GENE	GNPDA1		GNPDA1		10007			ASSOCIATED_GENE	FALSE	10007		[P46926]	10007
89								0.Annotation definition not found in 'Homo Sapiens.properties' file	0.Annotation definition not found in 'Homo Sapiens.properties' file				ASSOCIATED_GENE	ACE3P		ACE3P		100129123			ASSOCIATED_GENE	FALSE	100129123			100129123
90								0.Annotation definition not found in 'Homo Sapiens.properties' file	0.Annotation definition not found in 'Homo Sapiens.properties' file			ENSG00000214694	ASSOCIATED_GENE	ARHGEF33		ARHGEF33		100271715			ASSOCIATED_GENE	FALSE	100271715		[A8MVX0]	100271715
91								3.Intra Cellular	3.Intra Cellular, 5.Nucleus			ENSG00000129484	ASSOCIATED_GENE	PARP2		PARP2		10038			ASSOCIATED_GENE	FALSE	10038		[Q9UGN5]	10038
92								3.Intra Cellular	3.Intra Cellular, 5.Nucleus			ENSG00000105993	ASSOCIATED_GENE	DNAJB6		DNAJB6		10049			ASSOCIATED_GENE	FALSE	10049		[A0A0J9YX62, E9PH18, O75190]	10049
93								0.Annotation definition not found in 'Homo Sapiens.properties' file	0.Annotation definition not found in 'Homo Sapiens.properties' file			ENSG00000108825	ASSOCIATED_GENE	PTGES3L-AARSD1		PTGES3L-AARSD1		100885850			ASSOCIATED_GENE	FALSE	100885850		[Q9BTE6]	100885850
94								3.Intra Cellular	3.Intra Cellular			ENSG00000137394	ASSOCIATED_GENE	TRIM10		TRIM10		10107			ASSOCIATED_GENE	FALSE	10107		[A0A1U9X8M5, Q9UDY6]	10107
95								1.Extracellular	1.Extracellular, 2.Plasma Membrane, 3.Intra Cellular			ENSG00000163466	ASSOCIATED_GENE	ARPC2		ARPC2		10109			ASSOCIATED_GENE	FALSE	10109		[A0A024R408, O15144, Q53R19]	10109
96								3.Intra Cellular	3.Intra Cellular, 5.Nucleus			ENSG00000110422	ASSOCIATED_GENE	HIPK3		HIPK3		10114			ASSOCIATED_GENE	FALSE	10114		[A8KAE4, Q9H422]	10114
97								1.Extracellular	1.Extracellular, 2.Plasma Membrane, 3.Intra Cellular			ENSG00000129910	ASSOCIATED_GENE	CDH15		CDH15		1013			ASSOCIATED_GENE	FALSE	1013		[P55291]	1013
98								3.Intra Cellular	3.Intra Cellular, 5.Nucleus			ENSG00000064607	ASSOCIATED_GENE	SUGP2		SUGP2		10147			ASSOCIATED_GENE	FALSE	10147		[A8K5G0, M0R2Z9, Q8IX01]	10147
99								2.Plasma Membrane	2.Plasma Membrane			ENSG00000145526	ASSOCIATED_GENE	CDH18		CDH18		1016			ASSOCIATED_GENE	FALSE	1016		[D6RER2, Q13634]	1016
100								3.Intra Cellular	3.Intra Cellular			ENSG00000120896	ASSOCIATED_GENE	SORBS3		SORBS3		10174			ASSOCIATED_GENE	FALSE	10174		[O60504]	10174
101								3.Intra Cellular	3.Intra Cellular			ENSG00000179981	ASSOCIATED_GENE	TSHZ1		TSHZ1		10194			ASSOCIATED_GENE	FALSE	10194		[A7YF73, Q6ZSZ6]	10194
102								2.Plasma Membrane	2.Plasma Membrane, 3.Intra Cellular			ENSG00000068831	ASSOCIATED_GENE	RASGRP2		RASGRP2		10235			ASSOCIATED_GENE	FALSE	10235		[B3KV60, Q7LDG7]	10235
103								3.Intra Cellular	3.Intra Cellular, 5.Nucleus			ENSG00000136807	ASSOCIATED_GENE	CDK9		CDK9		1025			ASSOCIATED_GENE	FALSE	1025		[A0A024R880, P50750]	1025
104								2.Plasma Membrane	2.Plasma Membrane, 3.Intra Cellular, 5.Nucleus			ENSG00000164056	ASSOCIATED_GENE	SPRY1		SPRY1		10252			ASSOCIATED_GENE	FALSE	10252		[O43609]	10252
105								3.Intra Cellular	3.Intra Cellular			ENSG00000072195	ASSOCIATED_GENE	SPEG		SPEG		10290			ASSOCIATED_GENE	FALSE	10290		[Q15772]	10290
106								2.Plasma Membrane	2.Plasma Membrane, 3.Intra Cellular			ENSG00000140854	ASSOCIATED_GENE	KATNB1		KATNB1		10300			ASSOCIATED_GENE	FALSE	10300		[Q9BVA0]	10300
107								3.Intra Cellular	3.Intra Cellular, 5.Nucleus			ENSG00000145901	ASSOCIATED_GENE	TNIP1		TNIP1		10318			ASSOCIATED_GENE	FALSE	10318		[A0A0A0MRZ4, A8K4N4, B7Z8K2, Q15025]	10318
108								1.Extracellular	1.Extracellular			ENSG00000050555	ASSOCIATED_GENE	LAMC3		LAMC3		10319			ASSOCIATED_GENE	FALSE	10319		[Q8N2D6, Q9Y6N6]	10319
109								1.Extracellular	1.Extracellular, 2.Plasma Membrane, 3.Intra Cellular			ENSG00000164741	ASSOCIATED_GENE	DLC1		DLC1		10395			ASSOCIATED_GENE	FALSE	10395		[A8K119, Q96QB1]	10395
110								1.Extracellular	1.Extracellular, 2.Plasma Membrane, 3.Intra Cellular, 5.Nucleus			ENSG00000176788	ASSOCIATED_GENE	BASP1		BASP1		10409			ASSOCIATED_GENE	FALSE	10409		[P80723]	10409
111								3.Intra Cellular	3.Intra Cellular			ENSG00000126216	ASSOCIATED_GENE	TUBGCP3		TUBGCP3		10426			ASSOCIATED_GENE	FALSE	10426		[A0A087WU06, B4DYP7, Q96CW5]	10426
112						Transcription Factor Complex	Transcription Factor Complex	2.Plasma Membrane	2.Plasma Membrane, 3.Intra Cellular, 4.Nuclear Membrane, 5.Nucleus			ENSG00000143575	ASSOCIATED_GENE	HAX1		HAX1		10456			ASSOCIATED_GENE	FALSE	10456		[A0A0S2Z565, A0A0S2Z591, O00165]	10456
113								3.Intra Cellular	3.Intra Cellular, 5.Nucleus			ENSG00000116670	ASSOCIATED_GENE	MAD2L2		MAD2L2		10459			ASSOCIATED_GENE	FALSE	10459		[A0A024R4I4, Q9UI95]	10459
114								1.Extracellular	1.Extracellular, 3.Intra Cellular, 5.Nucleus			ENSG00000083535	ASSOCIATED_GENE	PIBF1		PIBF1		10464			ASSOCIATED_GENE	FALSE	10464		[Q8WXW3]	10464
115								3.Intra Cellular	3.Intra Cellular			ENSG00000104980	ASSOCIATED_GENE	TIMM44		TIMM44		10469			ASSOCIATED_GENE	FALSE	10469		[O43615]	10469
116								2.Plasma Membrane	2.Plasma Membrane			ENSG00000143434	ASSOCIATED_GENE	SEMA6C		SEMA6C		10500			ASSOCIATED_GENE	FALSE	10500		[Q9H3T2]	10500
117								1.Extracellular	1.Extracellular, 2.Plasma Membrane, 3.Intra Cellular, 5.Nucleus			ENSG00000085872	ASSOCIATED_GENE	CHERP		CHERP		10523			ASSOCIATED_GENE	FALSE	10523		[Q8IWX8]	10523
118								1.Extracellular	1.Extracellular, 3.Intra Cellular			ENSG00000078114	ASSOCIATED_GENE	NEBL		NEBL		10529			ASSOCIATED_GENE	FALSE	10529		[O76041, Q59FZ8]	10529
119								3.Intra Cellular	3.Intra Cellular, 5.Nucleus			ENSG00000092067	ASSOCIATED_GENE	CEBPE		CEBPE		1053			ASSOCIATED_GENE	FALSE	1053		[Q15744]	1053
120								3.Intra Cellular	3.Intra Cellular			ENSG00000111254	ASSOCIATED_GENE	AKAP3		AKAP3		10566			ASSOCIATED_GENE	FALSE	10566		[O75969, V9HWD4]	10566
121								2.Plasma Membrane	2.Plasma Membrane, 3.Intra Cellular, 5.Nucleus			ENSG00000095637	ASSOCIATED_GENE	SORBS1		SORBS1		10580			ASSOCIATED_GENE	FALSE	10580		[B4DTX5, Q9BX66]	10580
122						Transcription Factor Complex	Transcription Factor Complex	3.Intra Cellular	3.Intra Cellular, 5.Nucleus			ENSG00000116679	ASSOCIATED_GENE	IVNS1ABP		IVNS1ABP		10625			ASSOCIATED_GENE	FALSE	10625		[Q9Y6Y0]	10625
123								3.Intra Cellular	3.Intra Cellular, 5.Nucleus			ENSG00000117724	ASSOCIATED_GENE	CENPF		CENPF		1063			ASSOCIATED_GENE	FALSE	1063		[P49454]	1063
124								3.Intra Cellular	3.Intra Cellular, 5.Nucleus			ENSG00000136231	ASSOCIATED_GENE	IGF2BP3		IGF2BP3		10643			ASSOCIATED_GENE	FALSE	10643		[O00425]	10643
125								3.Intra Cellular	3.Intra Cellular, 5.Nucleus			ENSG00000240694	ASSOCIATED_GENE	PNMA2		PNMA2		10687			ASSOCIATED_GENE	FALSE	10687		[Q5U5Z3, Q9UL42]	10687
126								3.Intra Cellular	3.Intra Cellular, 5.Nucleus			ENSG00000147400	ASSOCIATED_GENE	CETN2		CETN2		1069			ASSOCIATED_GENE	FALSE	1069		[P41208]	1069
127								1.Extracellular	1.Extracellular, 3.Intra Cellular, 5.Nucleus			ENSG00000066923	ASSOCIATED_GENE	STAG3		STAG3		10734			ASSOCIATED_GENE	FALSE	10734		[D6W5U7, Q9UJ98]	10734
128								1.Extracellular	1.Extracellular, 3.Intra Cellular			ENSG00000123159	ASSOCIATED_GENE	GIPC1		GIPC1		10755			ASSOCIATED_GENE	FALSE	10755		[A0A024R7I0, A0A024R7I1, A8K2I7, O14908]	10755
129								3.Intra Cellular	3.Intra Cellular			ENSG00000172995	ASSOCIATED_GENE	ARPP21		ARPP21		10777			ASSOCIATED_GENE	FALSE	10777		[A8K0T4, A8K1F3, Q9UBL0]	10777
130								1.Extracellular	1.Extracellular, 2.Plasma Membrane, 3.Intra Cellular			ENSG00000001626	ASSOCIATED_GENE	CFTR		CFTR		1080			ASSOCIATED_GENE	FALSE	1080		[A0A024R730, P13569]	1080
131								2.Plasma Membrane	2.Plasma Membrane			ENSG00000137218	ASSOCIATED_GENE	FRS3		FRS3		10817			ASSOCIATED_GENE	FALSE	10817		[A0A140VJJ7, O43559]	10817
132								1.Extracellular	1.Extracellular, 2.Plasma Membrane, 3.Intra Cellular			ENSG00000042980	ASSOCIATED_GENE	ADAM28		ADAM28		10863			ASSOCIATED_GENE	FALSE	10863		[Q9UKQ2]	10863
133								2.Plasma Membrane	2.Plasma Membrane, 3.Intra Cellular			ENSG00000172046	ASSOCIATED_GENE	USP19		USP19		10869			ASSOCIATED_GENE	FALSE	10869		[O94966]	10869
134								3.Intra Cellular	3.Intra Cellular, 5.Nucleus			ENSG00000006634	ASSOCIATED_GENE	DBF4		DBF4		10926			ASSOCIATED_GENE	FALSE	10926		[B4DXK0, B7Z8C6, Q9UBU7]	10926
135								3.Intra Cellular	3.Intra Cellular			ENSG00000017797	ASSOCIATED_GENE	RALBP1		RALBP1		10928			ASSOCIATED_GENE	FALSE	10928		[Q15311]	10928
136								1.Extracellular	1.Extracellular, 3.Intra Cellular, 5.Nucleus			ENSG00000104356	ASSOCIATED_GENE	POP1		POP1		10940			ASSOCIATED_GENE	FALSE	10940		[Q96F88, Q99575]	10940
137								3.Intra Cellular	3.Intra Cellular, 5.Nucleus			ENSG00000117395	ASSOCIATED_GENE	EBNA1BP2		EBNA1BP2		10969			ASSOCIATED_GENE	FALSE	10969		[H7C2Q8, Q6IB29, Q99848]	10969
138								1.Extracellular	1.Extracellular, 3.Intra Cellular			ENSG00000134308	ASSOCIATED_GENE	YWHAQ		YWHAQ		10971			ASSOCIATED_GENE	FALSE	10971		[P27348]	10971
139								2.Plasma Membrane	2.Plasma Membrane, 3.Intra Cellular			ENSG00000132305	ASSOCIATED_GENE	IMMT		IMMT		10989			ASSOCIATED_GENE	FALSE	10989		[Q16891]	10989
140								2.Plasma Membrane	2.Plasma Membrane, 3.Intra Cellular			ENSG00000083807	ASSOCIATED_GENE	SLC27A5		SLC27A5		10998			ASSOCIATED_GENE	FALSE	10998		[Q9Y2P5]	10998
141								3.Intra Cellular	3.Intra Cellular, 5.Nucleus			ENSG00000142945	ASSOCIATED_GENE	KIF2C		KIF2C		11004			ASSOCIATED_GENE	FALSE	11004		[A0A140VKF1, B7Z6Q6, B7Z7M6, Q99661]	11004
142								3.Intra Cellular	3.Intra Cellular			ENSG00000146872	ASSOCIATED_GENE	TLK2		TLK2		11011			ASSOCIATED_GENE	FALSE	11011		[B4DUC2, J3QLK5, Q86UE8]	11011
143								3.Intra Cellular	3.Intra Cellular			ENSG00000070748	ASSOCIATED_GENE	CHAT		CHAT		1103			ASSOCIATED_GENE	FALSE	1103		[D3DX95, P28329, Q6LEN5, Q6LEN6]	1103
144								2.Plasma Membrane	2.Plasma Membrane, 3.Intra Cellular			ENSG00000105963	ASSOCIATED_GENE	ADAP1		ADAP1		11033			ASSOCIATED_GENE	FALSE	11033		[A8K3A2, B4DUZ7, O75689]	11033
145								1.Extracellular	1.Extracellular, 2.Plasma Membrane, 3.Intra Cellular			ENSG00000174684	ASSOCIATED_GENE	B4GAT1		B4GAT1		11041			ASSOCIATED_GENE	FALSE	11041		[A0A024R5F9, O43505]	11041
146								3.Intra Cellular	3.Intra Cellular			ENSG00000060491	ASSOCIATED_GENE	OGFR		OGFR		11054			ASSOCIATED_GENE	FALSE	11054		[Q9NZT2]	11054
147								2.Plasma Membrane	2.Plasma Membrane			ENSG00000114395	ASSOCIATED_GENE	CYB561D2		CYB561D2		11068			ASSOCIATED_GENE	TRUE	11068		[A0A024R342, O14569]	11068
148								3.Intra Cellular	3.Intra Cellular			ENSG00000137397	ASSOCIATED_GENE	TRIM31		TRIM31		11074			ASSOCIATED_GENE	FALSE	11074		[Q2L6J1, Q9BZY9]	11074
149								1.Extracellular	1.Extracellular, 2.Plasma Membrane, 3.Intra Cellular			ENSG00000162616	ASSOCIATED_GENE	DNAJB4		DNAJB4		11080			ASSOCIATED_GENE	FALSE	11080		[B4DNN2, Q9UDY4]	11080
150								3.Intra Cellular	3.Intra Cellular, 5.Nucleus			ENSG00000138738	ASSOCIATED_GENE	PRDM5		PRDM5		11107			ASSOCIATED_GENE	FALSE	11107		[Q9NQX1]	11107
151								3.Intra Cellular	3.Intra Cellular			ENSG00000104859	ASSOCIATED_GENE	CLASRP		CLASRP		11129			ASSOCIATED_GENE	FALSE	11129		[A0A0A0MQS2, Q8N2M8]	11129
152								3.Intra Cellular	3.Intra Cellular			ENSG00000137225	ASSOCIATED_GENE	CAPN11		CAPN11		11131			ASSOCIATED_GENE	FALSE	11131		[Q9UMQ6]	11131
153								1.Extracellular	1.Extracellular, 2.Plasma Membrane, 3.Intra Cellular			ENSG00000102879	ASSOCIATED_GENE	CORO1A		CORO1A		11151			ASSOCIATED_GENE	FALSE	11151		[A0A024R611, P31146]	11151
154								3.Intra Cellular	3.Intra Cellular			ENSG00000122367	ASSOCIATED_GENE	LDB3		LDB3		11155			ASSOCIATED_GENE	FALSE	11155		[A0A0S2Z501, A0A0S2Z530, O75112, V5T7C5]	11155
155								3.Intra Cellular	3.Intra Cellular			ENSG00000109511	ASSOCIATED_GENE	ANXA10		ANXA10		11199			ASSOCIATED_GENE	FALSE	11199		[Q9UJ72]	11199
156								0.Annotation definition not found in 'Homo Sapiens.properties' file	0.Annotation definition not found in 'Homo Sapiens.properties' file			ENSG00000196678	ASSOCIATED_GENE	ERI2		ERI2		112479			ASSOCIATED_GENE	FALSE	112479		[A8K979]	112479
157								2.Plasma Membrane	2.Plasma Membrane			ENSG00000101180	ASSOCIATED_GENE	HRH3		HRH3		11255			ASSOCIATED_GENE	FALSE	11255		[Q9Y5N1]	11255
158								1.Extracellular	1.Extracellular, 3.Intra Cellular, 4.Nuclear Membrane, 5.Nucleus			ENSG00000157349	ASSOCIATED_GENE	DDX19B		DDX19B		11269			ASSOCIATED_GENE	FALSE	11269		[A0A024QZ90, A0A0U4B4U6, B4DL69, H3BQK0, Q9UMR2]	11269
159								0.Annotation definition not found in 'Homo Sapiens.properties' file	0.Annotation definition not found in 'Homo Sapiens.properties' file			ENSG00000140006	ASSOCIATED_GENE	WDR89		WDR89		112840			ASSOCIATED_GENE	FALSE	112840		[A0A024R667, Q96FK6]	112840
160								2.Plasma Membrane	2.Plasma Membrane, 3.Intra Cellular			ENSG00000161714	ASSOCIATED_GENE	PLCD3		PLCD3		113026			ASSOCIATED_GENE	FALSE	113026		[Q8N3E9]	113026
161								2.Plasma Membrane	2.Plasma Membrane			ENSG00000170175	ASSOCIATED_GENE	CHRNB1		CHRNB1		1140			ASSOCIATED_GENE	FALSE	1140		[P11230]	1140
162								1.Extracellular	1.Extracellular, 2.Plasma Membrane, 3.Intra Cellular			ENSG00000169258	ASSOCIATED_GENE	GPRIN1		GPRIN1		114787			ASSOCIATED_GENE	FALSE	114787		[Q7Z2K8]	114787
163								1.Extracellular	1.Extracellular, 3.Intra Cellular			ENSG00000144589	ASSOCIATED_GENE	STK11IP		STK11IP		114790			ASSOCIATED_GENE	FALSE	114790		[C9JQV3, Q8N1F8]	114790
164								3.Intra Cellular	3.Intra Cellular			ENSG00000141576	ASSOCIATED_GENE	RNF157		RNF157		114804			ASSOCIATED_GENE	FALSE	114804		[Q96PX1]	114804
165								3.Intra Cellular	3.Intra Cellular			ENSG00000198796	ASSOCIATED_GENE	ALPK2		ALPK2		115701			ASSOCIATED_GENE	FALSE	115701		[Q86TB3]	115701
166								3.Intra Cellular	3.Intra Cellular, 5.Nucleus			ENSG00000152382	ASSOCIATED_GENE	TADA1		TADA1		117143			ASSOCIATED_GENE	FALSE	117143		[Q96BN2]	117143
167								3.Intra Cellular	3.Intra Cellular, 5.Nucleus			ENSG00000108592	ASSOCIATED_GENE	FTSJ3		FTSJ3		117246			ASSOCIATED_GENE	FALSE	117246		[Q8IY81]	117246
168								1.Extracellular	1.Extracellular			ENSG00000171136	ASSOCIATED_GENE	RLN3		RLN3		117579			ASSOCIATED_GENE	FALSE	117579		[B2RU28, K7ENX1, Q8WXF3]	117579
169								2.Plasma Membrane	2.Plasma Membrane, 3.Intra Cellular			ENSG00000103249	ASSOCIATED_GENE	CLCN7		CLCN7		1186			ASSOCIATED_GENE	FALSE	1186		[P51798]	1186
170								1.Extracellular	1.Extracellular			ENSG00000203837	ASSOCIATED_GENE	PNLIPRP3		PNLIPRP3		119548			ASSOCIATED_GENE	FALSE	119548		[Q17RR3]	119548
171								3.Intra Cellular	3.Intra Cellular, 5.Nucleus			ENSG00000176444	ASSOCIATED_GENE	CLK2		CLK2		1196			ASSOCIATED_GENE	FALSE	1196		[A8K7I0, B1AVT0, B7Z8N6, P49760]	1196
172								1.Extracellular	1.Extracellular, 3.Intra Cellular			ENSG00000166340	ASSOCIATED_GENE	TPP1		TPP1		1200			ASSOCIATED_GENE	FALSE	1200		[O14773]	1200
173								2.Plasma Membrane	2.Plasma Membrane, 3.Intra Cellular			ENSG00000175416	ASSOCIATED_GENE	CLTB		CLTB		1212			ASSOCIATED_GENE	FALSE	1212		[A0A024R7S3, B4DTF9, P09497]	1212
174								3.Intra Cellular	3.Intra Cellular, 5.Nucleus			ENSG00000189046	ASSOCIATED_GENE	ALKBH2		ALKBH2		121642			ASSOCIATED_GENE	FALSE	121642		[Q6NS38]	121642
175								2.Plasma Membrane	2.Plasma Membrane, 3.Intra Cellular			ENSG00000139926	ASSOCIATED_GENE	FRMD6		FRMD6		122786			ASSOCIATED_GENE	FALSE	122786		[Q96NE9]	122786
176								3.Intra Cellular	3.Intra Cellular			ENSG00000140044	ASSOCIATED_GENE	JDP2		JDP2		122953			ASSOCIATED_GENE	FALSE	122953		[A0A024R6D7, Q8WYK2]	122953
177								2.Plasma Membrane	2.Plasma Membrane, 3.Intra Cellular			ENSG00000171954	ASSOCIATED_GENE	CYP4F22		CYP4F22		126410			ASSOCIATED_GENE	FALSE	126410		[Q6NT55]	126410
178								0.Annotation definition not found in 'Homo Sapiens.properties' file	0.Annotation definition not found in 'Homo Sapiens.properties' file			ENSG00000179902	ASSOCIATED_GENE	C1orf194		C1orf194		127003			ASSOCIATED_GENE	FALSE	127003		[Q5T5A4]	127003
179								1.Extracellular	1.Extracellular, 3.Intra Cellular			ENSG00000164692	ASSOCIATED_GENE	COL1A2		COL1A2		1278			ASSOCIATED_GENE	FALSE	1278		[A0A0S2Z3H5, P08123]	1278
180								3.Intra Cellular	3.Intra Cellular			ENSG00000171872	ASSOCIATED_GENE	KLF17		KLF17		128209			ASSOCIATED_GENE	FALSE	128209		[Q5JT82]	128209
181								1.Extracellular	1.Extracellular, 3.Intra Cellular			ENSG00000204262	ASSOCIATED_GENE	COL5A2		COL5A2		1290			ASSOCIATED_GENE	FALSE	1290		[P05997]	1290
182								2.Plasma Membrane	2.Plasma Membrane			ENSG00000155052	ASSOCIATED_GENE	CNTNAP5		CNTNAP5		129684			ASSOCIATED_GENE	FALSE	129684		[Q8WYK1]	129684
183								1.Extracellular	1.Extracellular, 3.Intra Cellular			ENSG00000092758	ASSOCIATED_GENE	COL9A3		COL9A3		1299			ASSOCIATED_GENE	FALSE	1299		[Q14050]	1299
184								0.Annotation definition not found in 'Homo Sapiens.properties' file	0.Annotation definition not found in 'Homo Sapiens.properties' file			ENSG00000173209	ASSOCIATED_GENE	AHSA2P		AHSA2P		130872			ASSOCIATED_GENE	FALSE	130872		[Q719I0]	130872
185								2.Plasma Membrane	2.Plasma Membrane			ENSG00000114124	ASSOCIATED_GENE	GRK7		GRK7		131890			ASSOCIATED_GENE	FALSE	131890		[Q8WTQ7]	131890
186								3.Intra Cellular	3.Intra Cellular			ENSG00000168237	ASSOCIATED_GENE	GLYCTK		GLYCTK		132158			ASSOCIATED_GENE	FALSE	132158		[A0A024R302, Q8IVS8]	132158
187								2.Plasma Membrane	2.Plasma Membrane			ENSG00000205359	ASSOCIATED_GENE	SLCO6A1		SLCO6A1		133482			ASSOCIATED_GENE	FALSE	133482		[A0A140VJU7, C9J020, D3DSZ4, Q86UG4]	133482
188								3.Intra Cellular	3.Intra Cellular			ENSG00000164244	ASSOCIATED_GENE	PRRC1		PRRC1		133619			ASSOCIATED_GENE	FALSE	133619		[Q96M27]	133619
189								3.Intra Cellular	3.Intra Cellular			ENSG00000152620	ASSOCIATED_GENE	NADK2		NADK2		133686			ASSOCIATED_GENE	FALSE	133686		[A0A024R048, B7Z8V7, Q4G0N4]	133686
190								3.Intra Cellular	3.Intra Cellular, 5.Nucleus			ENSG00000155858	ASSOCIATED_GENE	LSM11		LSM11		134353			ASSOCIATED_GENE	FALSE	134353		[P83369]	134353
191								2.Plasma Membrane	2.Plasma Membrane, 3.Intra Cellular			ENSG00000127184	ASSOCIATED_GENE	COX7C		COX7C		1350			ASSOCIATED_GENE	FALSE	1350		[P15954]	1350
192								2.Plasma Membrane	2.Plasma Membrane, 3.Intra Cellular			ENSG00000112309	ASSOCIATED_GENE	B3GAT2		B3GAT2		135152			ASSOCIATED_GENE	FALSE	135152		[Q9NPZ5]	135152
193								2.Plasma Membrane	2.Plasma Membrane			ENSG00000178826	ASSOCIATED_GENE	TMEM139		TMEM139		135932			ASSOCIATED_GENE	FALSE	135932		[Q8IV31]	135932
194								3.Intra Cellular	3.Intra Cellular			ENSG00000197362	ASSOCIATED_GENE	ZNF786		ZNF786		136051			ASSOCIATED_GENE	FALSE	136051		[Q8N393]	136051
195								1.Extracellular	1.Extracellular, 2.Plasma Membrane			ENSG00000135678	ASSOCIATED_GENE	CPM		CPM		1368			ASSOCIATED_GENE	FALSE	1368		[P14384]	1368
196								1.Extracellular	1.Extracellular			ENSG00000204001	ASSOCIATED_GENE	LCN8		LCN8		138307			ASSOCIATED_GENE	FALSE	138307		[Q6JVE9, Q6ZT51, Q8NBE9]	138307
197								0.Annotation definition not found in 'Homo Sapiens.properties' file	0.Annotation definition not found in 'Homo Sapiens.properties' file			ENSG00000177689	ASSOCIATED_GENE	MAGEB10		MAGEB10		139422			ASSOCIATED_GENE	FALSE	139422		[Q96LZ2]	139422
198								3.Intra Cellular	3.Intra Cellular			ENSG00000071909	ASSOCIATED_GENE	MYO3B		MYO3B		140469			ASSOCIATED_GENE	FALSE	140469		[B7ZM71, Q8WXR4]	140469
199								0.Annotation definition not found in 'Homo Sapiens.properties' file	0.Annotation definition not found in 'Homo Sapiens.properties' file			ENSG00000130590	ASSOCIATED_GENE	SAMD10		SAMD10		140700			ASSOCIATED_GENE	FALSE	140700		[Q9BYL1]	140700
200								0.Annotation definition not found in 'Homo Sapiens.properties' file	0.Annotation definition not found in 'Homo Sapiens.properties' file			ENSG00000101331	ASSOCIATED_GENE	CCM2L		CCM2L		140706			ASSOCIATED_GENE	FALSE	140706		[Q9NUG4]	140706
201								0.Annotation definition not found in 'Homo Sapiens.properties' file	0.Annotation definition not found in 'Homo Sapiens.properties' file			ENSG00000132801	ASSOCIATED_GENE	ZSWIM3		ZSWIM3		140831			ASSOCIATED_GENE	FALSE	140831		[Q96MP5]	140831
202								0.Annotation definition not found in 'Homo Sapiens.properties' file	0.Annotation definition not found in 'Homo Sapiens.properties' file			ENSG00000100053	ASSOCIATED_GENE	CRYBB3		CRYBB3		1417			ASSOCIATED_GENE	FALSE	1417		[P26998]	1417
203								3.Intra Cellular	3.Intra Cellular, 5.Nucleus			ENSG00000166435	ASSOCIATED_GENE	XRRA1		XRRA1		143570			ASSOCIATED_GENE	FALSE	143570		[Q6P2D8, Q8TEH2]	143570
204								1.Extracellular	1.Extracellular, 2.Plasma Membrane			ENSG00000198223	ASSOCIATED_GENE	CSF2RA		CSF2RA		1438			ASSOCIATED_GENE	FALSE	1438		[P15509]	1438
205								0.Annotation definition not found in 'Homo Sapiens.properties' file	0.Annotation definition not found in 'Homo Sapiens.properties' file			ENSG00000152404	ASSOCIATED_GENE	CWF19L2		CWF19L2		143884			ASSOCIATED_GENE	FALSE	143884		[Q2TBE0]	143884
206								1.Extracellular	1.Extracellular, 3.Intra Cellular			ENSG00000151948	ASSOCIATED_GENE	GLT1D1		GLT1D1		144423			ASSOCIATED_GENE	FALSE	144423		[Q96MS3]	144423
207								1.Extracellular	1.Extracellular, 2.Plasma Membrane, 3.Intra Cellular			ENSG00000103653	ASSOCIATED_GENE	CSK		CSK		1445			ASSOCIATED_GENE	FALSE	1445		[A8K3B6, B2R6Q4, P41240]	1445
208								1.Extracellular	1.Extracellular			ENSG00000175662	ASSOCIATED_GENE	TOM1L2		TOM1L2		146691			ASSOCIATED_GENE	FALSE	146691		[B7Z2U2, B7Z671, F5H3S6, Q6ZVM7]	146691
209								0.Annotation definition not found in 'Homo Sapiens.properties' file	0.Annotation definition not found in 'Homo Sapiens.properties' file			ENSG00000240280	ASSOCIATED_GENE	TCAM1P		TCAM1P		146771			ASSOCIATED_GENE	FALSE	146771			146771
210								2.Plasma Membrane	2.Plasma Membrane, 3.Intra Cellular, 5.Nucleus			ENSG00000183048	ASSOCIATED_GENE	SLC25A10		SLC25A10		1468			ASSOCIATED_GENE	FALSE	1468		[A0A0S2Z382, A0A0S2Z3G3, B4E1E9, F6RGN5, Q9UBX3]	1468
211								2.Plasma Membrane	2.Plasma Membrane, 3.Intra Cellular			ENSG00000276231	ASSOCIATED_GENE	PIK3R6		PIK3R6		146850			ASSOCIATED_GENE	FALSE	146850		[B3KRK9, Q5UE93]	146850
212								2.Plasma Membrane	2.Plasma Membrane, 3.Intra Cellular, 4.Nuclear Membrane, 5.Nucleus			ENSG00000170214	ASSOCIATED_GENE	ADRA1B		ADRA1B		147			ASSOCIATED_GENE	FALSE	147		[P35368]	147
213								3.Intra Cellular	3.Intra Cellular			ENSG00000177045	ASSOCIATED_GENE	SIX5		SIX5		147912			ASSOCIATED_GENE	FALSE	147912		[Q8N196]	147912
214								2.Plasma Membrane	2.Plasma Membrane			ENSG00000183780	ASSOCIATED_GENE	SLC35F3		SLC35F3		148641			ASSOCIATED_GENE	FALSE	148641		[Q8IY50]	148641
215								1.Extracellular	1.Extracellular, 2.Plasma Membrane, 3.Intra Cellular			ENSG00000118523	ASSOCIATED_GENE	CTGF		CTGF		1490			ASSOCIATED_GENE	FALSE	1490		[P29279, Q5M8T4]	1490
216								1.Extracellular	1.Extracellular, 2.Plasma Membrane, 3.Intra Cellular			ENSG00000198561	ASSOCIATED_GENE	CTNND1		CTNND1		1500			ASSOCIATED_GENE	FALSE	1500		[O60716]	1500
217								3.Intra Cellular	3.Intra Cellular			ENSG00000171793	ASSOCIATED_GENE	CTPS1		CTPS1		1503			ASSOCIATED_GENE	FALSE	1503		[B4E1E0, P17812]	1503
218								2.Plasma Membrane	2.Plasma Membrane, 3.Intra Cellular			ENSG00000115841	ASSOCIATED_GENE	RMDN2		RMDN2		151393			ASSOCIATED_GENE	FALSE	151393		[A0A0C4DFM4, Q96LZ7]	151393
219								3.Intra Cellular	3.Intra Cellular, 5.Nucleus			ENSG00000129810	ASSOCIATED_GENE	SGO1		SGO1		151648			ASSOCIATED_GENE	FALSE	151648		[A0A024R2J4, B5BUA4, Q5FBB7]	151648
220								3.Intra Cellular	3.Intra Cellular			ENSG00000183035	ASSOCIATED_GENE	CYLC1		CYLC1		1538			ASSOCIATED_GENE	FALSE	1538		[A0A087WXC8, P35663, Q6PEK4]	1538
221								2.Plasma Membrane	2.Plasma Membrane, 3.Intra Cellular			ENSG00000083799	ASSOCIATED_GENE	CYLD		CYLD		1540			ASSOCIATED_GENE	FALSE	1540		[A0A024R6T1, Q9NQC7]	1540
222								0.Annotation definition not found in 'Homo Sapiens.properties' file	0.Annotation definition not found in 'Homo Sapiens.properties' file			ENSG00000164483	ASSOCIATED_GENE	SAMD3		SAMD3		154075			ASSOCIATED_GENE	FALSE	154075		[Q8N6K7]	154075
223								0.Annotation definition not found in 'Homo Sapiens.properties' file	0.Annotation definition not found in 'Homo Sapiens.properties' file			ENSG00000105784	ASSOCIATED_GENE	RUNDC3B		RUNDC3B		154661			ASSOCIATED_GENE	FALSE	154661		[Q96NL0]	154661
224								0.Annotation definition not found in 'Homo Sapiens.properties' file	0.Annotation definition not found in 'Homo Sapiens.properties' file			ENSG00000165171	ASSOCIATED_GENE	METTL27		METTL27		155368			ASSOCIATED_GENE	FALSE	155368		[Q8N6F8]	155368
225								2.Plasma Membrane	2.Plasma Membrane, 3.Intra Cellular			ENSG00000164841	ASSOCIATED_GENE	TMEM74		TMEM74		157753			ASSOCIATED_GENE	FALSE	157753		[A0A024R9D4, Q96NL1]	157753
226								3.Intra Cellular	3.Intra Cellular			ENSG00000165066	ASSOCIATED_GENE	NKX6-3		NKX6-3		157848			ASSOCIATED_GENE	FALSE	157848		[A6NJ46]	157848
227								2.Plasma Membrane	2.Plasma Membrane, 3.Intra Cellular			ENSG00000167910	ASSOCIATED_GENE	CYP7A1		CYP7A1		1581			ASSOCIATED_GENE	FALSE	1581		[P22680]	1581
228								2.Plasma Membrane	2.Plasma Membrane, 3.Intra Cellular			ENSG00000130150	ASSOCIATED_GENE	MOSPD2		MOSPD2		158747			ASSOCIATED_GENE	FALSE	158747		[Q8NHP6, R4GMN1]	158747
229								1.Extracellular	1.Extracellular, 2.Plasma Membrane, 3.Intra Cellular			ENSG00000035687	ASSOCIATED_GENE	ADSS		ADSS		159			ASSOCIATED_GENE	FALSE	159		[A0A024R5Q7, P30520]	159
230								2.Plasma Membrane	2.Plasma Membrane, 3.Intra Cellular			ENSG00000058866	ASSOCIATED_GENE	DGKG		DGKG		1608			ASSOCIATED_GENE	FALSE	1608		[P49619]	1608
231								0.Annotation definition not found in 'Homo Sapiens.properties' file	0.Annotation definition not found in 'Homo Sapiens.properties' file			ENSG00000153930	ASSOCIATED_GENE	ANKFN1		ANKFN1		162282			ASSOCIATED_GENE	FALSE	162282		[H3BM45, Q8N957]	162282
232								3.Intra Cellular	3.Intra Cellular			ENSG00000137992	ASSOCIATED_GENE	DBT		DBT		1629			ASSOCIATED_GENE	FALSE	1629		[P11182]	1629
233								3.Intra Cellular	3.Intra Cellular, 5.Nucleus			ENSG00000079785	ASSOCIATED_GENE	DDX1		DDX1		1653			ASSOCIATED_GENE	FALSE	1653		[A3RJH1, Q92499]	1653
234								3.Intra Cellular	3.Intra Cellular, 5.Nucleus			ENSG00000110367	ASSOCIATED_GENE	DDX6		DDX6		1656			ASSOCIATED_GENE	FALSE	1656		[B2R858, P26196]	1656
235								3.Intra Cellular	3.Intra Cellular			ENSG00000180346	ASSOCIATED_GENE	TIGD2		TIGD2		166815			ASSOCIATED_GENE	FALSE	166815		[B3KNK0, Q4W5G0, V9HWD1]	166815
236								1.Extracellular	1.Extracellular, 2.Plasma Membrane, 3.Intra Cellular			ENSG00000175084	ASSOCIATED_GENE	DES		DES		1674			ASSOCIATED_GENE	FALSE	1674		[P17661, Q53SB5]	1674
237								3.Intra Cellular	3.Intra Cellular			ENSG00000178175	ASSOCIATED_GENE	ZNF366		ZNF366		167465			ASSOCIATED_GENE	FALSE	167465		[Q8N895]	167465
238								3.Intra Cellular	3.Intra Cellular			ENSG00000135338	ASSOCIATED_GENE	LCA5		LCA5		167691			ASSOCIATED_GENE	FALSE	167691		[Q86VQ0]	167691
239								3.Intra Cellular	3.Intra Cellular			ENSG00000179144	ASSOCIATED_GENE	GIMAP7		GIMAP7		168537			ASSOCIATED_GENE	FALSE	168537		[A0A090N8P8, Q8NHV1]	168537
240								1.Extracellular	1.Extracellular, 3.Intra Cellular			ENSG00000169436	ASSOCIATED_GENE	COL22A1		COL22A1		169044			ASSOCIATED_GENE	FALSE	169044		[Q8NFW1]	169044
241								3.Intra Cellular	3.Intra Cellular			ENSG00000175787	ASSOCIATED_GENE	ZNF169		ZNF169		169841			ASSOCIATED_GENE	FALSE	169841		[Q14929]	169841
242								1.Extracellular	1.Extracellular			ENSG00000140873	ASSOCIATED_GENE	ADAMTS18		ADAMTS18		170692			ASSOCIATED_GENE	FALSE	170692		[Q2VYF7, Q6ZN25, Q8TE60]	170692
243								3.Intra Cellular	3.Intra Cellular			ENSG00000095059	ASSOCIATED_GENE	DHPS		DHPS		1725			ASSOCIATED_GENE	FALSE	1725		[A0A024R7D0, A0A024R7E9, P49366]	1725
244								3.Intra Cellular	3.Intra Cellular			ENSG00000185800	ASSOCIATED_GENE	DMWD		DMWD		1762			ASSOCIATED_GENE	FALSE	1762		[Q09019, Q8WUW6]	1762
245								1.Extracellular	1.Extracellular, 3.Intra Cellular			ENSG00000013563	ASSOCIATED_GENE	DNASE1L1		DNASE1L1		1774			ASSOCIATED_GENE	FALSE	1774		[P49184]	1774
246								1.Extracellular	1.Extracellular, 3.Intra Cellular			ENSG00000197102	ASSOCIATED_GENE	DYNC1H1		DYNC1H1		1778			ASSOCIATED_GENE	FALSE	1778		[Q14204]	1778
247								3.Intra Cellular	3.Intra Cellular			ENSG00000150760	ASSOCIATED_GENE	DOCK1		DOCK1		1793			ASSOCIATED_GENE	FALSE	1793		[B2RUU3, Q14185]	1793
248								3.Intra Cellular	3.Intra Cellular, 5.Nucleus			ENSG00000108591	ASSOCIATED_GENE	DRG2		DRG2		1819			ASSOCIATED_GENE	FALSE	1819		[A8MZF9, P55039]	1819
249								3.Intra Cellular	3.Intra Cellular, 5.Nucleus			ENSG00000111676	ASSOCIATED_GENE	ATN1		ATN1		1822			ASSOCIATED_GENE	FALSE	1822		[P54259, Q86V38]	1822
250								3.Intra Cellular	3.Intra Cellular			ENSG00000120129	ASSOCIATED_GENE	DUSP1		DUSP1		1843			ASSOCIATED_GENE	FALSE	1843		[B4DU40, P28562]	1843
251								3.Intra Cellular	3.Intra Cellular, 5.Nucleus			ENSG00000139318	ASSOCIATED_GENE	DUSP6		DUSP6		1848			ASSOCIATED_GENE	FALSE	1848		[A0A024RBC1, Q16828, Q53GP9]	1848
252								3.Intra Cellular	3.Intra Cellular			ENSG00000164330	ASSOCIATED_GENE	EBF1		EBF1		1879			ASSOCIATED_GENE	FALSE	1879		[B4E2U8, Q9UH73]	1879
253								1.Extracellular	1.Extracellular, 3.Intra Cellular			ENSG00000127884	ASSOCIATED_GENE	ECHS1		ECHS1		1892			ASSOCIATED_GENE	FALSE	1892		[P30084]	1892
254								2.Plasma Membrane	2.Plasma Membrane, 3.Intra Cellular			ENSG00000198121	ASSOCIATED_GENE	LPAR1		LPAR1		1902			ASSOCIATED_GENE	FALSE	1902		[Q5VZX0, Q92633]	1902
255								3.Intra Cellular	3.Intra Cellular, 5.Nucleus			ENSG00000111752	ASSOCIATED_GENE	PHC1		PHC1		1911			ASSOCIATED_GENE	FALSE	1911		[P78364, Q6GMQ3, Q6N083]	1911
256								3.Intra Cellular	3.Intra Cellular, 5.Nucleus			ENSG00000165244	ASSOCIATED_GENE	ZNF367		ZNF367		195828			ASSOCIATED_GENE	FALSE	195828		[Q7RTV3]	195828
257								1.Extracellular	1.Extracellular, 3.Intra Cellular			ENSG00000161960	ASSOCIATED_GENE	EIF4A1		EIF4A1		1973			ASSOCIATED_GENE	FALSE	1973		[P60842]	1973
258								3.Intra Cellular	3.Intra Cellular, 5.Nucleus			ENSG00000155761	ASSOCIATED_GENE	SPAG17		SPAG17		200162			ASSOCIATED_GENE	FALSE	200162		[Q6Q759]	200162
259								1.Extracellular	1.Extracellular, 2.Plasma Membrane, 3.Intra Cellular			ENSG00000115020	ASSOCIATED_GENE	PIKFYVE		PIKFYVE		200576			ASSOCIATED_GENE	FALSE	200576		[Q9Y2I7]	200576
260								0.Annotation definition not found in 'Homo Sapiens.properties' file	0.Annotation definition not found in 'Homo Sapiens.properties' file			ENSG00000163689	ASSOCIATED_GENE	C3orf67		C3orf67		200844			ASSOCIATED_GENE	FALSE	200844		[C9J3M8, Q6ZVT6]	200844
261								2.Plasma Membrane	2.Plasma Membrane, 3.Intra Cellular			ENSG00000163959	ASSOCIATED_GENE	SLC51A		SLC51A		200931			ASSOCIATED_GENE	FALSE	200931		[Q86UW1]	200931
262								3.Intra Cellular	3.Intra Cellular, 5.Nucleus			ENSG00000159314	ASSOCIATED_GENE	ARHGAP27		ARHGAP27		201176			ASSOCIATED_GENE	FALSE	201176		[E9PIR1, E9PNT2, Q6ZUM4, Q8N2Y9]	201176
263								2.Plasma Membrane	2.Plasma Membrane, 3.Intra Cellular			ENSG00000174327	ASSOCIATED_GENE	SLC16A13		SLC16A13		201232			ASSOCIATED_GENE	FALSE	201232		[Q7RTY0]	201232
264								0.Annotation definition not found in 'Homo Sapiens.properties' file	0.Annotation definition not found in 'Homo Sapiens.properties' file			ENSG00000112297	ASSOCIATED_GENE	CRYBG1		CRYBG1		202			ASSOCIATED_GENE	FALSE	202		[A0A0J9YWL0, B3KPT0, Q9Y4K1]	202
265								0.Annotation definition not found in 'Homo Sapiens.properties' file	0.Annotation definition not found in 'Homo Sapiens.properties' file			ENSG00000165359	ASSOCIATED_GENE	INTS6L		INTS6L		203522			ASSOCIATED_GENE	FALSE	203522		[A0A1W2PPI5, Q5JSJ4, Q8N8M2]	203522
266								0.Annotation definition not found in 'Homo Sapiens.properties' file	0.Annotation definition not found in 'Homo Sapiens.properties' file			ENSG00000179046	ASSOCIATED_GENE	TRIML2		TRIML2		205860			ASSOCIATED_GENE	FALSE	205860		[B7ZLC3, Q8N7C3]	205860
267								3.Intra Cellular	3.Intra Cellular, 5.Nucleus			ENSG00000225830	ASSOCIATED_GENE	ERCC6		ERCC6		2074			ASSOCIATED_GENE	FALSE	2074		[A8K4Q3, P0DP91, Q03468, Q59FF6]	2074
268								1.Extracellular	1.Extracellular, 3.Intra Cellular, 5.Nucleus			ENSG00000173153	ASSOCIATED_GENE	ESRRA		ESRRA		2101			ASSOCIATED_GENE	FALSE	2101		[P11474, Q569H8]	2101
269								1.Extracellular	1.Extracellular, 2.Plasma Membrane, 3.Intra Cellular			ENSG00000167880	ASSOCIATED_GENE	EVPL		EVPL		2125			ASSOCIATED_GENE	FALSE	2125		[B7ZLH8, K7EKI0, Q92817]	2125
270								2.Plasma Membrane	2.Plasma Membrane, 3.Intra Cellular			ENSG00000123983	ASSOCIATED_GENE	ACSL3		ACSL3		2181			ASSOCIATED_GENE	FALSE	2181		[A0A024R497, B3KMA6, O95573]	2181
271								3.Intra Cellular	3.Intra Cellular			ENSG00000179115	ASSOCIATED_GENE	FARSA		FARSA		2193			ASSOCIATED_GENE	FALSE	2193		[Q6IBR2, Q9Y285]	2193
272								2.Plasma Membrane	2.Plasma Membrane, 3.Intra Cellular			ENSG00000184154	ASSOCIATED_GENE	LRTOMT		LRTOMT		220074			ASSOCIATED_GENE	FALSE	220074		[A0A024R5L6, Q8WZ04, Q96E66]	220074
273								0.Annotation definition not found in 'Homo Sapiens.properties' file	0.Annotation definition not found in 'Homo Sapiens.properties' file			ENSG00000150510	ASSOCIATED_GENE	FAM124A		FAM124A		220108			ASSOCIATED_GENE	FALSE	220108		[Q86V42]	220108
274								3.Intra Cellular	3.Intra Cellular, 5.Nucleus			ENSG00000214753	ASSOCIATED_GENE	HNRNPUL2		HNRNPUL2		221092			ASSOCIATED_GENE	FALSE	221092		[Q1KMD3]	221092
275								2.Plasma Membrane	2.Plasma Membrane, 3.Intra Cellular			ENSG00000069122	ASSOCIATED_GENE	ADGRF5		ADGRF5		221395			ASSOCIATED_GENE	FALSE	221395		[Q8IZF2]	221395
276								3.Intra Cellular	3.Intra Cellular			ENSG00000180113	ASSOCIATED_GENE	TDRD6		TDRD6		221400			ASSOCIATED_GENE	FALSE	221400		[O60522]	221400
277								2.Plasma Membrane	2.Plasma Membrane, 3.Intra Cellular, 4.Nuclear Membrane, 5.Nucleus			ENSG00000161904	ASSOCIATED_GENE	LEMD2		LEMD2		221496			ASSOCIATED_GENE	FALSE	221496		[A0A024RCZ1, Q8NC56]	221496
278								3.Intra Cellular	3.Intra Cellular			ENSG00000197037	ASSOCIATED_GENE	ZSCAN25		ZSCAN25		221785			ASSOCIATED_GENE	FALSE	221785		[B3KPY4, Q6NSZ9]	221785
279								2.Plasma Membrane	2.Plasma Membrane, 3.Intra Cellular			ENSG00000079459	ASSOCIATED_GENE	FDFT1		FDFT1		2222			ASSOCIATED_GENE	FALSE	2222		[A0A1W2PQ47, B4DND3, B4DWP0, B7Z9R8, P37268, Q6IAX1]	2222
280								1.Extracellular	1.Extracellular, 2.Plasma Membrane, 3.Intra Cellular			ENSG00000171564	ASSOCIATED_GENE	FGB		FGB		2244			ASSOCIATED_GENE	FALSE	2244		[P02675, V9HVY1]	2244
281								1.Extracellular	1.Extracellular			ENSG00000104760	ASSOCIATED_GENE	FGL1		FGL1		2267			ASSOCIATED_GENE	FALSE	2267		[Q08830]	2267
282								2.Plasma Membrane	2.Plasma Membrane, 3.Intra Cellular, 5.Nucleus			ENSG00000161405	ASSOCIATED_GENE	IKZF3		IKZF3		22806			ASSOCIATED_GENE	FALSE	22806		[Q9UKT9]	22806
283								3.Intra Cellular	3.Intra Cellular, 5.Nucleus			ENSG00000139289	ASSOCIATED_GENE	PHLDA1		PHLDA1		22822			ASSOCIATED_GENE	FALSE	22822		[Q8WV24]	22822
284								1.Extracellular	1.Extracellular, 3.Intra Cellular			ENSG00000164292	ASSOCIATED_GENE	RHOBTB3		RHOBTB3		22836			ASSOCIATED_GENE	FALSE	22836		[O94955]	22836
285								1.Extracellular	1.Extracellular, 3.Intra Cellular			ENSG00000071246	ASSOCIATED_GENE	VASH1		VASH1		22846			ASSOCIATED_GENE	FALSE	22846		[Q7L8A9]	22846
286								2.Plasma Membrane	2.Plasma Membrane, 3.Intra Cellular			ENSG00000126775	ASSOCIATED_GENE	ATG14		ATG14		22863			ASSOCIATED_GENE	FALSE	22863		[Q6ZNE5]	22863
287								2.Plasma Membrane	2.Plasma Membrane			ENSG00000121871	ASSOCIATED_GENE	SLITRK3		SLITRK3		22865			ASSOCIATED_GENE	FALSE	22865		[O94933]	22865
288								1.Extracellular	1.Extracellular, 3.Intra Cellular, 5.Nucleus			ENSG00000004478	ASSOCIATED_GENE	FKBP4		FKBP4		2288			ASSOCIATED_GENE	FALSE	2288		[Q02790]	2288
289								3.Intra Cellular	3.Intra Cellular, 4.Nuclear Membrane, 5.Nucleus			ENSG00000126804	ASSOCIATED_GENE	ZBTB1		ZBTB1		22890			ASSOCIATED_GENE	FALSE	22890		[Q9Y2K1]	22890
290						Transcription Factor Complex	Transcription Factor Complex	3.Intra Cellular	3.Intra Cellular, 5.Nucleus			ENSG00000100603	ASSOCIATED_GENE	SNW1		SNW1		22938			ASSOCIATED_GENE	FALSE	22938		[G3V3A4, Q13573]	22938
291								2.Plasma Membrane	2.Plasma Membrane, 3.Intra Cellular, 5.Nucleus			ENSG00000163798	ASSOCIATED_GENE	SLC4A1AP		SLC4A1AP		22950			ASSOCIATED_GENE	FALSE	22950		[Q9BWU0]	22950
292								0.Annotation definition not found in 'Homo Sapiens.properties' file	0.Annotation definition not found in 'Homo Sapiens.properties' file			ENSG00000151240	ASSOCIATED_GENE	DIP2C		DIP2C		22982			ASSOCIATED_GENE	FALSE	22982		[A0A0U1RQW6, Q86XV3, Q9Y2E4]	22982
293								3.Intra Cellular	3.Intra Cellular, 5.Nucleus			ENSG00000148843	ASSOCIATED_GENE	PDCD11		PDCD11		22984			ASSOCIATED_GENE	FALSE	22984		[Q14690]	22984
294								2.Plasma Membrane	2.Plasma Membrane, 3.Intra Cellular, 5.Nucleus			ENSG00000100813	ASSOCIATED_GENE	ACIN1		ACIN1		22985			ASSOCIATED_GENE	FALSE	22985		[B4DQZ7, Q9UKV3]	22985
295								1.Extracellular	1.Extracellular, 3.Intra Cellular			ENSG00000141577	ASSOCIATED_GENE	CEP131		CEP131		22994			ASSOCIATED_GENE	FALSE	22994		[I3L2J8, Q9UPN4]	22994
296								3.Intra Cellular	3.Intra Cellular			ENSG00000176678	ASSOCIATED_GENE	FOXL1		FOXL1		2300			ASSOCIATED_GENE	FALSE	2300		[Q12952, Q498Y4]	2300
297								3.Intra Cellular	3.Intra Cellular, 5.Nucleus			ENSG00000020577	ASSOCIATED_GENE	SAMD4A		SAMD4A		23034			ASSOCIATED_GENE	FALSE	23034		[G3V2R1, Q8WW19, Q9UPU9]	23034
298								1.Extracellular	1.Extracellular, 3.Intra Cellular			ENSG00000149218	ASSOCIATED_GENE	ENDOD1		ENDOD1		23052			ASSOCIATED_GENE	FALSE	23052		[O94919]	23052
299								3.Intra Cellular	3.Intra Cellular, 5.Nucleus			ENSG00000180357	ASSOCIATED_GENE	ZNF609		ZNF609		23060			ASSOCIATED_GENE	FALSE	23060		[O15014]	23060
300								1.Extracellular	1.Extracellular, 3.Intra Cellular, 5.Nucleus			ENSG00000107290	ASSOCIATED_GENE	SETX		SETX		23064			ASSOCIATED_GENE	FALSE	23064		[A0A0S2Z550, Q7Z333]	23064
301								1.Extracellular	1.Extracellular, 2.Plasma Membrane, 3.Intra Cellular			ENSG00000023318	ASSOCIATED_GENE	ERP44		ERP44		23071			ASSOCIATED_GENE	FALSE	23071		[Q9BS26]	23071
302								2.Plasma Membrane	2.Plasma Membrane, 3.Intra Cellular			ENSG00000082805	ASSOCIATED_GENE	ERC1		ERC1		23085			ASSOCIATED_GENE	FALSE	23085		[G8JLD3, Q8IUD2, X6RLX0]	23085
303								2.Plasma Membrane	2.Plasma Membrane, 3.Intra Cellular, 4.Nuclear Membrane, 5.Nucleus			ENSG00000132359	ASSOCIATED_GENE	RAP1GAP2		RAP1GAP2		23108			ASSOCIATED_GENE	FALSE	23108		[A0A1B0GV05, Q684P5]	23108
304								0.Annotation definition not found in 'Homo Sapiens.properties' file	0.Annotation definition not found in 'Homo Sapiens.properties' file			ENSG00000109436	ASSOCIATED_GENE	TBC1D9		TBC1D9		23158			ASSOCIATED_GENE	FALSE	23158		[Q6ZT07]	23158
305								3.Intra Cellular	3.Intra Cellular			ENSG00000160305	ASSOCIATED_GENE	DIP2A		DIP2A		23181			ASSOCIATED_GENE	FALSE	23181		[Q14689, Q96NX2]	23181
306								2.Plasma Membrane	2.Plasma Membrane, 3.Intra Cellular			ENSG00000117899	ASSOCIATED_GENE	MESD		MESD		23184			ASSOCIATED_GENE	FALSE	23184		[Q14696]	23184
307								1.Extracellular	1.Extracellular, 2.Plasma Membrane, 3.Intra Cellular			ENSG00000165688	ASSOCIATED_GENE	PMPCA		PMPCA		23203			ASSOCIATED_GENE	FALSE	23203		[Q10713]	23203
308								2.Plasma Membrane	2.Plasma Membrane, 3.Intra Cellular, 5.Nucleus			ENSG00000169180	ASSOCIATED_GENE	XPO6		XPO6		23214			ASSOCIATED_GENE	FALSE	23214		[Q96QU8]	23214
309								3.Intra Cellular	3.Intra Cellular			ENSG00000065882	ASSOCIATED_GENE	TBC1D1		TBC1D1		23216			ASSOCIATED_GENE	FALSE	23216		[B9A6J6, Q6PJJ8, Q86TI0, Q8NC59]	23216
310								3.Intra Cellular	3.Intra Cellular			ENSG00000131089	ASSOCIATED_GENE	ARHGEF9		ARHGEF9		23229			ASSOCIATED_GENE	FALSE	23229		[B1AMR3, O43307]	23229
311								2.Plasma Membrane	2.Plasma Membrane, 3.Intra Cellular			ENSG00000068650	ASSOCIATED_GENE	ATP11A		ATP11A		23250			ASSOCIATED_GENE	FALSE	23250		[E9PEJ6, P98196, Q659C3, Q6PJ25]	23250
312								3.Intra Cellular	3.Intra Cellular			ENSG00000114648	ASSOCIATED_GENE	KLHL18		KLHL18		23276			ASSOCIATED_GENE	FALSE	23276		[A0A024R2T4, B4DHW4, O94889]	23276
313								2.Plasma Membrane	2.Plasma Membrane			ENSG00000150471	ASSOCIATED_GENE	ADGRL3		ADGRL3		23284			ASSOCIATED_GENE	FALSE	23284		[B7Z2G2, E7ESV6, E7EUP0, E7EUW2, E7EVD6, Q9HAR2]	23284
314								3.Intra Cellular	3.Intra Cellular, 5.Nucleus			ENSG00000064999	ASSOCIATED_GENE	ANKS1A		ANKS1A		23294			ASSOCIATED_GENE	FALSE	23294		[Q05CP0, Q92625]	23294
315								2.Plasma Membrane	2.Plasma Membrane, 3.Intra Cellular, 5.Nucleus			ENSG00000185963	ASSOCIATED_GENE	BICD2		BICD2		23299			ASSOCIATED_GENE	FALSE	23299		[Q8TD16, Q96FU2]	23299
316								0.Annotation definition not found in 'Homo Sapiens.properties' file	0.Annotation definition not found in 'Homo Sapiens.properties' file			ENSG00000122733	ASSOCIATED_GENE	PHF24		PHF24		23349			ASSOCIATED_GENE	FALSE	23349		[Q9UPV7]	23349
317								3.Intra Cellular	3.Intra Cellular			ENSG00000156931	ASSOCIATED_GENE	VPS8		VPS8		23355			ASSOCIATED_GENE	FALSE	23355		[B3KPR6, Q8N3P4]	23355
318								3.Intra Cellular	3.Intra Cellular, 5.Nucleus			ENSG00000162402	ASSOCIATED_GENE	USP24		USP24		23358			ASSOCIATED_GENE	FALSE	23358		[Q9UPU5]	23358
319								3.Intra Cellular	3.Intra Cellular			ENSG00000124006	ASSOCIATED_GENE	OBSL1		OBSL1		23363			ASSOCIATED_GENE	FALSE	23363		[O75147, Q9H8B3]	23363
320								3.Intra Cellular	3.Intra Cellular, 4.Nuclear Membrane, 5.Nucleus			ENSG00000055917	ASSOCIATED_GENE	PUM2		PUM2		23369			ASSOCIATED_GENE	FALSE	23369		[A0A0A0MR59, B7ZL34, Q8TB72]	23369
321								2.Plasma Membrane	2.Plasma Membrane, 3.Intra Cellular			ENSG00000014123	ASSOCIATED_GENE	UFL1		UFL1		23376			ASSOCIATED_GENE	FALSE	23376		[O94874]	23376
322								3.Intra Cellular	3.Intra Cellular			ENSG00000112855	ASSOCIATED_GENE	HARS2		HARS2		23438			ASSOCIATED_GENE	FALSE	23438		[B4DDN8, P49590]	23438
323								1.Extracellular	1.Extracellular, 2.Plasma Membrane, 3.Intra Cellular, 5.Nucleus			ENSG00000070214	ASSOCIATED_GENE	SLC44A1		SLC44A1		23446			ASSOCIATED_GENE	FALSE	23446		[A0A024R151, Q8WWI5]	23446
324								1.Extracellular	1.Extracellular, 2.Plasma Membrane, 3.Intra Cellular			ENSG00000086205	ASSOCIATED_GENE	FOLH1		FOLH1		2346			ASSOCIATED_GENE	FALSE	2346		[Q04609]	2346
325								2.Plasma Membrane	2.Plasma Membrane, 3.Intra Cellular			ENSG00000154265	ASSOCIATED_GENE	ABCA5		ABCA5		23461			ASSOCIATED_GENE	FALSE	23461		[Q8WWZ7]	23461
326								3.Intra Cellular	3.Intra Cellular, 4.Nuclear Membrane, 5.Nucleus			ENSG00000064419	ASSOCIATED_GENE	TNPO3		TNPO3		23534			ASSOCIATED_GENE	FALSE	23534		[A0A024R794, B3KMX1, E9PFH4, Q9Y5L0]	23534
327								3.Intra Cellular	3.Intra Cellular			ENSG00000136877	ASSOCIATED_GENE	FPGS		FPGS		2356			ASSOCIATED_GENE	FALSE	2356		[Q05932]	2356
328								3.Intra Cellular	3.Intra Cellular, 4.Nuclear Membrane, 5.Nucleus			ENSG00000107937	ASSOCIATED_GENE	GTPBP4		GTPBP4		23560			ASSOCIATED_GENE	FALSE	23560		[D2CFK9, Q9BZE4]	23560
329								3.Intra Cellular	3.Intra Cellular			ENSG00000011454	ASSOCIATED_GENE	RABGAP1		RABGAP1		23637			ASSOCIATED_GENE	FALSE	23637		[Q9Y3P9]	23637
330								2.Plasma Membrane	2.Plasma Membrane, 3.Intra Cellular			ENSG00000087074	ASSOCIATED_GENE	PPP1R15A		PPP1R15A		23645			ASSOCIATED_GENE	FALSE	23645		[O75807]	23645
331								1.Extracellular	1.Extracellular, 3.Intra Cellular			ENSG00000166263	ASSOCIATED_GENE	STXBP4		STXBP4		252983			ASSOCIATED_GENE	FALSE	252983		[B5MCT9, Q6ZWJ1]	252983
332								2.Plasma Membrane	2.Plasma Membrane, 3.Intra Cellular			ENSG00000162571	ASSOCIATED_GENE	TTLL10		TTLL10		254173			ASSOCIATED_GENE	FALSE	254173		[Q6ZVT0]	254173
333								0.Annotation definition not found in 'Homo Sapiens.properties' file	0.Annotation definition not found in 'Homo Sapiens.properties' file			ENSG00000175513	ASSOCIATED_GENE	TSGA10IP		TSGA10IP		254187			ASSOCIATED_GENE	FALSE	254187		[Q3SY00]	254187
334								3.Intra Cellular	3.Intra Cellular			ENSG00000111877	ASSOCIATED_GENE	MCM9		MCM9		254394			ASSOCIATED_GENE	FALSE	254394		[A0A0S2Z662, Q9NXL9]	254394
335								1.Extracellular	1.Extracellular, 2.Plasma Membrane, 3.Intra Cellular			ENSG00000171298	ASSOCIATED_GENE	GAA		GAA		2548			ASSOCIATED_GENE	FALSE	2548		[P10253]	2548
336								3.Intra Cellular	3.Intra Cellular			ENSG00000152520	ASSOCIATED_GENE	PAN3		PAN3		255967			ASSOCIATED_GENE	FALSE	255967		[Q58A45]	255967
337								1.Extracellular	1.Extracellular, 3.Intra Cellular			ENSG00000148357	ASSOCIATED_GENE	HMCN2		HMCN2		256158			ASSOCIATED_GENE	FALSE	256158			256158
338								2.Plasma Membrane	2.Plasma Membrane			ENSG00000111886	ASSOCIATED_GENE	GABRR2		GABRR2		2570			ASSOCIATED_GENE	FALSE	2570		[B4DER2, P28476]	2570
339								3.Intra Cellular	3.Intra Cellular			ENSG00000186517	ASSOCIATED_GENE	ARHGAP30		ARHGAP30		257106			ASSOCIATED_GENE	FALSE	257106		[A0A0A0MRJ8, A0A0A0MRJ9, Q7Z6I6]	257106
340								0.Annotation definition not found in 'Homo Sapiens.properties' file	0.Annotation definition not found in 'Homo Sapiens.properties' file			ENSG00000204128	ASSOCIATED_GENE	C2orf72		C2orf72		257407			ASSOCIATED_GENE	FALSE	257407		[A6NCS6]	257407
341								3.Intra Cellular	3.Intra Cellular			ENSG00000186765	ASSOCIATED_GENE	FSCN2		FSCN2		25794			ASSOCIATED_GENE	FALSE	25794		[O14926]	25794
342								3.Intra Cellular	3.Intra Cellular			ENSG00000163431	ASSOCIATED_GENE	LMOD1		LMOD1		25802			ASSOCIATED_GENE	FALSE	25802		[P29536]	25802
343								1.Extracellular	1.Extracellular, 3.Intra Cellular			ENSG00000117308	ASSOCIATED_GENE	GALE		GALE		2582			ASSOCIATED_GENE	FALSE	2582		[Q14376]	2582
344								3.Intra Cellular	3.Intra Cellular			ENSG00000092148	ASSOCIATED_GENE	HECTD1		HECTD1		25831			ASSOCIATED_GENE	FALSE	25831		[Q9ULT8]	25831
345								3.Intra Cellular	3.Intra Cellular			ENSG00000251247	ASSOCIATED_GENE	ZNF345		ZNF345		25850			ASSOCIATED_GENE	FALSE	25850		[B2RCE4, Q14585]	25850
346								3.Intra Cellular	3.Intra Cellular, 5.Nucleus			ENSG00000130255	ASSOCIATED_GENE	RPL36		RPL36		25873			ASSOCIATED_GENE	FALSE	25873		[Q9Y3U8]	25873
347								2.Plasma Membrane	2.Plasma Membrane, 3.Intra Cellular, 5.Nucleus			ENSG00000050426	ASSOCIATED_GENE	LETMD1		LETMD1		25875			ASSOCIATED_GENE	FALSE	25875		[F8W1Z2, Q6P1Q0]	25875
348								1.Extracellular	1.Extracellular, 3.Intra Cellular, 4.Nuclear Membrane, 5.Nucleus			ENSG00000153207	ASSOCIATED_GENE	AHCTF1		AHCTF1		25909			ASSOCIATED_GENE	FALSE	25909		[Q8WYP5]	25909
349								3.Intra Cellular	3.Intra Cellular			ENSG00000176225	ASSOCIATED_GENE	RTTN		RTTN		25914			ASSOCIATED_GENE	FALSE	25914		[Q86VV8]	25914
350								3.Intra Cellular	3.Intra Cellular			ENSG00000170852	ASSOCIATED_GENE	KBTBD2		KBTBD2		25948			ASSOCIATED_GENE	FALSE	25948		[A0A024RA38, Q8IY47]	25948
351								0.Annotation definition not found in 'Homo Sapiens.properties' file	0.Annotation definition not found in 'Homo Sapiens.properties' file			ENSG00000214013	ASSOCIATED_GENE	GANC		GANC		2595			ASSOCIATED_GENE	FALSE	2595		[B4DWC5, E7EWB6, H3BN99, Q8TET4]	2595
352								1.Extracellular	1.Extracellular			ENSG00000198759	ASSOCIATED_GENE	EGFL6		EGFL6		25975			ASSOCIATED_GENE	FALSE	25975		[Q8IUX8]	25975
353								3.Intra Cellular	3.Intra Cellular			ENSG00000114841	ASSOCIATED_GENE	DNAH1		DNAH1		25981			ASSOCIATED_GENE	FALSE	25981		[A0A140VJI6, Q9P2D7]	25981
354								3.Intra Cellular	3.Intra Cellular			ENSG00000168014	ASSOCIATED_GENE	C2CD3		C2CD3		26005			ASSOCIATED_GENE	FALSE	26005		[Q4AC94]	26005
355								2.Plasma Membrane	2.Plasma Membrane			ENSG00000146006	ASSOCIATED_GENE	LRRTM2		LRRTM2		26045			ASSOCIATED_GENE	FALSE	26045		[O43300]	26045
356								3.Intra Cellular	3.Intra Cellular, 4.Nuclear Membrane, 5.Nucleus			ENSG00000198780	ASSOCIATED_GENE	FAM169A		FAM169A		26049			ASSOCIATED_GENE	FALSE	26049		[Q9Y6X4]	26049
357								3.Intra Cellular	3.Intra Cellular, 5.Nucleus			ENSG00000112701	ASSOCIATED_GENE	SENP6		SENP6		26054			ASSOCIATED_GENE	FALSE	26054		[B3KMM0, F8W6D9, Q9GZR1]	26054
358								3.Intra Cellular	3.Intra Cellular			ENSG00000131373	ASSOCIATED_GENE	HACL1		HACL1		26061			ASSOCIATED_GENE	FALSE	26061		[B4DXR1, Q9UJ83]	26061
359								3.Intra Cellular	3.Intra Cellular			ENSG00000128408	ASSOCIATED_GENE	RIBC2		RIBC2		26150			ASSOCIATED_GENE	FALSE	26150		[A0A087X0F7, Q9H4K1]	26150
360						Transcription Factor Complex	Transcription Factor Complex	1.Extracellular	1.Extracellular, 2.Plasma Membrane, 3.Intra Cellular, 4.Nuclear Membrane, 5.Nucleus			ENSG00000106105	ASSOCIATED_GENE	GARS		GARS		2617			ASSOCIATED_GENE	FALSE	2617		[A0A090N8G0, P41250]	2617
361								3.Intra Cellular	3.Intra Cellular			ENSG00000136327	ASSOCIATED_GENE	NKX2-8		NKX2-8		26257			ASSOCIATED_GENE	FALSE	26257		[O15522]	26257
362								3.Intra Cellular	3.Intra Cellular			ENSG00000112146	ASSOCIATED_GENE	FBXO9		FBXO9		26268			ASSOCIATED_GENE	FALSE	26268		[Q9UK97]	26268
363								3.Intra Cellular	3.Intra Cellular, 5.Nucleus			ENSG00000129158	ASSOCIATED_GENE	SERGEF		SERGEF		26297			ASSOCIATED_GENE	FALSE	26297		[A8K8C1, Q9UGK8]	26297
364								3.Intra Cellular	3.Intra Cellular, 5.Nucleus			ENSG00000084734	ASSOCIATED_GENE	GCKR		GCKR		2646			ASSOCIATED_GENE	FALSE	2646		[A0A0C4DFN2, Q14397]	2646
365								1.Extracellular	1.Extracellular, 2.Plasma Membrane, 3.Intra Cellular, 4.Nuclear Membrane, 5.Nucleus			ENSG00000138119	ASSOCIATED_GENE	MYOF		MYOF		26509			ASSOCIATED_GENE	FALSE	26509		[Q9NZM1]	26509
366								3.Intra Cellular	3.Intra Cellular			ENSG00000150457	ASSOCIATED_GENE	LATS2		LATS2		26524			ASSOCIATED_GENE	FALSE	26524		[A0A024RDM3, Q9NRM7]	26524
367								1.Extracellular	1.Extracellular			ENSG00000263761	ASSOCIATED_GENE	GDF2		GDF2		2658			ASSOCIATED_GENE	FALSE	2658		[B2RC63, Q9UK05]	2658
368								2.Plasma Membrane	2.Plasma Membrane			ENSG00000173890	ASSOCIATED_GENE	GPR160		GPR160		26996			ASSOCIATED_GENE	FALSE	26996		[Q9UJ42]	26996
369								3.Intra Cellular	3.Intra Cellular, 4.Nuclear Membrane, 5.Nucleus			ENSG00000105821	ASSOCIATED_GENE	DNAJC2		DNAJC2		27000			ASSOCIATED_GENE	FALSE	27000		[Q99543]	27000
370								3.Intra Cellular	3.Intra Cellular, 5.Nucleus			ENSG00000119684	ASSOCIATED_GENE	MLH3		MLH3		27030			ASSOCIATED_GENE	FALSE	27030		[Q2M1Z1, Q9UHC1]	27030
371								1.Extracellular	1.Extracellular, 2.Plasma Membrane, 3.Intra Cellular			ENSG00000109956	ASSOCIATED_GENE	B3GAT1		B3GAT1		27087			ASSOCIATED_GENE	FALSE	27087		[Q9P2W7]	27087
372								2.Plasma Membrane	2.Plasma Membrane, 3.Intra Cellular			ENSG00000100055	ASSOCIATED_GENE	CYTH4		CYTH4		27128			ASSOCIATED_GENE	FALSE	27128		[B4E2V8, Q9UIA0]	27128
373								2.Plasma Membrane	2.Plasma Membrane, 3.Intra Cellular			ENSG00000143570	ASSOCIATED_GENE	SLC39A1		SLC39A1		27173			ASSOCIATED_GENE	FALSE	27173		[A0A0A0MTL8, Q9NY26]	27173
374								1.Extracellular	1.Extracellular, 3.Intra Cellular, 5.Nucleus			ENSG00000125571	ASSOCIATED_GENE	IL37		IL37		27178			ASSOCIATED_GENE	FALSE	27178		[Q9NZH6]	27178
375								2.Plasma Membrane	2.Plasma Membrane			ENSG00000250510	ASSOCIATED_GENE	GPR162		GPR162		27239			ASSOCIATED_GENE	FALSE	27239		[A0A0I9QPQ8, Q16538]	27239
376								3.Intra Cellular	3.Intra Cellular			ENSG00000150593	ASSOCIATED_GENE	PDCD4		PDCD4		27250			ASSOCIATED_GENE	FALSE	27250		[B4DKX4, Q53EL6]	27250
377								3.Intra Cellular	3.Intra Cellular			ENSG00000173597	ASSOCIATED_GENE	SULT1B1		SULT1B1		27284			ASSOCIATED_GENE	FALSE	27284		[O43704]	27284
378								1.Extracellular	1.Extracellular			ENSG00000134028	ASSOCIATED_GENE	ADAMDEC1		ADAMDEC1		27299			ASSOCIATED_GENE	FALSE	27299		[B7Z6V5, O15204]	27299
379								3.Intra Cellular	3.Intra Cellular			ENSG00000148672	ASSOCIATED_GENE	GLUD1		GLUD1		2746			ASSOCIATED_GENE	FALSE	2746		[E9KL48, P00367]	2746
380								1.Extracellular	1.Extracellular, 2.Plasma Membrane, 3.Intra Cellular			ENSG00000141404	ASSOCIATED_GENE	GNAL		GNAL		2774			ASSOCIATED_GENE	FALSE	2774		[A8K1Y9, P38405]	2774
381								1.Extracellular	1.Extracellular, 2.Plasma Membrane, 3.Intra Cellular			ENSG00000087460	ASSOCIATED_GENE	GNAS		GNAS		2778			ASSOCIATED_GENE	FALSE	2778		[A0A0S2Z3H8, A0A0S2Z3S5, B0AZR9, O95467, P63092, P84996, Q14455, Q5FWY2, Q5JWD1, Q5JWF2]	2778
382								2.Plasma Membrane	2.Plasma Membrane			ENSG00000109163	ASSOCIATED_GENE	GNRHR		GNRHR		2798			ASSOCIATED_GENE	FALSE	2798		[P30968]	2798
383								1.Extracellular	1.Extracellular, 3.Intra Cellular			ENSG00000175793	ASSOCIATED_GENE	SFN		SFN		2810			ASSOCIATED_GENE	FALSE	2810		[P31947]	2810
384								1.Extracellular	1.Extracellular, 2.Plasma Membrane, 3.Intra Cellular, 5.Nucleus			ENSG00000105220	ASSOCIATED_GENE	GPI		GPI		2821			ASSOCIATED_GENE	FALSE	2821		[B4DE36, P06744]	2821
385								1.Extracellular	1.Extracellular			ENSG00000197110	ASSOCIATED_GENE	IFNL3		IFNL3		282617			ASSOCIATED_GENE	FALSE	282617		[A0A0C4DGW8, Q8IZI9]	282617
386								2.Plasma Membrane	2.Plasma Membrane			ENSG00000174970	ASSOCIATED_GENE	OR10AG1		OR10AG1		282770			ASSOCIATED_GENE	FALSE	282770		[A0A126GVM8, Q8NH19]	282770
387								3.Intra Cellular	3.Intra Cellular			ENSG00000148803	ASSOCIATED_GENE	FUOM		FUOM		282969			ASSOCIATED_GENE	FALSE	282969		[A2VDF0, X6R6T9]	282969
388								3.Intra Cellular	3.Intra Cellular			ENSG00000149380	ASSOCIATED_GENE	P4HA3		P4HA3		283208			ASSOCIATED_GENE	FALSE	283208		[Q7Z4N8]	283208
389								3.Intra Cellular	3.Intra Cellular			ENSG00000165434	ASSOCIATED_GENE	PGM2L1		PGM2L1		283209			ASSOCIATED_GENE	FALSE	283209		[Q6PCE3]	283209
390								2.Plasma Membrane	2.Plasma Membrane, 3.Intra Cellular			ENSG00000139044	ASSOCIATED_GENE	B4GALNT3		B4GALNT3		283358			ASSOCIATED_GENE	FALSE	283358		[Q6L9W6, Q8N9V0]	283358
391								3.Intra Cellular	3.Intra Cellular			ENSG00000198553	ASSOCIATED_GENE	KCNRG		KCNRG		283518			ASSOCIATED_GENE	FALSE	283518		[Q8N5I3]	283518
392								0.Annotation definition not found in 'Homo Sapiens.properties' file	0.Annotation definition not found in 'Homo Sapiens.properties' file			ENSG00000188659	ASSOCIATED_GENE	SAXO2		SAXO2		283726			ASSOCIATED_GENE	FALSE	283726		[Q658L1]	283726
393								3.Intra Cellular	3.Intra Cellular			ENSG00000184207	ASSOCIATED_GENE	PGP		PGP		283871			ASSOCIATED_GENE	FALSE	283871		[A6NDG6]	283871
394								3.Intra Cellular	3.Intra Cellular, 5.Nucleus			ENSG00000169592	ASSOCIATED_GENE	INO80E		INO80E		283899			ASSOCIATED_GENE	FALSE	283899		[J3KNE2, Q8NBZ0]	283899
395								2.Plasma Membrane	2.Plasma Membrane, 3.Intra Cellular			ENSG00000167914	ASSOCIATED_GENE	GSDMA		GSDMA		284110			ASSOCIATED_GENE	FALSE	284110		[Q96QA5]	284110
396								1.Extracellular	1.Extracellular			ENSG00000101680	ASSOCIATED_GENE	LAMA1		LAMA1		284217			ASSOCIATED_GENE	FALSE	284217		[P25391]	284217
397								0.Annotation definition not found in 'Homo Sapiens.properties' file	0.Annotation definition not found in 'Homo Sapiens.properties' file			ENSG00000188368	ASSOCIATED_GENE	PRR19		PRR19		284338			ASSOCIATED_GENE	FALSE	284338		[A6NJB7]	284338
398								2.Plasma Membrane	2.Plasma Membrane, 3.Intra Cellular			ENSG00000182264	ASSOCIATED_GENE	IZUMO1		IZUMO1		284359			ASSOCIATED_GENE	FALSE	284359		[Q8IYV9]	284359
399								1.Extracellular	1.Extracellular, 2.Plasma Membrane, 3.Intra Cellular			ENSG00000198719	ASSOCIATED_GENE	DLL1		DLL1		28514			ASSOCIATED_GENE	FALSE	28514		[O00548]	28514
400								2.Plasma Membrane	2.Plasma Membrane			ENSG00000144406	ASSOCIATED_GENE	UNC80		UNC80		285175			ASSOCIATED_GENE	FALSE	285175		[Q8N2C7]	285175
401								2.Plasma Membrane	2.Plasma Membrane			ENSG00000120436	ASSOCIATED_GENE	GPR31		GPR31		2853			ASSOCIATED_GENE	FALSE	2853		[O00270]	2853
402								2.Plasma Membrane	2.Plasma Membrane, 3.Intra Cellular, 4.Nuclear Membrane, 5.Nucleus			ENSG00000198873	ASSOCIATED_GENE	GRK5		GRK5		2869			ASSOCIATED_GENE	FALSE	2869		[P34947]	2869
403								1.Extracellular	1.Extracellular, 2.Plasma Membrane, 3.Intra Cellular			ENSG00000176884	ASSOCIATED_GENE	GRIN1		GRIN1		2902			ASSOCIATED_GENE	FALSE	2902		[Q05586, Q59GW0, Q5VSF9]	2902
404								3.Intra Cellular	3.Intra Cellular, 5.Nucleus			ENSG00000181555	ASSOCIATED_GENE	SETD2		SETD2		29072			ASSOCIATED_GENE	FALSE	29072		[Q9BYW2]	29072
405								2.Plasma Membrane	2.Plasma Membrane, 3.Intra Cellular			ENSG00000152822	ASSOCIATED_GENE	GRM1		GRM1		2911			ASSOCIATED_GENE	FALSE	2911		[Q13255, Q59HC2]	2911
406								3.Intra Cellular	3.Intra Cellular			ENSG00000183230	ASSOCIATED_GENE	CTNNA3		CTNNA3		29119			ASSOCIATED_GENE	FALSE	29119		[A8K141, Q8WW10, Q9UI47]	29119
407								1.Extracellular	1.Extracellular, 3.Intra Cellular			ENSG00000167004	ASSOCIATED_GENE	PDIA3		PDIA3		2923			ASSOCIATED_GENE	FALSE	2923		[P30101, V9HVY3]	2923
408						Transcription Factor Complex	Transcription Factor Complex	3.Intra Cellular	3.Intra Cellular, 5.Nucleus			ENSG00000153767	ASSOCIATED_GENE	GTF2E1		GTF2E1		2960			ASSOCIATED_GENE	FALSE	2960		[P29083]	2960
409						Transcription Factor Complex	Transcription Factor Complex	3.Intra Cellular	3.Intra Cellular, 5.Nucleus			ENSG00000125651	ASSOCIATED_GENE	GTF2F1		GTF2F1		2962			ASSOCIATED_GENE	FALSE	2962		[P35269]	2962
410								1.Extracellular	1.Extracellular, 2.Plasma Membrane, 3.Intra Cellular			ENSG00000165912	ASSOCIATED_GENE	PACSIN3		PACSIN3		29763			ASSOCIATED_GENE	FALSE	29763		[Q9UKS6]	29763
411								2.Plasma Membrane	2.Plasma Membrane, 3.Intra Cellular			ENSG00000099904	ASSOCIATED_GENE	ZDHHC8		ZDHHC8		29801			ASSOCIATED_GENE	FALSE	29801		[Q9ULC8]	29801
412								3.Intra Cellular	3.Intra Cellular, 5.Nucleus			ENSG00000115112	ASSOCIATED_GENE	TFCP2L1		TFCP2L1		29842			ASSOCIATED_GENE	FALSE	29842		[Q9NZI6]	29842
413								2.Plasma Membrane	2.Plasma Membrane, 3.Intra Cellular, 4.Nuclear Membrane, 5.Nucleus			ENSG00000101890	ASSOCIATED_GENE	GUCY2F		GUCY2F		2986			ASSOCIATED_GENE	FALSE	2986		[P51841]	2986
414								3.Intra Cellular	3.Intra Cellular			ENSG00000143774	ASSOCIATED_GENE	GUK1		GUK1		2987			ASSOCIATED_GENE	FALSE	2987		[A0A024R3U5, Q16774, Q6IBG8]	2987
415								2.Plasma Membrane	2.Plasma Membrane, 3.Intra Cellular			ENSG00000015520	ASSOCIATED_GENE	NPC1L1		NPC1L1		29881			ASSOCIATED_GENE	FALSE	29881		[A0A0C4DFX6, Q9UHC9]	29881
416								3.Intra Cellular	3.Intra Cellular, 5.Nucleus			ENSG00000134697	ASSOCIATED_GENE	GNL2		GNL2		29889			ASSOCIATED_GENE	FALSE	29889		[Q13823, Q5T0F3]	29889
417								2.Plasma Membrane	2.Plasma Membrane, 3.Intra Cellular			ENSG00000095066	ASSOCIATED_GENE	HOOK2		HOOK2		29911			ASSOCIATED_GENE	FALSE	29911		[Q96ED9]	29911
418								1.Extracellular	1.Extracellular, 3.Intra Cellular			ENSG00000173540	ASSOCIATED_GENE	GMPPB		GMPPB		29925			ASSOCIATED_GENE	FALSE	29925		[Q9Y5P6]	29925
419								1.Extracellular	1.Extracellular			ENSG00000117691	ASSOCIATED_GENE	NENF		NENF		29937			ASSOCIATED_GENE	FALSE	29937		[Q9UMX5]	29937
420								2.Plasma Membrane	2.Plasma Membrane, 3.Intra Cellular, 5.Nucleus			ENSG00000111817	ASSOCIATED_GENE	DSE		DSE		29940			ASSOCIATED_GENE	FALSE	29940		[B7Z1T3, B7Z765, Q9UL01]	29940
421								3.Intra Cellular	3.Intra Cellular			ENSG00000160447	ASSOCIATED_GENE	PKN3		PKN3		29941			ASSOCIATED_GENE	FALSE	29941		[A0A024R8D6, Q6P5Z2]	29941
422								1.Extracellular	1.Extracellular, 3.Intra Cellular, 5.Nucleus			ENSG00000142623	ASSOCIATED_GENE	PADI1		PADI1		29943			ASSOCIATED_GENE	FALSE	29943		[Q9ULC6]	29943
423								3.Intra Cellular	3.Intra Cellular, 5.Nucleus			ENSG00000105373	ASSOCIATED_GENE	NOP53		NOP53		29997			ASSOCIATED_GENE	FALSE	29997		[Q9NZM5]	29997
424								2.Plasma Membrane	2.Plasma Membrane, 3.Intra Cellular			ENSG00000147010	ASSOCIATED_GENE	SH3KBP1		SH3KBP1		30011			ASSOCIATED_GENE	FALSE	30011		[B7Z6E8, Q5JPT6, Q96B97]	30011
425								1.Extracellular	1.Extracellular, 3.Intra Cellular, 5.Nucleus			ENSG00000188486	ASSOCIATED_GENE	H2AFX		H2AFX		3014			ASSOCIATED_GENE	FALSE	3014		[P16104]	3014
426								2.Plasma Membrane	2.Plasma Membrane, 3.Intra Cellular			ENSG00000105509	ASSOCIATED_GENE	HAS1		HAS1		3036			ASSOCIATED_GENE	FALSE	3036		[D2N2G5, G3V1S7, Q8IYH3, Q92839]	3036
427								2.Plasma Membrane	2.Plasma Membrane, 3.Intra Cellular			ENSG00000160408	ASSOCIATED_GENE	ST6GALNAC6		ST6GALNAC6		30815			ASSOCIATED_GENE	FALSE	30815		[A0A024R8C6, A0A0S2Z5G9, B4DU80, F6SGE3, Q969X2]	30815
428								1.Extracellular	1.Extracellular, 3.Intra Cellular, 5.Nucleus			ENSG00000154832	ASSOCIATED_GENE	CXXC1		CXXC1		30827			ASSOCIATED_GENE	FALSE	30827		[Q9P0U4]	30827
429								1.Extracellular	1.Extracellular, 3.Intra Cellular			ENSG00000197043	ASSOCIATED_GENE	ANXA6		ANXA6		309			ASSOCIATED_GENE	FALSE	309		[A0A0S2Z2Z6, A0A0S2Z377, P08133]	309
430								1.Extracellular	1.Extracellular, 3.Intra Cellular, 5.Nucleus			ENSG00000164104	ASSOCIATED_GENE	HMGB2		HMGB2		3148			ASSOCIATED_GENE	FALSE	3148		[P26583]	3148
431								3.Intra Cellular	3.Intra Cellular			ENSG00000134240	ASSOCIATED_GENE	HMGCS2		HMGCS2		3158			ASSOCIATED_GENE	FALSE	3158		[A0A140VJL2, P54868]	3158
432								1.Extracellular	1.Extracellular, 3.Intra Cellular			ENSG00000120868	ASSOCIATED_GENE	APAF1		APAF1		317			ASSOCIATED_GENE	FALSE	317		[O14727]	317
433								3.Intra Cellular	3.Intra Cellular, 5.Nucleus			ENSG00000164749	ASSOCIATED_GENE	HNF4G		HNF4G		3174			ASSOCIATED_GENE	FALSE	3174		[F1D8Q4, Q14541]	3174
434						Transcription Factor Complex	Transcription Factor Complex	3.Intra Cellular	3.Intra Cellular, 5.Nucleus			ENSG00000197451	ASSOCIATED_GENE	HNRNPAB		HNRNPAB		3182			ASSOCIATED_GENE	FALSE	3182		[Q99729]	3182
435								3.Intra Cellular	3.Intra Cellular, 5.Nucleus			ENSG00000197576	ASSOCIATED_GENE	HOXA4		HOXA4		3201			ASSOCIATED_GENE	FALSE	3201		[Q00056]	3201
436								3.Intra Cellular	3.Intra Cellular, 5.Nucleus			ENSG00000173917	ASSOCIATED_GENE	HOXB2		HOXB2		3212			ASSOCIATED_GENE	FALSE	3212		[P14652]	3212
437								3.Intra Cellular	3.Intra Cellular, 5.Nucleus			ENSG00000123388	ASSOCIATED_GENE	HOXC11		HOXC11		3227			ASSOCIATED_GENE	FALSE	3227		[O43248]	3227
438								3.Intra Cellular	3.Intra Cellular			ENSG00000163697	ASSOCIATED_GENE	APBB2		APBB2		323			ASSOCIATED_GENE	FALSE	323		[B4DJ88, B4E2F2, G5E9Y1, Q5I0G1, Q92870]	323
439								2.Plasma Membrane	2.Plasma Membrane, 3.Intra Cellular, 5.Nucleus			ENSG00000134982	ASSOCIATED_GENE	APC		APC		324			ASSOCIATED_GENE	FALSE	324		[P25054, Q4LE70]	324
440								3.Intra Cellular	3.Intra Cellular			ENSG00000182223	ASSOCIATED_GENE	ZAR1		ZAR1		326340			ASSOCIATED_GENE	FALSE	326340		[B9EG67, Q86SH2]	326340
441								0.Annotation definition not found in 'Homo Sapiens.properties' file	0.Annotation definition not found in 'Homo Sapiens.properties' file			ENSG00000163749	ASSOCIATED_GENE	CCDC158		CCDC158		339965			ASSOCIATED_GENE	FALSE	339965		[Q5M9N0]	339965
442								1.Extracellular	1.Extracellular, 2.Plasma Membrane			ENSG00000187054	ASSOCIATED_GENE	TMPRSS11A		TMPRSS11A		339967			ASSOCIATED_GENE	FALSE	339967		[A0A0A0MR82, A8KA85, Q6ZMR5]	339967
443								3.Intra Cellular	3.Intra Cellular			ENSG00000175946	ASSOCIATED_GENE	KLHL38		KLHL38		340359			ASSOCIATED_GENE	FALSE	340359		[Q2WGJ6]	340359
444								3.Intra Cellular	3.Intra Cellular			ENSG00000050030	ASSOCIATED_GENE	NEXMIF		NEXMIF		340533			ASSOCIATED_GENE	FALSE	340533		[Q5QGS0]	340533
445								2.Plasma Membrane	2.Plasma Membrane, 3.Intra Cellular			ENSG00000187553	ASSOCIATED_GENE	CYP26C1		CYP26C1		340665			ASSOCIATED_GENE	FALSE	340665		[Q6V0L0]	340665
446								3.Intra Cellular	3.Intra Cellular			ENSG00000167612	ASSOCIATED_GENE	ANKRD33		ANKRD33		341405			ASSOCIATED_GENE	FALSE	341405		[Q0VAA8, Q5K617, Q7Z3H0]	341405
447								1.Extracellular	1.Extracellular, 3.Intra Cellular			ENSG00000138413	ASSOCIATED_GENE	IDH1		IDH1		3417			ASSOCIATED_GENE	FALSE	3417		[O75874, V9HWJ2]	3417
448								0.Annotation definition not found in 'Homo Sapiens.properties' file	0.Annotation definition not found in 'Homo Sapiens.properties' file			ENSG00000131951	ASSOCIATED_GENE	LRRC9		LRRC9		341883			ASSOCIATED_GENE	FALSE	341883			341883
449								3.Intra Cellular	3.Intra Cellular			ENSG00000166411	ASSOCIATED_GENE	IDH3A		IDH3A		3419			ASSOCIATED_GENE	FALSE	3419		[B4DJB4, B7Z9J8, P50213]	3419
450								2.Plasma Membrane	2.Plasma Membrane			ENSG00000187135	ASSOCIATED_GENE	VSTM2B		VSTM2B		342865			ASSOCIATED_GENE	FALSE	342865		[A6NLU5]	342865
451								2.Plasma Membrane	2.Plasma Membrane, 3.Intra Cellular			ENSG00000187556	ASSOCIATED_GENE	NANOS3		NANOS3		342977			ASSOCIATED_GENE	FALSE	342977		[P60323]	342977
452								2.Plasma Membrane	2.Plasma Membrane			ENSG00000162687	ASSOCIATED_GENE	KCNT2		KCNT2		343450			ASSOCIATED_GENE	FALSE	343450		[A9LNM6, Q6UVM3]	343450
453								3.Intra Cellular	3.Intra Cellular			ENSG00000188396	ASSOCIATED_GENE	TCTEX1D4		TCTEX1D4		343521			ASSOCIATED_GENE	FALSE	343521		[Q5JR98]	343521
454								3.Intra Cellular	3.Intra Cellular			ENSG00000183742	ASSOCIATED_GENE	MACC1		MACC1		346389			ASSOCIATED_GENE	FALSE	346389		[Q6ZN28]	346389
455								1.Extracellular	1.Extracellular, 3.Intra Cellular			ENSG00000167779	ASSOCIATED_GENE	IGFBP6		IGFBP6		3489			ASSOCIATED_GENE	FALSE	3489		[F8VVA5, P24592]	3489
456								2.Plasma Membrane	2.Plasma Membrane			ENSG00000164588	ASSOCIATED_GENE	HCN1		HCN1		348980			ASSOCIATED_GENE	FALSE	348980		[O60741, Q86WJ6]	348980
457								1.Extracellular	1.Extracellular, 3.Intra Cellular			ENSG00000163453	ASSOCIATED_GENE	IGFBP7		IGFBP7		3490			ASSOCIATED_GENE	FALSE	3490		[Q16270]	3490
458								2.Plasma Membrane	2.Plasma Membrane			ENSG00000176402	ASSOCIATED_GENE	GJC3		GJC3		349149			ASSOCIATED_GENE	FALSE	349149		[Q8NFK1]	349149
459								3.Intra Cellular	3.Intra Cellular			ENSG00000167646	ASSOCIATED_GENE	DNAAF3		DNAAF3		352909			ASSOCIATED_GENE	FALSE	352909		[A0A0A0MS19, A0A0C4DH50, A0A0C4DH78, A0A0C4DH81, Q8N9W5]	352909
460								3.Intra Cellular	3.Intra Cellular			ENSG00000276747	ASSOCIATED_GENE	PADI6		PADI6		353238			ASSOCIATED_GENE	FALSE	353238		[Q6TGC4]	353238
461								1.Extracellular	1.Extracellular, 3.Intra Cellular			ENSG00000186393	ASSOCIATED_GENE	KRT26		KRT26		353288			ASSOCIATED_GENE	FALSE	353288		[Q7Z3Y9]	353288
462								3.Intra Cellular	3.Intra Cellular, 5.Nucleus			ENSG00000130997	ASSOCIATED_GENE	POLN		POLN		353497			ASSOCIATED_GENE	FALSE	353497		[Q7Z5Q5]	353497
463								3.Intra Cellular	3.Intra Cellular, 5.Nucleus			ENSG00000168264	ASSOCIATED_GENE	IRF2BP2		IRF2BP2		359948			ASSOCIATED_GENE	FALSE	359948		[Q7Z5L9]	359948
464								1.Extracellular	1.Extracellular, 3.Intra Cellular			ENSG00000196177	ASSOCIATED_GENE	ACADSB		ACADSB		36			ASSOCIATED_GENE	FALSE	36		[A0A0S2Z3P9, P45954]	36
465								2.Plasma Membrane	2.Plasma Membrane, 3.Intra Cellular			ENSG00000171885	ASSOCIATED_GENE	AQP4		AQP4		361			ASSOCIATED_GENE	FALSE	361		[F1DSG4, P55087, V9PBN7]	361
466								3.Intra Cellular	3.Intra Cellular			ENSG00000136381	ASSOCIATED_GENE	IREB2		IREB2		3658			ASSOCIATED_GENE	FALSE	3658		[D3DW85, P48200]	3658
467								3.Intra Cellular	3.Intra Cellular, 5.Nucleus			ENSG00000125347	ASSOCIATED_GENE	IRF1		IRF1		3659			ASSOCIATED_GENE	FALSE	3659		[P10914, Q6FHN8, X5D3F6]	3659
468								3.Intra Cellular	3.Intra Cellular, 5.Nucleus			ENSG00000016082	ASSOCIATED_GENE	ISL1		ISL1		3670			ASSOCIATED_GENE	FALSE	3670		[P61371]	3670
469								1.Extracellular	1.Extracellular, 2.Plasma Membrane, 3.Intra Cellular			ENSG00000005961	ASSOCIATED_GENE	ITGA2B		ITGA2B		3674			ASSOCIATED_GENE	FALSE	3674		[P08514]	3674
470								2.Plasma Membrane	2.Plasma Membrane, 3.Intra Cellular			ENSG00000161638	ASSOCIATED_GENE	ITGA5		ITGA5		3678			ASSOCIATED_GENE	FALSE	3678		[B2R627, P08648]	3678
471								1.Extracellular	1.Extracellular, 2.Plasma Membrane			ENSG00000139626	ASSOCIATED_GENE	ITGB7		ITGB7		3695			ASSOCIATED_GENE	FALSE	3695		[P26010]	3695
472								3.Intra Cellular	3.Intra Cellular			ENSG00000137825	ASSOCIATED_GENE	ITPKA		ITPKA		3706			ASSOCIATED_GENE	FALSE	3706		[P23677]	3706
473								2.Plasma Membrane	2.Plasma Membrane, 3.Intra Cellular			ENSG00000105639	ASSOCIATED_GENE	JAK3		JAK3		3718			ASSOCIATED_GENE	FALSE	3718		[A0A024R7M7, P52333]	3718
474								2.Plasma Membrane	2.Plasma Membrane, 3.Intra Cellular			ENSG00000182255	ASSOCIATED_GENE	KCNA4		KCNA4		3739			ASSOCIATED_GENE	FALSE	3739		[P22459]	3739
475								2.Plasma Membrane	2.Plasma Membrane			ENSG00000139304	ASSOCIATED_GENE	PTPRQ		PTPRQ		374462			ASSOCIATED_GENE	FALSE	374462		[A0A087WZU1]	374462
476								3.Intra Cellular	3.Intra Cellular			ENSG00000186583	ASSOCIATED_GENE	SPATC1		SPATC1		375686			ASSOCIATED_GENE	FALSE	375686		[A0A140VJV4, Q76KD6]	375686
477								3.Intra Cellular	3.Intra Cellular			ENSG00000188647	ASSOCIATED_GENE	PTAR1		PTAR1		375743			ASSOCIATED_GENE	FALSE	375743		[Q7Z6K3]	375743
478								2.Plasma Membrane	2.Plasma Membrane, 3.Intra Cellular, 4.Nuclear Membrane, 5.Nucleus			ENSG00000130653	ASSOCIATED_GENE	PNPLA7		PNPLA7		375775			ASSOCIATED_GENE	FALSE	375775		[Q6ZV29]	375775
479								0.Annotation definition not found in 'Homo Sapiens.properties' file	0.Annotation definition not found in 'Homo Sapiens.properties' file			ENSG00000188086	ASSOCIATED_GENE	PRSS45		PRSS45		377047			ASSOCIATED_GENE	FALSE	377047		[Q7RTY3]	377047
480								2.Plasma Membrane	2.Plasma Membrane			ENSG00000157551	ASSOCIATED_GENE	KCNJ15		KCNJ15		3772			ASSOCIATED_GENE	FALSE	3772		[Q99712]	3772
481								2.Plasma Membrane	2.Plasma Membrane, 3.Intra Cellular			ENSG00000124134	ASSOCIATED_GENE	KCNS1		KCNS1		3787			ASSOCIATED_GENE	FALSE	3787		[A2RUL8, Q96KK3]	3787
482								3.Intra Cellular	3.Intra Cellular, 5.Nucleus			ENSG00000079616	ASSOCIATED_GENE	KIF22		KIF22		3835			ASSOCIATED_GENE	FALSE	3835		[A0A024R632, B7Z9T5, Q14807]	3835
483								3.Intra Cellular	3.Intra Cellular, 4.Nuclear Membrane, 5.Nucleus			ENSG00000065150	ASSOCIATED_GENE	IPO5		IPO5		3843			ASSOCIATED_GENE	FALSE	3843		[B3KWG6, O00410, Q9BVS9]	3843
484								2.Plasma Membrane	2.Plasma Membrane, 3.Intra Cellular			ENSG00000240849	ASSOCIATED_GENE	TMEM189		TMEM189		387521			ASSOCIATED_GENE	FALSE	387521		[A5PLL7]	387521
485								0.Annotation definition not found in 'Homo Sapiens.properties' file	0.Annotation definition not found in 'Homo Sapiens.properties' file			ENSG00000187833	ASSOCIATED_GENE	C2orf78		C2orf78		388960			ASSOCIATED_GENE	FALSE	388960		[A6NCI8]	388960
486								0.Annotation definition not found in 'Homo Sapiens.properties' file	0.Annotation definition not found in 'Homo Sapiens.properties' file			ENSG00000185028	ASSOCIATED_GENE	LRRC14B		LRRC14B		389257			ASSOCIATED_GENE	FALSE	389257		[A6NHZ5]	389257
487								3.Intra Cellular	3.Intra Cellular			ENSG00000203972	ASSOCIATED_GENE	GLYATL3		GLYATL3		389396			ASSOCIATED_GENE	FALSE	389396		[Q5SZD4]	389396
488								0.Annotation definition not found in 'Homo Sapiens.properties' file	0.Annotation definition not found in 'Homo Sapiens.properties' file			ENSG00000188523	ASSOCIATED_GENE	CFAP77		CFAP77		389799			ASSOCIATED_GENE	FALSE	389799		[A2A393, Q6ZQR2]	389799
489								0.Annotation definition not found in 'Homo Sapiens.properties' file	0.Annotation definition not found in 'Homo Sapiens.properties' file			ENSG00000180815	ASSOCIATED_GENE	MAP3K15		MAP3K15		389840			ASSOCIATED_GENE	FALSE	389840		[Q6ZN16]	389840
490								2.Plasma Membrane	2.Plasma Membrane			ENSG00000184698	ASSOCIATED_GENE	OR51M1		OR51M1		390059			ASSOCIATED_GENE	FALSE	390059		[B2RNI9, Q9H341]	390059
491						Transcription Factor Complex	Transcription Factor Complex	3.Intra Cellular	3.Intra Cellular			ENSG00000188909	ASSOCIATED_GENE	BSX		BSX		390259			ASSOCIATED_GENE	FALSE	390259		[Q3C1V8]	390259
492						Transcription Factor Complex	Transcription Factor Complex	3.Intra Cellular	3.Intra Cellular			ENSG00000188779	ASSOCIATED_GENE	SKOR1		SKOR1		390598			ASSOCIATED_GENE	FALSE	390598		[P84550]	390598
493								1.Extracellular	1.Extracellular, 3.Intra Cellular			ENSG00000135862	ASSOCIATED_GENE	LAMC1		LAMC1		3915			ASSOCIATED_GENE	FALSE	3915		[P11047, Q6NVY8]	3915
494								1.Extracellular	1.Extracellular, 2.Plasma Membrane			ENSG00000225968	ASSOCIATED_GENE	ELFN1		ELFN1		392617			ASSOCIATED_GENE	FALSE	392617		[P0C7U0]	392617
495								1.Extracellular	1.Extracellular, 2.Plasma Membrane, 3.Intra Cellular			ENSG00000182866	ASSOCIATED_GENE	LCK		LCK		3932			ASSOCIATED_GENE	FALSE	3932		[A0A0S2Z3Y4, A0A0S2Z3Y8, P06239, Q573B4]	3932
496								1.Extracellular	1.Extracellular, 2.Plasma Membrane, 3.Intra Cellular			ENSG00000074695	ASSOCIATED_GENE	LMAN1		LMAN1		3998			ASSOCIATED_GENE	FALSE	3998		[A0A024R2A7, P49257]	3998
497								3.Intra Cellular	3.Intra Cellular			ENSG00000214595	ASSOCIATED_GENE	EML6		EML6		400954			ASSOCIATED_GENE	FALSE	400954		[Q6ZMW3]	400954
498								1.Extracellular	1.Extracellular, 2.Plasma Membrane			ENSG00000175445	ASSOCIATED_GENE	LPL		LPL		4023			ASSOCIATED_GENE	FALSE	4023		[A0A1B1RVA9, P06858]	4023
499								2.Plasma Membrane	2.Plasma Membrane, 3.Intra Cellular			ENSG00000135387	ASSOCIATED_GENE	CAPRIN1		CAPRIN1		4076			ASSOCIATED_GENE	FALSE	4076		[Q14444]	4076
500								2.Plasma Membrane	2.Plasma Membrane, 3.Intra Cellular			ENSG00000105695	ASSOCIATED_GENE	MAG		MAG		4099			ASSOCIATED_GENE	FALSE	4099		[P20916, Q53ES7]	4099
501								1.Extracellular	1.Extracellular, 2.Plasma Membrane, 3.Intra Cellular			ENSG00000112893	ASSOCIATED_GENE	MAN2A1		MAN2A1		4124			ASSOCIATED_GENE	FALSE	4124		[Q16706]	4124
502								2.Plasma Membrane	2.Plasma Membrane, 3.Intra Cellular, 5.Nucleus			ENSG00000186868	ASSOCIATED_GENE	MAPT		MAPT		4137			ASSOCIATED_GENE	FALSE	4137		[A0A024R9Y0, A0A024R9Y1, A0A024RA17, A0A024RA19, B3KTM0, P10636]	4137
503								1.Extracellular	1.Extracellular, 3.Intra Cellular			ENSG00000132031	ASSOCIATED_GENE	MATN3		MATN3		4148			ASSOCIATED_GENE	FALSE	4148		[O15232]	4148
504								2.Plasma Membrane	2.Plasma Membrane, 3.Intra Cellular			ENSG00000183196	ASSOCIATED_GENE	CHST6		CHST6		4166			ASSOCIATED_GENE	FALSE	4166		[Q9GZX3]	4166
505								1.Extracellular	1.Extracellular, 3.Intra Cellular			ENSG00000014641	ASSOCIATED_GENE	MDH1		MDH1		4190			ASSOCIATED_GENE	FALSE	4190		[P40925, V9HWF2]	4190
506								1.Extracellular	1.Extracellular, 3.Intra Cellular			ENSG00000169057	ASSOCIATED_GENE	MECP2		MECP2		4204			ASSOCIATED_GENE	FALSE	4204		[A0A140VKC4, D3YJ43, P51608, Q59FJ6]	4204
507								1.Extracellular	1.Extracellular, 2.Plasma Membrane, 3.Intra Cellular			ENSG00000167461	ASSOCIATED_GENE	RAB8A		RAB8A		4218			ASSOCIATED_GENE	FALSE	4218		[A0A024R7I3, P61006]	4218
508								1.Extracellular	1.Extracellular, 2.Plasma Membrane, 3.Intra Cellular			ENSG00000140545	ASSOCIATED_GENE	MFGE8		MFGE8		4240			ASSOCIATED_GENE	FALSE	4240		[B3KTQ2, B4E396, F5GZN3, Q08431, X6R3G6]	4240
509								3.Intra Cellular	3.Intra Cellular, 5.Nucleus			ENSG00000130382	ASSOCIATED_GENE	MLLT1		MLLT1		4298			ASSOCIATED_GENE	FALSE	4298		[Q03111]	4298
510								2.Plasma Membrane	2.Plasma Membrane, 3.Intra Cellular			ENSG00000253148	ASSOCIATED_GENE	RGS21		RGS21		431704			ASSOCIATED_GENE	FALSE	431704		[Q2M5E4]	431704
511								2.Plasma Membrane	2.Plasma Membrane			ENSG00000182652	ASSOCIATED_GENE	OR4Q3		OR4Q3		441669			ASSOCIATED_GENE	FALSE	441669		[A0A126GW32, Q8NH05]	441669
512								2.Plasma Membrane	2.Plasma Membrane			ENSG00000244694	ASSOCIATED_GENE	PTCHD4		PTCHD4		442213			ASSOCIATED_GENE	FALSE	442213		[Q6ZW05]	442213
513								0.Annotation definition not found in 'Homo Sapiens.properties' file	0.Annotation definition not found in 'Homo Sapiens.properties' file				ASSOCIATED_GENE	NEPNP		NEPNP		442253			ASSOCIATED_GENE	FALSE	442253			442253
514								3.Intra Cellular	3.Intra Cellular, 5.Nucleus			ENSG00000113318	ASSOCIATED_GENE	MSH3		MSH3		4437			ASSOCIATED_GENE	FALSE	4437		[P20585]	4437
515								1.Extracellular	1.Extracellular, 2.Plasma Membrane, 3.Intra Cellular			ENSG00000147065	ASSOCIATED_GENE	MSN		MSN		4478			ASSOCIATED_GENE	FALSE	4478		[P26038, V9HWC0]	4478
516								1.Extracellular	1.Extracellular			ENSG00000173531	ASSOCIATED_GENE	MST1		MST1		4485			ASSOCIATED_GENE	FALSE	4485		[G3XAK1, P26927, Q53GN8]	4485
517								2.Plasma Membrane	2.Plasma Membrane, 3.Intra Cellular, 4.Nuclear Membrane, 5.Nucleus			ENSG00000157601	ASSOCIATED_GENE	MX1		MX1		4599			ASSOCIATED_GENE	FALSE	4599		[P20591]	4599
518								2.Plasma Membrane	2.Plasma Membrane, 3.Intra Cellular			ENSG00000152092	ASSOCIATED_GENE	ASTN1		ASTN1		460			ASSOCIATED_GENE	FALSE	460		[A6H8Y4, B1AJS1, O14525]	460
519								1.Extracellular	1.Extracellular, 3.Intra Cellular			ENSG00000133026	ASSOCIATED_GENE	MYH10		MYH10		4628			ASSOCIATED_GENE	FALSE	4628		[G1UI33, P35580]	4628
520								1.Extracellular	1.Extracellular, 3.Intra Cellular			ENSG00000197535	ASSOCIATED_GENE	MYO5A		MYO5A		4644			ASSOCIATED_GENE	FALSE	4644		[A8CDT9, Q9UES4, Q9Y4I1]	4644
521								1.Extracellular	1.Extracellular, 2.Plasma Membrane, 3.Intra Cellular, 4.Nuclear Membrane, 5.Nucleus			ENSG00000196586	ASSOCIATED_GENE	MYO6		MYO6		4646			ASSOCIATED_GENE	FALSE	4646		[A0A0A0MRM8, A0A0D9SGC1, A0A1Y0BRN3, Q9UM54]	4646
522								3.Intra Cellular	3.Intra Cellular, 5.Nucleus			ENSG00000077157	ASSOCIATED_GENE	PPP1R12B		PPP1R12B		4660			ASSOCIATED_GENE	FALSE	4660		[A0A0A0MS24, E1CKY7, O60237]	4660
523								3.Intra Cellular	3.Intra Cellular			ENSG00000205531	ASSOCIATED_GENE	NAP1L4		NAP1L4		4676			ASSOCIATED_GENE	FALSE	4676		[A0A024RCC9, Q99733]	4676
524								2.Plasma Membrane	2.Plasma Membrane, 3.Intra Cellular			ENSG00000167792	ASSOCIATED_GENE	NDUFV1		NDUFV1		4723			ASSOCIATED_GENE	FALSE	4723		[E5KNH5, P49821]	4723
525								3.Intra Cellular	3.Intra Cellular			ENSG00000133561	ASSOCIATED_GENE	GIMAP6		GIMAP6		474344			ASSOCIATED_GENE	FALSE	474344		[A0A090N7V4, B4DH95, Q6P9H5]	474344
526								3.Intra Cellular	3.Intra Cellular			ENSG00000165383	ASSOCIATED_GENE	LRRC18		LRRC18		474354			ASSOCIATED_GENE	FALSE	474354		[Q8N456]	474354
527								3.Intra Cellular	3.Intra Cellular			ENSG00000136098	ASSOCIATED_GENE	NEK3		NEK3		4752			ASSOCIATED_GENE	FALSE	4752		[P51956, Q6ZN64]	4752
528								2.Plasma Membrane	2.Plasma Membrane, 3.Intra Cellular			ENSG00000169418	ASSOCIATED_GENE	NPR1		NPR1		4881			ASSOCIATED_GENE	FALSE	4881		[A0A140VJE6, P16066]	4881
529								2.Plasma Membrane	2.Plasma Membrane, 3.Intra Cellular			ENSG00000159899	ASSOCIATED_GENE	NPR2		NPR2		4882			ASSOCIATED_GENE	FALSE	4882		[P20594]	4882
530								2.Plasma Membrane	2.Plasma Membrane, 3.Intra Cellular, 4.Nuclear Membrane, 5.Nucleus			ENSG00000074370	ASSOCIATED_GENE	ATP2A3		ATP2A3		489			ASSOCIATED_GENE	FALSE	489		[A8K9K1, Q93084]	489
531								1.Extracellular	1.Extracellular, 2.Plasma Membrane, 3.Intra Cellular, 5.Nucleus			ENSG00000137497	ASSOCIATED_GENE	NUMA1		NUMA1		4926			ASSOCIATED_GENE	FALSE	4926		[A0A024R5M9, Q14980, Q3SYK8, Q4LE64]	4926
532								3.Intra Cellular	3.Intra Cellular, 4.Nuclear Membrane, 5.Nucleus			ENSG00000110713	ASSOCIATED_GENE	NUP98		NUP98		4928			ASSOCIATED_GENE	FALSE	4928		[P52948]	4928
533								1.Extracellular	1.Extracellular, 2.Plasma Membrane, 3.Intra Cellular			ENSG00000058668	ASSOCIATED_GENE	ATP2B4		ATP2B4		493			ASSOCIATED_GENE	FALSE	493		[A0A024R968, P23634]	493
534								2.Plasma Membrane	2.Plasma Membrane, 3.Intra Cellular			ENSG00000177238	ASSOCIATED_GENE	TRIM72		TRIM72		493829			ASSOCIATED_GENE	FALSE	493829		[Q6ZMU5]	493829
535								3.Intra Cellular	3.Intra Cellular			ENSG00000141622	ASSOCIATED_GENE	RNF165		RNF165		494470			ASSOCIATED_GENE	FALSE	494470		[A0A059NXK6, Q6ZSG1]	494470
536								0.Annotation definition not found in 'Homo Sapiens.properties' file	0.Annotation definition not found in 'Homo Sapiens.properties' file			ENSG00000204311	ASSOCIATED_GENE	PJVK		PJVK		494513			ASSOCIATED_GENE	FALSE	494513		[A0PK15, Q0ZLH3]	494513
537								2.Plasma Membrane	2.Plasma Membrane, 3.Intra Cellular			ENSG00000116329	ASSOCIATED_GENE	OPRD1		OPRD1		4985			ASSOCIATED_GENE	FALSE	4985		[P41143]	4985
538								3.Intra Cellular	3.Intra Cellular, 5.Nucleus			ENSG00000173276	ASSOCIATED_GENE	ZBTB21		ZBTB21		49854			ASSOCIATED_GENE	FALSE	49854		[Q5H9S0, Q9ULJ3]	49854
539								3.Intra Cellular	3.Intra Cellular, 5.Nucleus			ENSG00000115947	ASSOCIATED_GENE	ORC4		ORC4		5000			ASSOCIATED_GENE	FALSE	5000		[A8K7H4, O43929, Q96B14]	5000
540								1.Extracellular	1.Extracellular, 3.Intra Cellular			ENSG00000085465	ASSOCIATED_GENE	OVGP1		OVGP1		5016			ASSOCIATED_GENE	FALSE	5016		[Q12889, Q86YN0]	5016
541								2.Plasma Membrane	2.Plasma Membrane, 3.Intra Cellular, 4.Nuclear Membrane, 5.Nucleus			ENSG00000089041	ASSOCIATED_GENE	P2RX7		P2RX7		5027			ASSOCIATED_GENE	FALSE	5027		[Q99572]	5027
542								1.Extracellular	1.Extracellular, 2.Plasma Membrane, 3.Intra Cellular			ENSG00000140564	ASSOCIATED_GENE	FURIN		FURIN		5045			ASSOCIATED_GENE	FALSE	5045		[A0A024RC70, P09958]	5045
543								1.Extracellular	1.Extracellular, 3.Intra Cellular			ENSG00000171759	ASSOCIATED_GENE	PAH		PAH		5053			ASSOCIATED_GENE	FALSE	5053		[A0A024RBG4, P00439]	5053
544								3.Intra Cellular	3.Intra Cellular, 5.Nucleus			ENSG00000127483	ASSOCIATED_GENE	HP1BP3		HP1BP3		50809			ASSOCIATED_GENE	FALSE	50809		[Q5SSJ5]	50809
545								2.Plasma Membrane	2.Plasma Membrane, 3.Intra Cellular			ENSG00000147383	ASSOCIATED_GENE	NSDHL		NSDHL		50814			ASSOCIATED_GENE	FALSE	50814		[Q15738]	50814
546								1.Extracellular	1.Extracellular, 3.Intra Cellular, 5.Nucleus			ENSG00000169564	ASSOCIATED_GENE	PCBP1		PCBP1		5093			ASSOCIATED_GENE	FALSE	5093		[Q15365, Q53SS8]	5093
547								3.Intra Cellular	3.Intra Cellular, 5.Nucleus			ENSG00000156469	ASSOCIATED_GENE	MTERF3		MTERF3		51001			ASSOCIATED_GENE	FALSE	51001		[E5RIK9, Q96E29]	51001
548						Transcription Factor Complex	Transcription Factor Complex	3.Intra Cellular	3.Intra Cellular, 5.Nucleus			ENSG00000108590	ASSOCIATED_GENE	MED31		MED31		51003			ASSOCIATED_GENE	FALSE	51003		[Q9Y3C7]	51003
549								2.Plasma Membrane	2.Plasma Membrane			ENSG00000184226	ASSOCIATED_GENE	PCDH9		PCDH9		5101			ASSOCIATED_GENE	FALSE	5101		[A7E2D9, B7ZM79, Q5VT82, Q9HC56, X5D7N0]	5101
550								2.Plasma Membrane	2.Plasma Membrane, 3.Intra Cellular			ENSG00000162191	ASSOCIATED_GENE	UBXN1		UBXN1		51035			ASSOCIATED_GENE	FALSE	51035		[A0A024R539, A0A024R598, A0A087WTZ5, B4DNC6, Q04323]	51035
551								3.Intra Cellular	3.Intra Cellular, 5.Nucleus			ENSG00000131263	ASSOCIATED_GENE	RLIM		RLIM		51132			ASSOCIATED_GENE	FALSE	51132		[Q9NVW2]	51132
552								2.Plasma Membrane	2.Plasma Membrane, 3.Intra Cellular			ENSG00000118017	ASSOCIATED_GENE	A4GNT		A4GNT		51146			ASSOCIATED_GENE	FALSE	51146		[Q9UNA3]	51146
553								1.Extracellular	1.Extracellular, 2.Plasma Membrane, 3.Intra Cellular			ENSG00000078808	ASSOCIATED_GENE	SDF4		SDF4		51150			ASSOCIATED_GENE	FALSE	51150		[A0A024R084, A0A024R0A9, Q9BRK5]	51150
554								3.Intra Cellular	3.Intra Cellular, 5.Nucleus			ENSG00000053372	ASSOCIATED_GENE	MRTO4		MRTO4		51154			ASSOCIATED_GENE	FALSE	51154		[A0A024RAE1, Q9UKD2]	51154
555								3.Intra Cellular	3.Intra Cellular			ENSG00000187522	ASSOCIATED_GENE	HSPA14		HSPA14		51182			ASSOCIATED_GENE	FALSE	51182		[B0YIZ1, Q0VDF9, Q8TAQ0]	51182
556								3.Intra Cellular	3.Intra Cellular, 5.Nucleus			ENSG00000137804	ASSOCIATED_GENE	NUSAP1		NUSAP1		51203			ASSOCIATED_GENE	FALSE	51203		[Q9BXS6]	51203
557								3.Intra Cellular	3.Intra Cellular			ENSG00000136463	ASSOCIATED_GENE	TACO1		TACO1		51204			ASSOCIATED_GENE	FALSE	51204		[Q9BSH4]	51204
558								3.Intra Cellular	3.Intra Cellular			ENSG00000162836	ASSOCIATED_GENE	ACP6		ACP6		51205			ASSOCIATED_GENE	FALSE	51205		[Q9NPH0, X5D289]	51205
559								3.Intra Cellular	3.Intra Cellular			ENSG00000108798	ASSOCIATED_GENE	ABI3		ABI3		51225			ASSOCIATED_GENE	FALSE	51225		[Q9P2A4]	51225
560								1.Extracellular	1.Extracellular, 2.Plasma Membrane, 3.Intra Cellular			ENSG00000120509	ASSOCIATED_GENE	PDZD11		PDZD11		51248			ASSOCIATED_GENE	FALSE	51248		[Q5EBL8]	51248
561								2.Plasma Membrane	2.Plasma Membrane			ENSG00000159596	ASSOCIATED_GENE	TMEM69		TMEM69		51249			ASSOCIATED_GENE	FALSE	51249		[Q5SWH9]	51249
562								3.Intra Cellular	3.Intra Cellular			ENSG00000108826	ASSOCIATED_GENE	MRPL27		MRPL27		51264			ASSOCIATED_GENE	FALSE	51264		[Q9P0M9]	51264
563								2.Plasma Membrane	2.Plasma Membrane, 3.Intra Cellular			ENSG00000182022	ASSOCIATED_GENE	CHST15		CHST15		51363			ASSOCIATED_GENE	FALSE	51363		[B4DH74, Q7LFX5]	51363
564								2.Plasma Membrane	2.Plasma Membrane, 3.Intra Cellular			ENSG00000172572	ASSOCIATED_GENE	PDE3A		PDE3A		5139			ASSOCIATED_GENE	FALSE	5139		[Q14432]	5139
565								3.Intra Cellular	3.Intra Cellular, 5.Nucleus			ENSG00000183258	ASSOCIATED_GENE	DDX41		DDX41		51428			ASSOCIATED_GENE	FALSE	51428		[B3KRK2, Q9UJV9]	51428
566								2.Plasma Membrane	2.Plasma Membrane			ENSG00000095464	ASSOCIATED_GENE	PDE6C		PDE6C		5146			ASSOCIATED_GENE	FALSE	5146		[P51160]	5146
567								3.Intra Cellular	3.Intra Cellular, 5.Nucleus			ENSG00000137770	ASSOCIATED_GENE	CTDSPL2		CTDSPL2		51496			ASSOCIATED_GENE	FALSE	51496		[A0A024R5Q8, Q05D32]	51496
568								1.Extracellular	1.Extracellular, 3.Intra Cellular			ENSG00000197461	ASSOCIATED_GENE	PDGFA		PDGFA		5154			ASSOCIATED_GENE	FALSE	5154		[P04085]	5154
569								3.Intra Cellular	3.Intra Cellular, 5.Nucleus			ENSG00000143952	ASSOCIATED_GENE	VPS54		VPS54		51542			ASSOCIATED_GENE	FALSE	51542		[Q9P1Q0]	51542
570								3.Intra Cellular	3.Intra Cellular			ENSG00000100628	ASSOCIATED_GENE	ASB2		ASB2		51676			ASSOCIATED_GENE	FALSE	51676		[A0A024R6E7, Q96Q27]	51676
571								1.Extracellular	1.Extracellular, 2.Plasma Membrane			ENSG00000105926	ASSOCIATED_GENE	MPP6		MPP6		51678			ASSOCIATED_GENE	FALSE	51678		[A0A024RA25, B8ZZG1, Q9NZW5]	51678
572								3.Intra Cellular	3.Intra Cellular, 5.Nucleus			ENSG00000087095	ASSOCIATED_GENE	NLK		NLK		51701			ASSOCIATED_GENE	FALSE	51701		[A0A024QZ12, Q9UBE8]	51701
573								3.Intra Cellular	3.Intra Cellular			ENSG00000090520	ASSOCIATED_GENE	DNAJB11		DNAJB11		51726			ASSOCIATED_GENE	FALSE	51726		[Q9UBS4]	51726
574								1.Extracellular	1.Extracellular, 2.Plasma Membrane, 3.Intra Cellular			ENSG00000164307	ASSOCIATED_GENE	ERAP1		ERAP1		51752			ASSOCIATED_GENE	FALSE	51752		[Q9NZ08]	51752
575								1.Extracellular	1.Extracellular, 2.Plasma Membrane, 3.Intra Cellular, 5.Nucleus			ENSG00000166128	ASSOCIATED_GENE	RAB8B		RAB8B		51762			ASSOCIATED_GENE	FALSE	51762		[Q92930]	51762
576								3.Intra Cellular	3.Intra Cellular, 5.Nucleus			ENSG00000164902	ASSOCIATED_GENE	PHAX		PHAX		51808			ASSOCIATED_GENE	FALSE	51808		[Q9H814]	51808
577								1.Extracellular	1.Extracellular, 3.Intra Cellular			ENSG00000127980	ASSOCIATED_GENE	PEX1		PEX1		5189			ASSOCIATED_GENE	FALSE	5189		[A0A0C4DG33, B4DER6, O43933]	5189
578								3.Intra Cellular	3.Intra Cellular, 5.Nucleus			ENSG00000170525	ASSOCIATED_GENE	PFKFB3		PFKFB3		5209			ASSOCIATED_GENE	FALSE	5209		[A0A1W2PR17, B7Z8A0, Q16875]	5209
579								1.Extracellular	1.Extracellular, 3.Intra Cellular			ENSG00000067057	ASSOCIATED_GENE	PFKP		PFKP		5214			ASSOCIATED_GENE	FALSE	5214		[Q01813]	5214
580								2.Plasma Membrane	2.Plasma Membrane, 3.Intra Cellular			ENSG00000102893	ASSOCIATED_GENE	PHKB		PHKB		5257			ASSOCIATED_GENE	FALSE	5257		[Q93100]	5257
581								3.Intra Cellular	3.Intra Cellular			ENSG00000156873	ASSOCIATED_GENE	PHKG2		PHKG2		5261			ASSOCIATED_GENE	FALSE	5261		[P15735]	5261
582								1.Extracellular	1.Extracellular, 2.Plasma Membrane, 3.Intra Cellular			ENSG00000118762	ASSOCIATED_GENE	PKD2		PKD2		5311			ASSOCIATED_GENE	FALSE	5311		[Q13563, Q9UEU6]	5311
583								1.Extracellular	1.Extracellular, 3.Intra Cellular			ENSG00000143627	ASSOCIATED_GENE	PKLR		PKLR		5313			ASSOCIATED_GENE	FALSE	5313		[P30613]	5313
584								1.Extracellular	1.Extracellular, 3.Intra Cellular			ENSG00000067225	ASSOCIATED_GENE	PKM		PKM		5315			ASSOCIATED_GENE	FALSE	5315		[A0A024R5Z9, B4DNK4, P14618, V9HWB8]	5315
585								1.Extracellular	1.Extracellular, 2.Plasma Membrane, 3.Intra Cellular, 5.Nucleus			ENSG00000081277	ASSOCIATED_GENE	PKP1		PKP1		5317			ASSOCIATED_GENE	FALSE	5317		[A0A024R952, Q13835]	5317
586								1.Extracellular	1.Extracellular, 2.Plasma Membrane, 3.Intra Cellular			ENSG00000011422	ASSOCIATED_GENE	PLAUR		PLAUR		5329			ASSOCIATED_GENE	FALSE	5329		[M0R1I2, Q03405]	5329
587								3.Intra Cellular	3.Intra Cellular, 5.Nucleus			ENSG00000149782	ASSOCIATED_GENE	PLCB3		PLCB3		5331			ASSOCIATED_GENE	FALSE	5331		[Q01970]	5331
588								3.Intra Cellular	3.Intra Cellular			ENSG00000101333	ASSOCIATED_GENE	PLCB4		PLCB4		5332			ASSOCIATED_GENE	FALSE	5332		[Q15147]	5332
589								1.Extracellular	1.Extracellular, 2.Plasma Membrane, 3.Intra Cellular			ENSG00000187091	ASSOCIATED_GENE	PLCD1		PLCD1		5333			ASSOCIATED_GENE	FALSE	5333		[A8K8F9, P51178]	5333
590								3.Intra Cellular	3.Intra Cellular, 5.Nucleus			ENSG00000119866	ASSOCIATED_GENE	BCL11A		BCL11A		53335			ASSOCIATED_GENE	FALSE	53335		[D6W5D9, D9YZV9, Q9H165]	53335
591								2.Plasma Membrane	2.Plasma Membrane, 3.Intra Cellular			ENSG00000148082	ASSOCIATED_GENE	SHC3		SHC3		53358			ASSOCIATED_GENE	FALSE	53358		[Q92529]	53358
592								2.Plasma Membrane	2.Plasma Membrane, 3.Intra Cellular			ENSG00000168818	ASSOCIATED_GENE	STX18		STX18		53407			ASSOCIATED_GENE	FALSE	53407		[Q9P2W9]	53407
593								1.Extracellular	1.Extracellular, 2.Plasma Membrane, 3.Intra Cellular			ENSG00000115956	ASSOCIATED_GENE	PLEK		PLEK		5341			ASSOCIATED_GENE	FALSE	5341		[P08567]	5341
594								1.Extracellular	1.Extracellular, 3.Intra Cellular, 5.Nucleus			ENSG00000115592	ASSOCIATED_GENE	PRKAG3		PRKAG3		53632			ASSOCIATED_GENE	FALSE	53632		[A0A024R426, Q9UGI9]	53632
595								1.Extracellular	1.Extracellular, 2.Plasma Membrane			ENSG00000168081	ASSOCIATED_GENE	PNOC		PNOC		5368			ASSOCIATED_GENE	FALSE	5368		[Q13519]	5368
596								3.Intra Cellular	3.Intra Cellular			ENSG00000095777	ASSOCIATED_GENE	MYO3A		MYO3A		53904			ASSOCIATED_GENE	FALSE	53904		[Q8NEV4]	53904
597								3.Intra Cellular	3.Intra Cellular			ENSG00000186088	ASSOCIATED_GENE	GSAP		GSAP		54103			ASSOCIATED_GENE	FALSE	54103		[A4D1B5]	54103
598								2.Plasma Membrane	2.Plasma Membrane, 3.Intra Cellular, 5.Nucleus			ENSG00000100941	ASSOCIATED_GENE	PNN		PNN		5411			ASSOCIATED_GENE	FALSE	5411		[Q9H307]	5411
599								2.Plasma Membrane	2.Plasma Membrane, 3.Intra Cellular, 5.Nucleus			ENSG00000177084	ASSOCIATED_GENE	POLE		POLE		5426			ASSOCIATED_GENE	FALSE	5426		[Q07864]	5426
600								2.Plasma Membrane	2.Plasma Membrane			ENSG00000112494	ASSOCIATED_GENE	UNC93A		UNC93A		54346			ASSOCIATED_GENE	FALSE	54346		[Q86WB7]	54346
601								0.Annotation definition not found in 'Homo Sapiens.properties' file	0.Annotation definition not found in 'Homo Sapiens.properties' file			ENSG00000037637	ASSOCIATED_GENE	FBXO42		FBXO42		54455			ASSOCIATED_GENE	FALSE	54455		[A0A024QZB0, Q6P3S6]	54455
602								3.Intra Cellular	3.Intra Cellular			ENSG00000001629	ASSOCIATED_GENE	ANKIB1		ANKIB1		54467			ASSOCIATED_GENE	FALSE	54467		[Q9P2G1]	54467
603								3.Intra Cellular	3.Intra Cellular, 5.Nucleus			ENSG00000175054	ASSOCIATED_GENE	ATR		ATR		545			ASSOCIATED_GENE	FALSE	545		[Q13535]	545
604								1.Extracellular	1.Extracellular, 3.Intra Cellular			ENSG00000143382	ASSOCIATED_GENE	ADAMTSL4		ADAMTSL4		54507			ASSOCIATED_GENE	FALSE	54507		[B7ZMJ3, Q6UY14, Q9UFG7]	54507
605								2.Plasma Membrane	2.Plasma Membrane			ENSG00000189184	ASSOCIATED_GENE	PCDH18		PCDH18		54510			ASSOCIATED_GENE	FALSE	54510		[Q5HYG2, Q9HCL0]	54510
606								3.Intra Cellular	3.Intra Cellular			ENSG00000150712	ASSOCIATED_GENE	MTMR12		MTMR12		54545			ASSOCIATED_GENE	FALSE	54545		[Q9C0I1]	54545
607								2.Plasma Membrane	2.Plasma Membrane, 3.Intra Cellular, 5.Nucleus			ENSG00000151615	ASSOCIATED_GENE	POU4F2		POU4F2		5458			ASSOCIATED_GENE	FALSE	5458		[Q12837]	5458
608								3.Intra Cellular	3.Intra Cellular			ENSG00000065371	ASSOCIATED_GENE	ROPN1		ROPN1		54763			ASSOCIATED_GENE	FALSE	54763		[A0A140VKB2, Q9HAT0]	54763
609								2.Plasma Membrane	2.Plasma Membrane			ENSG00000165023	ASSOCIATED_GENE	DIRAS2		DIRAS2		54769			ASSOCIATED_GENE	FALSE	54769		[Q96HU8]	54769
610								1.Extracellular	1.Extracellular, 3.Intra Cellular			ENSG00000168938	ASSOCIATED_GENE	PPIC		PPIC		5480			ASSOCIATED_GENE	FALSE	5480		[P45877]	5480
611								3.Intra Cellular	3.Intra Cellular, 5.Nucleus			ENSG00000141376	ASSOCIATED_GENE	BCAS3		BCAS3		54828			ASSOCIATED_GENE	FALSE	54828		[K7ESE9, Q05D99, Q9H6U6]	54828
612								3.Intra Cellular	3.Intra Cellular			ENSG00000137821	ASSOCIATED_GENE	LRRC49		LRRC49		54839			ASSOCIATED_GENE	FALSE	54839		[B7Z7G0, H0YNV5, Q8IUZ0]	54839
613								3.Intra Cellular	3.Intra Cellular			ENSG00000074603	ASSOCIATED_GENE	DPP8		DPP8		54878			ASSOCIATED_GENE	FALSE	54878		[A0A024R5Z6, A8K4U2, B4DLA8, Q6V1X1]	54878
614								1.Extracellular	1.Extracellular, 2.Plasma Membrane, 3.Intra Cellular			ENSG00000118898	ASSOCIATED_GENE	PPL		PPL		5493			ASSOCIATED_GENE	FALSE	5493		[O60437]	5493
615								3.Intra Cellular	3.Intra Cellular, 5.Nucleus			ENSG00000116863	ASSOCIATED_GENE	ADPRHL2		ADPRHL2		54936			ASSOCIATED_GENE	FALSE	54936		[B7ZAN4, Q9NX46]	54936
616								3.Intra Cellular	3.Intra Cellular			ENSG00000177692	ASSOCIATED_GENE	DNAJC28		DNAJC28		54943			ASSOCIATED_GENE	FALSE	54943		[Q9NX36]	54943
617								3.Intra Cellular	3.Intra Cellular			ENSG00000198276	ASSOCIATED_GENE	UCKL1		UCKL1		54963			ASSOCIATED_GENE	FALSE	54963		[Q53HM1, Q9NWZ5]	54963
618								1.Extracellular	1.Extracellular, 2.Plasma Membrane, 3.Intra Cellular, 5.Nucleus			ENSG00000172531	ASSOCIATED_GENE	PPP1CA		PPP1CA		5499			ASSOCIATED_GENE	FALSE	5499		[A0A140VJS9, P62136]	5499
619								1.Extracellular	1.Extracellular			ENSG00000075234	ASSOCIATED_GENE	TTC38		TTC38		55020			ASSOCIATED_GENE	FALSE	55020		[Q5R3I4]	55020
620								0.Annotation definition not found in 'Homo Sapiens.properties' file	0.Annotation definition not found in 'Homo Sapiens.properties' file			ENSG00000155393	ASSOCIATED_GENE	HEATR3		HEATR3		55027			ASSOCIATED_GENE	FALSE	55027		[Q7Z4Q2]	55027
621								3.Intra Cellular	3.Intra Cellular			ENSG00000075643	ASSOCIATED_GENE	MOCOS		MOCOS		55034			ASSOCIATED_GENE	FALSE	55034		[Q96EN8]	55034
622								3.Intra Cellular	3.Intra Cellular			ENSG00000242485	ASSOCIATED_GENE	MRPL20		MRPL20		55052			ASSOCIATED_GENE	FALSE	55052		[Q9BYC9]	55052
623								1.Extracellular	1.Extracellular, 2.Plasma Membrane			ENSG00000143502	ASSOCIATED_GENE	SUSD4		SUSD4		55061			ASSOCIATED_GENE	FALSE	55061		[A0A140VK55, B3KTY0, B7Z469, Q5VX71]	55061
624								3.Intra Cellular	3.Intra Cellular			ENSG00000162849	ASSOCIATED_GENE	KIF26B		KIF26B		55083			ASSOCIATED_GENE	FALSE	55083		[B7WPD9, Q2KJY2]	55083
625								1.Extracellular	1.Extracellular, 3.Intra Cellular			ENSG00000126870	ASSOCIATED_GENE	WDR60		WDR60		55112			ASSOCIATED_GENE	FALSE	55112		[A0A140VK66, Q8WVS4]	55112
626								3.Intra Cellular	3.Intra Cellular, 5.Nucleus			ENSG00000134014	ASSOCIATED_GENE	ELP3		ELP3		55140			ASSOCIATED_GENE	FALSE	55140		[B4DKA4, B4DXV1, Q9H9T3]	55140
627								1.Extracellular	1.Extracellular, 3.Intra Cellular, 5.Nucleus			ENSG00000134690	ASSOCIATED_GENE	CDCA8		CDCA8		55143			ASSOCIATED_GENE	FALSE	55143		[Q53HL2]	55143
628								3.Intra Cellular	3.Intra Cellular, 5.Nucleus			ENSG00000140525	ASSOCIATED_GENE	FANCI		FANCI		55215			ASSOCIATED_GENE	FALSE	55215		[B3KNW8, Q9NVI1]	55215
629								3.Intra Cellular	3.Intra Cellular			ENSG00000073711	ASSOCIATED_GENE	PPP2R3A		PPP2R3A		5523			ASSOCIATED_GENE	FALSE	5523		[Q06190]	5523
630								1.Extracellular	1.Extracellular, 2.Plasma Membrane, 3.Intra Cellular			ENSG00000183853	ASSOCIATED_GENE	KIRREL1		KIRREL1		55243			ASSOCIATED_GENE	FALSE	55243		[B4DN67, Q96J84]	55243
631								3.Intra Cellular	3.Intra Cellular, 5.Nucleus			ENSG00000143970	ASSOCIATED_GENE	ASXL2		ASXL2		55252			ASSOCIATED_GENE	FALSE	55252		[Q76L83]	55252
632								3.Intra Cellular	3.Intra Cellular			ENSG00000165209	ASSOCIATED_GENE	STRBP		STRBP		55342			ASSOCIATED_GENE	FALSE	55342		[A0A0S2Z5K8, Q96SI9, V9HWK4]	55342
633								3.Intra Cellular	3.Intra Cellular			ENSG00000181192	ASSOCIATED_GENE	DHTKD1		DHTKD1		55526			ASSOCIATED_GENE	FALSE	55526		[Q96HY7]	55526
634								2.Plasma Membrane	2.Plasma Membrane			ENSG00000066557	ASSOCIATED_GENE	LRRC40		LRRC40		55631			ASSOCIATED_GENE	FALSE	55631		[A0A140VJN3, Q9H9A6]	55631
635								3.Intra Cellular	3.Intra Cellular			ENSG00000165801	ASSOCIATED_GENE	ARHGEF40		ARHGEF40		55701			ASSOCIATED_GENE	FALSE	55701		[Q8TER5]	55701
636								3.Intra Cellular	3.Intra Cellular			ENSG00000078177	ASSOCIATED_GENE	N4BP2		N4BP2		55728			ASSOCIATED_GENE	FALSE	55728		[B2ZZ87, Q86UW6]	55728
637								3.Intra Cellular	3.Intra Cellular, 5.Nucleus			ENSG00000104299	ASSOCIATED_GENE	INTS9		INTS9		55756			ASSOCIATED_GENE	FALSE	55756		[Q9NV88]	55756
638								3.Intra Cellular	3.Intra Cellular			ENSG00000102595	ASSOCIATED_GENE	UGGT2		UGGT2		55757			ASSOCIATED_GENE	FALSE	55757		[Q05D90, Q9NYU1]	55757
639								3.Intra Cellular	3.Intra Cellular, 5.Nucleus			ENSG00000035499	ASSOCIATED_GENE	DEPDC1B		DEPDC1B		55789			ASSOCIATED_GENE	FALSE	55789		[Q8WUY9]	55789
640								2.Plasma Membrane	2.Plasma Membrane, 3.Intra Cellular			ENSG00000113269	ASSOCIATED_GENE	RNF130		RNF130		55819			ASSOCIATED_GENE	FALSE	55819		[E5RI87, Q2HIY3, Q86XS8]	55819
641								3.Intra Cellular	3.Intra Cellular, 5.Nucleus			ENSG00000111203	ASSOCIATED_GENE	ITFG2		ITFG2		55846			ASSOCIATED_GENE	FALSE	55846		[A0A0S2Z5G6, A0A0S2Z5P1, Q969R8]	55846
642								2.Plasma Membrane	2.Plasma Membrane, 3.Intra Cellular, 5.Nucleus			ENSG00000147099	ASSOCIATED_GENE	HDAC8		HDAC8		55869			ASSOCIATED_GENE	FALSE	55869		[Q9BY41]	55869
643								2.Plasma Membrane	2.Plasma Membrane, 3.Intra Cellular			ENSG00000184304	ASSOCIATED_GENE	PRKD1		PRKD1		5587			ASSOCIATED_GENE	FALSE	5587		[F8WBA3, Q15139]	5587
644								3.Intra Cellular	3.Intra Cellular			ENSG00000168078	ASSOCIATED_GENE	PBK		PBK		55872			ASSOCIATED_GENE	FALSE	55872		[Q96KB5, V9HWH0]	55872
645								2.Plasma Membrane	2.Plasma Membrane, 3.Intra Cellular			ENSG00000065675	ASSOCIATED_GENE	PRKCQ		PRKCQ		5588			ASSOCIATED_GENE	FALSE	5588		[Q04759]	5588
646								2.Plasma Membrane	2.Plasma Membrane, 3.Intra Cellular, 5.Nucleus			ENSG00000005483	ASSOCIATED_GENE	KMT2E		KMT2E		55904			ASSOCIATED_GENE	FALSE	55904		[Q8IZD2]	55904
647								2.Plasma Membrane	2.Plasma Membrane			ENSG00000196581	ASSOCIATED_GENE	AJAP1		AJAP1		55966			ASSOCIATED_GENE	FALSE	55966		[Q9UKB5]	55966
648								3.Intra Cellular	3.Intra Cellular			ENSG00000163380	ASSOCIATED_GENE	LMOD3		LMOD3		56203			ASSOCIATED_GENE	FALSE	56203		[Q0VAK6]	56203
649								2.Plasma Membrane	2.Plasma Membrane			ENSG00000109943	ASSOCIATED_GENE	CRTAM		CRTAM		56253			ASSOCIATED_GENE	FALSE	56253		[O95727]	56253
650								1.Extracellular	1.Extracellular, 3.Intra Cellular			ENSG00000135406	ASSOCIATED_GENE	PRPH		PRPH		5630			ASSOCIATED_GENE	FALSE	5630		[B3KWQ6, P41219]	5630
651								3.Intra Cellular	3.Intra Cellular, 5.Nucleus			ENSG00000184708	ASSOCIATED_GENE	EIF4ENIF1		EIF4ENIF1		56478			ASSOCIATED_GENE	FALSE	56478		[A0A024R1K0, Q9NRA8]	56478
652								2.Plasma Membrane	2.Plasma Membrane, 3.Intra Cellular			ENSG00000059915	ASSOCIATED_GENE	PSD		PSD		5662			ASSOCIATED_GENE	FALSE	5662		[A5PKW4, Q86YI3]	5662
653								2.Plasma Membrane	2.Plasma Membrane			ENSG00000152315	ASSOCIATED_GENE	KCNK13		KCNK13		56659			ASSOCIATED_GENE	FALSE	56659		[Q9HB14]	56659
654								3.Intra Cellular	3.Intra Cellular			ENSG00000105939	ASSOCIATED_GENE	ZC3HAV1		ZC3HAV1		56829			ASSOCIATED_GENE	FALSE	56829		[C9J6P4, Q7Z2W4]	56829
655								1.Extracellular	1.Extracellular, 3.Intra Cellular			ENSG00000136731	ASSOCIATED_GENE	UGGT1		UGGT1		56886			ASSOCIATED_GENE	FALSE	56886		[Q9NYU2]	56886
656								1.Extracellular	1.Extracellular, 3.Intra Cellular, 5.Nucleus			ENSG00000008018	ASSOCIATED_GENE	PSMB1		PSMB1		5689			ASSOCIATED_GENE	FALSE	5689		[A0A140VK45, P20618]	5689
657								2.Plasma Membrane	2.Plasma Membrane, 3.Intra Cellular, 5.Nucleus			ENSG00000160803	ASSOCIATED_GENE	UBQLN4		UBQLN4		56893			ASSOCIATED_GENE	FALSE	56893		[B4DZF6, Q59F94, Q9NRR5]	56893
658								1.Extracellular	1.Extracellular, 3.Intra Cellular			ENSG00000177706	ASSOCIATED_GENE	FAM20C		FAM20C		56975			ASSOCIATED_GENE	FALSE	56975		[Q8IXL6]	56975
659								1.Extracellular	1.Extracellular, 3.Intra Cellular			ENSG00000163638	ASSOCIATED_GENE	ADAMTS9		ADAMTS9		56999			ASSOCIATED_GENE	FALSE	56999		[Q9P2N4]	56999
660								2.Plasma Membrane	2.Plasma Membrane, 3.Intra Cellular			ENSG00000103544	ASSOCIATED_GENE	C16orf62		C16orf62		57020			ASSOCIATED_GENE	FALSE	57020		[B3KT69, E7EWW0, F5H7K1, Q7Z3J2]	57020
661								2.Plasma Membrane	2.Plasma Membrane, 3.Intra Cellular			ENSG00000047932	ASSOCIATED_GENE	GOPC		GOPC		57120			ASSOCIATED_GENE	FALSE	57120		[Q9HD26]	57120
662								3.Intra Cellular	3.Intra Cellular, 4.Nuclear Membrane, 5.Nucleus			ENSG00000111581	ASSOCIATED_GENE	NUP107		NUP107		57122			ASSOCIATED_GENE	FALSE	57122		[P57740]	57122
663								1.Extracellular	1.Extracellular, 2.Plasma Membrane, 3.Intra Cellular			ENSG00000117643	ASSOCIATED_GENE	MAN1C1		MAN1C1		57134			ASSOCIATED_GENE	FALSE	57134		[Q59G34, Q9NR34]	57134
664								1.Extracellular	1.Extracellular, 2.Plasma Membrane, 3.Intra Cellular, 5.Nucleus			ENSG00000115310	ASSOCIATED_GENE	RTN4		RTN4		57142			ASSOCIATED_GENE	FALSE	57142		[Q9NQC3]	57142
665								1.Extracellular	1.Extracellular, 2.Plasma Membrane, 3.Intra Cellular			ENSG00000172725	ASSOCIATED_GENE	CORO1B		CORO1B		57175			ASSOCIATED_GENE	FALSE	57175		[A0A024R5K1, Q9BR76]	57175
666								3.Intra Cellular	3.Intra Cellular			ENSG00000198105	ASSOCIATED_GENE	ZNF248		ZNF248		57209			ASSOCIATED_GENE	FALSE	57209		[A0A087WTK3, A2RUI7, Q8NDW4, S4R340]	57209
667								0.Annotation definition not found in 'Homo Sapiens.properties' file	0.Annotation definition not found in 'Homo Sapiens.properties' file			ENSG00000135540	ASSOCIATED_GENE	NHSL1		NHSL1		57224			ASSOCIATED_GENE	FALSE	57224		[Q5SYE7]	57224
668								2.Plasma Membrane	2.Plasma Membrane			ENSG00000168229	ASSOCIATED_GENE	PTGDR		PTGDR		5729			ASSOCIATED_GENE	FALSE	5729		[Q13258]	5729
669								2.Plasma Membrane	2.Plasma Membrane, 3.Intra Cellular			ENSG00000160013	ASSOCIATED_GENE	PTGIR		PTGIR		5739			ASSOCIATED_GENE	FALSE	5739		[P43119]	5739
670								1.Extracellular	1.Extracellular, 2.Plasma Membrane, 3.Intra Cellular			ENSG00000124212	ASSOCIATED_GENE	PTGIS		PTGIS		5740			ASSOCIATED_GENE	FALSE	5740		[Q16647]	5740
671								1.Extracellular	1.Extracellular, 2.Plasma Membrane, 3.Intra Cellular			ENSG00000095303	ASSOCIATED_GENE	PTGS1		PTGS1		5742			ASSOCIATED_GENE	FALSE	5742		[A0A087X296, P23219]	5742
672								2.Plasma Membrane	2.Plasma Membrane, 3.Intra Cellular			ENSG00000073756	ASSOCIATED_GENE	PTGS2		PTGS2		5743			ASSOCIATED_GENE	FALSE	5743		[P35354]	5743
673								0.Annotation definition not found in 'Homo Sapiens.properties' file	0.Annotation definition not found in 'Homo Sapiens.properties' file			ENSG00000204851	ASSOCIATED_GENE	PNMA8B		PNMA8B		57469			ASSOCIATED_GENE	FALSE	57469		[Q9ULN7]	57469
674								2.Plasma Membrane	2.Plasma Membrane, 3.Intra Cellular			ENSG00000169398	ASSOCIATED_GENE	PTK2		PTK2		5747			ASSOCIATED_GENE	FALSE	5747		[Q05397, Q59GM6, Q59GN8, Q658W2]	5747
675								2.Plasma Membrane	2.Plasma Membrane			ENSG00000023171	ASSOCIATED_GENE	GRAMD1B		GRAMD1B		57476			ASSOCIATED_GENE	FALSE	57476		[A0A024R3M2, A0A1B0GUD6, B7Z4N9, Q3KR37]	57476
676								2.Plasma Membrane	2.Plasma Membrane, 3.Intra Cellular, 5.Nucleus			ENSG00000049618	ASSOCIATED_GENE	ARID1B		ARID1B		57492			ASSOCIATED_GENE	FALSE	57492		[A0A1B0GVK1, Q8NFD5]	57492
677								2.Plasma Membrane	2.Plasma Membrane			ENSG00000183775	ASSOCIATED_GENE	KCTD16		KCTD16		57528			ASSOCIATED_GENE	FALSE	57528		[A8K8W2, Q68DU8]	57528
678								2.Plasma Membrane	2.Plasma Membrane, 3.Intra Cellular, 5.Nucleus			ENSG00000101213	ASSOCIATED_GENE	PTK6		PTK6		5753			ASSOCIATED_GENE	FALSE	5753		[Q13882]	5753
679								0.Annotation definition not found in 'Homo Sapiens.properties' file	0.Annotation definition not found in 'Homo Sapiens.properties' file			ENSG00000118369	ASSOCIATED_GENE	USP35		USP35		57558			ASSOCIATED_GENE	FALSE	57558		[Q9P2H5]	57558
680								3.Intra Cellular	3.Intra Cellular			ENSG00000130158	ASSOCIATED_GENE	DOCK6		DOCK6		57572			ASSOCIATED_GENE	FALSE	57572		[B7Z9U8, Q96HP0]	57572
681								2.Plasma Membrane	2.Plasma Membrane			ENSG00000138650	ASSOCIATED_GENE	PCDH10		PCDH10		57575			ASSOCIATED_GENE	FALSE	57575		[Q9NSR3, Q9P2E7, X5D999]	57575
682								3.Intra Cellular	3.Intra Cellular			ENSG00000007545	ASSOCIATED_GENE	CRAMP1		CRAMP1		57585			ASSOCIATED_GENE	FALSE	57585		[A7MD53, B2RNX8, Q96RY5]	57585
683								3.Intra Cellular	3.Intra Cellular			ENSG00000085449	ASSOCIATED_GENE	WDFY1		WDFY1		57590			ASSOCIATED_GENE	FALSE	57590		[A0A024R488, Q8IWB7, Q9H8N9]	57590
684								3.Intra Cellular	3.Intra Cellular			ENSG00000183092	ASSOCIATED_GENE	BEGAIN		BEGAIN		57596			ASSOCIATED_GENE	FALSE	57596		[Q9BUH8]	57596
685								2.Plasma Membrane	2.Plasma Membrane			ENSG00000084444	ASSOCIATED_GENE	FAM234B		FAM234B		57613			ASSOCIATED_GENE	FALSE	57613		[A2RU67]	57613
686								3.Intra Cellular	3.Intra Cellular, 5.Nucleus			ENSG00000163945	ASSOCIATED_GENE	UVSSA		UVSSA		57654			ASSOCIATED_GENE	FALSE	57654		[Q2YD98, Q69YU2]	57654
687								3.Intra Cellular	3.Intra Cellular, 5.Nucleus			ENSG00000012822	ASSOCIATED_GENE	CALCOCO1		CALCOCO1		57658			ASSOCIATED_GENE	FALSE	57658		[A0A024RAZ1, Q9P1Z2]	57658
688								2.Plasma Membrane	2.Plasma Membrane, 3.Intra Cellular			ENSG00000119927	ASSOCIATED_GENE	GPAM		GPAM		57678			ASSOCIATED_GENE	FALSE	57678		[Q86T70, Q8N1G6, Q9HCL2]	57678
689								3.Intra Cellular	3.Intra Cellular			ENSG00000171448	ASSOCIATED_GENE	ZBTB26		ZBTB26		57684			ASSOCIATED_GENE	FALSE	57684		[Q9HCK0]	57684
690								3.Intra Cellular	3.Intra Cellular			ENSG00000078687	ASSOCIATED_GENE	TNRC6C		TNRC6C		57690			ASSOCIATED_GENE	FALSE	57690		[Q9HCJ0]	57690
691								1.Extracellular	1.Extracellular, 2.Plasma Membrane, 3.Intra Cellular, 5.Nucleus			ENSG00000160460	ASSOCIATED_GENE	SPTBN4		SPTBN4		57731			ASSOCIATED_GENE	FALSE	57731		[Q9H254]	57731
692								1.Extracellular	1.Extracellular, 2.Plasma Membrane, 3.Intra Cellular, 5.Nucleus			ENSG00000111679	ASSOCIATED_GENE	PTPN6		PTPN6		5777			ASSOCIATED_GENE	FALSE	5777		[P29350, Q53XS4]	5777
693								3.Intra Cellular	3.Intra Cellular, 5.Nucleus			ENSG00000179295	ASSOCIATED_GENE	PTPN11		PTPN11		5781			ASSOCIATED_GENE	FALSE	5781		[Q06124]	5781
694								2.Plasma Membrane	2.Plasma Membrane, 3.Intra Cellular			ENSG00000173482	ASSOCIATED_GENE	PTPRM		PTPRM		5797			ASSOCIATED_GENE	FALSE	5797		[P28827]	5797
695								3.Intra Cellular	3.Intra Cellular, 5.Nucleus			ENSG00000138376	ASSOCIATED_GENE	BARD1		BARD1		580			ASSOCIATED_GENE	FALSE	580		[A0A087WZ19, A0A087X2H0, A0AVN2, F6MDI0, F6MDI1, F6MDI2, Q99728]	580
696								3.Intra Cellular	3.Intra Cellular			ENSG00000139197	ASSOCIATED_GENE	PEX5		PEX5		5830			ASSOCIATED_GENE	FALSE	5830		[A0A0S2Z480, A0A0S2Z4F3, A0A0S2Z4H1, B4DR50, B4E0T2, P50542]	5830
697								2.Plasma Membrane	2.Plasma Membrane, 3.Intra Cellular			ENSG00000185813	ASSOCIATED_GENE	PCYT2		PCYT2		5833			ASSOCIATED_GENE	FALSE	5833		[B3KSC8, B7Z4W6, I3L1R7, Q99447]	5833
698								1.Extracellular	1.Extracellular, 3.Intra Cellular			ENSG00000100504	ASSOCIATED_GENE	PYGL		PYGL		5836			ASSOCIATED_GENE	FALSE	5836		[P06737]	5836
699								2.Plasma Membrane	2.Plasma Membrane, 3.Intra Cellular			ENSG00000116574	ASSOCIATED_GENE	RHOU		RHOU		58480			ASSOCIATED_GENE	FALSE	58480		[A0A024R3Q7, Q7L0Q8]	58480
700								3.Intra Cellular	3.Intra Cellular			ENSG00000128805	ASSOCIATED_GENE	ARHGAP22		ARHGAP22		58504			ASSOCIATED_GENE	FALSE	58504		[Q7Z5H3]	58504
701								2.Plasma Membrane	2.Plasma Membrane, 3.Intra Cellular			ENSG00000127527	ASSOCIATED_GENE	EPS15L1		EPS15L1		58513			ASSOCIATED_GENE	FALSE	58513		[A0A024R7G6, Q9UBC2]	58513
702								0.Annotation definition not found in 'Homo Sapiens.properties' file	0.Annotation definition not found in 'Homo Sapiens.properties' file			ENSG00000146386	ASSOCIATED_GENE	ABRACL		ABRACL		58527			ASSOCIATED_GENE	FALSE	58527		[Q9P1F3]	58527
703								3.Intra Cellular	3.Intra Cellular			ENSG00000172053	ASSOCIATED_GENE	QARS		QARS		5859			ASSOCIATED_GENE	FALSE	5859		[B7Z840, P47897]	5859
704								1.Extracellular	1.Extracellular, 2.Plasma Membrane, 3.Intra Cellular			ENSG00000144566	ASSOCIATED_GENE	RAB5A		RAB5A		5868			ASSOCIATED_GENE	FALSE	5868		[A0A024R2K1, P20339]	5868
705								3.Intra Cellular	3.Intra Cellular, 5.Nucleus			ENSG00000248098	ASSOCIATED_GENE	BCKDHA		BCKDHA		593			ASSOCIATED_GENE	FALSE	593		[A0A024R0K3, P12694, Q59EI3]	593
706								1.Extracellular	1.Extracellular, 2.Plasma Membrane, 3.Intra Cellular			ENSG00000137710	ASSOCIATED_GENE	RDX		RDX		5962			ASSOCIATED_GENE	FALSE	5962		[B0YJ88, P35241, Q6PKD3]	5962
707								1.Extracellular	1.Extracellular, 2.Plasma Membrane, 3.Intra Cellular			ENSG00000143839	ASSOCIATED_GENE	REN		REN		5972			ASSOCIATED_GENE	FALSE	5972		[P00797]	5972
708								3.Intra Cellular	3.Intra Cellular			ENSG00000143390	ASSOCIATED_GENE	RFX5		RFX5		5993			ASSOCIATED_GENE	FALSE	5993		[P48382]	5993
709								2.Plasma Membrane	2.Plasma Membrane, 3.Intra Cellular			ENSG00000137500	ASSOCIATED_GENE	CCDC90B		CCDC90B		60492			ASSOCIATED_GENE	FALSE	60492		[Q9GZT6]	60492
710								3.Intra Cellular	3.Intra Cellular, 5.Nucleus			ENSG00000006744	ASSOCIATED_GENE	ELAC2		ELAC2		60528			ASSOCIATED_GENE	FALSE	60528		[A0A0S2Z5M8, Q9BQ52]	60528
711								2.Plasma Membrane	2.Plasma Membrane, 3.Intra Cellular			ENSG00000169855	ASSOCIATED_GENE	ROBO1		ROBO1		6091			ASSOCIATED_GENE	FALSE	6091		[Q1RMC8, Q9Y6N7]	6091
712								3.Intra Cellular	3.Intra Cellular, 5.Nucleus			ENSG00000198963	ASSOCIATED_GENE	RORB		RORB		6096			ASSOCIATED_GENE	FALSE	6096		[Q58EY0]	6096
713								1.Extracellular	1.Extracellular, 2.Plasma Membrane, 3.Intra Cellular, 5.Nucleus			ENSG00000102218	ASSOCIATED_GENE	RP2		RP2		6102			ASSOCIATED_GENE	FALSE	6102		[A0A1B2JLU2, O75695]	6102
714								3.Intra Cellular	3.Intra Cellular			ENSG00000089009	ASSOCIATED_GENE	RPL6		RPL6		6128			ASSOCIATED_GENE	FALSE	6128		[A0A024RBK3, Q02878, Q8TBK5]	6128
715								1.Extracellular	1.Extracellular, 3.Intra Cellular, 5.Nucleus			ENSG00000147604	ASSOCIATED_GENE	RPL7		RPL7		6129			ASSOCIATED_GENE	FALSE	6129		[A8MUD9, P18124]	6129
716								3.Intra Cellular	3.Intra Cellular, 5.Nucleus			ENSG00000177189	ASSOCIATED_GENE	RPS6KA3		RPS6KA3		6197			ASSOCIATED_GENE	FALSE	6197		[B4DG22, B7ZB17, P51812]	6197
717								3.Intra Cellular	3.Intra Cellular			ENSG00000171848	ASSOCIATED_GENE	RRM2		RRM2		6241			ASSOCIATED_GENE	FALSE	6241		[P31350]	6241
718								1.Extracellular	1.Extracellular, 2.Plasma Membrane			ENSG00000102104	ASSOCIATED_GENE	RS1		RS1		6247			ASSOCIATED_GENE	FALSE	6247		[O15537]	6247
719								1.Extracellular	1.Extracellular, 2.Plasma Membrane, 3.Intra Cellular			ENSG00000196218	ASSOCIATED_GENE	RYR1		RYR1		6261			ASSOCIATED_GENE	FALSE	6261		[P21817]	6261
720								3.Intra Cellular	3.Intra Cellular, 5.Nucleus			ENSG00000124788	ASSOCIATED_GENE	ATXN1		ATXN1		6310			ASSOCIATED_GENE	FALSE	6310		[P54253, Q96FF1]	6310
721								3.Intra Cellular	3.Intra Cellular			ENSG00000204842	ASSOCIATED_GENE	ATXN2		ATXN2		6311			ASSOCIATED_GENE	FALSE	6311		[F8VQP2, Q2M2R5, Q99700]	6311
722								1.Extracellular	1.Extracellular			ENSG00000115009	ASSOCIATED_GENE	CCL20		CCL20		6364			ASSOCIATED_GENE	FALSE	6364		[P78556]	6364
723								3.Intra Cellular	3.Intra Cellular			ENSG00000176399	ASSOCIATED_GENE	DMRTA1		DMRTA1		63951			ASSOCIATED_GENE	FALSE	63951		[Q5VZB9]	63951
724								3.Intra Cellular	3.Intra Cellular			ENSG00000137177	ASSOCIATED_GENE	KIF13A		KIF13A		63971			ASSOCIATED_GENE	FALSE	63971		[Q9H1H9]	63971
725								3.Intra Cellular	3.Intra Cellular, 5.Nucleus			ENSG00000141956	ASSOCIATED_GENE	PRDM15		PRDM15		63977			ASSOCIATED_GENE	FALSE	63977		[E7ER26, P57071]	63977
726								1.Extracellular	1.Extracellular, 3.Intra Cellular, 5.Nucleus			ENSG00000132436	ASSOCIATED_GENE	FIGNL1		FIGNL1		63979			ASSOCIATED_GENE	FALSE	63979		[B3KNH6, Q6PIW4]	63979
727								2.Plasma Membrane	2.Plasma Membrane, 3.Intra Cellular			ENSG00000071537	ASSOCIATED_GENE	SEL1L		SEL1L		6400			ASSOCIATED_GENE	FALSE	6400		[Q3ZCU6, Q9UBV2]	6400
728								1.Extracellular	1.Extracellular			ENSG00000177383	ASSOCIATED_GENE	MAGEF1		MAGEF1		64110			ASSOCIATED_GENE	FALSE	64110		[Q9HAY2]	64110
729								2.Plasma Membrane	2.Plasma Membrane, 3.Intra Cellular, 5.Nucleus			ENSG00000167207	ASSOCIATED_GENE	NOD2		NOD2		64127			ASSOCIATED_GENE	FALSE	64127		[Q9HC29]	64127
730								3.Intra Cellular	3.Intra Cellular			ENSG00000128694	ASSOCIATED_GENE	OSGEPL1		OSGEPL1		64172			ASSOCIATED_GENE	FALSE	64172		[Q9H4B0]	64172
731								2.Plasma Membrane	2.Plasma Membrane			ENSG00000154134	ASSOCIATED_GENE	ROBO3		ROBO3		64221			ASSOCIATED_GENE	FALSE	64221		[F5GWJ5, Q96MS0]	64221
732								3.Intra Cellular	3.Intra Cellular			ENSG00000255009	ASSOCIATED_GENE	UBTFL1		UBTFL1		642623			ASSOCIATED_GENE	FALSE	642623		[P0CB47]	642623
733								2.Plasma Membrane	2.Plasma Membrane			ENSG00000188167	ASSOCIATED_GENE	TMPPE		TMPPE		643853			ASSOCIATED_GENE	FALSE	643853		[Q6ZT21]	643853
734								3.Intra Cellular	3.Intra Cellular, 5.Nucleus			ENSG00000087338	ASSOCIATED_GENE	GMCL1		GMCL1		64395			ASSOCIATED_GENE	FALSE	64395		[Q53SE7, Q96IK5]	64395
735								3.Intra Cellular	3.Intra Cellular			ENSG00000183655	ASSOCIATED_GENE	KLHL25		KLHL25		64410			ASSOCIATED_GENE	FALSE	64410		[Q9H0H3]	64410
736								3.Intra Cellular	3.Intra Cellular, 5.Nucleus			ENSG00000111707	ASSOCIATED_GENE	SUDS3		SUDS3		64426			ASSOCIATED_GENE	FALSE	64426		[Q9H7L9]	64426
737								3.Intra Cellular	3.Intra Cellular			ENSG00000103245	ASSOCIATED_GENE	NARFL		NARFL		64428			ASSOCIATED_GENE	FALSE	64428		[Q9H6Q4]	64428
738								2.Plasma Membrane	2.Plasma Membrane, 3.Intra Cellular, 5.Nucleus			ENSG00000118515	ASSOCIATED_GENE	SGK1		SGK1		6446			ASSOCIATED_GENE	FALSE	6446		[B7Z325, E9PR89, O00141]	6446
739								2.Plasma Membrane	2.Plasma Membrane			ENSG00000181619	ASSOCIATED_GENE	GPR135		GPR135		64582			ASSOCIATED_GENE	FALSE	64582		[Q8IZ08]	64582
740								2.Plasma Membrane	2.Plasma Membrane, 3.Intra Cellular			ENSG00000106330	ASSOCIATED_GENE	MOSPD3		MOSPD3		64598			ASSOCIATED_GENE	FALSE	64598		[O75425]	64598
741								2.Plasma Membrane	2.Plasma Membrane, 3.Intra Cellular			ENSG00000160183	ASSOCIATED_GENE	TMPRSS3		TMPRSS3		64699			ASSOCIATED_GENE	FALSE	64699		[P57727]	64699
742								3.Intra Cellular	3.Intra Cellular, 5.Nucleus			ENSG00000069275	ASSOCIATED_GENE	NUCKS1		NUCKS1		64710			ASSOCIATED_GENE	FALSE	64710		[Q9H1E3]	64710
743								3.Intra Cellular	3.Intra Cellular			ENSG00000123472	ASSOCIATED_GENE	ATPAF1		ATPAF1		64756			ASSOCIATED_GENE	FALSE	64756		[A8MRA7, I3L448, Q5TC12]	64756
744								1.Extracellular	1.Extracellular, 3.Intra Cellular			ENSG00000121749	ASSOCIATED_GENE	TBC1D15		TBC1D15		64786			ASSOCIATED_GENE	FALSE	64786		[A8K8E1, Q8TC07]	64786
745								3.Intra Cellular	3.Intra Cellular, 5.Nucleus			ENSG00000149016	ASSOCIATED_GENE	TUT1		TUT1		64852			ASSOCIATED_GENE	FALSE	64852		[F5H0R1, Q9H6E5]	64852
746								2.Plasma Membrane	2.Plasma Membrane			ENSG00000197991	ASSOCIATED_GENE	PCDH20		PCDH20		64881			ASSOCIATED_GENE	FALSE	64881		[B3KSZ7, Q8N6Y1]	64881
747								3.Intra Cellular	3.Intra Cellular			ENSG00000204316	ASSOCIATED_GENE	MRPL38		MRPL38		64978			ASSOCIATED_GENE	FALSE	64978		[Q96DV4]	64978
748								3.Intra Cellular	3.Intra Cellular			ENSG00000204351	ASSOCIATED_GENE	SKIV2L		SKIV2L		6499			ASSOCIATED_GENE	FALSE	6499		[A0A1U9X8J1, Q15477]	6499
749								3.Intra Cellular	3.Intra Cellular			ENSG00000196632	ASSOCIATED_GENE	WNK3		WNK3		65267			ASSOCIATED_GENE	FALSE	65267		[Q9BYP7]	65267
750								3.Intra Cellular	3.Intra Cellular			ENSG00000215474	ASSOCIATED_GENE	SKOR2		SKOR2		652991			ASSOCIATED_GENE	FALSE	652991		[A0A087X0E6, Q2VWA4]	652991
751								2.Plasma Membrane	2.Plasma Membrane			ENSG00000147100	ASSOCIATED_GENE	SLC16A2		SLC16A2		6567			ASSOCIATED_GENE	FALSE	6567		[P36021]	6567
752								1.Extracellular	1.Extracellular, 2.Plasma Membrane, 3.Intra Cellular, 5.Nucleus			ENSG00000204217	ASSOCIATED_GENE	BMPR2		BMPR2		659			ASSOCIATED_GENE	FALSE	659		[Q13873]	659
753								3.Intra Cellular	3.Intra Cellular			ENSG00000116095	ASSOCIATED_GENE	PLEKHA3		PLEKHA3		65977			ASSOCIATED_GENE	FALSE	65977		[Q9HB20]	65977
754								0.Annotation definition not found in 'Homo Sapiens.properties' file	0.Annotation definition not found in 'Homo Sapiens.properties' file			ENSG00000127399	ASSOCIATED_GENE	LRRC61		LRRC61		65999			ASSOCIATED_GENE	FALSE	65999		[A0A090N7W5, Q9BV99]	65999
755								2.Plasma Membrane	2.Plasma Membrane, 3.Intra Cellular			ENSG00000133460	ASSOCIATED_GENE	SLC2A11		SLC2A11		66035			ASSOCIATED_GENE	FALSE	66035		[A0A087X018, B7Z6F0, Q6PJ99, Q9BYW1]	66035
756								3.Intra Cellular	3.Intra Cellular, 5.Nucleus			ENSG00000124216	ASSOCIATED_GENE	SNAI1		SNAI1		6615			ASSOCIATED_GENE	FALSE	6615		[O95863]	6615
757								3.Intra Cellular	3.Intra Cellular, 5.Nucleus			ENSG00000131876	ASSOCIATED_GENE	SNRPA1		SNRPA1		6627			ASSOCIATED_GENE	FALSE	6627		[P09661]	6627
758								1.Extracellular	1.Extracellular, 2.Plasma Membrane, 3.Intra Cellular			ENSG00000057252	ASSOCIATED_GENE	SOAT1		SOAT1		6646			ASSOCIATED_GENE	FALSE	6646		[P35610]	6646
759								3.Intra Cellular	3.Intra Cellular			ENSG00000134532	ASSOCIATED_GENE	SOX5		SOX5		6660			ASSOCIATED_GENE	FALSE	6660		[A0A024RB06, F5H0I3, P35711, T2CYZ2, T2CZM2]	6660
760								1.Extracellular	1.Extracellular, 2.Plasma Membrane, 3.Intra Cellular			ENSG00000106304	ASSOCIATED_GENE	SPAM1		SPAM1		6677			ASSOCIATED_GENE	FALSE	6677		[P38567, Q5D1J4]	6677
761								1.Extracellular	1.Extracellular, 3.Intra Cellular			ENSG00000137274	ASSOCIATED_GENE	BPHL		BPHL		670			ASSOCIATED_GENE	FALSE	670		[A0A024QZY0, Q49AI2, Q86W56, Q86WA6]	670
762								1.Extracellular	1.Extracellular, 2.Plasma Membrane, 3.Intra Cellular			ENSG00000182934	ASSOCIATED_GENE	SRPRA		SRPRA		6734			ASSOCIATED_GENE	FALSE	6734		[P08240]	6734
763								2.Plasma Membrane	2.Plasma Membrane, 3.Intra Cellular			ENSG00000138434	ASSOCIATED_GENE	SSFA2		SSFA2		6744			ASSOCIATED_GENE	FALSE	6744		[E7EUL7, E9PHV5, P28290]	6744
764								1.Extracellular	1.Extracellular, 3.Intra Cellular, 5.Nucleus			ENSG00000101109	ASSOCIATED_GENE	STK4		STK4		6789			ASSOCIATED_GENE	FALSE	6789		[Q13043]	6789
765								1.Extracellular	1.Extracellular, 2.Plasma Membrane, 3.Intra Cellular			ENSG00000072786	ASSOCIATED_GENE	STK10		STK10		6793			ASSOCIATED_GENE	FALSE	6793		[O94804]	6793
766								2.Plasma Membrane	2.Plasma Membrane, 3.Intra Cellular			ENSG00000162236	ASSOCIATED_GENE	STX5		STX5		6811			ASSOCIATED_GENE	FALSE	6811		[B4DKR0, Q13190]	6811
767								2.Plasma Membrane	2.Plasma Membrane, 3.Intra Cellular			ENSG00000006071	ASSOCIATED_GENE	ABCC8		ABCC8		6833			ASSOCIATED_GENE	FALSE	6833		[Q09428]	6833
768								2.Plasma Membrane	2.Plasma Membrane, 3.Intra Cellular			ENSG00000067715	ASSOCIATED_GENE	SYT1		SYT1		6857			ASSOCIATED_GENE	FALSE	6857		[A0A024RBE9, J3KQA0, P21579]	6857
769								1.Extracellular	1.Extracellular, 3.Intra Cellular			ENSG00000113407	ASSOCIATED_GENE	TARS		TARS		6897			ASSOCIATED_GENE	FALSE	6897		[P26639]	6897
770								2.Plasma Membrane	2.Plasma Membrane			ENSG00000184144	ASSOCIATED_GENE	CNTN2		CNTN2		6900			ASSOCIATED_GENE	FALSE	6900		[A0A024R9B4, A1L3A3, Q02246]	6900
771						Transcription Factor Complex	Transcription Factor Complex	3.Intra Cellular	3.Intra Cellular, 5.Nucleus			ENSG00000125878	ASSOCIATED_GENE	TCF15		TCF15		6939			ASSOCIATED_GENE	FALSE	6939		[A4LBB6, Q12870, Q6NVX3]	6939
772								3.Intra Cellular	3.Intra Cellular, 5.Nucleus			ENSG00000100207	ASSOCIATED_GENE	TCF20		TCF20		6942			ASSOCIATED_GENE	FALSE	6942		[Q9UGU0, W5ZR30]	6942
773								1.Extracellular	1.Extracellular, 3.Intra Cellular			ENSG00000134827	ASSOCIATED_GENE	TCN1		TCN1		6947			ASSOCIATED_GENE	FALSE	6947		[P20061]	6947
774								3.Intra Cellular	3.Intra Cellular			ENSG00000107140	ASSOCIATED_GENE	TESK1		TESK1		7016			ASSOCIATED_GENE	FALSE	7016		[Q15569, Q8NFJ4]	7016
775								3.Intra Cellular	3.Intra Cellular, 5.Nucleus			ENSG00000068323	ASSOCIATED_GENE	TFE3		TFE3		7030			ASSOCIATED_GENE	FALSE	7030		[A0A024QZ23, B4DIA5, P19532]	7030
776								1.Extracellular	1.Extracellular, 2.Plasma Membrane, 3.Intra Cellular			ENSG00000072274	ASSOCIATED_GENE	TFRC		TFRC		7037			ASSOCIATED_GENE	FALSE	7037		[A8K6Q8, B7Z2I6, G3V0E5, P02786, Q7Z3E0]	7037
777								1.Extracellular	1.Extracellular, 3.Intra Cellular			ENSG00000092969	ASSOCIATED_GENE	TGFB2		TGFB2		7042			ASSOCIATED_GENE	FALSE	7042		[P61812, Q59EG9]	7042
778								1.Extracellular	1.Extracellular, 2.Plasma Membrane, 3.Intra Cellular			ENSG00000137801	ASSOCIATED_GENE	THBS1		THBS1		7057			ASSOCIATED_GENE	FALSE	7057		[P07996]	7057
779								2.Plasma Membrane	2.Plasma Membrane, 3.Intra Cellular			ENSG00000156299	ASSOCIATED_GENE	TIAM1		TIAM1		7074			ASSOCIATED_GENE	FALSE	7074		[Q13009]	7074
780								3.Intra Cellular	3.Intra Cellular			ENSG00000167900	ASSOCIATED_GENE	TK1		TK1		7083			ASSOCIATED_GENE	FALSE	7083		[K7ES52, P04183]	7083
781								3.Intra Cellular	3.Intra Cellular			ENSG00000144747	ASSOCIATED_GENE	TMF1		TMF1		7110			ASSOCIATED_GENE	FALSE	7110		[A0A024R370, P82094, Q6PII6]	7110
782								3.Intra Cellular	3.Intra Cellular, 5.Nucleus			ENSG00000077097	ASSOCIATED_GENE	TOP2B		TOP2B		7155			ASSOCIATED_GENE	FALSE	7155		[Q02880, Q59H80]	7155
783								2.Plasma Membrane	2.Plasma Membrane, 3.Intra Cellular			ENSG00000133107	ASSOCIATED_GENE	TRPC4		TRPC4		7223			ASSOCIATED_GENE	FALSE	7223		[Q3KR50, Q9UBN4]	7223
784								3.Intra Cellular	3.Intra Cellular, 5.Nucleus			ENSG00000189241	ASSOCIATED_GENE	TSPYL1		TSPYL1		7259			ASSOCIATED_GENE	FALSE	7259		[Q9H0U9]	7259
785								3.Intra Cellular	3.Intra Cellular			ENSG00000112742	ASSOCIATED_GENE	TTK		TTK		7272			ASSOCIATED_GENE	FALSE	7272		[P33981]	7272
786								1.Extracellular	1.Extracellular			ENSG00000053328	ASSOCIATED_GENE	METTL24		METTL24		728464			ASSOCIATED_GENE	FALSE	728464		[Q5JXM2]	728464
787								0.Annotation definition not found in 'Homo Sapiens.properties' file	0.Annotation definition not found in 'Homo Sapiens.properties' file			ENSG00000214842	ASSOCIATED_GENE	RAD51AP2		RAD51AP2		729475			ASSOCIATED_GENE	FALSE	729475		[Q09MP3]	729475
788								3.Intra Cellular	3.Intra Cellular			ENSG00000196460	ASSOCIATED_GENE	RFX8		RFX8		731220			ASSOCIATED_GENE	FALSE	731220		[Q6ZV50]	731220
789								3.Intra Cellular	3.Intra Cellular, 5.Nucleus			ENSG00000103275	ASSOCIATED_GENE	UBE2I		UBE2I		7329			ASSOCIATED_GENE	FALSE	7329		[A8K503, B0QYN7, P63279]	7329
790								1.Extracellular	1.Extracellular, 2.Plasma Membrane			ENSG00000176919	ASSOCIATED_GENE	C8G		C8G		733			ASSOCIATED_GENE	FALSE	733		[P07360]	733
791								3.Intra Cellular	3.Intra Cellular			ENSG00000114062	ASSOCIATED_GENE	UBE3A		UBE3A		7337			ASSOCIATED_GENE	FALSE	7337		[Q05086, Q9BUI6, Q9H2G0]	7337
792								1.Extracellular	1.Extracellular, 2.Plasma Membrane, 3.Intra Cellular			ENSG00000113600	ASSOCIATED_GENE	C9		C9		735			ASSOCIATED_GENE	FALSE	735		[P02748]	735
793								1.Extracellular	1.Extracellular, 2.Plasma Membrane, 3.Intra Cellular			ENSG00000035403	ASSOCIATED_GENE	VCL		VCL		7414			ASSOCIATED_GENE	FALSE	7414		[A0A024QZN4, B3KXA2, P18206, V9HWK2]	7414
794								1.Extracellular	1.Extracellular, 2.Plasma Membrane, 3.Intra Cellular, 5.Nucleus			ENSG00000165280	ASSOCIATED_GENE	VCP		VCP		7415			ASSOCIATED_GENE	FALSE	7415		[P55072, Q96IF9, V9HW80]	7415
795								1.Extracellular	1.Extracellular, 3.Intra Cellular			ENSG00000015285	ASSOCIATED_GENE	WAS		WAS		7454			ASSOCIATED_GENE	FALSE	7454		[A0A024QYX8, P42768]	7454
796								1.Extracellular	1.Extracellular, 2.Plasma Membrane, 3.Intra Cellular			ENSG00000105989	ASSOCIATED_GENE	WNT2		WNT2		7472			ASSOCIATED_GENE	FALSE	7472		[P09544]	7472
797								1.Extracellular	1.Extracellular, 2.Plasma Membrane, 3.Intra Cellular			ENSG00000176105	ASSOCIATED_GENE	YES1		YES1		7525			ASSOCIATED_GENE	FALSE	7525		[P07947]	7525
798								3.Intra Cellular	3.Intra Cellular			ENSG00000128016	ASSOCIATED_GENE	ZFP36		ZFP36		7538			ASSOCIATED_GENE	FALSE	7538		[M0QY76, P26651]	7538
799								2.Plasma Membrane	2.Plasma Membrane, 3.Intra Cellular			ENSG00000162300	ASSOCIATED_GENE	ZFPL1		ZFPL1		7542			ASSOCIATED_GENE	FALSE	7542		[A0A024R576, O95159]	7542
800								3.Intra Cellular	3.Intra Cellular			ENSG00000166529	ASSOCIATED_GENE	ZSCAN21		ZSCAN21		7589			ASSOCIATED_GENE	FALSE	7589		[G3V0F4, Q9Y5A6]	7589
801								3.Intra Cellular	3.Intra Cellular			ENSG00000164879	ASSOCIATED_GENE	CA3		CA3		761			ASSOCIATED_GENE	FALSE	761		[P07451, V9HWA3]	761
802								1.Extracellular	1.Extracellular, 2.Plasma Membrane, 3.Intra Cellular			ENSG00000167434	ASSOCIATED_GENE	CA4		CA4		762			ASSOCIATED_GENE	FALSE	762		[P22748]	762
803								3.Intra Cellular	3.Intra Cellular			ENSG00000186376	ASSOCIATED_GENE	ZNF75D		ZNF75D		7626			ASSOCIATED_GENE	FALSE	7626		[P51815, Q86TD5]	7626
804								3.Intra Cellular	3.Intra Cellular			ENSG00000131849	ASSOCIATED_GENE	ZNF132		ZNF132		7691			ASSOCIATED_GENE	FALSE	7691		[B3KQ54, P52740]	7691
805								3.Intra Cellular	3.Intra Cellular			ENSG00000213762	ASSOCIATED_GENE	ZNF134		ZNF134		7693			ASSOCIATED_GENE	FALSE	7693		[P52741, Q5U5N5]	7693
806								3.Intra Cellular	3.Intra Cellular			ENSG00000115568	ASSOCIATED_GENE	ZNF142		ZNF142		7701			ASSOCIATED_GENE	FALSE	7701		[P52746]	7701
807								2.Plasma Membrane	2.Plasma Membrane, 3.Intra Cellular			ENSG00000128482	ASSOCIATED_GENE	RNF112		RNF112		7732			ASSOCIATED_GENE	FALSE	7732		[Q9ULX5]	7732
808								2.Plasma Membrane	2.Plasma Membrane			ENSG00000148408	ASSOCIATED_GENE	CACNA1B		CACNA1B		774			ASSOCIATED_GENE	FALSE	774		[B1AQK6, B1AQK7, F6RH32, Q00975]	774
809								3.Intra Cellular	3.Intra Cellular, 5.Nucleus			ENSG00000197062	ASSOCIATED_GENE	ZSCAN26		ZSCAN26		7741			ASSOCIATED_GENE	FALSE	7741		[A0A024RCN4, A0A087X2F1, B3KTR1, B4DMT1, B4DVH3, Q16670]	7741
810								3.Intra Cellular	3.Intra Cellular			ENSG00000010539	ASSOCIATED_GENE	ZNF200		ZNF200		7752			ASSOCIATED_GENE	FALSE	7752		[B3KP91, P98182]	7752
811								1.Extracellular	1.Extracellular, 2.Plasma Membrane, 3.Intra Cellular			ENSG00000103310	ASSOCIATED_GENE	ZP2		ZP2		7783			ASSOCIATED_GENE	FALSE	7783		[Q05996]	7783
812								1.Extracellular	1.Extracellular, 2.Plasma Membrane			ENSG00000188372	ASSOCIATED_GENE	ZP3		ZP3		7784			ASSOCIATED_GENE	FALSE	7784		[P21754]	7784
813								3.Intra Cellular	3.Intra Cellular			ENSG00000067208	ASSOCIATED_GENE	EVI5		EVI5		7813			ASSOCIATED_GENE	FALSE	7813		[O60447, Q59FE7]	7813
814								2.Plasma Membrane	2.Plasma Membrane, 3.Intra Cellular			ENSG00000204922	ASSOCIATED_GENE	UQCC3		UQCC3		790955			ASSOCIATED_GENE	FALSE	790955		[Q6UW78]	790955
815								3.Intra Cellular	3.Intra Cellular, 5.Nucleus			ENSG00000040633	ASSOCIATED_GENE	PHF23		PHF23		79142			ASSOCIATED_GENE	FALSE	79142		[Q9BUL5]	79142
816								3.Intra Cellular	3.Intra Cellular, 5.Nucleus			ENSG00000280789	ASSOCIATED_GENE	PAGR1		PAGR1		79447			ASSOCIATED_GENE	FALSE	79447		[Q9BTK6]	79447
817								3.Intra Cellular	3.Intra Cellular, 5.Nucleus			ENSG00000101882	ASSOCIATED_GENE	NKAP		NKAP		79576			ASSOCIATED_GENE	FALSE	79576		[Q8N5F7]	79576
818								3.Intra Cellular	3.Intra Cellular			ENSG00000177614	ASSOCIATED_GENE	PGBD5		PGBD5		79605			ASSOCIATED_GENE	FALSE	79605		[Q8N414]	79605
819								1.Extracellular	1.Extracellular, 2.Plasma Membrane			ENSG00000196159	ASSOCIATED_GENE	FAT4		FAT4		79633			ASSOCIATED_GENE	FALSE	79633		[B3KU84, Q6V0I7, X2G5I7, X2GA70]	79633
820								1.Extracellular	1.Extracellular, 2.Plasma Membrane, 3.Intra Cellular			ENSG00000197093	ASSOCIATED_GENE	GAL3ST4		GAL3ST4		79690			ASSOCIATED_GENE	FALSE	79690		[Q96RP7]	79690
821								3.Intra Cellular	3.Intra Cellular, 4.Nuclear Membrane, 5.Nucleus			ENSG00000196497	ASSOCIATED_GENE	IPO4		IPO4		79711			ASSOCIATED_GENE	FALSE	79711		[B3KT38, Q8TEX9]	79711
822								0.Annotation definition not found in 'Homo Sapiens.properties' file	0.Annotation definition not found in 'Homo Sapiens.properties' file			ENSG00000168152	ASSOCIATED_GENE	THAP9		THAP9		79725			ASSOCIATED_GENE	FALSE	79725		[Q9H5L6]	79725
823						Transcription Factor Complex	Transcription Factor Complex	3.Intra Cellular	3.Intra Cellular, 5.Nucleus			ENSG00000129173	ASSOCIATED_GENE	E2F8		E2F8		79733			ASSOCIATED_GENE	FALSE	79733		[A0AVK6]	79733
824								3.Intra Cellular	3.Intra Cellular			ENSG00000104946	ASSOCIATED_GENE	TBC1D17		TBC1D17		79735			ASSOCIATED_GENE	FALSE	79735		[Q9HA65]	79735
825								3.Intra Cellular	3.Intra Cellular			ENSG00000175213	ASSOCIATED_GENE	ZNF408		ZNF408		79797			ASSOCIATED_GENE	FALSE	79797		[B4DXY4, Q9H9D4]	79797
826								0.Annotation definition not found in 'Homo Sapiens.properties' file	0.Annotation definition not found in 'Homo Sapiens.properties' file			ENSG00000120162	ASSOCIATED_GENE	MOB3B		MOB3B		79817			ASSOCIATED_GENE	FALSE	79817		[Q86TA1]	79817
827								2.Plasma Membrane	2.Plasma Membrane, 3.Intra Cellular, 5.Nucleus			ENSG00000050327	ASSOCIATED_GENE	ARHGEF5		ARHGEF5		7984			ASSOCIATED_GENE	FALSE	7984		[Q12774]	7984
828								3.Intra Cellular	3.Intra Cellular, 5.Nucleus			ENSG00000114670	ASSOCIATED_GENE	NEK11		NEK11		79858			ASSOCIATED_GENE	FALSE	79858		[B4DDN2, B4DM56, E9PHI8, Q8NG66]	79858
829								3.Intra Cellular	3.Intra Cellular			ENSG00000178462	ASSOCIATED_GENE	TUBAL3		TUBAL3		79861			ASSOCIATED_GENE	FALSE	79861		[A6NHL2]	79861
830								0.Annotation definition not found in 'Homo Sapiens.properties' file	0.Annotation definition not found in 'Homo Sapiens.properties' file			ENSG00000269313	ASSOCIATED_GENE	MAGIX		MAGIX		79917			ASSOCIATED_GENE	FALSE	79917		[A0A024QZ18, A0A075B7A2, A0A087WUY6, A0A087X263, Q9H6Y5]	79917
831								2.Plasma Membrane	2.Plasma Membrane, 3.Intra Cellular			ENSG00000123815	ASSOCIATED_GENE	COQ8B		COQ8B		79934			ASSOCIATED_GENE	FALSE	79934		[A0A024R0Q9, Q96D53]	79934
832								0.Annotation definition not found in 'Homo Sapiens.properties' file	0.Annotation definition not found in 'Homo Sapiens.properties' file			ENSG00000148735	ASSOCIATED_GENE	PLEKHS1		PLEKHS1		79949			ASSOCIATED_GENE	FALSE	79949		[Q5SXH7]	79949
833								3.Intra Cellular	3.Intra Cellular			ENSG00000144031	ASSOCIATED_GENE	ANKRD53		ANKRD53		79998			ASSOCIATED_GENE	FALSE	79998		[C9JZ61, Q8N9V6]	79998
834								3.Intra Cellular	3.Intra Cellular			ENSG00000155034	ASSOCIATED_GENE	FBXL18		FBXL18		80028			ASSOCIATED_GENE	FALSE	80028		[A0A024R857, B4DH63, Q96D16]	80028
835								2.Plasma Membrane	2.Plasma Membrane			ENSG00000109182	ASSOCIATED_GENE	CWH43		CWH43		80157			ASSOCIATED_GENE	FALSE	80157		[B4DU47, B7ZAJ2, E7EQL2, Q9H720]	80157
836								1.Extracellular	1.Extracellular			ENSG00000164074	ASSOCIATED_GENE	ABHD18		ABHD18		80167			ASSOCIATED_GENE	FALSE	80167		[B7WP89]	80167
837								2.Plasma Membrane	2.Plasma Membrane, 3.Intra Cellular, 5.Nucleus			ENSG00000170633	ASSOCIATED_GENE	RNF34		RNF34		80196			ASSOCIATED_GENE	FALSE	80196		[A0A087WTM5, Q969K3]	80196
838								3.Intra Cellular	3.Intra Cellular			ENSG00000156675	ASSOCIATED_GENE	RAB11FIP1		RAB11FIP1		80223			ASSOCIATED_GENE	FALSE	80223		[Q6WKZ4]	80223
839								1.Extracellular	1.Extracellular, 3.Intra Cellular			ENSG00000115468	ASSOCIATED_GENE	EFHD1		EFHD1		80303			ASSOCIATED_GENE	FALSE	80303		[Q8WYH2, Q9BUP0]	80303
840								3.Intra Cellular	3.Intra Cellular, 5.Nucleus			ENSG00000108061	ASSOCIATED_GENE	SHOC2		SHOC2		8036			ASSOCIATED_GENE	FALSE	8036		[Q9UQ13]	8036
841								3.Intra Cellular	3.Intra Cellular			ENSG00000166266	ASSOCIATED_GENE	CUL5		CUL5		8065			ASSOCIATED_GENE	FALSE	8065		[Q93034]	8065
842								1.Extracellular	1.Extracellular			ENSG00000204396	ASSOCIATED_GENE	VWA7		VWA7		80737			ASSOCIATED_GENE	FALSE	80737		[A0A1U9X8T7, Q9Y334]	80737
843								3.Intra Cellular	3.Intra Cellular, 5.Nucleus			ENSG00000153815	ASSOCIATED_GENE	CMIP		CMIP		80790			ASSOCIATED_GENE	FALSE	80790		[A0A087WU05, Q8IY22]	80790
844								3.Intra Cellular	3.Intra Cellular			ENSG00000032742	ASSOCIATED_GENE	IFT88		IFT88		8100			ASSOCIATED_GENE	FALSE	8100		[A0A140VJL7, B3KX42, Q13099]	8100
845								2.Plasma Membrane	2.Plasma Membrane, 3.Intra Cellular, 5.Nucleus			ENSG00000145817	ASSOCIATED_GENE	YIPF5		YIPF5		81555			ASSOCIATED_GENE	FALSE	81555		[Q969M3]	81555
846								3.Intra Cellular	3.Intra Cellular			ENSG00000110925	ASSOCIATED_GENE	CSRNP2		CSRNP2		81566			ASSOCIATED_GENE	FALSE	81566		[Q9H175]	81566
847								0.Annotation definition not found in 'Homo Sapiens.properties' file	0.Annotation definition not found in 'Homo Sapiens.properties' file			ENSG00000104957	ASSOCIATED_GENE	CCDC130		CCDC130		81576			ASSOCIATED_GENE	FALSE	81576		[B7Z1U2, P13994]	81576
848								1.Extracellular	1.Extracellular, 3.Intra Cellular			ENSG00000102547	ASSOCIATED_GENE	CAB39L		CAB39L		81617			ASSOCIATED_GENE	FALSE	81617		[A0A024RDT3, Q86WE6, Q9H9S4]	81617
849								3.Intra Cellular	3.Intra Cellular			ENSG00000139734	ASSOCIATED_GENE	DIAPH3		DIAPH3		81624			ASSOCIATED_GENE	FALSE	81624		[B4DPV3, Q9NSV4]	81624
850								3.Intra Cellular	3.Intra Cellular			ENSG00000146054	ASSOCIATED_GENE	TRIM7		TRIM7		81786			ASSOCIATED_GENE	FALSE	81786		[Q9C029]	81786
851								2.Plasma Membrane	2.Plasma Membrane			ENSG00000171208	ASSOCIATED_GENE	NETO2		NETO2		81831			ASSOCIATED_GENE	FALSE	81831		[Q32NC3, Q8NC67]	81831
852								1.Extracellular	1.Extracellular, 2.Plasma Membrane, 3.Intra Cellular, 5.Nucleus			ENSG00000124151	ASSOCIATED_GENE	NCOA3		NCOA3		8202			ASSOCIATED_GENE	FALSE	8202		[Q59EE8, Q9Y6Q9]	8202
853								2.Plasma Membrane	2.Plasma Membrane, 3.Intra Cellular			ENSG00000073921	ASSOCIATED_GENE	PICALM		PICALM		8301			ASSOCIATED_GENE	FALSE	8301		[A0A024R5L7, A0A024R5P1, Q13492]	8301
854								3.Intra Cellular	3.Intra Cellular			ENSG00000110619	ASSOCIATED_GENE	CARS		CARS		833			ASSOCIATED_GENE	FALSE	833		[A0A024RCG3, A8MVQ3, B4DKY1, B4DPV7, P49589]	833
855								1.Extracellular	1.Extracellular, 2.Plasma Membrane, 3.Intra Cellular			ENSG00000130300	ASSOCIATED_GENE	PLVAP		PLVAP		83483			ASSOCIATED_GENE	FALSE	83483		[Q9BX97]	83483
856								3.Intra Cellular	3.Intra Cellular			ENSG00000127081	ASSOCIATED_GENE	ZNF484		ZNF484		83744			ASSOCIATED_GENE	FALSE	83744		[Q5JVG2]	83744
857								3.Intra Cellular	3.Intra Cellular			ENSG00000109762	ASSOCIATED_GENE	SNX25		SNX25		83891			ASSOCIATED_GENE	FALSE	83891		[Q9H3E2]	83891
858								0.Annotation definition not found in 'Homo Sapiens.properties' file	0.Annotation definition not found in 'Homo Sapiens.properties' file			ENSG00000137936	ASSOCIATED_GENE	BCAR3		BCAR3		8412			ASSOCIATED_GENE	FALSE	8412		[B3KNL6, B3KP06, O75815]	8412
859								3.Intra Cellular	3.Intra Cellular, 5.Nucleus			ENSG00000196275	ASSOCIATED_GENE	GTF2IRD2		GTF2IRD2		84163			ASSOCIATED_GENE	FALSE	84163		[Q86UP8]	84163
860								0.Annotation definition not found in 'Homo Sapiens.properties' file	0.Annotation definition not found in 'Homo Sapiens.properties' file			ENSG00000127720	ASSOCIATED_GENE	METTL25		METTL25		84190			ASSOCIATED_GENE	FALSE	84190		[Q8N6Q8]	84190
861								3.Intra Cellular	3.Intra Cellular, 5.Nucleus			ENSG00000137288	ASSOCIATED_GENE	UQCC2		UQCC2		84300			ASSOCIATED_GENE	FALSE	84300		[Q9BRT2]	84300
862								3.Intra Cellular	3.Intra Cellular			ENSG00000164077	ASSOCIATED_GENE	MON1A		MON1A		84315			ASSOCIATED_GENE	FALSE	84315		[Q86VX9, X6R3V9]	84315
863								3.Intra Cellular	3.Intra Cellular			ENSG00000272617	ASSOCIATED_GENE	COG8		COG8		84342			ASSOCIATED_GENE	FALSE	84342		[A0A024R6Z6, Q96MW5]	84342
864								3.Intra Cellular	3.Intra Cellular			ENSG00000116906	ASSOCIATED_GENE	GNPAT		GNPAT		8443			ASSOCIATED_GENE	FALSE	8443		[O15228]	8443
865								3.Intra Cellular	3.Intra Cellular			ENSG00000165443	ASSOCIATED_GENE	PHYHIPL		PHYHIPL		84457			ASSOCIATED_GENE	FALSE	84457		[Q96FC7]	84457
866								1.Extracellular	1.Extracellular, 3.Intra Cellular, 5.Nucleus			ENSG00000036257	ASSOCIATED_GENE	CUL3		CUL3		8452			ASSOCIATED_GENE	FALSE	8452		[A0A024R475, B7Z600, Q13618]	8452
867								3.Intra Cellular	3.Intra Cellular			ENSG00000154930	ASSOCIATED_GENE	ACSS1		ACSS1		84532			ASSOCIATED_GENE	FALSE	84532		[Q1RMZ4, Q9NUB1]	84532
868								3.Intra Cellular	3.Intra Cellular, 5.Nucleus			ENSG00000140632	ASSOCIATED_GENE	GLYR1		GLYR1		84656			ASSOCIATED_GENE	FALSE	84656		[D3DUE6, Q49A26, Q9NZ78]	84656
869								3.Intra Cellular	3.Intra Cellular			ENSG00000179111	ASSOCIATED_GENE	HES7		HES7		84667			ASSOCIATED_GENE	FALSE	84667		[Q9BYE0]	84667
870								3.Intra Cellular	3.Intra Cellular			ENSG00000141255	ASSOCIATED_GENE	SPATA22		SPATA22		84690			ASSOCIATED_GENE	FALSE	84690		[A0A140VJV9, B4DHW8, F5GWB9, Q8NHS9]	84690
871								2.Plasma Membrane	2.Plasma Membrane			ENSG00000163702	ASSOCIATED_GENE	IL17RC		IL17RC		84818			ASSOCIATED_GENE	FALSE	84818		[Q8NAC3]	84818
872								2.Plasma Membrane	2.Plasma Membrane, 3.Intra Cellular			ENSG00000132185	ASSOCIATED_GENE	FCRLA		FCRLA		84824			ASSOCIATED_GENE	FALSE	84824		[Q6MZF2, Q7L513]	84824
873								3.Intra Cellular	3.Intra Cellular			ENSG00000173976	ASSOCIATED_GENE	RAX2		RAX2		84839			ASSOCIATED_GENE	FALSE	84839		[Q96IS3]	84839
874								3.Intra Cellular	3.Intra Cellular			ENSG00000099910	ASSOCIATED_GENE	KLHL22		KLHL22		84861			ASSOCIATED_GENE	FALSE	84861		[Q53GT1]	84861
875								2.Plasma Membrane	2.Plasma Membrane			ENSG00000144820	ASSOCIATED_GENE	ADGRG7		ADGRG7		84873			ASSOCIATED_GENE	FALSE	84873		[B7Z303, E9PHI0, Q6ZMH4, Q96K78]	84873
876								3.Intra Cellular	3.Intra Cellular			ENSG00000167549	ASSOCIATED_GENE	CORO6		CORO6		84940			ASSOCIATED_GENE	FALSE	84940		[B3KRY9, B3KSZ9, Q6QEF8]	84940
877								2.Plasma Membrane	2.Plasma Membrane, 3.Intra Cellular			ENSG00000139826	ASSOCIATED_GENE	ABHD13		ABHD13		84945			ASSOCIATED_GENE	FALSE	84945		[A0A024RDX1, Q7L211]	84945
878								2.Plasma Membrane	2.Plasma Membrane, 3.Intra Cellular			ENSG00000110841	ASSOCIATED_GENE	PPFIBP1		PPFIBP1		8496			ASSOCIATED_GENE	FALSE	8496		[A0A024RB02, Q86W92]	8496
879								2.Plasma Membrane	2.Plasma Membrane, 3.Intra Cellular			ENSG00000117461	ASSOCIATED_GENE	PIK3R3		PIK3R3		8503			ASSOCIATED_GENE	FALSE	8503		[B4DXM8, Q68CY7, Q7Z3W2, Q8N381, Q92569]	8503
880								2.Plasma Membrane	2.Plasma Membrane, 3.Intra Cellular			ENSG00000166507	ASSOCIATED_GENE	NDST2		NDST2		8509			ASSOCIATED_GENE	FALSE	8509		[B4DE98, B4DU70, B4E139, P52849, S4R438]	8509
881								1.Extracellular	1.Extracellular			ENSG00000109625	ASSOCIATED_GENE	CPZ		CPZ		8532			ASSOCIATED_GENE	FALSE	8532		[Q66K79]	8532
882								3.Intra Cellular	3.Intra Cellular			ENSG00000105137	ASSOCIATED_GENE	SYDE1		SYDE1		85360			ASSOCIATED_GENE	FALSE	85360		[Q6ZW31]	85360
883								3.Intra Cellular	3.Intra Cellular, 5.Nucleus			ENSG00000140022	ASSOCIATED_GENE	STON2		STON2		85439			ASSOCIATED_GENE	FALSE	85439		[Q8WXE9]	85439
884								0.Annotation definition not found in 'Homo Sapiens.properties' file	0.Annotation definition not found in 'Homo Sapiens.properties' file			ENSG00000139537	ASSOCIATED_GENE	CCDC65		CCDC65		85478			ASSOCIATED_GENE	FALSE	85478		[B4DXQ7, Q8IXS2]	85478
885								2.Plasma Membrane	2.Plasma Membrane, 3.Intra Cellular			ENSG00000182533	ASSOCIATED_GENE	CAV3		CAV3		859			ASSOCIATED_GENE	FALSE	859		[A0A024R2D8, P56539]	859
886								0.Annotation definition not found in 'Homo Sapiens.properties' file	0.Annotation definition not found in 'Homo Sapiens.properties' file			ENSG00000125386	ASSOCIATED_GENE	FAM193A		FAM193A		8603			ASSOCIATED_GENE	FALSE	8603		[P78312]	8603
887								3.Intra Cellular	3.Intra Cellular, 5.Nucleus			ENSG00000159216	ASSOCIATED_GENE	RUNX1		RUNX1		861			ASSOCIATED_GENE	FALSE	861		[Q01196]	861
888								3.Intra Cellular	3.Intra Cellular			ENSG00000187775	ASSOCIATED_GENE	DNAH17		DNAH17		8632			ASSOCIATED_GENE	FALSE	8632			8632
889								3.Intra Cellular	3.Intra Cellular			ENSG00000175390	ASSOCIATED_GENE	EIF3F		EIF3F		8665			ASSOCIATED_GENE	FALSE	8665		[O00303]	8665
890								3.Intra Cellular	3.Intra Cellular			ENSG00000130811	ASSOCIATED_GENE	EIF3G		EIF3G		8666			ASSOCIATED_GENE	FALSE	8666		[O75821]	8666
891								3.Intra Cellular	3.Intra Cellular, 5.Nucleus			ENSG00000094880	ASSOCIATED_GENE	CDC23		CDC23		8697			ASSOCIATED_GENE	FALSE	8697		[Q9UJX2]	8697
892								2.Plasma Membrane	2.Plasma Membrane, 3.Intra Cellular			ENSG00000102871	ASSOCIATED_GENE	TRADD		TRADD		8717			ASSOCIATED_GENE	FALSE	8717		[Q15628]	8717
893								2.Plasma Membrane	2.Plasma Membrane, 3.Intra Cellular			ENSG00000135074	ASSOCIATED_GENE	ADAM19		ADAM19		8728			ASSOCIATED_GENE	FALSE	8728		[Q8TBU7, Q9H013]	8728
894								3.Intra Cellular	3.Intra Cellular			ENSG00000185972	ASSOCIATED_GENE	CCIN		CCIN		881			ASSOCIATED_GENE	FALSE	881		[Q13939, Q8WWB2, Q8WX35]	881
895								3.Intra Cellular	3.Intra Cellular, 5.Nucleus			ENSG00000090061	ASSOCIATED_GENE	CCNK		CCNK		8812			ASSOCIATED_GENE	FALSE	8812		[A0A024R6K1, O75909]	8812
896								3.Intra Cellular	3.Intra Cellular			ENSG00000172831	ASSOCIATED_GENE	CES2		CES2		8824			ASSOCIATED_GENE	FALSE	8824		[A0A024R6X1, O00748]	8824
897								2.Plasma Membrane	2.Plasma Membrane, 3.Intra Cellular			ENSG00000176170	ASSOCIATED_GENE	SPHK1		SPHK1		8877			ASSOCIATED_GENE	FALSE	8877		[Q53ZR5, Q9NYA1]	8877
898								3.Intra Cellular	3.Intra Cellular			ENSG00000125977	ASSOCIATED_GENE	EIF2S2		EIF2S2		8894			ASSOCIATED_GENE	FALSE	8894		[P20042, Q6IBR8]	8894
899								2.Plasma Membrane	2.Plasma Membrane			ENSG00000196557	ASSOCIATED_GENE	CACNA1H		CACNA1H		8912			ASSOCIATED_GENE	FALSE	8912		[A0A1W2PQW2, B3KQH9, O95180]	8912
900								3.Intra Cellular	3.Intra Cellular			ENSG00000103657	ASSOCIATED_GENE	HERC1		HERC1		8925			ASSOCIATED_GENE	FALSE	8925		[A0A024R5W0, Q15751]	8925
901								2.Plasma Membrane	2.Plasma Membrane, 3.Intra Cellular			ENSG00000171450	ASSOCIATED_GENE	CDK5R2		CDK5R2		8941			ASSOCIATED_GENE	FALSE	8941		[Q13319]	8941
902								3.Intra Cellular	3.Intra Cellular			ENSG00000197948	ASSOCIATED_GENE	FCHSD1		FCHSD1		89848			ASSOCIATED_GENE	FALSE	89848		[Q86WN1]	89848
903								2.Plasma Membrane	2.Plasma Membrane, 3.Intra Cellular			ENSG00000147378	ASSOCIATED_GENE	FATE1		FATE1		89885			ASSOCIATED_GENE	FALSE	89885		[Q969F0]	89885
904								1.Extracellular	1.Extracellular			ENSG00000159579	ASSOCIATED_GENE	RSPRY1		RSPRY1		89970			ASSOCIATED_GENE	FALSE	89970		[A0A024R6U0, Q96DX4]	89970
905								0.Annotation definition not found in 'Homo Sapiens.properties' file	0.Annotation definition not found in 'Homo Sapiens.properties' file			ENSG00000140067	ASSOCIATED_GENE	FAM181A		FAM181A		90050			ASSOCIATED_GENE	FALSE	90050		[Q8N9Y4]	90050
906								2.Plasma Membrane	2.Plasma Membrane			ENSG00000157570	ASSOCIATED_GENE	TSPAN18		TSPAN18		90139			ASSOCIATED_GENE	FALSE	90139		[Q96SJ8]	90139
907								3.Intra Cellular	3.Intra Cellular, 5.Nucleus			ENSG00000112130	ASSOCIATED_GENE	RNF8		RNF8		9025			ASSOCIATED_GENE	FALSE	9025		[O76064]	9025
908								2.Plasma Membrane	2.Plasma Membrane, 3.Intra Cellular			ENSG00000130787	ASSOCIATED_GENE	HIP1R		HIP1R		9026			ASSOCIATED_GENE	FALSE	9026		[B3KQW8, B4DPL0, O75146]	9026
909								2.Plasma Membrane	2.Plasma Membrane, 3.Intra Cellular			ENSG00000250565	ASSOCIATED_GENE	ATP6V1E2		ATP6V1E2		90423			ASSOCIATED_GENE	FALSE	90423		[A0A140VKA8, Q96A05]	90423
910								3.Intra Cellular	3.Intra Cellular, 5.Nucleus			ENSG00000173545	ASSOCIATED_GENE	ZNF622		ZNF622		90441			ASSOCIATED_GENE	FALSE	90441		[Q969S3]	90441
911								1.Extracellular	1.Extracellular, 3.Intra Cellular, 5.Nucleus			ENSG00000117407	ASSOCIATED_GENE	ARTN		ARTN		9048			ASSOCIATED_GENE	FALSE	9048		[Q5T4W7]	9048
912								2.Plasma Membrane	2.Plasma Membrane, 3.Intra Cellular, 5.Nucleus			ENSG00000146147	ASSOCIATED_GENE	MLIP		MLIP		90523			ASSOCIATED_GENE	FALSE	90523		[Q5VWP3]	90523
913								1.Extracellular	1.Extracellular, 3.Intra Cellular			ENSG00000169193	ASSOCIATED_GENE	CCDC126		CCDC126		90693			ASSOCIATED_GENE	FALSE	90693		[A0A024RA08, Q96EE4]	90693
914								0.Annotation definition not found in 'Homo Sapiens.properties' file	0.Annotation definition not found in 'Homo Sapiens.properties' file			ENSG00000167962	ASSOCIATED_GENE	ZNF598		ZNF598		90850			ASSOCIATED_GENE	FALSE	90850		[Q86UK7]	90850
915								2.Plasma Membrane	2.Plasma Membrane, 3.Intra Cellular			ENSG00000007541	ASSOCIATED_GENE	PIGQ		PIGQ		9091			ASSOCIATED_GENE	FALSE	9091		[B2RAU6, Q9BRB3]	9091
916								3.Intra Cellular	3.Intra Cellular, 5.Nucleus			ENSG00000036672	ASSOCIATED_GENE	USP2		USP2		9099			ASSOCIATED_GENE	FALSE	9099		[O75604]	9099
917								0.Annotation definition not found in 'Homo Sapiens.properties' file	0.Annotation definition not found in 'Homo Sapiens.properties' file			ENSG00000181982	ASSOCIATED_GENE	CCDC149		CCDC149		91050			ASSOCIATED_GENE	FALSE	91050		[A0A0U1RQD2, Q6ZUS6]	91050
918								2.Plasma Membrane	2.Plasma Membrane			ENSG00000168679	ASSOCIATED_GENE	SLC16A4		SLC16A4		9122			ASSOCIATED_GENE	FALSE	9122		[O15374]	9122
919						Transcription Factor Complex	Transcription Factor Complex	3.Intra Cellular	3.Intra Cellular			ENSG00000107438	ASSOCIATED_GENE	PDLIM1		PDLIM1		9124			ASSOCIATED_GENE	FALSE	9124		[O00151, V9HW92]	9124
920								0.Annotation definition not found in 'Homo Sapiens.properties' file	0.Annotation definition not found in 'Homo Sapiens.properties' file			ENSG00000154945	ASSOCIATED_GENE	ANKRD40		ANKRD40		91369			ASSOCIATED_GENE	FALSE	91369		[A8IK34, Q6AI12]	91369
921								3.Intra Cellular	3.Intra Cellular, 5.Nucleus			ENSG00000171953	ASSOCIATED_GENE	ATPAF2		ATPAF2		91647			ASSOCIATED_GENE	FALSE	91647		[Q8N5M1]	91647
922								2.Plasma Membrane	2.Plasma Membrane, 3.Intra Cellular, 5.Nucleus			ENSG00000083896	ASSOCIATED_GENE	YTHDC1		YTHDC1		91746			ASSOCIATED_GENE	FALSE	91746		[J3QR07, Q96MU7]	91746
923								2.Plasma Membrane	2.Plasma Membrane			ENSG00000133083	ASSOCIATED_GENE	DCLK1		DCLK1		9201			ASSOCIATED_GENE	FALSE	9201		[B7Z5K4, O15075, Q5VZY9]	9201
924								3.Intra Cellular	3.Intra Cellular, 5.Nucleus			ENSG00000147130	ASSOCIATED_GENE	ZMYM3		ZMYM3		9203			ASSOCIATED_GENE	FALSE	9203		[A8K3Z7, Q14202]	9203
925								3.Intra Cellular	3.Intra Cellular, 5.Nucleus			ENSG00000178999	ASSOCIATED_GENE	AURKB		AURKB		9212			ASSOCIATED_GENE	FALSE	9212		[Q96GD4]	9212
926								2.Plasma Membrane	2.Plasma Membrane, 3.Intra Cellular, 4.Nuclear Membrane, 5.Nucleus			ENSG00000101558	ASSOCIATED_GENE	VAPA		VAPA		9218			ASSOCIATED_GENE	FALSE	9218		[Q9P0L0]	9218
927								3.Intra Cellular	3.Intra Cellular			ENSG00000162949	ASSOCIATED_GENE	CAPN13		CAPN13		92291			ASSOCIATED_GENE	FALSE	92291		[Q6MZZ7]	92291
928								3.Intra Cellular	3.Intra Cellular			ENSG00000105245	ASSOCIATED_GENE	NUMBL		NUMBL		9253			ASSOCIATED_GENE	FALSE	9253		[A0A0C4DGH3, A8K033, B7Z5W0, Q9Y6R0]	9253
929								3.Intra Cellular	3.Intra Cellular, 5.Nucleus			ENSG00000127311	ASSOCIATED_GENE	HELB		HELB		92797			ASSOCIATED_GENE	FALSE	92797		[Q8NG08]	92797
930								3.Intra Cellular	3.Intra Cellular, 5.Nucleus			ENSG00000136718	ASSOCIATED_GENE	IMP4		IMP4		92856			ASSOCIATED_GENE	FALSE	92856		[E7ENR5, Q96G21]	92856
931								3.Intra Cellular	3.Intra Cellular			ENSG00000143889	ASSOCIATED_GENE	HNRNPLL		HNRNPLL		92906			ASSOCIATED_GENE	FALSE	92906		[A0A0S2Z6K1, A8K894, Q8WVV9]	92906
932								1.Extracellular	1.Extracellular, 3.Intra Cellular			ENSG00000178031	ASSOCIATED_GENE	ADAMTSL1		ADAMTSL1		92949			ASSOCIATED_GENE	FALSE	92949		[Q6MZQ3, Q8N6G6]	92949
933								3.Intra Cellular	3.Intra Cellular, 5.Nucleus			ENSG00000153827	ASSOCIATED_GENE	TRIP12		TRIP12		9320			ASSOCIATED_GENE	FALSE	9320		[Q14669]	9320
934								3.Intra Cellular	3.Intra Cellular			ENSG00000105479	ASSOCIATED_GENE	CCDC114		CCDC114		93233			ASSOCIATED_GENE	FALSE	93233		[Q96M63]	93233
935								1.Extracellular	1.Extracellular			ENSG00000158525	ASSOCIATED_GENE	CPA5		CPA5		93979			ASSOCIATED_GENE	FALSE	93979		[A4D1M2, B2RCS8, Q8WXQ8]	93979
936								3.Intra Cellular	3.Intra Cellular, 5.Nucleus			ENSG00000132485	ASSOCIATED_GENE	ZRANB2		ZRANB2		9406			ASSOCIATED_GENE	FALSE	9406		[O95218]	9406
937								2.Plasma Membrane	2.Plasma Membrane, 3.Intra Cellular			ENSG00000164674	ASSOCIATED_GENE	SYTL3		SYTL3		94120			ASSOCIATED_GENE	FALSE	94120		[B4E2A9, Q4VX76]	94120
938								1.Extracellular	1.Extracellular, 2.Plasma Membrane, 3.Intra Cellular			ENSG00000114013	ASSOCIATED_GENE	CD86		CD86		942			ASSOCIATED_GENE	FALSE	942		[A0A0X9R4E0, A8K632, P42081]	942
939								2.Plasma Membrane	2.Plasma Membrane, 3.Intra Cellular			ENSG00000118777	ASSOCIATED_GENE	ABCG2		ABCG2		9429			ASSOCIATED_GENE	FALSE	9429		[A0A024RDD4, Q9UNQ0]	9429
940								3.Intra Cellular	3.Intra Cellular, 5.Nucleus			ENSG00000105085	ASSOCIATED_GENE	MED26		MED26		9441			ASSOCIATED_GENE	FALSE	9441		[O95402]	9441
941								1.Extracellular	1.Extracellular, 3.Intra Cellular			ENSG00000148834	ASSOCIATED_GENE	GSTO1		GSTO1		9446			ASSOCIATED_GENE	FALSE	9446		[P78417, V9HWG9]	9446
942								3.Intra Cellular	3.Intra Cellular			ENSG00000131370	ASSOCIATED_GENE	SH3BP5		SH3BP5		9467			ASSOCIATED_GENE	FALSE	9467		[A0A024R2G6, A0A024R2J3, O60239]	9467
943								1.Extracellular	1.Extracellular, 2.Plasma Membrane, 3.Intra Cellular			ENSG00000073060	ASSOCIATED_GENE	SCARB1		SCARB1		949			ASSOCIATED_GENE	FALSE	949		[A0A024RBS4, Q8WTV0]	949
944								2.Plasma Membrane	2.Plasma Membrane, 3.Intra Cellular			ENSG00000105819	ASSOCIATED_GENE	PMPCB		PMPCB		9512			ASSOCIATED_GENE	FALSE	9512		[B3KM34, O75439, Q96CP5]	9512
945								2.Plasma Membrane	2.Plasma Membrane, 3.Intra Cellular			ENSG00000100596	ASSOCIATED_GENE	SPTLC2		SPTLC2		9517			ASSOCIATED_GENE	FALSE	9517		[A0A024R6H1, O15270]	9517
946								2.Plasma Membrane	2.Plasma Membrane, 3.Intra Cellular			ENSG00000108587	ASSOCIATED_GENE	GOSR1		GOSR1		9527			ASSOCIATED_GENE	FALSE	9527		[E9PCW1, O95249]	9527
947								1.Extracellular	1.Extracellular, 2.Plasma Membrane, 3.Intra Cellular			ENSG00000105514	ASSOCIATED_GENE	RAB3D		RAB3D		9545			ASSOCIATED_GENE	FALSE	9545		[A0A024R7G2, O95716]	9545
948								3.Intra Cellular	3.Intra Cellular, 5.Nucleus			ENSG00000131051	ASSOCIATED_GENE	RBM39		RBM39		9584			ASSOCIATED_GENE	FALSE	9584		[B4DRA0, E1P5S2, Q14498, Q6N037]	9584
949								2.Plasma Membrane	2.Plasma Membrane, 3.Intra Cellular, 5.Nucleus			ENSG00000075275	ASSOCIATED_GENE	CELSR1		CELSR1		9620			ASSOCIATED_GENE	FALSE	9620		[Q9NYQ6]	9620
950								2.Plasma Membrane	2.Plasma Membrane, 3.Intra Cellular, 5.Nucleus			ENSG00000123562	ASSOCIATED_GENE	MORF4L2		MORF4L2		9643			ASSOCIATED_GENE	FALSE	9643		[Q15014]	9643
951								3.Intra Cellular	3.Intra Cellular			ENSG00000217128	ASSOCIATED_GENE	FNIP1		FNIP1		96459			ASSOCIATED_GENE	FALSE	96459		[J3KNG8, Q8TF40]	96459
952								3.Intra Cellular	3.Intra Cellular, 5.Nucleus			ENSG00000135968	ASSOCIATED_GENE	GCC2		GCC2		9648			ASSOCIATED_GENE	FALSE	9648		[B3KR21, Q8IWJ2]	9648
953								3.Intra Cellular	3.Intra Cellular			ENSG00000171150	ASSOCIATED_GENE	SOCS5		SOCS5		9655			ASSOCIATED_GENE	FALSE	9655		[O75159]	9655
954								3.Intra Cellular	3.Intra Cellular			ENSG00000101493	ASSOCIATED_GENE	ZNF516		ZNF516		9658			ASSOCIATED_GENE	FALSE	9658		[Q2YDX2, Q92618]	9658
955								3.Intra Cellular	3.Intra Cellular			ENSG00000166783	ASSOCIATED_GENE	MARF1		MARF1		9665			ASSOCIATED_GENE	FALSE	9665		[Q9Y4F3]	9665
956								1.Extracellular	1.Extracellular, 3.Intra Cellular, 5.Nucleus			ENSG00000130254	ASSOCIATED_GENE	SAFB2		SAFB2		9667			ASSOCIATED_GENE	FALSE	9667		[Q14151]	9667
957								1.Extracellular	1.Extracellular, 2.Plasma Membrane, 3.Intra Cellular			ENSG00000058453	ASSOCIATED_GENE	CROCC		CROCC		9696			ASSOCIATED_GENE	FALSE	9696		[Q5TZA2]	9696
958								3.Intra Cellular	3.Intra Cellular, 5.Nucleus			ENSG00000134644	ASSOCIATED_GENE	PUM1		PUM1		9698			ASSOCIATED_GENE	FALSE	9698		[Q14671]	9698
959								3.Intra Cellular	3.Intra Cellular, 5.Nucleus			ENSG00000145016	ASSOCIATED_GENE	RUBCN		RUBCN		9711			ASSOCIATED_GENE	FALSE	9711		[Q8N4U6, Q92622]	9711
960								2.Plasma Membrane	2.Plasma Membrane, 3.Intra Cellular, 5.Nucleus			ENSG00000128512	ASSOCIATED_GENE	DOCK4		DOCK4		9732			ASSOCIATED_GENE	FALSE	9732		[Q8N1I0]	9732
961								3.Intra Cellular	3.Intra Cellular			ENSG00000187535	ASSOCIATED_GENE	IFT140		IFT140		9742			ASSOCIATED_GENE	FALSE	9742		[Q96RY7]	9742
962								2.Plasma Membrane	2.Plasma Membrane, 3.Intra Cellular			ENSG00000111913	ASSOCIATED_GENE	RIPOR2		RIPOR2		9750			ASSOCIATED_GENE	FALSE	9750		[A0A024QZY9, A0A024R028, B7Z5J9, B7Z6D6, B7Z6U4, F5GX51, F5H029, Q9Y4F9]	9750
963								3.Intra Cellular	3.Intra Cellular, 5.Nucleus			ENSG00000140829	ASSOCIATED_GENE	DHX38		DHX38		9785			ASSOCIATED_GENE	FALSE	9785		[Q92620]	9785
964								3.Intra Cellular	3.Intra Cellular			ENSG00000132694	ASSOCIATED_GENE	ARHGEF11		ARHGEF11		9826			ASSOCIATED_GENE	FALSE	9826		[O15085]	9826
965								1.Extracellular	1.Extracellular, 3.Intra Cellular			ENSG00000198853	ASSOCIATED_GENE	RUSC2		RUSC2		9853			ASSOCIATED_GENE	FALSE	9853		[Q8N2Y8]	9853
966								2.Plasma Membrane	2.Plasma Membrane, 3.Intra Cellular			ENSG00000198589	ASSOCIATED_GENE	LRBA		LRBA		987			ASSOCIATED_GENE	FALSE	987		[P50851]	987
967								3.Intra Cellular	3.Intra Cellular			ENSG00000137478	ASSOCIATED_GENE	FCHSD2		FCHSD2		9873			ASSOCIATED_GENE	FALSE	9873		[O94868]	9873
968								1.Extracellular	1.Extracellular, 3.Intra Cellular			ENSG00000136111	ASSOCIATED_GENE	TBC1D4		TBC1D4		9882			ASSOCIATED_GENE	FALSE	9882		[O60343]	9882
969								2.Plasma Membrane	2.Plasma Membrane, 3.Intra Cellular			ENSG00000072422	ASSOCIATED_GENE	RHOBTB1		RHOBTB1		9886			ASSOCIATED_GENE	FALSE	9886		[A0A024QZL4, O94844]	9886
970								2.Plasma Membrane	2.Plasma Membrane			ENSG00000117600	ASSOCIATED_GENE	PLPPR4		PLPPR4		9890			ASSOCIATED_GENE	FALSE	9890		[Q7Z2D5]	9890
971								3.Intra Cellular	3.Intra Cellular, 5.Nucleus			ENSG00000143569	ASSOCIATED_GENE	UBAP2L		UBAP2L		9898			ASSOCIATED_GENE	FALSE	9898		[B4DYY5, F8W726, Q14157]	9898
972								2.Plasma Membrane	2.Plasma Membrane, 3.Intra Cellular			ENSG00000196220	ASSOCIATED_GENE	SRGAP3		SRGAP3		9901			ASSOCIATED_GENE	FALSE	9901		[O43295]	9901
973								2.Plasma Membrane	2.Plasma Membrane			ENSG00000011028	ASSOCIATED_GENE	MRC2		MRC2		9902			ASSOCIATED_GENE	FALSE	9902		[Q9UBG0]	9902
974								3.Intra Cellular	3.Intra Cellular			ENSG00000022840	ASSOCIATED_GENE	RNF10		RNF10		9921			ASSOCIATED_GENE	FALSE	9921		[A0A024RBP0, Q8N5U6]	9921
975								3.Intra Cellular	3.Intra Cellular			ENSG00000135473	ASSOCIATED_GENE	PAN2		PAN2		9924			ASSOCIATED_GENE	FALSE	9924		[Q504Q3]	9924
976								1.Extracellular	1.Extracellular, 2.Plasma Membrane, 3.Intra Cellular			ENSG00000172939	ASSOCIATED_GENE	OXSR1		OXSR1		9943			ASSOCIATED_GENE	FALSE	9943		[A0A024R2M7, O95747]	9943
977								3.Intra Cellular	3.Intra Cellular, 5.Nucleus			ENSG00000108510	ASSOCIATED_GENE	MED13		MED13		9969			ASSOCIATED_GENE	FALSE	9969		[A0A024QZ75, Q9UHV7]	9969
978								3.Intra Cellular	3.Intra Cellular, 5.Nucleus			ENSG00000174738	ASSOCIATED_GENE	NR1D2		NR1D2		9975			ASSOCIATED_GENE	FALSE	9975		[B4DXD3, F1D8P2, Q14995]	9975
979								1.Extracellular	1.Extracellular, 3.Intra Cellular, 5.Nucleus			ENSG00000152795	ASSOCIATED_GENE	HNRNPDL		HNRNPDL		9987			ASSOCIATED_GENE	FALSE	9987		[A0A024RDF6, A0A087WUK2, O14979]	9987
980								1.Extracellular	1.Extracellular, 2.Plasma Membrane, 3.Intra Cellular			ENSG00000039068	ASSOCIATED_GENE	CDH1		CDH1		999			ASSOCIATED_GENE	FALSE	999		[A0A0U2ZQU7, B3GN61, P12830, Q9UII7]	999
1876								0.Annotation definition not found in 'Homo Sapiens.properties' file	0.Annotation definition not found in 'Homo Sapiens.properties' file				MIMAT0000265	hsa-miR-204-5p		hsa-miR-204-5p		MIMAT0000265			ASSOCIATED_NEW_GENE	FALSE	MIMAT0000265			MIMAT0000265
1877								0.Annotation definition not found in 'Homo Sapiens.properties' file	0.Annotation definition not found in 'Homo Sapiens.properties' file				MIMAT0000765	hsa-miR-335-5p		hsa-miR-335-5p		MIMAT0000765			ASSOCIATED_NEW_GENE	FALSE	MIMAT0000765			MIMAT0000765
1878								0.Annotation definition not found in 'Homo Sapiens.properties' file	0.Annotation definition not found in 'Homo Sapiens.properties' file				MIMAT0003308	hsa-miR-638		hsa-miR-638		MIMAT0003308			ASSOCIATED_NEW_GENE	FALSE	MIMAT0003308			MIMAT0003308
1879								0.Annotation definition not found in 'Homo Sapiens.properties' file	0.Annotation definition not found in 'Homo Sapiens.properties' file				MIMAT0003883	hsa-miR-767-3p		hsa-miR-767-3p		MIMAT0003883			ASSOCIATED_NEW_GENE	FALSE	MIMAT0003883			MIMAT0003883
1880								0.Annotation definition not found in 'Homo Sapiens.properties' file	0.Annotation definition not found in 'Homo Sapiens.properties' file				MIMAT0004748	hsa-miR-423-5p		hsa-miR-423-5p		MIMAT0004748			ASSOCIATED_NEW_GENE	FALSE	MIMAT0004748			MIMAT0004748
1881								0.Annotation definition not found in 'Homo Sapiens.properties' file	0.Annotation definition not found in 'Homo Sapiens.properties' file				MIMAT0004800	hsa-miR-550a-5p		hsa-miR-550a-5p		MIMAT0004800			ASSOCIATED_NEW_GENE	FALSE	MIMAT0004800			MIMAT0004800
1882								0.Annotation definition not found in 'Homo Sapiens.properties' file	0.Annotation definition not found in 'Homo Sapiens.properties' file				MIMAT0004982	hsa-miR-939-5p		hsa-miR-939-5p		MIMAT0004982			ASSOCIATED_NEW_GENE	FALSE	MIMAT0004982			MIMAT0004982
1883								0.Annotation definition not found in 'Homo Sapiens.properties' file	0.Annotation definition not found in 'Homo Sapiens.properties' file				hsa-miR-146a*	hsa-miR-146a*		hsa-miR-146a*		hsa-miR-146a*			ASSOCIATED_NEW_GENE	FALSE	hsa-miR-146a*			hsa-miR-146a*
1884								0.Annotation definition not found in 'Homo Sapiens.properties' file	0.Annotation definition not found in 'Homo Sapiens.properties' file				hsa-miR-149*	hsa-miR-149*		hsa-miR-149*		hsa-miR-149*			ASSOCIATED_NEW_GENE	FALSE	hsa-miR-149*			hsa-miR-149*
1885								0.Annotation definition not found in 'Homo Sapiens.properties' file	0.Annotation definition not found in 'Homo Sapiens.properties' file				hsa-miR-18b*	hsa-miR-18b*		hsa-miR-18b*		hsa-miR-18b*			ASSOCIATED_NEW_GENE	FALSE	hsa-miR-18b*			hsa-miR-18b*

## Sheet: mirnmfge8 default  edge
SUID	1-PVALUE_OG-v5	ACTION_DIRECTION	ACTION_SCORE	ACTION_TYPE	edge-label	EDGE_UNIQUE_SUID	EVIDENCE_CODE	INITIAL_SOURCE_NAME	INITIAL_TARGET_NAME	interaction	INTERACTION_TYPE	KappaScore	miRanda-SCORE-v5	name	Regulates Source	Regulates Target	selected	shared interaction	shared name	SIGNUM	SOURCE_NAME	SOURCE_SYMBOL_NAME	TARGET_NAME	TARGET_SYMBOL_NAME	UNIQUE_ID	validated miRNA	validated miRTarBase
1896					miRanda-SCORE-v5	1896		ENST00000376704	hsa-miR-335	gene-gene-pos	#NAME?	0.643344	0.643344				FALSE	gene-gene-pos		#NAME?	10107	TRIM10	MIMAT0000765	hsa-miR-335-5p	10107 (miRanda-SCORE-v5) MIMAT0000765
1898	0.958139				1-PVALUE_OG-v5	1898		ENST00000376704	hsa-miR-335	gene-gene-pos	#NAME?	0.958139					FALSE	gene-gene-pos		#NAME?	10107	TRIM10	MIMAT0000765	hsa-miR-335-5p	10107 (1-PVALUE_OG-v5) MIMAT0000765
1900					validated miRTarBase	1900	18185580	10114	hsa-miR-335-5p	gene-gene-pos	#NAME?	0.75		18185580			FALSE	gene-gene-pos	18185580	#NAME?	10114	HIPK3	MIMAT0000765	hsa-miR-335-5p	10114 (validated miRTarBase) MIMAT0000765		0.75
1902					validated miRTarBase	1902	19536157	10114	hsa-miR-767-3p	gene-gene-pos	#NAME?	0.75		19536157			FALSE	gene-gene-pos	19536157	#NAME?	10114	HIPK3	MIMAT0003883	hsa-miR-767-3p	10114 (validated miRTarBase) MIMAT0003883		0.75
1903	0.998598				1-PVALUE_OG-v5	1903		ENST00000240123	hsa-miR-939	gene-gene-pos	#NAME?	0.998598					FALSE	gene-gene-pos		#NAME?	10174	SORBS3	MIMAT0004982	hsa-miR-939-5p	10174 (1-PVALUE_OG-v5) MIMAT0004982
1904					miRanda-SCORE-v5	1904		ENST00000240123	hsa-miR-939	gene-gene-pos	#NAME?	0.692612	0.692612				FALSE	gene-gene-pos		#NAME?	10174	SORBS3	MIMAT0004982	hsa-miR-939-5p	10174 (miRanda-SCORE-v5) MIMAT0004982
1905					miRanda-SCORE-v5	1905		ENST00000312358	hsa-miR-204	gene-gene-pos	#NAME?	0.642828	0.642828				FALSE	gene-gene-pos		#NAME?	10290	SPEG	MIMAT0000265	hsa-miR-204-5p	10290 (miRanda-SCORE-v5) MIMAT0000265
1906	0.995012				1-PVALUE_OG-v5	1906		ENST00000312358	hsa-miR-204	gene-gene-pos	#NAME?	0.995012					FALSE	gene-gene-pos		#NAME?	10290	SPEG	MIMAT0000265	hsa-miR-204-5p	10290 (1-PVALUE_OG-v5) MIMAT0000265
1907	0.983247				1-PVALUE_OG-v5	1907		ENST00000312358	hsa-miR-638	gene-gene-pos	#NAME?	0.983247					FALSE	gene-gene-pos		#NAME?	10290	SPEG	MIMAT0003308	hsa-miR-638	10290 (1-PVALUE_OG-v5) MIMAT0003308
1908					miRanda-SCORE-v5	1908		ENST00000312358	hsa-miR-638	gene-gene-pos	#NAME?	0.670724	0.670724				FALSE	gene-gene-pos		#NAME?	10290	SPEG	MIMAT0003308	hsa-miR-638	10290 (miRanda-SCORE-v5) MIMAT0003308
1909	0.998088				1-PVALUE_OG-v5	1909		ENST00000312358	hsa-miR-423-5p	gene-gene-pos	#NAME?	0.998088					FALSE	gene-gene-pos		#NAME?	10290	SPEG	MIMAT0004748	hsa-miR-423-5p	10290 (1-PVALUE_OG-v5) MIMAT0004748
1910					miRanda-SCORE-v5	1910		ENST00000312358	hsa-miR-423-5p	gene-gene-pos	#NAME?	0.672336	0.672336				FALSE	gene-gene-pos		#NAME?	10290	SPEG	MIMAT0004748	hsa-miR-423-5p	10290 (miRanda-SCORE-v5) MIMAT0004748
1911					miRanda-SCORE-v5	1911		ENST00000379661	hsa-miR-18b*	gene-gene-pos	#NAME?	0.62764	0.62764				FALSE	gene-gene-pos		#NAME?	10300	KATNB1	hsa-miR-18b*	hsa-miR-18b*	10300 (miRanda-SCORE-v5) hsa-miR-18b*
1912	0.960337				1-PVALUE_OG-v5	1912		ENST00000379661	hsa-miR-18b*	gene-gene-pos	#NAME?	0.960337					FALSE	gene-gene-pos		#NAME?	10300	KATNB1	hsa-miR-18b*	hsa-miR-18b*	10300 (1-PVALUE_OG-v5) hsa-miR-18b*
1913					miRanda-SCORE-v5	1913		ENST00000315050	hsa-miR-18b*	gene-gene-pos	#NAME?	0.64812	0.64812				FALSE	gene-gene-pos		#NAME?	10318	TNIP1	hsa-miR-18b*	hsa-miR-18b*	10318 (miRanda-SCORE-v5) hsa-miR-18b*
1914	0.975148				1-PVALUE_OG-v5	1914		ENST00000315050	hsa-miR-18b*	gene-gene-pos	#NAME?	0.975148					FALSE	gene-gene-pos		#NAME?	10318	TNIP1	hsa-miR-18b*	hsa-miR-18b*	10318 (1-PVALUE_OG-v5) hsa-miR-18b*
1915	0.995093				1-PVALUE_OG-v5	1915		ENST00000376692	hsa-miR-638	gene-gene-pos	#NAME?	0.995093					FALSE	gene-gene-pos		#NAME?	10459	MAD2L2	MIMAT0003308	hsa-miR-638	10459 (1-PVALUE_OG-v5) MIMAT0003308
1916					miRanda-SCORE-v5	1916		ENST00000376692	hsa-miR-638	gene-gene-pos	#NAME?	0.63658	0.63658				FALSE	gene-gene-pos		#NAME?	10459	MAD2L2	MIMAT0003308	hsa-miR-638	10459 (miRanda-SCORE-v5) MIMAT0003308
1917	0.993008				1-PVALUE_OG-v5	1917		ENST00000270538	hsa-miR-550	gene-gene-pos	#NAME?	0.993008					FALSE	gene-gene-pos		#NAME?	10469	TIMM44	MIMAT0004800	hsa-miR-550a-5p	10469 (1-PVALUE_OG-v5) MIMAT0004800
1918					miRanda-SCORE-v5	1918		ENST00000270538	hsa-miR-550	gene-gene-pos	#NAME?	0.654892	0.654892				FALSE	gene-gene-pos		#NAME?	10469	TIMM44	MIMAT0004800	hsa-miR-550a-5p	10469 (miRanda-SCORE-v5) MIMAT0004800
1919	0.980436				1-PVALUE_OG-v5	1919		ENST00000371227	hsa-miR-146a*	gene-gene-pos	#NAME?	0.980436					FALSE	gene-gene-pos		#NAME?	10580	SORBS1	hsa-miR-146a*	hsa-miR-146a*	10580 (1-PVALUE_OG-v5) hsa-miR-146a*
1920					miRanda-SCORE-v5	1920		ENST00000371227	hsa-miR-146a*	gene-gene-pos	#NAME?	0.694632	0.694632				FALSE	gene-gene-pos		#NAME?	10580	SORBS1	hsa-miR-146a*	hsa-miR-146a*	10580 (miRanda-SCORE-v5) hsa-miR-146a*
1921	0.958005				1-PVALUE_OG-v5	1921		ENST00000317296	hsa-miR-423-5p	gene-gene-pos	#NAME?	0.958005					FALSE	gene-gene-pos		#NAME?	10734	STAG3	MIMAT0004748	hsa-miR-423-5p	10734 (1-PVALUE_OG-v5) MIMAT0004748
1922					miRanda-SCORE-v5	1922		ENST00000317296	hsa-miR-423-5p	gene-gene-pos	#NAME?	0.681764	0.681764				FALSE	gene-gene-pos		#NAME?	10734	STAG3	MIMAT0004748	hsa-miR-423-5p	10734 (miRanda-SCORE-v5) MIMAT0004748
1923					miRanda-SCORE-v5	1923		ENST00000345425	hsa-miR-939	gene-gene-pos	#NAME?	0.670516	0.670516				FALSE	gene-gene-pos		#NAME?	10755	GIPC1	MIMAT0004982	hsa-miR-939-5p	10755 (miRanda-SCORE-v5) MIMAT0004982
1924	0.993287				1-PVALUE_OG-v5	1924		ENST00000345425	hsa-miR-939	gene-gene-pos	#NAME?	0.993287					FALSE	gene-gene-pos		#NAME?	10755	GIPC1	MIMAT0004982	hsa-miR-939-5p	10755 (1-PVALUE_OG-v5) MIMAT0004982
1925					validated miRTarBase	1925	18185580	1080	hsa-miR-335-5p	gene-gene-pos	#NAME?	0.75		18185580			FALSE	gene-gene-pos	18185580	#NAME?	1080	CFTR	MIMAT0000765	hsa-miR-335-5p	1080 (validated miRTarBase) MIMAT0000765		0.75
1926					miRanda-SCORE-v5	1926		ENST00000306026	hsa-miR-550	gene-gene-pos	#NAME?	0.647112	0.647112				FALSE	gene-gene-pos		#NAME?	10869	USP19	MIMAT0004800	hsa-miR-550a-5p	10869 (miRanda-SCORE-v5) MIMAT0004800
1927	0.952628				1-PVALUE_OG-v5	1927		ENST00000306026	hsa-miR-550	gene-gene-pos	#NAME?	0.952628					FALSE	gene-gene-pos		#NAME?	10869	USP19	MIMAT0004800	hsa-miR-550a-5p	10869 (1-PVALUE_OG-v5) MIMAT0004800
1928	0.992426				1-PVALUE_OG-v5	1928		ENST00000236051	hsa-miR-638	gene-gene-pos	#NAME?	0.992426					FALSE	gene-gene-pos		#NAME?	10969	EBNA1BP2	MIMAT0003308	hsa-miR-638	10969 (1-PVALUE_OG-v5) MIMAT0003308
1929					miRanda-SCORE-v5	1929		ENST00000236051	hsa-miR-638	gene-gene-pos	#NAME?	0.650032	0.650032				FALSE	gene-gene-pos		#NAME?	10969	EBNA1BP2	MIMAT0003308	hsa-miR-638	10969 (miRanda-SCORE-v5) MIMAT0003308
1930					miRanda-SCORE-v5	1930		ENST00000254636	hsa-miR-638	gene-gene-pos	#NAME?	0.616964	0.616964				FALSE	gene-gene-pos		#NAME?	10989	IMMT	MIMAT0003308	hsa-miR-638	10989 (miRanda-SCORE-v5) MIMAT0003308
1931	0.963195				1-PVALUE_OG-v5	1931		ENST00000254636	hsa-miR-638	gene-gene-pos	#NAME?	0.963195					FALSE	gene-gene-pos		#NAME?	10989	IMMT	MIMAT0003308	hsa-miR-638	10989 (1-PVALUE_OG-v5) MIMAT0003308
1932	0.986723				1-PVALUE_OG-v5	1932		ENST00000254636	hsa-miR-767-3p	gene-gene-pos	#NAME?	0.986723					FALSE	gene-gene-pos		#NAME?	10989	IMMT	MIMAT0003883	hsa-miR-767-3p	10989 (1-PVALUE_OG-v5) MIMAT0003883
1933					miRanda-SCORE-v5	1933		ENST00000254636	hsa-miR-767-3p	gene-gene-pos	#NAME?	0.663044	0.663044				FALSE	gene-gene-pos		#NAME?	10989	IMMT	MIMAT0003883	hsa-miR-767-3p	10989 (miRanda-SCORE-v5) MIMAT0003883
1934					miRanda-SCORE-v5	1934		ENST00000372224	hsa-miR-423-5p	gene-gene-pos	#NAME?	0.67282	0.67282				FALSE	gene-gene-pos		#NAME?	11004	KIF2C	MIMAT0004748	hsa-miR-423-5p	11004 (miRanda-SCORE-v5) MIMAT0004748
1935	0.998697				1-PVALUE_OG-v5	1935		ENST00000372224	hsa-miR-423-5p	gene-gene-pos	#NAME?	0.998697					FALSE	gene-gene-pos		#NAME?	11004	KIF2C	MIMAT0004748	hsa-miR-423-5p	11004 (1-PVALUE_OG-v5) MIMAT0004748
1936					validated miRTarBase	1936	22291592	11011	hsa-miR-204-5p	gene-gene-pos	#NAME?	0.75		22291592			FALSE	gene-gene-pos	22291592	#NAME?	11011	TLK2	MIMAT0000265	hsa-miR-204-5p	11011 (validated miRTarBase) MIMAT0000265		0.75
1937					validated miRTarBase	1937	18185580	1103	hsa-miR-335-5p	gene-gene-pos	#NAME?	0.75		18185580			FALSE	gene-gene-pos	18185580	#NAME?	1103	CHAT	MIMAT0000765	hsa-miR-335-5p	1103 (validated miRTarBase) MIMAT0000765		0.75
1938	0.988083				1-PVALUE_OG-v5	1938		ENST00000311181	hsa-miR-335	gene-gene-pos	#NAME?	0.988083					FALSE	gene-gene-pos		#NAME?	11041	B4GAT1	MIMAT0000765	hsa-miR-335-5p	11041 (1-PVALUE_OG-v5) MIMAT0000765
1939					miRanda-SCORE-v5	1939		ENST00000311181	hsa-miR-335	gene-gene-pos	#NAME?	0.697544	0.697544				FALSE	gene-gene-pos		#NAME?	11041	B4GAT1	MIMAT0000765	hsa-miR-335-5p	11041 (miRanda-SCORE-v5) MIMAT0000765
1940	0.976966				1-PVALUE_OG-v5	1940		ENST00000311181	hsa-miR-423-5p	gene-gene-pos	#NAME?	0.976966					FALSE	gene-gene-pos		#NAME?	11041	B4GAT1	MIMAT0004748	hsa-miR-423-5p	11041 (1-PVALUE_OG-v5) MIMAT0004748
1941					miRanda-SCORE-v5	1941		ENST00000311181	hsa-miR-423-5p	gene-gene-pos	#NAME?	0.710076	0.710076				FALSE	gene-gene-pos		#NAME?	11041	B4GAT1	MIMAT0004748	hsa-miR-423-5p	11041 (miRanda-SCORE-v5) MIMAT0004748
1942	0.974516				1-PVALUE_OG-v5	1942		ENST00000290291	hsa-miR-939	gene-gene-pos	#NAME?	0.974516					FALSE	gene-gene-pos		#NAME?	11054	OGFR	MIMAT0004982	hsa-miR-939-5p	11054 (1-PVALUE_OG-v5) MIMAT0004982
1943					miRanda-SCORE-v5	1943		ENST00000290291	hsa-miR-939	gene-gene-pos	#NAME?	0.730184	0.730184				FALSE	gene-gene-pos		#NAME?	11054	OGFR	MIMAT0004982	hsa-miR-939-5p	11054 (miRanda-SCORE-v5) MIMAT0004982
1944	0.998986				1-PVALUE_OG-v5	1944		ENST00000232508	hsa-miR-423-5p	gene-gene-pos	#NAME?	0.998986					FALSE	gene-gene-pos		#NAME?	11068	CYB561D2	MIMAT0004748	hsa-miR-423-5p	11068 (1-PVALUE_OG-v5) MIMAT0004748
1945					miRanda-SCORE-v5	1945		ENST00000232508	hsa-miR-423-5p	gene-gene-pos	#NAME?	0.714992	0.714992				FALSE	gene-gene-pos		#NAME?	11068	CYB561D2	MIMAT0004748	hsa-miR-423-5p	11068 (miRanda-SCORE-v5) MIMAT0004748
1946					miRanda-SCORE-v5	1946		ENST00000232508	hsa-miR-550	gene-gene-pos	#NAME?	0.72404	0.72404				FALSE	gene-gene-pos		#NAME?	11068	CYB561D2	MIMAT0004800	hsa-miR-550a-5p	11068 (miRanda-SCORE-v5) MIMAT0004800
1947	0.999982				1-PVALUE_OG-v5	1947		ENST00000232508	hsa-miR-550	gene-gene-pos	#NAME?	0.999982					FALSE	gene-gene-pos		#NAME?	11068	CYB561D2	MIMAT0004800	hsa-miR-550a-5p	11068 (1-PVALUE_OG-v5) MIMAT0004800
1948					validated miRTarBase	1948	18185580	11131	hsa-miR-335-5p	gene-gene-pos	#NAME?	0.75		18185580			FALSE	gene-gene-pos	18185580	#NAME?	11131	CAPN11	MIMAT0000765	hsa-miR-335-5p	11131 (validated miRTarBase) MIMAT0000765		0.75
1949					miRanda-SCORE-v5	1949		ENST00000300005	hsa-miR-149*	gene-gene-pos	#NAME?	0.730108	0.730108				FALSE	gene-gene-pos		#NAME?	112479	ERI2	hsa-miR-149*	hsa-miR-149*	112479 (miRanda-SCORE-v5) hsa-miR-149*
1950	0.963488				1-PVALUE_OG-v5	1950		ENST00000300005	hsa-miR-149*	gene-gene-pos	#NAME?	0.963488					FALSE	gene-gene-pos		#NAME?	112479	ERI2	hsa-miR-149*	hsa-miR-149*	112479 (1-PVALUE_OG-v5) hsa-miR-149*
1951	0.969935				1-PVALUE_OG-v5	1951		ENST00000317393	hsa-miR-204	gene-gene-pos	#NAME?	0.969935					FALSE	gene-gene-pos		#NAME?	11255	HRH3	MIMAT0000265	hsa-miR-204-5p	11255 (1-PVALUE_OG-v5) MIMAT0000265
1952					miRanda-SCORE-v5	1952		ENST00000317393	hsa-miR-204	gene-gene-pos	#NAME?	0.692084	0.692084				FALSE	gene-gene-pos		#NAME?	11255	HRH3	MIMAT0000265	hsa-miR-204-5p	11255 (miRanda-SCORE-v5) MIMAT0000265
1953	0.956144				1-PVALUE_OG-v5	1953		ENST00000288071	hsa-miR-18b*	gene-gene-pos	#NAME?	0.956144					FALSE	gene-gene-pos		#NAME?	11269	DDX19B	hsa-miR-18b*	hsa-miR-18b*	11269 (1-PVALUE_OG-v5) hsa-miR-18b*
1954					miRanda-SCORE-v5	1954		ENST00000288071	hsa-miR-18b*	gene-gene-pos	#NAME?	0.623092	0.623092				FALSE	gene-gene-pos		#NAME?	11269	DDX19B	hsa-miR-18b*	hsa-miR-18b*	11269 (miRanda-SCORE-v5) hsa-miR-18b*
1955					validated miRTarBase	1955	18185580	113026	hsa-miR-335-5p	gene-gene-pos	#NAME?	0.75		18185580			FALSE	gene-gene-pos	18185580	#NAME?	113026	PLCD3	MIMAT0000765	hsa-miR-335-5p	113026 (validated miRTarBase) MIMAT0000765		0.75
1956					validated miRTarBase	1956	23592263	114787	hsa-miR-423-5p	gene-gene-pos	#NAME?	0.75		23592263			FALSE	gene-gene-pos	23592263	#NAME?	114787	GPRIN1	MIMAT0004748	hsa-miR-423-5p	114787 (validated miRTarBase) MIMAT0004748		0.75
1957					validated miRTarBase	1957	18185580	114804	hsa-miR-335-5p	gene-gene-pos	#NAME?	0.75		18185580			FALSE	gene-gene-pos	18185580	#NAME?	114804	RNF157	MIMAT0000765	hsa-miR-335-5p	114804 (validated miRTarBase) MIMAT0000765		0.75
1958					validated miRTarBase	1958	23592263	117246	hsa-miR-939-5p	gene-gene-pos	#NAME?	0.75		23592263			FALSE	gene-gene-pos	23592263	#NAME?	117246	FTSJ3	MIMAT0004982	hsa-miR-939-5p	117246 (validated miRTarBase) MIMAT0004982		0.75
1959					validated miRTarBase	1959	23592263	1186	hsa-miR-423-5p	gene-gene-pos	#NAME?	0.75		23592263			FALSE	gene-gene-pos	23592263	#NAME?	1186	CLCN7	MIMAT0004748	hsa-miR-423-5p	1186 (validated miRTarBase) MIMAT0004748		0.75
1960					validated miRTarBase	1960	18185580	119548	hsa-miR-335-5p	gene-gene-pos	#NAME?	0.75		18185580			FALSE	gene-gene-pos	18185580	#NAME?	119548	PNLIPRP3	MIMAT0000765	hsa-miR-335-5p	119548 (validated miRTarBase) MIMAT0000765		0.75
1961	0.993097				1-PVALUE_OG-v5	1961		ENST00000310418	hsa-miR-423-5p	gene-gene-pos	#NAME?	0.993097					FALSE	gene-gene-pos		#NAME?	1212	CLTB	MIMAT0004748	hsa-miR-423-5p	1212 (1-PVALUE_OG-v5) MIMAT0004748
1962					miRanda-SCORE-v5	1962		ENST00000310418	hsa-miR-423-5p	gene-gene-pos	#NAME?	0.685048	0.685048				FALSE	gene-gene-pos		#NAME?	1212	CLTB	MIMAT0004748	hsa-miR-423-5p	1212 (miRanda-SCORE-v5) MIMAT0004748
1963					miRanda-SCORE-v5	1963		ENST00000310418	hsa-miR-149*	gene-gene-pos	#NAME?	0.692144	0.692144				FALSE	gene-gene-pos		#NAME?	1212	CLTB	hsa-miR-149*	hsa-miR-149*	1212 (miRanda-SCORE-v5) hsa-miR-149*
1964	0.996301				1-PVALUE_OG-v5	1964		ENST00000310418	hsa-miR-149*	gene-gene-pos	#NAME?	0.996301					FALSE	gene-gene-pos		#NAME?	1212	CLTB	hsa-miR-149*	hsa-miR-149*	1212 (1-PVALUE_OG-v5) hsa-miR-149*
1965					miRanda-SCORE-v5	1965		ENST00000343075	hsa-miR-146a*	gene-gene-pos	#NAME?	0.632076	0.632076				FALSE	gene-gene-pos		#NAME?	121642	ALKBH2	hsa-miR-146a*	hsa-miR-146a*	121642 (miRanda-SCORE-v5) hsa-miR-146a*
1966	0.991467				1-PVALUE_OG-v5	1966		ENST00000343075	hsa-miR-146a*	gene-gene-pos	#NAME?	0.991467					FALSE	gene-gene-pos		#NAME?	121642	ALKBH2	hsa-miR-146a*	hsa-miR-146a*	121642 (1-PVALUE_OG-v5) hsa-miR-146a*
1967					validated miRTarBase	1967	18185580	126410	hsa-miR-335-5p	gene-gene-pos	#NAME?	0.75		18185580			FALSE	gene-gene-pos	18185580	#NAME?	126410	CYP4F22	MIMAT0000765	hsa-miR-335-5p	126410 (validated miRTarBase) MIMAT0000765		0.75
1968					validated miRTarBase	1968	20371350	1278	hsa-miR-939-5p	gene-gene-pos	#NAME?	0.75		20371350			FALSE	gene-gene-pos	20371350	#NAME?	1278	COL1A2	MIMAT0004982	hsa-miR-939-5p	1278 (validated miRTarBase) MIMAT0004982		0.75
1969					validated miRTarBase	1969	18185580	1299	hsa-miR-335-5p	gene-gene-pos	#NAME?	0.75		18185580			FALSE	gene-gene-pos	18185580	#NAME?	1299	COL9A3	MIMAT0000765	hsa-miR-335-5p	1299 (validated miRTarBase) MIMAT0000765		0.75
1970	0.994298				1-PVALUE_OG-v5	1970		ENST00000343916	hsa-miR-423-5p	gene-gene-pos	#NAME?	0.994298					FALSE	gene-gene-pos		#NAME?	1299	COL9A3	MIMAT0004748	hsa-miR-423-5p	1299 (1-PVALUE_OG-v5) MIMAT0004748
1971					miRanda-SCORE-v5	1971		ENST00000343916	hsa-miR-423-5p	gene-gene-pos	#NAME?	0.709472	0.709472				FALSE	gene-gene-pos		#NAME?	1299	COL9A3	MIMAT0004748	hsa-miR-423-5p	1299 (miRanda-SCORE-v5) MIMAT0004748
1972					miRanda-SCORE-v5	1972		ENST00000305690	hsa-miR-423-5p	gene-gene-pos	#NAME?	0.681056	0.681056				FALSE	gene-gene-pos		#NAME?	132158	GLYCTK	MIMAT0004748	hsa-miR-423-5p	132158 (miRanda-SCORE-v5) MIMAT0004748
1973	0.957376				1-PVALUE_OG-v5	1973		ENST00000305690	hsa-miR-423-5p	gene-gene-pos	#NAME?	0.957376					FALSE	gene-gene-pos		#NAME?	132158	GLYCTK	MIMAT0004748	hsa-miR-423-5p	132158 (1-PVALUE_OG-v5) MIMAT0004748
1974					validated miRTarBase	1974	23446348	134353	hsa-miR-550a-5p	gene-gene-pos	#NAME?	0.75		23446348			FALSE	gene-gene-pos	23446348	#NAME?	134353	LSM11	MIMAT0004800	hsa-miR-550a-5p	134353 (validated miRTarBase) MIMAT0004800		0.75
1975					validated miRTarBase	1975	23446348	1368	hsa-miR-550a-5p	gene-gene-pos	#NAME?	0.75		23446348			FALSE	gene-gene-pos	23446348	#NAME?	1368	CPM	MIMAT0004800	hsa-miR-550a-5p	1368 (validated miRTarBase) MIMAT0004800		0.75
1976					validated miRTarBase	1976	18185580	140469	hsa-miR-335-5p	gene-gene-pos	#NAME?	0.75		18185580			FALSE	gene-gene-pos	18185580	#NAME?	140469	MYO3B	MIMAT0000765	hsa-miR-335-5p	140469 (validated miRTarBase) MIMAT0000765		0.75
1977					miRanda-SCORE-v5	1977		ENST00000255152	hsa-miR-204	gene-gene-pos	#NAME?	0.69094	0.69094				FALSE	gene-gene-pos		#NAME?	140831	ZSWIM3	MIMAT0000265	hsa-miR-204-5p	140831 (miRanda-SCORE-v5) MIMAT0000265
1978	0.969214				1-PVALUE_OG-v5	1978		ENST00000255152	hsa-miR-204	gene-gene-pos	#NAME?	0.969214					FALSE	gene-gene-pos		#NAME?	140831	ZSWIM3	MIMAT0000265	hsa-miR-204-5p	140831 (1-PVALUE_OG-v5) MIMAT0000265
1979	0.992192				1-PVALUE_OG-v5	1979		ENST00000255152	hsa-miR-335	gene-gene-pos	#NAME?	0.992192					FALSE	gene-gene-pos		#NAME?	140831	ZSWIM3	MIMAT0000765	hsa-miR-335-5p	140831 (1-PVALUE_OG-v5) MIMAT0000765
1980					miRanda-SCORE-v5	1980		ENST00000255152	hsa-miR-335	gene-gene-pos	#NAME?	0.623172	0.623172				FALSE	gene-gene-pos		#NAME?	140831	ZSWIM3	MIMAT0000765	hsa-miR-335-5p	140831 (miRanda-SCORE-v5) MIMAT0000765
1981					validated miRTarBase	1981	23824327	143570	hsa-miR-204-5p	gene-gene-pos	#NAME?	0.75		23824327			FALSE	gene-gene-pos	23824327	#NAME?	143570	XRRA1	MIMAT0000265	hsa-miR-204-5p	143570 (validated miRTarBase) MIMAT0000265		0.75
1982					validated miRTarBase	1982	18185580	143570	hsa-miR-335-5p	gene-gene-pos	#NAME?	0.75		18185580			FALSE	gene-gene-pos	18185580	#NAME?	143570	XRRA1	MIMAT0000765	hsa-miR-335-5p	143570 (validated miRTarBase) MIMAT0000765		0.75
1983	0.99567				1-PVALUE_OG-v5	1983		ENST00000340360	hsa-miR-939	gene-gene-pos	#NAME?	0.99567					FALSE	gene-gene-pos		#NAME?	143570	XRRA1	MIMAT0004982	hsa-miR-939-5p	143570 (1-PVALUE_OG-v5) MIMAT0004982
1984					miRanda-SCORE-v5	1984		ENST00000340360	hsa-miR-939	gene-gene-pos	#NAME?	0.720304	0.720304				FALSE	gene-gene-pos		#NAME?	143570	XRRA1	MIMAT0004982	hsa-miR-939-5p	143570 (miRanda-SCORE-v5) MIMAT0004982
1985	0.995831				1-PVALUE_OG-v5	1985		ENST00000381509	hsa-miR-550	gene-gene-pos	#NAME?	0.995831					FALSE	gene-gene-pos		#NAME?	1438	CSF2RA	MIMAT0004800	hsa-miR-550a-5p	1438 (1-PVALUE_OG-v5) MIMAT0004800
1986					miRanda-SCORE-v5	1986		ENST00000381529	hsa-miR-550	gene-gene-pos	#NAME?	0.663124	0.663124				FALSE	gene-gene-pos		#NAME?	1438	CSF2RA	MIMAT0004800	hsa-miR-550a-5p	1438 (miRanda-SCORE-v5) MIMAT0004800
1987	0.98066				1-PVALUE_OG-v5	1987		ENST00000381500	hsa-miR-18b*	gene-gene-pos	#NAME?	0.98066					FALSE	gene-gene-pos		#NAME?	1438	CSF2RA	hsa-miR-18b*	hsa-miR-18b*	1438 (1-PVALUE_OG-v5) hsa-miR-18b*
1988					miRanda-SCORE-v5	1988		ENST00000381500	hsa-miR-18b*	gene-gene-pos	#NAME?	0.65948	0.65948				FALSE	gene-gene-pos		#NAME?	1438	CSF2RA	hsa-miR-18b*	hsa-miR-18b*	1438 (miRanda-SCORE-v5) hsa-miR-18b*
1989	0.9935				1-PVALUE_OG-v5	1989		ENST00000379504	hsa-miR-550	gene-gene-pos	#NAME?	0.9935					FALSE	gene-gene-pos		#NAME?	146691	TOM1L2	MIMAT0004800	hsa-miR-550a-5p	146691 (1-PVALUE_OG-v5) MIMAT0004800
1990					miRanda-SCORE-v5	1990		ENST00000379504	hsa-miR-550	gene-gene-pos	#NAME?	0.636576	0.636576				FALSE	gene-gene-pos		#NAME?	146691	TOM1L2	MIMAT0004800	hsa-miR-550a-5p	146691 (miRanda-SCORE-v5) MIMAT0004800
1991	0.994375				1-PVALUE_OG-v5	1991		ENST00000331531	hsa-miR-638	gene-gene-pos	#NAME?	0.994375					FALSE	gene-gene-pos		#NAME?	1468	SLC25A10	MIMAT0003308	hsa-miR-638	1468 (1-PVALUE_OG-v5) MIMAT0003308
1992					miRanda-SCORE-v5	1992		ENST00000331531	hsa-miR-638	gene-gene-pos	#NAME?	0.62038	0.62038				FALSE	gene-gene-pos		#NAME?	1468	SLC25A10	MIMAT0003308	hsa-miR-638	1468 (miRanda-SCORE-v5) MIMAT0003308
1993					miRanda-SCORE-v5	1993		ENST00000306675	hsa-miR-423-5p	gene-gene-pos	#NAME?	0.658852	0.658852				FALSE	gene-gene-pos		#NAME?	147	ADRA1B	MIMAT0004748	hsa-miR-423-5p	147 (miRanda-SCORE-v5) MIMAT0004748
1994	0.999628				1-PVALUE_OG-v5	1994		ENST00000306675	hsa-miR-423-5p	gene-gene-pos	#NAME?	0.999628					FALSE	gene-gene-pos		#NAME?	147	ADRA1B	MIMAT0004748	hsa-miR-423-5p	147 (1-PVALUE_OG-v5) MIMAT0004748
1995					validated miRTarBase	1995	18185580	1500	hsa-miR-335-5p	gene-gene-pos	#NAME?	0.75		18185580			FALSE	gene-gene-pos	18185580	#NAME?	1500	CTNND1	MIMAT0000765	hsa-miR-335-5p	1500 (validated miRTarBase) MIMAT0000765		0.75
1996					validated miRTarBase	1996	18185580	154661	hsa-miR-335-5p	gene-gene-pos	#NAME?	0.75		18185580			FALSE	gene-gene-pos	18185580	#NAME?	154661	RUNDC3B	MIMAT0000765	hsa-miR-335-5p	154661 (validated miRTarBase) MIMAT0000765		0.75
1997					miRanda-SCORE-v5	1997		ENST00000297873	hsa-miR-423-5p	gene-gene-pos	#NAME?	0.710464	0.710464				FALSE	gene-gene-pos		#NAME?	155368	METTL27	MIMAT0004748	hsa-miR-423-5p	155368 (miRanda-SCORE-v5) MIMAT0004748
1998	0.977158				1-PVALUE_OG-v5	1998		ENST00000297873	hsa-miR-423-5p	gene-gene-pos	#NAME?	0.977158					FALSE	gene-gene-pos		#NAME?	155368	METTL27	MIMAT0004748	hsa-miR-423-5p	155368 (1-PVALUE_OG-v5) MIMAT0004748
1999	0.986483				1-PVALUE_OG-v5	1999		ENST00000297459	hsa-miR-335	gene-gene-pos	#NAME?	0.986483					FALSE	gene-gene-pos		#NAME?	157753	TMEM74	MIMAT0000765	hsa-miR-335-5p	157753 (1-PVALUE_OG-v5) MIMAT0000765
2000					miRanda-SCORE-v5	2000		ENST00000297459	hsa-miR-335	gene-gene-pos	#NAME?	0.62594	0.62594				FALSE	gene-gene-pos		#NAME?	157753	TMEM74	MIMAT0000765	hsa-miR-335-5p	157753 (miRanda-SCORE-v5) MIMAT0000765
2001					validated miRTarBase	2001	18185580	1581	hsa-miR-335-5p	gene-gene-pos	#NAME?	0.75		18185580			FALSE	gene-gene-pos	18185580	#NAME?	1581	CYP7A1	MIMAT0000765	hsa-miR-335-5p	1581 (validated miRTarBase) MIMAT0000765		0.75
2002					validated miRTarBase	2002	22012620	1656	hsa-miR-335-5p	gene-gene-pos	#NAME?	0.75		22012620			FALSE	gene-gene-pos	22012620	#NAME?	1656	DDX6	MIMAT0000765	hsa-miR-335-5p	1656 (validated miRTarBase) MIMAT0000765		0.75
2003					miRanda-SCORE-v5	2003		ENST00000317005	hsa-miR-550	gene-gene-pos	#NAME?	0.697004	0.697004				FALSE	gene-gene-pos		#NAME?	166815	TIGD2	MIMAT0004800	hsa-miR-550a-5p	166815 (miRanda-SCORE-v5) MIMAT0004800
2004	0.985331				1-PVALUE_OG-v5	2004		ENST00000317005	hsa-miR-550	gene-gene-pos	#NAME?	0.985331					FALSE	gene-gene-pos		#NAME?	166815	TIGD2	MIMAT0004800	hsa-miR-550a-5p	166815 (1-PVALUE_OG-v5) MIMAT0004800
2005	0.996172				1-PVALUE_OG-v5	2005		ENST00000373960	hsa-miR-638	gene-gene-pos	#NAME?	0.996172					FALSE	gene-gene-pos		#NAME?	1674	DES	MIMAT0003308	hsa-miR-638	1674 (1-PVALUE_OG-v5) MIMAT0003308
2006					miRanda-SCORE-v5	2006		ENST00000373960	hsa-miR-638	gene-gene-pos	#NAME?	0.62818	0.62818				FALSE	gene-gene-pos		#NAME?	1674	DES	MIMAT0003308	hsa-miR-638	1674 (miRanda-SCORE-v5) MIMAT0003308
2007	0.999597				1-PVALUE_OG-v5	2007		ENST00000373960	hsa-miR-550	gene-gene-pos	#NAME?	0.999597					FALSE	gene-gene-pos		#NAME?	1674	DES	MIMAT0004800	hsa-miR-550a-5p	1674 (1-PVALUE_OG-v5) MIMAT0004800
2008					miRanda-SCORE-v5	2008		ENST00000373960	hsa-miR-550	gene-gene-pos	#NAME?	0.687436	0.687436				FALSE	gene-gene-pos		#NAME?	1674	DES	MIMAT0004800	hsa-miR-550a-5p	1674 (miRanda-SCORE-v5) MIMAT0004800
2009	0.996178				1-PVALUE_OG-v5	2009		ENST00000373960	hsa-miR-939	gene-gene-pos	#NAME?	0.996178					FALSE	gene-gene-pos		#NAME?	1674	DES	MIMAT0004982	hsa-miR-939-5p	1674 (1-PVALUE_OG-v5) MIMAT0004982
2010					miRanda-SCORE-v5	2010		ENST00000373960	hsa-miR-939	gene-gene-pos	#NAME?	0.663808	0.663808				FALSE	gene-gene-pos		#NAME?	1674	DES	MIMAT0004982	hsa-miR-939-5p	1674 (miRanda-SCORE-v5) MIMAT0004982
2011	0.995469				1-PVALUE_OG-v5	2011		ENST00000373960	hsa-miR-149*	gene-gene-pos	#NAME?	0.995469					FALSE	gene-gene-pos		#NAME?	1674	DES	hsa-miR-149*	hsa-miR-149*	1674 (1-PVALUE_OG-v5) hsa-miR-149*
2012					miRanda-SCORE-v5	2012		ENST00000373960	hsa-miR-149*	gene-gene-pos	#NAME?	0.7316	0.7316				FALSE	gene-gene-pos		#NAME?	1674	DES	hsa-miR-149*	hsa-miR-149*	1674 (miRanda-SCORE-v5) hsa-miR-149*
2013					validated miRTarBase	2013	18185580	167691	hsa-miR-335-5p	gene-gene-pos	#NAME?	0.75		18185580			FALSE	gene-gene-pos	18185580	#NAME?	167691	LCA5	MIMAT0000765	hsa-miR-335-5p	167691 (validated miRTarBase) MIMAT0000765		0.75
2014					miRanda-SCORE-v5	2014		ENST00000210060	hsa-miR-638	gene-gene-pos	#NAME?	0.658996	0.658996				FALSE	gene-gene-pos		#NAME?	1725	DHPS	MIMAT0003308	hsa-miR-638	1725 (miRanda-SCORE-v5) MIMAT0003308
2015	0.991217				1-PVALUE_OG-v5	2015		ENST00000210060	hsa-miR-638	gene-gene-pos	#NAME?	0.991217					FALSE	gene-gene-pos		#NAME?	1725	DHPS	MIMAT0003308	hsa-miR-638	1725 (1-PVALUE_OG-v5) MIMAT0003308
2016	0.998923				1-PVALUE_OG-v5	2016		ENST00000210060	hsa-miR-423-5p	gene-gene-pos	#NAME?	0.998923					FALSE	gene-gene-pos		#NAME?	1725	DHPS	MIMAT0004748	hsa-miR-423-5p	1725 (1-PVALUE_OG-v5) MIMAT0004748
2017					miRanda-SCORE-v5	2017		ENST00000210060	hsa-miR-423-5p	gene-gene-pos	#NAME?	0.683312	0.683312				FALSE	gene-gene-pos		#NAME?	1725	DHPS	MIMAT0004748	hsa-miR-423-5p	1725 (miRanda-SCORE-v5) MIMAT0004748
2018	0.984779				1-PVALUE_OG-v5	2018		ENST00000210060	hsa-miR-149*	gene-gene-pos	#NAME?	0.984779					FALSE	gene-gene-pos		#NAME?	1725	DHPS	hsa-miR-149*	hsa-miR-149*	1725 (1-PVALUE_OG-v5) hsa-miR-149*
2019					miRanda-SCORE-v5	2019		ENST00000210060	hsa-miR-149*	gene-gene-pos	#NAME?	0.777292	0.777292				FALSE	gene-gene-pos		#NAME?	1725	DHPS	hsa-miR-149*	hsa-miR-149*	1725 (miRanda-SCORE-v5) hsa-miR-149*
2020					miRanda-SCORE-v5	2020		ENST00000270223	hsa-miR-423-5p	gene-gene-pos	#NAME?	0.682496	0.682496				FALSE	gene-gene-pos		#NAME?	1762	DMWD	MIMAT0004748	hsa-miR-423-5p	1762 (miRanda-SCORE-v5) MIMAT0004748
2021	0.958646				1-PVALUE_OG-v5	2021		ENST00000270223	hsa-miR-423-5p	gene-gene-pos	#NAME?	0.958646					FALSE	gene-gene-pos		#NAME?	1762	DMWD	MIMAT0004748	hsa-miR-423-5p	1762 (1-PVALUE_OG-v5) MIMAT0004748
2022					miRanda-SCORE-v5	2022		ENST00000309585	hsa-miR-335	gene-gene-pos	#NAME?	0.678948	0.678948				FALSE	gene-gene-pos		#NAME?	1774	DNASE1L1	MIMAT0000765	hsa-miR-335-5p	1774 (miRanda-SCORE-v5) MIMAT0000765
2023	0.981585				1-PVALUE_OG-v5	2023		ENST00000309585	hsa-miR-335	gene-gene-pos	#NAME?	0.981585					FALSE	gene-gene-pos		#NAME?	1774	DNASE1L1	MIMAT0000765	hsa-miR-335-5p	1774 (1-PVALUE_OG-v5) MIMAT0000765
2024	0.990428				1-PVALUE_OG-v5	2024		ENST00000356654	hsa-miR-204	gene-gene-pos	#NAME?	0.990428					FALSE	gene-gene-pos		#NAME?	1822	ATN1	MIMAT0000265	hsa-miR-204-5p	1822 (1-PVALUE_OG-v5) MIMAT0000265
2025					miRanda-SCORE-v5	2025		ENST00000356654	hsa-miR-204	gene-gene-pos	#NAME?	0.640676	0.640676				FALSE	gene-gene-pos		#NAME?	1822	ATN1	MIMAT0000265	hsa-miR-204-5p	1822 (miRanda-SCORE-v5) MIMAT0000265
2026					miRanda-SCORE-v5	2026		ENST00000356654	hsa-miR-638	gene-gene-pos	#NAME?	0.78232	0.78232				FALSE	gene-gene-pos		#NAME?	1822	ATN1	MIMAT0003308	hsa-miR-638	1822 (miRanda-SCORE-v5) MIMAT0003308
2027	0.998377				1-PVALUE_OG-v5	2027		ENST00000356654	hsa-miR-638	gene-gene-pos	#NAME?	0.998377					FALSE	gene-gene-pos		#NAME?	1822	ATN1	MIMAT0003308	hsa-miR-638	1822 (1-PVALUE_OG-v5) MIMAT0003308
2028					validated miRTarBase	2028	23622248	1822	hsa-miR-423-5p	gene-gene-pos	#NAME?	0.75		23622248			FALSE	gene-gene-pos	23622248	#NAME?	1822	ATN1	MIMAT0004748	hsa-miR-423-5p	1822 (validated miRTarBase) MIMAT0004748		0.75
2029					miRanda-SCORE-v5	2029		ENST00000356654	hsa-miR-423-5p	gene-gene-pos	#NAME?	0.659272	0.659272				FALSE	gene-gene-pos		#NAME?	1822	ATN1	MIMAT0004748	hsa-miR-423-5p	1822 (miRanda-SCORE-v5) MIMAT0004748
2030	0.998841				1-PVALUE_OG-v5	2030		ENST00000356654	hsa-miR-423-5p	gene-gene-pos	#NAME?	0.998841					FALSE	gene-gene-pos		#NAME?	1822	ATN1	MIMAT0004748	hsa-miR-423-5p	1822 (1-PVALUE_OG-v5) MIMAT0004748
2031					miRanda-SCORE-v5	2031		ENST00000356654	hsa-miR-149*	gene-gene-pos	#NAME?	0.753452	0.753452				FALSE	gene-gene-pos		#NAME?	1822	ATN1	hsa-miR-149*	hsa-miR-149*	1822 (miRanda-SCORE-v5) hsa-miR-149*
2032	0.999933				1-PVALUE_OG-v5	2032		ENST00000356654	hsa-miR-149*	gene-gene-pos	#NAME?	0.999933					FALSE	gene-gene-pos		#NAME?	1822	ATN1	hsa-miR-149*	hsa-miR-149*	1822 (1-PVALUE_OG-v5) hsa-miR-149*
2033					validated miRTarBase	2033	18185580	1848	hsa-miR-335-5p	gene-gene-pos	#NAME?	0.75		18185580			FALSE	gene-gene-pos	18185580	#NAME?	1848	DUSP6	MIMAT0000765	hsa-miR-335-5p	1848 (validated miRTarBase) MIMAT0000765		0.75
2034	0.99207				1-PVALUE_OG-v5	2034		ENST00000279488	hsa-miR-18b*	gene-gene-pos	#NAME?	0.99207					FALSE	gene-gene-pos		#NAME?	1848	DUSP6	hsa-miR-18b*	hsa-miR-18b*	1848 (1-PVALUE_OG-v5) hsa-miR-18b*
2035					validated miRTarBase	2035	18185580	1879	hsa-miR-335-5p	gene-gene-pos	#NAME?	0.75		18185580			FALSE	gene-gene-pos	18185580	#NAME?	1879	EBF1	MIMAT0000765	hsa-miR-335-5p	1879 (validated miRTarBase) MIMAT0000765		0.75
2036					miRanda-SCORE-v5	2036		ENST00000380654	hsa-miR-939	gene-gene-pos	#NAME?	0.725076	0.725076				FALSE	gene-gene-pos		#NAME?	1879	EBF1	MIMAT0004982	hsa-miR-939-5p	1879 (miRanda-SCORE-v5) MIMAT0004982
2037	0.971785				1-PVALUE_OG-v5	2037		ENST00000380654	hsa-miR-939	gene-gene-pos	#NAME?	0.971785					FALSE	gene-gene-pos		#NAME?	1879	EBF1	MIMAT0004982	hsa-miR-939-5p	1879 (1-PVALUE_OG-v5) MIMAT0004982
2038					miRanda-SCORE-v5	2038		ENST00000380654	hsa-miR-146a*	gene-gene-pos	#NAME?	0.723152	0.723152				FALSE	gene-gene-pos		#NAME?	1879	EBF1	hsa-miR-146a*	hsa-miR-146a*	1879 (miRanda-SCORE-v5) hsa-miR-146a*
2039	0.990032				1-PVALUE_OG-v5	2039		ENST00000380654	hsa-miR-146a*	gene-gene-pos	#NAME?	0.990032					FALSE	gene-gene-pos		#NAME?	1879	EBF1	hsa-miR-146a*	hsa-miR-146a*	1879 (1-PVALUE_OG-v5) hsa-miR-146a*
2040					miRanda-SCORE-v5	2040		ENST00000380654	hsa-miR-149*	gene-gene-pos	#NAME?	0.717852	0.717852				FALSE	gene-gene-pos		#NAME?	1879	EBF1	hsa-miR-149*	hsa-miR-149*	1879 (miRanda-SCORE-v5) hsa-miR-149*
2041	0.954351				1-PVALUE_OG-v5	2041		ENST00000380654	hsa-miR-149*	gene-gene-pos	#NAME?	0.954351					FALSE	gene-gene-pos		#NAME?	1879	EBF1	hsa-miR-149*	hsa-miR-149*	1879 (1-PVALUE_OG-v5) hsa-miR-149*
2042					miRanda-SCORE-v5	2042		ENST00000293831	hsa-miR-335	gene-gene-pos	#NAME?	0.644952	0.644952				FALSE	gene-gene-pos		#NAME?	1973	EIF4A1	MIMAT0000765	hsa-miR-335-5p	1973 (miRanda-SCORE-v5) MIMAT0000765
2043	0.959643				1-PVALUE_OG-v5	2043		ENST00000293831	hsa-miR-335	gene-gene-pos	#NAME?	0.959643					FALSE	gene-gene-pos		#NAME?	1973	EIF4A1	MIMAT0000765	hsa-miR-335-5p	1973 (1-PVALUE_OG-v5) MIMAT0000765
2044	0.954908				1-PVALUE_OG-v5	2044		ENST00000293831	hsa-miR-550	gene-gene-pos	#NAME?	0.954908					FALSE	gene-gene-pos		#NAME?	1973	EIF4A1	MIMAT0004800	hsa-miR-550a-5p	1973 (1-PVALUE_OG-v5) MIMAT0004800
2045					miRanda-SCORE-v5	2045		ENST00000293831	hsa-miR-550	gene-gene-pos	#NAME?	0.649252	0.649252				FALSE	gene-gene-pos		#NAME?	1973	EIF4A1	MIMAT0004800	hsa-miR-550a-5p	1973 (miRanda-SCORE-v5) MIMAT0004800
2046					miRanda-SCORE-v5	2046		ENST00000336338	hsa-miR-204	gene-gene-pos	#NAME?	0.672248	0.672248				FALSE	gene-gene-pos		#NAME?	200162	SPAG17	MIMAT0000265	hsa-miR-204-5p	200162 (miRanda-SCORE-v5) MIMAT0000265
2047	0.995205				1-PVALUE_OG-v5	2047		ENST00000336338	hsa-miR-204	gene-gene-pos	#NAME?	0.995205					FALSE	gene-gene-pos		#NAME?	200162	SPAG17	MIMAT0000265	hsa-miR-204-5p	200162 (1-PVALUE_OG-v5) MIMAT0000265
2048	0.998605				1-PVALUE_OG-v5	2048		ENST00000295966	hsa-miR-146a*	gene-gene-pos	#NAME?	0.998605					FALSE	gene-gene-pos		#NAME?	200844	C3orf67	hsa-miR-146a*	hsa-miR-146a*	200844 (1-PVALUE_OG-v5) hsa-miR-146a*
2049					miRanda-SCORE-v5	2049		ENST00000295966	hsa-miR-146a*	gene-gene-pos	#NAME?	0.665196	0.665196				FALSE	gene-gene-pos		#NAME?	200844	C3orf67	hsa-miR-146a*	hsa-miR-146a*	200844 (miRanda-SCORE-v5) hsa-miR-146a*
2050	0.999339				1-PVALUE_OG-v5	2050		ENST00000296327	hsa-miR-423-5p	gene-gene-pos	#NAME?	0.999339					FALSE	gene-gene-pos		#NAME?	200931	SLC51A	MIMAT0004748	hsa-miR-423-5p	200931 (1-PVALUE_OG-v5) MIMAT0004748
2051					miRanda-SCORE-v5	2051		ENST00000296327	hsa-miR-423-5p	gene-gene-pos	#NAME?	0.769292	0.769292				FALSE	gene-gene-pos		#NAME?	200931	SLC51A	MIMAT0004748	hsa-miR-423-5p	200931 (miRanda-SCORE-v5) MIMAT0004748
2052	0.995826				1-PVALUE_OG-v5	2052		ENST00000290470	hsa-miR-638	gene-gene-pos	#NAME?	0.995826					FALSE	gene-gene-pos		#NAME?	201176	ARHGAP27	MIMAT0003308	hsa-miR-638	201176 (1-PVALUE_OG-v5) MIMAT0003308
2053					miRanda-SCORE-v5	2053		ENST00000290470	hsa-miR-638	gene-gene-pos	#NAME?	0.623132	0.623132				FALSE	gene-gene-pos		#NAME?	201176	ARHGAP27	MIMAT0003308	hsa-miR-638	201176 (miRanda-SCORE-v5) MIMAT0003308
2054	0.994221				1-PVALUE_OG-v5	2054		ENST00000290470	hsa-miR-423-5p	gene-gene-pos	#NAME?	0.994221					FALSE	gene-gene-pos		#NAME?	201176	ARHGAP27	MIMAT0004748	hsa-miR-423-5p	201176 (1-PVALUE_OG-v5) MIMAT0004748
2055					miRanda-SCORE-v5	2055		ENST00000290470	hsa-miR-423-5p	gene-gene-pos	#NAME?	0.701416	0.701416				FALSE	gene-gene-pos		#NAME?	201176	ARHGAP27	MIMAT0004748	hsa-miR-423-5p	201176 (miRanda-SCORE-v5) MIMAT0004748
2056	0.959702				1-PVALUE_OG-v5	2056		ENST00000290470	hsa-miR-939	gene-gene-pos	#NAME?	0.959702					FALSE	gene-gene-pos		#NAME?	201176	ARHGAP27	MIMAT0004982	hsa-miR-939-5p	201176 (1-PVALUE_OG-v5) MIMAT0004982
2057					miRanda-SCORE-v5	2057		ENST00000290470	hsa-miR-939	gene-gene-pos	#NAME?	0.70706	0.70706				FALSE	gene-gene-pos		#NAME?	201176	ARHGAP27	MIMAT0004982	hsa-miR-939-5p	201176 (miRanda-SCORE-v5) MIMAT0004982
2058	0.991075				1-PVALUE_OG-v5	2058		ENST00000000442	hsa-miR-767-3p	gene-gene-pos	#NAME?	0.991075					FALSE	gene-gene-pos		#NAME?	2101	ESRRA	MIMAT0003883	hsa-miR-767-3p	2101 (1-PVALUE_OG-v5) MIMAT0003883
2059					miRanda-SCORE-v5	2059		ENST00000000442	hsa-miR-767-3p	gene-gene-pos	#NAME?	0.641832	0.641832				FALSE	gene-gene-pos		#NAME?	2101	ESRRA	MIMAT0003883	hsa-miR-767-3p	2101 (miRanda-SCORE-v5) MIMAT0003883
2060	0.998337				1-PVALUE_OG-v5	2060		ENST00000301607	hsa-miR-638	gene-gene-pos	#NAME?	0.998337					FALSE	gene-gene-pos		#NAME?	2125	EVPL	MIMAT0003308	hsa-miR-638	2125 (1-PVALUE_OG-v5) MIMAT0003308
2061					miRanda-SCORE-v5	2061		ENST00000301607	hsa-miR-638	gene-gene-pos	#NAME?	0.708308	0.708308				FALSE	gene-gene-pos		#NAME?	2125	EVPL	MIMAT0003308	hsa-miR-638	2125 (miRanda-SCORE-v5) MIMAT0003308
2062					validated miRTarBase	2062	18185580	2181	hsa-miR-335-5p	gene-gene-pos	#NAME?	0.75		18185580			FALSE	gene-gene-pos	18185580	#NAME?	2181	ACSL3	MIMAT0000765	hsa-miR-335-5p	2181 (validated miRTarBase) MIMAT0000765		0.75
2063					miRanda-SCORE-v5	2063		ENST00000324866	hsa-miR-335	gene-gene-pos	#NAME?	0.724864	0.724864				FALSE	gene-gene-pos		#NAME?	220074	LRTOMT	MIMAT0000765	hsa-miR-335-5p	220074 (miRanda-SCORE-v5) MIMAT0000765
2064	0.993736				1-PVALUE_OG-v5	2064		ENST00000324866	hsa-miR-335	gene-gene-pos	#NAME?	0.993736					FALSE	gene-gene-pos		#NAME?	220074	LRTOMT	MIMAT0000765	hsa-miR-335-5p	220074 (1-PVALUE_OG-v5) MIMAT0000765
2065	0.966876				1-PVALUE_OG-v5	2065		ENST00000301785	hsa-miR-204	gene-gene-pos	#NAME?	0.966876					FALSE	gene-gene-pos		#NAME?	221092	HNRNPUL2	MIMAT0000265	hsa-miR-204-5p	221092 (1-PVALUE_OG-v5) MIMAT0000265
2066					miRanda-SCORE-v5	2066		ENST00000301785	hsa-miR-204	gene-gene-pos	#NAME?	0.6874	0.6874				FALSE	gene-gene-pos		#NAME?	221092	HNRNPUL2	MIMAT0000265	hsa-miR-204-5p	221092 (miRanda-SCORE-v5) MIMAT0000265
2067					miRanda-SCORE-v5	2067		ENST00000301785	hsa-miR-18b*	gene-gene-pos	#NAME?	0.721988	0.721988				FALSE	gene-gene-pos		#NAME?	221092	HNRNPUL2	hsa-miR-18b*	hsa-miR-18b*	221092 (miRanda-SCORE-v5) hsa-miR-18b*
2068	0.995202				1-PVALUE_OG-v5	2068		ENST00000301785	hsa-miR-18b*	gene-gene-pos	#NAME?	0.995202					FALSE	gene-gene-pos		#NAME?	221092	HNRNPUL2	hsa-miR-18b*	hsa-miR-18b*	221092 (1-PVALUE_OG-v5) hsa-miR-18b*
2069					validated miRTarBase	2069	18185580	221395	hsa-miR-335-5p	gene-gene-pos	#NAME?	0.75		18185580			FALSE	gene-gene-pos	18185580	#NAME?	221395	ADGRF5	MIMAT0000765	hsa-miR-335-5p	221395 (validated miRTarBase) MIMAT0000765		0.75
2070	0.997274				1-PVALUE_OG-v5	2070		ENST00000293760	hsa-miR-767-3p	gene-gene-pos	#NAME?	0.997274					FALSE	gene-gene-pos		#NAME?	221496	LEMD2	MIMAT0003883	hsa-miR-767-3p	221496 (1-PVALUE_OG-v5) MIMAT0003883
2071					miRanda-SCORE-v5	2071		ENST00000293760	hsa-miR-767-3p	gene-gene-pos	#NAME?	0.651	0.651				FALSE	gene-gene-pos		#NAME?	221496	LEMD2	MIMAT0003883	hsa-miR-767-3p	221496 (miRanda-SCORE-v5) MIMAT0003883
2072					validated miRTarBase	2072	18185580	2222	hsa-miR-335-5p	gene-gene-pos	#NAME?	0.75		18185580			FALSE	gene-gene-pos	18185580	#NAME?	2222	FDFT1	MIMAT0000765	hsa-miR-335-5p	2222 (validated miRTarBase) MIMAT0000765		0.75
2073					miRanda-SCORE-v5	2073		ENST00000220584	hsa-miR-146a*	gene-gene-pos	#NAME?	0.6763	0.6763				FALSE	gene-gene-pos		#NAME?	2222	FDFT1	hsa-miR-146a*	hsa-miR-146a*	2222 (miRanda-SCORE-v5) hsa-miR-146a*
2074	0.96996				1-PVALUE_OG-v5	2074		ENST00000220584	hsa-miR-146a*	gene-gene-pos	#NAME?	0.96996					FALSE	gene-gene-pos		#NAME?	2222	FDFT1	hsa-miR-146a*	hsa-miR-146a*	2222 (1-PVALUE_OG-v5) hsa-miR-146a*
2075					miRanda-SCORE-v5	2075		ENST00000302068	hsa-miR-335	gene-gene-pos	#NAME?	0.63902	0.63902				FALSE	gene-gene-pos		#NAME?	2244	FGB	MIMAT0000765	hsa-miR-335-5p	2244 (miRanda-SCORE-v5) MIMAT0000765
2076	0.991734				1-PVALUE_OG-v5	2076		ENST00000302068	hsa-miR-335	gene-gene-pos	#NAME?	0.991734					FALSE	gene-gene-pos		#NAME?	2244	FGB	MIMAT0000765	hsa-miR-335-5p	2244 (1-PVALUE_OG-v5) MIMAT0000765
2077					miRanda-SCORE-v5	2077		ENST00000293068	hsa-miR-423-5p	gene-gene-pos	#NAME?	0.684568	0.684568				FALSE	gene-gene-pos		#NAME?	22806	IKZF3	MIMAT0004748	hsa-miR-423-5p	22806 (miRanda-SCORE-v5) MIMAT0004748
2078	0.960408				1-PVALUE_OG-v5	2078		ENST00000293068	hsa-miR-423-5p	gene-gene-pos	#NAME?	0.960408					FALSE	gene-gene-pos		#NAME?	22806	IKZF3	MIMAT0004748	hsa-miR-423-5p	22806 (1-PVALUE_OG-v5) MIMAT0004748
2079					validated miRTarBase	2079	23824327	22846	hsa-miR-204-5p	gene-gene-pos	#NAME?	0.75		23824327			FALSE	gene-gene-pos	23824327	#NAME?	22846	VASH1	MIMAT0000265	hsa-miR-204-5p	22846 (validated miRTarBase) MIMAT0000265		0.75
2080					validated miRTarBase	2080	18185580	22846	hsa-miR-335-5p	gene-gene-pos	#NAME?	0.75		18185580			FALSE	gene-gene-pos	18185580	#NAME?	22846	VASH1	MIMAT0000765	hsa-miR-335-5p	22846 (validated miRTarBase) MIMAT0000765		0.75
2081					validated miRTarBase	2081	23622248	2288	hsa-miR-423-5p	gene-gene-pos	#NAME?	0.75		23622248			FALSE	gene-gene-pos	23622248	#NAME?	2288	FKBP4	MIMAT0004748	hsa-miR-423-5p	2288 (validated miRTarBase) MIMAT0004748		0.75
2082	0.952617				1-PVALUE_OG-v5	2082		ENST00000001008	hsa-miR-18b*	gene-gene-pos	#NAME?	0.952617					FALSE	gene-gene-pos		#NAME?	2288	FKBP4	hsa-miR-18b*	hsa-miR-18b*	2288 (1-PVALUE_OG-v5) hsa-miR-18b*
2083					miRanda-SCORE-v5	2083		ENST00000001008	hsa-miR-18b*	gene-gene-pos	#NAME?	0.618488	0.618488				FALSE	gene-gene-pos		#NAME?	2288	FKBP4	hsa-miR-18b*	hsa-miR-18b*	2288 (miRanda-SCORE-v5) hsa-miR-18b*
2084					validated miRTarBase	2084	18185580	22890	hsa-miR-335-5p	gene-gene-pos	#NAME?	0.75		18185580			FALSE	gene-gene-pos	18185580	#NAME?	22890	ZBTB1	MIMAT0000765	hsa-miR-335-5p	22890 (validated miRTarBase) MIMAT0000765		0.75
2085					miRanda-SCORE-v5	2085		ENST00000326019	hsa-miR-204	gene-gene-pos	#NAME?	0.714056	0.714056				FALSE	gene-gene-pos		#NAME?	22950	SLC4A1AP	MIMAT0000265	hsa-miR-204-5p	22950 (miRanda-SCORE-v5) MIMAT0000265
2086	0.980985				1-PVALUE_OG-v5	2086		ENST00000326019	hsa-miR-204	gene-gene-pos	#NAME?	0.980985					FALSE	gene-gene-pos		#NAME?	22950	SLC4A1AP	MIMAT0000265	hsa-miR-204-5p	22950 (1-PVALUE_OG-v5) MIMAT0000265
2087					miRanda-SCORE-v5	2087		ENST00000326019	hsa-miR-335	gene-gene-pos	#NAME?	0.746668	0.746668				FALSE	gene-gene-pos		#NAME?	22950	SLC4A1AP	MIMAT0000765	hsa-miR-335-5p	22950 (miRanda-SCORE-v5) MIMAT0000765
2088	0.996327				1-PVALUE_OG-v5	2088		ENST00000326019	hsa-miR-335	gene-gene-pos	#NAME?	0.996327					FALSE	gene-gene-pos		#NAME?	22950	SLC4A1AP	MIMAT0000765	hsa-miR-335-5p	22950 (1-PVALUE_OG-v5) MIMAT0000765
2089					validated miRTarBase	2089	18185580	22982	hsa-miR-335-5p	gene-gene-pos	#NAME?	0.75		18185580			FALSE	gene-gene-pos	18185580	#NAME?	22982	DIP2C	MIMAT0000765	hsa-miR-335-5p	22982 (validated miRTarBase) MIMAT0000765		0.75
2090					miRanda-SCORE-v5	2090		ENST00000369797	hsa-miR-767-3p	gene-gene-pos	#NAME?	0.623832	0.623832				FALSE	gene-gene-pos		#NAME?	22984	PDCD11	MIMAT0003883	hsa-miR-767-3p	22984 (miRanda-SCORE-v5) MIMAT0003883
2091	0.994109				1-PVALUE_OG-v5	2091		ENST00000369797	hsa-miR-767-3p	gene-gene-pos	#NAME?	0.994109					FALSE	gene-gene-pos		#NAME?	22984	PDCD11	MIMAT0003883	hsa-miR-767-3p	22984 (1-PVALUE_OG-v5) MIMAT0003883
2092					miRanda-SCORE-v5	2092		ENST00000369797	hsa-miR-146a*	gene-gene-pos	#NAME?	0.6638	0.6638				FALSE	gene-gene-pos		#NAME?	22984	PDCD11	hsa-miR-146a*	hsa-miR-146a*	22984 (miRanda-SCORE-v5) hsa-miR-146a*
2093	0.959882				1-PVALUE_OG-v5	2093		ENST00000369797	hsa-miR-146a*	gene-gene-pos	#NAME?	0.959882					FALSE	gene-gene-pos		#NAME?	22984	PDCD11	hsa-miR-146a*	hsa-miR-146a*	22984 (1-PVALUE_OG-v5) hsa-miR-146a*
2094	0.996872				1-PVALUE_OG-v5	2094		ENST00000262710	hsa-miR-204	gene-gene-pos	#NAME?	0.996872					FALSE	gene-gene-pos		#NAME?	22985	ACIN1	MIMAT0000265	hsa-miR-204-5p	22985 (1-PVALUE_OG-v5) MIMAT0000265
2095					miRanda-SCORE-v5	2095		ENST00000262710	hsa-miR-204	gene-gene-pos	#NAME?	0.6493	0.6493				FALSE	gene-gene-pos		#NAME?	22985	ACIN1	MIMAT0000265	hsa-miR-204-5p	22985 (miRanda-SCORE-v5) MIMAT0000265
2096					validated miRTarBase	2096	18185580	23060	hsa-miR-335-5p	gene-gene-pos	#NAME?	0.75		18185580			FALSE	gene-gene-pos	18185580	#NAME?	23060	ZNF609	MIMAT0000765	hsa-miR-335-5p	23060 (validated miRTarBase) MIMAT0000765		0.75
2097					validated miRTarBase	2097	18185580	23064	hsa-miR-335-5p	gene-gene-pos	#NAME?	0.75		18185580			FALSE	gene-gene-pos	18185580	#NAME?	23064	SETX	MIMAT0000765	hsa-miR-335-5p	23064 (validated miRTarBase) MIMAT0000765		0.75
2098	0.966794				1-PVALUE_OG-v5	2098		ENST00000224140	hsa-miR-146a*	gene-gene-pos	#NAME?	0.966794					FALSE	gene-gene-pos		#NAME?	23064	SETX	hsa-miR-146a*	hsa-miR-146a*	23064 (1-PVALUE_OG-v5) hsa-miR-146a*
2099					miRanda-SCORE-v5	2099		ENST00000224140	hsa-miR-146a*	gene-gene-pos	#NAME?	0.671984	0.671984				FALSE	gene-gene-pos		#NAME?	23064	SETX	hsa-miR-146a*	hsa-miR-146a*	23064 (miRanda-SCORE-v5) hsa-miR-146a*
2100					validated miRTarBase	2100	18185580	23085	hsa-miR-335-5p	gene-gene-pos	#NAME?	0.75		18185580			FALSE	gene-gene-pos	18185580	#NAME?	23085	ERC1	MIMAT0000765	hsa-miR-335-5p	23085 (validated miRTarBase) MIMAT0000765		0.75
2101					validated miRTarBase	2101	23592263	23085	hsa-miR-939-5p	gene-gene-pos	#NAME?	0.75		23592263			FALSE	gene-gene-pos	23592263	#NAME?	23085	ERC1	MIMAT0004982	hsa-miR-939-5p	23085 (validated miRTarBase) MIMAT0004982		0.75
2102					validated miRTarBase	2102	18185580	23181	hsa-miR-335-5p	gene-gene-pos	#NAME?	0.75		18185580			FALSE	gene-gene-pos	18185580	#NAME?	23181	DIP2A	MIMAT0000765	hsa-miR-335-5p	23181 (validated miRTarBase) MIMAT0000765		0.75
2103					validated miRTarBase	2103	23622248	23181	hsa-miR-423-5p	gene-gene-pos	#NAME?	0.75		23622248			FALSE	gene-gene-pos	23622248	#NAME?	23181	DIP2A	MIMAT0004748	hsa-miR-423-5p	23181 (validated miRTarBase) MIMAT0004748		0.75
2104					validated miRTarBase	2104	23622248	23203	hsa-miR-423-5p	gene-gene-pos	#NAME?	0.75		23622248			FALSE	gene-gene-pos	23622248	#NAME?	23203	PMPCA	MIMAT0004748	hsa-miR-423-5p	23203 (validated miRTarBase) MIMAT0004748		0.75
2105	0.99503				1-PVALUE_OG-v5	2105		ENST00000360359	hsa-miR-767-3p	gene-gene-pos	#NAME?	0.99503					FALSE	gene-gene-pos		#NAME?	23294	ANKS1A	MIMAT0003883	hsa-miR-767-3p	23294 (1-PVALUE_OG-v5) MIMAT0003883
2106					miRanda-SCORE-v5	2106		ENST00000360359	hsa-miR-767-3p	gene-gene-pos	#NAME?	0.628684	0.628684				FALSE	gene-gene-pos		#NAME?	23294	ANKS1A	MIMAT0003883	hsa-miR-767-3p	23294 (miRanda-SCORE-v5) MIMAT0003883
2107					validated miRTarBase	2107	24906430	23299	hsa-miR-939-5p	gene-gene-pos	#NAME?	0.75		24906430			FALSE	gene-gene-pos	24906430	#NAME?	23299	BICD2	MIMAT0004982	hsa-miR-939-5p	23299 (validated miRTarBase) MIMAT0004982		0.75
2108					validated miRTarBase	2108	18185580	23355	hsa-miR-335-5p	gene-gene-pos	#NAME?	0.75		18185580			FALSE	gene-gene-pos	18185580	#NAME?	23355	VPS8	MIMAT0000765	hsa-miR-335-5p	23355 (validated miRTarBase) MIMAT0000765		0.75
2109	0.988458				1-PVALUE_OG-v5	2109		ENST00000373873	hsa-miR-423-5p	gene-gene-pos	#NAME?	0.988458					FALSE	gene-gene-pos		#NAME?	23363	OBSL1	MIMAT0004748	hsa-miR-423-5p	23363 (1-PVALUE_OG-v5) MIMAT0004748
2110					miRanda-SCORE-v5	2110		ENST00000373873	hsa-miR-423-5p	gene-gene-pos	#NAME?	0.742144	0.742144				FALSE	gene-gene-pos		#NAME?	23363	OBSL1	MIMAT0004748	hsa-miR-423-5p	23363 (miRanda-SCORE-v5) MIMAT0004748
2111					miRanda-SCORE-v5	2111		ENST00000289656	hsa-miR-18b*	gene-gene-pos	#NAME?	0.65208	0.65208				FALSE	gene-gene-pos		#NAME?	23363	OBSL1	hsa-miR-18b*	hsa-miR-18b*	23363 (miRanda-SCORE-v5) hsa-miR-18b*
2112	0.977223				1-PVALUE_OG-v5	2112		ENST00000289656	hsa-miR-18b*	gene-gene-pos	#NAME?	0.977223					FALSE	gene-gene-pos		#NAME?	23363	OBSL1	hsa-miR-18b*	hsa-miR-18b*	23363 (1-PVALUE_OG-v5) hsa-miR-18b*
2113					miRanda-SCORE-v5	2113		ENST00000361078	hsa-miR-335	gene-gene-pos	#NAME?	0.660688	0.660688				FALSE	gene-gene-pos		#NAME?	23369	PUM2	MIMAT0000765	hsa-miR-335-5p	23369 (miRanda-SCORE-v5) MIMAT0000765
2114	0.992979				1-PVALUE_OG-v5	2114		ENST00000361078	hsa-miR-335	gene-gene-pos	#NAME?	0.992979					FALSE	gene-gene-pos		#NAME?	23369	PUM2	MIMAT0000765	hsa-miR-335-5p	23369 (1-PVALUE_OG-v5) MIMAT0000765
2115	0.999963				1-PVALUE_OG-v5	2115		ENST00000230771	hsa-miR-767-3p	gene-gene-pos	#NAME?	0.999963					FALSE	gene-gene-pos		#NAME?	23438	HARS2	MIMAT0003883	hsa-miR-767-3p	23438 (1-PVALUE_OG-v5) MIMAT0003883
2116					miRanda-SCORE-v5	2116		ENST00000230771	hsa-miR-767-3p	gene-gene-pos	#NAME?	0.688648	0.688648				FALSE	gene-gene-pos		#NAME?	23438	HARS2	MIMAT0003883	hsa-miR-767-3p	23438 (miRanda-SCORE-v5) MIMAT0003883
2117					validated miRTarBase	2117	18185580	23461	hsa-miR-335-5p	gene-gene-pos	#NAME?	0.75		18185580			FALSE	gene-gene-pos	18185580	#NAME?	23461	ABCA5	MIMAT0000765	hsa-miR-335-5p	23461 (validated miRTarBase) MIMAT0000765		0.75
2118					validated miRTarBase	2118	23824327	23534	hsa-miR-767-3p	gene-gene-pos	#NAME?	0.75		23824327			FALSE	gene-gene-pos	23824327	#NAME?	23534	TNPO3	MIMAT0003883	hsa-miR-767-3p	23534 (validated miRTarBase) MIMAT0003883		0.75
2119	0.972588				1-PVALUE_OG-v5	2119		ENST00000360059	hsa-miR-335	gene-gene-pos	#NAME?	0.972588					FALSE	gene-gene-pos		#NAME?	23560	GTPBP4	MIMAT0000765	hsa-miR-335-5p	23560 (1-PVALUE_OG-v5) MIMAT0000765
2120					miRanda-SCORE-v5	2120		ENST00000360059	hsa-miR-335	gene-gene-pos	#NAME?	0.609364	0.609364				FALSE	gene-gene-pos		#NAME?	23560	GTPBP4	MIMAT0000765	hsa-miR-335-5p	23560 (miRanda-SCORE-v5) MIMAT0000765
2121					validated miRTarBase	2121	22100165	23560	hsa-miR-939-5p	gene-gene-pos	#NAME?	0.75		22100165			FALSE	gene-gene-pos	22100165	#NAME?	23560	GTPBP4	MIMAT0004982	hsa-miR-939-5p	23560 (validated miRTarBase) MIMAT0004982		0.75
2122	0.983582				1-PVALUE_OG-v5	2122		ENST00000373228	hsa-miR-939	gene-gene-pos	#NAME?	0.983582					FALSE	gene-gene-pos		#NAME?	2356	FPGS	MIMAT0004982	hsa-miR-939-5p	2356 (1-PVALUE_OG-v5) MIMAT0004982
2123					miRanda-SCORE-v5	2123		ENST00000373228	hsa-miR-939	gene-gene-pos	#NAME?	0.752096	0.752096				FALSE	gene-gene-pos		#NAME?	2356	FPGS	MIMAT0004982	hsa-miR-939-5p	2356 (miRanda-SCORE-v5) MIMAT0004982
2124					miRanda-SCORE-v5	2124		ENST00000368013	hsa-miR-767-3p	gene-gene-pos	#NAME?	0.617332	0.617332				FALSE	gene-gene-pos		#NAME?	257106	ARHGAP30	MIMAT0003883	hsa-miR-767-3p	257106 (miRanda-SCORE-v5) MIMAT0003883
2125	0.988789				1-PVALUE_OG-v5	2125		ENST00000368013	hsa-miR-767-3p	gene-gene-pos	#NAME?	0.988789					FALSE	gene-gene-pos		#NAME?	257106	ARHGAP30	MIMAT0003883	hsa-miR-767-3p	257106 (1-PVALUE_OG-v5) MIMAT0003883
2126					miRanda-SCORE-v5	2126		ENST00000368015	hsa-miR-18b*	gene-gene-pos	#NAME?	0.624728	0.624728				FALSE	gene-gene-pos		#NAME?	257106	ARHGAP30	hsa-miR-18b*	hsa-miR-18b*	257106 (miRanda-SCORE-v5) hsa-miR-18b*
2127	0.958581				1-PVALUE_OG-v5	2127		ENST00000368015	hsa-miR-18b*	gene-gene-pos	#NAME?	0.958581					FALSE	gene-gene-pos		#NAME?	257106	ARHGAP30	hsa-miR-18b*	hsa-miR-18b*	257106 (1-PVALUE_OG-v5) hsa-miR-18b*
2128					validated miRTarBase	2128	18185580	25794	hsa-miR-335-5p	gene-gene-pos	#NAME?	0.75		18185580			FALSE	gene-gene-pos	18185580	#NAME?	25794	FSCN2	MIMAT0000765	hsa-miR-335-5p	25794 (validated miRTarBase) MIMAT0000765		0.75
2129	0.999247				1-PVALUE_OG-v5	2129		ENST00000334850	hsa-miR-939	gene-gene-pos	#NAME?	0.999247					FALSE	gene-gene-pos		#NAME?	25794	FSCN2	MIMAT0004982	hsa-miR-939-5p	25794 (1-PVALUE_OG-v5) MIMAT0004982
2130					miRanda-SCORE-v5	2130		ENST00000334850	hsa-miR-939	gene-gene-pos	#NAME?	0.664596	0.664596				FALSE	gene-gene-pos		#NAME?	25794	FSCN2	MIMAT0004982	hsa-miR-939-5p	25794 (miRanda-SCORE-v5) MIMAT0004982
2131	0.985963				1-PVALUE_OG-v5	2131		ENST00000367288	hsa-miR-204	gene-gene-pos	#NAME?	0.985963					FALSE	gene-gene-pos		#NAME?	25802	LMOD1	MIMAT0000265	hsa-miR-204-5p	25802 (1-PVALUE_OG-v5) MIMAT0000265
2132					miRanda-SCORE-v5	2132		ENST00000367288	hsa-miR-204	gene-gene-pos	#NAME?	0.652772	0.652772				FALSE	gene-gene-pos		#NAME?	25802	LMOD1	MIMAT0000265	hsa-miR-204-5p	25802 (miRanda-SCORE-v5) MIMAT0000265
2133					validated miRTarBase	2133	18185580	25802	hsa-miR-335-5p	gene-gene-pos	#NAME?	0.75		18185580			FALSE	gene-gene-pos	18185580	#NAME?	25802	LMOD1	MIMAT0000765	hsa-miR-335-5p	25802 (validated miRTarBase) MIMAT0000765		0.75
2134					miRanda-SCORE-v5	2134		ENST00000374497	hsa-miR-550	gene-gene-pos	#NAME?	0.720756	0.720756				FALSE	gene-gene-pos		#NAME?	2582	GALE	MIMAT0004800	hsa-miR-550a-5p	2582 (miRanda-SCORE-v5) MIMAT0004800
2135	0.999329				1-PVALUE_OG-v5	2135		ENST00000374497	hsa-miR-550	gene-gene-pos	#NAME?	0.999329					FALSE	gene-gene-pos		#NAME?	2582	GALE	MIMAT0004800	hsa-miR-550a-5p	2582 (1-PVALUE_OG-v5) MIMAT0004800
2136					validated miRTarBase	2136	18185580	25831	hsa-miR-335-5p	gene-gene-pos	#NAME?	0.75		18185580			FALSE	gene-gene-pos	18185580	#NAME?	25831	HECTD1	MIMAT0000765	hsa-miR-335-5p	25831 (validated miRTarBase) MIMAT0000765		0.75
2137	0.981591				1-PVALUE_OG-v5	2137		ENST00000255674	hsa-miR-939	gene-gene-pos	#NAME?	0.981591					FALSE	gene-gene-pos		#NAME?	25914	RTTN	MIMAT0004982	hsa-miR-939-5p	25914 (1-PVALUE_OG-v5) MIMAT0004982
2138					miRanda-SCORE-v5	2138		ENST00000255674	hsa-miR-939	gene-gene-pos	#NAME?	0.70566	0.70566				FALSE	gene-gene-pos		#NAME?	25914	RTTN	MIMAT0004982	hsa-miR-939-5p	25914 (miRanda-SCORE-v5) MIMAT0004982
2139					miRanda-SCORE-v5	2139		ENST00000318010	hsa-miR-767-3p	gene-gene-pos	#NAME?	0.6177	0.6177				FALSE	gene-gene-pos		#NAME?	2595	GANC	MIMAT0003883	hsa-miR-767-3p	2595 (miRanda-SCORE-v5) MIMAT0003883
2140	0.99591				1-PVALUE_OG-v5	2140		ENST00000318010	hsa-miR-767-3p	gene-gene-pos	#NAME?	0.99591					FALSE	gene-gene-pos		#NAME?	2595	GANC	MIMAT0003883	hsa-miR-767-3p	2595 (1-PVALUE_OG-v5) MIMAT0003883
2141					validated miRTarBase	2141	18185580	26005	hsa-miR-335-5p	gene-gene-pos	#NAME?	0.75		18185580			FALSE	gene-gene-pos	18185580	#NAME?	26005	C2CD3	MIMAT0000765	hsa-miR-335-5p	26005 (validated miRTarBase) MIMAT0000765		0.75
2142					miRanda-SCORE-v5	2142		ENST00000313663	hsa-miR-638	gene-gene-pos	#NAME?	0.721756	0.721756				FALSE	gene-gene-pos		#NAME?	26005	C2CD3	MIMAT0003308	hsa-miR-638	26005 (miRanda-SCORE-v5) MIMAT0003308
2143	0.998593				1-PVALUE_OG-v5	2143		ENST00000313663	hsa-miR-638	gene-gene-pos	#NAME?	0.998593					FALSE	gene-gene-pos		#NAME?	26005	C2CD3	MIMAT0003308	hsa-miR-638	26005 (1-PVALUE_OG-v5) MIMAT0003308
2144					miRanda-SCORE-v5	2144		ENST00000313663	hsa-miR-767-3p	gene-gene-pos	#NAME?	0.710464	0.710464				FALSE	gene-gene-pos		#NAME?	26005	C2CD3	MIMAT0003883	hsa-miR-767-3p	26005 (miRanda-SCORE-v5) MIMAT0003883
2145	0.996947				1-PVALUE_OG-v5	2145		ENST00000313663	hsa-miR-767-3p	gene-gene-pos	#NAME?	0.996947					FALSE	gene-gene-pos		#NAME?	26005	C2CD3	MIMAT0003883	hsa-miR-767-3p	26005 (1-PVALUE_OG-v5) MIMAT0003883
2146					miRanda-SCORE-v5	2146		ENST00000313663	hsa-miR-939	gene-gene-pos	#NAME?	0.693552	0.693552				FALSE	gene-gene-pos		#NAME?	26005	C2CD3	MIMAT0004982	hsa-miR-939-5p	26005 (miRanda-SCORE-v5) MIMAT0004982
2147	0.996091				1-PVALUE_OG-v5	2147		ENST00000313663	hsa-miR-939	gene-gene-pos	#NAME?	0.996091					FALSE	gene-gene-pos		#NAME?	26005	C2CD3	MIMAT0004982	hsa-miR-939-5p	26005 (1-PVALUE_OG-v5) MIMAT0004982
2148					validated miRTarBase	2148	23622248	26061	hsa-miR-204-5p	gene-gene-pos	#NAME?	0.75		23622248			FALSE	gene-gene-pos	23622248	#NAME?	26061	HACL1	MIMAT0000265	hsa-miR-204-5p	26061 (validated miRTarBase) MIMAT0000265		0.75
2149	0.990859				1-PVALUE_OG-v5	2149		ENST00000389266	hsa-miR-18b*	gene-gene-pos	#NAME?	0.990859					FALSE	gene-gene-pos		#NAME?	2617	GARS	hsa-miR-18b*	hsa-miR-18b*	2617 (1-PVALUE_OG-v5) hsa-miR-18b*
2150					miRanda-SCORE-v5	2150		ENST00000389266	hsa-miR-18b*	gene-gene-pos	#NAME?	0.693132	0.693132				FALSE	gene-gene-pos		#NAME?	2617	GARS	hsa-miR-18b*	hsa-miR-18b*	2617 (miRanda-SCORE-v5) hsa-miR-18b*
2151	0.993614				1-PVALUE_OG-v5	2151		ENST00000370939	hsa-miR-146a*	gene-gene-pos	#NAME?	0.993614					FALSE	gene-gene-pos		#NAME?	26268	FBXO9	hsa-miR-146a*	hsa-miR-146a*	26268 (1-PVALUE_OG-v5) hsa-miR-146a*
2152					miRanda-SCORE-v5	2152		ENST00000370939	hsa-miR-146a*	gene-gene-pos	#NAME?	0.640584	0.640584				FALSE	gene-gene-pos		#NAME?	26268	FBXO9	hsa-miR-146a*	hsa-miR-146a*	26268 (miRanda-SCORE-v5) hsa-miR-146a*
2153					miRanda-SCORE-v5	2153		ENST00000264717	hsa-miR-335	gene-gene-pos	#NAME?	0.642588	0.642588				FALSE	gene-gene-pos		#NAME?	2646	GCKR	MIMAT0000765	hsa-miR-335-5p	2646 (miRanda-SCORE-v5) MIMAT0000765
2154	0.99527				1-PVALUE_OG-v5	2154		ENST00000264717	hsa-miR-335	gene-gene-pos	#NAME?	0.99527					FALSE	gene-gene-pos		#NAME?	2646	GCKR	MIMAT0000765	hsa-miR-335-5p	2646 (1-PVALUE_OG-v5) MIMAT0000765
2155					miRanda-SCORE-v5	2155		ENST00000310483	hsa-miR-204	gene-gene-pos	#NAME?	0.69306	0.69306				FALSE	gene-gene-pos		#NAME?	27173	SLC39A1	MIMAT0000265	hsa-miR-204-5p	27173 (miRanda-SCORE-v5) MIMAT0000265
2156	0.970538				1-PVALUE_OG-v5	2156		ENST00000310483	hsa-miR-204	gene-gene-pos	#NAME?	0.970538					FALSE	gene-gene-pos		#NAME?	27173	SLC39A1	MIMAT0000265	hsa-miR-204-5p	27173 (1-PVALUE_OG-v5) MIMAT0000265
2157					validated miRTarBase	2157	18185580	27178	hsa-miR-335-5p	gene-gene-pos	#NAME?	0.75		18185580			FALSE	gene-gene-pos	18185580	#NAME?	27178	IL37	MIMAT0000765	hsa-miR-335-5p	27178 (validated miRTarBase) MIMAT0000765		0.75
2158					validated miRTarBase	2158	18185580	27239	hsa-miR-335-5p	gene-gene-pos	#NAME?	0.75		18185580			FALSE	gene-gene-pos	18185580	#NAME?	27239	GPR162	MIMAT0000765	hsa-miR-335-5p	27239 (validated miRTarBase) MIMAT0000765		0.75
2159					miRanda-SCORE-v5	2159		ENST00000311268	hsa-miR-18b*	gene-gene-pos	#NAME?	0.654932	0.654932				FALSE	gene-gene-pos		#NAME?	27239	GPR162	hsa-miR-18b*	hsa-miR-18b*	27239 (miRanda-SCORE-v5) hsa-miR-18b*
2160	0.99873				1-PVALUE_OG-v5	2160		ENST00000311268	hsa-miR-18b*	gene-gene-pos	#NAME?	0.99873					FALSE	gene-gene-pos		#NAME?	27239	GPR162	hsa-miR-18b*	hsa-miR-18b*	27239 (1-PVALUE_OG-v5) hsa-miR-18b*
2161					validated miRTarBase	2161	18185580	27250	hsa-miR-335-5p	gene-gene-pos	#NAME?	0.75		18185580			FALSE	gene-gene-pos	18185580	#NAME?	27250	PDCD4	MIMAT0000765	hsa-miR-335-5p	27250 (validated miRTarBase) MIMAT0000765		0.75
2162					validated miRTarBase	2162	22012620	27284	hsa-miR-638	gene-gene-pos	#NAME?	0.75		22012620			FALSE	gene-gene-pos	22012620	#NAME?	27284	SULT1B1	MIMAT0003308	hsa-miR-638	27284 (validated miRTarBase) MIMAT0003308		0.75
2163					miRanda-SCORE-v5	2163		ENST00000339276	hsa-miR-550	gene-gene-pos	#NAME?	0.638396	0.638396				FALSE	gene-gene-pos		#NAME?	2810	SFN	MIMAT0004800	hsa-miR-550a-5p	2810 (miRanda-SCORE-v5) MIMAT0004800
2164	0.999825				1-PVALUE_OG-v5	2164		ENST00000339276	hsa-miR-550	gene-gene-pos	#NAME?	0.999825					FALSE	gene-gene-pos		#NAME?	2810	SFN	MIMAT0004800	hsa-miR-550a-5p	2810 (1-PVALUE_OG-v5) MIMAT0004800
2165					miRanda-SCORE-v5	2165		ENST00000356487	hsa-miR-423-5p	gene-gene-pos	#NAME?	0.710464	0.710464				FALSE	gene-gene-pos		#NAME?	2821	GPI	MIMAT0004748	hsa-miR-423-5p	2821 (miRanda-SCORE-v5) MIMAT0004748
2166	0.998986				1-PVALUE_OG-v5	2166		ENST00000356487	hsa-miR-423-5p	gene-gene-pos	#NAME?	0.998986					FALSE	gene-gene-pos		#NAME?	2821	GPI	MIMAT0004748	hsa-miR-423-5p	2821 (1-PVALUE_OG-v5) MIMAT0004748
2167	0.965687				1-PVALUE_OG-v5	2167		ENST00000356487	hsa-miR-939	gene-gene-pos	#NAME?	0.965687					FALSE	gene-gene-pos		#NAME?	2821	GPI	MIMAT0004982	hsa-miR-939-5p	2821 (1-PVALUE_OG-v5) MIMAT0004982
2168					miRanda-SCORE-v5	2168		ENST00000356487	hsa-miR-939	gene-gene-pos	#NAME?	0.689048	0.689048				FALSE	gene-gene-pos		#NAME?	2821	GPI	MIMAT0004982	hsa-miR-939-5p	2821 (miRanda-SCORE-v5) MIMAT0004982
2169					miRanda-SCORE-v5	2169		ENST00000278025	hsa-miR-423-5p	gene-gene-pos	#NAME?	0.65614	0.65614				FALSE	gene-gene-pos		#NAME?	282969	FUOM	MIMAT0004748	hsa-miR-423-5p	282969 (miRanda-SCORE-v5) MIMAT0004748
2170	0.992948				1-PVALUE_OG-v5	2170		ENST00000278025	hsa-miR-423-5p	gene-gene-pos	#NAME?	0.992948					FALSE	gene-gene-pos		#NAME?	282969	FUOM	MIMAT0004748	hsa-miR-423-5p	282969 (1-PVALUE_OG-v5) MIMAT0004748
2171	0.996355				1-PVALUE_OG-v5	2171		ENST00000368552	hsa-miR-18b*	gene-gene-pos	#NAME?	0.996355					FALSE	gene-gene-pos		#NAME?	282969	FUOM	hsa-miR-18b*	hsa-miR-18b*	282969 (1-PVALUE_OG-v5) hsa-miR-18b*
2172					miRanda-SCORE-v5	2172		ENST00000368552	hsa-miR-18b*	gene-gene-pos	#NAME?	0.654932	0.654932				FALSE	gene-gene-pos		#NAME?	282969	FUOM	hsa-miR-18b*	hsa-miR-18b*	282969 (miRanda-SCORE-v5) hsa-miR-18b*
2173					validated miRTarBase	2173	18185580	283208	hsa-miR-335-5p	gene-gene-pos	#NAME?	0.75		18185580			FALSE	gene-gene-pos	18185580	#NAME?	283208	P4HA3	MIMAT0000765	hsa-miR-335-5p	283208 (validated miRTarBase) MIMAT0000765		0.75
2174					validated miRTarBase	2174	23824327	283358	hsa-miR-204-5p	gene-gene-pos	#NAME?	0.75		23824327			FALSE	gene-gene-pos	23824327	#NAME?	283358	B4GALNT3	MIMAT0000265	hsa-miR-204-5p	283358 (validated miRTarBase) MIMAT0000265		0.75
2175					miRanda-SCORE-v5	2175		ENST00000266383	hsa-miR-939	gene-gene-pos	#NAME?	0.681984	0.681984				FALSE	gene-gene-pos		#NAME?	283358	B4GALNT3	MIMAT0004982	hsa-miR-939-5p	283358 (miRanda-SCORE-v5) MIMAT0004982
2176	0.999795				1-PVALUE_OG-v5	2176		ENST00000266383	hsa-miR-939	gene-gene-pos	#NAME?	0.999795					FALSE	gene-gene-pos		#NAME?	283358	B4GALNT3	MIMAT0004982	hsa-miR-939-5p	283358 (1-PVALUE_OG-v5) MIMAT0004982
2177	0.99275				1-PVALUE_OG-v5	2177		ENST00000312942	hsa-miR-18b*	gene-gene-pos	#NAME?	0.99275					FALSE	gene-gene-pos		#NAME?	283518	KCNRG	hsa-miR-18b*	hsa-miR-18b*	283518 (1-PVALUE_OG-v5) hsa-miR-18b*
2178					miRanda-SCORE-v5	2178		ENST00000312942	hsa-miR-18b*	gene-gene-pos	#NAME?	0.70348	0.70348				FALSE	gene-gene-pos		#NAME?	283518	KCNRG	hsa-miR-18b*	hsa-miR-18b*	283518 (miRanda-SCORE-v5) hsa-miR-18b*
2179	0.954351				1-PVALUE_OG-v5	2179		ENST00000304516	hsa-miR-149*	gene-gene-pos	#NAME?	0.954351					FALSE	gene-gene-pos		#NAME?	283899	INO80E	hsa-miR-149*	hsa-miR-149*	283899 (1-PVALUE_OG-v5) hsa-miR-149*
2180					miRanda-SCORE-v5	2180		ENST00000304516	hsa-miR-149*	gene-gene-pos	#NAME?	0.717852	0.717852				FALSE	gene-gene-pos		#NAME?	283899	INO80E	hsa-miR-149*	hsa-miR-149*	283899 (miRanda-SCORE-v5) hsa-miR-149*
2181					validated miRTarBase	2181	18185580	28514	hsa-miR-335-5p	gene-gene-pos	#NAME?	0.75		18185580			FALSE	gene-gene-pos	18185580	#NAME?	28514	DLL1	MIMAT0000765	hsa-miR-335-5p	28514 (validated miRTarBase) MIMAT0000765		0.75
2182					miRanda-SCORE-v5	2182		ENST00000272845	hsa-miR-767-3p	gene-gene-pos	#NAME?	0.620328	0.620328				FALSE	gene-gene-pos		#NAME?	285175	UNC80	MIMAT0003883	hsa-miR-767-3p	285175 (miRanda-SCORE-v5) MIMAT0003883
2183	0.999565				1-PVALUE_OG-v5	2183		ENST00000272845	hsa-miR-767-3p	gene-gene-pos	#NAME?	0.999565					FALSE	gene-gene-pos		#NAME?	285175	UNC80	MIMAT0003883	hsa-miR-767-3p	285175 (1-PVALUE_OG-v5) MIMAT0003883
2184	0.993429				1-PVALUE_OG-v5	2184		ENST00000371561	hsa-miR-767-3p	gene-gene-pos	#NAME?	0.993429					FALSE	gene-gene-pos		#NAME?	2902	GRIN1	MIMAT0003883	hsa-miR-767-3p	2902 (1-PVALUE_OG-v5) MIMAT0003883
2185					miRanda-SCORE-v5	2185		ENST00000371561	hsa-miR-767-3p	gene-gene-pos	#NAME?	0.636184	0.636184				FALSE	gene-gene-pos		#NAME?	2902	GRIN1	MIMAT0003883	hsa-miR-767-3p	2902 (miRanda-SCORE-v5) MIMAT0003883
2186	0.99627				1-PVALUE_OG-v5	2186		ENST00000371561	hsa-miR-423-5p	gene-gene-pos	#NAME?	0.99627					FALSE	gene-gene-pos		#NAME?	2902	GRIN1	MIMAT0004748	hsa-miR-423-5p	2902 (1-PVALUE_OG-v5) MIMAT0004748
2187					miRanda-SCORE-v5	2187		ENST00000371561	hsa-miR-423-5p	gene-gene-pos	#NAME?	0.671308	0.671308				FALSE	gene-gene-pos		#NAME?	2902	GRIN1	MIMAT0004748	hsa-miR-423-5p	2902 (miRanda-SCORE-v5) MIMAT0004748
2188	0.950877				1-PVALUE_OG-v5	2188		ENST00000355289	hsa-miR-423-5p	gene-gene-pos	#NAME?	0.950877					FALSE	gene-gene-pos		#NAME?	2911	GRM1	MIMAT0004748	hsa-miR-423-5p	2911 (1-PVALUE_OG-v5) MIMAT0004748
2189					miRanda-SCORE-v5	2189		ENST00000355289	hsa-miR-423-5p	gene-gene-pos	#NAME?	0.674264	0.674264				FALSE	gene-gene-pos		#NAME?	2911	GRM1	MIMAT0004748	hsa-miR-423-5p	2911 (miRanda-SCORE-v5) MIMAT0004748
2190					miRanda-SCORE-v5	2190		ENST00000283875	hsa-miR-423-5p	gene-gene-pos	#NAME?	0.7345	0.7345				FALSE	gene-gene-pos		#NAME?	2960	GTF2E1	MIMAT0004748	hsa-miR-423-5p	2960 (miRanda-SCORE-v5) MIMAT0004748
2191	0.991663				1-PVALUE_OG-v5	2191		ENST00000283875	hsa-miR-423-5p	gene-gene-pos	#NAME?	0.991663					FALSE	gene-gene-pos		#NAME?	2960	GTF2E1	MIMAT0004748	hsa-miR-423-5p	2960 (1-PVALUE_OG-v5) MIMAT0004748
2192					validated miRTarBase	2192	23622248	2962	hsa-miR-423-5p	gene-gene-pos	#NAME?	0.75		23622248			FALSE	gene-gene-pos	23622248	#NAME?	2962	GTF2F1	MIMAT0004748	hsa-miR-423-5p	2962 (validated miRTarBase) MIMAT0004748		0.75
2193	0.956817				1-PVALUE_OG-v5	2193		ENST00000298838	hsa-miR-423-5p	gene-gene-pos	#NAME?	0.956817					FALSE	gene-gene-pos		#NAME?	29763	PACSIN3	MIMAT0004748	hsa-miR-423-5p	29763 (1-PVALUE_OG-v5) MIMAT0004748
2194					miRanda-SCORE-v5	2194		ENST00000298838	hsa-miR-423-5p	gene-gene-pos	#NAME?	0.680432	0.680432				FALSE	gene-gene-pos		#NAME?	29763	PACSIN3	MIMAT0004748	hsa-miR-423-5p	29763 (miRanda-SCORE-v5) MIMAT0004748
2195					miRanda-SCORE-v5	2195		ENST00000298838	hsa-miR-939	gene-gene-pos	#NAME?	0.668532	0.668532				FALSE	gene-gene-pos		#NAME?	29763	PACSIN3	MIMAT0004982	hsa-miR-939-5p	29763 (miRanda-SCORE-v5) MIMAT0004982
2196	0.97354				1-PVALUE_OG-v5	2196		ENST00000298838	hsa-miR-939	gene-gene-pos	#NAME?	0.97354					FALSE	gene-gene-pos		#NAME?	29763	PACSIN3	MIMAT0004982	hsa-miR-939-5p	29763 (1-PVALUE_OG-v5) MIMAT0004982
2197	0.992152				1-PVALUE_OG-v5	2197		ENST00000298838	hsa-miR-146a*	gene-gene-pos	#NAME?	0.992152					FALSE	gene-gene-pos		#NAME?	29763	PACSIN3	hsa-miR-146a*	hsa-miR-146a*	29763 (1-PVALUE_OG-v5) hsa-miR-146a*
2198					miRanda-SCORE-v5	2198		ENST00000298838	hsa-miR-146a*	gene-gene-pos	#NAME?	0.635244	0.635244				FALSE	gene-gene-pos		#NAME?	29763	PACSIN3	hsa-miR-146a*	hsa-miR-146a*	29763 (miRanda-SCORE-v5) hsa-miR-146a*
2199	0.993318				1-PVALUE_OG-v5	2199		ENST00000298838	hsa-miR-18b*	gene-gene-pos	#NAME?	0.993318					FALSE	gene-gene-pos		#NAME?	29763	PACSIN3	hsa-miR-18b*	hsa-miR-18b*	29763 (1-PVALUE_OG-v5) hsa-miR-18b*
2200					miRanda-SCORE-v5	2200		ENST00000320602	hsa-miR-335	gene-gene-pos	#NAME?	0.643008	0.643008				FALSE	gene-gene-pos		#NAME?	29801	ZDHHC8	MIMAT0000765	hsa-miR-335-5p	29801 (miRanda-SCORE-v5) MIMAT0000765
2201	0.957816				1-PVALUE_OG-v5	2201		ENST00000320602	hsa-miR-335	gene-gene-pos	#NAME?	0.957816					FALSE	gene-gene-pos		#NAME?	29801	ZDHHC8	MIMAT0000765	hsa-miR-335-5p	29801 (1-PVALUE_OG-v5) MIMAT0000765
2202					miRanda-SCORE-v5	2202		ENST00000366728	hsa-miR-638	gene-gene-pos	#NAME?	0.654512	0.654512				FALSE	gene-gene-pos		#NAME?	2987	GUK1	MIMAT0003308	hsa-miR-638	2987 (miRanda-SCORE-v5) MIMAT0003308
2203	0.968058				1-PVALUE_OG-v5	2203		ENST00000366728	hsa-miR-638	gene-gene-pos	#NAME?	0.968058					FALSE	gene-gene-pos		#NAME?	2987	GUK1	MIMAT0003308	hsa-miR-638	2987 (1-PVALUE_OG-v5) MIMAT0003308
2204					miRanda-SCORE-v5	2204		ENST00000264827	hsa-miR-423-5p	gene-gene-pos	#NAME?	0.714992	0.714992				FALSE	gene-gene-pos		#NAME?	29911	HOOK2	MIMAT0004748	hsa-miR-423-5p	29911 (miRanda-SCORE-v5) MIMAT0004748
2205	0.998535				1-PVALUE_OG-v5	2205		ENST00000264827	hsa-miR-423-5p	gene-gene-pos	#NAME?	0.998535					FALSE	gene-gene-pos		#NAME?	29911	HOOK2	MIMAT0004748	hsa-miR-423-5p	29911 (1-PVALUE_OG-v5) MIMAT0004748
2206	0.994512				1-PVALUE_OG-v5	2206		ENST00000308375	hsa-miR-204	gene-gene-pos	#NAME?	0.994512					FALSE	gene-gene-pos		#NAME?	29925	GMPPB	MIMAT0000265	hsa-miR-204-5p	29925 (1-PVALUE_OG-v5) MIMAT0000265
2207					miRanda-SCORE-v5	2207		ENST00000308375	hsa-miR-204	gene-gene-pos	#NAME?	0.65208	0.65208				FALSE	gene-gene-pos		#NAME?	29925	GMPPB	MIMAT0000265	hsa-miR-204-5p	29925 (miRanda-SCORE-v5) MIMAT0000265
2208	0.957992				1-PVALUE_OG-v5	2208		ENST00000308375	hsa-miR-18b*	gene-gene-pos	#NAME?	0.957992					FALSE	gene-gene-pos		#NAME?	29925	GMPPB	hsa-miR-18b*	hsa-miR-18b*	29925 (1-PVALUE_OG-v5) hsa-miR-18b*
2209					miRanda-SCORE-v5	2209		ENST00000308375	hsa-miR-18b*	gene-gene-pos	#NAME?	0.624076	0.624076				FALSE	gene-gene-pos		#NAME?	29925	GMPPB	hsa-miR-18b*	hsa-miR-18b*	29925 (miRanda-SCORE-v5) hsa-miR-18b*
2210	0.950877				1-PVALUE_OG-v5	2210		ENST00000379697	hsa-miR-423-5p	gene-gene-pos	#NAME?	0.950877					FALSE	gene-gene-pos		#NAME?	30011	SH3KBP1	MIMAT0004748	hsa-miR-423-5p	30011 (1-PVALUE_OG-v5) MIMAT0004748
2211					miRanda-SCORE-v5	2211		ENST00000379697	hsa-miR-423-5p	gene-gene-pos	#NAME?	0.674264	0.674264				FALSE	gene-gene-pos		#NAME?	30011	SH3KBP1	MIMAT0004748	hsa-miR-423-5p	30011 (miRanda-SCORE-v5) MIMAT0004748
2212	0.961328				1-PVALUE_OG-v5	2212		ENST00000375167	hsa-miR-18b*	gene-gene-pos	#NAME?	0.961328					FALSE	gene-gene-pos		#NAME?	3014	H2AFX	hsa-miR-18b*	hsa-miR-18b*	3014 (1-PVALUE_OG-v5) hsa-miR-18b*
2213					miRanda-SCORE-v5	2213		ENST00000375167	hsa-miR-18b*	gene-gene-pos	#NAME?	0.628784	0.628784				FALSE	gene-gene-pos		#NAME?	3014	H2AFX	hsa-miR-18b*	hsa-miR-18b*	3014 (miRanda-SCORE-v5) hsa-miR-18b*
2214	0.999747				1-PVALUE_OG-v5	2214		ENST00000222115	hsa-miR-939	gene-gene-pos	#NAME?	0.999747					FALSE	gene-gene-pos		#NAME?	3036	HAS1	MIMAT0004982	hsa-miR-939-5p	3036 (1-PVALUE_OG-v5) MIMAT0004982
2215					miRanda-SCORE-v5	2215		ENST00000222115	hsa-miR-939	gene-gene-pos	#NAME?	0.752468	0.752468				FALSE	gene-gene-pos		#NAME?	3036	HAS1	MIMAT0004982	hsa-miR-939-5p	3036 (miRanda-SCORE-v5) MIMAT0004982
2216					miRanda-SCORE-v5	2216		ENST00000373142	hsa-miR-423-5p	gene-gene-pos	#NAME?	0.671708	0.671708				FALSE	gene-gene-pos		#NAME?	30815	ST6GALNAC6	MIMAT0004748	hsa-miR-423-5p	30815 (miRanda-SCORE-v5) MIMAT0004748
2217	0.993724				1-PVALUE_OG-v5	2217		ENST00000373142	hsa-miR-423-5p	gene-gene-pos	#NAME?	0.993724					FALSE	gene-gene-pos		#NAME?	30815	ST6GALNAC6	MIMAT0004748	hsa-miR-423-5p	30815 (1-PVALUE_OG-v5) MIMAT0004748
2218	0.960831				1-PVALUE_OG-v5	2218		ENST00000373142	hsa-miR-18b*	gene-gene-pos	#NAME?	0.960831					FALSE	gene-gene-pos		#NAME?	30815	ST6GALNAC6	hsa-miR-18b*	hsa-miR-18b*	30815 (1-PVALUE_OG-v5) hsa-miR-18b*
2219					miRanda-SCORE-v5	2219		ENST00000373142	hsa-miR-18b*	gene-gene-pos	#NAME?	0.627308	0.627308				FALSE	gene-gene-pos		#NAME?	30815	ST6GALNAC6	hsa-miR-18b*	hsa-miR-18b*	30815 (miRanda-SCORE-v5) hsa-miR-18b*
2220	0.981241				1-PVALUE_OG-v5	2220		ENST00000354546	hsa-miR-149*	gene-gene-pos	#NAME?	0.981241					FALSE	gene-gene-pos		#NAME?	309	ANXA6	hsa-miR-149*	hsa-miR-149*	309 (1-PVALUE_OG-v5) hsa-miR-149*
2221					miRanda-SCORE-v5	2221		ENST00000354546	hsa-miR-149*	gene-gene-pos	#NAME?	0.766112	0.766112				FALSE	gene-gene-pos		#NAME?	309	ANXA6	hsa-miR-149*	hsa-miR-149*	309 (miRanda-SCORE-v5) hsa-miR-149*
2222					validated miRTarBase	2222	18185580	317	hsa-miR-335-5p	gene-gene-pos	#NAME?	0.75		18185580			FALSE	gene-gene-pos	18185580	#NAME?	317	APAF1	MIMAT0000765	hsa-miR-335-5p	317 (validated miRTarBase) MIMAT0000765		0.75
2223	0.970861				1-PVALUE_OG-v5	2223		ENST00000330070	hsa-miR-638	gene-gene-pos	#NAME?	0.970861					FALSE	gene-gene-pos		#NAME?	3212	HOXB2	MIMAT0003308	hsa-miR-638	3212 (1-PVALUE_OG-v5) MIMAT0003308
2224					miRanda-SCORE-v5	2224		ENST00000330070	hsa-miR-638	gene-gene-pos	#NAME?	0.658536	0.658536				FALSE	gene-gene-pos		#NAME?	3212	HOXB2	MIMAT0003308	hsa-miR-638	3212 (miRanda-SCORE-v5) MIMAT0003308
2225					validated miRTarBase	2225	18185580	323	hsa-miR-335-5p	gene-gene-pos	#NAME?	0.75		18185580			FALSE	gene-gene-pos	18185580	#NAME?	323	APBB2	MIMAT0000765	hsa-miR-335-5p	323 (validated miRTarBase) MIMAT0000765		0.75
2226					validated miRTarBase	2226	23592263|23706177|24398324	340359	hsa-miR-423-5p	gene-gene-pos	#NAME?	0.75		23592263|23706177|24398324			FALSE	gene-gene-pos	23592263|23706177|24398324	#NAME?	340359	KLHL38	MIMAT0004748	hsa-miR-423-5p	340359 (validated miRTarBase) MIMAT0004748		0.75
2227					validated miRTarBase	2227	18185580	3417	hsa-miR-335-5p	gene-gene-pos	#NAME?	0.75		18185580			FALSE	gene-gene-pos	18185580	#NAME?	3417	IDH1	MIMAT0000765	hsa-miR-335-5p	3417 (validated miRTarBase) MIMAT0000765		0.75
2228	0.961191				1-PVALUE_OG-v5	2228		ENST00000335523	hsa-miR-423-5p	gene-gene-pos	#NAME?	0.961191					FALSE	gene-gene-pos		#NAME?	342865	VSTM2B	MIMAT0004748	hsa-miR-423-5p	342865 (1-PVALUE_OG-v5) MIMAT0004748
2229					miRanda-SCORE-v5	2229		ENST00000335523	hsa-miR-423-5p	gene-gene-pos	#NAME?	0.6816	0.6816				FALSE	gene-gene-pos		#NAME?	342865	VSTM2B	MIMAT0004748	hsa-miR-423-5p	342865 (miRanda-SCORE-v5) MIMAT0004748
2230	0.97326				1-PVALUE_OG-v5	2230		ENST00000339133	hsa-miR-18b*	gene-gene-pos	#NAME?	0.97326					FALSE	gene-gene-pos		#NAME?	342977	NANOS3	hsa-miR-18b*	hsa-miR-18b*	342977 (1-PVALUE_OG-v5) hsa-miR-18b*
2231					miRanda-SCORE-v5	2231		ENST00000339133	hsa-miR-18b*	gene-gene-pos	#NAME?	0.644792	0.644792				FALSE	gene-gene-pos		#NAME?	342977	NANOS3	hsa-miR-18b*	hsa-miR-18b*	342977 (miRanda-SCORE-v5) hsa-miR-18b*
2232					validated miRTarBase	2232	18185580	343450	hsa-miR-335-5p	gene-gene-pos	#NAME?	0.75		18185580			FALSE	gene-gene-pos	18185580	#NAME?	343450	KCNT2	MIMAT0000765	hsa-miR-335-5p	343450 (validated miRTarBase) MIMAT0000765		0.75
2233					miRanda-SCORE-v5	2233		ENST00000301464	hsa-miR-423-5p	gene-gene-pos	#NAME?	0.701416	0.701416				FALSE	gene-gene-pos		#NAME?	3489	IGFBP6	MIMAT0004748	hsa-miR-423-5p	3489 (miRanda-SCORE-v5) MIMAT0004748
2234	0.995749				1-PVALUE_OG-v5	2234		ENST00000301464	hsa-miR-423-5p	gene-gene-pos	#NAME?	0.995749					FALSE	gene-gene-pos		#NAME?	3489	IGFBP6	MIMAT0004748	hsa-miR-423-5p	3489 (1-PVALUE_OG-v5) MIMAT0004748
2235					validated miRTarBase	2235	18185580	352909	hsa-miR-335-5p	gene-gene-pos	#NAME?	0.75		18185580			FALSE	gene-gene-pos	18185580	#NAME?	352909	DNAAF3	MIMAT0000765	hsa-miR-335-5p	352909 (validated miRTarBase) MIMAT0000765		0.75
2236					miRanda-SCORE-v5	2236		ENST00000335552	hsa-miR-335	gene-gene-pos	#NAME?	0.647112	0.647112				FALSE	gene-gene-pos		#NAME?	353288	KRT26	MIMAT0000765	hsa-miR-335-5p	353288 (miRanda-SCORE-v5) MIMAT0000765
2237	0.996155				1-PVALUE_OG-v5	2237		ENST00000335552	hsa-miR-335	gene-gene-pos	#NAME?	0.996155					FALSE	gene-gene-pos		#NAME?	353288	KRT26	MIMAT0000765	hsa-miR-335-5p	353288 (1-PVALUE_OG-v5) MIMAT0000765
2238					validated miRTarBase	2238	18185580	353497	hsa-miR-335-5p	gene-gene-pos	#NAME?	0.75		18185580			FALSE	gene-gene-pos	18185580	#NAME?	353497	POLN	MIMAT0000765	hsa-miR-335-5p	353497 (validated miRTarBase) MIMAT0000765		0.75
2239					validated miRTarBase	2239	20371350	359948	hsa-miR-204-5p	gene-gene-pos	#NAME?	0.75		20371350			FALSE	gene-gene-pos	20371350	#NAME?	359948	IRF2BP2	MIMAT0000265	hsa-miR-204-5p	359948 (validated miRTarBase) MIMAT0000265		0.75
2240					miRanda-SCORE-v5	2240		ENST00000267082	hsa-miR-939	gene-gene-pos	#NAME?	0.671032	0.671032				FALSE	gene-gene-pos		#NAME?	3695	ITGB7	MIMAT0004982	hsa-miR-939-5p	3695 (miRanda-SCORE-v5) MIMAT0004982
2241	0.995542				1-PVALUE_OG-v5	2241		ENST00000267082	hsa-miR-939	gene-gene-pos	#NAME?	0.995542					FALSE	gene-gene-pos		#NAME?	3695	ITGB7	MIMAT0004982	hsa-miR-939-5p	3695 (1-PVALUE_OG-v5) MIMAT0004982
2242					miRanda-SCORE-v5	2242		ENST00000267082	hsa-miR-146a*	gene-gene-pos	#NAME?	0.695864	0.695864				FALSE	gene-gene-pos		#NAME?	3695	ITGB7	hsa-miR-146a*	hsa-miR-146a*	3695 (miRanda-SCORE-v5) hsa-miR-146a*
2243	0.980995				1-PVALUE_OG-v5	2243		ENST00000267082	hsa-miR-146a*	gene-gene-pos	#NAME?	0.980995					FALSE	gene-gene-pos		#NAME?	3695	ITGB7	hsa-miR-146a*	hsa-miR-146a*	3695 (1-PVALUE_OG-v5) hsa-miR-146a*
2244					validated miRTarBase	2244	18185580	3718	hsa-miR-335-5p	gene-gene-pos	#NAME?	0.75		18185580			FALSE	gene-gene-pos	18185580	#NAME?	3718	JAK3	MIMAT0000765	hsa-miR-335-5p	3718 (validated miRTarBase) MIMAT0000765		0.75
2245					validated miRTarBase	2245	18185580	3739	hsa-miR-335-5p	gene-gene-pos	#NAME?	0.75		18185580			FALSE	gene-gene-pos	18185580	#NAME?	3739	KCNA4	MIMAT0000765	hsa-miR-335-5p	3739 (validated miRTarBase) MIMAT0000765		0.75
2246	0.996787				1-PVALUE_OG-v5	2246		ENST00000328224	hsa-miR-767-3p	gene-gene-pos	#NAME?	0.996787					FALSE	gene-gene-pos		#NAME?	3739	KCNA4	MIMAT0003883	hsa-miR-767-3p	3739 (1-PVALUE_OG-v5) MIMAT0003883
2247					miRanda-SCORE-v5	2247		ENST00000328224	hsa-miR-767-3p	gene-gene-pos	#NAME?	0.694312	0.694312				FALSE	gene-gene-pos		#NAME?	3739	KCNA4	MIMAT0003883	hsa-miR-767-3p	3739 (miRanda-SCORE-v5) MIMAT0003883
2248	0.999393				1-PVALUE_OG-v5	2248		ENST00000343035	hsa-miR-939	gene-gene-pos	#NAME?	0.999393					FALSE	gene-gene-pos		#NAME?	390259	BSX	MIMAT0004982	hsa-miR-939-5p	390259 (1-PVALUE_OG-v5) MIMAT0004982
2249					miRanda-SCORE-v5	2249		ENST00000343035	hsa-miR-939	gene-gene-pos	#NAME?	0.670248	0.670248				FALSE	gene-gene-pos		#NAME?	390259	BSX	MIMAT0004982	hsa-miR-939-5p	390259 (miRanda-SCORE-v5) MIMAT0004982
2250					validated miRTarBase	2250	18185580	3932	hsa-miR-335-5p	gene-gene-pos	#NAME?	0.75		18185580			FALSE	gene-gene-pos	18185580	#NAME?	3932	LCK	MIMAT0000765	hsa-miR-335-5p	3932 (validated miRTarBase) MIMAT0000765		0.75
2251					validated miRTarBase	2251	23824327	4076	hsa-miR-204-5p	gene-gene-pos	#NAME?	0.75		23824327			FALSE	gene-gene-pos	23824327	#NAME?	4076	CAPRIN1	MIMAT0000265	hsa-miR-204-5p	4076 (validated miRTarBase) MIMAT0000265		0.75
2252					validated miRTarBase	2252	18185580|23313552	4166	hsa-miR-335-5p	gene-gene-pos	#NAME?	0.75		18185580|23313552			FALSE	gene-gene-pos	18185580|23313552	#NAME?	4166	CHST6	MIMAT0000765	hsa-miR-335-5p	4166 (validated miRTarBase) MIMAT0000765		0.75
2253					miRanda-SCORE-v5	2253		ENST00000300935	hsa-miR-638	gene-gene-pos	#NAME?	0.635436	0.635436				FALSE	gene-gene-pos		#NAME?	4218	RAB8A	MIMAT0003308	hsa-miR-638	4218 (miRanda-SCORE-v5) MIMAT0003308
2254	0.950836				1-PVALUE_OG-v5	2254		ENST00000300935	hsa-miR-638	gene-gene-pos	#NAME?	0.950836					FALSE	gene-gene-pos		#NAME?	4218	RAB8A	MIMAT0003308	hsa-miR-638	4218 (1-PVALUE_OG-v5) MIMAT0003308
2255	0.981626				1-PVALUE_OG-v5	2255		ENST00000268150	hsa-miR-204	gene-gene-pos	#NAME?	0.981626					FALSE	gene-gene-pos		#NAME?	4240	MFGE8	MIMAT0000265	hsa-miR-204-5p	4240 (1-PVALUE_OG-v5) MIMAT0000265
2256					miRanda-SCORE-v5	2256		ENST00000268150	hsa-miR-204	gene-gene-pos	#NAME?	0.715692	0.715692				FALSE	gene-gene-pos		#NAME?	4240	MFGE8	MIMAT0000265	hsa-miR-204-5p	4240 (miRanda-SCORE-v5) MIMAT0000265
2257					validated miRTarBase	2257	18185580	4240	hsa-miR-335-5p	gene-gene-pos	#NAME?	0.75		18185580			FALSE	gene-gene-pos	18185580	#NAME?	4240	MFGE8	MIMAT0000765	hsa-miR-335-5p	4240 (validated miRTarBase) MIMAT0000765		0.75
2258					miRanda-SCORE-v5	2258		ENST00000268150	hsa-miR-638	gene-gene-pos	#NAME?	0.685596	0.685596				FALSE	gene-gene-pos		#NAME?	4240	MFGE8	MIMAT0003308	hsa-miR-638	4240 (miRanda-SCORE-v5) MIMAT0003308
2259	0.999439				1-PVALUE_OG-v5	2259		ENST00000268150	hsa-miR-638	gene-gene-pos	#NAME?	0.999439					FALSE	gene-gene-pos		#NAME?	4240	MFGE8	MIMAT0003308	hsa-miR-638	4240 (1-PVALUE_OG-v5) MIMAT0003308
2260	0.999586				1-PVALUE_OG-v5	2260		ENST00000268150	hsa-miR-767-3p	gene-gene-pos	#NAME?	0.999586					FALSE	gene-gene-pos		#NAME?	4240	MFGE8	MIMAT0003883	hsa-miR-767-3p	4240 (1-PVALUE_OG-v5) MIMAT0003883
2261					miRanda-SCORE-v5	2261		ENST00000268150	hsa-miR-767-3p	gene-gene-pos	#NAME?	0.683216	0.683216				FALSE	gene-gene-pos		#NAME?	4240	MFGE8	MIMAT0003883	hsa-miR-767-3p	4240 (miRanda-SCORE-v5) MIMAT0003883
2262					validated miRTarBase	2262	23622248	4240	hsa-miR-423-5p	gene-gene-pos	#NAME?	0.75		23622248			FALSE	gene-gene-pos	23622248	#NAME?	4240	MFGE8	MIMAT0004748	hsa-miR-423-5p	4240 (validated miRTarBase) MIMAT0004748		0.75
2263	0.998306				1-PVALUE_OG-v5	2263		ENST00000268150	hsa-miR-423-5p	gene-gene-pos	#NAME?	0.998306					FALSE	gene-gene-pos		#NAME?	4240	MFGE8	MIMAT0004748	hsa-miR-423-5p	4240 (1-PVALUE_OG-v5) MIMAT0004748
2264					miRanda-SCORE-v5	2264		ENST00000268150	hsa-miR-423-5p	gene-gene-pos	#NAME?	0.67072	0.67072				FALSE	gene-gene-pos		#NAME?	4240	MFGE8	MIMAT0004748	hsa-miR-423-5p	4240 (miRanda-SCORE-v5) MIMAT0004748
2265	0.999598				1-PVALUE_OG-v5	2265		ENST00000268150	hsa-miR-550	gene-gene-pos	#NAME?	0.999598					FALSE	gene-gene-pos		#NAME?	4240	MFGE8	MIMAT0004800	hsa-miR-550a-5p	4240 (1-PVALUE_OG-v5) MIMAT0004800
2266					miRanda-SCORE-v5	2266		ENST00000268150	hsa-miR-550	gene-gene-pos	#NAME?	0.69988	0.69988				FALSE	gene-gene-pos		#NAME?	4240	MFGE8	MIMAT0004800	hsa-miR-550a-5p	4240 (miRanda-SCORE-v5) MIMAT0004800
2267	0.995597				1-PVALUE_OG-v5	2267		ENST00000268150	hsa-miR-939	gene-gene-pos	#NAME?	0.995597					FALSE	gene-gene-pos		#NAME?	4240	MFGE8	MIMAT0004982	hsa-miR-939-5p	4240 (1-PVALUE_OG-v5) MIMAT0004982
2268					miRanda-SCORE-v5	2268		ENST00000268150	hsa-miR-939	gene-gene-pos	#NAME?	0.692644	0.692644				FALSE	gene-gene-pos		#NAME?	4240	MFGE8	MIMAT0004982	hsa-miR-939-5p	4240 (miRanda-SCORE-v5) MIMAT0004982
2269					miRanda-SCORE-v5	2269		ENST00000268150	hsa-miR-146a*	gene-gene-pos	#NAME?	0.69058	0.69058				FALSE	gene-gene-pos		#NAME?	4240	MFGE8	hsa-miR-146a*	hsa-miR-146a*	4240 (miRanda-SCORE-v5) hsa-miR-146a*
2270	0.978483				1-PVALUE_OG-v5	2270		ENST00000268150	hsa-miR-146a*	gene-gene-pos	#NAME?	0.978483					FALSE	gene-gene-pos		#NAME?	4240	MFGE8	hsa-miR-146a*	hsa-miR-146a*	4240 (1-PVALUE_OG-v5) hsa-miR-146a*
2271	0.981011				1-PVALUE_OG-v5	2271		ENST00000268150	hsa-miR-149*	gene-gene-pos	#NAME?	0.981011					FALSE	gene-gene-pos		#NAME?	4240	MFGE8	hsa-miR-149*	hsa-miR-149*	4240 (1-PVALUE_OG-v5) hsa-miR-149*
2272					miRanda-SCORE-v5	2272		ENST00000268150	hsa-miR-149*	gene-gene-pos	#NAME?	0.765456	0.765456				FALSE	gene-gene-pos		#NAME?	4240	MFGE8	hsa-miR-149*	hsa-miR-149*	4240 (miRanda-SCORE-v5) hsa-miR-149*
2273					miRanda-SCORE-v5	2273		ENST00000268150	hsa-miR-18b*	gene-gene-pos	#NAME?	0.724064	0.724064				FALSE	gene-gene-pos		#NAME?	4240	MFGE8	hsa-miR-18b*	hsa-miR-18b*	4240 (miRanda-SCORE-v5) hsa-miR-18b*
2274	0.995432				1-PVALUE_OG-v5	2274		ENST00000268150	hsa-miR-18b*	gene-gene-pos	#NAME?	0.995432					FALSE	gene-gene-pos		#NAME?	4240	MFGE8	hsa-miR-18b*	hsa-miR-18b*	4240 (1-PVALUE_OG-v5) hsa-miR-18b*
2275					validated miRTarBase	2275	20371350|23592263	4478	hsa-miR-939-5p	gene-gene-pos	#NAME?	0.75		20371350|23592263			FALSE	gene-gene-pos	20371350|23592263	#NAME?	4478	MSN	MIMAT0004982	hsa-miR-939-5p	4478 (validated miRTarBase) MIMAT0004982		0.75
2276					validated miRTarBase	2276	18185580	460	hsa-miR-335-5p	gene-gene-pos	#NAME?	0.75		18185580			FALSE	gene-gene-pos	18185580	#NAME?	460	ASTN1	MIMAT0000765	hsa-miR-335-5p	460 (validated miRTarBase) MIMAT0000765		0.75
2277					validated miRTarBase	2277	18185580	4646	hsa-miR-335-5p	gene-gene-pos	#NAME?	0.75		18185580			FALSE	gene-gene-pos	18185580	#NAME?	4646	MYO6	MIMAT0000765	hsa-miR-335-5p	4646 (validated miRTarBase) MIMAT0000765		0.75
2278	0.952008				1-PVALUE_OG-v5	2278		ENST00000368680	hsa-miR-767-3p	gene-gene-pos	#NAME?	0.952008					FALSE	gene-gene-pos		#NAME?	4881	NPR1	MIMAT0003883	hsa-miR-767-3p	4881 (1-PVALUE_OG-v5) MIMAT0003883
2279					miRanda-SCORE-v5	2279		ENST00000368680	hsa-miR-767-3p	gene-gene-pos	#NAME?	0.631908	0.631908				FALSE	gene-gene-pos		#NAME?	4881	NPR1	MIMAT0003883	hsa-miR-767-3p	4881 (miRanda-SCORE-v5) MIMAT0003883
2280	0.972079				1-PVALUE_OG-v5	2280		ENST00000368680	hsa-miR-550	gene-gene-pos	#NAME?	0.972079					FALSE	gene-gene-pos		#NAME?	4881	NPR1	MIMAT0004800	hsa-miR-550a-5p	4881 (1-PVALUE_OG-v5) MIMAT0004800
2281					miRanda-SCORE-v5	2281		ENST00000368680	hsa-miR-550	gene-gene-pos	#NAME?	0.66982	0.66982				FALSE	gene-gene-pos		#NAME?	4881	NPR1	MIMAT0004800	hsa-miR-550a-5p	4881 (miRanda-SCORE-v5) MIMAT0004800
2282					validated miRTarBase	2282	23446348	4881	hsa-miR-550a-5p	gene-gene-pos	#NAME?	0.75		23446348			FALSE	gene-gene-pos	23446348	#NAME?	4881	NPR1	MIMAT0004800	hsa-miR-550a-5p	4881 (validated miRTarBase) MIMAT0004800		0.75
2283	0.99875				1-PVALUE_OG-v5	2283		ENST00000342694	hsa-miR-149*	gene-gene-pos	#NAME?	0.99875					FALSE	gene-gene-pos		#NAME?	4882	NPR2	hsa-miR-149*	hsa-miR-149*	4882 (1-PVALUE_OG-v5) hsa-miR-149*
2284					miRanda-SCORE-v5	2284		ENST00000342694	hsa-miR-149*	gene-gene-pos	#NAME?	0.74986	0.74986				FALSE	gene-gene-pos		#NAME?	4882	NPR2	hsa-miR-149*	hsa-miR-149*	4882 (miRanda-SCORE-v5) hsa-miR-149*
2285					validated miRTarBase	2285	18185580	4926	hsa-miR-335-5p	gene-gene-pos	#NAME?	0.75		18185580			FALSE	gene-gene-pos	18185580	#NAME?	4926	NUMA1	MIMAT0000765	hsa-miR-335-5p	4926 (validated miRTarBase) MIMAT0000765		0.75
2286	0.986191				1-PVALUE_OG-v5	2286		ENST00000324932	hsa-miR-146a*	gene-gene-pos	#NAME?	0.986191					FALSE	gene-gene-pos		#NAME?	4928	NUP98	hsa-miR-146a*	hsa-miR-146a*	4928 (1-PVALUE_OG-v5) hsa-miR-146a*
2287					miRanda-SCORE-v5	2287		ENST00000324932	hsa-miR-146a*	gene-gene-pos	#NAME?	0.651092	0.651092				FALSE	gene-gene-pos		#NAME?	4928	NUP98	hsa-miR-146a*	hsa-miR-146a*	4928 (miRanda-SCORE-v5) hsa-miR-146a*
2288	0.999469				1-PVALUE_OG-v5	2288		ENST00000322122	hsa-miR-767-3p	gene-gene-pos	#NAME?	0.999469					FALSE	gene-gene-pos		#NAME?	493829	TRIM72	MIMAT0003883	hsa-miR-767-3p	493829 (1-PVALUE_OG-v5) MIMAT0003883
2289					miRanda-SCORE-v5	2289		ENST00000322122	hsa-miR-767-3p	gene-gene-pos	#NAME?	0.6646	0.6646				FALSE	gene-gene-pos		#NAME?	493829	TRIM72	MIMAT0003883	hsa-miR-767-3p	493829 (miRanda-SCORE-v5) MIMAT0003883
2290					validated miRTarBase	2290	18185580	493	hsa-miR-335-5p	gene-gene-pos	#NAME?	0.75		18185580			FALSE	gene-gene-pos	18185580	#NAME?	493	ATP2B4	MIMAT0000765	hsa-miR-335-5p	493 (validated miRTarBase) MIMAT0000765		0.75
2291					validated miRTarBase	2291	23622248	493	hsa-miR-423-5p	gene-gene-pos	#NAME?	0.75		23622248			FALSE	gene-gene-pos	23622248	#NAME?	493	ATP2B4	MIMAT0004748	hsa-miR-423-5p	493 (validated miRTarBase) MIMAT0004748		0.75
2292					validated miRTarBase	2292	23824327	494470	hsa-miR-423-5p	gene-gene-pos	#NAME?	0.75		23824327			FALSE	gene-gene-pos	23824327	#NAME?	494470	RNF165	MIMAT0004748	hsa-miR-423-5p	494470 (validated miRTarBase) MIMAT0004748		0.75
2293	0.998077				1-PVALUE_OG-v5	2293		ENST00000234961	hsa-miR-146a*	gene-gene-pos	#NAME?	0.998077					FALSE	gene-gene-pos		#NAME?	4985	OPRD1	hsa-miR-146a*	hsa-miR-146a*	4985 (1-PVALUE_OG-v5) hsa-miR-146a*
2294					miRanda-SCORE-v5	2294		ENST00000234961	hsa-miR-146a*	gene-gene-pos	#NAME?	0.66268	0.66268				FALSE	gene-gene-pos		#NAME?	4985	OPRD1	hsa-miR-146a*	hsa-miR-146a*	4985 (miRanda-SCORE-v5) hsa-miR-146a*
2295					miRanda-SCORE-v5	2295		ENST00000234961	hsa-miR-18b*	gene-gene-pos	#NAME?	0.60124	0.60124				FALSE	gene-gene-pos		#NAME?	4985	OPRD1	hsa-miR-18b*	hsa-miR-18b*	4985 (miRanda-SCORE-v5) hsa-miR-18b*
2296	0.997475				1-PVALUE_OG-v5	2296		ENST00000234961	hsa-miR-18b*	gene-gene-pos	#NAME?	0.997475					FALSE	gene-gene-pos		#NAME?	4985	OPRD1	hsa-miR-18b*	hsa-miR-18b*	4985 (1-PVALUE_OG-v5) hsa-miR-18b*
2297					validated miRTarBase	2297	18185580	5016	hsa-miR-335-5p	gene-gene-pos	#NAME?	0.75		18185580			FALSE	gene-gene-pos	18185580	#NAME?	5016	OVGP1	MIMAT0000765	hsa-miR-335-5p	5016 (validated miRTarBase) MIMAT0000765		0.75
2298	0.970599				1-PVALUE_OG-v5	2298		ENST00000268171	hsa-miR-18b*	gene-gene-pos	#NAME?	0.970599					FALSE	gene-gene-pos		#NAME?	5045	FURIN	hsa-miR-18b*	hsa-miR-18b*	5045 (1-PVALUE_OG-v5) hsa-miR-18b*
2299					validated miRTarBase	2299	18185580	5053	hsa-miR-335-5p	gene-gene-pos	#NAME?	0.75		18185580			FALSE	gene-gene-pos	18185580	#NAME?	5053	PAH	MIMAT0000765	hsa-miR-335-5p	5053 (validated miRTarBase) MIMAT0000765		0.75
2300					miRanda-SCORE-v5	2300		ENST00000303577	hsa-miR-638	gene-gene-pos	#NAME?	0.658996	0.658996				FALSE	gene-gene-pos		#NAME?	5093	PCBP1	MIMAT0003308	hsa-miR-638	5093 (miRanda-SCORE-v5) MIMAT0003308
2301	0.999558				1-PVALUE_OG-v5	2301		ENST00000303577	hsa-miR-638	gene-gene-pos	#NAME?	0.999558					FALSE	gene-gene-pos		#NAME?	5093	PCBP1	MIMAT0003308	hsa-miR-638	5093 (1-PVALUE_OG-v5) MIMAT0003308
2302					validated miRTarBase	2302	23622248	5093	hsa-miR-423-5p	gene-gene-pos	#NAME?	0.75		23622248			FALSE	gene-gene-pos	23622248	#NAME?	5093	PCBP1	MIMAT0004748	hsa-miR-423-5p	5093 (validated miRTarBase) MIMAT0004748		0.75
2303					miRanda-SCORE-v5	2303		ENST00000360001	hsa-miR-638	gene-gene-pos	#NAME?	0.640168	0.640168				FALSE	gene-gene-pos		#NAME?	51150	SDF4	MIMAT0003308	hsa-miR-638	51150 (miRanda-SCORE-v5) MIMAT0003308
2304	0.955791				1-PVALUE_OG-v5	2304		ENST00000360001	hsa-miR-638	gene-gene-pos	#NAME?	0.955791					FALSE	gene-gene-pos		#NAME?	51150	SDF4	MIMAT0003308	hsa-miR-638	51150 (1-PVALUE_OG-v5) MIMAT0003308
2305	0.973672				1-PVALUE_OG-v5	2305		ENST00000330263	hsa-miR-638	gene-gene-pos	#NAME?	0.973672					FALSE	gene-gene-pos		#NAME?	51154	MRTO4	MIMAT0003308	hsa-miR-638	51154 (1-PVALUE_OG-v5) MIMAT0003308
2306					miRanda-SCORE-v5	2306		ENST00000330263	hsa-miR-638	gene-gene-pos	#NAME?	0.662968	0.662968				FALSE	gene-gene-pos		#NAME?	51154	MRTO4	MIMAT0003308	hsa-miR-638	51154 (miRanda-SCORE-v5) MIMAT0003308
2307	0.99988				1-PVALUE_OG-v5	2307		ENST00000374454	hsa-miR-423-5p	gene-gene-pos	#NAME?	0.99988					FALSE	gene-gene-pos		#NAME?	51248	PDZD11	MIMAT0004748	hsa-miR-423-5p	51248 (1-PVALUE_OG-v5) MIMAT0004748
2308					miRanda-SCORE-v5	2308		ENST00000374454	hsa-miR-423-5p	gene-gene-pos	#NAME?	0.764768	0.764768				FALSE	gene-gene-pos		#NAME?	51248	PDZD11	MIMAT0004748	hsa-miR-423-5p	51248 (miRanda-SCORE-v5) MIMAT0004748
2309					miRanda-SCORE-v5	2309		ENST00000374454	hsa-miR-146a*	gene-gene-pos	#NAME?	0.700412	0.700412				FALSE	gene-gene-pos		#NAME?	51248	PDZD11	hsa-miR-146a*	hsa-miR-146a*	51248 (miRanda-SCORE-v5) hsa-miR-146a*
2310	0.982926				1-PVALUE_OG-v5	2310		ENST00000374454	hsa-miR-146a*	gene-gene-pos	#NAME?	0.982926					FALSE	gene-gene-pos		#NAME?	51248	PDZD11	hsa-miR-146a*	hsa-miR-146a*	51248 (1-PVALUE_OG-v5) hsa-miR-146a*
2311	0.950415				1-PVALUE_OG-v5	2311		ENST00000374454	hsa-miR-149*	gene-gene-pos	#NAME?	0.950415					FALSE	gene-gene-pos		#NAME?	51248	PDZD11	hsa-miR-149*	hsa-miR-149*	51248 (1-PVALUE_OG-v5) hsa-miR-149*
2312					miRanda-SCORE-v5	2312		ENST00000374454	hsa-miR-149*	gene-gene-pos	#NAME?	0.71328	0.71328				FALSE	gene-gene-pos		#NAME?	51248	PDZD11	hsa-miR-149*	hsa-miR-149*	51248 (miRanda-SCORE-v5) hsa-miR-149*
2313					validated miRTarBase	2313	18185580	51676	hsa-miR-335-5p	gene-gene-pos	#NAME?	0.75		18185580			FALSE	gene-gene-pos	18185580	#NAME?	51676	ASB2	MIMAT0000765	hsa-miR-335-5p	51676 (validated miRTarBase) MIMAT0000765		0.75
2314					miRanda-SCORE-v5	2314		ENST00000315988	hsa-miR-767-3p	gene-gene-pos	#NAME?	0.643236	0.643236				FALSE	gene-gene-pos		#NAME?	51676	ASB2	MIMAT0003883	hsa-miR-767-3p	51676 (miRanda-SCORE-v5) MIMAT0003883
2315	0.998657				1-PVALUE_OG-v5	2315		ENST00000315988	hsa-miR-767-3p	gene-gene-pos	#NAME?	0.998657					FALSE	gene-gene-pos		#NAME?	51676	ASB2	MIMAT0003883	hsa-miR-767-3p	51676 (1-PVALUE_OG-v5) MIMAT0003883
2316					miRanda-SCORE-v5	2316		ENST00000315988	hsa-miR-423-5p	gene-gene-pos	#NAME?	0.720424	0.720424				FALSE	gene-gene-pos		#NAME?	51676	ASB2	MIMAT0004748	hsa-miR-423-5p	51676 (miRanda-SCORE-v5) MIMAT0004748
2317	0.994773				1-PVALUE_OG-v5	2317		ENST00000315988	hsa-miR-423-5p	gene-gene-pos	#NAME?	0.994773					FALSE	gene-gene-pos		#NAME?	51676	ASB2	MIMAT0004748	hsa-miR-423-5p	51676 (1-PVALUE_OG-v5) MIMAT0004748
2318	0.966934				1-PVALUE_OG-v5	2318		ENST00000315988	hsa-miR-146a*	gene-gene-pos	#NAME?	0.966934					FALSE	gene-gene-pos		#NAME?	51676	ASB2	hsa-miR-146a*	hsa-miR-146a*	51676 (1-PVALUE_OG-v5) hsa-miR-146a*
2319					miRanda-SCORE-v5	2319		ENST00000315988	hsa-miR-146a*	gene-gene-pos	#NAME?	0.672168	0.672168				FALSE	gene-gene-pos		#NAME?	51676	ASB2	hsa-miR-146a*	hsa-miR-146a*	51676 (miRanda-SCORE-v5) hsa-miR-146a*
2320					validated miRTarBase	2320	18185580	51752	hsa-miR-335-5p	gene-gene-pos	#NAME?	0.75		18185580			FALSE	gene-gene-pos	18185580	#NAME?	51752	ERAP1	MIMAT0000765	hsa-miR-335-5p	51752 (validated miRTarBase) MIMAT0000765		0.75
2321	0.99669				1-PVALUE_OG-v5	2321		ENST00000379785	hsa-miR-767-3p	gene-gene-pos	#NAME?	0.99669					FALSE	gene-gene-pos		#NAME?	5209	PFKFB3	MIMAT0003883	hsa-miR-767-3p	5209 (1-PVALUE_OG-v5) MIMAT0003883
2322					miRanda-SCORE-v5	2322		ENST00000379785	hsa-miR-767-3p	gene-gene-pos	#NAME?	0.63806	0.63806				FALSE	gene-gene-pos		#NAME?	5209	PFKFB3	MIMAT0003883	hsa-miR-767-3p	5209 (miRanda-SCORE-v5) MIMAT0003883
2323					validated miRTarBase	2323	23592263	5209	hsa-miR-423-5p	gene-gene-pos	#NAME?	0.75		23592263			FALSE	gene-gene-pos	23592263	#NAME?	5209	PFKFB3	MIMAT0004748	hsa-miR-423-5p	5209 (validated miRTarBase) MIMAT0004748		0.75
2324					miRanda-SCORE-v5	2324		ENST00000381125	hsa-miR-767-3p	gene-gene-pos	#NAME?	0.710464	0.710464				FALSE	gene-gene-pos		#NAME?	5214	PFKP	MIMAT0003883	hsa-miR-767-3p	5214 (miRanda-SCORE-v5) MIMAT0003883
2325	0.99642				1-PVALUE_OG-v5	2325		ENST00000381125	hsa-miR-767-3p	gene-gene-pos	#NAME?	0.99642					FALSE	gene-gene-pos		#NAME?	5214	PFKP	MIMAT0003883	hsa-miR-767-3p	5214 (1-PVALUE_OG-v5) MIMAT0003883
2326					miRanda-SCORE-v5	2326		ENST00000328273	hsa-miR-204	gene-gene-pos	#NAME?	0.650384	0.650384				FALSE	gene-gene-pos		#NAME?	5261	PHKG2	MIMAT0000265	hsa-miR-204-5p	5261 (miRanda-SCORE-v5) MIMAT0000265
2327	0.999372				1-PVALUE_OG-v5	2327		ENST00000328273	hsa-miR-204	gene-gene-pos	#NAME?	0.999372					FALSE	gene-gene-pos		#NAME?	5261	PHKG2	MIMAT0000265	hsa-miR-204-5p	5261 (1-PVALUE_OG-v5) MIMAT0000265
2328	0.955304				1-PVALUE_OG-v5	2328		ENST00000328273	hsa-miR-423-5p	gene-gene-pos	#NAME?	0.955304					FALSE	gene-gene-pos		#NAME?	5261	PHKG2	MIMAT0004748	hsa-miR-423-5p	5261 (1-PVALUE_OG-v5) MIMAT0004748
2329					miRanda-SCORE-v5	2329		ENST00000328273	hsa-miR-423-5p	gene-gene-pos	#NAME?	0.678788	0.678788				FALSE	gene-gene-pos		#NAME?	5261	PHKG2	MIMAT0004748	hsa-miR-423-5p	5261 (miRanda-SCORE-v5) MIMAT0004748
2330					validated miRTarBase	2330	23622248	5315	hsa-miR-423-5p	gene-gene-pos	#NAME?	0.75		23622248			FALSE	gene-gene-pos	23622248	#NAME?	5315	PKM	MIMAT0004748	hsa-miR-423-5p	5315 (validated miRTarBase) MIMAT0004748		0.75
2331	0.998291				1-PVALUE_OG-v5	2331		ENST00000319622	hsa-miR-423-5p	gene-gene-pos	#NAME?	0.998291					FALSE	gene-gene-pos		#NAME?	5315	PKM	MIMAT0004748	hsa-miR-423-5p	5315 (1-PVALUE_OG-v5) MIMAT0004748
2332					miRanda-SCORE-v5	2332		ENST00000319622	hsa-miR-423-5p	gene-gene-pos	#NAME?	0.66634	0.66634				FALSE	gene-gene-pos		#NAME?	5315	PKM	MIMAT0004748	hsa-miR-423-5p	5315 (miRanda-SCORE-v5) MIMAT0004748
2333					miRanda-SCORE-v5	2333		ENST00000319622	hsa-miR-18b*	gene-gene-pos	#NAME?	0.677952	0.677952				FALSE	gene-gene-pos		#NAME?	5315	PKM	hsa-miR-18b*	hsa-miR-18b*	5315 (miRanda-SCORE-v5) hsa-miR-18b*
2334	0.987088				1-PVALUE_OG-v5	2334		ENST00000319622	hsa-miR-18b*	gene-gene-pos	#NAME?	0.987088					FALSE	gene-gene-pos		#NAME?	5315	PKM	hsa-miR-18b*	hsa-miR-18b*	5315 (1-PVALUE_OG-v5) hsa-miR-18b*
2335					miRanda-SCORE-v5	2335		ENST00000352845	hsa-miR-767-3p	gene-gene-pos	#NAME?	0.673088	0.673088				FALSE	gene-gene-pos		#NAME?	5317	PKP1	MIMAT0003883	hsa-miR-767-3p	5317 (miRanda-SCORE-v5) MIMAT0003883
2336	0.973602				1-PVALUE_OG-v5	2336		ENST00000352845	hsa-miR-767-3p	gene-gene-pos	#NAME?	0.973602					FALSE	gene-gene-pos		#NAME?	5317	PKP1	MIMAT0003883	hsa-miR-767-3p	5317 (1-PVALUE_OG-v5) MIMAT0003883
2337					validated miRTarBase	2337	21282569	5329	hsa-miR-204-5p	gene-gene-pos	#NAME?	0.75		21282569			FALSE	gene-gene-pos	21282569	#NAME?	5329	PLAUR	MIMAT0000265	hsa-miR-204-5p	5329 (validated miRTarBase) MIMAT0000265		0.75
2338	0.996875				1-PVALUE_OG-v5	2338		ENST00000339082	hsa-miR-550	gene-gene-pos	#NAME?	0.996875					FALSE	gene-gene-pos		#NAME?	5329	PLAUR	MIMAT0004800	hsa-miR-550a-5p	5329 (1-PVALUE_OG-v5) MIMAT0004800
2339					miRanda-SCORE-v5	2339		ENST00000339082	hsa-miR-550	gene-gene-pos	#NAME?	0.634032	0.634032				FALSE	gene-gene-pos		#NAME?	5329	PLAUR	MIMAT0004800	hsa-miR-550a-5p	5329 (miRanda-SCORE-v5) MIMAT0004800
2340	0.957592				1-PVALUE_OG-v5	2340		ENST00000221264	hsa-miR-939	gene-gene-pos	#NAME?	0.957592					FALSE	gene-gene-pos		#NAME?	5329	PLAUR	MIMAT0004982	hsa-miR-939-5p	5329 (1-PVALUE_OG-v5) MIMAT0004982
2341					miRanda-SCORE-v5	2341		ENST00000221264	hsa-miR-939	gene-gene-pos	#NAME?	0.70446	0.70446				FALSE	gene-gene-pos		#NAME?	5329	PLAUR	MIMAT0004982	hsa-miR-939-5p	5329 (miRanda-SCORE-v5) MIMAT0004982
2342					miRanda-SCORE-v5	2342		ENST00000325234	hsa-miR-939	gene-gene-pos	#NAME?	0.702556	0.702556				FALSE	gene-gene-pos		#NAME?	5331	PLCB3	MIMAT0004982	hsa-miR-939-5p	5331 (miRanda-SCORE-v5) MIMAT0004982
2343	0.955981				1-PVALUE_OG-v5	2343		ENST00000325234	hsa-miR-939	gene-gene-pos	#NAME?	0.955981					FALSE	gene-gene-pos		#NAME?	5331	PLCB3	MIMAT0004982	hsa-miR-939-5p	5331 (1-PVALUE_OG-v5) MIMAT0004982
2344					miRanda-SCORE-v5	2344		ENST00000325234	hsa-miR-146a*	gene-gene-pos	#NAME?	0.723152	0.723152				FALSE	gene-gene-pos		#NAME?	5331	PLCB3	hsa-miR-146a*	hsa-miR-146a*	5331 (miRanda-SCORE-v5) hsa-miR-146a*
2345	0.993065				1-PVALUE_OG-v5	2345		ENST00000279230	hsa-miR-146a*	gene-gene-pos	#NAME?	0.993065					FALSE	gene-gene-pos		#NAME?	5331	PLCB3	hsa-miR-146a*	hsa-miR-146a*	5331 (1-PVALUE_OG-v5) hsa-miR-146a*
2346	0.999486				1-PVALUE_OG-v5	2346		ENST00000325234	hsa-miR-18b*	gene-gene-pos	#NAME?	0.999486					FALSE	gene-gene-pos		#NAME?	5331	PLCB3	hsa-miR-18b*	hsa-miR-18b*	5331 (1-PVALUE_OG-v5) hsa-miR-18b*
2347					miRanda-SCORE-v5	2347		ENST00000325234	hsa-miR-18b*	gene-gene-pos	#NAME?	0.63674	0.63674				FALSE	gene-gene-pos		#NAME?	5331	PLCB3	hsa-miR-18b*	hsa-miR-18b*	5331 (miRanda-SCORE-v5) hsa-miR-18b*
2348					validated miRTarBase	2348	18185580	5333	hsa-miR-335-5p	gene-gene-pos	#NAME?	0.75		18185580			FALSE	gene-gene-pos	18185580	#NAME?	5333	PLCD1	MIMAT0000765	hsa-miR-335-5p	5333 (validated miRTarBase) MIMAT0000765		0.75
2349					validated miRTarBase	2349	18185580	53358	hsa-miR-335-5p	gene-gene-pos	#NAME?	0.75		18185580			FALSE	gene-gene-pos	18185580	#NAME?	53358	SHC3	MIMAT0000765	hsa-miR-335-5p	53358 (validated miRTarBase) MIMAT0000765		0.75
2350	0.989063				1-PVALUE_OG-v5	2350		ENST00000233944	hsa-miR-146a*	gene-gene-pos	#NAME?	0.989063					FALSE	gene-gene-pos		#NAME?	53632	PRKAG3	hsa-miR-146a*	hsa-miR-146a*	53632 (1-PVALUE_OG-v5) hsa-miR-146a*
2351					miRanda-SCORE-v5	2351		ENST00000233944	hsa-miR-146a*	gene-gene-pos	#NAME?	0.719244	0.719244				FALSE	gene-gene-pos		#NAME?	53632	PRKAG3	hsa-miR-146a*	hsa-miR-146a*	53632 (miRanda-SCORE-v5) hsa-miR-146a*
2352					miRanda-SCORE-v5	2352		ENST00000301908	hsa-miR-550	gene-gene-pos	#NAME?	0.630808	0.630808				FALSE	gene-gene-pos		#NAME?	5368	PNOC	MIMAT0004800	hsa-miR-550a-5p	5368 (miRanda-SCORE-v5) MIMAT0004800
2353	0.971714				1-PVALUE_OG-v5	2353		ENST00000301908	hsa-miR-550	gene-gene-pos	#NAME?	0.971714					FALSE	gene-gene-pos		#NAME?	5368	PNOC	MIMAT0004800	hsa-miR-550a-5p	5368 (1-PVALUE_OG-v5) MIMAT0004800
2354					validated miRTarBase	2354	22012620	53904	hsa-miR-550a-5p	gene-gene-pos	#NAME?	0.75		22012620			FALSE	gene-gene-pos	22012620	#NAME?	53904	MYO3A	MIMAT0004800	hsa-miR-550a-5p	53904 (validated miRTarBase) MIMAT0004800		0.75
2355					miRanda-SCORE-v5	2355		ENST00000265944	hsa-miR-550	gene-gene-pos	#NAME?	0.695324	0.695324				FALSE	gene-gene-pos		#NAME?	53904	MYO3A	MIMAT0004800	hsa-miR-550a-5p	53904 (miRanda-SCORE-v5) MIMAT0004800
2356	0.999999				1-PVALUE_OG-v5	2356		ENST00000265944	hsa-miR-550	gene-gene-pos	#NAME?	0.999999					FALSE	gene-gene-pos		#NAME?	53904	MYO3A	MIMAT0004800	hsa-miR-550a-5p	53904 (1-PVALUE_OG-v5) MIMAT0004800
2357					miRanda-SCORE-v5	2357		ENST00000216832	hsa-miR-335	gene-gene-pos	#NAME?	0.644904	0.644904				FALSE	gene-gene-pos		#NAME?	5411	PNN	MIMAT0000765	hsa-miR-335-5p	5411 (miRanda-SCORE-v5) MIMAT0000765
2358	0.98319				1-PVALUE_OG-v5	2358		ENST00000216832	hsa-miR-335	gene-gene-pos	#NAME?	0.98319					FALSE	gene-gene-pos		#NAME?	5411	PNN	MIMAT0000765	hsa-miR-335-5p	5411 (1-PVALUE_OG-v5) MIMAT0000765
2359					validated miRTarBase	2359	18185580	54467	hsa-miR-335-5p	gene-gene-pos	#NAME?	0.75		18185580			FALSE	gene-gene-pos	18185580	#NAME?	54467	ANKIB1	MIMAT0000765	hsa-miR-335-5p	54467 (validated miRTarBase) MIMAT0000765		0.75
2360	0.990766				1-PVALUE_OG-v5	2360		ENST00000265742	hsa-miR-550	gene-gene-pos	#NAME?	0.990766					FALSE	gene-gene-pos		#NAME?	54467	ANKIB1	MIMAT0004800	hsa-miR-550a-5p	54467 (1-PVALUE_OG-v5) MIMAT0004800
2361					miRanda-SCORE-v5	2361		ENST00000265742	hsa-miR-550	gene-gene-pos	#NAME?	0.651544	0.651544				FALSE	gene-gene-pos		#NAME?	54467	ANKIB1	MIMAT0004800	hsa-miR-550a-5p	54467 (miRanda-SCORE-v5) MIMAT0004800
2362	0.956075				1-PVALUE_OG-v5	2362		ENST00000184183	hsa-miR-335	gene-gene-pos	#NAME?	0.956075					FALSE	gene-gene-pos		#NAME?	54763	ROPN1	MIMAT0000765	hsa-miR-335-5p	54763 (1-PVALUE_OG-v5) MIMAT0000765
2363					miRanda-SCORE-v5	2363		ENST00000184183	hsa-miR-335	gene-gene-pos	#NAME?	0.641228	0.641228				FALSE	gene-gene-pos		#NAME?	54763	ROPN1	MIMAT0000765	hsa-miR-335-5p	54763 (miRanda-SCORE-v5) MIMAT0000765
2364	0.997168				1-PVALUE_OG-v5	2364		ENST00000306442	hsa-miR-204	gene-gene-pos	#NAME?	0.997168					FALSE	gene-gene-pos		#NAME?	5480	PPIC	MIMAT0000265	hsa-miR-204-5p	5480 (1-PVALUE_OG-v5) MIMAT0000265
2365					miRanda-SCORE-v5	2365		ENST00000306442	hsa-miR-204	gene-gene-pos	#NAME?	0.692592	0.692592				FALSE	gene-gene-pos		#NAME?	5480	PPIC	MIMAT0000265	hsa-miR-204-5p	5480 (miRanda-SCORE-v5) MIMAT0000265
2366	0.973506				1-PVALUE_OG-v5	2366		ENST00000260382	hsa-miR-146a*	gene-gene-pos	#NAME?	0.973506					FALSE	gene-gene-pos		#NAME?	54839	LRRC49	hsa-miR-146a*	hsa-miR-146a*	54839 (1-PVALUE_OG-v5) hsa-miR-146a*
2367					miRanda-SCORE-v5	2367		ENST00000260382	hsa-miR-146a*	gene-gene-pos	#NAME?	0.681692	0.681692				FALSE	gene-gene-pos		#NAME?	54839	LRRC49	hsa-miR-146a*	hsa-miR-146a*	54839 (miRanda-SCORE-v5) hsa-miR-146a*
2368					validated miRTarBase	2368	18185580	5493	hsa-miR-335-5p	gene-gene-pos	#NAME?	0.75		18185580			FALSE	gene-gene-pos	18185580	#NAME?	5493	PPL	MIMAT0000765	hsa-miR-335-5p	5493 (validated miRTarBase) MIMAT0000765		0.75
2369	0.992171				1-PVALUE_OG-v5	2369		ENST00000314399	hsa-miR-939	gene-gene-pos	#NAME?	0.992171					FALSE	gene-gene-pos		#NAME?	54943	DNAJC28	MIMAT0004982	hsa-miR-939-5p	54943 (1-PVALUE_OG-v5) MIMAT0004982
2370					miRanda-SCORE-v5	2370		ENST00000314399	hsa-miR-939	gene-gene-pos	#NAME?	0.680032	0.680032				FALSE	gene-gene-pos		#NAME?	54943	DNAJC28	MIMAT0004982	hsa-miR-939-5p	54943 (miRanda-SCORE-v5) MIMAT0004982
2371					miRanda-SCORE-v5	2371		ENST00000376745	hsa-miR-767-3p	gene-gene-pos	#NAME?	0.695076	0.695076				FALSE	gene-gene-pos		#NAME?	5499	PPP1CA	MIMAT0003883	hsa-miR-767-3p	5499 (miRanda-SCORE-v5) MIMAT0003883
2372	0.998483				1-PVALUE_OG-v5	2372		ENST00000376745	hsa-miR-767-3p	gene-gene-pos	#NAME?	0.998483					FALSE	gene-gene-pos		#NAME?	5499	PPP1CA	MIMAT0003883	hsa-miR-767-3p	5499 (1-PVALUE_OG-v5) MIMAT0003883
2373					validated miRTarBase	2373	23824327	55020	hsa-miR-204-5p	gene-gene-pos	#NAME?	0.75		23824327			FALSE	gene-gene-pos	23824327	#NAME?	55020	TTC38	MIMAT0000265	hsa-miR-204-5p	55020 (validated miRTarBase) MIMAT0000265		0.75
2374	0.965232				1-PVALUE_OG-v5	2374		ENST00000381031	hsa-miR-18b*	gene-gene-pos	#NAME?	0.965232					FALSE	gene-gene-pos		#NAME?	55020	TTC38	hsa-miR-18b*	hsa-miR-18b*	55020 (1-PVALUE_OG-v5) hsa-miR-18b*
2375					miRanda-SCORE-v5	2375		ENST00000381031	hsa-miR-18b*	gene-gene-pos	#NAME?	0.632792	0.632792				FALSE	gene-gene-pos		#NAME?	55020	TTC38	hsa-miR-18b*	hsa-miR-18b*	55020 (miRanda-SCORE-v5) hsa-miR-18b*
2376					miRanda-SCORE-v5	2376		ENST00000299192	hsa-miR-204	gene-gene-pos	#NAME?	0.713264	0.713264				FALSE	gene-gene-pos		#NAME?	55027	HEATR3	MIMAT0000265	hsa-miR-204-5p	55027 (miRanda-SCORE-v5) MIMAT0000265
2377	0.980666				1-PVALUE_OG-v5	2377		ENST00000299192	hsa-miR-204	gene-gene-pos	#NAME?	0.980666					FALSE	gene-gene-pos		#NAME?	55027	HEATR3	MIMAT0000265	hsa-miR-204-5p	55027 (1-PVALUE_OG-v5) MIMAT0000265
2378					miRanda-SCORE-v5	2378		ENST00000299192	hsa-miR-638	gene-gene-pos	#NAME?	0.746784	0.746784				FALSE	gene-gene-pos		#NAME?	55027	HEATR3	MIMAT0003308	hsa-miR-638	55027 (miRanda-SCORE-v5) MIMAT0003308
2379	0.99626				1-PVALUE_OG-v5	2379		ENST00000299192	hsa-miR-638	gene-gene-pos	#NAME?	0.99626					FALSE	gene-gene-pos		#NAME?	55027	HEATR3	MIMAT0003308	hsa-miR-638	55027 (1-PVALUE_OG-v5) MIMAT0003308
2380					validated miRTarBase	2380	18185580	55034	hsa-miR-335-5p	gene-gene-pos	#NAME?	0.75		18185580			FALSE	gene-gene-pos	18185580	#NAME?	55034	MOCOS	MIMAT0000765	hsa-miR-335-5p	55034 (validated miRTarBase) MIMAT0000765		0.75
2381					validated miRTarBase	2381	18185580	55112	hsa-miR-335-5p	gene-gene-pos	#NAME?	0.75		18185580			FALSE	gene-gene-pos	18185580	#NAME?	55112	WDR60	MIMAT0000765	hsa-miR-335-5p	55112 (validated miRTarBase) MIMAT0000765		0.75
2382					validated miRTarBase	2382	18185580	55243	hsa-miR-335-5p	gene-gene-pos	#NAME?	0.75		18185580			FALSE	gene-gene-pos	18185580	#NAME?	55243	KIRREL1	MIMAT0000765	hsa-miR-335-5p	55243 (validated miRTarBase) MIMAT0000765		0.75
2383					validated miRTarBase	2383	23824327	55342	hsa-miR-204-5p	gene-gene-pos	#NAME?	0.75		23824327			FALSE	gene-gene-pos	23824327	#NAME?	55342	STRBP	MIMAT0000265	hsa-miR-204-5p	55342 (validated miRTarBase) MIMAT0000265		0.75
2384	0.980412				1-PVALUE_OG-v5	2384		ENST00000376712	hsa-miR-146a*	gene-gene-pos	#NAME?	0.980412					FALSE	gene-gene-pos		#NAME?	55757	UGGT2	hsa-miR-146a*	hsa-miR-146a*	55757 (1-PVALUE_OG-v5) hsa-miR-146a*
2385					miRanda-SCORE-v5	2385		ENST00000376712	hsa-miR-146a*	gene-gene-pos	#NAME?	0.694576	0.694576				FALSE	gene-gene-pos		#NAME?	55757	UGGT2	hsa-miR-146a*	hsa-miR-146a*	55757 (miRanda-SCORE-v5) hsa-miR-146a*
2386					validated miRTarBase	2386	18185580	55904	hsa-miR-335-5p	gene-gene-pos	#NAME?	0.75		18185580			FALSE	gene-gene-pos	18185580	#NAME?	55904	KMT2E	MIMAT0000765	hsa-miR-335-5p	55904 (validated miRTarBase) MIMAT0000765		0.75
2387					miRanda-SCORE-v5	2387		ENST00000378190	hsa-miR-335	gene-gene-pos	#NAME?	0.661524	0.661524				FALSE	gene-gene-pos		#NAME?	55966	AJAP1	MIMAT0000765	hsa-miR-335-5p	55966 (miRanda-SCORE-v5) MIMAT0000765
2388	0.972407				1-PVALUE_OG-v5	2388		ENST00000378190	hsa-miR-335	gene-gene-pos	#NAME?	0.972407					FALSE	gene-gene-pos		#NAME?	55966	AJAP1	MIMAT0000765	hsa-miR-335-5p	55966 (1-PVALUE_OG-v5) MIMAT0000765
2389					validated miRTarBase	2389	19536157	55966	hsa-miR-423-5p	gene-gene-pos	#NAME?	0.75		19536157			FALSE	gene-gene-pos	19536157	#NAME?	55966	AJAP1	MIMAT0004748	hsa-miR-423-5p	55966 (validated miRTarBase) MIMAT0004748		0.75
2390					validated miRTarBase	2390	18185580	56203	hsa-miR-335-5p	gene-gene-pos	#NAME?	0.75		18185580			FALSE	gene-gene-pos	18185580	#NAME?	56203	LMOD3	MIMAT0000765	hsa-miR-335-5p	56203 (validated miRTarBase) MIMAT0000765		0.75
2391					validated miRTarBase	2391	18185580	56253	hsa-miR-335-5p	gene-gene-pos	#NAME?	0.75		18185580			FALSE	gene-gene-pos	18185580	#NAME?	56253	CRTAM	MIMAT0000765	hsa-miR-335-5p	56253 (validated miRTarBase) MIMAT0000765		0.75
2392	0.999742				1-PVALUE_OG-v5	2392		ENST00000227348	hsa-miR-767-3p	gene-gene-pos	#NAME?	0.999742					FALSE	gene-gene-pos		#NAME?	56253	CRTAM	MIMAT0003883	hsa-miR-767-3p	56253 (1-PVALUE_OG-v5) MIMAT0003883
2393					miRanda-SCORE-v5	2393		ENST00000227348	hsa-miR-767-3p	gene-gene-pos	#NAME?	0.654176	0.654176				FALSE	gene-gene-pos		#NAME?	56253	CRTAM	MIMAT0003883	hsa-miR-767-3p	56253 (miRanda-SCORE-v5) MIMAT0003883
2394	0.995881				1-PVALUE_OG-v5	2394		ENST00000257860	hsa-miR-638	gene-gene-pos	#NAME?	0.995881					FALSE	gene-gene-pos		#NAME?	5630	PRPH	MIMAT0003308	hsa-miR-638	5630 (1-PVALUE_OG-v5) MIMAT0003308
2395					miRanda-SCORE-v5	2395		ENST00000257860	hsa-miR-638	gene-gene-pos	#NAME?	0.60788	0.60788				FALSE	gene-gene-pos		#NAME?	5630	PRPH	MIMAT0003308	hsa-miR-638	5630 (miRanda-SCORE-v5) MIMAT0003308
2396					validated miRTarBase	2396	18185580	56478	hsa-miR-335-5p	gene-gene-pos	#NAME?	0.75		18185580			FALSE	gene-gene-pos	18185580	#NAME?	56478	EIF4ENIF1	MIMAT0000765	hsa-miR-335-5p	56478 (validated miRTarBase) MIMAT0000765		0.75
2397					miRanda-SCORE-v5	2397		ENST00000020673	hsa-miR-18b*	gene-gene-pos	#NAME?	0.618632	0.618632				FALSE	gene-gene-pos		#NAME?	5662	PSD	hsa-miR-18b*	hsa-miR-18b*	5662 (miRanda-SCORE-v5) hsa-miR-18b*
2398	0.999758				1-PVALUE_OG-v5	2398		ENST00000020673	hsa-miR-18b*	gene-gene-pos	#NAME?	0.999758					FALSE	gene-gene-pos		#NAME?	5662	PSD	hsa-miR-18b*	hsa-miR-18b*	5662 (1-PVALUE_OG-v5) hsa-miR-18b*
2399					validated miRTarBase	2399	18185580	56886	hsa-miR-335-5p	gene-gene-pos	#NAME?	0.75		18185580			FALSE	gene-gene-pos	18185580	#NAME?	56886	UGGT1	MIMAT0000765	hsa-miR-335-5p	56886 (validated miRTarBase) MIMAT0000765		0.75
2400	0.999993				1-PVALUE_OG-v5	2400		ENST00000341356	hsa-miR-939	gene-gene-pos	#NAME?	0.999993					FALSE	gene-gene-pos		#NAME?	57175	CORO1B	MIMAT0004982	hsa-miR-939-5p	57175 (1-PVALUE_OG-v5) MIMAT0004982
2401					miRanda-SCORE-v5	2401		ENST00000341356	hsa-miR-939	gene-gene-pos	#NAME?	0.668572	0.668572				FALSE	gene-gene-pos		#NAME?	57175	CORO1B	MIMAT0004982	hsa-miR-939-5p	57175 (miRanda-SCORE-v5) MIMAT0004982
2402					validated miRTarBase	2402	18185580	5743	hsa-miR-335-5p	gene-gene-pos	#NAME?	0.75		18185580			FALSE	gene-gene-pos	18185580	#NAME?	5743	PTGS2	MIMAT0000765	hsa-miR-335-5p	5743 (validated miRTarBase) MIMAT0000765		0.75
2403					validated miRTarBase	2403	23592263	57469	hsa-miR-423-5p	gene-gene-pos	#NAME?	0.75		23592263			FALSE	gene-gene-pos	23592263	#NAME?	57469	PNMA8B	MIMAT0004748	hsa-miR-423-5p	57469 (validated miRTarBase) MIMAT0004748		0.75
2404					validated miRTarBase	2404	18185580	57572	hsa-miR-335-5p	gene-gene-pos	#NAME?	0.75		18185580			FALSE	gene-gene-pos	18185580	#NAME?	57572	DOCK6	MIMAT0000765	hsa-miR-335-5p	57572 (validated miRTarBase) MIMAT0000765		0.75
2405					validated miRTarBase	2405	18185580	57654	hsa-miR-335-5p	gene-gene-pos	#NAME?	0.75		18185580			FALSE	gene-gene-pos	18185580	#NAME?	57654	UVSSA	MIMAT0000765	hsa-miR-335-5p	57654 (validated miRTarBase) MIMAT0000765		0.75
2406	0.995698				1-PVALUE_OG-v5	2406		ENST00000352632	hsa-miR-767-3p	gene-gene-pos	#NAME?	0.995698					FALSE	gene-gene-pos		#NAME?	57731	SPTBN4	MIMAT0003883	hsa-miR-767-3p	57731 (1-PVALUE_OG-v5) MIMAT0003883
2407					miRanda-SCORE-v5	2407		ENST00000352632	hsa-miR-767-3p	gene-gene-pos	#NAME?	0.620548	0.620548				FALSE	gene-gene-pos		#NAME?	57731	SPTBN4	MIMAT0003883	hsa-miR-767-3p	57731 (miRanda-SCORE-v5) MIMAT0003883
2408					miRanda-SCORE-v5	2408		ENST00000318974	hsa-miR-767-3p	gene-gene-pos	#NAME?	0.629012	0.629012				FALSE	gene-gene-pos		#NAME?	5777	PTPN6	MIMAT0003883	hsa-miR-767-3p	5777 (miRanda-SCORE-v5) MIMAT0003883
2409	0.999061				1-PVALUE_OG-v5	2409		ENST00000318974	hsa-miR-767-3p	gene-gene-pos	#NAME?	0.999061					FALSE	gene-gene-pos		#NAME?	5777	PTPN6	MIMAT0003883	hsa-miR-767-3p	5777 (1-PVALUE_OG-v5) MIMAT0003883
2410	0.972384				1-PVALUE_OG-v5	2410		ENST00000318974	hsa-miR-149*	gene-gene-pos	#NAME?	0.972384					FALSE	gene-gene-pos		#NAME?	5777	PTPN6	hsa-miR-149*	hsa-miR-149*	5777 (1-PVALUE_OG-v5) hsa-miR-149*
2411					miRanda-SCORE-v5	2411		ENST00000318974	hsa-miR-149*	gene-gene-pos	#NAME?	0.745288	0.745288				FALSE	gene-gene-pos		#NAME?	5777	PTPN6	hsa-miR-149*	hsa-miR-149*	5777 (miRanda-SCORE-v5) hsa-miR-149*
2412					validated miRTarBase	2412	18185580	5797	hsa-miR-335-5p	gene-gene-pos	#NAME?	0.75		18185580			FALSE	gene-gene-pos	18185580	#NAME?	5797	PTPRM	MIMAT0000765	hsa-miR-335-5p	5797 (validated miRTarBase) MIMAT0000765		0.75
2413					miRanda-SCORE-v5	2413		ENST00000332175	hsa-miR-767-3p	gene-gene-pos	#NAME?	0.641228	0.641228				FALSE	gene-gene-pos		#NAME?	5797	PTPRM	MIMAT0003883	hsa-miR-767-3p	5797 (miRanda-SCORE-v5) MIMAT0003883
2414	0.996924				1-PVALUE_OG-v5	2414		ENST00000332175	hsa-miR-767-3p	gene-gene-pos	#NAME?	0.996924					FALSE	gene-gene-pos		#NAME?	5797	PTPRM	MIMAT0003883	hsa-miR-767-3p	5797 (1-PVALUE_OG-v5) MIMAT0003883
2415					validated miRTarBase	2415	18185580	5833	hsa-miR-335-5p	gene-gene-pos	#NAME?	0.75		18185580			FALSE	gene-gene-pos	18185580	#NAME?	5833	PCYT2	MIMAT0000765	hsa-miR-335-5p	5833 (validated miRTarBase) MIMAT0000765		0.75
2416	0.999993				1-PVALUE_OG-v5	2416		ENST00000249601	hsa-miR-204	gene-gene-pos	#NAME?	0.999993					FALSE	gene-gene-pos		#NAME?	58504	ARHGAP22	MIMAT0000265	hsa-miR-204-5p	58504 (1-PVALUE_OG-v5) MIMAT0000265
2417					miRanda-SCORE-v5	2417		ENST00000249601	hsa-miR-204	gene-gene-pos	#NAME?	0.67408	0.67408				FALSE	gene-gene-pos		#NAME?	58504	ARHGAP22	MIMAT0000265	hsa-miR-204-5p	58504 (miRanda-SCORE-v5) MIMAT0000265
2418					miRanda-SCORE-v5	2418		ENST00000249601	hsa-miR-550	gene-gene-pos	#NAME?	0.630776	0.630776				FALSE	gene-gene-pos		#NAME?	58504	ARHGAP22	MIMAT0004800	hsa-miR-550a-5p	58504 (miRanda-SCORE-v5) MIMAT0004800
2419	0.993994				1-PVALUE_OG-v5	2419		ENST00000249601	hsa-miR-550	gene-gene-pos	#NAME?	0.993994					FALSE	gene-gene-pos		#NAME?	58504	ARHGAP22	MIMAT0004800	hsa-miR-550a-5p	58504 (1-PVALUE_OG-v5) MIMAT0004800
2420	0.999634				1-PVALUE_OG-v5	2420		ENST00000248070	hsa-miR-423-5p	gene-gene-pos	#NAME?	0.999634					FALSE	gene-gene-pos		#NAME?	58513	EPS15L1	MIMAT0004748	hsa-miR-423-5p	58513 (1-PVALUE_OG-v5) MIMAT0004748
2421					miRanda-SCORE-v5	2421		ENST00000248070	hsa-miR-423-5p	gene-gene-pos	#NAME?	0.764768	0.764768				FALSE	gene-gene-pos		#NAME?	58513	EPS15L1	MIMAT0004748	hsa-miR-423-5p	58513 (miRanda-SCORE-v5) MIMAT0004748
2422	0.99665				1-PVALUE_OG-v5	2422		ENST00000248070	hsa-miR-149*	gene-gene-pos	#NAME?	0.99665					FALSE	gene-gene-pos		#NAME?	58513	EPS15L1	hsa-miR-149*	hsa-miR-149*	58513 (1-PVALUE_OG-v5) hsa-miR-149*
2423					miRanda-SCORE-v5	2423		ENST00000248070	hsa-miR-149*	gene-gene-pos	#NAME?	0.69042	0.69042				FALSE	gene-gene-pos		#NAME?	58513	EPS15L1	hsa-miR-149*	hsa-miR-149*	58513 (miRanda-SCORE-v5) hsa-miR-149*
2424					validated miRTarBase	2424	18185580	5972	hsa-miR-335-5p	gene-gene-pos	#NAME?	0.75		18185580			FALSE	gene-gene-pos	18185580	#NAME?	5972	REN	MIMAT0000765	hsa-miR-335-5p	5972 (validated miRTarBase) MIMAT0000765		0.75
2425	0.963044				1-PVALUE_OG-v5	2425		ENST00000272190	hsa-miR-423-5p	gene-gene-pos	#NAME?	0.963044					FALSE	gene-gene-pos		#NAME?	5972	REN	MIMAT0004748	hsa-miR-423-5p	5972 (1-PVALUE_OG-v5) MIMAT0004748
2426					miRanda-SCORE-v5	2426		ENST00000272190	hsa-miR-423-5p	gene-gene-pos	#NAME?	0.68784	0.68784				FALSE	gene-gene-pos		#NAME?	5972	REN	MIMAT0004748	hsa-miR-423-5p	5972 (miRanda-SCORE-v5) MIMAT0004748
2427					validated miRTarBase	2427	23824327	6096	hsa-miR-204-5p	gene-gene-pos	#NAME?	0.75		23824327			FALSE	gene-gene-pos	23824327	#NAME?	6096	RORB	MIMAT0000265	hsa-miR-204-5p	6096 (validated miRTarBase) MIMAT0000265		0.75
2428					validated miRTarBase	2428	18185580	6096	hsa-miR-335-5p	gene-gene-pos	#NAME?	0.75		18185580			FALSE	gene-gene-pos	18185580	#NAME?	6096	RORB	MIMAT0000765	hsa-miR-335-5p	6096 (validated miRTarBase) MIMAT0000765		0.75
2429					validated miRTarBase	2429	19536157	6241	hsa-miR-423-5p	gene-gene-pos	#NAME?	0.75		19536157			FALSE	gene-gene-pos	19536157	#NAME?	6241	RRM2	MIMAT0004748	hsa-miR-423-5p	6241 (validated miRTarBase) MIMAT0004748		0.75
2430	0.967314				1-PVALUE_OG-v5	2430		ENST00000359596	hsa-miR-149*	gene-gene-pos	#NAME?	0.967314					FALSE	gene-gene-pos		#NAME?	6261	RYR1	hsa-miR-149*	hsa-miR-149*	6261 (1-PVALUE_OG-v5) hsa-miR-149*
2431					miRanda-SCORE-v5	2431		ENST00000359596	hsa-miR-149*	gene-gene-pos	#NAME?	0.736144	0.736144				FALSE	gene-gene-pos		#NAME?	6261	RYR1	hsa-miR-149*	hsa-miR-149*	6261 (miRanda-SCORE-v5) hsa-miR-149*
2432					validated miRTarBase	2432	23824327	6310	hsa-miR-204-5p	gene-gene-pos	#NAME?	0.75		23824327			FALSE	gene-gene-pos	23824327	#NAME?	6310	ATXN1	MIMAT0000265	hsa-miR-204-5p	6310 (validated miRTarBase) MIMAT0000265		0.75
2433					validated miRTarBase	2433	18185580	6310	hsa-miR-335-5p	gene-gene-pos	#NAME?	0.75		18185580			FALSE	gene-gene-pos	18185580	#NAME?	6310	ATXN1	MIMAT0000765	hsa-miR-335-5p	6310 (validated miRTarBase) MIMAT0000765		0.75
2434	0.96744				1-PVALUE_OG-v5	2434		ENST00000377617	hsa-miR-550	gene-gene-pos	#NAME?	0.96744					FALSE	gene-gene-pos		#NAME?	6311	ATXN2	MIMAT0004800	hsa-miR-550a-5p	6311 (1-PVALUE_OG-v5) MIMAT0004800
2435					miRanda-SCORE-v5	2435		ENST00000377617	hsa-miR-550	gene-gene-pos	#NAME?	0.65992	0.65992				FALSE	gene-gene-pos		#NAME?	6311	ATXN2	MIMAT0004800	hsa-miR-550a-5p	6311 (miRanda-SCORE-v5) MIMAT0004800
2436					validated miRTarBase	2436	18185580	6364	hsa-miR-335-5p	gene-gene-pos	#NAME?	0.75		18185580			FALSE	gene-gene-pos	18185580	#NAME?	6364	CCL20	MIMAT0000765	hsa-miR-335-5p	6364 (validated miRTarBase) MIMAT0000765		0.75
2437					miRanda-SCORE-v5	2437		ENST00000269844	hsa-miR-204	gene-gene-pos	#NAME?	0.686768	0.686768				FALSE	gene-gene-pos		#NAME?	63977	PRDM15	MIMAT0000265	hsa-miR-204-5p	63977 (miRanda-SCORE-v5) MIMAT0000265
2438	0.966441				1-PVALUE_OG-v5	2438		ENST00000269844	hsa-miR-204	gene-gene-pos	#NAME?	0.966441					FALSE	gene-gene-pos		#NAME?	63977	PRDM15	MIMAT0000265	hsa-miR-204-5p	63977 (1-PVALUE_OG-v5) MIMAT0000265
2439					validated miRTarBase	2439	18185580	6400	hsa-miR-335-5p	gene-gene-pos	#NAME?	0.75		18185580			FALSE	gene-gene-pos	18185580	#NAME?	6400	SEL1L	MIMAT0000765	hsa-miR-335-5p	6400 (validated miRTarBase) MIMAT0000765		0.75
2440	0.999361				1-PVALUE_OG-v5	2440		ENST00000223054	hsa-miR-149*	gene-gene-pos	#NAME?	0.999361					FALSE	gene-gene-pos		#NAME?	64598	MOSPD3	hsa-miR-149*	hsa-miR-149*	64598 (1-PVALUE_OG-v5) hsa-miR-149*
2441					miRanda-SCORE-v5	2441		ENST00000223054	hsa-miR-149*	gene-gene-pos	#NAME?	0.74986	0.74986				FALSE	gene-gene-pos		#NAME?	64598	MOSPD3	hsa-miR-149*	hsa-miR-149*	64598 (miRanda-SCORE-v5) hsa-miR-149*
2442					validated miRTarBase	2442	24924414	64699	hsa-miR-204-5p	gene-gene-pos	#NAME?	1		24924414			FALSE	gene-gene-pos	24924414	#NAME?	64699	TMPRSS3	MIMAT0000265	hsa-miR-204-5p	64699 (validated miRTarBase) MIMAT0000265		1
2443	0.986226				1-PVALUE_OG-v5	2443		ENST00000309352	hsa-miR-146a*	gene-gene-pos	#NAME?	0.986226					FALSE	gene-gene-pos		#NAME?	64978	MRPL38	hsa-miR-146a*	hsa-miR-146a*	64978 (1-PVALUE_OG-v5) hsa-miR-146a*
2444					miRanda-SCORE-v5	2444		ENST00000309352	hsa-miR-146a*	gene-gene-pos	#NAME?	0.709508	0.709508				FALSE	gene-gene-pos		#NAME?	64978	MRPL38	hsa-miR-146a*	hsa-miR-146a*	64978 (miRanda-SCORE-v5) hsa-miR-146a*
2445					validated miRTarBase	2445	23622248	65267	hsa-miR-204-5p	gene-gene-pos	#NAME?	0.75		23622248			FALSE	gene-gene-pos	23622248	#NAME?	65267	WNK3	MIMAT0000265	hsa-miR-204-5p	65267 (validated miRTarBase) MIMAT0000265		0.75
2446	0.996423				1-PVALUE_OG-v5	2446		ENST00000323078	hsa-miR-767-3p	gene-gene-pos	#NAME?	0.996423					FALSE	gene-gene-pos		#NAME?	65999	LRRC61	MIMAT0003883	hsa-miR-767-3p	65999 (1-PVALUE_OG-v5) MIMAT0003883
2447					miRanda-SCORE-v5	2447		ENST00000323078	hsa-miR-767-3p	gene-gene-pos	#NAME?	0.760304	0.760304				FALSE	gene-gene-pos		#NAME?	65999	LRRC61	MIMAT0003883	hsa-miR-767-3p	65999 (miRanda-SCORE-v5) MIMAT0003883
2448					validated miRTarBase	2448	18185580	66035	hsa-miR-335-5p	gene-gene-pos	#NAME?	0.75		18185580			FALSE	gene-gene-pos	18185580	#NAME?	66035	SLC2A11	MIMAT0000765	hsa-miR-335-5p	66035 (validated miRTarBase) MIMAT0000765		0.75
2449					validated miRTarBase	2449	18185580	6615	hsa-miR-335-5p	gene-gene-pos	#NAME?	0.75		18185580			FALSE	gene-gene-pos	18185580	#NAME?	6615	SNAI1	MIMAT0000765	hsa-miR-335-5p	6615 (validated miRTarBase) MIMAT0000765		0.75
2450					validated miRTarBase	2450	18185580	6660	hsa-miR-335-5p	gene-gene-pos	#NAME?	0.75		18185580			FALSE	gene-gene-pos	18185580	#NAME?	6660	SOX5	MIMAT0000765	hsa-miR-335-5p	6660 (validated miRTarBase) MIMAT0000765		0.75
2451	0.992685				1-PVALUE_OG-v5	2451		ENST00000332118	hsa-miR-550	gene-gene-pos	#NAME?	0.992685					FALSE	gene-gene-pos		#NAME?	6734	SRPRA	MIMAT0004800	hsa-miR-550a-5p	6734 (1-PVALUE_OG-v5) MIMAT0004800
2452					miRanda-SCORE-v5	2452		ENST00000332118	hsa-miR-550	gene-gene-pos	#NAME?	0.635252	0.635252				FALSE	gene-gene-pos		#NAME?	6734	SRPRA	MIMAT0004800	hsa-miR-550a-5p	6734 (miRanda-SCORE-v5) MIMAT0004800
2453	0.997332				1-PVALUE_OG-v5	2453		ENST00000377897	hsa-miR-204	gene-gene-pos	#NAME?	0.997332					FALSE	gene-gene-pos		#NAME?	6811	STX5	MIMAT0000265	hsa-miR-204-5p	6811 (1-PVALUE_OG-v5) MIMAT0000265
2454					miRanda-SCORE-v5	2454		ENST00000377897	hsa-miR-204	gene-gene-pos	#NAME?	0.686584	0.686584				FALSE	gene-gene-pos		#NAME?	6811	STX5	MIMAT0000265	hsa-miR-204-5p	6811 (miRanda-SCORE-v5) MIMAT0000265
2455					validated miRTarBase	2455	18185580	6833	hsa-miR-335-5p	gene-gene-pos	#NAME?	0.75		18185580			FALSE	gene-gene-pos	18185580	#NAME?	6833	ABCC8	MIMAT0000765	hsa-miR-335-5p	6833 (validated miRTarBase) MIMAT0000765		0.75
2456					validated miRTarBase	2456	18185580	6857	hsa-miR-335-5p	gene-gene-pos	#NAME?	0.75		18185580			FALSE	gene-gene-pos	18185580	#NAME?	6857	SYT1	MIMAT0000765	hsa-miR-335-5p	6857 (validated miRTarBase) MIMAT0000765		0.75
2457					miRanda-SCORE-v5	2457		ENST00000336395	hsa-miR-638	gene-gene-pos	#NAME?	0.654512	0.654512				FALSE	gene-gene-pos		#NAME?	7016	TESK1	MIMAT0003308	hsa-miR-638	7016 (miRanda-SCORE-v5) MIMAT0003308
2458	0.968058				1-PVALUE_OG-v5	2458		ENST00000336395	hsa-miR-638	gene-gene-pos	#NAME?	0.968058					FALSE	gene-gene-pos		#NAME?	7016	TESK1	MIMAT0003308	hsa-miR-638	7016 (1-PVALUE_OG-v5) MIMAT0003308
2459					validated miRTarBase	2459	18185580	7030	hsa-miR-335-5p	gene-gene-pos	#NAME?	0.75		18185580			FALSE	gene-gene-pos	18185580	#NAME?	7030	TFE3	MIMAT0000765	hsa-miR-335-5p	7030 (validated miRTarBase) MIMAT0000765		0.75
2460					validated miRTarBase	2460	18185580	7042	hsa-miR-335-5p	gene-gene-pos	#NAME?	0.75		18185580			FALSE	gene-gene-pos	18185580	#NAME?	7042	TGFB2	MIMAT0000765	hsa-miR-335-5p	7042 (validated miRTarBase) MIMAT0000765		0.75
2461					validated miRTarBase	2461	18185580	7074	hsa-miR-335-5p	gene-gene-pos	#NAME?	0.75		18185580			FALSE	gene-gene-pos	18185580	#NAME?	7074	TIAM1	MIMAT0000765	hsa-miR-335-5p	7074 (validated miRTarBase) MIMAT0000765		0.75
2462					miRanda-SCORE-v5	2462		ENST00000286827	hsa-miR-335	gene-gene-pos	#NAME?	0.656164	0.656164				FALSE	gene-gene-pos		#NAME?	7074	TIAM1	MIMAT0000765	hsa-miR-335-5p	7074 (miRanda-SCORE-v5) MIMAT0000765
2463	0.968779				1-PVALUE_OG-v5	2463		ENST00000286827	hsa-miR-335	gene-gene-pos	#NAME?	0.968779					FALSE	gene-gene-pos		#NAME?	7074	TIAM1	MIMAT0000765	hsa-miR-335-5p	7074 (1-PVALUE_OG-v5) MIMAT0000765
2464					miRanda-SCORE-v5	2464		ENST00000379705	hsa-miR-335	gene-gene-pos	#NAME?	0.65706	0.65706				FALSE	gene-gene-pos		#NAME?	7223	TRPC4	MIMAT0000765	hsa-miR-335-5p	7223 (miRanda-SCORE-v5) MIMAT0000765
2465	0.999983				1-PVALUE_OG-v5	2465		ENST00000379705	hsa-miR-335	gene-gene-pos	#NAME?	0.999983					FALSE	gene-gene-pos		#NAME?	7223	TRPC4	MIMAT0000765	hsa-miR-335-5p	7223 (1-PVALUE_OG-v5) MIMAT0000765
2466					validated miRTarBase	2466	21572407	7259	hsa-miR-423-5p	gene-gene-pos	#NAME?	0.75		21572407			FALSE	gene-gene-pos	21572407	#NAME?	7259	TSPYL1	MIMAT0004748	hsa-miR-423-5p	7259 (validated miRTarBase) MIMAT0004748		0.75
2467					miRanda-SCORE-v5	2467		ENST00000230510	hsa-miR-335	gene-gene-pos	#NAME?	0.730384	0.730384				FALSE	gene-gene-pos		#NAME?	7272	TTK	MIMAT0000765	hsa-miR-335-5p	7272 (miRanda-SCORE-v5) MIMAT0000765
2468	0.99474				1-PVALUE_OG-v5	2468		ENST00000230510	hsa-miR-335	gene-gene-pos	#NAME?	0.99474					FALSE	gene-gene-pos		#NAME?	7272	TTK	MIMAT0000765	hsa-miR-335-5p	7272 (1-PVALUE_OG-v5) MIMAT0000765
2469					miRanda-SCORE-v5	2469		ENST00000325437	hsa-miR-638	gene-gene-pos	#NAME?	0.657708	0.657708				FALSE	gene-gene-pos		#NAME?	7329	UBE2I	MIMAT0003308	hsa-miR-638	7329 (miRanda-SCORE-v5) MIMAT0003308
2470	0.970304				1-PVALUE_OG-v5	2470		ENST00000325437	hsa-miR-638	gene-gene-pos	#NAME?	0.970304					FALSE	gene-gene-pos		#NAME?	7329	UBE2I	MIMAT0003308	hsa-miR-638	7329 (1-PVALUE_OG-v5) MIMAT0003308
2471					validated miRTarBase	2471	18185580	733	hsa-miR-335-5p	gene-gene-pos	#NAME?	0.75		18185580			FALSE	gene-gene-pos	18185580	#NAME?	733	C8G	MIMAT0000765	hsa-miR-335-5p	733 (validated miRTarBase) MIMAT0000765		0.75
2472	0.96868				1-PVALUE_OG-v5	2472		ENST00000358901	hsa-miR-335	gene-gene-pos	#NAME?	0.96868					FALSE	gene-gene-pos		#NAME?	7415	VCP	MIMAT0000765	hsa-miR-335-5p	7415 (1-PVALUE_OG-v5) MIMAT0000765
2473					miRanda-SCORE-v5	2473		ENST00000358901	hsa-miR-335	gene-gene-pos	#NAME?	0.656024	0.656024				FALSE	gene-gene-pos		#NAME?	7415	VCP	MIMAT0000765	hsa-miR-335-5p	7415 (miRanda-SCORE-v5) MIMAT0000765
2474					miRanda-SCORE-v5	2474		ENST00000376701	hsa-miR-638	gene-gene-pos	#NAME?	0.63658	0.63658				FALSE	gene-gene-pos		#NAME?	7454	WAS	MIMAT0003308	hsa-miR-638	7454 (miRanda-SCORE-v5) MIMAT0003308
2475	0.952081				1-PVALUE_OG-v5	2475		ENST00000376701	hsa-miR-638	gene-gene-pos	#NAME?	0.952081					FALSE	gene-gene-pos		#NAME?	7454	WAS	MIMAT0003308	hsa-miR-638	7454 (1-PVALUE_OG-v5) MIMAT0003308
2476					miRanda-SCORE-v5	2476		ENST00000376701	hsa-miR-423-5p	gene-gene-pos	#NAME?	0.710464	0.710464				FALSE	gene-gene-pos		#NAME?	7454	WAS	MIMAT0004748	hsa-miR-423-5p	7454 (miRanda-SCORE-v5) MIMAT0004748
2477	0.998773				1-PVALUE_OG-v5	2477		ENST00000376701	hsa-miR-423-5p	gene-gene-pos	#NAME?	0.998773					FALSE	gene-gene-pos		#NAME?	7454	WAS	MIMAT0004748	hsa-miR-423-5p	7454 (1-PVALUE_OG-v5) MIMAT0004748
2478	0.989133				1-PVALUE_OG-v5	2478		ENST00000376701	hsa-miR-939	gene-gene-pos	#NAME?	0.989133					FALSE	gene-gene-pos		#NAME?	7454	WAS	MIMAT0004982	hsa-miR-939-5p	7454 (1-PVALUE_OG-v5) MIMAT0004982
2479					miRanda-SCORE-v5	2479		ENST00000376701	hsa-miR-939	gene-gene-pos	#NAME?	0.738584	0.738584				FALSE	gene-gene-pos		#NAME?	7454	WAS	MIMAT0004982	hsa-miR-939-5p	7454 (miRanda-SCORE-v5) MIMAT0004982
2480	0.956673				1-PVALUE_OG-v5	2480		ENST00000294258	hsa-miR-638	gene-gene-pos	#NAME?	0.956673					FALSE	gene-gene-pos		#NAME?	7542	ZFPL1	MIMAT0003308	hsa-miR-638	7542 (1-PVALUE_OG-v5) MIMAT0003308
2481					miRanda-SCORE-v5	2481		ENST00000294258	hsa-miR-638	gene-gene-pos	#NAME?	0.641064	0.641064				FALSE	gene-gene-pos		#NAME?	7542	ZFPL1	MIMAT0003308	hsa-miR-638	7542 (miRanda-SCORE-v5) MIMAT0003308
2482					miRanda-SCORE-v5	2482		ENST00000294258	hsa-miR-423-5p	gene-gene-pos	#NAME?	0.733092	0.733092				FALSE	gene-gene-pos		#NAME?	7542	ZFPL1	MIMAT0004748	hsa-miR-423-5p	7542 (miRanda-SCORE-v5) MIMAT0004748
2483	0.986588				1-PVALUE_OG-v5	2483		ENST00000294258	hsa-miR-423-5p	gene-gene-pos	#NAME?	0.986588					FALSE	gene-gene-pos		#NAME?	7542	ZFPL1	MIMAT0004748	hsa-miR-423-5p	7542 (1-PVALUE_OG-v5) MIMAT0004748
2484					validated miRTarBase	2484	18185580	761	hsa-miR-335-5p	gene-gene-pos	#NAME?	0.75		18185580			FALSE	gene-gene-pos	18185580	#NAME?	761	CA3	MIMAT0000765	hsa-miR-335-5p	761 (validated miRTarBase) MIMAT0000765		0.75
2485	0.99341				1-PVALUE_OG-v5	2485		ENST00000300900	hsa-miR-939	gene-gene-pos	#NAME?	0.99341					FALSE	gene-gene-pos		#NAME?	762	CA4	MIMAT0004982	hsa-miR-939-5p	762 (1-PVALUE_OG-v5) MIMAT0004982
2486					miRanda-SCORE-v5	2486		ENST00000300900	hsa-miR-939	gene-gene-pos	#NAME?	0.797132	0.797132				FALSE	gene-gene-pos		#NAME?	762	CA4	MIMAT0004982	hsa-miR-939-5p	762 (miRanda-SCORE-v5) MIMAT0004982
2487					validated miRTarBase	2487	18185580	774	hsa-miR-335-5p	gene-gene-pos	#NAME?	0.75		18185580			FALSE	gene-gene-pos	18185580	#NAME?	774	CACNA1B	MIMAT0000765	hsa-miR-335-5p	774 (validated miRTarBase) MIMAT0000765		0.75
2488	0.993341				1-PVALUE_OG-v5	2488		ENST00000320330	hsa-miR-146a*	gene-gene-pos	#NAME?	0.993341					FALSE	gene-gene-pos		#NAME?	79447	PAGR1	hsa-miR-146a*	hsa-miR-146a*	79447 (1-PVALUE_OG-v5) hsa-miR-146a*
2489					miRanda-SCORE-v5	2489		ENST00000320330	hsa-miR-146a*	gene-gene-pos	#NAME?	0.668576	0.668576				FALSE	gene-gene-pos		#NAME?	79447	PAGR1	hsa-miR-146a*	hsa-miR-146a*	79447 (miRanda-SCORE-v5) hsa-miR-146a*
2490					validated miRTarBase	2490	23446348	79576	hsa-miR-550a-5p	gene-gene-pos	#NAME?	0.75		23446348			FALSE	gene-gene-pos	23446348	#NAME?	79576	NKAP	MIMAT0004800	hsa-miR-550a-5p	79576 (validated miRTarBase) MIMAT0004800		0.75
2491					validated miRTarBase	2491	23824327	79605	hsa-miR-335-5p	gene-gene-pos	#NAME?	0.75		23824327			FALSE	gene-gene-pos	23824327	#NAME?	79605	PGBD5	MIMAT0000765	hsa-miR-335-5p	79605 (validated miRTarBase) MIMAT0000765		0.75
2492					validated miRTarBase	2492	18185580	79690	hsa-miR-335-5p	gene-gene-pos	#NAME?	0.75		18185580			FALSE	gene-gene-pos	18185580	#NAME?	79690	GAL3ST4	MIMAT0000765	hsa-miR-335-5p	79690 (validated miRTarBase) MIMAT0000765		0.75
2493					validated miRTarBase	2493	18185580	79735	hsa-miR-335-5p	gene-gene-pos	#NAME?	0.75		18185580			FALSE	gene-gene-pos	18185580	#NAME?	79735	TBC1D17	MIMAT0000765	hsa-miR-335-5p	79735 (validated miRTarBase) MIMAT0000765		0.75
2494					miRanda-SCORE-v5	2494		ENST00000221543	hsa-miR-550	gene-gene-pos	#NAME?	0.714992	0.714992				FALSE	gene-gene-pos		#NAME?	79735	TBC1D17	MIMAT0004800	hsa-miR-550a-5p	79735 (miRanda-SCORE-v5) MIMAT0004800
2495	0.992365				1-PVALUE_OG-v5	2495		ENST00000221543	hsa-miR-550	gene-gene-pos	#NAME?	0.992365					FALSE	gene-gene-pos		#NAME?	79735	TBC1D17	MIMAT0004800	hsa-miR-550a-5p	79735 (1-PVALUE_OG-v5) MIMAT0004800
2496					miRanda-SCORE-v5	2496		ENST00000311764	hsa-miR-423-5p	gene-gene-pos	#NAME?	0.66606	0.66606				FALSE	gene-gene-pos		#NAME?	79797	ZNF408	MIMAT0004748	hsa-miR-423-5p	79797 (miRanda-SCORE-v5) MIMAT0004748
2497	0.99661				1-PVALUE_OG-v5	2497		ENST00000311764	hsa-miR-423-5p	gene-gene-pos	#NAME?	0.99661					FALSE	gene-gene-pos		#NAME?	79797	ZNF408	MIMAT0004748	hsa-miR-423-5p	79797 (1-PVALUE_OG-v5) MIMAT0004748
2498	0.964507				1-PVALUE_OG-v5	2498		ENST00000056217	hsa-miR-146a*	gene-gene-pos	#NAME?	0.964507					FALSE	gene-gene-pos		#NAME?	7984	ARHGEF5	hsa-miR-146a*	hsa-miR-146a*	7984 (1-PVALUE_OG-v5) hsa-miR-146a*
2499					miRanda-SCORE-v5	2499		ENST00000056217	hsa-miR-146a*	gene-gene-pos	#NAME?	0.669108	0.669108				FALSE	gene-gene-pos		#NAME?	7984	ARHGEF5	hsa-miR-146a*	hsa-miR-146a*	7984 (miRanda-SCORE-v5) hsa-miR-146a*
2500	0.95957				1-PVALUE_OG-v5	2500		ENST00000380419	hsa-miR-767-3p	gene-gene-pos	#NAME?	0.95957					FALSE	gene-gene-pos		#NAME?	79861	TUBAL3	MIMAT0003883	hsa-miR-767-3p	79861 (1-PVALUE_OG-v5) MIMAT0003883
2501					miRanda-SCORE-v5	2501		ENST00000380419	hsa-miR-767-3p	gene-gene-pos	#NAME?	0.654068	0.654068				FALSE	gene-gene-pos		#NAME?	79861	TUBAL3	MIMAT0003883	hsa-miR-767-3p	79861 (miRanda-SCORE-v5) MIMAT0003883
2502	0.999142				1-PVALUE_OG-v5	2502		ENST00000324464	hsa-miR-939	gene-gene-pos	#NAME?	0.999142					FALSE	gene-gene-pos		#NAME?	79934	COQ8B	MIMAT0004982	hsa-miR-939-5p	79934 (1-PVALUE_OG-v5) MIMAT0004982
2503					miRanda-SCORE-v5	2503		ENST00000324464	hsa-miR-939	gene-gene-pos	#NAME?	0.666216	0.666216				FALSE	gene-gene-pos		#NAME?	79934	COQ8B	MIMAT0004982	hsa-miR-939-5p	79934 (miRanda-SCORE-v5) MIMAT0004982
2504					validated miRTarBase	2504	18185580	79998	hsa-miR-335-5p	gene-gene-pos	#NAME?	0.75		18185580			FALSE	gene-gene-pos	18185580	#NAME?	79998	ANKRD53	MIMAT0000765	hsa-miR-335-5p	79998 (validated miRTarBase) MIMAT0000765		0.75
2505	0.958807				1-PVALUE_OG-v5	2505		ENST00000382368	hsa-miR-939	gene-gene-pos	#NAME?	0.958807					FALSE	gene-gene-pos		#NAME?	80028	FBXL18	MIMAT0004982	hsa-miR-939-5p	80028 (1-PVALUE_OG-v5) MIMAT0004982
2506					miRanda-SCORE-v5	2506		ENST00000382368	hsa-miR-939	gene-gene-pos	#NAME?	0.705944	0.705944				FALSE	gene-gene-pos		#NAME?	80028	FBXL18	MIMAT0004982	hsa-miR-939-5p	80028 (miRanda-SCORE-v5) MIMAT0004982
2507	0.998359				1-PVALUE_OG-v5	2507		ENST00000388795	hsa-miR-335	gene-gene-pos	#NAME?	0.998359					FALSE	gene-gene-pos		#NAME?	80167	ABHD18	MIMAT0000765	hsa-miR-335-5p	80167 (1-PVALUE_OG-v5) MIMAT0000765
2508					miRanda-SCORE-v5	2508		ENST00000388795	hsa-miR-335	gene-gene-pos	#NAME?	0.627004	0.627004				FALSE	gene-gene-pos		#NAME?	80167	ABHD18	MIMAT0000765	hsa-miR-335-5p	80167 (miRanda-SCORE-v5) MIMAT0000765
2509					validated miRTarBase	2509	18185580	80223	hsa-miR-335-5p	gene-gene-pos	#NAME?	0.75		18185580			FALSE	gene-gene-pos	18185580	#NAME?	80223	RAB11FIP1	MIMAT0000765	hsa-miR-335-5p	80223 (validated miRTarBase) MIMAT0000765		0.75
2510	0.965582				1-PVALUE_OG-v5	2510		ENST00000264059	hsa-miR-149*	gene-gene-pos	#NAME?	0.965582					FALSE	gene-gene-pos		#NAME?	80303	EFHD1	hsa-miR-149*	hsa-miR-149*	80303 (1-PVALUE_OG-v5) hsa-miR-149*
2511					miRanda-SCORE-v5	2511		ENST00000264059	hsa-miR-149*	gene-gene-pos	#NAME?	0.733332	0.733332				FALSE	gene-gene-pos		#NAME?	80303	EFHD1	hsa-miR-149*	hsa-miR-149*	80303 (miRanda-SCORE-v5) hsa-miR-149*
2512					validated miRTarBase	2512	18185580	8036	hsa-miR-335-5p	gene-gene-pos	#NAME?	0.75		18185580			FALSE	gene-gene-pos	18185580	#NAME?	8036	SHOC2	MIMAT0000765	hsa-miR-335-5p	8036 (validated miRTarBase) MIMAT0000765		0.75
2513					validated miRTarBase	2513	18185580	80737	hsa-miR-335-5p	gene-gene-pos	#NAME?	0.75		18185580			FALSE	gene-gene-pos	18185580	#NAME?	80737	VWA7	MIMAT0000765	hsa-miR-335-5p	80737 (validated miRTarBase) MIMAT0000765		0.75
2514					miRanda-SCORE-v5	2514		ENST00000221554	hsa-miR-638	gene-gene-pos	#NAME?	0.650032	0.650032				FALSE	gene-gene-pos		#NAME?	81576	CCDC130	MIMAT0003308	hsa-miR-638	81576 (miRanda-SCORE-v5) MIMAT0003308
2515	0.989298				1-PVALUE_OG-v5	2515		ENST00000221554	hsa-miR-638	gene-gene-pos	#NAME?	0.989298					FALSE	gene-gene-pos		#NAME?	81576	CCDC130	MIMAT0003308	hsa-miR-638	81576 (1-PVALUE_OG-v5) MIMAT0003308
2516	0.987523				1-PVALUE_OG-v5	2516		ENST00000221554	hsa-miR-423-5p	gene-gene-pos	#NAME?	0.987523					FALSE	gene-gene-pos		#NAME?	81576	CCDC130	MIMAT0004748	hsa-miR-423-5p	81576 (1-PVALUE_OG-v5) MIMAT0004748
2517					miRanda-SCORE-v5	2517		ENST00000221554	hsa-miR-423-5p	gene-gene-pos	#NAME?	0.656164	0.656164				FALSE	gene-gene-pos		#NAME?	81576	CCDC130	MIMAT0004748	hsa-miR-423-5p	81576 (miRanda-SCORE-v5) MIMAT0004748
2518	0.977587				1-PVALUE_OG-v5	2518		ENST00000334421	hsa-miR-18b*	gene-gene-pos	#NAME?	0.977587					FALSE	gene-gene-pos		#NAME?	81786	TRIM7	hsa-miR-18b*	hsa-miR-18b*	81786 (1-PVALUE_OG-v5) hsa-miR-18b*
2519					miRanda-SCORE-v5	2519		ENST00000334421	hsa-miR-18b*	gene-gene-pos	#NAME?	0.652808	0.652808				FALSE	gene-gene-pos		#NAME?	81786	TRIM7	hsa-miR-18b*	hsa-miR-18b*	81786 (miRanda-SCORE-v5) hsa-miR-18b*
2520					miRanda-SCORE-v5	2520		ENST00000303155	hsa-miR-550	gene-gene-pos	#NAME?	0.656032	0.656032				FALSE	gene-gene-pos		#NAME?	81831	NETO2	MIMAT0004800	hsa-miR-550a-5p	81831 (miRanda-SCORE-v5) MIMAT0004800
2521	0.999981				1-PVALUE_OG-v5	2521		ENST00000303155	hsa-miR-550	gene-gene-pos	#NAME?	0.999981					FALSE	gene-gene-pos		#NAME?	81831	NETO2	MIMAT0004800	hsa-miR-550a-5p	81831 (1-PVALUE_OG-v5) MIMAT0004800
2522					validated miRTarBase	2522	18185580	8202	hsa-miR-335-5p	gene-gene-pos	#NAME?	0.75		18185580			FALSE	gene-gene-pos	18185580	#NAME?	8202	NCOA3	MIMAT0000765	hsa-miR-335-5p	8202 (validated miRTarBase) MIMAT0000765		0.75
2523	0.992563				1-PVALUE_OG-v5	2523		ENST00000371998	hsa-miR-767-3p	gene-gene-pos	#NAME?	0.992563					FALSE	gene-gene-pos		#NAME?	8202	NCOA3	MIMAT0003883	hsa-miR-767-3p	8202 (1-PVALUE_OG-v5) MIMAT0003883
2524					miRanda-SCORE-v5	2524		ENST00000371998	hsa-miR-767-3p	gene-gene-pos	#NAME?	0.728568	0.728568				FALSE	gene-gene-pos		#NAME?	8202	NCOA3	MIMAT0003883	hsa-miR-767-3p	8202 (miRanda-SCORE-v5) MIMAT0003883
2525	0.958721				1-PVALUE_OG-v5	2525		ENST00000371997	hsa-miR-146a*	gene-gene-pos	#NAME?	0.958721					FALSE	gene-gene-pos		#NAME?	8202	NCOA3	hsa-miR-146a*	hsa-miR-146a*	8202 (1-PVALUE_OG-v5) hsa-miR-146a*
2526					miRanda-SCORE-v5	2526		ENST00000371997	hsa-miR-146a*	gene-gene-pos	#NAME?	0.662556	0.662556				FALSE	gene-gene-pos		#NAME?	8202	NCOA3	hsa-miR-146a*	hsa-miR-146a*	8202 (miRanda-SCORE-v5) hsa-miR-146a*
2527	0.977242				1-PVALUE_OG-v5	2527		ENST00000252590	hsa-miR-638	gene-gene-pos	#NAME?	0.977242					FALSE	gene-gene-pos		#NAME?	83483	PLVAP	MIMAT0003308	hsa-miR-638	83483 (1-PVALUE_OG-v5) MIMAT0003308
2528					miRanda-SCORE-v5	2528		ENST00000252590	hsa-miR-638	gene-gene-pos	#NAME?	0.669308	0.669308				FALSE	gene-gene-pos		#NAME?	83483	PLVAP	MIMAT0003308	hsa-miR-638	83483 (miRanda-SCORE-v5) MIMAT0003308
2529					miRanda-SCORE-v5	2529		ENST00000366647	hsa-miR-204	gene-gene-pos	#NAME?	0.64212	0.64212				FALSE	gene-gene-pos		#NAME?	8443	GNPAT	MIMAT0000265	hsa-miR-204-5p	8443 (miRanda-SCORE-v5) MIMAT0000265
2530	0.973263				1-PVALUE_OG-v5	2530		ENST00000366647	hsa-miR-204	gene-gene-pos	#NAME?	0.973263					FALSE	gene-gene-pos		#NAME?	8443	GNPAT	MIMAT0000265	hsa-miR-204-5p	8443 (1-PVALUE_OG-v5) MIMAT0000265
2531	0.981826				1-PVALUE_OG-v5	2531		ENST00000317814	hsa-miR-423-5p	gene-gene-pos	#NAME?	0.981826					FALSE	gene-gene-pos		#NAME?	84667	HES7	MIMAT0004748	hsa-miR-423-5p	84667 (1-PVALUE_OG-v5) MIMAT0004748
2532					miRanda-SCORE-v5	2532		ENST00000317814	hsa-miR-423-5p	gene-gene-pos	#NAME?	0.714092	0.714092				FALSE	gene-gene-pos		#NAME?	84667	HES7	MIMAT0004748	hsa-miR-423-5p	84667 (miRanda-SCORE-v5) MIMAT0004748
2533					validated miRTarBase	2533	18185580	84824	hsa-miR-335-5p	gene-gene-pos	#NAME?	0.75		18185580			FALSE	gene-gene-pos	18185580	#NAME?	84824	FCRLA	MIMAT0000765	hsa-miR-335-5p	84824 (validated miRTarBase) MIMAT0000765		0.75
2534					validated miRTarBase	2534	18185580	8496	hsa-miR-335-5p	gene-gene-pos	#NAME?	0.75		18185580			FALSE	gene-gene-pos	18185580	#NAME?	8496	PPFIBP1	MIMAT0000765	hsa-miR-335-5p	8496 (validated miRTarBase) MIMAT0000765		0.75
2535					miRanda-SCORE-v5	2535		ENST00000309979	hsa-miR-204	gene-gene-pos	#NAME?	0.677848	0.677848				FALSE	gene-gene-pos		#NAME?	8509	NDST2	MIMAT0000265	hsa-miR-204-5p	8509 (miRanda-SCORE-v5) MIMAT0000265
2536	0.999305				1-PVALUE_OG-v5	2536		ENST00000309979	hsa-miR-204	gene-gene-pos	#NAME?	0.999305					FALSE	gene-gene-pos		#NAME?	8509	NDST2	MIMAT0000265	hsa-miR-204-5p	8509 (1-PVALUE_OG-v5) MIMAT0000265
2537					miRanda-SCORE-v5	2537		ENST00000382480	hsa-miR-335	gene-gene-pos	#NAME?	0.665212	0.665212				FALSE	gene-gene-pos		#NAME?	8532	CPZ	MIMAT0000765	hsa-miR-335-5p	8532 (miRanda-SCORE-v5) MIMAT0000765
2538	0.999077				1-PVALUE_OG-v5	2538		ENST00000360986	hsa-miR-335	gene-gene-pos	#NAME?	0.999077					FALSE	gene-gene-pos		#NAME?	8532	CPZ	MIMAT0000765	hsa-miR-335-5p	8532 (1-PVALUE_OG-v5) MIMAT0000765
2539					miRanda-SCORE-v5	2539		ENST00000324666	hsa-miR-638	gene-gene-pos	#NAME?	0.63832	0.63832				FALSE	gene-gene-pos		#NAME?	8603	FAM193A	MIMAT0003308	hsa-miR-638	8603 (miRanda-SCORE-v5) MIMAT0003308
2540	0.997876				1-PVALUE_OG-v5	2540		ENST00000324666	hsa-miR-638	gene-gene-pos	#NAME?	0.997876					FALSE	gene-gene-pos		#NAME?	8603	FAM193A	MIMAT0003308	hsa-miR-638	8603 (1-PVALUE_OG-v5) MIMAT0003308
2541					validated miRTarBase	2541	23622248	861	hsa-miR-423-5p	gene-gene-pos	#NAME?	0.75		23622248			FALSE	gene-gene-pos	23622248	#NAME?	861	RUNX1	MIMAT0004748	hsa-miR-423-5p	861 (validated miRTarBase) MIMAT0004748		0.75
2542					validated miRTarBase	2542	23446348	8665	hsa-miR-550a-5p	gene-gene-pos	#NAME?	0.75		23446348			FALSE	gene-gene-pos	23446348	#NAME?	8665	EIF3F	MIMAT0004800	hsa-miR-550a-5p	8665 (validated miRTarBase) MIMAT0004800		0.75
2543	0.998123				1-PVALUE_OG-v5	2543		ENST00000253108	hsa-miR-638	gene-gene-pos	#NAME?	0.998123					FALSE	gene-gene-pos		#NAME?	8666	EIF3G	MIMAT0003308	hsa-miR-638	8666 (1-PVALUE_OG-v5) MIMAT0003308
2544					miRanda-SCORE-v5	2544		ENST00000253108	hsa-miR-638	gene-gene-pos	#NAME?	0.641064	0.641064				FALSE	gene-gene-pos		#NAME?	8666	EIF3G	MIMAT0003308	hsa-miR-638	8666 (miRanda-SCORE-v5) MIMAT0003308
2545					validated miRTarBase	2545	21572407	8697	hsa-miR-204-5p	gene-gene-pos	#NAME?	0.75		21572407			FALSE	gene-gene-pos	21572407	#NAME?	8697	CDC23	MIMAT0000265	hsa-miR-204-5p	8697 (validated miRTarBase) MIMAT0000265		0.75
2546					validated miRTarBase	2546	21572407	8697	hsa-miR-335-5p	gene-gene-pos	#NAME?	0.75		21572407			FALSE	gene-gene-pos	21572407	#NAME?	8697	CDC23	MIMAT0000765	hsa-miR-335-5p	8697 (validated miRTarBase) MIMAT0000765		0.75
2547					miRanda-SCORE-v5	2547		ENST00000345057	hsa-miR-550	gene-gene-pos	#NAME?	0.679632	0.679632				FALSE	gene-gene-pos		#NAME?	8717	TRADD	MIMAT0004800	hsa-miR-550a-5p	8717 (miRanda-SCORE-v5) MIMAT0004800
2548	0.998852				1-PVALUE_OG-v5	2548		ENST00000345057	hsa-miR-550	gene-gene-pos	#NAME?	0.998852					FALSE	gene-gene-pos		#NAME?	8717	TRADD	MIMAT0004800	hsa-miR-550a-5p	8717 (1-PVALUE_OG-v5) MIMAT0004800
2549					miRanda-SCORE-v5	2549		ENST00000317091	hsa-miR-638	gene-gene-pos	#NAME?	0.662592	0.662592				FALSE	gene-gene-pos		#NAME?	8824	CES2	MIMAT0003308	hsa-miR-638	8824 (miRanda-SCORE-v5) MIMAT0003308
2550	0.978593				1-PVALUE_OG-v5	2550		ENST00000317091	hsa-miR-638	gene-gene-pos	#NAME?	0.978593					FALSE	gene-gene-pos		#NAME?	8824	CES2	MIMAT0003308	hsa-miR-638	8824 (1-PVALUE_OG-v5) MIMAT0003308
2551	0.950415				1-PVALUE_OG-v5	2551		ENST00000323374	hsa-miR-149*	gene-gene-pos	#NAME?	0.950415					FALSE	gene-gene-pos		#NAME?	8877	SPHK1	hsa-miR-149*	hsa-miR-149*	8877 (1-PVALUE_OG-v5) hsa-miR-149*
2552					miRanda-SCORE-v5	2552		ENST00000323374	hsa-miR-149*	gene-gene-pos	#NAME?	0.71328	0.71328				FALSE	gene-gene-pos		#NAME?	8877	SPHK1	hsa-miR-149*	hsa-miR-149*	8877 (miRanda-SCORE-v5) hsa-miR-149*
2553					validated miRTarBase	2553	18185580	89848	hsa-miR-335-5p	gene-gene-pos	#NAME?	0.75		18185580			FALSE	gene-gene-pos	18185580	#NAME?	89848	FCHSD1	MIMAT0000765	hsa-miR-335-5p	89848 (validated miRTarBase) MIMAT0000765		0.75
2554	0.99882				1-PVALUE_OG-v5	2554		ENST00000370350	hsa-miR-767-3p	gene-gene-pos	#NAME?	0.99882					FALSE	gene-gene-pos		#NAME?	89885	FATE1	MIMAT0003883	hsa-miR-767-3p	89885 (1-PVALUE_OG-v5) MIMAT0003883
2555					miRanda-SCORE-v5	2555		ENST00000370350	hsa-miR-767-3p	gene-gene-pos	#NAME?	0.629692	0.629692				FALSE	gene-gene-pos		#NAME?	89885	FATE1	MIMAT0003883	hsa-miR-767-3p	89885 (miRanda-SCORE-v5) MIMAT0003883
2556	0.990687				1-PVALUE_OG-v5	2556		ENST00000267594	hsa-miR-335	gene-gene-pos	#NAME?	0.990687					FALSE	gene-gene-pos		#NAME?	90050	FAM181A	MIMAT0000765	hsa-miR-335-5p	90050 (1-PVALUE_OG-v5) MIMAT0000765
2557					miRanda-SCORE-v5	2557		ENST00000267594	hsa-miR-335	gene-gene-pos	#NAME?	0.70804	0.70804				FALSE	gene-gene-pos		#NAME?	90050	FAM181A	MIMAT0000765	hsa-miR-335-5p	90050 (miRanda-SCORE-v5) MIMAT0000765
2558	0.976062				1-PVALUE_OG-v5	2558		ENST00000267594	hsa-miR-18b*	gene-gene-pos	#NAME?	0.976062					FALSE	gene-gene-pos		#NAME?	90050	FAM181A	hsa-miR-18b*	hsa-miR-18b*	90050 (1-PVALUE_OG-v5) hsa-miR-18b*
2559					miRanda-SCORE-v5	2559		ENST00000267594	hsa-miR-18b*	gene-gene-pos	#NAME?	0.650364	0.650364				FALSE	gene-gene-pos		#NAME?	90050	FAM181A	hsa-miR-18b*	hsa-miR-18b*	90050 (miRanda-SCORE-v5) hsa-miR-18b*
2560					validated miRTarBase	2560	18185580	9026	hsa-miR-335-5p	gene-gene-pos	#NAME?	0.75		18185580			FALSE	gene-gene-pos	18185580	#NAME?	9026	HIP1R	MIMAT0000765	hsa-miR-335-5p	9026 (validated miRTarBase) MIMAT0000765		0.75
2561					validated miRTarBase	2561	18185580	90850	hsa-miR-335-5p	gene-gene-pos	#NAME?	0.75		18185580			FALSE	gene-gene-pos	18185580	#NAME?	90850	ZNF598	MIMAT0000765	hsa-miR-335-5p	90850 (validated miRTarBase) MIMAT0000765		0.75
2562					miRanda-SCORE-v5	2562		ENST00000026218	hsa-miR-204	gene-gene-pos	#NAME?	0.648492	0.648492				FALSE	gene-gene-pos		#NAME?	9091	PIGQ	MIMAT0000265	hsa-miR-204-5p	9091 (miRanda-SCORE-v5) MIMAT0000265
2563	0.999613				1-PVALUE_OG-v5	2563		ENST00000026218	hsa-miR-204	gene-gene-pos	#NAME?	0.999613					FALSE	gene-gene-pos		#NAME?	9091	PIGQ	MIMAT0000265	hsa-miR-204-5p	9091 (1-PVALUE_OG-v5) MIMAT0000265
2564	0.996481				1-PVALUE_OG-v5	2564		ENST00000321878	hsa-miR-767-3p	gene-gene-pos	#NAME?	0.996481					FALSE	gene-gene-pos		#NAME?	9091	PIGQ	MIMAT0003883	hsa-miR-767-3p	9091 (1-PVALUE_OG-v5) MIMAT0003883
2565					miRanda-SCORE-v5	2565		ENST00000321878	hsa-miR-767-3p	gene-gene-pos	#NAME?	0.7475	0.7475				FALSE	gene-gene-pos		#NAME?	9091	PIGQ	MIMAT0003883	hsa-miR-767-3p	9091 (miRanda-SCORE-v5) MIMAT0003883
2566					miRanda-SCORE-v5	2566		ENST00000260187	hsa-miR-204	gene-gene-pos	#NAME?	0.650356	0.650356				FALSE	gene-gene-pos		#NAME?	9099	USP2	MIMAT0000265	hsa-miR-204-5p	9099 (miRanda-SCORE-v5) MIMAT0000265
2567	0.990476				1-PVALUE_OG-v5	2567		ENST00000260187	hsa-miR-204	gene-gene-pos	#NAME?	0.990476					FALSE	gene-gene-pos		#NAME?	9099	USP2	MIMAT0000265	hsa-miR-204-5p	9099 (1-PVALUE_OG-v5) MIMAT0000265
2568					miRanda-SCORE-v5	2568		ENST00000260187	hsa-miR-939	gene-gene-pos	#NAME?	0.665556	0.665556				FALSE	gene-gene-pos		#NAME?	9099	USP2	MIMAT0004982	hsa-miR-939-5p	9099 (miRanda-SCORE-v5) MIMAT0004982
2569	0.987938				1-PVALUE_OG-v5	2569		ENST00000260187	hsa-miR-939	gene-gene-pos	#NAME?	0.987938					FALSE	gene-gene-pos		#NAME?	9099	USP2	MIMAT0004982	hsa-miR-939-5p	9099 (1-PVALUE_OG-v5) MIMAT0004982
2570					validated miRTarBase	2570	18185580	9122	hsa-miR-335-5p	gene-gene-pos	#NAME?	0.75		18185580			FALSE	gene-gene-pos	18185580	#NAME?	9122	SLC16A4	MIMAT0000765	hsa-miR-335-5p	9122 (validated miRTarBase) MIMAT0000765		0.75
2571					validated miRTarBase	2571	19536157	91746	hsa-miR-550a-5p	gene-gene-pos	#NAME?	0.75		19536157			FALSE	gene-gene-pos	19536157	#NAME?	91746	YTHDC1	MIMAT0004800	hsa-miR-550a-5p	91746 (validated miRTarBase) MIMAT0004800		0.75
2572	0.952809				1-PVALUE_OG-v5	2572		ENST00000373982	hsa-miR-335	gene-gene-pos	#NAME?	0.952809					FALSE	gene-gene-pos		#NAME?	9203	ZMYM3	MIMAT0000765	hsa-miR-335-5p	9203 (1-PVALUE_OG-v5) MIMAT0000765
2573					miRanda-SCORE-v5	2573		ENST00000373982	hsa-miR-335	gene-gene-pos	#NAME?	0.63806	0.63806				FALSE	gene-gene-pos		#NAME?	9203	ZMYM3	MIMAT0000765	hsa-miR-335-5p	9203 (miRanda-SCORE-v5) MIMAT0000765
2574	0.950347				1-PVALUE_OG-v5	2574		ENST00000373978	hsa-miR-423-5p	gene-gene-pos	#NAME?	0.950347					FALSE	gene-gene-pos		#NAME?	9203	ZMYM3	MIMAT0004748	hsa-miR-423-5p	9203 (1-PVALUE_OG-v5) MIMAT0004748
2575					miRanda-SCORE-v5	2575		ENST00000373978	hsa-miR-423-5p	gene-gene-pos	#NAME?	0.673748	0.673748				FALSE	gene-gene-pos		#NAME?	9203	ZMYM3	MIMAT0004748	hsa-miR-423-5p	9203 (miRanda-SCORE-v5) MIMAT0004748
2576					validated miRNA	2576		NM_004217	hsa-miR-204	gene-gene-pos	#NAME?	1					FALSE	gene-gene-pos		#NAME?	9212	AURKB	MIMAT0000265	hsa-miR-204-5p	9212 (validated miRNA) MIMAT0000265	1
3252	0.985725				1-PVALUE_OG-v5	3252		ENST00000316199	hsa-miR-204	gene-gene-pos	#NAME?	0.985725					FALSE	gene-gene-pos		#NAME?	9212	AURKB	MIMAT0000265	hsa-miR-204-5p	9212 (1-PVALUE_OG-v5) MIMAT0000265
3253					miRanda-SCORE-v5	3253		ENST00000316199	hsa-miR-204	gene-gene-pos	#NAME?	0.7277	0.7277				FALSE	gene-gene-pos		#NAME?	9212	AURKB	MIMAT0000265	hsa-miR-204-5p	9212 (miRanda-SCORE-v5) MIMAT0000265
3254					validated miRTarBase	3254	18185580	92291	hsa-miR-335-5p	gene-gene-pos	#NAME?	0.75		18185580			FALSE	gene-gene-pos	18185580	#NAME?	92291	CAPN13	MIMAT0000765	hsa-miR-335-5p	92291 (validated miRTarBase) MIMAT0000765		0.75
3255					miRanda-SCORE-v5	3255		ENST00000276935	hsa-miR-423-5p	gene-gene-pos	#NAME?	0.66974	0.66974				FALSE	gene-gene-pos		#NAME?	92949	ADAMTSL1	MIMAT0004748	hsa-miR-423-5p	92949 (miRanda-SCORE-v5) MIMAT0004748
3256	0.997088				1-PVALUE_OG-v5	3256		ENST00000276935	hsa-miR-423-5p	gene-gene-pos	#NAME?	0.997088					FALSE	gene-gene-pos		#NAME?	92949	ADAMTSL1	MIMAT0004748	hsa-miR-423-5p	92949 (1-PVALUE_OG-v5) MIMAT0004748
3257					miRanda-SCORE-v5	3257		ENST00000276935	hsa-miR-939	gene-gene-pos	#NAME?	0.68004	0.68004				FALSE	gene-gene-pos		#NAME?	92949	ADAMTSL1	MIMAT0004982	hsa-miR-939-5p	92949 (miRanda-SCORE-v5) MIMAT0004982
3258	0.995075				1-PVALUE_OG-v5	3258		ENST00000276935	hsa-miR-939	gene-gene-pos	#NAME?	0.995075					FALSE	gene-gene-pos		#NAME?	92949	ADAMTSL1	MIMAT0004982	hsa-miR-939-5p	92949 (1-PVALUE_OG-v5) MIMAT0004982
3259	0.996051				1-PVALUE_OG-v5	3259		ENST00000315396	hsa-miR-423-5p	gene-gene-pos	#NAME?	0.996051					FALSE	gene-gene-pos		#NAME?	93233	CCDC114	MIMAT0004748	hsa-miR-423-5p	93233 (1-PVALUE_OG-v5) MIMAT0004748
3260					miRanda-SCORE-v5	3260		ENST00000315396	hsa-miR-423-5p	gene-gene-pos	#NAME?	0.658	0.658				FALSE	gene-gene-pos		#NAME?	93233	CCDC114	MIMAT0004748	hsa-miR-423-5p	93233 (miRanda-SCORE-v5) MIMAT0004748
3261	0.979056				1-PVALUE_OG-v5	3261		ENST00000367081	hsa-miR-767-3p	gene-gene-pos	#NAME?	0.979056					FALSE	gene-gene-pos		#NAME?	94120	SYTL3	MIMAT0003883	hsa-miR-767-3p	94120 (1-PVALUE_OG-v5) MIMAT0003883
3262					miRanda-SCORE-v5	3262		ENST00000367081	hsa-miR-767-3p	gene-gene-pos	#NAME?	0.683312	0.683312				FALSE	gene-gene-pos		#NAME?	94120	SYTL3	MIMAT0003883	hsa-miR-767-3p	94120 (miRanda-SCORE-v5) MIMAT0003883
3263	0.962916				1-PVALUE_OG-v5	3263		ENST00000339570	hsa-miR-335	gene-gene-pos	#NAME?	0.962916					FALSE	gene-gene-pos		#NAME?	949	SCARB1	MIMAT0000765	hsa-miR-335-5p	949 (1-PVALUE_OG-v5) MIMAT0000765
3264					miRanda-SCORE-v5	3264		ENST00000339570	hsa-miR-335	gene-gene-pos	#NAME?	0.64866	0.64866				FALSE	gene-gene-pos		#NAME?	949	SCARB1	MIMAT0000765	hsa-miR-335-5p	949 (miRanda-SCORE-v5) MIMAT0000765
3265					miRanda-SCORE-v5	3265		ENST00000261693	hsa-miR-939	gene-gene-pos	#NAME?	0.709776	0.709776				FALSE	gene-gene-pos		#NAME?	949	SCARB1	MIMAT0004982	hsa-miR-939-5p	949 (miRanda-SCORE-v5) MIMAT0004982
3266	0.961797				1-PVALUE_OG-v5	3266		ENST00000261693	hsa-miR-939	gene-gene-pos	#NAME?	0.961797					FALSE	gene-gene-pos		#NAME?	949	SCARB1	MIMAT0004982	hsa-miR-939-5p	949 (1-PVALUE_OG-v5) MIMAT0004982
3267					validated miRTarBase	3267	20371350	9527	hsa-miR-939-5p	gene-gene-pos	#NAME?	0.75		20371350			FALSE	gene-gene-pos	20371350	#NAME?	9527	GOSR1	MIMAT0004982	hsa-miR-939-5p	9527 (validated miRTarBase) MIMAT0004982		0.75
3268					validated miRTarBase	3268	18185580	9545	hsa-miR-335-5p	gene-gene-pos	#NAME?	0.75		18185580			FALSE	gene-gene-pos	18185580	#NAME?	9545	RAB3D	MIMAT0000765	hsa-miR-335-5p	9545 (validated miRTarBase) MIMAT0000765		0.75
3269					miRanda-SCORE-v5	3269		ENST00000374038	hsa-miR-638	gene-gene-pos	#NAME?	0.651748	0.651748				FALSE	gene-gene-pos		#NAME?	9584	RBM39	MIMAT0003308	hsa-miR-638	9584 (miRanda-SCORE-v5) MIMAT0003308
3270	0.96598				1-PVALUE_OG-v5	3270		ENST00000374038	hsa-miR-638	gene-gene-pos	#NAME?	0.96598					FALSE	gene-gene-pos		#NAME?	9584	RBM39	MIMAT0003308	hsa-miR-638	9584 (1-PVALUE_OG-v5) MIMAT0003308
3271	0.977971				1-PVALUE_OG-v5	3271		ENST00000360458	hsa-miR-146a*	gene-gene-pos	#NAME?	0.977971					FALSE	gene-gene-pos		#NAME?	9643	MORF4L2	hsa-miR-146a*	hsa-miR-146a*	9643 (1-PVALUE_OG-v5) hsa-miR-146a*
3272					miRanda-SCORE-v5	3272		ENST00000360458	hsa-miR-146a*	gene-gene-pos	#NAME?	0.689576	0.689576				FALSE	gene-gene-pos		#NAME?	9643	MORF4L2	hsa-miR-146a*	hsa-miR-146a*	9643 (miRanda-SCORE-v5) hsa-miR-146a*
3273					validated miRTarBase	3273	18185580	9665	hsa-miR-335-5p	gene-gene-pos	#NAME?	0.75		18185580			FALSE	gene-gene-pos	18185580	#NAME?	9665	MARF1	MIMAT0000765	hsa-miR-335-5p	9665 (validated miRTarBase) MIMAT0000765		0.75
3274					miRanda-SCORE-v5	3274		ENST00000252542	hsa-miR-767-3p	gene-gene-pos	#NAME?	0.647112	0.647112				FALSE	gene-gene-pos		#NAME?	9667	SAFB2	MIMAT0003883	hsa-miR-767-3p	9667 (miRanda-SCORE-v5) MIMAT0003883
3275	0.952834				1-PVALUE_OG-v5	3275		ENST00000252542	hsa-miR-767-3p	gene-gene-pos	#NAME?	0.952834					FALSE	gene-gene-pos		#NAME?	9667	SAFB2	MIMAT0003883	hsa-miR-767-3p	9667 (1-PVALUE_OG-v5) MIMAT0003883
3276					miRanda-SCORE-v5	3276		ENST00000375541	hsa-miR-638	gene-gene-pos	#NAME?	0.671676	0.671676				FALSE	gene-gene-pos		#NAME?	9696	CROCC	MIMAT0003308	hsa-miR-638	9696 (miRanda-SCORE-v5) MIMAT0003308
3277	0.978449				1-PVALUE_OG-v5	3277		ENST00000375541	hsa-miR-638	gene-gene-pos	#NAME?	0.978449					FALSE	gene-gene-pos		#NAME?	9696	CROCC	MIMAT0003308	hsa-miR-638	9696 (1-PVALUE_OG-v5) MIMAT0003308
3278	0.999223				1-PVALUE_OG-v5	3278		ENST00000375541	hsa-miR-939	gene-gene-pos	#NAME?	0.999223					FALSE	gene-gene-pos		#NAME?	9696	CROCC	MIMAT0004982	hsa-miR-939-5p	9696 (1-PVALUE_OG-v5) MIMAT0004982
3279					miRanda-SCORE-v5	3279		ENST00000375541	hsa-miR-939	gene-gene-pos	#NAME?	0.704284	0.704284				FALSE	gene-gene-pos		#NAME?	9696	CROCC	MIMAT0004982	hsa-miR-939-5p	9696 (miRanda-SCORE-v5) MIMAT0004982
3280	0.968718				1-PVALUE_OG-v5	3280		ENST00000361339	hsa-miR-767-3p	gene-gene-pos	#NAME?	0.968718					FALSE	gene-gene-pos		#NAME?	9742	IFT140	MIMAT0003883	hsa-miR-767-3p	9742 (1-PVALUE_OG-v5) MIMAT0003883
3281					miRanda-SCORE-v5	3281		ENST00000361339	hsa-miR-767-3p	gene-gene-pos	#NAME?	0.66114	0.66114				FALSE	gene-gene-pos		#NAME?	9742	IFT140	MIMAT0003883	hsa-miR-767-3p	9742 (miRanda-SCORE-v5) MIMAT0003883
3282					validated miRTarBase	3282	18185580	9886	hsa-miR-335-5p	gene-gene-pos	#NAME?	0.75		18185580			FALSE	gene-gene-pos	18185580	#NAME?	9886	RHOBTB1	MIMAT0000765	hsa-miR-335-5p	9886 (validated miRTarBase) MIMAT0000765		0.75
3283					validated miRTarBase	3283	18185580	9890	hsa-miR-335-5p	gene-gene-pos	#NAME?	0.75		18185580			FALSE	gene-gene-pos	18185580	#NAME?	9890	PLPPR4	MIMAT0000765	hsa-miR-335-5p	9890 (validated miRTarBase) MIMAT0000765		0.75
3284					miRanda-SCORE-v5	3284		ENST00000343815	hsa-miR-335	gene-gene-pos	#NAME?	0.684296	0.684296				FALSE	gene-gene-pos		#NAME?	9898	UBAP2L	MIMAT0000765	hsa-miR-335-5p	9898 (miRanda-SCORE-v5) MIMAT0000765
3285	0.983746				1-PVALUE_OG-v5	3285		ENST00000343815	hsa-miR-335	gene-gene-pos	#NAME?	0.983746					FALSE	gene-gene-pos		#NAME?	9898	UBAP2L	MIMAT0000765	hsa-miR-335-5p	9898 (1-PVALUE_OG-v5) MIMAT0000765
3286	0.986377				1-PVALUE_OG-v5	3286		ENST00000271877	hsa-miR-638	gene-gene-pos	#NAME?	0.986377					FALSE	gene-gene-pos		#NAME?	9898	UBAP2L	MIMAT0003308	hsa-miR-638	9898 (1-PVALUE_OG-v5) MIMAT0003308
3287					miRanda-SCORE-v5	3287		ENST00000271877	hsa-miR-638	gene-gene-pos	#NAME?	0.640524	0.640524				FALSE	gene-gene-pos		#NAME?	9898	UBAP2L	MIMAT0003308	hsa-miR-638	9898 (miRanda-SCORE-v5) MIMAT0003308
3288					miRanda-SCORE-v5	3288		ENST00000343815	hsa-miR-423-5p	gene-gene-pos	#NAME?	0.706512	0.706512				FALSE	gene-gene-pos		#NAME?	9898	UBAP2L	MIMAT0004748	hsa-miR-423-5p	9898 (miRanda-SCORE-v5) MIMAT0004748
3289	0.998676				1-PVALUE_OG-v5	3289		ENST00000343815	hsa-miR-423-5p	gene-gene-pos	#NAME?	0.998676					FALSE	gene-gene-pos		#NAME?	9898	UBAP2L	MIMAT0004748	hsa-miR-423-5p	9898 (1-PVALUE_OG-v5) MIMAT0004748
3290	0.992251				1-PVALUE_OG-v5	3290		ENST00000303375	hsa-miR-204	gene-gene-pos	#NAME?	0.992251					FALSE	gene-gene-pos		#NAME?	9902	MRC2	MIMAT0000265	hsa-miR-204-5p	9902 (1-PVALUE_OG-v5) MIMAT0000265
3291					miRanda-SCORE-v5	3291		ENST00000303375	hsa-miR-204	gene-gene-pos	#NAME?	0.638864	0.638864				FALSE	gene-gene-pos		#NAME?	9902	MRC2	MIMAT0000265	hsa-miR-204-5p	9902 (miRanda-SCORE-v5) MIMAT0000265
3292	0.999126				1-PVALUE_OG-v5	3292		ENST00000303375	hsa-miR-423-5p	gene-gene-pos	#NAME?	0.999126					FALSE	gene-gene-pos		#NAME?	9902	MRC2	MIMAT0004748	hsa-miR-423-5p	9902 (1-PVALUE_OG-v5) MIMAT0004748
3293					miRanda-SCORE-v5	3293		ENST00000303375	hsa-miR-423-5p	gene-gene-pos	#NAME?	0.719024	0.719024				FALSE	gene-gene-pos		#NAME?	9902	MRC2	MIMAT0004748	hsa-miR-423-5p	9902 (miRanda-SCORE-v5) MIMAT0004748
3294					validated miRTarBase	3294	21572407	9987	hsa-miR-550a-5p	gene-gene-pos	#NAME?	0.75		21572407			FALSE	gene-gene-pos	21572407	#NAME?	9987	HNRNPDL	MIMAT0004800	hsa-miR-550a-5p	9987 (validated miRTarBase) MIMAT0004800		0.75
3295					validated miRTarBase	3295	24280681	999	hsa-miR-204-5p	gene-gene-pos	#NAME?	1		24280681			FALSE	gene-gene-pos	24280681	#NAME?	999	CDH1	MIMAT0000265	hsa-miR-204-5p	999 (validated miRTarBase) MIMAT0000265		1
