# Supplementary material for: Transcriptional Repression of MFG-E8 Causes Disturbance in the Homeostasis of Cell Cycle Through DOCK/ZP4/STAT Signaling in Buffalo Mammary Epithelial Cells
Source: Front Cell Dev Biol. 2021 Apr 1;9:568660. doi: 10.3389/fcell.2021.568660 (PMC8047144; doi:10.3389/fcell.2021.568660)
Supplement: Supplementary Table 9 — The information for the identified DEPs associated with apoptosis activity in the proteomics dataset. [file Table_9.XLSX]

## Sheet: Sheet1
Uniprot ID	Protein Name	Gene Name	Nor 114	Nor 116	Nor 115	Nor 117	fold change 114/115	fold change 116/117	Taxonomy	Function
Q2T9W9	Caspase activity and apoptosis inhibitor 1	CAAP1	1.17647	0.789474	0.933333	1.19355	1.2605	0.661451	Bos taurus	Anti-apoptotic protein that modulates a caspase-10 dependent mitochondrial caspase-3/9 feedback amplification loop.
L8HQB0	CASP8 and FADD-like apoptosis regulator		0.764706	0.684211	0.966667	1.29032	0.791075	0.530263	Bos mutus
O02703	Apoptosis regulator BAX	BAX	1.11765	0.842105	1	1.03226	1.11765	0.815789	Bos taurus	Accelerates programmed cell death by binding to, and antagonizing the apoptosis repressor BCL2 or its adenovirus homolog E1B 19k protein. Under stress conditions, undergoes a conformation change that causes translocation to the mitochondrion membrane, leading to the release of cytochrome c that then triggers apoptosis. Promotes activation of CASP3, and thereby apoptosis. BAX deficiency leads to l…
L8HXX6	Cell division cycle and apoptosis regulator protein 1		0.882353	1.10526	1.06667	0.967742	0.827206	1.14211	Bos mutus
O75601-2	Isoform B of Caspase-13	CASP13	1.15294	1.10526	0.966667	0.967742	1.1927	1.14211	Bos taurus	Involved in the activation cascade of caspases responsible for apoptosis execution. Might function by either activating some proteins required for cell death or inactivating proteins necessary for cell survival.
L8I209	Caspase-8		1.05882	1	1	1.03226	1.05882	0.96875	Bos mutus
E1BJT6	Caspase	CASP2	0.941176	0.631579	1	1.19355	0.941176	0.529161	Bos taurus
E1BLU4	Uncharacterized protein	CASP8AP2	0.705882	1	0.966667	1.12903	0.730223	0.885714	Bos taurus
F1MUW4	Apoptotic protease-activating factor 1	APAF1	0.705882	0.526316	1.26667	1.22581	0.557276	0.429363	Bos taurus	Oligomeric Apaf-1 mediates the cytochrome c-dependent autocatalytic activation of pro-caspase-9 (Apaf-3), leading to the activation of caspase-3 and apoptosis. This activation requires ATP.
L8HQB0	CASP8 and FADD-like apoptosis regulator		0.764706	0.684211	0.966667	1.29032	0.791075	0.530263	Bos taurus
