# Supplementary material for: Transcriptional Repression of MFG-E8 Causes Disturbance in the Homeostasis of Cell Cycle Through DOCK/ZP4/STAT Signaling in Buffalo Mammary Epithelial Cells
Source: Frontiers journal article supplement (doi:10.3389/fcell.2021.568660), 2021-04-01
Supplement: Table_2.XLS [file Table_2.XLS]

## Sheet: Cellular Component
Analysis Type:	PANTHER Overrepresentation Test (Released 20171205)
Annotation Version and Release Date:	GO Ontology database Released 2018-05-21
Analyzed List:	Client Text Box Input (Bos taurus)	There are duplicate IDs in the file. The unique set of IDs will be used.
Reference List:	Bos taurus (all genes in database)
Test Type:	FISHER
GO cellular component complete	Bos taurus - REFLIST (21987)	Client Text Box Input (8364)	Client Text Box Input (expected)	Client Text Box Input (over/under)	Client Text Box Input (fold Enrichment)	Client Text Box Input (raw P-value)	Client Text Box Input (FDR)
collagen-containing extracellular matrix (GO:0062023)	91	67	34.62	+	1.94	7.29e-05	0.00214
basement membrane (GO:0005604)	75	54	28.53	+	1.89	0.000493	0.011
mitotic spindle (GO:0072686)	82	57	31.19	+	1.83	0.000582	0.0128
focal adhesion (GO:0005925)	127	84	48.31	+	1.74	0.000137	0.00371
cell-substrate junction (GO:0030055)	134	88	50.97	+	1.73	0.000109	0.003
ruffle (GO:0001726)	116	76	44.13	+	1.72	0.000334	0.00817
cell-substrate adherens junction (GO:0005924)	130	84	49.45	+	1.7	0.000211	0.0054
spindle pole (GO:0000922)	124	80	47.17	+	1.7	0.000285	0.00716
adherens junction (GO:0005912)	217	139	82.55	+	1.68	2.85e-06	0.000114
anchoring junction (GO:0070161)	234	149	89.02	+	1.67	1.55e-06	6.51e-05
centriole (GO:0005814)	102	64	38.8	+	1.65	0.00219	0.0415
microtubule organizing center part (GO:0044450)	143	89	54.4	+	1.64	0.000373	0.00889
extracellular matrix (GO:0031012)	197	122	74.94	+	1.63	3.02e-05	0.001
lamellipodium (GO:0030027)	135	83	51.35	+	1.62	0.000772	0.0164
cell leading edge (GO:0031252)	260	159	98.91	+	1.61	3.41e-06	0.000134
spindle (GO:0005819)	276	162	104.99	+	1.54	1.54e-05	0.000541
microtubule organizing center (GO:0005815)	604	354	229.77	+	1.54	1.38e-10	7.15e-09
condensed chromosome (GO:0000793)	161	94	61.25	+	1.53	0.00117	0.0239
actin cytoskeleton (GO:0015629)	399	232	151.78	+	1.53	4.15e-07	1.92e-05
ribonucleoprotein granule (GO:0035770)	180	104	68.47	+	1.52	0.000824	0.0171
nuclear body (GO:0016604)	611	353	232.43	+	1.52	5.19e-10	2.54e-08
cell cortex (GO:0005938)	188	108	71.52	+	1.51	0.000823	0.0173
centrosome (GO:0005813)	437	251	166.24	+	1.51	2.57e-07	1.22e-05
microtubule cytoskeleton (GO:0015630)	1017	584	386.87	+	1.51	1.37e-15	8.95e-14
cytoplasmic ribonucleoprotein granule (GO:0036464)	169	97	64.29	+	1.51	0.00148	0.0296
chromosomal region (GO:0098687)	260	149	98.91	+	1.51	9.09e-05	0.00258
chromosome, centromeric region (GO:0000775)	168	95	63.91	+	1.49	0.00226	0.0423
nuclear speck (GO:0016607)	302	170	114.88	+	1.48	6.06e-05	0.00184
cytoskeletal part (GO:0044430)	1374	769	522.68	+	1.47	2.59e-18	1.9e-16
cytoplasmic region (GO:0099568)	320	178	121.73	+	1.46	6.17e-05	0.00184
cytoskeleton (GO:0005856)	1738	964	661.15	+	1.46	4.45e-22	5.23e-20
perinuclear region of cytoplasm (GO:0048471)	430	229	163.57	+	1.4	4.82e-05	0.00151
cilium (GO:0005929)	470	250	178.79	+	1.4	2.33e-05	0.000789
nucleoplasm part (GO:0044451)	991	527	376.98	+	1.4	3.82e-10	1.92e-08
transferase complex, transferring phosphorus-containing groups (GO:0061695)	261	138	99.29	+	1.39	0.0019	0.0368
ciliary part (GO:0044441)	346	182	131.62	+	1.38	0.000473	0.0108
plasma membrane bounded cell projection (GO:0120025)	1287	670	489.58	+	1.37	2.34e-11	1.29e-09
cell projection (GO:0042995)	1321	684	502.52	+	1.36	2.76e-11	1.47e-09
cell junction (GO:0030054)	691	357	262.86	+	1.36	2.76e-06	0.000113
supramolecular polymer (GO:0099081)	670	345	254.87	+	1.35	4.66e-06	0.000175
supramolecular complex (GO:0099080)	670	345	254.87	+	1.35	4.66e-06	0.000171
supramolecular fiber (GO:0099512)	663	339	252.21	+	1.34	9.46e-06	0.00034
cell-cell junction (GO:0005911)	334	170	127.06	+	1.34	0.00214	0.041
cell projection part (GO:0044463)	821	417	312.31	+	1.34	1.48e-06	6.5e-05
plasma membrane bounded cell projection part (GO:0120038)	821	417	312.31	+	1.34	1.48e-06	6.34e-05
polymeric cytoskeletal fiber (GO:0099513)	491	246	186.78	+	1.32	0.000448	0.0104
nucleoplasm (GO:0005654)	2356	1180	896.24	+	1.32	6.41e-16	4.34e-14
plasma membrane region (GO:0098590)	659	329	250.69	+	1.31	5.73e-05	0.00177
nucleolus (GO:0005730)	767	382	291.77	+	1.31	1.6e-05	0.000553
intracellular non-membrane-bounded organelle (GO:0043232)	3691	1833	1404.08	+	1.31	2.27e-24	3.08e-22
non-membrane-bounded organelle (GO:0043228)	3691	1833	1404.08	+	1.31	2.27e-24	2.86e-22
nuclear lumen (GO:0031981)	3112	1545	1183.83	+	1.31	4.55e-20	3.48e-18
cytosol (GO:0005829)	2796	1386	1063.62	+	1.3	1.07e-17	7.56e-16
nuclear part (GO:0044428)	3523	1737	1340.17	+	1.3	6.74e-22	7.42e-20
nuclear chromosome (GO:0000228)	467	230	177.65	+	1.29	0.00149	0.0294
organelle lumen (GO:0043233)	3514	1722	1336.75	+	1.29	9.11e-21	8.03e-19
intracellular organelle lumen (GO:0070013)	3514	1722	1336.75	+	1.29	9.11e-21	7.64e-19
membrane-enclosed lumen (GO:0031974)	3514	1722	1336.75	+	1.29	9.11e-21	7.3e-19
nuclear chromosome part (GO:0044454)	441	216	167.76	+	1.29	0.00265	0.0492
transferase complex (GO:1990234)	769	374	292.53	+	1.28	8.93e-05	0.00258
chromosome (GO:0005694)	903	437	343.51	+	1.27	3.14e-05	0.00102
neuron projection (GO:0043005)	680	329	258.68	+	1.27	0.000335	0.00808
chromosomal part (GO:0044427)	822	392	312.69	+	1.25	0.000209	0.00542
neuron part (GO:0097458)	929	441	353.4	+	1.25	0.000109	0.00304
Golgi apparatus (GO:0005794)	1075	500	408.94	+	1.22	0.000165	0.0044
organelle part (GO:0044422)	7116	3278	2706.97	+	1.21	9.73e-29	2.14e-26
intracellular organelle part (GO:0044446)	6926	3190	2634.7	+	1.21	1.39e-27	2.22e-25
nucleus (GO:0005634)	5857	2690	2228.04	+	1.21	2.65e-21	2.75e-19
cytoplasmic part (GO:0044444)	7078	3215	2692.52	+	1.19	1.79e-24	2.62e-22
cytoplasm (GO:0005737)	9209	4168	3503.16	+	1.19	1.77e-35	6.23e-33
catalytic complex (GO:1902494)	1366	613	519.64	+	1.18	0.000488	0.011
protein-containing complex (GO:0032991)	4864	2182	1850.3	+	1.18	4.3e-13	2.7e-11
intracellular part (GO:0044424)	12371	5541	4706.01	+	1.18	5.78e-57	5.09e-54
intracellular organelle (GO:0043229)	10612	4750	4036.87	+	1.18	2.85e-40	1.25e-37
organelle (GO:0043226)	10818	4838	4115.24	+	1.18	1.98e-41	1.16e-38
intracellular membrane-bounded organelle (GO:0043231)	8866	3955	3372.68	+	1.17	8.18e-28	1.44e-25
intracellular (GO:0005622)	12915	5745	4912.95	+	1.17	5.78e-58	1.02e-54
endomembrane system (GO:0012505)	2996	1331	1139.7	+	1.17	4.75e-07	2.14e-05
membrane-bounded organelle (GO:0043227)	9487	4204	3608.92	+	1.16	1.14e-28	2.22e-26
plasma membrane part (GO:0044459)	1955	845	743.69	+	1.14	0.00128	0.026
cell part (GO:0044464)	15502	6446	5897.06	+	1.09	7.01e-31	2.06e-28
cell (GO:0005623)	15550	6455	5915.32	+	1.09	5.41e-30	1.36e-27
cellular_component (GO:0005575)	18069	7148	6873.57	+	1.04	5.5e-12	3.23e-10
membrane (GO:0016020)	8585	3070	3265.79	-	0.94	0.000176	0.00463
membrane part (GO:0044425)	7038	2321	2677.3	-	0.87	5.16e-13	3.13e-11
Unclassified (UNCLASSIFIED)	3918	1216	1490.43	-	0.82	5.5e-12	3.12e-10
intrinsic component of membrane (GO:0031224)	6079	1874	2312.49	-	0.81	7.22e-21	6.69e-19
integral component of membrane (GO:0016021)	6001	1846	2282.82	-	0.81	6.5e-21	6.36e-19
protein-DNA complex (GO:0032993)	219	49	83.31	-	0.59	0.000447	0.0105
large ribosomal subunit (GO:0015934)	176	39	66.95	-	0.58	0.00162	0.0317
cytosolic ribosome (GO:0022626)	173	36	65.81	-	0.55	0.000595	0.0129
respiratory chain (GO:0070469)	107	18	40.7	-	0.44	0.000601	0.0129
DNA packaging complex (GO:0044815)	150	25	57.06	-	0.44	3.99e-05	0.00128
cytosolic large ribosomal subunit (GO:0022625)	104	16	39.56	-	0.4	0.000295	0.00732
nucleosome (GO:0000786)	143	20	54.4	-	0.37	3.69e-06	0.000141

## Sheet: Molecular Function
Analysis Type:	PANTHER Overrepresentation Test (Released 20171205)
Annotation Version and Release Date:	GO Ontology database Released 2018-05-21
Analyzed List:	Client Text Box Input (Bos taurus)	There are duplicate IDs in the file. The unique set of IDs will be used.
Reference List:	Bos taurus (all genes in database)
Test Type:	FISHER
GO molecular function complete	Bos taurus - REFLIST (21987)	Client Text Box Input (8364)	Client Text Box Input (expected)	Client Text Box Input (over/under)	Client Text Box Input (fold Enrichment)	Client Text Box Input (raw P-value)	Client Text Box Input (FDR)
Rho guanyl-nucleotide exchange factor activity (GO:0005089)	75	55	28.53	+	1.93	0.00035	0.0184
microtubule motor activity (GO:0003777)	126	86	47.93	+	1.79	3.97e-05	0.00277
microtubule binding (GO:0008017)	252	170	95.86	+	1.77	1.3e-08	1.22e-06
Rho GTPase binding (GO:0017048)	150	99	57.06	+	1.73	3.22e-05	0.00229
Rab GTPase binding (GO:0017137)	137	89	52.12	+	1.71	0.000126	0.00837
Ras guanyl-nucleotide exchange factor activity (GO:0005088)	122	79	46.41	+	1.7	0.000336	0.018
motor activity (GO:0003774)	140	90	53.26	+	1.69	0.000146	0.00894
small GTPase binding (GO:0031267)	358	229	136.19	+	1.68	1.43e-09	1.51e-07
tubulin binding (GO:0015631)	323	206	122.87	+	1.68	1.05e-08	1.01e-06
Ras GTPase binding (GO:0017016)	349	221	132.76	+	1.66	4.89e-09	5.03e-07
guanyl-nucleotide exchange factor activity (GO:0005085)	196	124	74.56	+	1.66	1.3e-05	0.00103
calcium ion transmembrane transporter activity (GO:0015085)	130	82	49.45	+	1.66	0.000483	0.0246
protein C-terminus binding (GO:0008022)	126	79	47.93	+	1.65	0.000699	0.0346
helicase activity (GO:0004386)	134	84	50.97	+	1.65	0.000439	0.0226
ATP binding (GO:0005524)	1433	892	545.12	+	1.64	5.3e-32	2.73e-29
actin filament binding (GO:0051015)	164	102	62.39	+	1.63	0.000139	0.00881
adenyl ribonucleotide binding (GO:0032559)	1457	903	554.25	+	1.63	5.99e-32	2.74e-29
GTPase binding (GO:0051020)	454	281	172.7	+	1.63	2.27e-10	2.46e-08
adenyl nucleotide binding (GO:0030554)	1462	904	556.15	+	1.63	1.21e-31	4.97e-29
ligase activity (GO:0016874)	167	103	63.53	+	1.62	0.000157	0.0095
protein serine/threonine kinase activity (GO:0004674)	415	251	157.87	+	1.59	1.03e-08	1.01e-06
ATPase activity (GO:0016887)	452	269	171.94	+	1.56	8.46e-09	8.49e-07
protein kinase activity (GO:0004672)	608	359	231.29	+	1.55	4.94e-11	5.5e-09
phosphotransferase activity, alcohol group as acceptor (GO:0016773)	712	418	270.85	+	1.54	2.26e-12	2.73e-10
drug binding (GO:0008144)	1651	969	628.05	+	1.54	3.87e-28	1.33e-25
GTPase activator activity (GO:0005096)	221	129	84.07	+	1.53	0.000143	0.00891
kinase activity (GO:0016301)	788	456	299.76	+	1.52	1.06e-12	1.41e-10
ATPase activity, coupled (GO:0042623)	370	214	140.75	+	1.52	1.36e-06	0.000119
actin binding (GO:0003779)	377	218	143.41	+	1.52	1.07e-06	9.54e-05
phosphatidylinositol binding (GO:0035091)	201	116	76.46	+	1.52	0.000487	0.0244
magnesium ion binding (GO:0000287)	187	107	71.14	+	1.5	0.001	0.0478
GTPase regulator activity (GO:0030695)	236	135	89.78	+	1.5	0.000219	0.0122
cytoskeletal protein binding (GO:0008092)	785	446	298.62	+	1.49	1.35e-11	1.54e-09
purine ribonucleoside triphosphate binding (GO:0035639)	1818	1027	691.58	+	1.49	1.68e-25	3.84e-23
purine ribonucleotide binding (GO:0032555)	1853	1044	704.89	+	1.48	1.04e-25	2.51e-23
ribonucleotide binding (GO:0032553)	1869	1052	710.98	+	1.48	7.9e-26	2.17e-23
purine nucleotide binding (GO:0017076)	1859	1045	707.18	+	1.48	1.85e-25	4e-23
transferase activity, transferring phosphorus-containing groups (GO:0016772)	941	524	357.96	+	1.46	2.02e-12	2.52e-10
nucleotide binding (GO:0000166)	2086	1157	793.53	+	1.46	1.04e-26	3.28e-24
nucleoside phosphate binding (GO:1901265)	2086	1157	793.53	+	1.46	1.04e-26	3.04e-24
nucleoside-triphosphatase regulator activity (GO:0060589)	265	146	100.81	+	1.45	0.000367	0.0191
kinase binding (GO:0019900)	518	284	197.05	+	1.44	9.6e-07	8.78e-05
protein kinase binding (GO:0019901)	461	252	175.37	+	1.44	4.39e-06	0.000369
enzyme binding (GO:0019899)	1727	944	656.96	+	1.44	3.32e-20	6.2e-18
carbohydrate derivative binding (GO:0097367)	2094	1144	796.57	+	1.44	1.26e-24	2.6e-22
phospholipid binding (GO:0005543)	336	183	127.82	+	1.43	0.000108	0.00727
anion binding (GO:0043168)	2622	1411	997.43	+	1.41	1.28e-28	4.78e-26
small molecule binding (GO:0036094)	2421	1298	920.96	+	1.41	1.01e-25	2.59e-23
catalytic activity, acting on RNA (GO:0140098)	362	191	137.71	+	1.39	0.000306	0.0166
chromatin binding (GO:0003682)	453	237	172.32	+	1.38	8.5e-05	0.00583
protein-containing complex binding (GO:0044877)	803	408	305.47	+	1.34	1.87e-06	0.00016
calcium ion binding (GO:0005509)	666	338	253.35	+	1.33	1.58e-05	0.00119
transferase activity (GO:0016740)	2295	1142	873.03	+	1.31	7.63e-15	1.08e-12
nucleoside-triphosphatase activity (GO:0017111)	856	425	325.63	+	1.31	6.46e-06	0.000531
ion binding (GO:0043167)	5245	2575	1995.23	+	1.29	3.41e-34	2.8e-31
pyrophosphatase activity (GO:0016462)	902	441	343.13	+	1.29	1.38e-05	0.00107
hydrolase activity, acting on acid anhydrides (GO:0016817)	909	444	345.79	+	1.28	1.29e-05	0.00104
hydrolase activity, acting on acid anhydrides, in phosphorus-containing anhydrides (GO:0016818)	907	442	345.03	+	1.28	1.66e-05	0.00122
zinc ion binding (GO:0008270)	721	350	274.27	+	1.28	0.000168	0.00987
catalytic activity, acting on a protein (GO:0140096)	2223	1076	845.64	+	1.27	1.23e-11	1.44e-09
metal ion binding (GO:0046872)	3137	1481	1193.34	+	1.24	1.88e-13	2.58e-11
RNA binding (GO:0003723)	1038	486	394.86	+	1.23	0.00013	0.00835
cation binding (GO:0043169)	3220	1505	1224.91	+	1.23	1.31e-12	1.69e-10
transition metal ion binding (GO:0046914)	1015	474	386.11	+	1.23	0.000199	0.0114
protein binding (GO:0005515)	5877	2736	2235.65	+	1.22	1.33e-24	2.61e-22
heterocyclic compound binding (GO:1901363)	5379	2479	2046.21	+	1.21	8.01e-20	1.37e-17
organic cyclic compound binding (GO:0097159)	5446	2500	2071.69	+	1.21	2.75e-19	4.53e-17
identical protein binding (GO:0042802)	1337	609	508.6	+	1.2	0.000175	0.0102
catalytic activity (GO:0003824)	6050	2753	2301.46	+	1.2	3.84e-20	6.87e-18
binding (GO:0005488)	11661	5178	4435.92	+	1.17	3.25e-44	4.46e-41
hydrolase activity (GO:0016787)	2634	1154	1001.99	+	1.15	2.25e-05	0.00162
nucleic acid binding (GO:0003676)	3354	1425	1275.88	+	1.12	0.00016	0.00955
molecular_function (GO:0003674)	16310	6575	6204.43	+	1.06	6.8e-16	9.99e-14
Unclassified (UNCLASSIFIED)	5677	1789	2159.57	-	0.83	6.8e-16	1.04e-13
receptor regulator activity (GO:0030545)	467	129	177.65	-	0.73	0.000994	0.0481
structural constituent of ribosome (GO:0003735)	281	69	106.89	-	0.65	0.000738	0.0361
molecular transducer activity (GO:0060089)	1892	399	719.73	-	0.55	4.88e-32	2.87e-29
signaling receptor activity (GO:0038023)	1887	397	717.83	-	0.55	3.93e-32	2.7e-29
transmembrane signaling receptor activity (GO:0004888)	1745	335	663.81	-	0.5	4.44e-37	4.57e-34
peptide receptor activity (GO:0001653)	132	22	50.21	-	0.44	0.000128	0.00834
G-protein coupled receptor activity (GO:0004930)	1418	206	539.42	-	0.38	1.48e-49	3.04e-46
G-protein coupled peptide receptor activity (GO:0008528)	128	18	48.69	-	0.37	1.52e-05	0.00116
olfactory receptor activity (GO:0004984)	973	86	370.14	-	0.23	4.56e-58	1.88e-54
type I interferon receptor binding (GO:0005132)	45	3	17.12	-	0.18	0.000304	0.0167
neuropeptide receptor activity (GO:0008188)	48	3	18.26	-	0.16	0.000208	0.0117
odorant binding (GO:0005549)	226	14	85.97	-	0.16	7.98e-18	1.26e-15

## Sheet: Biological process
Analysis Type:	PANTHER Overrepresentation Test (Released 20171205)
Annotation Version and Release Date:	GO Ontology database Released 2018-05-21
Analyzed List:	Client Text Box Input (Bos taurus)	There are duplicate IDs in the file. The unique set of IDs will be used.
Reference List:	Bos taurus (all genes in database)
Test Type:	FISHER
GO biological process complete	Bos taurus - REFLIST (21987)	Client Text Box Input (8364)	Client Text Box Input (expected)	Client Text Box Input (over/under)	Client Text Box Input (fold Enrichment)	Client Text Box Input (raw P-value)	Client Text Box Input (FDR)
posttranscriptional gene silencing (GO:0016441)	45	36	17.12	+	2.1	0.0011	0.0484
gene silencing by RNA (GO:0031047)	60	45	22.82	+	1.97	0.000912	0.0416
cerebral cortex development (GO:0021987)	85	60	32.33	+	1.86	0.000359	0.0187
mitotic sister chromatid segregation (GO:0000070)	94	64	35.76	+	1.79	0.000457	0.0227
mitotic nuclear division (GO:0140014)	128	84	48.69	+	1.73	0.000144	0.00905
sister chromatid segregation (GO:0000819)	119	78	45.27	+	1.72	0.000291	0.016
negative regulation of cytoskeleton organization (GO:0051494)	107	70	40.7	+	1.72	0.000517	0.0252
DNA-dependent DNA replication (GO:0006261)	98	64	37.28	+	1.72	0.00104	0.0465
microtubule cytoskeleton organization (GO:0000226)	368	239	139.99	+	1.71	1.94e-10	4.35e-08
regulation of Ras protein signal transduction (GO:0046578)	201	128	76.46	+	1.67	7.24e-06	0.000715
spindle organization (GO:0007051)	115	73	43.75	+	1.67	0.000757	0.0352
regulation of small GTPase mediated signal transduction (GO:0051056)	227	144	86.35	+	1.67	2.56e-06	0.000283
peptidyl-serine phosphorylation (GO:0018105)	164	104	62.39	+	1.67	6.29e-05	0.00456
nuclear chromosome segregation (GO:0098813)	190	120	72.28	+	1.66	2.23e-05	0.0019
regulation of Rho protein signal transduction (GO:0035023)	130	81	49.45	+	1.64	0.000634	0.0303
nuclear division (GO:0000280)	241	150	91.68	+	1.64	3.51e-06	0.000371
meiotic cell cycle process (GO:1903046)	142	88	54.02	+	1.63	0.000467	0.0231
positive regulation of chromosome organization (GO:2001252)	139	86	52.88	+	1.63	0.000537	0.0261
peptidyl-serine modification (GO:0018209)	185	114	70.38	+	1.62	6.78e-05	0.00479
cell-substrate adhesion (GO:0031589)	137	84	52.12	+	1.61	0.000836	0.0383
meiotic cell cycle (GO:0051321)	170	103	64.67	+	1.59	0.000291	0.016
DNA replication (GO:0006260)	147	89	55.92	+	1.59	0.000728	0.0343
organelle fission (GO:0048285)	266	159	101.19	+	1.57	8.8e-06	0.000846
chromosome segregation (GO:0007059)	238	142	90.54	+	1.57	2.97e-05	0.00244
microtubule-based process (GO:0007017)	573	341	217.97	+	1.56	8.44e-11	2.06e-08
microtubule-based movement (GO:0007018)	246	146	93.58	+	1.56	3.04e-05	0.00245
regulation of organelle assembly (GO:1902115)	150	89	57.06	+	1.56	0.00105	0.0468
extracellular matrix organization (GO:0030198)	162	96	61.63	+	1.56	0.000748	0.0349
regulation of microtubule-based process (GO:0032886)	183	108	69.61	+	1.55	0.000358	0.0188
DNA repair (GO:0006281)	361	213	137.33	+	1.55	5.23e-07	6.48e-05
protein autophosphorylation (GO:0046777)	165	97	62.77	+	1.55	0.000827	0.0381
cytoskeleton organization (GO:0007010)	866	507	329.43	+	1.54	1.11e-14	4.74e-12
protein phosphorylation (GO:0006468)	750	439	285.3	+	1.54	8.87e-13	2.92e-10
regulation of DNA metabolic process (GO:0051052)	306	178	116.4	+	1.53	9.56e-06	0.000901
negative regulation of organelle organization (GO:0010639)	283	163	107.66	+	1.51	2.99e-05	0.00244
cellular response to DNA damage stimulus (GO:0006974)	574	330	218.35	+	1.51	2.66e-09	5.36e-07
regulation of actin filament organization (GO:0110053)	214	123	81.41	+	1.51	0.000359	0.0187
extracellular structure organization (GO:0043062)	192	110	73.04	+	1.51	0.00074	0.0346
regulation of cytoskeleton organization (GO:0051493)	419	239	159.39	+	1.5	7.24e-07	8.68e-05
regulation of supramolecular fiber organization (GO:1902903)	283	161	107.66	+	1.5	5.71e-05	0.00416
supramolecular fiber organization (GO:0097435)	356	202	135.42	+	1.49	8.12e-06	0.000791
cell cycle process (GO:0022402)	639	361	243.08	+	1.49	2.08e-09	4.32e-07
protein homooligomerization (GO:0051260)	250	141	95.1	+	1.48	0.000255	0.0145
protein complex oligomerization (GO:0051259)	359	202	136.57	+	1.48	1.08e-05	0.00101
mitotic cell cycle process (GO:1903047)	372	209	141.51	+	1.48	7.98e-06	0.000783
regulation of actin cytoskeleton organization (GO:0032956)	262	147	99.67	+	1.47	0.000225	0.0133
DNA metabolic process (GO:0006259)	592	332	225.2	+	1.47	1.84e-08	3.14e-06
regulation of GTPase activity (GO:0043087)	387	217	147.22	+	1.47	6.15e-06	0.000621
positive regulation of cellular protein localization (GO:1903829)	216	121	82.17	+	1.47	0.000734	0.0345
regulation of actin filament-based process (GO:0032970)	288	161	109.56	+	1.47	0.000122	0.00789
mitotic cell cycle (GO:0000278)	417	233	158.63	+	1.47	3.02e-06	0.000326
cellular nitrogen compound catabolic process (GO:0044270)	281	157	106.89	+	1.47	0.000155	0.00973
phosphorylation (GO:0016310)	1019	568	387.63	+	1.47	1.96e-13	6.77e-11
regulation of chromosome organization (GO:0033044)	281	156	106.89	+	1.46	0.000191	0.0116
regulation of organelle organization (GO:0033043)	974	540	370.52	+	1.46	1.54e-12	4.93e-10
positive regulation of GTPase activity (GO:0043547)	330	182	125.53	+	1.45	7.75e-05	0.00532
positive regulation of organelle organization (GO:0010638)	455	250	173.09	+	1.44	3.86e-06	0.000404
heterocycle catabolic process (GO:0046700)	284	156	108.04	+	1.44	0.000305	0.0166
nucleobase-containing compound catabolic process (GO:0034655)	246	135	93.58	+	1.44	0.000792	0.0367
organic cyclic compound catabolic process (GO:1901361)	311	170	118.31	+	1.44	0.000168	0.0104
endomembrane system organization (GO:0010256)	266	145	101.19	+	1.43	0.000557	0.0269
regulation of cell cycle process (GO:0010564)	485	264	184.5	+	1.43	3.34e-06	0.000354
positive regulation of cell cycle (GO:0045787)	283	154	107.66	+	1.43	0.000441	0.0221
brain development (GO:0007420)	452	245	171.94	+	1.42	9.53e-06	0.000904
aromatic compound catabolic process (GO:0019439)	290	157	110.32	+	1.42	0.000422	0.0214
actin filament-based process (GO:0030029)	431	233	163.96	+	1.42	1.95e-05	0.0017
actin cytoskeleton organization (GO:0030036)	389	210	147.98	+	1.42	5.62e-05	0.00414
cell cycle (GO:0007049)	830	447	315.74	+	1.42	2.95e-09	5.88e-07
regulation of cellular component biogenesis (GO:0044087)	721	387	274.27	+	1.41	4.79e-08	7.13e-06
negative regulation of intracellular signal transduction (GO:1902532)	434	232	165.1	+	1.41	3.6e-05	0.0028
intracellular signal transduction (GO:0035556)	1145	612	435.57	+	1.41	6.63e-12	1.87e-09
forebrain development (GO:0030900)	277	148	105.37	+	1.4	0.00101	0.0455
regulation of mitotic cell cycle (GO:0007346)	439	234	167	+	1.4	3.32e-05	0.00262
regulation of cell cycle (GO:0051726)	848	452	322.58	+	1.4	5.96e-09	1.11e-06
regulation of cellular protein localization (GO:1903827)	355	189	135.04	+	1.4	0.000226	0.0133
negative regulation of cellular component organization (GO:0051129)	491	261	186.78	+	1.4	1.38e-05	0.00125
biological adhesion (GO:0022610)	593	314	225.58	+	1.39	2.3e-06	0.000258
transmembrane receptor protein tyrosine kinase signaling pathway (GO:0007169)	329	174	125.15	+	1.39	0.000504	0.0248
head development (GO:0060322)	490	259	186.4	+	1.39	1.95e-05	0.00171
cell adhesion (GO:0007155)	589	311	224.06	+	1.39	3.06e-06	0.000328
regulation of cellular response to stress (GO:0080135)	476	251	181.07	+	1.39	3.09e-05	0.00249
heart development (GO:0007507)	386	202	146.84	+	1.38	0.000271	0.0153
tissue morphogenesis (GO:0048729)	455	238	173.09	+	1.38	7.41e-05	0.00514
positive regulation of cellular component organization (GO:0051130)	867	453	329.81	+	1.37	3.99e-08	6.27e-06
negative regulation of cell cycle (GO:0045786)	339	177	128.96	+	1.37	0.000713	0.0337
morphogenesis of an epithelium (GO:0002009)	359	187	136.57	+	1.37	0.000586	0.0282
cellular response to stress (GO:0033554)	1173	611	446.22	+	1.37	1.82e-10	4.21e-08
cellular component morphogenesis (GO:0032989)	603	314	229.39	+	1.37	6.48e-06	0.000649
organelle localization (GO:0051640)	394	205	149.88	+	1.37	0.000308	0.0167
regulation of cellular component organization (GO:0051128)	1844	953	701.47	+	1.36	1.99e-15	1e-12
positive regulation of cellular component biogenesis (GO:0044089)	401	207	152.54	+	1.36	0.000406	0.0209
cell morphogenesis (GO:0000902)	527	272	200.47	+	1.36	4.91e-05	0.00371
central nervous system development (GO:0007417)	595	307	226.34	+	1.36	1.56e-05	0.00139
peptidyl-amino acid modification (GO:0018193)	749	386	284.92	+	1.35	1.23e-06	0.000144
ncRNA metabolic process (GO:0034660)	418	215	159.01	+	1.35	0.000374	0.0194
cell projection organization (GO:0030030)	811	416	308.51	+	1.35	6.83e-07	8.25e-05
cellular response to nitrogen compound (GO:1901699)	367	188	139.61	+	1.35	0.00109	0.0482
protein modification by small protein conjugation or removal (GO:0070647)	676	346	257.15	+	1.35	7e-06	0.000697
plasma membrane bounded cell projection organization (GO:0120036)	795	406	302.42	+	1.34	1.23e-06	0.000145
gamete generation (GO:0007276)	448	228	170.42	+	1.34	0.000354	0.0187
regulation of cellular localization (GO:0060341)	562	286	213.79	+	1.34	6.82e-05	0.00479
negative regulation of phosphorus metabolic process (GO:0010563)	468	238	178.03	+	1.34	0.000286	0.0159
negative regulation of phosphate metabolic process (GO:0045936)	468	238	178.03	+	1.34	0.000286	0.0159
enzyme linked receptor protein signaling pathway (GO:0007167)	484	246	184.12	+	1.34	0.000221	0.0131
cellular protein localization (GO:0034613)	1037	527	394.48	+	1.34	4.47e-08	6.8e-06
cellular macromolecule localization (GO:0070727)	1045	531	397.52	+	1.34	4.23e-08	6.57e-06
chordate embryonic development (GO:0043009)	513	260	195.15	+	1.33	0.000172	0.0106
movement of cell or subcellular component (GO:0006928)	1029	521	391.44	+	1.33	7.59e-08	1.08e-05
cell morphogenesis involved in differentiation (GO:0000904)	405	205	154.06	+	1.33	0.000964	0.0437
negative regulation of protein modification process (GO:0031400)	494	250	187.92	+	1.33	0.000251	0.0145
neuron projection development (GO:0031175)	481	243	182.98	+	1.33	0.000339	0.018
cell development (GO:0048468)	1251	632	475.89	+	1.33	3.76e-09	7.27e-07
protein modification by small protein conjugation (GO:0032446)	559	282	212.65	+	1.33	0.000122	0.0079
positive regulation of hydrolase activity (GO:0051345)	561	283	213.41	+	1.33	0.000108	0.00714
protein ubiquitination (GO:0016567)	520	262	197.81	+	1.32	0.00022	0.0131
developmental process involved in reproduction (GO:0003006)	505	254	192.11	+	1.32	0.00029	0.016
anatomical structure formation involved in morphogenesis (GO:0048646)	674	339	256.39	+	1.32	2.78e-05	0.00231
embryo development ending in birth or egg hatching (GO:0009792)	523	263	198.95	+	1.32	0.000229	0.0134
regulation of cell projection organization (GO:0031344)	428	215	162.81	+	1.32	0.000949	0.0431
circulatory system development (GO:0072359)	643	323	244.6	+	1.32	4.74e-05	0.0036
mRNA metabolic process (GO:0016071)	454	228	172.7	+	1.32	0.000709	0.0336
RNA processing (GO:0006396)	702	352	267.05	+	1.32	2.48e-05	0.0021
regulation of cellular catabolic process (GO:0031329)	531	266	202	+	1.32	0.000253	0.0145
carboxylic acid metabolic process (GO:0019752)	700	350	266.28	+	1.31	2.82e-05	0.00233
oxoacid metabolic process (GO:0043436)	737	368	280.36	+	1.31	2.05e-05	0.00177
tube morphogenesis (GO:0035239)	503	251	191.34	+	1.31	0.000447	0.0223
organic acid metabolic process (GO:0006082)	752	375	286.07	+	1.31	1.81e-05	0.00161
anatomical structure morphogenesis (GO:0009653)	1668	831	634.52	+	1.31	6.6e-11	1.64e-08
protein localization to organelle (GO:0033365)	460	229	174.99	+	1.31	0.00089	0.0407
regulation of catabolic process (GO:0009894)	615	306	233.95	+	1.31	0.000131	0.0084
regulation of kinase activity (GO:0043549)	668	332	254.11	+	1.31	6.39e-05	0.00459
embryo development (GO:0009790)	803	399	305.47	+	1.31	1.16e-05	0.00107
phosphorus metabolic process (GO:0006793)	1761	874	669.9	+	1.3	3.47e-11	9.08e-09
macromolecule modification (GO:0043412)	2596	1288	987.54	+	1.3	1.71e-16	9.32e-14
cellular protein modification process (GO:0006464)	2420	1199	920.58	+	1.3	3.83e-15	1.87e-12
protein modification process (GO:0036211)	2420	1199	920.58	+	1.3	3.83e-15	1.81e-12
regulation of transferase activity (GO:0051338)	749	371	284.92	+	1.3	3.15e-05	0.00251
phosphate-containing compound metabolic process (GO:0006796)	1703	843	647.83	+	1.3	1.3e-10	3.11e-08
tissue development (GO:0009888)	1220	603	464.1	+	1.3	9.65e-08	1.36e-05
regulation of nervous system development (GO:0051960)	575	284	218.73	+	1.3	0.000312	0.0168
positive regulation of molecular function (GO:0044093)	1306	645	496.81	+	1.3	3.16e-08	5.07e-06
organelle assembly (GO:0070925)	564	278	214.55	+	1.3	0.000424	0.0215
regulation of protein kinase activity (GO:0045859)	617	304	234.71	+	1.3	0.000238	0.0138
epithelium development (GO:0060429)	756	372	287.59	+	1.29	4.51e-05	0.00345
negative regulation of signal transduction (GO:0009968)	931	458	354.16	+	1.29	5.28e-06	0.000541
ion homeostasis (GO:0050801)	553	272	210.36	+	1.29	0.000505	0.0248
cellular macromolecule catabolic process (GO:0044265)	647	318	246.12	+	1.29	0.000185	0.0113
neurogenesis (GO:0022008)	1162	570	442.03	+	1.29	4.52e-07	5.65e-05
response to abiotic stimulus (GO:0009628)	683	335	259.82	+	1.29	0.000133	0.00849
protein localization (GO:0008104)	1434	702	545.5	+	1.29	2.07e-08	3.44e-06
generation of neurons (GO:0048699)	1069	523	406.65	+	1.29	1.93e-06	0.00022
cellular component organization (GO:0016043)	4273	2090	1625.48	+	1.29	1.11e-25	1.21e-22
positive regulation of catalytic activity (GO:0043085)	1043	510	396.76	+	1.29	2.61e-06	0.000286
negative regulation of signaling (GO:0023057)	990	484	376.6	+	1.29	4.73e-06	0.000488
regulation of protein localization (GO:0032880)	657	321	249.93	+	1.28	0.000235	0.0137
neuron development (GO:0048666)	604	295	229.77	+	1.28	0.000421	0.0215
negative regulation of cell communication (GO:0010648)	987	482	375.46	+	1.28	6.03e-06	0.000613
cellular localization (GO:0051641)	1665	812	633.38	+	1.28	2.42e-09	4.95e-07
nervous system development (GO:0007399)	1574	767	598.76	+	1.28	8.34e-09	1.49e-06
animal organ morphogenesis (GO:0009887)	743	362	282.64	+	1.28	0.000105	0.00696
cellular component organization or biogenesis (GO:0071840)	4454	2169	1694.33	+	1.28	4.7e-26	6.03e-23
regulation of multicellular organismal development (GO:2000026)	1415	689	538.28	+	1.28	6.01e-08	8.75e-06
cell migration (GO:0016477)	610	297	232.05	+	1.28	0.000511	0.025
organelle organization (GO:0006996)	2737	1331	1041.17	+	1.28	6.38e-15	2.91e-12
tube development (GO:0035295)	659	320	250.69	+	1.28	0.000316	0.0169
regulation of anatomical structure morphogenesis (GO:0022603)	758	368	288.35	+	1.28	0.000121	0.00786
negative regulation of gene expression (GO:0010629)	1276	617	485.4	+	1.27	6.6e-07	8.04e-05
positive regulation of transport (GO:0051050)	602	291	229	+	1.27	0.000812	0.0375
regulation of intracellular signal transduction (GO:1902531)	1363	657	518.49	+	1.27	3.72e-07	4.7e-05
regulation of response to stress (GO:0080134)	932	449	354.54	+	1.27	3.55e-05	0.00277
localization of cell (GO:0051674)	692	333	263.24	+	1.26	0.000425	0.0214
cell motility (GO:0048870)	692	333	263.24	+	1.26	0.000425	0.0214
macromolecule localization (GO:0033036)	1707	821	649.35	+	1.26	1.2e-08	2.09e-06
regulation of cell development (GO:0060284)	604	290	229.77	+	1.26	0.00108	0.0478
chromosome organization (GO:0051276)	911	437	346.55	+	1.26	5.69e-05	0.00416
neuron differentiation (GO:0030182)	738	354	280.74	+	1.26	0.00033	0.0175
nucleic acid metabolic process (GO:0090304)	2527	1210	961.29	+	1.26	3.74e-12	1.13e-09
chemical homeostasis (GO:0048878)	765	366	291.01	+	1.26	0.000282	0.0157
nucleobase-containing compound metabolic process (GO:0006139)	2987	1426	1136.27	+	1.25	4.33e-14	1.75e-11
negative regulation of metabolic process (GO:0009892)	2230	1060	848.31	+	1.25	4.22e-10	9.17e-08
heterocycle metabolic process (GO:0046483)	3101	1474	1179.64	+	1.25	4.43e-14	1.74e-11
negative regulation of response to stimulus (GO:0048585)	1178	559	448.12	+	1.25	1.22e-05	0.00112
positive regulation of developmental process (GO:0051094)	980	465	372.8	+	1.25	7.64e-05	0.00526
cellular component assembly (GO:0022607)	1876	890	713.64	+	1.25	2.05e-08	3.45e-06
regulation of phosphorus metabolic process (GO:0051174)	1420	673	540.18	+	1.25	1.62e-06	0.000186
negative regulation of nucleobase-containing compound metabolic process (GO:0045934)	1136	538	432.14	+	1.24	2.12e-05	0.00181
developmental process (GO:0032502)	4084	1932	1553.58	+	1.24	2.65e-18	1.7e-15
anatomical structure development (GO:0048856)	3839	1816	1460.38	+	1.24	4.92e-17	2.78e-14
regulation of protein modification process (GO:0031399)	1482	701	563.76	+	1.24	1.08e-06	0.000128
regulation of phosphate metabolic process (GO:0019220)	1415	669	538.28	+	1.24	2.26e-06	0.000255
negative regulation of macromolecule metabolic process (GO:0010605)	2072	979	788.2	+	1.24	6.03e-09	1.11e-06
cellular developmental process (GO:0048869)	2722	1285	1035.47	+	1.24	1.37e-11	3.78e-09
cellular aromatic compound metabolic process (GO:0006725)	3140	1482	1194.48	+	1.24	1.92e-13	6.8e-11
regulation of developmental process (GO:0050793)	1885	889	717.07	+	1.24	4.6e-08	6.92e-06
negative regulation of biological process (GO:0048519)	3995	1884	1519.72	+	1.24	2.33e-17	1.37e-14
negative regulation of cellular process (GO:0048523)	3643	1718	1385.82	+	1.24	1.17e-15	6.12e-13
system development (GO:0048731)	3107	1465	1181.92	+	1.24	3.82e-13	1.29e-10
carbohydrate derivative metabolic process (GO:1901135)	842	397	320.3	+	1.24	0.000398	0.0205
regulation of phosphorylation (GO:0042325)	1237	583	470.56	+	1.24	1.47e-05	0.00133
cellular component biogenesis (GO:0044085)	2078	979	790.48	+	1.24	9.12e-09	1.61e-06
cell differentiation (GO:0030154)	2646	1246	1006.56	+	1.24	4.83e-11	1.24e-08
establishment of localization in cell (GO:0051649)	1168	550	444.31	+	1.24	2.67e-05	0.00223
regulation of localization (GO:0032879)	1975	930	751.3	+	1.24	2.51e-08	4.13e-06
organic cyclic compound metabolic process (GO:1901360)	3291	1549	1251.92	+	1.24	8.49e-14	3.16e-11
multicellular organism development (GO:0007275)	3483	1639	1324.96	+	1.24	1.29e-14	5.35e-12
reproductive process (GO:0022414)	936	440	356.06	+	1.24	0.00021	0.0126
regulation of protein phosphorylation (GO:0001932)	1154	542	438.99	+	1.23	3.89e-05	0.003
reproduction (GO:0000003)	937	440	356.44	+	1.23	0.000237	0.0138
animal organ development (GO:0048513)	2215	1040	842.6	+	1.23	4.66e-09	8.79e-07
positive regulation of multicellular organismal process (GO:0051240)	1187	557	451.54	+	1.23	3.41e-05	0.00268
regulation of multicellular organismal process (GO:0051239)	2170	1018	825.48	+	1.23	8.12e-09	1.47e-06
cellular protein metabolic process (GO:0044267)	3105	1456	1181.16	+	1.23	1.55e-12	4.86e-10
negative regulation of cellular metabolic process (GO:0031324)	2059	965	783.26	+	1.23	2.71e-08	4.4e-06
negative regulation of cellular biosynthetic process (GO:0031327)	1165	545	443.17	+	1.23	5.28e-05	0.00397
locomotion (GO:0040011)	864	404	328.67	+	1.23	0.000586	0.0281
negative regulation of macromolecule biosynthetic process (GO:0010558)	1123	525	427.2	+	1.23	8.03e-05	0.00548
regulation of catalytic activity (GO:0050790)	1845	862	701.85	+	1.23	2.41e-07	3.1e-05
regulation of transport (GO:0051049)	1257	587	478.17	+	1.23	3.03e-05	0.00246
regulation of hydrolase activity (GO:0051336)	1041	486	396	+	1.23	0.000167	0.0103
negative regulation of cellular macromolecule biosynthetic process (GO:2000113)	1084	506	412.36	+	1.23	0.000111	0.0073
cellular macromolecule metabolic process (GO:0044260)	4839	2255	1840.79	+	1.23	2.09e-19	1.56e-16
negative regulation of biosynthetic process (GO:0009890)	1180	549	448.88	+	1.22	7.32e-05	0.0051
RNA metabolic process (GO:0016070)	2059	956	783.26	+	1.22	1.11e-07	1.54e-05
positive regulation of cellular protein metabolic process (GO:0032270)	1198	556	455.73	+	1.22	8.17e-05	0.00555
regulation of biological quality (GO:0065008)	2881	1337	1095.95	+	1.22	1.45e-10	3.41e-08
homeostatic process (GO:0042592)	1188	551	451.92	+	1.22	9.62e-05	0.00644
protein-containing complex subunit organization (GO:0043933)	1340	621	509.74	+	1.22	3.22e-05	0.00256
negative regulation of RNA metabolic process (GO:0051253)	1034	479	393.34	+	1.22	0.000314	0.0168
positive regulation of protein modification process (GO:0031401)	935	433	355.68	+	1.22	0.000653	0.0311
small molecule metabolic process (GO:0044281)	1433	663	545.12	+	1.22	2.05e-05	0.00178
positive regulation of cell communication (GO:0010647)	1194	552	454.21	+	1.22	0.000112	0.0073
organic substance catabolic process (GO:1901575)	1285	594	488.82	+	1.22	6.31e-05	0.00455
negative regulation of nitrogen compound metabolic process (GO:0051172)	1930	892	734.18	+	1.21	6.34e-07	7.79e-05
positive regulation of protein metabolic process (GO:0051247)	1278	589	486.16	+	1.21	8.41e-05	0.00569
positive regulation of signaling (GO:0023056)	1200	553	456.49	+	1.21	0.000144	0.00906
positive regulation of nucleobase-containing compound metabolic process (GO:0045935)	1471	677	559.58	+	1.21	2.55e-05	0.00215
positive regulation of cellular process (GO:0048522)	4026	1850	1531.52	+	1.21	1.19e-13	4.3e-11
macromolecule metabolic process (GO:0043170)	6021	2762	2290.43	+	1.21	8.25e-22	6.86e-19
positive regulation of signal transduction (GO:0009967)	1101	505	418.83	+	1.21	0.000413	0.0212
positive regulation of macromolecule biosynthetic process (GO:0010557)	1430	655	543.98	+	1.2	5.35e-05	0.00398
establishment of protein localization (GO:0045184)	963	441	366.33	+	1.2	0.00106	0.0474
positive regulation of biological process (GO:0048518)	4501	2059	1712.21	+	1.2	8.41e-15	3.72e-12
primary metabolic process (GO:0044238)	7283	3328	2770.5	+	1.2	3.03e-27	4.28e-24
protein metabolic process (GO:0019538)	3788	1730	1440.98	+	1.2	5.22e-12	1.54e-09
positive regulation of cellular biosynthetic process (GO:0031328)	1489	680	566.43	+	1.2	5.29e-05	0.00396
positive regulation of biosynthetic process (GO:0009891)	1507	686	573.27	+	1.2	6.42e-05	0.00458
positive regulation of RNA metabolic process (GO:0051254)	1325	603	504.04	+	1.2	0.000203	0.0122
regulation of cell communication (GO:0010646)	2661	1211	1012.26	+	1.2	4.46e-08	6.85e-06
regulation of signal transduction (GO:0009966)	2442	1111	928.95	+	1.2	2.01e-07	2.64e-05
positive regulation of RNA biosynthetic process (GO:1902680)	1264	575	480.83	+	1.2	0.000277	0.0156
positive regulation of nucleic acid-templated transcription (GO:1903508)	1264	575	480.83	+	1.2	0.000277	0.0155
positive regulation of transcription, DNA-templated (GO:0045893)	1262	574	480.07	+	1.2	0.000303	0.0165
regulation of cell differentiation (GO:0045595)	1255	570	477.41	+	1.19	0.000359	0.0188
positive regulation of cellular metabolic process (GO:0031325)	2524	1146	960.15	+	1.19	1.57e-07	2.1e-05
positive regulation of gene expression (GO:0010628)	1553	705	590.77	+	1.19	6.54e-05	0.00465
positive regulation of macromolecule metabolic process (GO:0010604)	2540	1153	966.23	+	1.19	1.53e-07	2.05e-05
regulation of signaling (GO:0023051)	2688	1220	1022.53	+	1.19	5.63e-08	8.29e-06
positive regulation of nitrogen compound metabolic process (GO:0051173)	2435	1105	926.29	+	1.19	2.97e-07	3.78e-05
positive regulation of metabolic process (GO:0009893)	2691	1221	1023.67	+	1.19	6.33e-08	9.13e-06
nitrogen compound metabolic process (GO:0006807)	6723	3050	2557.47	+	1.19	2.04e-22	1.8e-19
cellular metabolic process (GO:0044237)	7178	3256	2730.56	+	1.19	1.44e-24	1.45e-21
cellular catabolic process (GO:0044248)	1311	594	498.71	+	1.19	0.000313	0.0168
regulation of cellular protein metabolic process (GO:0032268)	2147	972	816.73	+	1.19	2.62e-06	0.000284
catabolic process (GO:0009056)	1463	662	556.53	+	1.19	0.000143	0.00907
cellular nitrogen compound metabolic process (GO:0034641)	3664	1657	1393.81	+	1.19	1.86e-10	4.24e-08
organic substance metabolic process (GO:0071704)	7633	3451	2903.64	+	1.19	6.98e-26	8.23e-23
regulation of protein metabolic process (GO:0051246)	2290	1035	871.13	+	1.19	1.33e-06	0.000154
regulation of response to stimulus (GO:0048583)	3065	1384	1165.95	+	1.19	1.43e-08	2.47e-06
positive regulation of response to stimulus (GO:0048584)	1520	686	578.22	+	1.19	0.000138	0.00876
regulation of gene expression (GO:0010468)	3564	1607	1355.77	+	1.19	7.55e-10	1.59e-07
protein-containing complex assembly (GO:0065003)	1193	536	453.83	+	1.18	0.00107	0.0477
nucleobase-containing compound biosynthetic process (GO:0034654)	1572	706	598	+	1.18	0.000157	0.00977
regulation of transcription by RNA polymerase II (GO:0006357)	1687	757	641.75	+	1.18	9.74e-05	0.0065
organonitrogen compound metabolic process (GO:1901564)	4652	2079	1769.65	+	1.17	6.49e-12	1.87e-09
regulation of nucleobase-containing compound metabolic process (GO:0019219)	3295	1472	1253.44	+	1.17	3.23e-08	5.13e-06
regulation of metabolic process (GO:0019222)	5366	2395	2041.26	+	1.17	7.23e-14	2.76e-11
heterocycle biosynthetic process (GO:0018130)	1635	729	621.96	+	1.17	0.000244	0.0141
regulation of macromolecule metabolic process (GO:0060255)	5041	2244	1917.63	+	1.17	1.71e-12	5.24e-10
aromatic compound biosynthetic process (GO:0019438)	1638	729	623.11	+	1.17	0.00027	0.0154
regulation of cellular macromolecule biosynthetic process (GO:2000112)	3195	1421	1215.4	+	1.17	1.3e-07	1.77e-05
organic cyclic compound biosynthetic process (GO:1901362)	1735	771	660.01	+	1.17	0.000205	0.0124
metabolic process (GO:0008152)	8261	3666	3142.54	+	1.17	2.93e-23	2.76e-20
response to stress (GO:0006950)	2362	1048	898.52	+	1.17	1.33e-05	0.00121
regulation of molecular function (GO:0065009)	2639	1170	1003.89	+	1.17	3.9e-06	0.000405
regulation of biosynthetic process (GO:0009889)	3386	1501	1288.06	+	1.17	9.67e-08	1.35e-05
regulation of cellular biosynthetic process (GO:0031326)	3350	1485	1274.36	+	1.17	1.14e-07	1.56e-05
regulation of macromolecule biosynthetic process (GO:0010556)	3257	1443	1238.98	+	1.16	1.95e-07	2.57e-05
regulation of cellular metabolic process (GO:0031323)	5061	2237	1925.24	+	1.16	1.62e-11	4.41e-09
localization (GO:0051179)	4170	1842	1586.3	+	1.16	3.27e-09	6.42e-07
regulation of primary metabolic process (GO:0080090)	4946	2183	1881.49	+	1.16	5.25e-11	1.32e-08
regulation of RNA metabolic process (GO:0051252)	3063	1346	1165.19	+	1.16	2.32e-06	0.000258
regulation of nitrogen compound metabolic process (GO:0051171)	4848	2130	1844.21	+	1.15	3.47e-10	7.66e-08
gene expression (GO:0010467)	2460	1079	935.8	+	1.15	4.05e-05	0.00311
regulation of transcription, DNA-templated (GO:0006355)	2879	1261	1095.19	+	1.15	8.36e-06	0.00081
regulation of nucleic acid-templated transcription (GO:1903506)	2889	1264	1098.99	+	1.15	9.38e-06	0.000896
regulation of RNA biosynthetic process (GO:2001141)	2894	1265	1100.9	+	1.15	1.13e-05	0.00105
cellular biosynthetic process (GO:0044249)	2995	1289	1139.32	+	1.13	7.26e-05	0.00508
establishment of localization (GO:0051234)	3279	1405	1247.35	+	1.13	5.42e-05	0.00401
biosynthetic process (GO:0009058)	3132	1342	1191.43	+	1.13	9.05e-05	0.00609
organic substance biosynthetic process (GO:1901576)	3063	1308	1165.19	+	1.12	0.000176	0.0108
transport (GO:0006810)	3158	1328	1201.32	+	1.11	0.000986	0.0445
cellular process (GO:0009987)	13729	5712	5222.6	+	1.09	1.47e-21	1.16e-18
biological regulation (GO:0065007)	11094	4578	4220.23	+	1.08	2.74e-11	7.32e-09
regulation of biological process (GO:0050789)	10422	4280	3964.6	+	1.08	4.57e-09	8.73e-07
regulation of cellular process (GO:0050794)	9867	4032	3753.47	+	1.07	2.03e-07	2.64e-05
biological_process (GO:0008150)	17363	6983	6605	+	1.06	3.83e-19	2.71e-16
response to chemical (GO:0042221)	3604	1204	1370.99	-	0.88	1.9e-05	0.00168
Unclassified (UNCLASSIFIED)	4624	1381	1759	-	0.79	3.83e-19	2.58e-16
system process (GO:0003008)	2043	592	777.17	-	0.76	5.2e-10	1.11e-07
nervous system process (GO:0050877)	1646	402	626.15	-	0.64	1.18e-17	7.27e-15
nucleosome assembly (GO:0006334)	166	35	63.15	-	0.55	0.0011	0.0484
sensory perception (GO:0007600)	1355	260	515.45	-	0.5	9.6e-29	1.51e-25
G-protein coupled receptor signaling pathway (GO:0007186)	1681	302	639.46	-	0.47	4.77e-41	8.43e-38
detection of stimulus (GO:0051606)	1120	156	426.06	-	0.37	1.67e-41	3.37e-38
natural killer cell activation (GO:0030101)	69	8	26.25	-	0.3	0.000459	0.0228
detection of stimulus involved in sensory perception (GO:0050906)	1044	118	397.14	-	0.3	9.63e-50	2.27e-46
sensory perception of chemical stimulus (GO:0007606)	1072	119	407.8	-	0.29	5.7e-52	1.61e-48
detection of chemical stimulus (GO:0009593)	1024	107	389.54	-	0.27	8.56e-53	3.03e-49
sensory perception of smell (GO:0007608)	997	99	379.27	-	0.26	8.56e-54	4.03e-50
detection of chemical stimulus involved in sensory perception (GO:0050907)	1003	96	381.55	-	0.25	4.3e-56	3.04e-52
detection of chemical stimulus involved in sensory perception of smell (GO:0050911)	973	86	370.14	-	0.23	4.56e-58	6.45e-54
natural killer cell activation involved in immune response (GO:0002323)	48	4	18.26	-	0.22	0.00054	0.0261

## Sheet: Reactome Pathways
Analysis Type:	PANTHER Overrepresentation Test (Released 20171205)
Annotation Version and Release Date:	Reactome version 58 Released 2016-12-07
Analyzed List:	Client Text Box Input (Bos taurus)	There are duplicate IDs in the file. The unique set of IDs will be used.
Reference List:	Bos taurus (all genes in database)
Test Type:	FISHER
Reactome pathways	Bos taurus - REFLIST (21987)	Client Text Box Input (8364)	Client Text Box Input (expected)	Client Text Box Input (over/under)	Client Text Box Input (fold Enrichment)	Client Text Box Input (raw P-value)	Client Text Box Input (FDR)
Extracellular matrix organization (R-BTA-1474244)	209	121	79.5	+	1.52	0.000312	0.0456
Signaling by Rho GTPases (R-BTA-194315)	320	181	121.73	+	1.49	2.69e-05	0.00787
Cell Cycle (R-BTA-1640170)	479	245	182.21	+	1.34	0.000175	0.0285
Unclassified (UNCLASSIFIED)	14707	5330	5594.64	-	0.95	2.2e-07	8.06e-05
Signaling by GPCR (R-BTA-372790)	1160	301	441.27	-	0.68	3.97e-10	1.94e-07
GPCR ligand binding (R-BTA-500792)	330	76	125.53	-	0.61	4.17e-05	0.0102
Class A/1 (Rhodopsin-like receptors) (R-BTA-373076)	261	57	99.29	-	0.57	6.66e-05	0.0122
GPCR downstream signaling (R-BTA-388396)	924	197	351.5	-	0.56	2.01e-15	1.47e-12
Peptide ligand-binding receptors (R-BTA-375276)	163	29	62.01	-	0.47	6.28e-05	0.0131
Olfactory Signaling Pathway (R-BTA-381753)	474	44	180.31	-	0.24	1.81e-27	2.65e-24
Degradation of GABA (R-BTA-916853)	2	2	0.76	+	2.63	0.306	1.06
Organic anion transport (R-BTA-561048)	4	4	1.52	+	2.63	0.228	1.04
CYP2E1 reactions (R-BTA-211999)	1	1	0.38	+	2.63	0.475	1.09
POLB-Dependent Long Patch Base Excision Repair (R-BTA-110362)	5	5	1.9	+	2.63	0.151	0.95
Aromatic amines can be N-hydroxylated or N-dealkylated by CYP1A2 (R-BTA-211957)	1	1	0.38	+	2.63	0.475	1.08
Hyaluronan biosynthesis and export (R-BTA-2142850)	4	4	1.52	+	2.63	0.228	1.04
Peptide chain elongation (R-BTA-156902)	1	1	0.38	+	2.63	0.475	1.08
Biogenic amines are oxidatively deaminated to aldehydes by MAOA and MAOB (R-BTA-141333)	1	1	0.38	+	2.63	0.475	1.08
Reactions specific to the hybrid N-glycan synthesis pathway (R-BTA-975574)	1	1	0.38	+	2.63	0.475	1.08
Activation of Na-permeable Kainate Receptors (R-BTA-451307)	2	2	0.76	+	2.63	0.306	1.05
Agmatine biosynthesis (R-BTA-351143)	2	2	0.76	+	2.63	0.306	1.05
Dopamine clearance from the synaptic cleft (R-BTA-379401)	1	1	0.38	+	2.63	0.475	1.08
Extrinsic Pathway of Fibrin Clot Formation (R-BTA-140834)	4	4	1.52	+	2.63	0.228	1.04
LRR FLII-interacting protein 1 (LRRFIP1) activates type I IFN production (R-BTA-3134973)	4	4	1.52	+	2.63	0.228	1.04
Regulation of gene expression in beta cells (R-BTA-210745)	2	2	0.76	+	2.63	0.306	1.05
Signalling to ERK5 (R-BTA-198765)	1	1	0.38	+	2.63	0.475	1.08
PERK regulates gene expression (R-BTA-381042)	2	2	0.76	+	2.63	0.306	1.05
Localization of the PINCH-ILK-PARVIN complex to focal adhesions (R-BTA-446343)	2	2	0.76	+	2.63	0.306	1.04
Metabolism of ingested MeSeO2H into MeSeH (R-BTA-5263617)	1	1	0.38	+	2.63	0.475	1.07
phospho-PLA2 pathway (R-BTA-111995)	1	1	0.38	+	2.63	0.475	1.07
Metabolism of ingested H2SeO4 and H2SeO3 into H2Se (R-BTA-2408550)	1	1	0.38	+	2.63	0.475	1.07
Mitochondrial ABC transporters (R-BTA-1369007)	2	2	0.76	+	2.63	0.306	1.04
COX reactions (R-BTA-140180)	1	1	0.38	+	2.63	0.475	1.07
Electron transport from NADPH to Ferredoxin (R-BTA-2395516)	1	1	0.38	+	2.63	0.475	1.07
Proline catabolism (R-BTA-70688)	2	2	0.76	+	2.63	0.306	1.04
Abasic sugar-phosphate removal via the single-nucleotide replacement pathway (R-BTA-73930)	1	1	0.38	+	2.63	0.475	1.07
Formation of editosomes by ADAR proteins (R-BTA-77042)	2	2	0.76	+	2.63	0.306	1.04
Enzymatic degradation of Dopamine by monoamine oxidase (R-BTA-379398)	1	1	0.38	+	2.63	0.475	1.06
Enzymatic degradation of dopamine by COMT (R-BTA-379397)	1	1	0.38	+	2.63	0.475	1.06
AKT-mediated inactivation of FOXO1A (R-BTA-211163)	2	2	0.76	+	2.63	0.306	1.03
PDE3B signalling (R-BTA-165160)	1	1	0.38	+	2.63	0.475	1.06
TET1,2,3 and TDG demethylate DNA (R-BTA-5221030)	1	1	0.38	+	2.63	0.475	1.06
C6 deamination of adenosine (R-BTA-75102)	2	2	0.76	+	2.63	0.306	1.03
IRF3 mediated activation of type 1 IFN (R-BTA-1606341)	1	1	0.38	+	2.63	0.475	1.06
Synthesis of CL (R-BTA-1483076)	1	1	0.38	+	2.63	0.475	1.06
TWIK-related spinal cord K+ channel (TRESK) (R-BTA-1299344)	1	1	0.38	+	2.63	0.475	1.05
HCN channels (R-BTA-1296061)	4	4	1.52	+	2.63	0.228	1.03
Interleukin-1 processing (R-BTA-448706)	1	1	0.38	+	2.63	0.475	1.05
mRNA Editing: A to I Conversion (R-BTA-75064)	2	2	0.76	+	2.63	0.306	1.03
Resolution of AP sites via the single-nucleotide replacement pathway (R-BTA-110381)	3	3	1.14	+	2.63	0.356	1.06
Utilization of Ketone Bodies (R-BTA-77108)	3	3	1.14	+	2.63	0.356	1.06
Synthesis of 15-eicosatetraenoic acid derivatives (R-BTA-2142770)	3	3	1.14	+	2.63	0.356	1.06
Beta oxidation of butanoyl-CoA to acetyl-CoA (R-BTA-77352)	3	3	1.14	+	2.63	0.356	1.05
Mitochondrial transcription initiation (R-BTA-163282)	3	3	1.14	+	2.63	0.356	1.05
Assembly of the ORC complex at the origin of replication (R-BTA-68616)	6	6	2.28	+	2.63	0.104	0.829
Progressive trimming of alpha-1,2-linked mannose residues from Man9/8/7GlcNAc2 to produce Man5GlcNAc2 (R-BTA-964827)	3	3	1.14	+	2.63	0.356	1.05
Zinc efflux and compartmentalization by the SLC30 family (R-BTA-435368)	3	3	1.14	+	2.63	0.356	1.05
Recruitment of NuMA to mitotic centrosomes (R-BTA-380320)	10	9	3.8	+	2.37	0.0697	0.679
Ketone body metabolism (R-BTA-74182)	8	7	3.04	+	2.3	0.143	0.92
Downregulation of ERBB2:ERBB3 signaling (R-BTA-1358803)	8	7	3.04	+	2.3	0.143	0.916
mitochondrial fatty acid beta-oxidation of saturated fatty acids (R-BTA-77286)	8	7	3.04	+	2.3	0.143	0.912
Laminin interactions (R-BTA-3000157)	23	20	8.75	+	2.29	0.00931	0.332
Mitotic Telophase/Cytokinesis (R-BTA-68884)	14	12	5.33	+	2.25	0.0459	0.569
Synthesis of Ketone Bodies (R-BTA-77111)	7	6	2.66	+	2.25	0.209	1.03
TP53 Regulates Transcription of Genes Involved in G2 Cell Cycle Arrest (R-BTA-6804114)	7	6	2.66	+	2.25	0.209	1.03
Cation-coupled Chloride cotransporters (R-BTA-426117)	7	6	2.66	+	2.25	0.209	1.03
TRP channels (R-BTA-3295583)	25	21	9.51	+	2.21	0.0081	0.32
Vitamins (R-BTA-211916)	6	5	2.28	+	2.19	0.189	1.03
FGFRL1 modulation of FGFR1 signaling (R-BTA-5658623)	6	5	2.28	+	2.19	0.189	1.02
Crosslinking of collagen fibrils (R-BTA-2243919)	6	5	2.28	+	2.19	0.189	1.02
Vitamin D (calciferol) metabolism (R-BTA-196791)	6	5	2.28	+	2.19	0.189	1.01
Anchoring fibril formation (R-BTA-2214320)	11	9	4.18	+	2.15	0.129	0.864
Synthesis of PIPs at the late endosome membrane (R-BTA-1660517)	10	8	3.8	+	2.1	0.117	0.817
GRB7 events in ERBB2 signaling (R-BTA-1306955)	5	4	1.9	+	2.1	0.272	1.05
Type I hemidesmosome assembly (R-BTA-446107)	10	8	3.8	+	2.1	0.117	0.813
RSK activation (R-BTA-444257)	5	4	1.9	+	2.1	0.272	1.05
PTK6 Regulates Proteins Involved in RNA Processing (R-BTA-8849468)	5	4	1.9	+	2.1	0.272	1.04
NCAM1 interactions (R-BTA-419037)	15	12	5.71	+	2.1	0.0547	0.588
Galactose catabolism (R-BTA-70370)	5	4	1.9	+	2.1	0.272	1.04
Activation of NIMA Kinases NEK9, NEK6, NEK7 (R-BTA-2980767)	5	4	1.9	+	2.1	0.272	1.04
Beta oxidation of hexanoyl-CoA to butanoyl-CoA (R-BTA-77350)	5	4	1.9	+	2.1	0.272	1.04
Beta oxidation of octanoyl-CoA to hexanoyl-CoA (R-BTA-77348)	5	4	1.9	+	2.1	0.272	1.03
Beta oxidation of decanoyl-CoA to octanoyl-CoA-CoA (R-BTA-77346)	5	4	1.9	+	2.1	0.272	1.03
Beta oxidation of lauroyl-CoA to decanoyl-CoA-CoA (R-BTA-77310)	5	4	1.9	+	2.1	0.272	1.03
Cohesin Loading onto Chromatin (R-BTA-2470946)	10	8	3.8	+	2.1	0.117	0.809
Purine ribonucleoside monophosphate biosynthesis (R-BTA-73817)	10	8	3.8	+	2.1	0.117	0.805
Role of Abl in Robo-Slit signaling (R-BTA-428890)	5	4	1.9	+	2.1	0.272	1.03
Kinesins (R-BTA-983189)	19	15	7.23	+	2.08	0.0354	0.54
Activation of SMO (R-BTA-5635838)	9	7	3.42	+	2.04	0.164	0.984
HDR through MMEJ (alt-NHEJ) (R-BTA-5685939)	9	7	3.42	+	2.04	0.164	0.98
Dissolution of Fibrin Clot (R-BTA-75205)	9	7	3.42	+	2.04	0.164	0.976
Adenylate cyclase activating pathway (R-BTA-170660)	9	7	3.42	+	2.04	0.164	0.972
Transcription from mitochondrial promoters (R-BTA-75944)	4	3	1.52	+	1.97	0.403	1.09
Clearance of Nuclear Envelope Membranes from Chromatin (R-BTA-2993913)	4	3	1.52	+	1.97	0.403	1.09
STING mediated induction of host immune responses (R-BTA-1834941)	4	3	1.52	+	1.97	0.403	1.09
Reelin signalling pathway (R-BTA-8866376)	4	3	1.52	+	1.97	0.403	1.08
Scavenging by Class H Receptors (R-BTA-3000497)	4	3	1.52	+	1.97	0.403	1.08
SUMOylation of chromatin organization proteins (R-BTA-4551638)	4	3	1.52	+	1.97	0.403	1.08
Astrocytic Glutamate-Glutamine Uptake And Metabolism (R-BTA-210455)	4	3	1.52	+	1.97	0.403	1.08
NGF processing (R-BTA-167060)	4	3	1.52	+	1.97	0.403	1.08
G2/M DNA replication checkpoint (R-BTA-69478)	4	3	1.52	+	1.97	0.403	1.07
Release of Hh-Np from the secreting cell (R-BTA-5362798)	4	3	1.52	+	1.97	0.403	1.07
Neurofascin interactions (R-BTA-447043)	4	3	1.52	+	1.97	0.403	1.07
Neurotransmitter uptake and Metabolism In Glial Cells (R-BTA-112313)	4	3	1.52	+	1.97	0.403	1.07
Neurotransmitter Clearance In The Synaptic Cleft (R-BTA-112311)	4	3	1.52	+	1.97	0.403	1.07
TP53 Regulates Transcription of Caspase Activators and Caspases (R-BTA-6803207)	4	3	1.52	+	1.97	0.403	1.06
SUMO is transferred from E1 to E2 (UBE2I, UBC9) (R-BTA-3065678)	4	3	1.52	+	1.97	0.403	1.06
Recycling of eIF2:GDP (R-BTA-72731)	8	6	3.04	+	1.97	0.231	1.04
mRNA Editing (R-BTA-75072)	4	3	1.52	+	1.97	0.403	1.06
Caspase-mediated cleavage of cytoskeletal proteins (R-BTA-264870)	12	9	4.56	+	1.97	0.141	0.916
Regulation of KIT signaling (R-BTA-1433559)	12	9	4.56	+	1.97	0.141	0.912
Unblocking of NMDA receptor, glutamate binding and activation (R-BTA-438066)	15	11	5.71	+	1.93	0.121	0.829
Glycolysis (R-BTA-70171)	26	19	9.89	+	1.92	0.0432	0.574
ECM proteoglycans (R-BTA-3000178)	37	27	14.08	+	1.92	0.0114	0.327
Signaling by Robo receptor (R-BTA-376176)	11	8	4.18	+	1.91	0.196	1.02
SALM protein interactions at the synapses (R-BTA-8849932)	18	13	6.85	+	1.9	0.105	0.797
ChREBP activates metabolic gene expression (R-BTA-163765)	7	5	2.66	+	1.88	0.331	1.05
Multifunctional anion exchangers (R-BTA-427601)	7	5	2.66	+	1.88	0.331	1.05
AKT phosphorylates targets in the nucleus (R-BTA-198693)	7	5	2.66	+	1.88	0.331	1.04
Glycogen breakdown (glycogenolysis) (R-BTA-70221)	14	10	5.33	+	1.88	0.167	0.977
Apoptotic cleavage of cellular proteins (R-BTA-111465)	31	22	11.79	+	1.87	0.0302	0.514
WNT ligand biogenesis and trafficking (R-BTA-3238698)	24	17	9.13	+	1.86	0.0541	0.594
Effects of PIP2 hydrolysis (R-BTA-114508)	24	17	9.13	+	1.86	0.0541	0.59
Synthesis of PIPs at the plasma membrane (R-BTA-1660499)	34	24	12.93	+	1.86	0.0262	0.517
Activation of Ca-permeable Kainate Receptor (R-BTA-451308)	10	7	3.8	+	1.84	0.274	1.03
Ionotropic activity of Kainate Receptors (R-BTA-451306)	10	7	3.8	+	1.84	0.274	1.03
Platelet Adhesion to exposed collagen (R-BTA-75892)	10	7	3.8	+	1.84	0.274	1.03
DNA Damage Recognition in GG-NER (R-BTA-5696394)	36	25	13.69	+	1.83	0.0219	0.464
CREB phosphorylation through the activation of CaMKII (R-BTA-442729)	13	9	4.95	+	1.82	0.16	0.976
Condensation of Prophase Chromosomes (R-BTA-2299718)	16	11	6.09	+	1.81	0.134	0.884
Tie2 Signaling (R-BTA-210993)	16	11	6.09	+	1.81	0.134	0.88
CDO in myogenesis (R-BTA-375170)	19	13	7.23	+	1.8	0.113	0.816
Regulation of TP53 Activity through Acetylation (R-BTA-6804758)	19	13	7.23	+	1.8	0.113	0.812
Myogenesis (R-BTA-525793)	19	13	7.23	+	1.8	0.113	0.808
Stimuli-sensing channels (R-BTA-2672351)	88	60	33.48	+	1.79	0.00061	0.0743
Smooth Muscle Contraction (R-BTA-445355)	25	17	9.51	+	1.79	0.0819	0.735
Synthesis of IP3 and IP4 in the cytosol (R-BTA-1855204)	25	17	9.51	+	1.79	0.0819	0.73
Collagen biosynthesis and modifying enzymes (R-BTA-1650814)	55	37	20.92	+	1.77	0.00965	0.336
Chk1/Chk2(Cds1) mediated inactivation of Cyclin B:Cdk1 complex (R-BTA-75035)	9	6	3.42	+	1.75	0.263	1.08
Beta-oxidation of pristanoyl-CoA (R-BTA-389887)	9	6	3.42	+	1.75	0.263	1.08
O-glycosylation of TSR domain-containing proteins (R-BTA-5173214)	9	6	3.42	+	1.75	0.263	1.07
Digestion of dietary lipid (R-BTA-192456)	9	6	3.42	+	1.75	0.263	1.07
CD28 dependent PI3K/Akt signaling (R-BTA-389357)	18	12	6.85	+	1.75	0.151	0.951
Ras activation uopn Ca2+ infux through NMDA receptor (R-BTA-442982)	15	10	5.71	+	1.75	0.18	1.02
Netrin-1 signaling (R-BTA-373752)	15	10	5.71	+	1.75	0.18	1.02
Translocation of GLUT4 to the plasma membrane (R-BTA-1445148)	12	8	4.56	+	1.75	0.216	1.04
Formation of the active cofactor, UDP-glucuronate (R-BTA-173599)	3	2	1.14	+	1.75	0.621	1.11
RHO GTPases regulate CFTR trafficking (R-BTA-5627083)	3	2	1.14	+	1.75	0.621	1.11
VLDL biosynthesis (R-BTA-8866423)	3	2	1.14	+	1.75	0.621	1.1
APEX1-Independent Resolution of AP Sites via the Single Nucleotide Replacement Pathway (R-BTA-5649702)	6	4	2.28	+	1.75	0.478	1.06
Norepinephrine Neurotransmitter Release Cycle (R-BTA-181430)	3	2	1.14	+	1.75	0.621	1.1
Interconversion of 2-oxoglutarate and 2-hydroxyglutarate (R-BTA-880009)	3	2	1.14	+	1.75	0.621	1.1
Lactose synthesis (R-BTA-5653890)	3	2	1.14	+	1.75	0.621	1.1
Trafficking of dietary sterols (R-BTA-265473)	3	2	1.14	+	1.75	0.621	1.1
Phosphorylation of Emi1 (R-BTA-176417)	6	4	2.28	+	1.75	0.478	1.06
Breakdown of the nuclear lamina (R-BTA-352238)	3	2	1.14	+	1.75	0.621	1.1
Serotonin clearance from the synaptic cleft (R-BTA-380615)	3	2	1.14	+	1.75	0.621	1.1
Phosphorylation of proteins involved in G1/S transition by active Cyclin E:Cdk2 complexes (R-BTA-69200)	3	2	1.14	+	1.75	0.621	1.1
ARL13B-mediated ciliary trafficking of INPP5E (R-BTA-5624958)	3	2	1.14	+	1.75	0.621	1.09
Abacavir metabolism (R-BTA-2161541)	3	2	1.14	+	1.75	0.621	1.09
PTK6 Down-Regulation (R-BTA-8849472)	3	2	1.14	+	1.75	0.621	1.09
Amino Acid conjugation (R-BTA-156587)	3	2	1.14	+	1.75	0.621	1.09
betaKlotho-mediated ligand binding (R-BTA-1307965)	3	2	1.14	+	1.75	0.621	1.09
E2F-enabled inhibition of pre-replication complex formation (R-BTA-113507)	3	2	1.14	+	1.75	0.621	1.09
Vitamins B6 activation to pyridoxal phosphate (R-BTA-964975)	3	2	1.14	+	1.75	0.621	1.09
TFAP2 (AP-2) family regulates transcription of cell cycle factors (R-BTA-8866911)	3	2	1.14	+	1.75	0.621	1.09
Signaling by NOTCH1 (R-BTA-1980143)	12	8	4.56	+	1.75	0.216	1.04
Conjugation of benzoate with glycine (R-BTA-177135)	3	2	1.14	+	1.75	0.621	1.08
Choline catabolism (R-BTA-6798163)	6	4	2.28	+	1.75	0.478	1.05
Selenoamino acid metabolism (R-BTA-2408522)	3	2	1.14	+	1.75	0.621	1.08
Lysosomal glycogen catabolism (R-BTA-5357572)	3	2	1.14	+	1.75	0.621	1.08
Post-transcriptional silencing by small RNAs (R-BTA-426496)	6	4	2.28	+	1.75	0.478	1.05
Inhibition of TSC complex formation by PKB (R-BTA-165181)	3	2	1.14	+	1.75	0.621	1.08
Organic cation/anion/zwitterion transport (R-BTA-549132)	12	8	4.56	+	1.75	0.216	1.03
Conjugation of carboxylic acids (R-BTA-159424)	3	2	1.14	+	1.75	0.621	1.08
STAT6-mediated induction of chemokines (R-BTA-3249367)	3	2	1.14	+	1.75	0.621	1.08
Gamma-carboxylation of protein precursors (R-BTA-159740)	6	4	2.28	+	1.75	0.478	1.05
Beta oxidation of palmitoyl-CoA to myristoyl-CoA (R-BTA-77305)	3	2	1.14	+	1.75	0.621	1.08
Protein-protein interactions at synapses (R-BTA-6794362)	24	16	9.13	+	1.75	0.109	0.811
Interactions of neurexins and neuroligins at synapses (R-BTA-6794361)	24	16	9.13	+	1.75	0.109	0.807
Elevation of cytosolic Ca2+ levels (R-BTA-139853)	12	8	4.56	+	1.75	0.216	1.03
Ficolins bind to repetitive carbohydrate structures on the target cell surface (R-BTA-2855086)	3	2	1.14	+	1.75	0.621	1.07
Apoptotic cleavage of cell adhesion proteins (R-BTA-351906)	6	4	2.28	+	1.75	0.478	1.05
The NLRP1 inflammasome (R-BTA-844455)	3	2	1.14	+	1.75	0.621	1.07
SUMO is conjugated to E1 (UBA2:SAE1) (R-BTA-3065676)	3	2	1.14	+	1.75	0.621	1.07
IRF3-mediated induction of type I IFN (R-BTA-3270619)	3	2	1.14	+	1.75	0.621	1.07
TNFR1-mediated ceramide production (R-BTA-5626978)	6	4	2.28	+	1.75	0.478	1.05
Ligand-receptor interactions (R-BTA-5632681)	6	4	2.28	+	1.75	0.478	1.05
Beta oxidation of myristoyl-CoA to lauroyl-CoA (R-BTA-77285)	3	2	1.14	+	1.75	0.621	1.07
Post NMDA receptor activation events (R-BTA-438064)	29	19	11.03	+	1.72	0.0744	0.692
Gluconeogenesis (R-BTA-70263)	26	17	9.89	+	1.72	0.0877	0.759
CREB phosphorylation through the activation of Ras (R-BTA-442742)	23	15	8.75	+	1.71	0.104	0.802
Resolution of D-loop Structures through Synthesis-Dependent Strand Annealing (SDSA) (R-BTA-5693554)	23	15	8.75	+	1.71	0.104	0.798
Assembly of collagen fibrils and other multimeric structures (R-BTA-2022090)	43	28	16.36	+	1.71	0.0325	0.546
Mitochondrial Fatty Acid Beta-Oxidation (R-BTA-77289)	17	11	6.47	+	1.7	0.202	1.03
Glucose metabolism (R-BTA-70326)	65	42	24.73	+	1.7	0.00898	0.328
NRAGE signals death through JNK (R-BTA-193648)	45	29	17.12	+	1.69	0.0361	0.544
Mismatch Repair (R-BTA-5358508)	14	9	5.33	+	1.69	0.243	1.06
Collagen formation (R-BTA-1474290)	75	48	28.53	+	1.68	0.00608	0.307
Regulation of TNFR1 signaling (R-BTA-5357905)	25	16	9.51	+	1.68	0.115	0.811
Activation of NMDA receptor upon glutamate binding and postsynaptic events (R-BTA-442755)	33	21	12.55	+	1.67	0.0678	0.67
Surfactant metabolism (R-BTA-5683826)	22	14	8.37	+	1.67	0.137	0.896
TNFR1-induced NFkappaB signaling pathway (R-BTA-5357956)	22	14	8.37	+	1.67	0.137	0.892
Regulation of signaling by CBL (R-BTA-912631)	11	7	4.18	+	1.67	0.295	1.07
Synthesis of IP2, IP, and Ins in the cytosol (R-BTA-1855183)	11	7	4.18	+	1.67	0.295	1.07
Regulation of TP53 Activity through Association with Co-factors (R-BTA-6804759)	11	7	4.18	+	1.67	0.295	1.06
G alpha (z) signalling events (R-BTA-418597)	11	7	4.18	+	1.67	0.295	1.06
CDC6 association with the ORC:origin complex (R-BTA-68689)	11	7	4.18	+	1.67	0.295	1.06
Establishment of Sister Chromatid Cohesion (R-BTA-2468052)	11	7	4.18	+	1.67	0.295	1.06
Biotin transport and metabolism (R-BTA-196780)	11	7	4.18	+	1.67	0.295	1.05
Apoptotic execution phase (R-BTA-75153)	41	26	15.6	+	1.67	0.054	0.598
CTLA4 inhibitory signaling (R-BTA-389513)	19	12	7.23	+	1.66	0.164	0.97
Non-integrin membrane-ECM interactions (R-BTA-3000171)	27	17	10.27	+	1.66	0.127	0.858
Integrin cell surface interactions (R-BTA-216083)	67	42	25.49	+	1.65	0.0132	0.357
p38MAPK events (R-BTA-171007)	8	5	3.04	+	1.64	0.364	1.06
Interaction between L1 and Ankyrins (R-BTA-445095)	16	10	6.09	+	1.64	0.27	1.06
Depolymerisation of the Nuclear Lamina (R-BTA-4419969)	8	5	3.04	+	1.64	0.364	1.06
Condensation of Prometaphase Chromosomes (R-BTA-2514853)	8	5	3.04	+	1.64	0.364	1.06
Regulation of Insulin-like Growth Factor (IGF) transport and uptake by Insulin-like Growth Factor Binding Proteins (IGFBPs) (R-BTA-381426)	16	10	6.09	+	1.64	0.27	1.05
NOTCH1 Intracellular Domain Regulates Transcription (R-BTA-2122947)	8	5	3.04	+	1.64	0.364	1.06
Terminal pathway of complement (R-BTA-166665)	8	5	3.04	+	1.64	0.364	1.05
Gamma-carboxylation, transport, and amino-terminal cleavage of proteins (R-BTA-159854)	8	5	3.04	+	1.64	0.364	1.05
Nuclear Envelope Reassembly (R-BTA-2995410)	8	5	3.04	+	1.64	0.364	1.05
ERK/MAPK targets (R-BTA-198753)	16	10	6.09	+	1.64	0.27	1.05
Initiation of Nuclear Envelope Reformation (R-BTA-2995383)	8	5	3.04	+	1.64	0.364	1.05
Removal of aminoterminal propeptides from gamma-carboxylated proteins (R-BTA-159782)	8	5	3.04	+	1.64	0.364	1.05
TNFR1-induced proapoptotic signaling (R-BTA-5357786)	8	5	3.04	+	1.64	0.364	1.04
Processing of Intronless Pre-mRNAs (R-BTA-77595)	16	10	6.09	+	1.64	0.27	1.05
PI Metabolism (R-BTA-1483255)	52	32	19.78	+	1.62	0.037	0.547
Mismatch repair (MMR) directed by MSH2:MSH6 (MutSalpha) (R-BTA-5358565)	13	8	4.95	+	1.62	0.327	1.04
Activation of the pre-replicative complex (R-BTA-68962)	31	19	11.79	+	1.61	0.112	0.818
ABC transporters in lipid homeostasis (R-BTA-1369062)	18	11	6.85	+	1.61	0.216	1.05
Citric acid cycle (TCA cycle) (R-BTA-71403)	18	11	6.85	+	1.61	0.216	1.04
G alpha (12/13) signalling events (R-BTA-416482)	59	36	22.44	+	1.6	0.0285	0.521
Voltage gated Potassium channels (R-BTA-1296072)	41	25	15.6	+	1.6	0.0721	0.676
Platelet calcium homeostasis (R-BTA-418360)	23	14	8.75	+	1.6	0.196	1.03
Centrosome maturation (R-BTA-380287)	73	44	27.77	+	1.58	0.0171	0.402
Recruitment of mitotic centrosome proteins and complexes (R-BTA-380270)	73	44	27.77	+	1.58	0.0171	0.396
Synthesis of PIPs at the early endosome membrane (R-BTA-1660516)	15	9	5.71	+	1.58	0.262	1.09
Post-chaperonin tubulin folding pathway (R-BTA-389977)	5	3	1.9	+	1.58	0.693	1.09
SUMOylation of DNA damage response and repair proteins (R-BTA-3108214)	70	42	26.63	+	1.58	0.0255	0.51
CREB phosphorylation through the activation of Adenylate Cyclase (R-BTA-442720)	5	3	1.9	+	1.58	0.693	1.09
N-glycan trimming and elongation in the cis-Golgi (R-BTA-964739)	5	3	1.9	+	1.58	0.693	1.09
Hyaluronan metabolism (R-BTA-2142845)	15	9	5.71	+	1.58	0.262	1.09
Association of TriC/CCT with target proteins during biosynthesis (R-BTA-390471)	10	6	3.8	+	1.58	0.403	1.06
VxPx cargo-targeting to cilium (R-BTA-5620916)	20	12	7.61	+	1.58	0.234	1.04
Interaction With The Zona Pellucida (R-BTA-1300644)	10	6	3.8	+	1.58	0.403	1.06
Activation of RAS in B cells (R-BTA-1169092)	5	3	1.9	+	1.58	0.693	1.09
Acyl chain remodeling of CL (R-BTA-1482798)	5	3	1.9	+	1.58	0.693	1.09
Activated NOTCH1 Transmits Signal to the Nucleus (R-BTA-2122948)	5	3	1.9	+	1.58	0.693	1.09
Activation of Kainate Receptors upon glutamate binding (R-BTA-451326)	15	9	5.71	+	1.58	0.262	1.08
FGFR1b ligand binding and activation (R-BTA-190370)	5	3	1.9	+	1.58	0.693	1.09
Highly calcium permeable postsynaptic nicotinic acetylcholine receptors (R-BTA-629594)	10	6	3.8	+	1.58	0.403	1.05
Notch-HLH transcription pathway (R-BTA-350054)	10	6	3.8	+	1.58	0.403	1.05
Scavenging by Class A Receptors (R-BTA-3000480)	10	6	3.8	+	1.58	0.403	1.05
IRAK1 recruits IKK complex (R-BTA-937039)	10	6	3.8	+	1.58	0.403	1.05
Vitamin B5 (pantothenate) metabolism (R-BTA-199220)	10	6	3.8	+	1.58	0.403	1.05
NOSTRIN mediated eNOS trafficking (R-BTA-203641)	5	3	1.9	+	1.58	0.693	1.09
TNF signaling (R-BTA-75893)	35	21	13.31	+	1.58	0.101	0.817
Eukaryotic Translation Elongation (R-BTA-156842)	5	3	1.9	+	1.58	0.693	1.09
NF-kB is activated and signals survival (R-BTA-209560)	10	6	3.8	+	1.58	0.403	1.04
IRS activation (R-BTA-74713)	5	3	1.9	+	1.58	0.693	1.08
Interleukin-6 signaling (R-BTA-1059683)	10	6	3.8	+	1.58	0.403	1.04
Regulation of TP53 Activity through Methylation (R-BTA-6804760)	15	9	5.71	+	1.58	0.262	1.08
Fructose catabolism (R-BTA-70350)	5	3	1.9	+	1.58	0.693	1.08
IRAK1 recruits IKK complex upon TLR7/8 or 9 stimulation (R-BTA-975144)	10	6	3.8	+	1.58	0.403	1.04
Processive synthesis on the C-strand of the telomere (R-BTA-174414)	10	6	3.8	+	1.58	0.403	1.04
Pregnenolone biosynthesis (R-BTA-196108)	5	3	1.9	+	1.58	0.693	1.08
Negative regulators of RIG-I/MDA5 signaling (R-BTA-936440)	15	9	5.71	+	1.58	0.262	1.08
G2 Phase (R-BTA-68911)	5	3	1.9	+	1.58	0.693	1.08
SHC-related events triggered by IGF1R (R-BTA-2428933)	5	3	1.9	+	1.58	0.693	1.08
Coenzyme A biosynthesis (R-BTA-196783)	5	3	1.9	+	1.58	0.693	1.08
NOD1/2 Signaling Pathway (R-BTA-168638)	25	15	9.51	+	1.58	0.16	0.974
Striated Muscle Contraction (R-BTA-390522)	32	19	12.17	+	1.56	0.157	0.965
Elastic fibre formation (R-BTA-1566948)	32	19	12.17	+	1.56	0.157	0.961
Synthesis of PC (R-BTA-1483191)	17	10	6.47	+	1.55	0.283	1.05
Regulation of PLK1 Activity at G2/M Transition (R-BTA-2565942)	80	47	30.43	+	1.54	0.0216	0.465
Resolution of D-loop Structures through Holliday Junction Intermediates (R-BTA-5693568)	29	17	11.03	+	1.54	0.185	1.02
Molecules associated with elastic fibres (R-BTA-2129379)	29	17	11.03	+	1.54	0.185	1.02
Resolution of D-Loop Structures (R-BTA-5693537)	29	17	11.03	+	1.54	0.185	1.02
Rho GTPase cycle (R-BTA-194840)	120	70	45.65	+	1.53	0.00546	0.296
WNT5A-dependent internalization of FZD4 (R-BTA-5099900)	12	7	4.56	+	1.53	0.44	1.1
Association of licensing factors with the pre-replicative complex (R-BTA-69298)	12	7	4.56	+	1.53	0.44	1.09
LGI-ADAM interactions (R-BTA-5682910)	12	7	4.56	+	1.53	0.44	1.09
Ovarian tumor domain proteases (R-BTA-5689896)	24	14	9.13	+	1.53	0.206	1.02
Metabolism of folate and pterines (R-BTA-196757)	12	7	4.56	+	1.53	0.44	1.09
Homology Directed Repair (R-BTA-5693538)	93	54	35.38	+	1.53	0.0158	0.386
Chondroitin sulfate biosynthesis (R-BTA-2022870)	19	11	7.23	+	1.52	0.306	1.03
Nonhomologous End-Joining (NHEJ) (R-BTA-5693571)	38	22	14.46	+	1.52	0.114	0.809
CD209 (DC-SIGN) signaling (R-BTA-5621575)	19	11	7.23	+	1.52	0.306	1.03
Extracellular matrix organization (R-BTA-1474244)	209	121	79.5	+	1.52	0.000312	0.0456
Mitotic Prometaphase (R-BTA-68877)	104	60	39.56	+	1.52	0.011	0.328
AURKA Activation by TPX2 (R-BTA-8854518)	68	39	25.87	+	1.51	0.0503	0.593
Resolution of Sister Chromatid Cohesion (R-BTA-2500257)	96	55	36.52	+	1.51	0.0174	0.397
Endogenous sterols (R-BTA-211976)	21	12	7.99	+	1.5	0.248	1.07
Lysosomal oligosaccharide catabolism (R-BTA-8853383)	7	4	2.66	+	1.5	0.509	1.08
Activation of the mRNA upon binding of the cap-binding complex and eIFs, and subsequent binding to 43S (R-BTA-72662)	7	4	2.66	+	1.5	0.509	1.08
FGFR2b ligand binding and activation (R-BTA-190377)	7	4	2.66	+	1.5	0.509	1.08
Highly sodium permeable acetylcholine nicotinic receptors (R-BTA-629587)	7	4	2.66	+	1.5	0.509	1.08
MicroRNA (miRNA) biogenesis (R-BTA-203927)	7	4	2.66	+	1.5	0.509	1.08
PKA activation (R-BTA-163615)	14	8	5.33	+	1.5	0.347	1.05
Negative regulation of activity of TFAP2 (AP-2) family transcription factors (R-BTA-8866904)	7	4	2.66	+	1.5	0.509	1.07
PKA-mediated phosphorylation of CREB (R-BTA-111931)	14	8	5.33	+	1.5	0.347	1.05
Transport of gamma-carboxylated protein precursors from the endoplasmic reticulum to the Golgi apparatus (R-BTA-159763)	7	4	2.66	+	1.5	0.509	1.07
PKA activation in glucagon signalling (R-BTA-164378)	14	8	5.33	+	1.5	0.347	1.05
Nitric oxide stimulates guanylate cyclase (R-BTA-392154)	14	8	5.33	+	1.5	0.347	1.05
WNT mediated activation of DVL (R-BTA-201688)	7	4	2.66	+	1.5	0.509	1.07
Loss of proteins required for interphase microtubule organization from the centrosome (R-BTA-380284)	65	37	24.73	+	1.5	0.0585	0.606
Loss of Nlp from mitotic centrosomes (R-BTA-380259)	65	37	24.73	+	1.5	0.0585	0.602
Nucleotide-binding domain, leucine rich repeat containing receptor (NLR) signaling pathways (R-BTA-168643)	37	21	14.08	+	1.49	0.143	0.909
SUMO E3 ligases SUMOylate target proteins (R-BTA-3108232)	90	51	34.24	+	1.49	0.0293	0.504
Cell death signalling via NRAGE, NRIF and NADE (R-BTA-204998)	60	34	22.82	+	1.49	0.0648	0.653
Signaling by Rho GTPases (R-BTA-194315)	320	181	121.73	+	1.49	2.69e-05	0.00787
Calnexin/calreticulin cycle (R-BTA-901042)	23	13	8.75	+	1.49	0.264	1.06
N-glycan trimming in the ER and Calnexin/Calreticulin cycle (R-BTA-532668)	32	18	12.17	+	1.48	0.204	1.02
Regulation of TP53 Activity (R-BTA-5633007)	141	79	53.64	+	1.47	0.00636	0.31
p75 NTR receptor-mediated signalling (R-BTA-193704)	77	43	29.29	+	1.47	0.0512	0.598
SUMOylation (R-BTA-2990846)	95	53	36.14	+	1.47	0.0269	0.51
G2/M DNA damage checkpoint (R-BTA-69473)	61	34	23.2	+	1.47	0.0839	0.743
HDR through Homologous Recombination (HR) or Single Strand Annealing (SSA) (R-BTA-5693567)	88	49	33.48	+	1.46	0.0349	0.543
activated TAK1 mediates p38 MAPK activation (R-BTA-450302)	18	10	6.85	+	1.46	0.396	1.08
Purine catabolism (R-BTA-74259)	9	5	3.42	+	1.46	0.55	1.11
ERBB2 Activates PTK6 Signaling (R-BTA-8847993)	9	5	3.42	+	1.46	0.55	1.11
Cargo trafficking to the periciliary membrane (R-BTA-5620920)	36	20	13.69	+	1.46	0.179	1.03
HDR through Single Strand Annealing (SSA) (R-BTA-5685938)	36	20	13.69	+	1.46	0.179	1.02
Axonal growth inhibition (RHOA activation) (R-BTA-193634)	9	5	3.42	+	1.46	0.55	1.11
Highly calcium permeable nicotinic acetylcholine receptors (R-BTA-629597)	9	5	3.42	+	1.46	0.55	1.1
Adherens junctions interactions (R-BTA-418990)	36	20	13.69	+	1.46	0.179	1.02
IRE1alpha activates chaperones (R-BTA-381070)	9	5	3.42	+	1.46	0.55	1.1
RHO GTPases activate IQGAPs (R-BTA-5626467)	18	10	6.85	+	1.46	0.396	1.08
Signal attenuation (R-BTA-74749)	9	5	3.42	+	1.46	0.55	1.1
SHC1 events in ERBB2 signaling (R-BTA-1250196)	9	5	3.42	+	1.46	0.55	1.1
Mismatch repair (MMR) directed by MSH2:MSH3 (MutSbeta) (R-BTA-5358606)	9	5	3.42	+	1.46	0.55	1.1
Removal of the Flap Intermediate from the C-strand (R-BTA-174437)	9	5	3.42	+	1.46	0.55	1.1
Depolarization of the Presynaptic Terminal Triggers the Opening of Calcium Channels (R-BTA-112308)	9	5	3.42	+	1.46	0.55	1.09
Processing of DNA double-strand break ends (R-BTA-5693607)	63	35	23.97	+	1.46	0.0885	0.761
Ion channel transport (R-BTA-983712)	168	93	63.91	+	1.46	0.00426	0.259
Regulation of TP53 Expression and Degradation (R-BTA-6806003)	29	16	11.03	+	1.45	0.243	1.06
Regulation of TP53 Degradation (R-BTA-6804757)	29	16	11.03	+	1.45	0.243	1.06
Signaling by ERBB2 (R-BTA-1227986)	31	17	11.79	+	1.44	0.257	1.08
Disassembly of the destruction complex and recruitment of AXIN to the membrane (R-BTA-4641262)	31	17	11.79	+	1.44	0.257	1.08
Cell junction organization (R-BTA-446728)	64	35	24.35	+	1.44	0.0908	0.771
Attenuation phase (R-BTA-3371568)	11	6	4.18	+	1.43	0.587	1.09
Activation of BAD and translocation to mitochondria (R-BTA-111447)	11	6	4.18	+	1.43	0.587	1.08
Import of palmitoyl-CoA into the mitochondrial matrix (R-BTA-200425)	11	6	4.18	+	1.43	0.587	1.08
MAP3K8 (TPL2)-dependent MAPK1/3 activation (R-BTA-5684264)	11	6	4.18	+	1.43	0.587	1.08
Inositol phosphate metabolism (R-BTA-1483249)	44	24	16.74	+	1.43	0.174	1.01
SUMOylation of RNA binding proteins (R-BTA-4570464)	44	24	16.74	+	1.43	0.174	1
Reduction of cytosolic Ca++ levels (R-BTA-418359)	11	6	4.18	+	1.43	0.587	1.08
DCC mediated attractive signaling (R-BTA-418885)	11	6	4.18	+	1.43	0.587	1.08
cGMP effects (R-BTA-418457)	11	6	4.18	+	1.43	0.587	1.08
Regulation of IFNG signaling (R-BTA-877312)	11	6	4.18	+	1.43	0.587	1.08
Cargo recognition for clathrin-mediated endocytosis (R-BTA-8856825)	68	37	25.87	+	1.43	0.0806	0.727
G2/M Checkpoints (R-BTA-69481)	129	70	49.07	+	1.43	0.0207	0.458
SHC-mediated cascade:FGFR2 (R-BTA-5654699)	24	13	9.13	+	1.42	0.356	1.07
Platelet homeostasis (R-BTA-418346)	48	26	18.26	+	1.42	0.152	0.951
Antigen activates B Cell Receptor (BCR) leading to generation of second messengers (R-BTA-983695)	24	13	9.13	+	1.42	0.356	1.06
COPI-dependent Golgi-to-ER retrograde traffic (R-BTA-6811434)	48	26	18.26	+	1.42	0.152	0.947
Activation of ATR in response to replication stress (R-BTA-176187)	37	20	14.08	+	1.42	0.234	1.05
Nucleotide Excision Repair (R-BTA-5696398)	102	55	38.8	+	1.42	0.0393	0.564
Acetylcholine Binding And Downstream Events (R-BTA-181431)	13	7	4.95	+	1.42	0.457	1.1
Activation of Nicotinic Acetylcholine Receptors (R-BTA-629602)	13	7	4.95	+	1.42	0.457	1.1
PTK6 Regulates RHO GTPases, RAS GTPase and MAP kinases (R-BTA-8849471)	26	14	9.89	+	1.42	0.291	1.06
Inhibition of adenylate cyclase pathway (R-BTA-997269)	13	7	4.95	+	1.42	0.457	1.09
Muscle contraction (R-BTA-397014)	143	77	54.4	+	1.42	0.0153	0.391
Adenylate cyclase inhibitory pathway (R-BTA-170670)	13	7	4.95	+	1.42	0.457	1.09
Regulation of FZD by ubiquitination (R-BTA-4641263)	13	7	4.95	+	1.42	0.457	1.09
Postsynaptic nicotinic acetylcholine receptors (R-BTA-622327)	13	7	4.95	+	1.42	0.457	1.09
ABC-family proteins mediated transport (R-BTA-382556)	106	57	40.32	+	1.41	0.0427	0.578
RHO GTPases Activate Formins (R-BTA-5663220)	106	57	40.32	+	1.41	0.0427	0.573
PI5P, PP2A and IER3 Regulate PI3K/AKT Signaling (R-BTA-6811558)	67	36	25.49	+	1.41	0.0978	0.808
RNA polymerase II transcribes snRNA genes (R-BTA-6807505)	69	37	26.25	+	1.41	0.102	0.818
Platelet Aggregation (Plug Formation) (R-BTA-76009)	28	15	10.65	+	1.41	0.306	1.06
RHO GTPase Effectors (R-BTA-195258)	208	111	79.12	+	1.4	0.00452	0.264
Global Genome Nucleotide Excision Repair (GG-NER) (R-BTA-5696399)	75	40	28.53	+	1.4	0.0938	0.779
Regulation of pyruvate dehydrogenase (PDH) complex (R-BTA-204174)	15	8	5.71	+	1.4	0.484	1.06
VLDL interactions (R-BTA-8855121)	15	8	5.71	+	1.4	0.484	1.05
Cargo concentration in the ER (R-BTA-5694530)	30	16	11.41	+	1.4	0.321	1.04
Insulin processing (R-BTA-264876)	15	8	5.71	+	1.4	0.484	1.05
Purine metabolism (R-BTA-73847)	32	17	12.17	+	1.4	0.265	1.05
JNK (c-Jun kinases) phosphorylation and activation mediated by activated human TAK1 (R-BTA-450321)	17	9	6.47	+	1.39	0.39	1.07
Resolution of AP sites via the multiple-nucleotide patch replacement pathway (R-BTA-110373)	17	9	6.47	+	1.39	0.39	1.07
Fatty acid, triacylglycerol, and ketone body metabolism (R-BTA-535734)	125	66	47.55	+	1.39	0.0344	0.547
Negative regulation of the PI3K/AKT network (R-BTA-199418)	72	38	27.39	+	1.39	0.109	0.815
Signaling by PDGF (R-BTA-186797)	292	154	111.08	+	1.39	0.00111	0.109
Intrinsic Pathway of Fibrin Clot Formation (R-BTA-140837)	19	10	7.23	+	1.38	0.409	1.04
Synthesis of very long-chain fatty acyl-CoAs (R-BTA-75876)	19	10	7.23	+	1.38	0.409	1.04
Nuclear Events (kinase and transcription factor activation) (R-BTA-198725)	19	10	7.23	+	1.38	0.409	1.04
Branched-chain amino acid catabolism (R-BTA-70895)	19	10	7.23	+	1.38	0.409	1.04
Regulation of lipid metabolism by Peroxisome proliferator-activated receptor alpha (PPARalpha) (R-BTA-400206)	19	10	7.23	+	1.38	0.409	1.04
Presynaptic phase of homologous DNA pairing and strand exchange (R-BTA-5693616)	38	20	14.46	+	1.38	0.241	1.06
Homologous DNA Pairing and Strand Exchange (R-BTA-5693579)	40	21	15.22	+	1.38	0.251	1.07
DNA Double-Strand Break Repair (R-BTA-5693532)	120	63	45.65	+	1.38	0.046	0.56
Nuclear Envelope Breakdown (R-BTA-2980766)	40	21	15.22	+	1.38	0.251	1.06
HSF1-dependent transactivation (R-BTA-3371571)	21	11	7.99	+	1.38	0.428	1.08
Degradation of the extracellular matrix (R-BTA-1474228)	84	44	31.95	+	1.38	0.0917	0.771
Cell-cell junction organization (R-BTA-421270)	42	22	15.98	+	1.38	0.262	1.09
Death Receptor Signalling (R-BTA-73887)	42	22	15.98	+	1.38	0.262	1.09
DNA Repair (R-BTA-73894)	258	135	98.14	+	1.38	0.00308	0.214
Neuronal System (R-BTA-112316)	266	139	101.19	+	1.37	0.00295	0.215
Signaling by Hedgehog (R-BTA-5358351)	136	71	51.74	+	1.37	0.0348	0.547
Integrin alphaIIb beta3 signaling (R-BTA-354192)	23	12	8.75	+	1.37	0.351	1.06
Ribosomal scanning and start codon recognition (R-BTA-72702)	48	25	18.26	+	1.37	0.237	1.05
Antiviral mechanism by IFN-stimulated genes (R-BTA-1169410)	25	13	9.51	+	1.37	0.366	1.05
ISG15 antiviral mechanism (R-BTA-1169408)	25	13	9.51	+	1.37	0.366	1.04
N-glycan antennae elongation in the medial/trans-Golgi (R-BTA-975576)	25	13	9.51	+	1.37	0.366	1.04
FCERI mediated Ca+2 mobilization (R-BTA-2871809)	25	13	9.51	+	1.37	0.366	1.04
Processing of Capped Intronless Pre-mRNA (R-BTA-75067)	25	13	9.51	+	1.37	0.366	1.04
G2/M Transition (R-BTA-69275)	156	81	59.34	+	1.36	0.0237	0.488
Mitotic G2-G2/M phases (R-BTA-453274)	158	82	60.1	+	1.36	0.0244	0.495
HDR through Homologous Recombination (HRR) (R-BTA-5685942)	54	28	20.54	+	1.36	0.215	1.05
Glutamate Binding, Activation of AMPA Receptors and Synaptic Plasticity (R-BTA-399721)	27	14	10.27	+	1.36	0.382	1.07
Trafficking of AMPA receptors (R-BTA-399719)	27	14	10.27	+	1.36	0.382	1.07
Signalling by NGF (R-BTA-166520)	361	187	137.33	+	1.36	0.000716	0.0805
Phospholipid metabolism (R-BTA-1483257)	143	74	54.4	+	1.36	0.0328	0.538
Antigen Presentation: Folding, assembly and peptide loading of class I MHC (R-BTA-983170)	29	15	11.03	+	1.36	0.316	1.04
Regulation of Glucokinase by Glucokinase Regulatory Protein (R-BTA-170822)	29	15	11.03	+	1.36	0.316	1.04
Resolution of Abasic Sites (AP sites) (R-BTA-73933)	29	15	11.03	+	1.36	0.316	1.04
CD28 co-stimulation (R-BTA-389356)	29	15	11.03	+	1.36	0.316	1.03
PI3K events in ERBB4 signaling (R-BTA-1250342)	91	47	34.62	+	1.36	0.104	0.826
PI-3K cascade:FGFR2 (R-BTA-5654695)	91	47	34.62	+	1.36	0.104	0.821
PI-3K cascade:FGFR1 (R-BTA-5654689)	91	47	34.62	+	1.36	0.104	0.817
PIP3 activates AKT signaling (R-BTA-1257604)	91	47	34.62	+	1.36	0.104	0.812
PI-3K cascade:FGFR4 (R-BTA-5654720)	91	47	34.62	+	1.36	0.104	0.808
PI-3K cascade:FGFR3 (R-BTA-5654710)	91	47	34.62	+	1.36	0.104	0.804
Nuclear Pore Complex (NPC) Disassembly (R-BTA-3301854)	31	16	11.79	+	1.36	0.328	1.05
GAB1 signalosome (R-BTA-180292)	95	49	36.14	+	1.36	0.092	0.769
Signaling by FGFR1 (R-BTA-5654736)	266	137	101.19	+	1.35	0.00418	0.266
Hedgehog 'on' state (R-BTA-5632684)	101	52	38.42	+	1.35	0.0844	0.743
Fatty Acyl-CoA Biosynthesis (R-BTA-75105)	39	20	14.84	+	1.35	0.307	1.02
Apoptosis (R-BTA-109581)	78	40	29.67	+	1.35	0.123	0.834
Recruitment and ATM-mediated phosphorylation of repair and signaling proteins at DNA double strand breaks (R-BTA-5693565)	41	21	15.6	+	1.35	0.258	1.08
Programmed Cell Death (R-BTA-5357801)	82	42	31.19	+	1.35	0.13	0.87
Interleukin-3, 5 and GM-CSF signaling (R-BTA-512988)	207	106	78.74	+	1.35	0.0132	0.363
Pyruvate metabolism and Citric Acid (TCA) cycle (R-BTA-71406)	43	22	16.36	+	1.34	0.267	1.06
EPHB-mediated forward signaling (R-BTA-3928662)	43	22	16.36	+	1.34	0.267	1.05
Cell Cycle (R-BTA-1640170)	479	245	182.21	+	1.34	0.000175	0.0285
PI3K/AKT activation (R-BTA-198203)	94	48	35.76	+	1.34	0.109	0.805
Role of LAT2/NTAL/LAB on calcium mobilization (R-BTA-2730905)	100	51	38.04	+	1.34	0.0998	0.819
Interleukin-2 signaling (R-BTA-451927)	202	103	76.84	+	1.34	0.017	0.408
MAP kinase activation in TLR cascade (R-BTA-450294)	51	26	19.4	+	1.34	0.25	1.07
NCAM signaling for neurite out-growth (R-BTA-375165)	206	105	78.36	+	1.34	0.0153	0.386
Downstream signaling of activated FGFR1 (R-BTA-5654687)	261	133	99.29	+	1.34	0.00641	0.302
Signaling by FGFR3 (R-BTA-5654741)	261	133	99.29	+	1.34	0.00641	0.293
Cell Cycle Checkpoints (R-BTA-69620)	159	81	60.48	+	1.34	0.0352	0.542
Deubiquitination (R-BTA-5688426)	228	116	86.73	+	1.34	0.0127	0.357
Signaling by FGFR4 (R-BTA-5654743)	260	132	98.91	+	1.33	0.00744	0.311
Interleukin receptor SHC signaling (R-BTA-912526)	197	100	74.94	+	1.33	0.0221	0.463
Orc1 removal from chromatin (R-BTA-68949)	67	34	25.49	+	1.33	0.181	1.02
Switching of origins to a post-replicative state (R-BTA-69052)	67	34	25.49	+	1.33	0.181	1.01
Removal of licensing factors from origins (R-BTA-69300)	69	35	26.25	+	1.33	0.186	1.02
Mitotic Anaphase (R-BTA-68882)	164	83	62.39	+	1.33	0.0379	0.554
Metabolism of carbohydrates (R-BTA-71387)	247	125	93.96	+	1.33	0.0101	0.315
Signaling by the B Cell Receptor (BCR) (R-BTA-983705)	178	90	67.71	+	1.33	0.0281	0.52
Cell-Cell communication (R-BTA-1500931)	95	48	36.14	+	1.33	0.111	0.816
Clathrin-mediated endocytosis (R-BTA-8856828)	105	53	39.94	+	1.33	0.108	0.815
Downstream signaling of activated FGFR2 (R-BTA-5654696)	258	130	98.14	+	1.32	0.00998	0.339
Downstream signaling of activated FGFR4 (R-BTA-5654716)	258	130	98.14	+	1.32	0.00998	0.331
Downstream signaling of activated FGFR3 (R-BTA-5654708)	258	130	98.14	+	1.32	0.00998	0.324
Signaling by SCF-KIT (R-BTA-1433557)	258	130	98.14	+	1.32	0.00998	0.317
Downstream signal transduction (R-BTA-186763)	270	136	102.71	+	1.32	0.00849	0.327
Signaling by EGFR (R-BTA-177929)	274	138	104.23	+	1.32	0.00765	0.311
Downstream signaling events of B Cell Receptor (BCR) (R-BTA-1168372)	157	79	59.72	+	1.32	0.048	0.575
Transmission across Chemical Synapses (R-BTA-112315)	163	82	62.01	+	1.32	0.0441	0.576
Mitotic Metaphase and Anaphase (R-BTA-2555396)	165	83	62.77	+	1.32	0.0386	0.558
Fc epsilon receptor (FCERI) signaling (R-BTA-2454202)	291	146	110.7	+	1.32	0.00694	0.308
GPVI-mediated activation cascade (R-BTA-114604)	46	23	17.5	+	1.31	0.282	1.05
Ion homeostasis (R-BTA-5578775)	46	23	17.5	+	1.31	0.282	1.04
Interferon gamma signaling (R-BTA-877300)	16	8	6.09	+	1.31	0.5	1.08
Regulation of DNA replication (R-BTA-69304)	72	36	27.39	+	1.31	0.195	1.03
LDL-mediated lipid transport (R-BTA-171052)	8	4	3.04	+	1.31	0.747	1.1
Adenosine P1 receptors (R-BTA-417973)	4	2	1.52	+	1.31	0.67	1.11
MASTL Facilitates Mitotic Progression (R-BTA-2465910)	2	1	0.76	+	1.31	1	1.07
ERKs are inactivated (R-BTA-202670)	10	5	3.8	+	1.31	0.574	1.1
Mitotic Metaphase/Anaphase Transition (R-BTA-68881)	2	1	0.76	+	1.31	1	1.07
NOSIP mediated eNOS trafficking (R-BTA-203754)	2	1	0.76	+	1.31	1	1.07
Assembly of the pre-replicative complex (R-BTA-68867)	64	32	24.35	+	1.31	0.209	1.04
HSF1 activation (R-BTA-3371511)	8	4	3.04	+	1.31	0.747	1.1
TRKA activation by NGF (R-BTA-187042)	2	1	0.76	+	1.31	1	1.07
Collagen degradation (R-BTA-1442490)	42	21	15.98	+	1.31	0.323	1.05
Hexose transport (R-BTA-189200)	42	21	15.98	+	1.31	0.323	1.05
Telomere Extension By Telomerase (R-BTA-171319)	2	1	0.76	+	1.31	1	1.07
WNT5A-dependent internalization of FZD2, FZD5 and ROR2 (R-BTA-5140745)	4	2	1.52	+	1.31	0.67	1.11
Activation of TRKA receptors (R-BTA-187015)	2	1	0.76	+	1.31	1	1.07
Insulin effects increased synthesis of Xylulose-5-Phosphate (R-BTA-163754)	2	1	0.76	+	1.31	1	1.07
Formation of the ternary complex, and subsequently, the 43S complex (R-BTA-72695)	42	21	15.98	+	1.31	0.323	1.05
Glucose transport (R-BTA-70153)	40	20	15.22	+	1.31	0.314	1.03
Methionine salvage pathway (R-BTA-1237112)	4	2	1.52	+	1.31	0.67	1.11
Activation of IRF3/IRF7 mediated by TBK1/IKK epsilon (R-BTA-936964)	2	1	0.76	+	1.31	1	1.06
Sperm:Oocyte Membrane Binding (R-BTA-1300652)	2	1	0.76	+	1.31	1	1.06
Free fatty acid receptors (R-BTA-444209)	4	2	1.52	+	1.31	0.67	1.11
p75NTR regulates axonogenesis (R-BTA-193697)	10	5	3.8	+	1.31	0.574	1.1
Acetylcholine regulates insulin secretion (R-BTA-399997)	8	4	3.04	+	1.31	0.747	1.09
Reactions specific to the complex N-glycan synthesis pathway (R-BTA-975578)	10	5	3.8	+	1.31	0.574	1.1
Phosphorylation of the APC/C (R-BTA-176412)	18	9	6.85	+	1.31	0.52	1.09
CRMPs in Sema3A signaling (R-BTA-399956)	16	8	6.09	+	1.31	0.5	1.08
ER-Phagosome pathway (R-BTA-1236974)	22	11	8.37	+	1.31	0.441	1.09
Metabolism of serotonin (R-BTA-380612)	2	1	0.76	+	1.31	1	1.06
TRAF6 mediated induction of TAK1 complex (R-BTA-937072)	2	1	0.76	+	1.31	1	1.06
PTK6 Activates STAT3 (R-BTA-8849474)	4	2	1.52	+	1.31	0.67	1.1
Fructose metabolism (R-BTA-5652084)	8	4	3.04	+	1.31	0.747	1.09
Lectin pathway of complement activation (R-BTA-166662)	4	2	1.52	+	1.31	0.67	1.1
Interaction With Cumulus Cells (R-BTA-2534343)	2	1	0.76	+	1.31	1	1.06
Sialic acid metabolism (R-BTA-4085001)	30	15	11.41	+	1.31	0.405	1.04
Plasmalogen biosynthesis (R-BTA-75896)	2	1	0.76	+	1.31	1	1.06
Transport of nucleotide sugars (R-BTA-727802)	8	4	3.04	+	1.31	0.747	1.09
XBP1(S) activates chaperone genes (R-BTA-381038)	8	4	3.04	+	1.31	0.747	1.09
Conjugation of phenylacetate with glutamine (R-BTA-177162)	2	1	0.76	+	1.31	1	1.06
Cysteine formation from homocysteine (R-BTA-1614603)	2	1	0.76	+	1.31	1	1.06
mRNA Editing: C to U Conversion (R-BTA-72200)	2	1	0.76	+	1.31	1	1.06
Tetrahydrobiopterin (BH4) synthesis, recycling, salvage and regulation (R-BTA-1474151)	8	4	3.04	+	1.31	0.747	1.09
Melanin biosynthesis (R-BTA-5662702)	2	1	0.76	+	1.31	1	1.06
Serine biosynthesis (R-BTA-977347)	2	1	0.76	+	1.31	1	1.06
Transcriptional regulation of white adipocyte differentiation (R-BTA-381340)	2	1	0.76	+	1.31	1	1.06
Conjugation of salicylate with glycine (R-BTA-177128)	2	1	0.76	+	1.31	1	1.06
Metabolism of ingested SeMet, Sec, MeSec into H2Se (R-BTA-2408508)	2	1	0.76	+	1.31	1	1.05
Histamine receptors (R-BTA-390650)	4	2	1.52	+	1.31	0.67	1.1
Calmodulin induced events (R-BTA-111933)	22	11	8.37	+	1.31	0.441	1.09
Ion transport by P-type ATPases (R-BTA-936837)	42	21	15.98	+	1.31	0.323	1.04
Reversal of alkylation damage by DNA dioxygenases (R-BTA-73943)	2	1	0.76	+	1.31	1	1.05
DNA Damage Reversal (R-BTA-73942)	2	1	0.76	+	1.31	1	1.05
Neurophilin interactions with VEGF and VEGFR (R-BTA-194306)	4	2	1.52	+	1.31	0.67	1.1
Nephrin interactions (R-BTA-373753)	10	5	3.8	+	1.31	0.574	1.1
Activation, translocation and oligomerization of BAX (R-BTA-114294)	2	1	0.76	+	1.31	1	1.05
Organic cation transport (R-BTA-549127)	8	4	3.04	+	1.31	0.747	1.09
VEGFR2 mediated cell proliferation (R-BTA-5218921)	198	99	75.32	+	1.31	0.0266	0.511
Signaling by Hippo (R-BTA-2028269)	20	10	7.61	+	1.31	0.539	1.1
Telomere C-strand synthesis initiation (R-BTA-174430)	8	4	3.04	+	1.31	0.747	1.09
Activation of gene expression by SREBF (SREBP) (R-BTA-2426168)	20	10	7.61	+	1.31	0.539	1.1
Hypusine synthesis from eIF5A-lysine (R-BTA-204626)	4	2	1.52	+	1.31	0.67	1.1
Glutathione synthesis and recycling (R-BTA-174403)	8	4	3.04	+	1.31	0.747	1.09
Wax biosynthesis (R-BTA-8848584)	4	2	1.52	+	1.31	0.67	1.1
Disinhibition of SNARE formation (R-BTA-114516)	4	2	1.52	+	1.31	0.67	1.1
Hydroxycarboxylic acid-binding receptors (R-BTA-3296197)	2	1	0.76	+	1.31	1	1.05
mRNA 3'-end processing (R-BTA-72187)	50	25	19.02	+	1.31	0.3	1.06
ZBP1(DAI) mediated induction of type I IFNs (R-BTA-1606322)	16	8	6.09	+	1.31	0.5	1.08
Neurotransmitter Receptor Binding And Downstream Transmission In The Postsynaptic Cell (R-BTA-112314)	118	59	44.89	+	1.31	0.0914	0.772
TWIK-related alkaline pH activated K+ channel (TALK) (R-BTA-1299361)	2	1	0.76	+	1.31	1	1.05
DNA replication initiation (R-BTA-68952)	8	4	3.04	+	1.31	0.747	1.09
ERBB2 Regulates Cell Motility (R-BTA-6785631)	10	5	3.8	+	1.31	0.574	1.1
SHC-mediated cascade:FGFR4 (R-BTA-5654719)	22	11	8.37	+	1.31	0.441	1.09
Base Excision Repair (R-BTA-73884)	30	15	11.41	+	1.31	0.405	1.04
Reuptake of GABA (R-BTA-888593)	4	2	1.52	+	1.31	0.67	1.1
Trafficking of myristoylated proteins to the cilium (R-BTA-5624138)	4	2	1.52	+	1.31	0.67	1.09
Interaction between PHLDA1 and AURKA (R-BTA-8854521)	2	1	0.76	+	1.31	1	1.05
HDL-mediated lipid transport (R-BTA-194223)	16	8	6.09	+	1.31	0.5	1.08
Retrograde transport at the Trans-Golgi-Network (R-BTA-6811440)	38	19	14.46	+	1.31	0.373	1.05
Fibronectin matrix formation (R-BTA-1566977)	4	2	1.52	+	1.31	0.67	1.09
Synthesis of dolichyl-phosphate-glucose (R-BTA-480985)	2	1	0.76	+	1.31	1	1.05
Spry regulation of FGF signaling (R-BTA-1295596)	10	5	3.8	+	1.31	0.574	1.1
Antagonism of Activin by Follistatin (R-BTA-2473224)	4	2	1.52	+	1.31	0.67	1.09
Formation of the Editosome (R-BTA-75094)	2	1	0.76	+	1.31	1	1.05
Physiological factors (R-BTA-5578768)	4	2	1.52	+	1.31	0.67	1.09
NOTCH2 intracellular domain regulates transcription (R-BTA-2197563)	4	2	1.52	+	1.31	0.67	1.09
DNA Double Strand Break Response (R-BTA-5693606)	42	21	15.98	+	1.31	0.323	1.04
Separation of Sister Chromatids (R-BTA-2467813)	158	79	60.1	+	1.31	0.0488	0.58
Activation of AMPA receptors (R-BTA-399710)	4	2	1.52	+	1.31	0.67	1.09
Asymmetric localization of PCP proteins (R-BTA-4608870)	52	26	19.78	+	1.31	0.255	1.08
Signaling by NOTCH (R-BTA-157118)	28	14	10.65	+	1.31	0.391	1.07
Synthesis of PIPs at the Golgi membrane (R-BTA-1660514)	14	7	5.33	+	1.31	0.625	1.07
Phase 1 - inactivation of fast Na+ channels (R-BTA-5576894)	24	12	9.13	+	1.31	0.456	1.11
Molybdenum cofactor biosynthesis (R-BTA-947581)	6	3	2.28	+	1.31	0.714	1.1
DAG and IP3 signaling (R-BTA-1489509)	24	12	9.13	+	1.31	0.456	1.11
EGFR interacts with phospholipase C-gamma (R-BTA-212718)	24	12	9.13	+	1.31	0.456	1.11
Xenobiotics (R-BTA-211981)	14	7	5.33	+	1.31	0.625	1.07
Creatine metabolism (R-BTA-71288)	6	3	2.28	+	1.31	0.714	1.1
Signaling by NODAL (R-BTA-1181150)	6	3	2.28	+	1.31	0.714	1.1
RNA Polymerase I Transcription Initiation (R-BTA-73762)	48	24	18.26	+	1.31	0.291	1.07
Unfolded Protein Response (UPR) (R-BTA-381119)	14	7	5.33	+	1.31	0.625	1.07
Presynaptic function of Kainate receptors (R-BTA-500657)	6	3	2.28	+	1.31	0.714	1.1
Sensing of DNA Double Strand Breaks (R-BTA-5693548)	6	3	2.28	+	1.31	0.714	1.09
Alpha-oxidation of phytanate (R-BTA-389599)	6	3	2.28	+	1.31	0.714	1.09
N-Glycan antennae elongation (R-BTA-975577)	14	7	5.33	+	1.31	0.625	1.07
TAK1 activates NFkB by phosphorylation and activation of IKKs complex (R-BTA-445989)	26	13	9.89	+	1.31	0.473	1.09
PI3K events in ERBB2 signaling (R-BTA-1963642)	12	6	4.56	+	1.31	0.6	1.1
Miscellaneous transport and binding events (R-BTA-5223345)	12	6	4.56	+	1.31	0.6	1.09
Fertilization (R-BTA-1187000)	24	12	9.13	+	1.31	0.456	1.1
Endosomal/Vacuolar pathway (R-BTA-1236977)	12	6	4.56	+	1.31	0.6	1.09
G1/S-Specific Transcription (R-BTA-69205)	14	7	5.33	+	1.31	0.625	1.07
Activation of C3 and C5 (R-BTA-174577)	6	3	2.28	+	1.31	0.714	1.09
Acetylcholine Neurotransmitter Release Cycle (R-BTA-264642)	6	3	2.28	+	1.31	0.714	1.09
PTK6 Regulates RTKs and Their Effectors AKT1 and DOK1 (R-BTA-8849469)	6	3	2.28	+	1.31	0.714	1.09
Abacavir transport and metabolism (R-BTA-2161522)	6	3	2.28	+	1.31	0.714	1.09
Common Pathway of Fibrin Clot Formation (R-BTA-140875)	14	7	5.33	+	1.31	0.625	1.07
mRNA decay by 5' to 3' exoribonuclease (R-BTA-430039)	14	7	5.33	+	1.31	0.625	1.07
GDP-fucose biosynthesis (R-BTA-6787639)	6	3	2.28	+	1.31	0.714	1.09
DEx/H-box helicases activate type I IFN and inflammatory cytokines production (R-BTA-3134963)	12	6	4.56	+	1.31	0.6	1.09
Nectin/Necl trans heterodimerization (R-BTA-420597)	6	3	2.28	+	1.31	0.714	1.09
Ca-dependent events (R-BTA-111996)	24	12	9.13	+	1.31	0.456	1.1
Reproduction (R-BTA-1474165)	24	12	9.13	+	1.31	0.456	1.1
RHO GTPases Activate Rhotekin and Rhophilins (R-BTA-5666185)	6	3	2.28	+	1.31	0.714	1.09
Glycogen synthesis (R-BTA-3322077)	12	6	4.56	+	1.31	0.6	1.09
Adrenoceptors (R-BTA-390696)	6	3	2.28	+	1.31	0.714	1.08
Metabolism of Angiotensinogen to Angiotensins (R-BTA-2022377)	14	7	5.33	+	1.31	0.625	1.06
Processive synthesis on the lagging strand (R-BTA-69183)	14	7	5.33	+	1.31	0.625	1.06
PLC-gamma1 signalling (R-BTA-167021)	24	12	9.13	+	1.31	0.456	1.1
Nicotinate metabolism (R-BTA-196807)	12	6	4.56	+	1.31	0.6	1.09
Regulation of beta-cell development (R-BTA-186712)	6	3	2.28	+	1.31	0.714	1.08
Recycling of bile acids and salts (R-BTA-159418)	12	6	4.56	+	1.31	0.6	1.09
Signaling by FGFR (R-BTA-190236)	294	147	111.84	+	1.31	0.00722	0.311
Nicotinamide salvaging (R-BTA-197264)	6	3	2.28	+	1.31	0.714	1.08
Trafficking of GluR2-containing AMPA receptors (R-BTA-416993)	14	7	5.33	+	1.31	0.625	1.06
Gap junction degradation (R-BTA-190873)	14	7	5.33	+	1.31	0.625	1.06
PTK6 promotes HIF1A stabilization (R-BTA-8857538)	6	3	2.28	+	1.31	0.714	1.08
HDMs demethylate histones (R-BTA-3214842)	26	13	9.89	+	1.31	0.473	1.09
Synthesis and interconversion of nucleotide di- and triphosphates (R-BTA-499943)	28	14	10.65	+	1.31	0.391	1.07
Pyrimidine biosynthesis (R-BTA-500753)	6	3	2.28	+	1.31	0.714	1.08
Presynaptic nicotinic acetylcholine receptors (R-BTA-622323)	12	6	4.56	+	1.31	0.6	1.09
Inflammasomes (R-BTA-622312)	12	6	4.56	+	1.31	0.6	1.08
Deadenylation of mRNA (R-BTA-429947)	24	12	9.13	+	1.31	0.456	1.1
Developmental Biology (R-BTA-1266738)	425	212	161.67	+	1.31	0.00144	0.124
VEGFA-VEGFR2 Pathway (R-BTA-4420097)	267	133	101.57	+	1.31	0.0113	0.329
Ub-specific processing proteases (R-BTA-5689880)	157	78	59.72	+	1.31	0.0566	0.6
NGF signalling via TRKA from the plasma membrane (R-BTA-187037)	286	142	108.8	+	1.31	0.0104	0.316
Cell Cycle, Mitotic (R-BTA-69278)	411	204	156.35	+	1.3	0.00192	0.156
TCR signaling (R-BTA-202403)	105	52	39.94	+	1.3	0.128	0.86
Axon guidance (R-BTA-422475)	378	187	143.79	+	1.3	0.0037	0.246
Golgi-to-ER retrograde transport (R-BTA-8856688)	75	37	28.53	+	1.3	0.204	1.03
Toll Like Receptor 9 (TLR9) Cascade (R-BTA-168138)	75	37	28.53	+	1.3	0.204	1.02
M Phase (R-BTA-68886)	223	110	84.83	+	1.3	0.0264	0.515
Signaling by VEGF (R-BTA-194138)	274	135	104.23	+	1.3	0.0142	0.371
Toll Like Receptor 2 (TLR2) Cascade (R-BTA-181438)	67	33	25.49	+	1.29	0.219	1.03
MyD88:Mal cascade initiated on plasma membrane (R-BTA-166058)	67	33	25.49	+	1.29	0.219	1.03
MyD88 cascade initiated on plasma membrane (R-BTA-975871)	67	33	25.49	+	1.29	0.219	1.02
Toll Like Receptor TLR6:TLR2 Cascade (R-BTA-168188)	67	33	25.49	+	1.29	0.219	1.02
Toll Like Receptor TLR1:TLR2 Cascade (R-BTA-168179)	67	33	25.49	+	1.29	0.219	1.02
Toll Like Receptor 5 (TLR5) Cascade (R-BTA-168176)	67	33	25.49	+	1.29	0.219	1.01
Signalling to RAS (R-BTA-167044)	195	96	74.18	+	1.29	0.0409	0.569
Frs2-mediated activation (R-BTA-170968)	195	96	74.18	+	1.29	0.0409	0.564
MAPK1/MAPK3 signaling (R-BTA-5684996)	195	96	74.18	+	1.29	0.0409	0.558
FRS-mediated FGFR1 signaling (R-BTA-5654693)	191	94	72.66	+	1.29	0.0454	0.583
FRS-mediated FGFR4 signaling (R-BTA-5654712)	191	94	72.66	+	1.29	0.0454	0.578
FRS-mediated FGFR3 signaling (R-BTA-5654706)	191	94	72.66	+	1.29	0.0454	0.573
FRS-mediated FGFR2 signaling (R-BTA-5654700)	191	94	72.66	+	1.29	0.0454	0.568
Mitotic Prophase (R-BTA-68875)	61	30	23.2	+	1.29	0.242	1.06
Cytochrome P450 - arranged by substrate type (R-BTA-211897)	59	29	22.44	+	1.29	0.282	1.05
Signaling by FGFR2 (R-BTA-5654738)	287	141	109.18	+	1.29	0.0141	0.375
Glycosaminoglycan metabolism (R-BTA-1630316)	108	53	41.08	+	1.29	0.133	0.883
Formation of TC-NER Pre-Incision Complex (R-BTA-6781823)	49	24	18.64	+	1.29	0.297	1.06
Signaling by Leptin (R-BTA-2586552)	194	95	73.8	+	1.29	0.047	0.568
SHC1 events in ERBB4 signaling (R-BTA-1250347)	190	93	72.28	+	1.29	0.0523	0.607
SHC1 events in EGFR signaling (R-BTA-180336)	190	93	72.28	+	1.29	0.0523	0.602
RAF/MAP kinase cascade (R-BTA-5673001)	190	93	72.28	+	1.29	0.0523	0.597
SOS-mediated signalling (R-BTA-112412)	190	93	72.28	+	1.29	0.0523	0.593
GRB2 events in EGFR signaling (R-BTA-179812)	190	93	72.28	+	1.29	0.0523	0.588
Signalling to p38 via RIT and RIN (R-BTA-187706)	190	93	72.28	+	1.29	0.0523	0.584
Anchoring of the basal body to the plasma membrane (R-BTA-5620912)	94	46	35.76	+	1.29	0.184	1.02
Toll Like Receptor 4 (TLR4) Cascade (R-BTA-166016)	88	43	33.48	+	1.28	0.202	1.03
Metabolism of water-soluble vitamins and cofactors (R-BTA-196849)	88	43	33.48	+	1.28	0.202	1.02
RET signaling (R-BTA-8853659)	207	101	78.74	+	1.28	0.0404	0.568
SUMOylation of DNA replication proteins (R-BTA-4615885)	41	20	15.6	+	1.28	0.389	1.07
Signaling by Type 1 Insulin-like Growth Factor 1 Receptor (IGF1R) (R-BTA-2404192)	246	120	93.58	+	1.28	0.0292	0.521
IRS-related events triggered by IGF1R (R-BTA-2428928)	246	120	93.58	+	1.28	0.0292	0.515
IGF1R signaling cascade (R-BTA-2428924)	246	120	93.58	+	1.28	0.0292	0.509
Signalling to ERKs (R-BTA-187687)	203	99	77.22	+	1.28	0.0447	0.579
M/G1 Transition (R-BTA-68874)	80	39	30.43	+	1.28	0.217	1.03
DNA Replication Pre-Initiation (R-BTA-69002)	80	39	30.43	+	1.28	0.217	1.02
Activated TLR4 signalling (R-BTA-166054)	74	36	28.15	+	1.28	0.239	1.06
FCERI mediated NF-kB activation (R-BTA-2871837)	74	36	28.15	+	1.28	0.239	1.06
MAPK family signaling cascades (R-BTA-5683057)	220	107	83.69	+	1.28	0.0399	0.566
Transcriptional Regulation by TP53 (R-BTA-3700989)	255	124	97	+	1.28	0.0278	0.52
DAP12 signaling (R-BTA-2424491)	278	135	105.75	+	1.28	0.0199	0.448
IRS-mediated signalling (R-BTA-112399)	243	118	92.44	+	1.28	0.0327	0.544
Transcription-Coupled Nucleotide Excision Repair (TC-NER) (R-BTA-6781827)	68	33	25.87	+	1.28	0.265	1.06
Toll Like Receptor 10 (TLR10) Cascade (R-BTA-168142)	68	33	25.87	+	1.28	0.265	1.05
Intra-Golgi and retrograde Golgi-to-ER traffic (R-BTA-6811442)	134	65	50.97	+	1.28	0.111	0.814
Prolonged ERK activation events (R-BTA-169893)	198	96	75.32	+	1.27	0.0569	0.598
TRIF-mediated TLR3/TLR4 signaling (R-BTA-937061)	64	31	24.35	+	1.27	0.3	1.06
Regulation of RAS by GAPs (R-BTA-5658442)	62	30	23.59	+	1.27	0.293	1.07
Insulin receptor signalling cascade (R-BTA-74751)	246	119	93.58	+	1.27	0.0337	0.548
FCERI mediated MAPK activation (R-BTA-2871796)	215	104	81.79	+	1.27	0.044	0.579
Downstream TCR signaling (R-BTA-202424)	89	43	33.86	+	1.27	0.205	1.02
G-protein beta:gamma signalling (R-BTA-397795)	29	14	11.03	+	1.27	0.495	1.07
Assembly of the primary cilium (R-BTA-5617833)	172	83	65.43	+	1.27	0.0784	0.725
ARMS-mediated activation (R-BTA-170984)	195	94	74.18	+	1.27	0.0638	0.652
Degradation of AXIN (R-BTA-4641257)	52	25	19.78	+	1.26	0.371	1.05
C-type lectin receptors (CLRs) (R-BTA-5621481)	102	49	38.8	+	1.26	0.201	1.03
PCP/CE pathway (R-BTA-4086400)	75	36	28.53	+	1.26	0.244	1.06
MAPK targets/ Nuclear events mediated by MAP kinases (R-BTA-450282)	25	12	9.51	+	1.26	0.581	1.1
Regulation of cholesterol biosynthesis by SREBP (SREBF) (R-BTA-1655829)	25	12	9.51	+	1.26	0.581	1.1
RHO GTPases activate PKNs (R-BTA-5625740)	25	12	9.51	+	1.26	0.581	1.1
VEGFR2 mediated vascular permeability (R-BTA-5218920)	25	12	9.51	+	1.26	0.581	1.1
Extension of Telomeres (R-BTA-180786)	25	12	9.51	+	1.26	0.581	1.1
EPHA-mediated growth cone collapse (R-BTA-3928663)	25	12	9.51	+	1.26	0.581	1.09
Synthesis of DNA (R-BTA-69239)	94	45	35.76	+	1.26	0.216	1.04
CaM pathway (R-BTA-111997)	23	11	8.75	+	1.26	0.565	1.11
Telomere C-strand (Lagging Strand) Synthesis (R-BTA-174417)	23	11	8.75	+	1.26	0.565	1.11
Toll Like Receptor 3 (TLR3) Cascade (R-BTA-168164)	69	33	26.25	+	1.26	0.269	1.06
MyD88-independent TLR3/TLR4 cascade (R-BTA-166166)	69	33	26.25	+	1.26	0.269	1.06
Toll-Like Receptors Cascades (R-BTA-168898)	113	54	42.99	+	1.26	0.165	0.976
Signaling by Insulin receptor (R-BTA-74752)	268	128	101.95	+	1.26	0.0361	0.538
DAP12 interactions (R-BTA-2172127)	287	137	109.18	+	1.25	0.0286	0.517
Triglyceride Biosynthesis (R-BTA-75109)	65	31	24.73	+	1.25	0.304	1.06
CLEC7A (Dectin-1) signaling (R-BTA-5607764)	86	41	32.71	+	1.25	0.233	1.05
Post-translational protein modification (R-BTA-597592)	661	315	251.45	+	1.25	0.00104	0.108
Mitotic Spindle Checkpoint (R-BTA-69618)	21	10	7.99	+	1.25	0.55	1.11
RHO GTPases activate PAKs (R-BTA-5627123)	21	10	7.99	+	1.25	0.55	1.11
Cholesterol biosynthesis (R-BTA-191273)	21	10	7.99	+	1.25	0.55	1.11
Phospholipase C-mediated cascade; FGFR2 (R-BTA-5654221)	40	19	15.22	+	1.25	0.466	1.09
PKMTs methylate histone lysines (R-BTA-3214841)	40	19	15.22	+	1.25	0.466	1.09
Cleavage of Growing Transcript in the Termination Region (R-BTA-109688)	59	28	22.44	+	1.25	0.337	1.03
RNA Polymerase II Transcription Termination (R-BTA-73856)	59	28	22.44	+	1.25	0.337	1.03
Transcriptional regulation by the AP-2 (TFAP2) family of transcription factors (R-BTA-8864260)	19	9	7.23	+	1.25	0.672	1.09
SHC-mediated cascade:FGFR1 (R-BTA-5654688)	19	9	7.23	+	1.25	0.672	1.09
Phospholipase C-mediated cascade: FGFR1 (R-BTA-5654219)	38	18	14.46	+	1.25	0.455	1.11
Interleukin-1 signaling (R-BTA-446652)	38	18	14.46	+	1.25	0.455	1.11
APC/C:Cdc20 mediated degradation of Cyclin B (R-BTA-174048)	19	9	7.23	+	1.25	0.672	1.09
Signaling by PTK6 (R-BTA-8848021)	57	27	21.68	+	1.25	0.331	1.04
CDT1 association with the CDC6:ORC:origin complex (R-BTA-68827)	55	26	20.92	+	1.24	0.383	1.07
L1CAM interactions (R-BTA-373760)	55	26	20.92	+	1.24	0.383	1.07
Cardiac conduction (R-BTA-5576891)	91	43	34.62	+	1.24	0.245	1.06
Toll Like Receptor 7/8 (TLR7/8) Cascade (R-BTA-168181)	72	34	27.39	+	1.24	0.327	1.05
MyD88 dependent cascade initiated on endosome (R-BTA-975155)	72	34	27.39	+	1.24	0.327	1.05
TRAF6 mediated induction of NFkB and MAP kinases upon TLR7/8 or 9 activation (R-BTA-975138)	70	33	26.63	+	1.24	0.32	1.05
Regulation of TP53 Activity through Phosphorylation (R-BTA-6804756)	87	41	33.1	+	1.24	0.275	1.03
DNA Replication (R-BTA-69306)	102	48	38.8	+	1.24	0.234	1.05
Telomere Maintenance (R-BTA-157579)	34	16	12.93	+	1.24	0.526	1.1
Neurotransmitter Release Cycle (R-BTA-112310)	34	16	12.93	+	1.24	0.526	1.1
Dual Incision in GG-NER (R-BTA-5696400)	32	15	12.17	+	1.23	0.515	1.08
Chromosome Maintenance (R-BTA-73886)	64	30	24.35	+	1.23	0.355	1.06
Activation of NF-kappaB in B cells (R-BTA-1169091)	62	29	23.59	+	1.23	0.349	1.05
EPH-Ephrin signaling (R-BTA-2682334)	77	36	29.29	+	1.23	0.294	1.07
Potassium Channels (R-BTA-1296071)	92	43	35	+	1.23	0.288	1.06
Cellular Senescence (R-BTA-2559583)	107	50	40.7	+	1.23	0.244	1.06
RIP-mediated NFkB activation via ZBP1 (R-BTA-1810476)	15	7	5.71	+	1.23	0.637	1.07
TRAF6 mediated NF-kB activation (R-BTA-933542)	15	7	5.71	+	1.23	0.637	1.07
PCNA-Dependent Long Patch Base Excision Repair (R-BTA-5651801)	15	7	5.71	+	1.23	0.637	1.07
SUMOylation of transcription factors (R-BTA-3232118)	15	7	5.71	+	1.23	0.637	1.07
TP53 Regulates Transcription of DNA Repair Genes (R-BTA-6796648)	43	20	16.36	+	1.22	0.481	1.05
Gap-filling DNA repair synthesis and ligation in TC-NER (R-BTA-6782210)	56	26	21.3	+	1.22	0.389	1.07
Formation of Fibrin Clot (Clotting Cascade) (R-BTA-140877)	28	13	10.65	+	1.22	0.6	1.1
Hedgehog ligand biogenesis (R-BTA-5358346)	56	26	21.3	+	1.22	0.389	1.07
Signaling by Wnt (R-BTA-195721)	209	97	79.5	+	1.22	0.108	0.813
Hedgehog 'off' state (R-BTA-5610787)	110	51	41.84	+	1.22	0.25	1.07
Formation of annular gap junctions (R-BTA-196025)	13	6	4.95	+	1.21	0.797	1.1
Glutamate Neurotransmitter Release Cycle (R-BTA-210500)	13	6	4.95	+	1.21	0.797	1.1
Signaling by ERBB4 (R-BTA-1236394)	273	126	103.85	+	1.21	0.0713	0.686
p75NTR signals via NF-kB (R-BTA-193639)	13	6	4.95	+	1.21	0.797	1.1
Signaling by Activin (R-BTA-1502540)	13	6	4.95	+	1.21	0.797	1.1
Other semaphorin interactions (R-BTA-416700)	13	6	4.95	+	1.21	0.797	1.09
Rap1 signalling (R-BTA-392517)	13	6	4.95	+	1.21	0.797	1.09
Removal of the Flap Intermediate (R-BTA-69166)	13	6	4.95	+	1.21	0.797	1.09
G beta:gamma signalling through PI3Kgamma (R-BTA-392451)	26	12	9.89	+	1.21	0.587	1.08
RNA Polymerase II Transcription (R-BTA-73857)	130	60	49.45	+	1.21	0.222	1.02
Oxidative Stress Induced Senescence (R-BTA-2559580)	50	23	19.02	+	1.21	0.434	1.08
G-protein mediated events (R-BTA-112040)	37	17	14.08	+	1.21	0.542	1.1
Gene Expression (R-BTA-74160)	1039	477	395.24	+	1.21	0.000557	0.0741
Epigenetic regulation of gene expression (R-BTA-212165)	61	28	23.2	+	1.21	0.407	1.04
Keratan sulfate biosynthesis (R-BTA-2022854)	24	11	9.13	+	1.2	0.575	1.1
E2F mediated regulation of DNA replication (R-BTA-113510)	24	11	9.13	+	1.2	0.575	1.1
Metabolism of nucleotides (R-BTA-15869)	94	43	35.76	+	1.2	0.338	1.03
Glycerophospholipid biosynthesis (R-BTA-1483206)	92	42	35	+	1.2	0.333	1.02
Antigen processing-Cross presentation (R-BTA-1236975)	79	36	30.05	+	1.2	0.403	1.09
Transmembrane transport of small molecules (R-BTA-382551)	580	264	220.64	+	1.2	0.0154	0.381
Metabolism of proteins (R-BTA-392499)	932	424	354.54	+	1.2	0.00207	0.159
Fanconi Anemia Pathway (R-BTA-6783310)	33	15	12.55	+	1.19	0.628	1.06
Dectin-1 mediated noncanonical NF-kB signaling (R-BTA-5607761)	55	25	20.92	+	1.19	0.454	1.11
NIK-->noncanonical NF-kB signaling (R-BTA-5676590)	55	25	20.92	+	1.19	0.454	1.11
Sodium/Calcium exchangers (R-BTA-425561)	11	5	4.18	+	1.19	0.781	1.1
Keratan sulfate degradation (R-BTA-2022857)	11	5	4.18	+	1.19	0.781	1.1
Phase 2 - plateau phase (R-BTA-5576893)	22	10	8.37	+	1.19	0.692	1.1
GRB2:SOS provides linkage to MAPK signaling for Integrins (R-BTA-354194)	11	5	4.18	+	1.19	0.781	1.1
APC-Cdc20 mediated degradation of Nek2A (R-BTA-179409)	22	10	8.37	+	1.19	0.692	1.1
Synthesis of PE (R-BTA-1483213)	11	5	4.18	+	1.19	0.781	1.1
RAF activation (R-BTA-5673000)	22	10	8.37	+	1.19	0.692	1.1
GRB2 events in ERBB2 signaling (R-BTA-1963640)	11	5	4.18	+	1.19	0.781	1.1
Syndecan interactions (R-BTA-3000170)	11	5	4.18	+	1.19	0.781	1.1
Signal regulatory protein (SIRP) family interactions (R-BTA-391160)	11	5	4.18	+	1.19	0.781	1.09
eNOS activation (R-BTA-203615)	11	5	4.18	+	1.19	0.781	1.09
Signaling by NOTCH4 (R-BTA-1980150)	11	5	4.18	+	1.19	0.781	1.09
TGF-beta receptor signaling in EMT (epithelial to mesenchymal transition) (R-BTA-2173791)	11	5	4.18	+	1.19	0.781	1.09
TRAF6 mediated IRF7 activation in TLR7/8 or 9 signaling (R-BTA-975110)	11	5	4.18	+	1.19	0.781	1.09
Formation of Senescence-Associated Heterochromatin Foci (SAHF) (R-BTA-2559584)	11	5	4.18	+	1.19	0.781	1.09
Class C/3 (Metabotropic glutamate/pheromone receptors) (R-BTA-420499)	22	10	8.37	+	1.19	0.692	1.1
Hyaluronan uptake and degradation (R-BTA-2160916)	11	5	4.18	+	1.19	0.781	1.09
Pyrimidine metabolism (R-BTA-73848)	22	10	8.37	+	1.19	0.692	1.1
Zinc transporters (R-BTA-435354)	11	5	4.18	+	1.19	0.781	1.09
Membrane Trafficking (R-BTA-199991)	379	172	144.17	+	1.19	0.0543	0.588
Cellular response to heat stress (R-BTA-3371556)	75	34	28.53	+	1.19	0.391	1.07
Degradation of DVL (R-BTA-4641258)	53	24	20.16	+	1.19	0.523	1.09
TCF dependent signaling in response to WNT (R-BTA-201681)	148	67	56.3	+	1.19	0.25	1.07
Signaling by Interleukins (R-BTA-449147)	327	148	124.39	+	1.19	0.0786	0.722
DNA Damage/Telomere Stress Induced Senescence (R-BTA-2559586)	31	14	11.79	+	1.19	0.617	1.11
Gamma carboxylation, hypusine formation and arylsulfatase activation (R-BTA-163841)	31	14	11.79	+	1.19	0.617	1.11
Generic Transcription Pathway (R-BTA-212436)	392	177	149.12	+	1.19	0.0582	0.607
mRNA Splicing - Major Pathway (R-BTA-72163)	164	74	62.39	+	1.19	0.217	1.03
mRNA Splicing (R-BTA-72172)	173	78	65.81	+	1.19	0.228	1.05
G1/S Transition (R-BTA-69206)	111	50	42.23	+	1.18	0.331	1.05
Processing of Capped Intron-Containing Pre-mRNA (R-BTA-72203)	220	99	83.69	+	1.18	0.166	0.974
Inhibition of the proteolytic activity of APC/C required for the onset of anaphase by mitotic spindle checkpoint components (R-BTA-141405)	20	9	7.61	+	1.18	0.679	1.1
Platelet activation, signaling and aggregation (R-BTA-76002)	240	108	91.3	+	1.18	0.148	0.935
PI3K Cascade (R-BTA-109704)	80	36	30.43	+	1.18	0.406	1.04
Lipoprotein metabolism (R-BTA-174824)	40	18	15.22	+	1.18	0.557	1.1
TGF-beta receptor signaling activates SMADs (R-BTA-2173789)	20	9	7.61	+	1.18	0.679	1.1
Inactivation of APC/C via direct inhibition of the APC/C complex (R-BTA-141430)	20	9	7.61	+	1.18	0.679	1.1
APC:Cdc20 mediated degradation of cell cycle proteins prior to satisfation of the cell cycle checkpoint (R-BTA-179419)	69	31	26.25	+	1.18	0.434	1.08
Deadenylation-dependent mRNA decay (R-BTA-429914)	49	22	18.64	+	1.18	0.508	1.09
RNA Polymerase II Transcription Elongation (R-BTA-75955)	49	22	18.64	+	1.18	0.508	1.08
Formation of RNA Pol II elongation complex (R-BTA-112382)	49	22	18.64	+	1.18	0.508	1.08
Vesicle-mediated transport (R-BTA-5653656)	411	184	156.35	+	1.18	0.064	0.65
Phospholipase C-mediated cascade; FGFR4 (R-BTA-5654228)	38	17	14.46	+	1.18	0.549	1.11
Intra-Golgi traffic (R-BTA-6811438)	38	17	14.46	+	1.18	0.549	1.11
Chondroitin sulfate/dermatan sulfate metabolism (R-BTA-1793185)	47	21	17.88	+	1.17	0.587	1.09
Transport to the Golgi and subsequent modification (R-BTA-948021)	141	63	53.64	+	1.17	0.307	1.03
RNA Polymerase I Transcription (R-BTA-73864)	56	25	21.3	+	1.17	0.534	1.1
Transport of Mature mRNA derived from an Intron-Containing Transcript (R-BTA-159236)	65	29	24.73	+	1.17	0.488	1.06
Transport of Mature Transcript to Cytoplasm (R-BTA-72202)	65	29	24.73	+	1.17	0.488	1.06
Activation of APC/C and APC/C:Cdc20 mediated degradation of mitotic proteins (R-BTA-176814)	74	33	28.15	+	1.17	0.449	1.1
Phase 0 - rapid depolarisation (R-BTA-5576892)	27	12	10.27	+	1.17	0.72	1.08
VLDLR internalisation and degradation (R-BTA-8866427)	9	4	3.42	+	1.17	0.762	1.1
MAPK3 (ERK1) activation (R-BTA-110056)	9	4	3.42	+	1.17	0.762	1.1
Packaging Of Telomere Ends (R-BTA-171306)	9	4	3.42	+	1.17	0.762	1.1
Sperm Motility And Taxes (R-BTA-1300642)	9	4	3.42	+	1.17	0.762	1.1
Conversion from APC/C:Cdc20 to APC/C:Cdh1 in late anaphase (R-BTA-176407)	18	8	6.85	+	1.17	0.666	1.11
Phospholipase C-mediated cascade; FGFR3 (R-BTA-5654227)	36	16	13.69	+	1.17	0.641	1.07
Cell-extracellular matrix interactions (R-BTA-446353)	18	8	6.85	+	1.17	0.666	1.11
Activation of the TFAP2 (AP-2) family of transcription factors (R-BTA-8866907)	9	4	3.42	+	1.17	0.762	1.1
Pyrimidine salvage reactions (R-BTA-73614)	9	4	3.42	+	1.17	0.762	1.1
Bicarbonate transporters (R-BTA-425381)	9	4	3.42	+	1.17	0.762	1.1
Processing and activation of SUMO (R-BTA-3215018)	9	4	3.42	+	1.17	0.762	1.1
Platelet sensitization by LDL (R-BTA-432142)	9	4	3.42	+	1.17	0.762	1.1
PLC beta mediated events (R-BTA-112043)	36	16	13.69	+	1.17	0.641	1.07
Dermatan sulfate biosynthesis (R-BTA-2022923)	9	4	3.42	+	1.17	0.762	1.09
ER Quality Control Compartment (ERQC) (R-BTA-901032)	18	8	6.85	+	1.17	0.666	1.11
Negative regulation of FGFR2 signaling (R-BTA-5654727)	27	12	10.27	+	1.17	0.72	1.08
GABA synthesis, release, reuptake and degradation (R-BTA-888590)	9	4	3.42	+	1.17	0.762	1.09
RNA Polymerase I Promoter Clearance (R-BTA-73854)	54	24	20.54	+	1.17	0.527	1.1
The NLRP3 inflammasome (R-BTA-844456)	9	4	3.42	+	1.17	0.762	1.09
Activation of the AP-1 family of transcription factors (R-BTA-450341)	9	4	3.42	+	1.17	0.762	1.09
S Phase (R-BTA-69242)	126	56	47.93	+	1.17	0.36	1.05
Organelle biogenesis and maintenance (R-BTA-1852241)	278	123	105.75	+	1.16	0.16	0.97
Beta-catenin independent WNT signaling (R-BTA-3858494)	95	42	36.14	+	1.16	0.443	1.09
RNA Polymerase I, RNA Polymerase III, and Mitochondrial Transcription (R-BTA-504046)	86	38	32.71	+	1.16	0.423	1.07
B-WICH complex positively regulates rRNA expression (R-BTA-5250924)	43	19	16.36	+	1.16	0.571	1.1
Positive epigenetic regulation of rRNA expression (R-BTA-5250913)	43	19	16.36	+	1.16	0.571	1.1
Cdc20:Phospho-APC/C mediated degradation of Cyclin A (R-BTA-174184)	68	30	25.87	+	1.16	0.498	1.08
O-linked glycosylation (R-BTA-5173105)	59	26	22.44	+	1.16	0.544	1.1
Class I MHC mediated antigen processing & presentation (R-BTA-983169)	184	81	69.99	+	1.16	0.27	1.06
Mitotic G1-G1/S phases (R-BTA-453279)	132	58	50.21	+	1.16	0.37	1.05
Cell surface interactions at the vascular wall (R-BTA-202733)	82	36	31.19	+	1.15	0.471	1.09
APC/C:Cdc20 mediated degradation of mitotic proteins (R-BTA-176409)	73	32	27.77	+	1.15	0.512	1.08
Hemostasis (R-BTA-109582)	450	197	171.18	+	1.15	0.0998	0.816
Signaling by TGF-beta Receptor Complex (R-BTA-170834)	64	28	24.35	+	1.15	0.559	1.1
TP53 Regulates Transcription of Cell Cycle Genes (R-BTA-6791312)	32	14	12.17	+	1.15	0.624	1.07
MAPK6/MAPK4 signaling (R-BTA-5687128)	71	31	27.01	+	1.15	0.507	1.09
RNA Polymerase II Pre-transcription Events (R-BTA-674695)	71	31	27.01	+	1.15	0.507	1.09
Regulation of HSF1-mediated heat shock response (R-BTA-3371453)	55	24	20.92	+	1.15	0.614	1.11
Innate Immune System (R-BTA-168249)	587	256	223.3	+	1.15	0.0662	0.658
Regulation of APC/C activators between G1/S and early anaphase (R-BTA-176408)	78	34	29.67	+	1.15	0.525	1.1
Formation of Incision Complex in GG-NER (R-BTA-5696395)	39	17	14.84	+	1.15	0.654	1.09
Cross-presentation of soluble exogenous antigens (endosomes) (R-BTA-1236978)	46	20	17.5	+	1.14	0.584	1.08
Keratan sulfate/keratin metabolism (R-BTA-1638074)	30	13	11.41	+	1.14	0.733	1.1
Metabolism of lipids and lipoproteins (R-BTA-556833)	552	239	209.98	+	1.14	0.0905	0.774
Adaptive Immune System (R-BTA-1280218)	522	225	198.57	+	1.13	0.115	0.81
Cytosolic sensors of pathogen-associated DNA (R-BTA-1834949)	49	21	18.64	+	1.13	0.688	1.1
Cyclin A/B1 associated events during G2/M transition (R-BTA-69273)	21	9	7.99	+	1.13	0.838	1.11
Nuclear Receptor transcription pathway (R-BTA-383280)	49	21	18.64	+	1.13	0.688	1.09
Cooperation of Prefoldin and TriC/CCT in actin and tubulin folding (R-BTA-389958)	7	3	2.66	+	1.13	1	1.01
Prefoldin mediated transfer of substrate to CCT/TriC (R-BTA-389957)	7	3	2.66	+	1.13	1	1.01
KSRP (KHSRP) binds and destabilizes mRNA (R-BTA-450604)	14	6	5.33	+	1.13	0.804	1.1
Eicosanoids (R-BTA-211979)	7	3	2.66	+	1.13	1	1.01
CREB phosphorylation (R-BTA-199920)	7	3	2.66	+	1.13	1	1.01
Regulation of gene expression by Hypoxia-inducible Factor (R-BTA-1234158)	7	3	2.66	+	1.13	1	1.01
Pre-NOTCH Expression and Processing (R-BTA-1912422)	7	3	2.66	+	1.13	1	1.01
Pre-NOTCH Processing in Golgi (R-BTA-1912420)	7	3	2.66	+	1.13	1	1.01
Translesion synthesis by POLI (R-BTA-5656121)	14	6	5.33	+	1.13	0.804	1.1
IRAK2 mediated activation of TAK1 complex (R-BTA-937042)	7	3	2.66	+	1.13	1	1.01
Glucuronidation (R-BTA-156588)	7	3	2.66	+	1.13	1	1
MAPK1 (ERK2) activation (R-BTA-112411)	7	3	2.66	+	1.13	1	1
IRAK2 mediated activation of TAK1 complex upon TLR7/8 or 9 stimulation (R-BTA-975163)	7	3	2.66	+	1.13	1	1
Vitamin C (ascorbate) metabolism (R-BTA-196836)	7	3	2.66	+	1.13	1	1
RHO GTPases activate CIT (R-BTA-5625900)	7	3	2.66	+	1.13	1	1
Histidine catabolism (R-BTA-70921)	7	3	2.66	+	1.13	1	1
Translesion synthesis by POLK (R-BTA-5655862)	14	6	5.33	+	1.13	0.804	1.1
Attachment of GPI anchor to uPAR (R-BTA-162791)	7	3	2.66	+	1.13	1	1
RHO GTPases Activate NADPH Oxidases (R-BTA-5668599)	14	6	5.33	+	1.13	0.804	1.1
Asparagine N-linked glycosylation (R-BTA-446203)	241	103	91.68	+	1.12	0.332	1.04
Phase 1 - Functionalization of compounds (R-BTA-211945)	89	38	33.86	+	1.12	0.551	1.09
Regulation of mitotic cell cycle (R-BTA-453276)	89	38	33.86	+	1.12	0.551	1.09
APC/C-mediated degradation of cell cycle proteins (R-BTA-174143)	89	38	33.86	+	1.12	0.551	1.09
CDK-mediated phosphorylation and removal of Cdc6 (R-BTA-69017)	47	20	17.88	+	1.12	0.682	1.09
DNA Damage Bypass (R-BTA-73893)	40	17	15.22	+	1.12	0.66	1.1
Deposition of new CENPA-containing nucleosomes at the centromere (R-BTA-606279)	33	14	12.55	+	1.12	0.745	1.1
Nucleosome assembly (R-BTA-774815)	33	14	12.55	+	1.12	0.745	1.09
Gene Silencing by RNA (R-BTA-211000)	59	25	22.44	+	1.11	0.627	1.06
Gastrin-CREB signalling pathway via PKC and MAPK (R-BTA-881907)	347	147	132	+	1.11	0.286	1.05
ER to Golgi Anterograde Transport (R-BTA-199977)	111	47	42.23	+	1.11	0.533	1.1
Signaling by BMP (R-BTA-201451)	26	11	9.89	+	1.11	0.717	1.08
Interleukin-6 family signaling (R-BTA-6783589)	26	11	9.89	+	1.11	0.717	1.08
Generation of second messenger molecules (R-BTA-202433)	26	11	9.89	+	1.11	0.717	1.08
Negative regulation of FGFR1 signaling (R-BTA-5654726)	26	11	9.89	+	1.11	0.717	1.08
Heparan sulfate/heparin (HS-GAG) metabolism (R-BTA-1638091)	45	19	17.12	+	1.11	0.676	1.09
Response to elevated platelet cytosolic Ca2+ (R-BTA-76005)	128	54	48.69	+	1.11	0.507	1.09
eNOS activation and regulation (R-BTA-203765)	19	8	7.23	+	1.11	0.83	1.11
Dual incision in TC-NER (R-BTA-6782135)	57	24	21.68	+	1.11	0.709	1.1
Lagging Strand Synthesis (R-BTA-69186)	19	8	7.23	+	1.11	0.83	1.11
Metabolism of nitric oxide (R-BTA-202131)	19	8	7.23	+	1.11	0.83	1.11
Gap junction trafficking and regulation (R-BTA-157858)	19	8	7.23	+	1.11	0.83	1.1
Antigen processing: Ubiquitination & Proteasome degradation (R-BTA-983168)	138	58	52.5	+	1.1	0.522	1.09
ROS, RNS production in response to bacteria (R-BTA-1222556)	31	13	11.79	+	1.1	0.738	1.09
Translesion synthesis by Y family DNA polymerases bypasses lesions on DNA template (R-BTA-110313)	31	13	11.79	+	1.1	0.738	1.09
Platelet degranulation (R-BTA-114608)	124	52	47.17	+	1.1	0.554	1.1
UCH proteinases (R-BTA-5689603)	93	39	35.38	+	1.1	0.626	1.06
Synthesis of PA (R-BTA-1483166)	31	13	11.79	+	1.1	0.738	1.09
Synthesis of bile acids and bile salts (R-BTA-192105)	31	13	11.79	+	1.1	0.738	1.09
Metabolism (R-BTA-1430728)	1568	656	596.48	+	1.1	0.034	0.547
The role of GTSE1 in G2/M progression after G2 checkpoint (R-BTA-8852276)	55	23	20.92	+	1.1	0.704	1.09
RHO GTPases Activate WASPs and WAVEs (R-BTA-5663213)	36	15	13.69	+	1.1	0.755	1.1
Transcriptional activation of mitochondrial biogenesis (R-BTA-2151201)	12	5	4.56	+	1.1	0.792	1.1
Integration of energy metabolism (R-BTA-163685)	84	35	31.95	+	1.1	0.681	1.1
Autodegradation of the E3 ubiquitin ligase COP1 (R-BTA-349425)	48	20	18.26	+	1.1	0.786	1.09
Downregulation of SMAD2/3:SMAD4 transcriptional activity (R-BTA-2173795)	24	10	9.13	+	1.1	0.848	1.11
Insulin receptor recycling (R-BTA-77387)	24	10	9.13	+	1.1	0.848	1.11
HS-GAG biosynthesis (R-BTA-2022928)	24	10	9.13	+	1.1	0.848	1.11
Mitochondrial biogenesis (R-BTA-1592230)	12	5	4.56	+	1.1	0.792	1.1
Lysine catabolism (R-BTA-71064)	12	5	4.56	+	1.1	0.792	1.09
Degradation of GLI1 by the proteasome (R-BTA-5610780)	53	22	20.16	+	1.09	0.7	1.09
Protein folding (R-BTA-391251)	41	17	15.6	+	1.09	0.769	1.1
Autodegradation of Cdh1 by Cdh1:APC/C (R-BTA-174084)	58	24	22.06	+	1.09	0.712	1.1
SCF-beta-TrCP mediated degradation of Emi1 (R-BTA-174113)	51	21	19.4	+	1.08	0.792	1.1
AUF1 (hnRNP D0) binds and destabilizes mRNA (R-BTA-450408)	51	21	19.4	+	1.08	0.792	1.1
EGFR downregulation (R-BTA-182971)	17	7	6.47	+	1.08	0.822	1.11
Gap junction trafficking (R-BTA-190828)	17	7	6.47	+	1.08	0.822	1.11
SHC-mediated cascade:FGFR3 (R-BTA-5654704)	17	7	6.47	+	1.08	0.822	1.11
Cytokine Signaling in Immune system (R-BTA-1280215)	435	179	165.48	+	1.08	0.386	1.07
O-linked glycosylation of mucins (R-BTA-913709)	44	18	16.74	+	1.08	0.777	1.1
Amino acid synthesis and interconversion (transamination) (R-BTA-70614)	22	9	8.37	+	1.08	0.842	1.11
Recycling pathway of L1 (R-BTA-437239)	22	9	8.37	+	1.08	0.842	1.11
Synthesis of bile acids and bile salts via 7alpha-hydroxycholesterol (R-BTA-193368)	27	11	10.27	+	1.07	0.856	1.12
COPI-independent Golgi-to-ER retrograde traffic (R-BTA-6811436)	27	11	10.27	+	1.07	0.856	1.12
Costimulation by the CD28 family (R-BTA-388841)	59	24	22.44	+	1.07	0.806	1.1
Regulation of insulin secretion (R-BTA-422356)	59	24	22.44	+	1.07	0.806	1.1
APC/C:Cdc20 mediated degradation of Securin (R-BTA-174154)	64	26	24.35	+	1.07	0.813	1.1
Metabolism of vitamins and cofactors (R-BTA-196854)	138	56	52.5	+	1.07	0.687	1.1
Immune System (R-BTA-168256)	1087	440	413.5	+	1.06	0.264	1.06
Transcriptional activity of SMAD2/SMAD3:SMAD4 heterotrimer (R-BTA-2173793)	42	17	15.98	+	1.06	0.884	1.14
Transcriptional regulation by small RNAs (R-BTA-5578749)	47	19	17.88	+	1.06	0.784	1.09
GLI3 is processed to GLI3R by the proteasome (R-BTA-5610785)	57	23	21.68	+	1.06	0.803	1.1
Lipid digestion, mobilization, and transport (R-BTA-73923)	67	27	25.49	+	1.06	0.817	1.1
APC/C:Cdh1 mediated degradation of Cdc20 and other APC/C:Cdh1 targeted proteins in late mitosis/early G1 (R-BTA-174178)	72	29	27.39	+	1.06	0.824	1.11
Mitochondrial translation initiation (R-BTA-5368286)	77	31	29.29	+	1.06	0.829	1.11
Phase 3 - rapid repolarisation (R-BTA-5576890)	5	2	1.9	+	1.05	1	1.15
Interleukin-7 signaling (R-BTA-1266695)	10	4	3.8	+	1.05	1	1.11
Apoptotic factor-mediated response (R-BTA-111471)	5	2	1.9	+	1.05	1	1.15
Cytochrome c-mediated apoptotic response (R-BTA-111461)	5	2	1.9	+	1.05	1	1.15
Activation of caspases through apoptosome-mediated cleavage (R-BTA-111459)	5	2	1.9	+	1.05	1	1.15
Tachykinin receptors bind tachykinins (R-BTA-380095)	5	2	1.9	+	1.05	1	1.15
Downregulation of ERBB4 signaling (R-BTA-1253288)	5	2	1.9	+	1.05	1	1.15
BBSome-mediated cargo-targeting to cilium (R-BTA-5620922)	10	4	3.8	+	1.05	1	1.1
Mitochondrial iron-sulfur cluster biogenesis (R-BTA-1362409)	5	2	1.9	+	1.05	1	1.15
GABA B receptor activation (R-BTA-977444)	35	14	13.31	+	1.05	0.873	1.14
Thyroxine biosynthesis (R-BTA-209968)	5	2	1.9	+	1.05	1	1.15
Regulated proteolysis of p75NTR (R-BTA-193692)	10	4	3.8	+	1.05	1	1.1
Activation of GABAB receptors (R-BTA-991365)	35	14	13.31	+	1.05	0.873	1.14
Lysosphingolipid and LPA receptors (R-BTA-419408)	10	4	3.8	+	1.05	1	1.1
Sodium-coupled phosphate cotransporters (R-BTA-427652)	5	2	1.9	+	1.05	1	1.14
Cross-presentation of particulate exogenous antigens (phagosomes) (R-BTA-1236973)	10	4	3.8	+	1.05	1	1.1
Metal ion SLC transporters (R-BTA-425410)	20	8	7.61	+	1.05	0.836	1.11
Alternative complement activation (R-BTA-173736)	5	2	1.9	+	1.05	1	1.14
RAF-independent MAPK1/3 activation (R-BTA-112409)	15	6	5.71	+	1.05	1	1.16
Regulation of cytoskeletal remodeling and cell spreading by IPP complex components (R-BTA-446388)	5	2	1.9	+	1.05	1	1.14
p75NTR recruits signalling complexes (R-BTA-209543)	10	4	3.8	+	1.05	1	1.1
Vitamin B2 (riboflavin) metabolism (R-BTA-196843)	5	2	1.9	+	1.05	1	1.14
Small interfering RNA (siRNA) biogenesis (R-BTA-426486)	5	2	1.9	+	1.05	1	1.14
G beta:gamma signalling through PLC beta (R-BTA-418217)	5	2	1.9	+	1.05	1	1.14
Senescence-Associated Secretory Phenotype (SASP) (R-BTA-2559582)	45	18	17.12	+	1.05	0.888	1.14
Transmission across Electrical Synapses (R-BTA-112307)	5	2	1.9	+	1.05	1	1.14
Electric Transmission Across Gap Junctions (R-BTA-112303)	5	2	1.9	+	1.05	1	1.14
Propionyl-CoA catabolism (R-BTA-71032)	5	2	1.9	+	1.05	1	1.14
Negative regulation of FGFR4 signaling (R-BTA-5654733)	25	10	9.51	+	1.05	0.852	1.12
Polo-like kinase mediated events (R-BTA-156711)	5	2	1.9	+	1.05	1	1.14
Opioid Signalling (R-BTA-111885)	55	22	20.92	+	1.05	0.8	1.1
Arachidonate production from DAG (R-BTA-426048)	5	2	1.9	+	1.05	1	1.14
Butyrate Response Factor 1 (BRF1) binds and destabilizes mRNA (R-BTA-450385)	15	6	5.71	+	1.05	1	1.16
p53-Independent G1/S DNA damage checkpoint (R-BTA-69613)	48	19	18.26	+	1.04	0.891	1.15
p53-Independent DNA Damage Response (R-BTA-69610)	48	19	18.26	+	1.04	0.891	1.15
Ubiquitin Mediated Degradation of Phosphorylated Cdc25A (R-BTA-69601)	48	19	18.26	+	1.04	0.891	1.15
PKB-mediated events (R-BTA-109703)	43	17	16.36	+	1.04	0.885	1.14
Metabolism of amino acids and derivatives (R-BTA-71291)	210	83	79.89	+	1.04	0.793	1.09
Regulation of mRNA stability by proteins that bind AU-rich elements (R-BTA-450531)	76	30	28.91	+	1.04	0.829	1.11
Binding and Uptake of Ligands by Scavenger Receptors (R-BTA-2173782)	33	13	12.55	+	1.04	0.87	1.13
Fcgamma receptor (FCGR) dependent phagocytosis (R-BTA-2029480)	61	24	23.2	+	1.03	0.903	1.16
Cellular responses to stress (R-BTA-2262752)	285	112	108.42	+	1.03	0.777	1.1
Intraflagellar transport (R-BTA-5620924)	51	20	19.4	+	1.03	0.895	1.15
Stabilization of p53 (R-BTA-69541)	51	20	19.4	+	1.03	0.895	1.15
Negative regulation of FGFR3 signaling (R-BTA-5654732)	23	9	8.75	+	1.03	1	1.17
Pyruvate metabolism (R-BTA-70268)	23	9	8.75	+	1.03	1	1.17
COPI-mediated anterograde transport (R-BTA-6807878)	64	25	24.35	+	1.03	0.906	1.16
Factors involved in megakaryocyte development and platelet production (R-BTA-983231)	95	37	36.14	+	1.02	0.922	1.17
Degradation of beta-catenin by the destruction complex (R-BTA-195253)	72	28	27.39	+	1.02	0.911	1.16
Chaperonin-mediated protein folding (R-BTA-390466)	36	14	13.69	+	1.02	1	1.19
Beta-catenin phosphorylation cascade (R-BTA-196299)	18	7	6.85	+	1.02	1	1.23
Regulation of TLR by endogenous ligand (R-BTA-5686938)	18	7	6.85	+	1.02	1	1.23
MHC class II antigen presentation (R-BTA-2132295)	85	33	32.33	+	1.02	0.918	1.17
Major pathway of rRNA processing in the nucleolus and cytosol (R-BTA-6791226)	152	59	57.82	+	1.02	0.877	1.14
rRNA processing (R-BTA-72312)	152	59	57.82	+	1.02	0.877	1.14
rRNA processing in the nucleus and cytosol (R-BTA-8868773)	152	59	57.82	+	1.02	0.877	1.14
Ubiquitin-dependent degradation of Cyclin D1 (R-BTA-69229)	49	19	18.64	+	1.02	1	1.18
Ubiquitin-dependent degradation of Cyclin D (R-BTA-75815)	49	19	18.64	+	1.02	1	1.18
Transport of glucose and other sugars, bile salts and organic acids, metal ions and amine compounds (R-BTA-425366)	88	34	33.48	+	1.02	0.919	1.17
SLC-mediated transmembrane transport (R-BTA-425407)	244	94	92.82	+	1.01	0.903	1.16
Translation (R-BTA-72766)	122	47	46.41	+	1.01	0.931	1.18
Translesion synthesis by REV1 (R-BTA-110312)	13	5	4.95	+	1.01	1	1.26
Leading Strand Synthesis (R-BTA-69109)	13	5	4.95	+	1.01	1	1.26
Peroxisomal lipid metabolism (R-BTA-390918)	26	10	9.89	+	1.01	1	1.18
Histidine, lysine, phenylalanine, tyrosine, proline and tryptophan catabolism (R-BTA-6788656)	39	15	14.84	+	1.01	1	1.02
Polymerase switching on the C-strand of the telomere (R-BTA-174411)	13	5	4.95	+	1.01	1	1.26
Polymerase switching (R-BTA-69091)	13	5	4.95	+	1.01	1	1.26
EPH-ephrin mediated repulsion of cells (R-BTA-3928665)	39	15	14.84	+	1.01	1	1.02
Transferrin endocytosis and recycling (R-BTA-917977)	26	10	9.89	+	1.01	1	1.18
SCF(Skp2)-mediated degradation of p27/p21 (R-BTA-187577)	60	23	22.82	+	1.01	1	1.27
RNA Polymerase I Transcription Termination (R-BTA-73863)	34	13	12.93	+	1.01	1	1.18
mTOR signalling (R-BTA-165159)	42	16	15.98	+	1	1	1.03
Signal transduction by L1 (R-BTA-445144)	21	8	7.99	+	1	1	1.08
Regulation of ornithine decarboxylase (ODC) (R-BTA-350562)	50	19	19.02	-	1	1	1.12
p53-Dependent G1/S DNA damage checkpoint (R-BTA-69580)	58	22	22.06	-	1	1	1.26
p53-Dependent G1 DNA Damage Response (R-BTA-69563)	58	22	22.06	-	1	1	1.26
Intrinsic Pathway for Apoptosis (R-BTA-109606)	29	11	11.03	-	1	1	1.17
Synthesis of substrates in N-glycan biosythesis (R-BTA-446219)	58	22	22.06	-	1	1	1.26
Iron uptake and transport (R-BTA-917937)	37	14	14.08	-	0.99	1	1.18
Bile acid and bile salt metabolism (R-BTA-194068)	37	14	14.08	-	0.99	1	1.17
TP53 Regulates Metabolic Genes (R-BTA-5628897)	45	17	17.12	-	0.99	1	1.15
Cyclin E associated events during G1/S transition (R-BTA-69202)	69	26	26.25	-	0.99	1	1.27
Metabolism of polyamines (R-BTA-351202)	77	29	29.29	-	0.99	1	1.25
Linoleic acid (LA) metabolism (R-BTA-2046105)	8	3	3.04	-	0.99	1	1.11
GP1b-IX-V activation signalling (R-BTA-430116)	8	3	3.04	-	0.99	1	1.11
Displacement of DNA glycosylase by APEX1 (R-BTA-110357)	8	3	3.04	-	0.99	1	1.11
Free fatty acids regulate insulin secretion (R-BTA-400451)	8	3	3.04	-	0.99	1	1.11
Role of phospholipids in phagocytosis (R-BTA-2029485)	16	6	6.09	-	0.99	1	1.14
TRAF3-dependent IRF activation pathway (R-BTA-918233)	8	3	3.04	-	0.99	1	1.11
EGFR Transactivation by Gastrin (R-BTA-2179392)	8	3	3.04	-	0.99	1	1.11
Fatty Acids bound to GPR40 (FFAR1) regulate insulin secretion (R-BTA-434316)	8	3	3.04	-	0.99	1	1.11
FGFR2 ligand binding and activation (R-BTA-190241)	16	6	6.09	-	0.99	1	1.13
Interleukin-17 signaling (R-BTA-448424)	8	3	3.04	-	0.99	1	1.11
Ca2+ activated K+ channels (R-BTA-1296052)	8	3	3.04	-	0.99	1	1.11
Pentose phosphate pathway (hexose monophosphate shunt) (R-BTA-71336)	8	3	3.04	-	0.99	1	1.11
Prostanoid ligand receptors (R-BTA-391908)	8	3	3.04	-	0.99	1	1.11
Biological oxidations (R-BTA-211859)	160	60	60.87	-	0.99	1	1
Sphingolipid de novo biosynthesis (R-BTA-1660661)	40	15	15.22	-	0.99	1	1.02
Termination of translesion DNA synthesis (R-BTA-5656169)	24	9	9.13	-	0.99	1	1.15
Mitochondrial translation termination (R-BTA-5419276)	83	31	31.57	-	0.98	1	1.25
COPII (Coat Protein 2) Mediated Vesicle Transport (R-BTA-204005)	59	22	22.44	-	0.98	1	1.24
RIG-I/MDA5 mediated induction of IFN-alpha/beta pathways (R-BTA-168928)	51	19	19.4	-	0.98	1	1.26
Mitochondrial translation (R-BTA-5368287)	94	35	35.76	-	0.98	1	1.08
Interferon Signaling (R-BTA-913531)	62	23	23.59	-	0.98	1	1.27
Negative regulation of MAPK pathway (R-BTA-5675221)	27	10	10.27	-	0.97	1	1.17
Glutathione conjugation (R-BTA-156590)	27	10	10.27	-	0.97	1	1.17
Formation of the beta-catenin:TCF transactivating complex (R-BTA-201722)	27	10	10.27	-	0.97	1	1.17
mRNA Splicing - Minor Pathway (R-BTA-72165)	54	20	20.54	-	0.97	1	1.18
GABA receptor activation (R-BTA-977443)	46	17	17.5	-	0.97	1	1.1
IL-6-type cytokine receptor ligand interactions (R-BTA-6788467)	19	7	7.23	-	0.97	1	1.25
Sulfur amino acid metabolism (R-BTA-1614635)	19	7	7.23	-	0.97	1	1.25
Signal Transduction (R-BTA-162582)	2198	809	836.13	-	0.97	0.402	1.09
G1/S DNA Damage Checkpoints (R-BTA-69615)	60	22	22.82	-	0.96	1	1.27
Glyoxylate metabolism and glycine degradation (R-BTA-389661)	30	11	11.41	-	0.96	1	1.05
RNA Polymerase I Promoter Escape (R-BTA-73772)	33	12	12.55	-	0.96	1	1.16
The activation of arylsulfatases (R-BTA-1663150)	11	4	4.18	-	0.96	1	1.17
Recognition of DNA damage by PCNA-containing replication complex (R-BTA-110314)	22	8	8.37	-	0.96	1	1.07
p130Cas linkage to MAPK signaling for integrins (R-BTA-372708)	11	4	4.18	-	0.96	1	1.17
Signaling by NOTCH3 (R-BTA-1980148)	11	4	4.18	-	0.96	1	1.17
SMAD2/SMAD3:SMAD4 heterotrimer regulates transcription (R-BTA-2173796)	22	8	8.37	-	0.96	1	1.07
Synthesis of epoxy (EET) and dihydroxyeicosatrienoic acids (DHET) (R-BTA-2142670)	11	4	4.18	-	0.96	1	1.16
TNFR2 non-canonical NF-kB pathway (R-BTA-5668541)	91	33	34.62	-	0.95	0.92	1.17
Sphingolipid metabolism (R-BTA-428157)	80	29	30.43	-	0.95	0.915	1.17
Unclassified (UNCLASSIFIED)	14707	5330	5594.64	-	0.95	2.2e-07	8.06e-05
Eukaryotic Translation Initiation (R-BTA-72613)	105	38	39.94	-	0.95	0.851	1.12
RNA Polymerase II Transcription Initiation (R-BTA-75953)	47	17	17.88	-	0.95	1	1.08
RNA Polymerase II Transcription Pre-Initiation And Promoter Opening (R-BTA-73779)	47	17	17.88	-	0.95	1	1.08
RNA Polymerase II Promoter Escape (R-BTA-73776)	47	17	17.88	-	0.95	1	1.08
RNA Polymerase II Transcription Initiation And Promoter Clearance (R-BTA-76042)	47	17	17.88	-	0.95	1	1.07
A tetrasaccharide linker sequence is required for GAG synthesis (R-BTA-1971475)	25	9	9.51	-	0.95	1	1.1
Semaphorin interactions (R-BTA-373755)	50	18	19.02	-	0.95	0.893	1.15
Ca2+ pathway (R-BTA-4086398)	25	9	9.51	-	0.95	1	1.1
Cyclin A:Cdk2-associated events at S phase entry (R-BTA-69656)	70	25	26.63	-	0.94	0.908	1.16
TP53 Regulates Transcription of Cell Death Genes (R-BTA-5633008)	14	5	5.33	-	0.94	1	1.23
MAP2K and MAPK activation (R-BTA-5674135)	14	5	5.33	-	0.94	1	1.23
RNA Pol II CTD phosphorylation and interaction with CE (R-BTA-77075)	28	10	10.65	-	0.94	1	1.1
FGFR1 ligand binding and activation (R-BTA-190242)	14	5	5.33	-	0.94	1	1.23
Gap-filling DNA repair synthesis and ligation in GG-NER (R-BTA-5696397)	14	5	5.33	-	0.94	1	1.22
Cooperation of PDCL (PhLP1) and TRiC/CCT in G-protein beta folding (R-BTA-6814122)	28	10	10.65	-	0.94	1	1.1
G alpha (s) signalling events (R-BTA-418555)	101	36	38.42	-	0.94	0.775	1.1
Cap-dependent Translation Initiation (R-BTA-72737)	104	37	39.56	-	0.94	0.777	1.1
Activation of BH3-only proteins (R-BTA-114452)	17	6	6.47	-	0.93	1	1.23
PRC2 methylates histones and DNA (R-BTA-212300)	17	6	6.47	-	0.93	1	1.23
TNF receptor superfamily (TNFSF) members mediating non-canonical NF-kB pathway (R-BTA-5676594)	17	6	6.47	-	0.93	1	1.23
RIPK1-mediated regulated necrosis (R-BTA-5213460)	17	6	6.47	-	0.93	1	1.23
Regulated Necrosis (R-BTA-5218859)	17	6	6.47	-	0.93	1	1.23
RNA Polymerase I Chain Elongation (R-BTA-73777)	37	13	14.08	-	0.92	0.875	1.14
Transport of inorganic cations/anions and amino acids/oligopeptides (R-BTA-425393)	97	34	36.9	-	0.92	0.769	1.1
Chromatin modifying enzymes (R-BTA-3247509)	197	69	74.94	-	0.92	0.582	1.08
Chromatin organization (R-BTA-4839726)	197	69	74.94	-	0.92	0.582	1.08
Glycosphingolipid metabolism (R-BTA-1660662)	40	14	15.22	-	0.92	0.88	1.14
Cobalamin (Cbl, vitamin B12) transport and metabolism (R-BTA-196741)	20	7	7.61	-	0.92	1	1.18
Mitochondrial translation elongation (R-BTA-5389840)	89	31	33.86	-	0.92	0.759	1.1
DNA strand elongation (R-BTA-69190)	23	8	8.75	-	0.91	1	1.07
Basigin interactions (R-BTA-210991)	23	8	8.75	-	0.91	1	1.07
HDACs deacetylate histones (R-BTA-3214815)	46	16	17.5	-	0.91	0.887	1.14
Regulation of actin dynamics for phagocytic cup formation (R-BTA-2029482)	52	18	19.78	-	0.91	0.79	1.1
FGFR2 alternative splicing (R-BTA-6803529)	26	9	9.89	-	0.91	1	1.08
Detoxification of Reactive Oxygen Species (R-BTA-3299685)	29	10	11.03	-	0.91	0.86	1.12
Glucagon-like Peptide-1 (GLP1) regulates insulin secretion (R-BTA-381676)	32	11	12.17	-	0.9	0.865	1.13
trans-Golgi Network Vesicle Budding (R-BTA-199992)	62	21	23.59	-	0.89	0.713	1.1
Clathrin derived vesicle budding (R-BTA-421837)	62	21	23.59	-	0.89	0.713	1.1
Biosynthesis of the N-glycan precursor (dolichol lipid-linked oligosaccharide, LLO) and transfer to a nascent protein (R-BTA-446193)	68	23	25.87	-	0.89	0.725	1.09
G alpha (q) signalling events (R-BTA-416476)	151	51	57.44	-	0.89	0.527	1.1
L13a-mediated translational silencing of Ceruloplasmin expression (R-BTA-156827)	98	33	37.28	-	0.89	0.624	1.07
Trafficking and processing of endosomal TLR (R-BTA-1679131)	9	3	3.42	-	0.88	1	1.02
GABA A receptor activation (R-BTA-977441)	9	3	3.42	-	0.88	1	1.02
Retrograde neurotrophin signalling (R-BTA-177504)	9	3	3.42	-	0.88	1	1.02
Activation of DNA fragmentation factor (R-BTA-211227)	9	3	3.42	-	0.88	1	1.02
Cytosolic sulfonation of small molecules (R-BTA-156584)	18	6	6.85	-	0.88	1	1.26
Inhibition of replication initiation of damaged DNA by RB1/E2F1 (R-BTA-113501)	9	3	3.42	-	0.88	1	1.02
Pyrimidine catabolism (R-BTA-73621)	9	3	3.42	-	0.88	1	1.02
Urea cycle (R-BTA-70635)	9	3	3.42	-	0.88	1	1.02
Activated PKN1 stimulates transcription of AR (androgen receptor) regulated genes KLK2 and KLK3 (R-BTA-5625886)	9	3	3.42	-	0.88	1	1.02
Apoptosis induced DNA fragmentation (R-BTA-140342)	9	3	3.42	-	0.88	1	1.02
mRNA Capping (R-BTA-72086)	30	10	11.41	-	0.88	0.86	1.12
Phase II conjugation (R-BTA-156580)	69	23	26.25	-	0.88	0.641	1.08
Regulation of necroptotic cell death (R-BTA-5675482)	15	5	5.71	-	0.88	1	1.18
Peptide hormone metabolism (R-BTA-2980736)	60	20	22.82	-	0.88	0.707	1.1
Synthesis of glycosylphosphatidylinositol (GPI) (R-BTA-162710)	15	5	5.71	-	0.88	1	1.18
Eicosanoid ligand-binding receptors (R-BTA-391903)	15	5	5.71	-	0.88	1	1.18
alpha-linolenic acid (ALA) metabolism (R-BTA-2046106)	12	4	4.56	-	0.88	1	1.25
alpha-linolenic (omega3) and linoleic (omega6) acid metabolism (R-BTA-2046104)	12	4	4.56	-	0.88	1	1.25
Na+-dependent glucose transporters (R-BTA-428808)	3	1	1.14	-	0.88	1	1.05
Post-translational modification: synthesis of GPI-anchored proteins (R-BTA-163125)	24	8	9.13	-	0.88	0.845	1.11
FMO oxidises nucleophiles (R-BTA-217271)	3	1	1.14	-	0.88	1	1.05
Formation of apoptosome (R-BTA-111458)	3	1	1.14	-	0.88	1	1.05
Tight junction interactions (R-BTA-420029)	6	2	2.28	-	0.88	1	1.22
Cleavage of the damaged purine (R-BTA-110331)	3	1	1.14	-	0.88	1	1.05
Reversible hydration of carbon dioxide (R-BTA-1475029)	12	4	4.56	-	0.88	1	1.25
CLEC7A/inflammasome pathway (R-BTA-5660668)	3	1	1.14	-	0.88	1	1.04
NOTCH2 Activation and Transmission of Signal to the Nucleus (R-BTA-2979096)	3	1	1.14	-	0.88	1	1.04
Facilitative Na+-independent glucose transporters (R-BTA-428790)	12	4	4.56	-	0.88	1	1.25
Class II GLUTs (R-BTA-428776)	3	1	1.14	-	0.88	1	1.04
Vasopressin-like receptors (R-BTA-388479)	6	2	2.28	-	0.88	1	1.22
Catecholamine biosynthesis (R-BTA-209905)	3	1	1.14	-	0.88	1	1.04
FGFR3c ligand binding and activation (R-BTA-190372)	12	4	4.56	-	0.88	1	1.25
Dopamine Neurotransmitter Release Cycle (R-BTA-212676)	6	2	2.28	-	0.88	1	1.22
Ligand-dependent caspase activation (R-BTA-140534)	12	4	4.56	-	0.88	1	1.25
Abacavir transmembrane transport (R-BTA-2161517)	3	1	1.14	-	0.88	1	1.04
Regulation of innate immune responses to cytosolic DNA (R-BTA-3134975)	6	2	2.28	-	0.88	1	1.22
Phenylalanine and tyrosine catabolism (R-BTA-71182)	12	4	4.56	-	0.88	1	1.24
TP53 Regulates Transcription of Genes Involved in G1 Cell Cycle Arrest (R-BTA-6804116)	6	2	2.28	-	0.88	1	1.22
Synthesis of 12-eicosatetraenoic acid derivatives (R-BTA-2142712)	3	1	1.14	-	0.88	1	1.04
Signaling by NOTCH2 (R-BTA-1980145)	6	2	2.28	-	0.88	1	1.22
Prostacyclin signalling through prostacyclin receptor (R-BTA-392851)	3	1	1.14	-	0.88	1	1.04
Amine Oxidase reactions (R-BTA-140179)	3	1	1.14	-	0.88	1	1.04
VEGF ligand-receptor interactions (R-BTA-194313)	6	2	2.28	-	0.88	1	1.22
Type II Na+/Pi cotransporters (R-BTA-427589)	3	1	1.14	-	0.88	1	1.04
Depurination (R-BTA-73927)	3	1	1.14	-	0.88	1	1.04
Rhesus glycoproteins mediate ammonium transport. (R-BTA-444411)	3	1	1.14	-	0.88	1	1.04
Regulation of Complement cascade (R-BTA-977606)	24	8	9.13	-	0.88	0.845	1.11
Regulation by c-FLIP (R-BTA-3371378)	12	4	4.56	-	0.88	1	1.24
mTORC1-mediated signalling (R-BTA-166208)	24	8	9.13	-	0.88	0.845	1.11
FGFR3 ligand binding and activation (R-BTA-190239)	12	4	4.56	-	0.88	1	1.24
CASP8 activity is inhibited (R-BTA-5218900)	12	4	4.56	-	0.88	1	1.24
Dimerization of procaspase-8 (R-BTA-69416)	12	4	4.56	-	0.88	1	1.24
Regulation of gap junction activity (R-BTA-191650)	3	1	1.14	-	0.88	1	1.04
c-src mediated regulation of Cx43 function and closure of gap junctions (R-BTA-191647)	3	1	1.14	-	0.88	1	1.04
Synthesis of 5-eicosatetraenoic acids (R-BTA-2142688)	3	1	1.14	-	0.88	1	1.03
Fructose biosynthesis (R-BTA-5652227)	3	1	1.14	-	0.88	1	1.03
VEGF binds to VEGFR leading to receptor dimerization (R-BTA-195399)	6	2	2.28	-	0.88	1	1.22
Potassium transport channels (R-BTA-1296067)	3	1	1.14	-	0.88	1	1.03
Classical Kir channels (R-BTA-1296053)	3	1	1.14	-	0.88	1	1.03
Amine-derived hormones (R-BTA-209776)	12	4	4.56	-	0.88	1	1.24
Synthesis of GDP-mannose (R-BTA-446205)	3	1	1.14	-	0.88	1	1.03
Estrogen biosynthesis (R-BTA-193144)	6	2	2.28	-	0.88	1	1.22
TFAP2A acts as a transcriptional repressor during retinoic acid induced cell differentiation (R-BTA-8869496)	3	1	1.14	-	0.88	1	1.03
NADE modulates death signalling (R-BTA-205025)	6	2	2.28	-	0.88	1	1.21
SUMO is proteolytically processed (R-BTA-3065679)	6	2	2.28	-	0.88	1	1.21
CD28 dependent Vav1 pathway (R-BTA-389359)	12	4	4.56	-	0.88	1	1.24
mitochondrial fatty acid beta-oxidation of unsaturated fatty acids (R-BTA-77288)	3	1	1.14	-	0.88	1	1.03
Caspase activation via extrinsic apoptotic signalig pathway (R-BTA-5357769)	12	4	4.56	-	0.88	1	1.24
Amplification of signal from unattached kinetochores via a MAD2 inhibitory signal (R-BTA-141444)	3	1	1.14	-	0.88	1	1.03
Leukotriene receptors (R-BTA-391906)	6	2	2.28	-	0.88	1	1.21
Amplification of signal from the kinetochores (R-BTA-141424)	3	1	1.14	-	0.88	1	1.03
Transport and synthesis of PAPS (R-BTA-174362)	6	2	2.28	-	0.88	1	1.21
Nonsense Mediated Decay (NMD) enhanced by the Exon Junction Complex (EJC) (R-BTA-975957)	100	33	38.04	-	0.87	0.559	1.1
Nonsense-Mediated Decay (NMD) (R-BTA-927802)	100	33	38.04	-	0.87	0.559	1.1
Energy dependent regulation of mTOR by LKB1-AMPK (R-BTA-380972)	31	10	11.79	-	0.85	0.729	1.09
Macroautophagy (R-BTA-1632852)	62	20	23.59	-	0.85	0.621	1.07
Inwardly rectifying K+ channels (R-BTA-1296065)	28	9	10.65	-	0.84	0.854	1.12
G0 and Early G1 (R-BTA-1538133)	22	7	8.37	-	0.84	0.836	1.11
Inhibition of voltage gated Ca2+ channels via Gbeta/gamma subunits (R-BTA-997272)	22	7	8.37	-	0.84	0.836	1.11
Formation of the Early Elongation Complex (R-BTA-113418)	22	7	8.37	-	0.84	0.836	1.11
G protein gated Potassium channels (R-BTA-1296059)	22	7	8.37	-	0.84	0.836	1.11
Activation of G protein gated Potassium channels (R-BTA-1296041)	22	7	8.37	-	0.84	0.836	1.11
TP53 regulates transcription of additional cell cycle genes whose exact role in the p53 pathway remain uncertain (R-BTA-6804115)	19	6	7.23	-	0.83	0.825	1.11
Synthesis of Prostaglandins (PG) and Thromboxanes (TX) (R-BTA-2162123)	19	6	7.23	-	0.83	0.825	1.11
Ephrin signaling (R-BTA-3928664)	19	6	7.23	-	0.83	0.825	1.11
Translesion Synthesis by POLH (R-BTA-110320)	16	5	6.09	-	0.82	0.811	1.1
Na+/Cl- dependent neurotransmitter transporters (R-BTA-442660)	16	5	6.09	-	0.82	0.811	1.1
Glucagon signaling in metabolic regulation (R-BTA-163359)	29	9	11.03	-	0.82	0.717	1.08
SRP-dependent cotranslational protein targeting to membrane (R-BTA-1799339)	81	25	30.81	-	0.81	0.386	1.07
Acyl chain remodelling of PE (R-BTA-1482839)	26	8	9.89	-	0.81	0.703	1.09
FGFR4 ligand binding and activation (R-BTA-190322)	13	4	4.95	-	0.81	1	1.08
Activation of Matrix Metalloproteinases (R-BTA-1592389)	26	8	9.89	-	0.81	0.703	1.09
Signaling by Retinoic Acid (R-BTA-5362517)	49	15	18.64	-	0.8	0.575	1.1
RNA Polymerase III Transcription Initiation (R-BTA-76046)	36	11	13.69	-	0.8	0.625	1.06
RNA Polymerase III Transcription (R-BTA-74158)	36	11	13.69	-	0.8	0.625	1.06
Deactivation of the beta-catenin transactivating complex (R-BTA-3769402)	33	10	12.55	-	0.8	0.611	1.1
The citric acid (TCA) cycle and respiratory electron transport (R-BTA-1428517)	143	43	54.4	-	0.79	0.188	1.03
DARPP-32 events (R-BTA-180024)	20	6	7.61	-	0.79	0.826	1.11
PD-1 signaling (R-BTA-389948)	20	6	7.61	-	0.79	0.826	1.11
HS-GAG degradation (R-BTA-2024096)	20	6	7.61	-	0.79	0.826	1.11
The phototransduction cascade (R-BTA-2514856)	30	9	11.41	-	0.79	0.595	1.09
DSCAM interactions (R-BTA-376172)	10	3	3.8	-	0.79	1	1.03
Synthesis of pyrophosphates in the cytosol (R-BTA-1855167)	10	3	3.8	-	0.79	1	1.03
ADP signalling through P2Y purinoceptor 1 (R-BTA-418592)	10	3	3.8	-	0.79	1	1.03
Base-Excision Repair, AP Site Formation (R-BTA-73929)	10	3	3.8	-	0.79	1	1.03
Synthesis of bile acids and bile salts via 24-hydroxycholesterol (R-BTA-193775)	20	6	7.61	-	0.79	0.826	1.11
Vasopressin regulates renal water homeostasis via Aquaporins (R-BTA-432040)	40	12	15.22	-	0.79	0.537	1.1
Pink/Parkin Mediated Mitophagy (R-BTA-5205685)	17	5	6.47	-	0.77	0.812	1.1
Mitophagy (R-BTA-5205647)	17	5	6.47	-	0.77	0.812	1.1
Sema4D in semaphorin signaling (R-BTA-400685)	17	5	6.47	-	0.77	0.812	1.1
Complement cascade (R-BTA-166658)	41	12	15.6	-	0.77	0.538	1.1
Arachidonic acid metabolism (R-BTA-2142753)	55	16	20.92	-	0.76	0.425	1.07
Initial triggering of complement (R-BTA-166663)	21	6	7.99	-	0.75	0.669	1.11
Sema4D induced cell migration and growth-cone collapse (R-BTA-416572)	14	4	5.33	-	0.75	0.794	1.09
Phase 4 - resting membrane potential (R-BTA-5576886)	7	2	2.66	-	0.75	1	1.02
SIRT1 negatively regulates rRNA Expression (R-BTA-427359)	7	2	2.66	-	0.75	1	1.02
RNA Polymerase III Transcription Initiation From Type 3 Promoter (R-BTA-76071)	28	8	10.65	-	0.75	0.577	1.1
CLEC7A (Dectin-1) induces NFAT activation (R-BTA-5607763)	7	2	2.66	-	0.75	1	1.01
Relaxin receptors (R-BTA-444821)	7	2	2.66	-	0.75	1	1.01
Scavenging by Class B Receptors (R-BTA-3000471)	7	2	2.66	-	0.75	1	1.01
Heme degradation (R-BTA-189483)	7	2	2.66	-	0.75	1	1.01
Orexin and neuropeptides FF and QRFP bind to their respective receptors (R-BTA-389397)	7	2	2.66	-	0.75	1	1.01
Acyl chain remodeling of DAG and TAG (R-BTA-1482883)	7	2	2.66	-	0.75	1	1.01
Metabolism of porphyrins (R-BTA-189445)	18	5	6.85	-	0.73	0.645	1.08
Immunoregulatory interactions between a Lymphoid and a non-Lymphoid cell (R-BTA-198933)	90	25	34.24	-	0.73	0.175	1.01
Aquaporin-mediated transport (R-BTA-445717)	47	13	17.88	-	0.73	0.385	1.07
GTP hydrolysis and joining of the 60S ribosomal subunit (R-BTA-72706)	76	21	28.91	-	0.73	0.212	1.03
Inactivation, recovery and regulation of the phototransduction cascade (R-BTA-2514859)	29	8	11.03	-	0.73	0.468	1.09
RA biosynthesis pathway (R-BTA-5365859)	29	8	11.03	-	0.73	0.468	1.09
Metalloprotease DUBs (R-BTA-5689901)	29	8	11.03	-	0.73	0.468	1.09
Amine ligand-binding receptors (R-BTA-375280)	29	8	11.03	-	0.73	0.468	1.09
Interferon alpha/beta signaling (R-BTA-909733)	29	8	11.03	-	0.73	0.468	1.08
Metabolism of fat-soluble vitamins (R-BTA-6806667)	51	14	19.4	-	0.72	0.331	1.04
FGFR1c ligand binding and activation (R-BTA-190373)	11	3	4.18	-	0.72	0.77	1.1
Heme biosynthesis (R-BTA-189451)	11	3	4.18	-	0.72	0.77	1.1
Aflatoxin activation and detoxification (R-BTA-5423646)	11	3	4.18	-	0.72	0.77	1.1
NRIF signals cell death from the nucleus (R-BTA-205043)	11	3	4.18	-	0.72	0.77	1.1
mRNA decay by 3' to 5' exoribonuclease (R-BTA-429958)	11	3	4.18	-	0.72	0.77	1.1
SLBP Dependent Processing of Replication-Dependent Histone Pre-mRNAs (R-BTA-77588)	11	3	4.18	-	0.72	0.77	1.09
Regulation of IFNA signaling (R-BTA-912694)	26	7	9.89	-	0.71	0.559	1.1
Nonsense Mediated Decay (NMD) independent of the Exon Junction Complex (EJC) (R-BTA-975956)	82	22	31.19	-	0.71	0.154	0.954
Golgi Associated Vesicle Biogenesis (R-BTA-432722)	45	12	17.12	-	0.7	0.302	1.07
Purine salvage (R-BTA-74217)	15	4	5.71	-	0.7	0.617	1.11
Nucleotide-like (purinergic) receptors (R-BTA-418038)	15	4	5.71	-	0.7	0.617	1.11
Lysosome Vesicle Biogenesis (R-BTA-432720)	30	8	11.41	-	0.7	0.468	1.08
G1 Phase (R-BTA-69236)	38	10	14.46	-	0.69	0.336	1.03
Cyclin D associated events in G1 (R-BTA-69231)	38	10	14.46	-	0.69	0.336	1.03
Acyl chain remodelling of PG (R-BTA-1482925)	19	5	7.23	-	0.69	0.648	1.08
Signaling by GPCR (R-BTA-372790)	1160	301	441.27	-	0.68	3.97e-10	1.94e-07
Acyl chain remodelling of PC (R-BTA-1482788)	27	7	10.27	-	0.68	0.445	1.09
Transport of vitamins, nucleosides, and related molecules (R-BTA-425397)	31	8	11.79	-	0.68	0.374	1.05
CREB phosphorylation through the activation of CaMKK (R-BTA-442717)	4	1	1.52	-	0.66	1	1.1
Cleavage of the damaged pyrimidine (R-BTA-110329)	8	2	3.04	-	0.66	0.737	1.1
The canonical retinoid cycle in rods (twilight vision) (R-BTA-2453902)	16	4	6.09	-	0.66	0.618	1.11
Negative feedback regulation of MAPK pathway (R-BTA-5674499)	4	1	1.52	-	0.66	1	1.1
Serotonin and melatonin biosynthesis (R-BTA-209931)	4	1	1.52	-	0.66	1	1.09
Zinc influx into cells by the SLC39 gene family (R-BTA-442380)	8	2	3.04	-	0.66	0.737	1.1
The retinoid cycle in cones (daylight vision) (R-BTA-2187335)	4	1	1.52	-	0.66	1	1.09
Negative epigenetic regulation of rRNA expression (R-BTA-5250941)	8	2	3.04	-	0.66	0.737	1.1
Ubiquinol biosynthesis (R-BTA-2142789)	4	1	1.52	-	0.66	1	1.09
Interleukin-12 signaling (R-BTA-447115)	4	1	1.52	-	0.66	1	1.09
Regulation of gene expression in endocrine-committed (NEUROG3+) progenitor cells (R-BTA-210746)	4	1	1.52	-	0.66	1	1.09
Scavenging of heme from plasma (R-BTA-2168880)	16	4	6.09	-	0.66	0.618	1.11
Axonal growth stimulation (R-BTA-209563)	4	1	1.52	-	0.66	1	1.09
Cam-PDE 1 activation (R-BTA-111957)	4	1	1.52	-	0.66	1	1.09
Depyrimidination (R-BTA-73928)	8	2	3.04	-	0.66	0.737	1.1
Vitamin B1 (thiamin) metabolism (R-BTA-196819)	4	1	1.52	-	0.66	1	1.09
Mitochondrial protein import (R-BTA-1268020)	4	1	1.52	-	0.66	1	1.09
Activation of AKT2 (R-BTA-165158)	4	1	1.52	-	0.66	1	1.09
Cholesterol biosynthesis via lathosterol (R-BTA-6807062)	4	1	1.52	-	0.66	1	1.09
Cholesterol biosynthesis via desmosterol (R-BTA-6807047)	4	1	1.52	-	0.66	1	1.09
Phosphate bond hydrolysis by NTPDase proteins (R-BTA-8850843)	8	2	3.04	-	0.66	0.737	1.1
Activation, myristolyation of BID and translocation to mitochondria (R-BTA-75108)	4	1	1.52	-	0.66	1	1.08
Hormone ligand-binding receptors (R-BTA-375281)	8	2	3.04	-	0.66	0.737	1.1
Translocation of ZAP-70 to Immunological synapse (R-BTA-202430)	16	4	6.09	-	0.66	0.618	1.1
AKT phosphorylates targets in the cytosol (R-BTA-198323)	8	2	3.04	-	0.66	0.737	1.1
RHO GTPases Activate ROCKs (R-BTA-5627117)	4	1	1.52	-	0.66	1	1.08
Josephin domain DUBs (R-BTA-5689877)	8	2	3.04	-	0.66	0.737	1.1
Synthesis of UDP-N-acetyl-glucosamine (R-BTA-446210)	8	2	3.04	-	0.66	0.737	1.09
ATP sensitive Potassium channels (R-BTA-1296025)	4	1	1.52	-	0.66	1	1.08
TP53 regulates transcription of several additional cell death genes whose specific roles in p53-dependent apoptosis remain uncertain (R-BTA-6803205)	4	1	1.52	-	0.66	1	1.08
TP53 Regulates Transcription of Genes Involved in Cytochrome C Release (R-BTA-6803204)	4	1	1.52	-	0.66	1	1.08
Negative regulation of TCF-dependent signaling by WNT ligand antagonists (R-BTA-3772470)	4	1	1.52	-	0.66	1	1.08
FGFR2c ligand binding and activation (R-BTA-190375)	12	3	4.56	-	0.66	0.773	1.1
Downregulation of TGF-beta receptor signaling (R-BTA-2173788)	12	3	4.56	-	0.66	0.773	1.1
CS/DS degradation (R-BTA-2024101)	12	3	4.56	-	0.66	0.773	1.1
Visual phototransduction (R-BTA-2187338)	86	21	32.71	-	0.64	0.0661	0.662
Respiratory electron transport (R-BTA-611105)	78	19	29.67	-	0.64	0.0875	0.761
RNA Polymerase III Transcription Initiation From Type 2 Promoter (R-BTA-76066)	29	7	11.03	-	0.63	0.352	1.06
Sema3A PAK dependent Axon repulsion (R-BTA-399954)	17	4	6.47	-	0.62	0.471	1.09
Signal amplification (R-BTA-392518)	17	4	6.47	-	0.62	0.471	1.08
RNA Polymerase III Transcription Initiation From Type 1 Promoter (R-BTA-76061)	30	7	11.41	-	0.61	0.274	1.03
Complex I biogenesis (R-BTA-6799198)	60	14	22.82	-	0.61	0.117	0.82
Metabolism of steroid hormones (R-BTA-196071)	26	6	9.89	-	0.61	0.325	1.05
Termination of O-glycan biosynthesis (R-BTA-977068)	13	3	4.95	-	0.61	0.58	1.1
GPCR ligand binding (R-BTA-500792)	330	76	125.53	-	0.61	4.17e-05	0.0102
Retinoid metabolism and transport (R-BTA-975634)	44	10	16.74	-	0.6	0.17	0.987
Respiratory electron transport, ATP synthesis by chemiosmotic coupling, and heat production by uncoupling proteins. (R-BTA-163200)	103	23	39.18	-	0.59	0.0211	0.46
Activation of the phototransduction cascade (R-BTA-2485179)	9	2	3.42	-	0.58	0.738	1.09
Miscellaneous substrates (R-BTA-211958)	9	2	3.42	-	0.58	0.738	1.09
Ligand-gated ion channel transport (R-BTA-975298)	18	4	6.85	-	0.58	0.474	1.09
RHO GTPases activate KTN1 (R-BTA-5625970)	9	2	3.42	-	0.58	0.738	1.09
Sodium/Proton exchangers (R-BTA-425986)	9	2	3.42	-	0.58	0.738	1.09
Phosphorylation of CD3 and TCR zeta chains (R-BTA-202427)	18	4	6.85	-	0.58	0.474	1.08
Class A/1 (Rhodopsin-like receptors) (R-BTA-373076)	261	57	99.29	-	0.57	6.66e-05	0.0122
Chylomicron-mediated lipid transport (R-BTA-174800)	14	3	5.33	-	0.56	0.43	1.08
Synthesis, secretion, and deacylation of Ghrelin (R-BTA-422085)	14	3	5.33	-	0.56	0.43	1.08
Synthesis of Leukotrienes (LT) and Eoxins (EX) (R-BTA-2142691)	14	3	5.33	-	0.56	0.43	1.08
GPCR downstream signaling (R-BTA-388396)	924	197	351.5	-	0.56	2.01e-15	1.47e-12
G alpha (i) signalling events (R-BTA-418594)	157	33	59.72	-	0.55	0.00141	0.129
Endosomal Sorting Complex Required For Transport (ESCRT) (R-BTA-917729)	24	5	9.13	-	0.55	0.298	1.06
Calcitonin-like ligand receptors (R-BTA-419812)	10	2	3.8	-	0.53	0.53	1.1
Synthesis of diphthamide-EEF2 (R-BTA-5358493)	5	1	1.9	-	0.53	1	1.16
Transport of fatty acids (R-BTA-804914)	5	1	1.9	-	0.53	1	1.16
Amino acid transport across the plasma membrane (R-BTA-352230)	30	6	11.41	-	0.53	0.19	1.02
Methylation (R-BTA-156581)	15	3	5.71	-	0.53	0.431	1.08
SLBP independent Processing of Histone Pre-mRNAs (R-BTA-111367)	10	2	3.8	-	0.53	0.53	1.1
Synthesis of Lipoxins (LX) (R-BTA-2142700)	5	1	1.9	-	0.53	1	1.16
Digestion of dietary carbohydrate (R-BTA-189085)	5	1	1.9	-	0.53	1	1.16
Catabolism of glucuronate to xylulose-5-phosphate (R-BTA-5661270)	5	1	1.9	-	0.53	1	1.16
Synthesis of bile acids and bile salts via 27-hydroxycholesterol (R-BTA-193807)	20	4	7.61	-	0.53	0.359	1.05
Formation of ATP by chemiosmotic coupling (R-BTA-163210)	20	4	7.61	-	0.53	0.359	1.05
Degradation of cysteine and homocysteine (R-BTA-1614558)	5	1	1.9	-	0.53	1	1.16
Ethanol oxidation (R-BTA-71384)	10	2	3.8	-	0.53	0.53	1.1
Repression of WNT target genes (R-BTA-4641265)	5	1	1.9	-	0.53	1	1.16
Thrombin signalling through proteinase activated receptors (PARs) (R-BTA-456926)	15	3	5.71	-	0.53	0.431	1.08
Sodium-coupled sulphate, di- and tri-carboxylate transporters (R-BTA-433137)	5	1	1.9	-	0.53	1	1.15
Class B/2 (Secretin family receptors) (R-BTA-373080)	47	9	17.88	-	0.5	0.0709	0.686
Acyl chain remodelling of PS (R-BTA-1482801)	21	4	7.99	-	0.5	0.264	1.06
Oncogene Induced Senescence (R-BTA-2559585)	16	3	6.09	-	0.49	0.313	1.03
Creation of C4 and C2 activators (R-BTA-166786)	11	2	4.18	-	0.48	0.535	1.1
snRNP Assembly (R-BTA-191859)	22	4	8.37	-	0.48	0.193	1.03
P2Y receptors (R-BTA-417957)	11	2	4.18	-	0.48	0.535	1.1
Metabolism of non-coding RNA (R-BTA-194441)	22	4	8.37	-	0.48	0.193	1.03
Serotonin receptors (R-BTA-390666)	11	2	4.18	-	0.48	0.535	1.1
Tandem pore domain potassium channels (R-BTA-1296346)	11	2	4.18	-	0.48	0.535	1.1
Passive transport by Aquaporins (R-BTA-432047)	11	2	4.18	-	0.48	0.535	1.1
Nuclear signaling by ERBB4 (R-BTA-1251985)	39	7	14.84	-	0.47	0.0687	0.674
Peptide ligand-binding receptors (R-BTA-375276)	163	29	62.01	-	0.47	6.28e-05	0.0131
TRAF6 mediated IRF7 activation (R-BTA-933541)	23	4	8.75	-	0.46	0.195	1.03
TNFs bind their physiological receptors (R-BTA-5669034)	23	4	8.75	-	0.46	0.195	1.03
RMTs methylate histone arginines (R-BTA-3214858)	46	8	17.5	-	0.46	0.046	0.565
HATs acetylate histones (R-BTA-3214847)	69	12	26.25	-	0.46	0.00868	0.325
BH3-only proteins associate with and inactivate anti-apoptotic BCL-2 members (R-BTA-111453)	6	1	2.28	-	0.44	0.682	1.1
Peptide hormone biosynthesis (R-BTA-209952)	12	2	4.56	-	0.44	0.376	1.06
PTK6 Regulates Cell Cycle (R-BTA-8849470)	6	1	2.28	-	0.44	0.682	1.1
Hydrolysis of LPC (R-BTA-1483115)	6	1	2.28	-	0.44	0.682	1.09
Phosphate bond hydrolysis by NUDT proteins (R-BTA-2393930)	6	1	2.28	-	0.44	0.682	1.09
Beta-oxidation of very long chain fatty acids (R-BTA-390247)	6	1	2.28	-	0.44	0.682	1.09
Transport of nucleosides and free purine and pyrimidine bases across the plasma membrane (R-BTA-83936)	6	1	2.28	-	0.44	0.682	1.09
Eukaryotic Translation Termination (R-BTA-72764)	6	1	2.28	-	0.44	0.682	1.09
G-protein activation (R-BTA-202040)	12	2	4.56	-	0.44	0.376	1.05
Glucagon-type ligand receptors (R-BTA-420092)	26	4	9.89	-	0.4	0.101	0.815
Adrenaline,noradrenaline inhibits insulin secretion (R-BTA-400042)	20	3	7.61	-	0.39	0.161	0.97
Growth hormone receptor signaling (R-BTA-982772)	21	3	7.99	-	0.38	0.113	0.804
O2/CO2 exchange in erythrocytes (R-BTA-1480926)	14	2	5.33	-	0.38	0.263	1.07
Golgi Cisternae Pericentriolar Stack Reorganization (R-BTA-162658)	7	1	2.66	-	0.38	0.459	1.09
RNA Polymerase I Promoter Opening (R-BTA-73728)	7	1	2.66	-	0.38	0.459	1.09
Advanced glycosylation endproduct receptor signaling (R-BTA-879415)	7	1	2.66	-	0.38	0.459	1.09
FGFR3b ligand binding and activation (R-BTA-190371)	7	1	2.66	-	0.38	0.459	1.09
HuR (ELAVL1) binds and stabilizes mRNA (R-BTA-450520)	7	1	2.66	-	0.38	0.459	1.08
Erythrocytes take up carbon dioxide and release oxygen (R-BTA-1237044)	14	2	5.33	-	0.38	0.263	1.06
Organic anion transporters (R-BTA-428643)	7	1	2.66	-	0.38	0.459	1.08
TRAIL signaling (R-BTA-75158)	7	1	2.66	-	0.38	0.459	1.08
ADP signalling through P2Y purinoceptor 12 (R-BTA-392170)	7	1	2.66	-	0.38	0.459	1.08
Chemokine receptors bind chemokines (R-BTA-380108)	52	7	19.78	-	0.35	0.00526	0.296
Synthesis of (16-20)-hydroxyeicosatetraenoic acids (HETE) (R-BTA-2142816)	15	2	5.71	-	0.35	0.181	1.01
Regulation of Hypoxia-inducible Factor (HIF) by oxygen (R-BTA-1234174)	23	3	8.75	-	0.34	0.0787	0.719
Cellular response to hypoxia (R-BTA-2262749)	23	3	8.75	-	0.34	0.0787	0.714
Thromboxane signalling through TP receptor (R-BTA-428930)	8	1	3.04	-	0.33	0.46	1.08
Hormone-sensitive lipase (HSL)-mediated triacylglycerol hydrolysis (R-BTA-163560)	8	1	3.04	-	0.33	0.46	1.08
Tryptophan catabolism (R-BTA-71240)	9	1	3.42	-	0.29	0.303	1.07
Androgen biosynthesis (R-BTA-193048)	9	1	3.42	-	0.29	0.303	1.06
Interleukin-19, 20, 22, 24 (R-BTA-8854691)	9	1	3.42	-	0.29	0.303	1.06
Glucocorticoid biosynthesis (R-BTA-194002)	9	1	3.42	-	0.29	0.303	1.06
YAP1- and WWTR1 (TAZ)-stimulated gene expression (R-BTA-2032785)	9	1	3.42	-	0.29	0.303	1.06
Transport of organic anions (R-BTA-879518)	9	1	3.42	-	0.29	0.303	1.05
Acyl chain remodelling of PI (R-BTA-1482922)	19	2	7.23	-	0.28	0.0847	0.741
Sema4D mediated inhibition of cell attachment and migration (R-BTA-416550)	10	1	3.8	-	0.26	0.309	1.03
Prolactin receptor signaling (R-BTA-1170546)	20	2	7.61	-	0.26	0.0565	0.603
Glycoprotein hormones (R-BTA-209822)	10	1	3.8	-	0.26	0.309	1.03
Erythrocytes take up oxygen and release carbon dioxide (R-BTA-1247673)	10	1	3.8	-	0.26	0.309	1.03
Olfactory Signaling Pathway (R-BTA-381753)	474	44	180.31	-	0.24	1.81e-27	2.65e-24
Fatty acids (R-BTA-211935)	11	1	4.18	-	0.24	0.199	1.03
Synthesis, secretion, and inactivation of Glucose-dependent Insulinotropic Polypeptide (GIP) (R-BTA-400511)	3	0	1.14	-	< 0.01	0.566	1.11
Incretin synthesis, secretion, and inactivation (R-BTA-400508)	9	0	3.42	-	< 0.01	0.0714	0.682
Activation of CaMK IV (R-BTA-442745)	2	0	0.76	-	< 0.01	1	1.21
Interconversion of polyamines (R-BTA-351200)	3	0	1.14	-	< 0.01	0.566	1.11
The proton buffering model (R-BTA-167827)	5	0	1.9	-	< 0.01	0.332	1.04
The fatty acid cycling model (R-BTA-167826)	5	0	1.9	-	< 0.01	0.332	1.04
Synthesis of Dolichyl-phosphate (R-BTA-446199)	6	0	2.28	-	< 0.01	0.197	1.03
Serotonin Neurotransmitter Release Cycle (R-BTA-181429)	1	0	0.38	-	< 0.01	1	1.13
Sterols are 12-hydroxylated by CYP8B1 (R-BTA-211994)	1	0	0.38	-	< 0.01	1	1.13
Release of apoptotic factors from the mitochondria (R-BTA-111457)	2	0	0.76	-	< 0.01	1	1.21
Activation and oligomerization of BAK protein (R-BTA-111452)	2	0	0.76	-	< 0.01	1	1.21
Activation of BIM and translocation to mitochondria (R-BTA-111446)	4	0	1.52	-	< 0.01	0.581	1.09
Synthesis of dolichyl-phosphate mannose (R-BTA-162699)	3	0	1.14	-	< 0.01	0.566	1.11
Oligomerization of connexins into connexons (R-BTA-190704)	1	0	0.38	-	< 0.01	1	1.13
Carnitine synthesis (R-BTA-71262)	2	0	0.76	-	< 0.01	1	1.21
Inositol transporters (R-BTA-429593)	2	0	0.76	-	< 0.01	1	1.21
Synthesis of PIPs at the ER membrane (R-BTA-1483248)	2	0	0.76	-	< 0.01	1	1.21
TWIK related potassium channel (TREK) (R-BTA-1299503)	3	0	1.14	-	< 0.01	0.566	1.1
Synthesis of PI (R-BTA-1483226)	2	0	0.76	-	< 0.01	1	1.2
GABA A (rho) receptor activation (R-BTA-977442)	2	0	0.76	-	< 0.01	1	1.2
Oxygen-dependent proline hydroxylation of Hypoxia-inducible Factor Alpha (R-BTA-1234176)	18	0	6.85	-	< 0.01	0.00594	0.31
Glycine degradation (R-BTA-6783984)	9	0	3.42	-	< 0.01	0.0714	0.678
Oxygen-dependent asparagine hydroxylation of Hypoxia-inducible Factor Alpha (R-BTA-1234162)	3	0	1.14	-	< 0.01	0.566	1.1
Acrosome Reaction (R-BTA-1300645)	1	0	0.38	-	< 0.01	1	1.13
Synthesis, secretion, and inactivation of Glucagon-like Peptide-1 (GLP-1) (R-BTA-381771)	9	0	3.42	-	< 0.01	0.0714	0.673
Transfer of LPS from LBP carrier to CD14 (R-BTA-166020)	2	0	0.76	-	< 0.01	1	1.2
PAOs oxidise polyamines to amines (R-BTA-141334)	2	0	0.76	-	< 0.01	1	1.2
Opsins (R-BTA-419771)	4	0	1.52	-	< 0.01	0.581	1.09
Synthesis of IPs in the ER lumen (R-BTA-1855231)	1	0	0.38	-	< 0.01	1	1.13
FGFR1c and Klotho ligand binding and activation (R-BTA-190374)	3	0	1.14	-	< 0.01	0.566	1.1
Mineralocorticoid biosynthesis (R-BTA-193993)	7	0	2.66	-	< 0.01	0.201	1.03
Transcriptional activation of p53 responsive genes (R-BTA-69560)	2	0	0.76	-	< 0.01	1	1.2
Protein repair (R-BTA-5676934)	5	0	1.9	-	< 0.01	0.332	1.03
Proton-coupled monocarboxylate transport (R-BTA-433692)	5	0	1.9	-	< 0.01	0.332	1.03
Proton/oligopeptide cotransporters (R-BTA-427975)	4	0	1.52	-	< 0.01	0.581	1.09
Transcriptional regulation of pluripotent stem cells (R-BTA-452723)	4	0	1.52	-	< 0.01	0.581	1.09
Transcriptional activation of cell cycle inhibitor p21 (R-BTA-69895)	2	0	0.76	-	< 0.01	1	1.2
Acetylation (R-BTA-156582)	1	0	0.38	-	< 0.01	1	1.13
PKA-mediated phosphorylation of key metabolic factors (R-BTA-163358)	1	0	0.38	-	< 0.01	1	1.13
Mitochondrial tRNA aminoacylation (R-BTA-379726)	1	0	0.38	-	< 0.01	1	1.13
tRNA Aminoacylation (R-BTA-379724)	2	0	0.76	-	< 0.01	1	1.2
Cytosolic tRNA aminoacylation (R-BTA-379716)	1	0	0.38	-	< 0.01	1	1.13
AMPK inhibits chREBP transcriptional activation activity (R-BTA-163680)	6	0	2.28	-	< 0.01	0.197	1.02
Mitochondrial transcription termination (R-BTA-163316)	1	0	0.38	-	< 0.01	1	1.13
PI and PC transport between ER and Golgi membranes (R-BTA-1483196)	1	0	0.38	-	< 0.01	1	1.12
Metabolism of vitamin K (R-BTA-6806664)	2	0	0.76	-	< 0.01	1	1.2
ATF6-alpha activates chaperones (R-BTA-381033)	3	0	1.14	-	< 0.01	0.566	1.1
Synthesis of PG (R-BTA-1483148)	1	0	0.38	-	< 0.01	1	1.12
TFAP2 (AP-2) family regulates transcription of growth factors and their receptors (R-BTA-8866910)	2	0	0.76	-	< 0.01	1	1.2
Response to metal ions (R-BTA-5660526)	1	0	0.38	-	< 0.01	1	1.12
Glycerophospholipid catabolism (R-BTA-6814848)	3	0	1.14	-	< 0.01	0.566	1.1
Activation of BMF and translocation to mitochondria (R-BTA-139910)	3	0	1.14	-	< 0.01	0.566	1.1
Synthesis of IPs in the nucleus (R-BTA-1855191)	4	0	1.52	-	< 0.01	0.581	1.09
Synthesis of PS (R-BTA-1483101)	1	0	0.38	-	< 0.01	1	1.12
Regulation of TP53 Expression (R-BTA-6804754)	1	0	0.38	-	< 0.01	1	1.12
Dopamine receptors (R-BTA-390651)	2	0	0.76	-	< 0.01	1	1.2
CaMK IV-mediated phosphorylation of CREB (R-BTA-111932)	2	0	0.76	-	< 0.01	1	1.19
Muscarinic acetylcholine receptors (R-BTA-390648)	4	0	1.52	-	< 0.01	0.581	1.09
Pyrophosphate hydrolysis (R-BTA-71737)	2	0	0.76	-	< 0.01	1	1.19
FasL/ CD95L signaling (R-BTA-75157)	4	0	1.52	-	< 0.01	0.581	1.08
Unwinding of DNA (R-BTA-176974)	4	0	1.52	-	< 0.01	0.581	1.08
Synthesis of Hepoxilins (HX) and Trioxilins (TrX) (R-BTA-2142696)	1	0	0.38	-	< 0.01	1	1.12
CD22 mediated BCR regulation (R-BTA-5690714)	1	0	0.38	-	< 0.01	1	1.12
Transport of connexons to the plasma membrane (R-BTA-190872)	2	0	0.76	-	< 0.01	1	1.19
Metallothioneins bind metals (R-BTA-5661231)	1	0	0.38	-	< 0.01	1	1.12
Gap junction assembly (R-BTA-190861)	4	0	1.52	-	< 0.01	0.581	1.08
Classical antibody-mediated complement activation (R-BTA-173623)	7	0	2.66	-	< 0.01	0.201	1.03
Microtubule-dependent trafficking of connexons from Golgi to the plasma membrane (R-BTA-190840)	1	0	0.38	-	< 0.01	1	1.12
Sulfide oxidation to sulfate (R-BTA-1614517)	3	0	1.14	-	< 0.01	0.566	1.09
Regulation of thyroid hormone activity (R-BTA-350864)	1	0	0.38	-	< 0.01	1	1.12
Defensins (R-BTA-1461973)	5	0	1.9	-	< 0.01	0.332	1.03
TWIK-releated acid-sensitive K+ channel (TASK) (R-BTA-1299316)	2	0	0.76	-	< 0.01	1	1.19
Tandem of pore domain in a weak inwardly rectifying K+ channels (TWIK) (R-BTA-1299308)	3	0	1.14	-	< 0.01	0.566	1.09
Beta defensins (R-BTA-1461957)	5	0	1.9	-	< 0.01	0.332	1.03
TP53 Regulates Transcription of Death Receptors and Ligands (R-BTA-6803211)	2	0	0.76	-	< 0.01	1	1.19
GABA synthesis (R-BTA-888568)	2	0	0.76	-	< 0.01	1	1.19
5-Phosphoribose 1-diphosphate biosynthesis (R-BTA-73843)	1	0	0.38	-	< 0.01	1	1.12
Mitochondrial Uncoupling Proteins (R-BTA-166187)	5	0	1.9	-	< 0.01	0.332	1.03
NFG and proNGF binds to p75NTR (R-BTA-205017)	2	0	0.76	-	< 0.01	1	1.19
Proton-coupled neutral amino acid transporters (R-BTA-428559)	2	0	0.76	-	< 0.01	1	1.19
NoRC negatively regulates rRNA expression (R-BTA-427413)	5	0	1.9	-	< 0.01	0.332	1.02
Transport of glycerol from adipocytes to the liver by Aquaporins (R-BTA-432030)	2	0	0.76	-	< 0.01	1	1.19

## Sheet: Pathways
Analysis Type:	PANTHER Overrepresentation Test (Released 20171205)
Annotation Version and Release Date:	PANTHER version 13.1 Released 2018-02-03
Analyzed List:	Client Text Box Input (Bos taurus)	There are duplicate IDs in the file. The unique set of IDs will be used.
Reference List:	Bos taurus (all genes in database)
Test Type:	FISHER
PANTHER Pathways	Bos taurus - REFLIST (21987)	Client Text Box Input (8364)	Client Text Box Input (expected)	Client Text Box Input (over/under)	Client Text Box Input (fold Enrichment)	Client Text Box Input (raw P-value)	Client Text Box Input (FDR)
Triacylglycerol metabolism (P02782)	4	4	1.52	+	2.63	0.228	0.729
Bupropion degradation (P05729)	1	1	0.38	+	2.63	0.475	0.993
Anandamide degradation (P05728)	1	1	0.38	+	2.63	0.475	0.981
Lysine biosynthesis (P02751)	1	1	0.38	+	2.63	0.475	0.968
Cysteine biosynthesis (P02737)	1	1	0.38	+	2.63	0.475	0.956
Histamine synthesis (P04387)	1	1	0.38	+	2.63	0.475	0.945
Aminobutyrate degradation (P02726)	4	4	1.52	+	2.63	0.228	0.715
Allantoin degradation (P02725)	1	1	0.38	+	2.63	0.475	0.933
Acetate utilization (P02722)	4	4	1.52	+	2.63	0.228	0.701
Salvage pyrimidine deoxyribonucleotides (P02774)	3	3	1.14	+	2.63	0.356	0.922
Methylcitrate cycle (P02754)	7	7	2.66	+	2.63	0.0732	0.477
Glutamine glutamate conversion (P02745)	4	3	1.52	+	1.97	0.403	0.925
Cholesterol biosynthesis (P00014)	15	11	5.71	+	1.93	0.121	0.565
Formyltetrahydroformate biosynthesis (P02743)	11	8	4.18	+	1.91	0.196	0.681
Pyruvate metabolism (P02772)	13	9	4.95	+	1.82	0.16	0.667
Fructose galactose metabolism (P02744)	13	9	4.95	+	1.82	0.16	0.65
MYO signaling pathway (P06215)	6	4	2.28	+	1.75	0.478	0.916
Methionine biosynthesis (P02753)	3	2	1.14	+	1.75	0.621	0.928
Tetrahydrofolate biosynthesis (P02742)	6	4	2.28	+	1.75	0.478	0.906
Purine metabolism (P02769)	11	7	4.18	+	1.67	0.295	0.829
TCA cycle (P00051)	11	7	4.18	+	1.67	0.295	0.815
Endothelin signaling pathway (P00019)	92	58	35	+	1.66	0.00324	0.105
GBB signaling pathway (P06214)	8	5	3.04	+	1.64	0.364	0.928
Axon guidance mediated by netrin (P00009)	36	22	13.69	+	1.61	0.0791	0.496
Plasminogen activating cascade (P00050)	23	14	8.75	+	1.6	0.196	0.694
Insulin/IGF pathway-protein kinase B signaling cascade (P00033)	45	27	17.12	+	1.58	0.0646	0.478
Insulin/IGF pathway-mitogen activated protein kinase kinase/MAP kinase cascade (P00032)	40	24	15.22	+	1.58	0.0917	0.515
De novo purine biosynthesis (P02738)	37	22	14.08	+	1.56	0.108	0.55
p53 pathway (P00059)	95	56	36.14	+	1.55	0.0104	0.17
Alpha adrenergic receptor signaling pathway (P00002)	31	18	11.79	+	1.53	0.152	0.67
Metabotropic glutamate receptor group I pathway (P00041)	26	15	9.89	+	1.52	0.22	0.718
Ionotropic glutamate receptor pathway (P00037)	54	31	20.54	+	1.51	0.0689	0.488
Integrin signalling pathway (P00034)	204	117	77.6	+	1.51	0.000529	0.0431
VEGF signaling pathway (P00056)	77	44	29.29	+	1.5	0.0324	0.278
JAK/STAT signaling pathway (P00038)	21	12	7.99	+	1.5	0.248	0.749
Activin beta signaling pathway (P06210)	7	4	2.66	+	1.5	0.509	0.921
2-arachidonoylglycerol biosynthesis (P05726)	7	4	2.66	+	1.5	0.509	0.911
PDGF signaling pathway (P00047)	158	90	60.1	+	1.5	0.00266	0.108
p53 pathway feedback loops 2 (P04398)	55	31	20.92	+	1.48	0.09	0.543
Angiogenesis (P00005)	190	107	72.28	+	1.48	0.00135	0.0736
Salvage pyrimidine ribonucleotides (P02775)	16	9	6.09	+	1.48	0.371	0.903
Pyrimidine Metabolism (P02771)	16	9	6.09	+	1.48	0.371	0.89
Hypoxia response via HIF activation (P00030)	34	19	12.93	+	1.47	0.217	0.722
SCW signaling pathway (P06216)	9	5	3.42	+	1.46	0.55	0.925
DPP-SCW signaling pathway (P06212)	9	5	3.42	+	1.46	0.55	0.916
Pentose phosphate pathway (P02762)	9	5	3.42	+	1.46	0.55	0.906
De novo pyrimidine deoxyribonucleotide biosynthesis (P02739)	18	10	6.85	+	1.46	0.396	0.936
Gamma-aminobutyric acid synthesis (P04384)	9	5	3.42	+	1.46	0.55	0.897
Cadherin signaling pathway (P00012)	148	82	56.3	+	1.46	0.00751	0.153
Nicotinic acetylcholine receptor signaling pathway (P00044)	110	60	41.84	+	1.43	0.0254	0.258
Alzheimer disease-presenilin pathway (P00004)	146	79	55.54	+	1.42	0.0133	0.18
Histamine H1 receptor mediated signaling pathway (P04385)	50	27	19.02	+	1.42	0.159	0.684
Glycolysis (P00024)	26	14	9.89	+	1.42	0.291	0.833
FGF signaling pathway (P00021)	138	73	52.5	+	1.39	0.0248	0.269
Cytoskeletal regulation by Rho GTPase (P00016)	91	48	34.62	+	1.39	0.0706	0.479
EGF receptor signaling pathway (P00018)	156	81	59.34	+	1.36	0.0237	0.276
Blood coagulation (P00011)	58	30	22.06	+	1.36	0.188	0.731
PI3 kinase pathway (P00048)	60	31	22.82	+	1.36	0.195	0.708
DPP signaling pathway (P06213)	10	5	3.8	+	1.31	0.574	0.9
Threonine biosynthesis (P02781)	2	1	0.76	+	1.31	1	1.04
ALP23B signaling pathway (P06209)	8	4	3.04	+	1.31	0.747	0.982
Pyridoxal phosphate salvage pathway (P02770)	2	1	0.76	+	1.31	1	1.03
Lipoate_biosynthesis (P02750)	2	1	0.76	+	1.31	1	1.03
Thyrotropin-releasing hormone receptor signaling pathway (P04394)	70	35	26.63	+	1.31	0.19	0.719
Oxytocin receptor mediated signaling pathway (P04391)	66	33	25.11	+	1.31	0.215	0.73
Asparagine and aspartate biosynthesis (P02730)	4	2	1.52	+	1.31	0.67	0.967
General transcription by RNA polymerase I (P00022)	18	9	6.85	+	1.31	0.52	0.911
Circadian clock system (P00015)	10	5	3.8	+	1.31	0.574	0.891
Succinate to proprionate conversion (P02777)	6	3	2.28	+	1.31	0.714	0.986
FAS signaling pathway (P00020)	37	18	14.08	+	1.28	0.369	0.912
Wnt signaling pathway (P00057)	320	155	121.73	+	1.27	0.0149	0.187
CCKR signaling map (P06959)	203	98	77.22	+	1.27	0.0598	0.464
Huntington disease (P00029)	160	77	60.87	+	1.27	0.0932	0.506
De novo pyrimidine ribonucleotides biosythesis (P02740)	19	9	7.23	+	1.25	0.672	0.961
5HT2 type receptor mediated signaling pathway (P04374)	76	36	28.91	+	1.25	0.29	0.843
Interferon-gamma signaling pathway (P00035)	34	16	12.93	+	1.24	0.526	0.912
Apoptosis signaling pathway (P00006)	130	61	49.45	+	1.23	0.193	0.716
DNA replication (P00017)	32	15	12.17	+	1.23	0.515	0.912
Inflammation mediated by chemokine and cytokine signaling pathway (P00031)	269	126	102.33	+	1.23	0.054	0.44
Adenine and hypoxanthine salvage pathway (P02723)	13	6	4.95	+	1.21	0.797	1.02
p38 MAPK pathway (P05918)	44	20	16.74	+	1.19	0.487	0.912
Heterotrimeric G-protein signaling pathway-Gq alpha and Go alpha mediated pathway (P00027)	136	61	51.74	+	1.18	0.298	0.81
Mannose metabolism (P02752)	9	4	3.42	+	1.17	0.762	0.985
Muscarinic acetylcholine receptor 1 and 3 signaling pathway (P00042)	70	31	26.63	+	1.16	0.503	0.922
Toll receptor signaling pathway (P00054)	68	30	25.87	+	1.16	0.498	0.922
Interleukin signaling pathway (P00036)	100	44	38.04	+	1.16	0.454	0.988
TGF-beta signaling pathway (P00052)	110	48	41.84	+	1.15	0.423	0.957
p53 pathway by glucose deprivation (P04397)	23	10	8.75	+	1.14	0.7	0.975
Gonadotropin-releasing hormone receptor pathway (P06664)	276	119	104.99	+	1.13	0.257	0.762
Nicotine pharmacodynamics pathway (P06587)	42	18	15.98	+	1.13	0.666	0.978
Xanthine and guanine salvage pathway (P02788)	7	3	2.66	+	1.13	1	1.01
Coenzyme A biosynthesis (P02736)	7	3	2.66	+	1.13	1	1
Hedgehog signaling pathway (P00025)	28	12	10.65	+	1.13	0.725	0.976
Cell cycle (P00013)	28	12	10.65	+	1.13	0.725	0.968
Ras Pathway (P04393)	78	33	29.67	+	1.11	0.596	0.908
BMP/activin signaling pathway-drosophila (P06211)	12	5	4.56	+	1.1	0.792	1.02
Parkinson disease (P00049)	130	54	49.45	+	1.09	0.62	0.935
Metabotropic glutamate receptor group III pathway (P00039)	71	29	27.01	+	1.07	0.737	0.977
5-Hydroxytryptamine degredation (P04372)	27	11	10.27	+	1.07	0.856	1.06
Alzheimer disease-amyloid secretase pathway (P00003)	79	32	30.05	+	1.06	0.75	0.978
S-adenosylmethionine biosynthesis (P02773)	5	2	1.9	+	1.05	1	1.11
Ornithine degradation (P02758)	5	2	1.9	+	1.05	1	1.1
ATP synthesis (P02721)	10	4	3.8	+	1.05	1	1.07
General transcription regulation (P00023)	45	18	17.12	+	1.05	0.888	1.07
Synaptic vesicle trafficking (P05734)	33	13	12.55	+	1.04	0.87	1.07
Notch signaling pathway (P00045)	45	17	17.12	-	0.99	1	1.12
Heme biosynthesis (P02746)	16	6	6.09	-	0.99	1	1.09
Arginine biosynthesis (P02728)	8	3	3.04	-	0.99	1	1.08
Unclassified (UNCLASSIFIED)	19068	7043	7253.59	-	0.97	2.17e-08	3.53e-06
B cell activation (P00010)	77	28	29.29	-	0.96	0.913	1.09
Ubiquitin proteasome pathway (P00060)	72	26	27.39	-	0.95	0.91	1.09
Heterotrimeric G-protein signaling pathway-Gi alpha and Gs alpha mediated pathway (P00026)	179	64	68.09	-	0.94	0.719	0.976
Androgen/estrogene/progesterone biosynthesis (P02727)	14	5	5.33	-	0.94	1	1.18
Dopamine receptor mediated signaling pathway (P05912)	68	24	25.87	-	0.93	0.816	1.02
T cell activation (P00053)	114	40	43.37	-	0.92	0.718	0.983
GABA-B receptor II signaling (P05731)	40	14	15.22	-	0.92	0.88	1.07
Axon guidance mediated by Slit/Robo (P00008)	26	9	9.89	-	0.91	1	1.04
Transcription regulation by bZIP transcription factor (P00055)	69	23	26.25	-	0.88	0.641	0.95
Thiamin metabolism (P02780)	3	1	1.14	-	0.88	1	1.02
Beta2 adrenergic receptor signaling pathway (P04378)	47	15	17.88	-	0.84	0.67	0.975
Axon guidance mediated by semaphorins (P00007)	22	7	8.37	-	0.84	0.836	1.04
Vitamin D metabolism and pathway (P04396)	16	5	6.09	-	0.82	0.811	1.03
5HT3 type receptor mediated signaling pathway (P04375)	23	7	8.75	-	0.8	0.687	0.966
Angiotensin II-stimulated signaling through G proteins and beta-arrestin (P05911)	43	13	16.36	-	0.79	0.55	0.935
Beta1 adrenergic receptor signaling pathway (P04377)	48	14	18.26	-	0.77	0.477	0.925
Oxidative stress response (P00046)	59	17	22.44	-	0.76	0.369	0.924
Adrenaline and noradrenaline biosynthesis (P00001)	42	12	15.98	-	0.75	0.447	0.986
Serine glycine biosynthesis (P02776)	7	2	2.66	-	0.75	1	1.01
Metabotropic glutamate receptor group II pathway (P00040)	50	14	19.02	-	0.74	0.4	0.932
Vitamin B6 metabolism (P02787)	4	1	1.52	-	0.66	1	1.07
Flavin biosynthesis (P02741)	4	1	1.52	-	0.66	1	1.06
5-Hydroxytryptamine biosynthesis (P04371)	4	1	1.52	-	0.66	1	1.05
Muscarinic acetylcholine receptor 2 and 4 signaling pathway (P00043)	67	16	25.49	-	0.63	0.109	0.539
Endogenous cannabinoid signaling (P05730)	26	6	9.89	-	0.61	0.325	0.869
Cortocotropin releasing factor receptor signaling pathway (P04380)	34	7	12.93	-	0.54	0.162	0.644
Proline biosynthesis (P02768)	5	1	1.9	-	0.53	1	1.13
O-antigen biosynthesis (P02757)	5	1	1.9	-	0.53	1	1.12
mRNA splicing (P00058)	10	2	3.8	-	0.53	0.53	0.91
Vasopressin synthesis (P04395)	15	3	5.71	-	0.53	0.431	0.961
5HT4 type receptor mediated signaling pathway (P04376)	38	7	14.46	-	0.48	0.0932	0.49
Methylmalonyl pathway (P02755)	6	1	2.28	-	0.44	0.682	0.966
Beta3 adrenergic receptor signaling pathway (P04379)	31	5	11.79	-	0.42	0.0907	0.528
Histamine H2 receptor mediated signaling pathway (P04386)	25	4	9.51	-	0.42	0.143	0.647
Heterotrimeric G-protein signaling pathway-rod outer segment phototransduction (P00028)	39	6	14.84	-	0.4	0.0303	0.291
Opioid proopiomelanocortin pathway (P05917)	40	6	15.22	-	0.39	0.0305	0.276
N-acetylglucosamine metabolism (P02756)	7	1	2.66	-	0.38	0.459	0.984
5HT1 type receptor mediated signaling pathway (P04373)	51	7	19.4	-	0.36	0.00746	0.174
Opioid proenkephalin pathway (P05915)	40	5	15.22	-	0.33	0.0116	0.172
P53 pathway feedback loops 1 (P04392)	8	1	3.04	-	0.33	0.46	0.973
Enkephalin release (P05913)	38	4	14.46	-	0.28	0.00845	0.153
Opioid prodynorphin pathway (P05916)	39	4	14.84	-	0.27	0.00564	0.153
Toll pathway-drosophila (P06217)	2	0	0.76	-	< 0.01	1	1.17
Valine biosynthesis (P02785)	4	0	1.52	-	< 0.01	0.581	0.893
Tyrosine biosynthesis (P02784)	1	0	0.38	-	< 0.01	1	1.09
Sulfate assimilation (P02778)	3	0	1.14	-	< 0.01	0.566	0.914
Phenylethylamine degradation (P02766)	8	0	3.04	-	< 0.01	0.117	0.56
Nicotine degradation (P05914)	3	0	1.14	-	< 0.01	0.566	0.905
Pyridoxal-5-phosphate biosynthesis (P02759)	2	0	0.76	-	< 0.01	1	1.16
Leucine biosynthesis (P02749)	2	0	0.76	-	< 0.01	1	1.16
Isoleucine biosynthesis (P02748)	5	0	1.9	-	< 0.01	0.332	0.872
Histidine biosynthesis (P02747)	3	0	1.14	-	< 0.01	0.566	0.896
Ascorbate degradation (P02729)	2	0	0.76	-	< 0.01	1	1.15
Alanine biosynthesis (P02724)	2	0	0.76	-	< 0.01	1	1.14

## Sheet: Protein Class
Analysis Type:	PANTHER Overrepresentation Test (Released 20171205)
Annotation Version and Release Date:	PANTHER version 13.1 Released 2018-02-03
Analyzed List:	Client Text Box Input (Bos taurus)	There are duplicate IDs in the file. The unique set of IDs will be used.
Reference List:	Bos taurus (all genes in database)
Test Type:	FISHER
PANTHER Protein Class	Bos taurus - REFLIST (21987)	Client Text Box Input (8364)	Client Text Box Input (expected)	Client Text Box Input (over/under)	Client Text Box Input (fold Enrichment)	Client Text Box Input (raw P-value)	Client Text Box Input (FDR)
microtubule binding motor protein (PC00156)	62	50	23.59	+	2.12	0.000114	0.00223
guanyl-nucleotide exchange factor (PC00113)	82	55	31.19	+	1.76	0.00147	0.0211
annexin (PC00050)	108	66	41.08	+	1.61	0.00283	0.0357
G-protein modulator (PC00022)	281	171	106.89	+	1.6	2.11e-06	9.07e-05
non-receptor serine/threonine protein kinase (PC00167)	223	135	84.83	+	1.59	2.88e-05	0.000773
protein kinase (PC00193)	278	165	105.75	+	1.56	8.11e-06	0.000291
kinase (PC00137)	391	228	148.74	+	1.53	4.12e-07	2.95e-05
ligase (PC00142)	282	154	107.27	+	1.44	0.000357	0.0059
cysteine protease (PC00081)	219	119	83.31	+	1.43	0.00215	0.0289
cytoskeletal protein (PC00085)	535	266	203.52	+	1.31	0.000357	0.00549
transferase (PC00220)	971	473	369.37	+	1.28	8.94e-06	0.000275
hydrolase (PC00121)	1552	701	590.39	+	1.19	0.000107	0.0023
Unclassified (UNCLASSIFIED)	12790	4612	4865.4	-	0.95	1.99e-06	0.000107
defense/immunity protein (PC00090)	326	62	124.01	-	0.5	8.56e-08	1.84e-05
immunoglobulin receptor superfamily (PC00124)	85	11	32.33	-	0.34	0.000208	0.00373
histone (PC00118)	127	14	48.31	-	0.29	3.67e-07	3.95e-05
immunoglobulin (PC00123)	31	0	11.79	-	< 0.01	6.45e-05	0.00154
helicase (PC00115)	2	2	0.76	+	2.63	0.306	0.62
DNA polymerase processivity factor (PC00015)	1	1	0.38	+	2.63	0.475	0.792
DNA ligase (PC00012)	2	2	0.76	+	2.63	0.306	0.614
reverse transcriptase (PC00200)	2	2	0.76	+	2.63	0.306	0.608
intermediate filament binding protein (PC00130)	15	13	5.71	+	2.28	0.0332	0.188
intermediate filament (PC00129)	15	13	5.71	+	2.28	0.0332	0.183
exodeoxyribonuclease (PC00098)	7	6	2.66	+	2.25	0.209	0.535
interleukin superfamily (PC00128)	6	5	2.28	+	2.19	0.189	0.513
microtubule binding motor protein (PC00156)	62	50	23.59	+	2.12	0.000114	0.00223
viral protein (PC00237)	5	4	1.9	+	2.1	0.272	0.628
hydratase (PC00120)	18	14	6.85	+	2.04	0.0477	0.233
guanylate cyclase (PC00114)	9	7	3.42	+	2.04	0.164	0.475
adenylate cyclase (PC00043)	9	7	3.42	+	2.04	0.164	0.469
replication origin binding protein (PC00199)	9	7	3.42	+	2.04	0.164	0.463
extracellular matrix linker protein (PC00101)	25	19	9.51	+	2	0.0271	0.171
carbohydrate phosphatase (PC00066)	8	6	3.04	+	1.97	0.231	0.559
transketolase (PC00221)	4	3	1.52	+	1.97	0.403	0.716
translation release factor (PC00225)	7	5	2.66	+	1.88	0.331	0.635
DNA helicase (PC00011)	46	32	17.5	+	1.83	0.0107	0.0998
cyclase (PC00079)	13	9	4.95	+	1.82	0.16	0.476
RNA helicase (PC00032)	39	27	14.84	+	1.82	0.0187	0.161
nucleotide kinase (PC00172)	48	33	18.26	+	1.81	0.0121	0.108
guanyl-nucleotide exchange factor (PC00113)	82	55	31.19	+	1.76	0.00147	0.0211
aminoacyl-tRNA synthetase (PC00047)	30	20	11.41	+	1.75	0.0569	0.272
ionotropic glutamate receptor (PC00134)	6	4	2.28	+	1.75	0.478	0.79
Runt transcription factor (PC00254)	3	2	1.14	+	1.75	0.621	0.901
damaged DNA-binding protein (PC00086)	21	13	7.99	+	1.63	0.179	0.494
cadherin (PC00057)	13	8	4.95	+	1.62	0.327	0.64
annexin (PC00050)	108	66	41.08	+	1.61	0.00283	0.0357
G-protein modulator (PC00022)	281	171	106.89	+	1.6	2.11e-06	9.07e-05
non-receptor serine/threonine protein kinase (PC00167)	223	135	84.83	+	1.59	2.88e-05	0.000773
surfactant (PC00212)	10	6	3.8	+	1.58	0.403	0.71
non-receptor tyrosine protein kinase (PC00168)	37	22	14.08	+	1.56	0.108	0.393
protein kinase (PC00193)	278	165	105.75	+	1.56	8.11e-06	0.000291
endodeoxyribonuclease (PC00093)	17	10	6.47	+	1.55	0.283	0.628
deacetylase (PC00087)	17	10	6.47	+	1.55	0.283	0.622
chaperonin (PC00073)	17	10	6.47	+	1.55	0.283	0.615
calcium channel (PC00058)	24	14	9.13	+	1.53	0.206	0.539
voltage-gated calcium channel (PC00240)	24	14	9.13	+	1.53	0.206	0.533
kinase (PC00137)	391	228	148.74	+	1.53	4.12e-07	2.95e-05
ribonucleoprotein (PC00201)	52	30	19.78	+	1.52	0.0822	0.315
ATP-binding cassette (ABC) transporter (PC00003)	51	29	19.4	+	1.49	0.102	0.379
translation elongation factor (PC00222)	37	21	14.08	+	1.49	0.143	0.445
translation factor (PC00223)	91	51	34.62	+	1.47	0.0301	0.179
mRNA polyadenylation factor (PC00146)	18	10	6.85	+	1.46	0.396	0.71
ligase (PC00142)	282	154	107.27	+	1.44	0.000357	0.0059
cysteine protease (PC00081)	219	119	83.31	+	1.43	0.00215	0.0289
epimerase/racemase (PC00096)	35	19	13.31	+	1.43	0.223	0.557
complement component (PC00078)	13	7	4.95	+	1.42	0.457	0.774
membrane trafficking regulatory protein (PC00151)	92	49	35	+	1.4	0.059	0.276
oxygenase (PC00177)	81	43	30.81	+	1.4	0.0864	0.326
translation initiation factor (PC00224)	72	38	27.39	+	1.39	0.109	0.389
non-motor actin binding protein (PC00165)	104	54	39.56	+	1.36	0.0737	0.299
microtubule family cytoskeletal protein (PC00157)	212	110	80.65	+	1.36	0.01	0.0978
exoribonuclease (PC00099)	27	14	10.27	+	1.36	0.382	0.695
actin binding motor protein (PC00040)	31	16	11.79	+	1.36	0.328	0.636
acetyltransferase (PC00038)	74	38	28.15	+	1.35	0.138	0.45
actin family cytoskeletal protein (PC00041)	244	124	92.82	+	1.34	0.0097	0.0993
extracellular matrix protein (PC00102)	211	106	80.27	+	1.32	0.0227	0.163
kinase inhibitor (PC00139)	34	17	12.93	+	1.31	0.35	0.654
galactosidase (PC00104)	8	4	3.04	+	1.31	0.747	0.998
Lambda repressor-like transcription factor (PC00245)	2	1	0.76	+	1.31	1	1.05
anion channel (PC00049)	22	11	8.37	+	1.31	0.441	0.752
aldolase (PC00044)	2	1	0.76	+	1.31	1	1.05
DNA photolyase (PC00014)	2	1	0.76	+	1.31	1	1.04
nuclease (PC00170)	142	71	54.02	+	1.31	0.0645	0.283
neurotrophic factor (PC00163)	8	4	3.04	+	1.31	0.747	0.991
P53-like transcription factor (PC00253)	6	3	2.28	+	1.31	0.714	0.977
voltage-gated sodium channel (PC00243)	26	13	9.89	+	1.31	0.473	0.794
RNA methyltransferase (PC00033)	12	6	4.56	+	1.31	0.6	0.884
cytoskeletal protein (PC00085)	535	266	203.52	+	1.31	0.000357	0.00549
ion channel (PC00133)	226	112	85.97	+	1.3	0.0234	0.162
dehydrogenase (PC00092)	222	110	84.45	+	1.3	0.026	0.175
ligand-gated ion channel (PC00141)	85	42	32.33	+	1.3	0.164	0.459
mRNA processing factor (PC00147)	162	80	61.63	+	1.3	0.0602	0.275
lyase (PC00144)	121	59	46.03	+	1.28	0.132	0.442
transferase (PC00220)	971	473	369.37	+	1.28	8.94e-06	0.000275
extracellular matrix glycoprotein (PC00100)	113	55	42.99	+	1.28	0.141	0.452
transmembrane receptor regulatory/adaptor protein (PC00226)	72	35	27.39	+	1.28	0.234	0.559
non-motor microtubule binding protein (PC00166)	70	34	26.63	+	1.28	0.271	0.634
metalloprotease (PC00153)	229	111	87.11	+	1.27	0.0379	0.199
deaminase (PC00088)	31	15	11.79	+	1.27	0.509	0.804
mRNA splicing factor (PC00148)	118	57	44.89	+	1.27	0.149	0.457
intracellular calcium-sensing protein (PC00131)	176	85	66.95	+	1.27	0.0707	0.298
calmodulin (PC00061)	176	85	66.95	+	1.27	0.0707	0.292
kinase modulator (PC00140)	140	67	53.26	+	1.26	0.138	0.455
esterase (PC00097)	44	21	16.74	+	1.25	0.405	0.708
calcium-binding protein (PC00060)	254	121	96.62	+	1.25	0.0419	0.214
glycosyltransferase (PC00111)	147	70	55.92	+	1.25	0.127	0.434
SNARE protein (PC00034)	34	16	12.93	+	1.24	0.526	0.808
voltage-gated ion channel (PC00241)	30	14	11.41	+	1.23	0.504	0.808
transcription cofactor (PC00217)	168	78	63.91	+	1.22	0.152	0.46
protein phosphatase (PC00195)	67	31	25.49	+	1.22	0.366	0.679
endoribonuclease (PC00094)	26	12	9.89	+	1.21	0.587	0.871
ubiquitin-protein ligase (PC00234)	109	50	41.46	+	1.21	0.286	0.614
chromatin/chromatin-binding protein (PC00077)	130	59	49.45	+	1.19	0.254	0.6
hydrolase (PC00121)	1552	701	590.39	+	1.19	0.000107	0.0023
oxidase (PC00175)	131	59	49.83	+	1.18	0.29	0.617
membrane traffic protein (PC00150)	288	129	109.56	+	1.18	0.122	0.425
phosphatase (PC00181)	193	86	73.42	+	1.17	0.226	0.552
kinase activator (PC00138)	63	28	23.97	+	1.17	0.482	0.786
protease (PC00190)	890	387	338.56	+	1.14	0.0272	0.167
acyltransferase (PC00042)	114	49	43.37	+	1.13	0.482	0.791
RNA binding protein (PC00031)	761	327	289.49	+	1.13	0.0621	0.278
C4 zinc finger nuclear receptor (PC00169)	49	21	18.64	+	1.13	0.688	0.954
glucosidase (PC00108)	7	3	2.66	+	1.13	1	1.02
carbohydrate kinase (PC00065)	28	12	10.65	+	1.13	0.725	0.986
actin and actin related protein (PC00039)	35	15	13.31	+	1.13	0.751	0.991
protein kinase receptor (PC00194)	7	3	2.66	+	1.13	1	1.02
Hsp90 family chaperone (PC00028)	7	3	2.66	+	1.13	1	1.01
immunoglobulin fold transcription factor (PC00251)	31	13	11.79	+	1.1	0.738	0.998
chaperone (PC00072)	136	57	51.74	+	1.1	0.519	0.809
enzyme modulator (PC00095)	1202	503	457.25	+	1.1	0.0656	0.282
DNA-directed DNA polymerase (PC00018)	24	10	9.13	+	1.1	0.848	1.03
nucleic acid binding (PC00171)	1794	746	682.45	+	1.09	0.0348	0.187
oxidoreductase (PC00176)	517	214	196.67	+	1.09	0.295	0.622
structural protein (PC00211)	80	33	30.43	+	1.08	0.674	0.948
decarboxylase (PC00089)	22	9	8.37	+	1.08	0.842	1.05
peroxidase (PC00180)	22	9	8.37	+	1.08	0.842	1.04
ATP synthase (PC00002)	37	15	14.08	+	1.07	0.877	1.04
zinc finger transcription factor (PC00244)	346	140	131.62	+	1.06	0.539	0.811
transcription factor (PC00218)	1093	438	415.78	+	1.05	0.348	0.656
isomerase (PC00135)	110	44	41.84	+	1.05	0.786	1.01
TATA-binding transcription factor (PC00255)	5	2	1.9	+	1.05	1	1.11
Rel homology transcription factor (PC00252)	25	10	9.51	+	1.05	0.852	1.03
tyrosine protein kinase receptor (PC00233)	5	2	1.9	+	1.05	1	1.1
phosphodiesterase (PC00185)	10	4	3.8	+	1.05	1	1.06
transporter (PC00227)	754	301	286.83	+	1.05	0.483	0.781
serine protease inhibitor (PC00204)	147	58	55.92	+	1.04	0.814	1.03
C2H2 zinc finger transcription factor (PC00248)	188	74	71.52	+	1.03	0.782	1.01
methyltransferase (PC00155)	97	38	36.9	+	1.03	0.848	1.04
dehydratase (PC00091)	23	9	8.75	+	1.03	1	1.11
receptor (PC00197)	734	287	279.22	+	1.03	0.695	0.958
glycosidase (PC00110)	31	12	11.79	+	1.02	1	1.07
serine protease (PC00203)	321	124	122.11	+	1.02	0.873	1.05
extracellular matrix structural protein (PC00103)	39	15	14.84	+	1.01	1	1.03
acetylcholine receptor (PC00037)	52	20	19.78	+	1.01	1	1.13
GABA receptor (PC00023)	52	20	19.78	+	1.01	1	1.13
cation transporter (PC00068)	192	73	73.04	-	1	1	1
transfer/carrier protein (PC00219)	231	87	87.87	-	0.99	1	1.01
KRAB box transcription factor (PC00029)	165	62	62.77	-	0.99	1	1
voltage-gated potassium channel (PC00242)	16	6	6.09	-	0.99	1	1.1
potassium channel (PC00188)	16	6	6.09	-	0.99	1	1.09
storage protein (PC00210)	32	12	12.17	-	0.99	1	1.03
DNA binding protein (PC00009)	539	201	205.04	-	0.98	0.835	1.04
lipase (PC00143)	77	28	29.29	-	0.96	0.913	1.07
protease inhibitor (PC00191)	393	142	149.5	-	0.95	0.626	0.897
Unclassified (UNCLASSIFIED)	12790	4612	4865.4	-	0.95	1.99e-06	0.000107
vesicle coat protein (PC00235)	50	18	19.02	-	0.95	0.893	1.05
transaminase (PC00216)	25	9	9.51	-	0.95	1	1.06
signaling molecule (PC00207)	704	251	267.81	-	0.94	0.377	0.694
serine/threonine protein kinase receptor (PC00205)	17	6	6.47	-	0.93	1	1.16
nucleotidyltransferase (PC00174)	57	20	21.68	-	0.92	0.898	1.06
basic helix-loop-helix transcription factor (PC00055)	77	27	29.29	-	0.92	0.826	1.04
nucleotide phosphatase (PC00173)	38	13	14.46	-	0.9	0.876	1.05
DNA-directed RNA polymerase (PC00019)	47	16	17.88	-	0.89	0.779	1.01
membrane-bound signaling molecule (PC00152)	97	33	36.9	-	0.89	0.624	0.9
growth factor (PC00112)	139	47	52.88	-	0.89	0.511	0.802
immunoglobulin superfamily cell adhesion molecule (PC00125)	15	5	5.71	-	0.88	1	1.12
cell junction protein (PC00070)	111	37	42.23	-	0.88	0.52	0.804
MADS box transcription factor (PC00250)	6	2	2.28	-	0.88	1	1.16
amino acid kinase (PC00045)	6	2	2.28	-	0.88	1	1.15
DNA topoisomerase (PC00017)	3	1	1.14	-	0.88	1	1.04
tubulin (PC00228)	25	8	9.51	-	0.84	0.846	1.04
phospholipase (PC00186)	47	15	17.88	-	0.84	0.67	0.947
cell adhesion molecule (PC00069)	230	73	87.49	-	0.83	0.196	0.527
DNA methyltransferase (PC00013)	16	5	6.09	-	0.82	0.811	1.03
G-protein (PC00020)	198	61	75.32	-	0.81	0.162	0.478
winged helix/forkhead transcription factor (PC00246)	82	25	31.19	-	0.8	0.386	0.697
reductase (PC00198)	142	43	54.02	-	0.8	0.215	0.545
helix-turn-helix transcription factor (PC00116)	180	54	68.47	-	0.79	0.142	0.448
homeodomain transcription factor (PC00119)	98	29	37.28	-	0.78	0.273	0.619
G-protein coupled receptor (PC00021)	281	83	106.89	-	0.78	0.0446	0.223
type I cytokine receptor (PC00231)	35	10	13.31	-	0.75	0.506	0.806
TGF-beta receptor (PC00035)	14	4	5.33	-	0.75	0.794	1.02
ribosomal protein (PC00202)	259	73	98.53	-	0.74	0.0222	0.165
apolipoprotein (PC00052)	18	5	6.85	-	0.73	0.645	0.919
heterotrimeric G-protein (PC00117)	58	16	22.06	-	0.73	0.298	0.616
mitochondrial carrier protein (PC00158)	22	6	8.37	-	0.72	0.534	0.808
type II cytokine receptor (PC00232)	15	4	5.71	-	0.7	0.617	0.903
cytokine receptor (PC00084)	53	14	20.16	-	0.69	0.273	0.625
cytokine (PC00083)	114	30	43.37	-	0.69	0.0756	0.301
major histocompatibility complex antigen (PC00149)	24	6	9.13	-	0.66	0.419	0.727
phosphorylase (PC00187)	12	3	4.56	-	0.66	0.773	1.01
basic leucine zipper transcription factor (PC00056)	31	7	11.79	-	0.59	0.275	0.616
mutase (PC00160)	9	2	3.42	-	0.58	0.738	0.992
carbohydrate transporter (PC00067)	23	5	8.75	-	0.57	0.296	0.618
amino acid transporter (PC00046)	56	12	21.3	-	0.56	0.0767	0.3
myelin protein (PC00161)	14	3	5.33	-	0.56	0.43	0.74
pyrophosphatase (PC00196)	24	5	9.13	-	0.55	0.298	0.61
tumor necrosis factor family member (PC00229)	10	2	3.8	-	0.53	0.53	0.809
small GTPase (PC00208)	101	20	38.42	-	0.52	0.00571	0.0682
antibacterial response protein (PC00051)	66	13	25.11	-	0.52	0.0312	0.181
phosphatase modulator (PC00184)	62	12	23.59	-	0.51	0.0269	0.176
defense/immunity protein (PC00090)	326	62	124.01	-	0.5	8.56e-08	1.84e-05
neuropeptide (PC00162)	16	3	6.09	-	0.49	0.313	0.617
peptide hormone (PC00179)	76	14	28.91	-	0.48	0.00916	0.0985
aspartic protease (PC00053)	73	13	27.77	-	0.47	0.00778	0.0881
HMG box transcription factor (PC00024)	18	3	6.85	-	0.44	0.225	0.556
DNA glycosylase (PC00010)	6	1	2.28	-	0.44	0.682	0.952
phosphatase inhibitor (PC00183)	45	7	17.12	-	0.41	0.02	0.165
chemokine (PC00074)	46	7	17.5	-	0.4	0.02	0.159
tight junction (PC00214)	41	6	15.6	-	0.38	0.0217	0.167
gap junction (PC00105)	21	3	7.99	-	0.38	0.113	0.397
immunoglobulin receptor superfamily (PC00124)	85	11	32.33	-	0.34	0.000208	0.00373
histone (PC00118)	127	14	48.31	-	0.29	3.67e-07	3.95e-05
immunoglobulin (PC00123)	31	0	11.79	-	< 0.01	6.45e-05	0.00154
hydroxylase (PC00122)	5	0	1.9	-	< 0.01	0.332	0.631
cysteine protease inhibitor (PC00082)	7	0	2.66	-	< 0.01	0.201	0.534
centromere DNA-binding protein (PC00071)	1	0	0.38	-	< 0.01	1	1.09
amylase (PC00048)	2	0	0.76	-	< 0.01	1	1.14
tumor necrosis factor receptor (PC00230)	2	0	0.76	-	< 0.01	1	1.14
primase (PC00189)	1	0	0.38	-	< 0.01	1	1.08
phosphatase activator (PC00182)	1	0	0.38	-	< 0.01	1	1.08
CREB-related transcription factor (PC00006)	4	0	1.52	-	< 0.01	0.581	0.867

## Sheet: table 2a_Domain details
Database	Type	Domain Name	Start site	End Site	P-value according to databse
Phobius	SIGNAL_PEPTIDE	Signal peptide region	1	22	-
ProSitePatterns	PS01285	Coagulation factors 5/8 type C domain (FA58C) signature 1.	321	350	-
ProSitePatterns	PS01285	Coagulation factors 5/8 type C domain (FA58C) signature 1.	159	188	-
ProSitePatterns	PS01286	Coagulation factors 5/8 type C domain (FA58C) signature 2.	415	431	-
ProSitePatterns	PS01286	Coagulation factors 5/8 type C domain (FA58C) signature 2.	253	269	-
SMART	SM00231	Coagulation factor 5/8 C-terminal domain	112	269	8.1e-41
SMART	SM00231	Coagulation factor 5/8 C-terminal domain	273	431	1.2e-36
ProSiteProfiles	PS50022	Coagulation factors 5/8 type C domain (FA58C) profile.	274	431	49.518
ProSiteProfiles	PS50022	Coagulation factors 5/8 type C domain (FA58C) profile.	113	269	36.984
Pfam	PF00754	F5/8 type C domain	128	266	4e-24
Pfam	PF00754	F5/8 type C domain	289	428	3.6e-34
CDD	cd00057	FA58C	115	268	5.2e-49
PANTHER	PTHR44122:SF1	Reactome: R-HSA-381426|Reactome: R-HSA-8957275|Reactome: R-HSA-977225	111	431	6e-238
PANTHER	PTHR44122:SF1	Reactome: R-HSA-381426|Reactome: R-HSA-8957275|Reactome: R-HSA-977225	2	112	6e-238
SUPERFAMILY	SSF49785	Galactose-binding-like domain superfamily	112	270	1.93e-48
Gene3D	G3DSA:2.60.120.260	Galactose-binding-like domain superfamily	110	271	1.1e-50
Gene3D	G3DSA:2.60.120.260	Galactose-binding-like domain superfamily	272	431	2.1e-62
Pfam	PF00008	EGF-like domain	70	108	7.1e-07
Pfam	PF00008	EGF-like domain	28	59	4e-07
ProSitePatterns	PS01186	EGF-like domain signature 2.	51	62	-
ProSiteProfiles	PS50026	EGF-like domain profile.	24	63	18.798
ProSiteProfiles	PS50026	EGF-like domain profile.	66	110	17.086
ProSitePatterns	PS00022	EGF-like domain signature 1.	98	109	-
ProSitePatterns	PS00022	EGF-like domain signature 1.	51	62	-
SMART	SM00181	EGF-like domain	69	110	6e-06
SMART	SM00181	EGF-like domain	27	63	0.00027
CDD	cd00054	EGF_CA	26	62	0.000915
CDD	cd00054	EGF_CA	72	110	2.31e-05
SUPERFAMILY	SSF49785	Galactose-binding-like domain superfamily	273	431	4.96e-58
Gene3D	G3DSA:2.10.25.10		67	109	1.1e-08
Phobius	NON_CYTOPLASMIC_DOMAIN	Region of a membrane-bound protein predicted to be outside the membrane, in the extracellular region.	23	431	-
CDD	cd00057	FA58C	276	430	1.75e-54
